# Supplementary material for: Haplotype-resolved 3D chromatin architecture of the hybrid pig
Source: HighWire-hosted journal article supplement (doi:10.1101/gr.278101.123), 2024-02-01
Supplement: Supplemental_Table_S1.xlsx [file Supplemental_Table_S1.xlsx]

## Sheet: Sheet 1 (Summary)
Comparison	A/B switch type	Accumulative lengths (Mb)	% of the genome (autosomes only)	Mean A-B index in the former tissue	Mean A-B index in the lattter tissue	ΔA-B index (former vs. latter)	Gene number	Median TPM in the former tissue	Median TPM in the latter tissue	Median value of log2FC of expression (former / latter)
Liver vs. Muscle	Liver-restricted A compartments	94.02	4.15	1.31	-1.38	2.69	742	3.05	1.01	1.24
	Muscle-restricted A compartments	104.6	4.62	-1.43	1.26	-2.69	518	2.45	13.22	-0.94
Liver vs. Brain	Liver-restricted A compartments	127.68	5.64	1.35	-1.06	2.42	433	6.83	3.04	1.06
	Brain-restricted A compartments	96.12	4.24	-1.79	0.94	-2.73	880	1.91	10.09	-1.19
Muscle vs. Brain	Muscle-restricted A compartments	151.58	6.69	1.37	-1	2.37	552	13.09	4.91	0.45
	Brain-restricted A compartments	99.52	4.39	-1.47	0.89	-2.36	797	1.01	4.07	-1.23

## Sheet: Sheet 2
A/B switches between liver and muscle	Chromosome	Start	End	Mean A-B index in the liver	Mean A-B index in the muscle	ΔA-B index (liver – muscle)	GeneID	Symbol	Mean TPM in liver	Mean TPM in muscle	log2FC of expression (liver / muscle)	P-value of expression
Liver-specific A compartments	1	12420000	12440000	0.978544	-0.418071	1.39661	-	-	-	-	-	-
Liver-specific A compartments	1	12440000	12460000	0.722958	-0.450705	1.17366	-	-	-	-	-	-
Liver-specific A compartments	1	12460000	12480000	0.488206	-0.644864	1.13307	-	-	-	-	-	-
Liver-specific A compartments	1	13740000	13760000	0.286766	-1.583	1.86977	-	-	-	-	-	-
Liver-specific A compartments	1	14620000	14640000	2.36641	-0.259854	2.62627	-	-	-	-	-	-
Liver-specific A compartments	1	14660000	14680000	2.54212	-0.270301	2.81242	-	-	-	-	-	-
Liver-specific A compartments	1	17740000	17760000	0.719244	-0.465923	1.18517	-	-	-	-	-	-
Liver-specific A compartments	1	17760000	17780000	0.647401	-0.615256	1.26266	-	-	-	-	-	-
Liver-specific A compartments	1	17780000	17800000	0.715411	-0.74799	1.4634	-	-	-	-	-	-
Liver-specific A compartments	1	17800000	17820000	0.623492	-0.771341	1.39483	-	-	-	-	-	-
Liver-specific A compartments	1	17820000	17840000	0.646756	-0.545704	1.19246	-	-	-	-	-	-
Liver-specific A compartments	1	17840000	17860000	0.700535	-0.519474	1.22001	-	-	-	-	-	-
Liver-specific A compartments	1	17860000	17880000	0.740932	-0.597278	1.33821	-	-	-	-	-	-
Liver-specific A compartments	1	17880000	17900000	0.564277	-0.588526	1.1528	-	-	-	-	-	-
Liver-specific A compartments	1	17900000	17920000	0.392651	-0.487	0.879651	-	-	-	-	-	-
Liver-specific A compartments	1	17920000	17940000	0.488564	-0.519123	1.00769	-	-	-	-	-	-
Liver-specific A compartments	1	17940000	17960000	0.605611	-0.426294	1.0319	ENSSSCG00000046147	Unknown	0.55	0.53	0.338426	0.476658
Liver-specific A compartments	1	17960000	17980000	0.375521	-0.641985	1.01751	-	-	-	-	-	-
Liver-specific A compartments	1	17980000	18000000	0.408218	-0.730129	1.13835	-	-	-	-	-	-
Liver-specific A compartments	1	18000000	18020000	0.350822	-0.980971	1.33179	-	-	-	-	-	-
Liver-specific A compartments	1	18020000	18040000	0.471906	-1.08748	1.55938	-	-	-	-	-	-
Liver-specific A compartments	1	18060000	18080000	0.277231	-1.11468	1.39192	-	-	-	-	-	-
Liver-specific A compartments	1	18120000	18140000	0.432626	-1.55504	1.98767	-	-	-	-	-	-
Liver-specific A compartments	1	18140000	18160000	0.329306	-1.47638	1.80568	-	-	-	-	-	-
Liver-specific A compartments	1	18160000	18180000	0.599243	-1.25157	1.85082	-	-	-	-	-	-
Liver-specific A compartments	1	18180000	18200000	0.865418	-0.986672	1.85209	-	-	-	-	-	-
Liver-specific A compartments	1	18200000	18220000	0.846655	-0.937889	1.78454	-	-	-	-	-	-
Liver-specific A compartments	1	18220000	18240000	0.864198	-0.710789	1.57499	-	-	-	-	-	-
Liver-specific A compartments	1	18240000	18260000	1.06098	-0.633554	1.69454	-	-	-	-	-	-
Liver-specific A compartments	1	18260000	18280000	1.0275	-0.478286	1.50579	-	-	-	-	-	-
Liver-specific A compartments	1	18280000	18300000	1.14229	-0.222375	1.36466	ENSSSCG00000048240	SAMD5	11.63	4.41	1.67747	1.43145e-12
Liver-specific A compartments	1	18300000	18320000	1.10727	-0.443104	1.55037	-	-	-	-	-	-
Liver-specific A compartments	1	18320000	18340000	1.20637	-0.46026	1.66663	-	-	-	-	-	-
Liver-specific A compartments	1	18520000	18540000	1.34625	-0.548567	1.89481	-	-	-	-	-	-
Liver-specific A compartments	1	18540000	18560000	0.91185	-1.41063	2.32248	-	-	-	-	-	-
Liver-specific A compartments	1	18800000	18820000	0.577987	-2.07303	2.65102	-	-	-	-	-	-
Liver-specific A compartments	1	18820000	18840000	0.803833	-1.78673	2.59056	-	-	-	-	-	-
Liver-specific A compartments	1	18840000	18860000	0.606085	-1.52985	2.13594	-	-	-	-	-	-
Liver-specific A compartments	1	18860000	18880000	0.249014	-1.80248	2.05149	-	-	-	-	-	-
Liver-specific A compartments	1	19060000	19080000	0.516826	-1.68989	2.20671	-	-	-	-	-	-
Liver-specific A compartments	1	19080000	19100000	0.643178	-1.35729	2.00047	ENSSSCG00000004114	RAB32	97.33	24.85	1.94477	7.47457e-19
Liver-specific A compartments	1	25580000	25600000	1.54345	-0.270359	1.81381	-	-	-	-	-	-
Liver-specific A compartments	1	25600000	25620000	1.67508	-0.406723	2.0818	-	-	-	-	-	-
Liver-specific A compartments	1	25680000	25700000	2.46761	-0.244494	2.7121	-	-	-	-	-	-
Liver-specific A compartments	1	25700000	25720000	2.47105	-0.423769	2.89482	-	-	-	-	-	-
Liver-specific A compartments	1	25960000	25980000	2.24334	-0.516822	2.76016	-	-	-	-	-	-
Liver-specific A compartments	1	25980000	26000000	2.01559	-0.303448	2.31904	-	-	-	-	-	-
Liver-specific A compartments	1	26000000	26020000	1.89253	-0.387479	2.28001	ENSSSCG00000004150	HEBP2	9.46	5.3	0.801082	0.00272642
Liver-specific A compartments	1	26020000	26040000	1.58833	-1.02659	2.61492	ENSSSCG00000048346	SMIM28	0.03	0	-	-
Liver-specific A compartments	1	26040000	26060000	1.49981	-1.14309	2.6429	ENSSSCG00000004151	Unknown	1.69	0.34	3.90533	0.0440675
Liver-specific A compartments	1	26060000	26080000	1.38547	-1.02168	2.40715	-	-	-	-	-	-
Liver-specific A compartments	1	26080000	26100000	1.18465	-0.847103	2.03176	-	-	-	-	-	-
Liver-specific A compartments	1	26100000	26120000	1.2315	-0.504412	1.73591	-	-	-	-	-	-
Liver-specific A compartments	1	26120000	26140000	1.37399	-0.232898	1.60688	-	-	-	-	-	-
Liver-specific A compartments	1	26300000	26320000	1.96502	-0.336143	2.30116	ENSSSCG00000038420	PERP	138.04	6.26	4.52652	6.415e-51
Liver-specific A compartments	1	26320000	26340000	2.10697	-0.772217	2.87919	-	-	-	-	-	-
Liver-specific A compartments	1	26340000	26360000	2.15844	-0.599383	2.75783	-	-	-	-	-	-
Liver-specific A compartments	1	26360000	26380000	2.04933	-0.429474	2.47881	-	-	-	-	-	-
Liver-specific A compartments	1	26720000	26740000	2.57587	-0.876217	3.45208	-	-	-	-	-	-
Liver-specific A compartments	1	26740000	26760000	2.5209	-0.93891	3.45981	-	-	-	-	-	-
Liver-specific A compartments	1	26760000	26780000	2.40373	-1.06446	3.46818	-	-	-	-	-	-
Liver-specific A compartments	1	26780000	26800000	2.363	-1.03087	3.39387	-	-	-	-	-	-
Liver-specific A compartments	1	26800000	26820000	2.20835	-1.11715	3.3255	ENSSSCG00000004155	OLIG3	0.09	0	-	-
Liver-specific A compartments	1	26820000	26840000	2.25534	-0.922471	3.17781	-	-	-	-	-	-
Liver-specific A compartments	1	26840000	26860000	2.16184	-0.901834	3.06368	-	-	-	-	-	-
Liver-specific A compartments	1	26860000	26880000	2.35825	-1.0146	3.37285	-	-	-	-	-	-
Liver-specific A compartments	1	26880000	26900000	2.65653	-1.00584	3.66237	-	-	-	-	-	-
Liver-specific A compartments	1	26900000	26920000	2.8262	-0.639703	3.4659	-	-	-	-	-	-
Liver-specific A compartments	1	27140000	27160000	2.8979	-0.315524	3.21342	-	-	-	-	-	-
Liver-specific A compartments	1	28800000	28820000	2.31378	-0.371447	2.68523	-	-	-	-	-	-
Liver-specific A compartments	1	30000000	30020000	0.484817	-0.285156	0.769973	-	-	-	-	-	-
Liver-specific A compartments	1	31020000	31040000	1.21271	-0.434463	1.64717	-	-	-	-	-	-
Liver-specific A compartments	1	31040000	31060000	1.13082	-0.438847	1.56967	-	-	-	-	-	-
Liver-specific A compartments	1	31060000	31080000	0.793845	-0.544386	1.33823	ENSSSCG00000004183	TAAR2	0.01	0	-	-
Liver-specific A compartments	1	31080000	31100000	0.973346	-0.450939	1.42428	ENSSSCG00000004184;ENSSSCG00000037870	Unknown;Unknown	0;0.03	0;0	-;-	-;-
Liver-specific A compartments	1	31100000	31120000	0.766064	-0.45223	1.21829	ENSSSCG00000037590	TAAR8	0.04	0	-	-
Liver-specific A compartments	1	31120000	31140000	0.961501	-0.413396	1.3749	ENSSSCG00000040065	TAAR6	0.01	0	-	-
Liver-specific A compartments	1	32640000	32660000	1.16847	-0.343867	1.51234	ENSSSCG00000033538	SMLR1	127.87	0.04	13.4695	4.89128e-33
Liver-specific A compartments	1	32660000	32680000	0.807083	-0.553292	1.36038	-	-	-	-	-	-
Liver-specific A compartments	1	33200000	33220000	0.640046	-0.284176	0.924221	-	-	-	-	-	-
Liver-specific A compartments	1	33340000	33360000	0.899025	-0.169539	1.06856	-	-	-	-	-	-
Liver-specific A compartments	1	33360000	33380000	0.575964	-0.27244	0.848404	-	-	-	-	-	-
Liver-specific A compartments	1	33380000	33400000	0.554302	-0.266989	0.82129	-	-	-	-	-	-
Liver-specific A compartments	1	42580000	42600000	0.414175	-1.79228	2.20645	-	-	-	-	-	-
Liver-specific A compartments	1	42620000	42640000	0.5114	-1.50727	2.01867	-	-	-	-	-	-
Liver-specific A compartments	1	42640000	42660000	0.713698	-1.11736	1.83106	-	-	-	-	-	-
Liver-specific A compartments	1	42660000	42680000	1.05654	-0.970343	2.02688	-	-	-	-	-	-
Liver-specific A compartments	1	42680000	42700000	1.28318	-0.728826	2.01201	-	-	-	-	-	-
Liver-specific A compartments	1	42700000	42720000	1.6786	-0.557239	2.23584	-	-	-	-	-	-
Liver-specific A compartments	1	42740000	42760000	1.79232	-0.489588	2.2819	-	-	-	-	-	-
Liver-specific A compartments	1	42760000	42780000	1.44974	-0.713137	2.16287	-	-	-	-	-	-
Liver-specific A compartments	1	42780000	42800000	1.44228	-0.781229	2.22351	-	-	-	-	-	-
Liver-specific A compartments	1	42800000	42820000	1.30676	-0.794982	2.10174	-	-	-	-	-	-
Liver-specific A compartments	1	42820000	42840000	1.35701	-0.882073	2.23908	-	-	-	-	-	-
Liver-specific A compartments	1	42840000	42860000	1.23664	-0.835754	2.07239	-	-	-	-	-	-
Liver-specific A compartments	1	42860000	42880000	1.07881	-0.629357	1.70817	-	-	-	-	-	-
Liver-specific A compartments	1	42880000	42900000	0.92073	-0.718703	1.63943	-	-	-	-	-	-
Liver-specific A compartments	1	42900000	42920000	0.675777	-0.673044	1.34882	-	-	-	-	-	-
Liver-specific A compartments	1	45000000	45020000	0.5331	-0.265734	0.798834	-	-	-	-	-	-
Liver-specific A compartments	1	51280000	51300000	0.576199	-0.317214	0.893414	-	-	-	-	-	-
Liver-specific A compartments	1	55520000	55540000	0.567251	-0.286948	0.8542	-	-	-	-	-	-
Liver-specific A compartments	1	55540000	55560000	0.829612	-0.115716	0.945329	-	-	-	-	-	-
Liver-specific A compartments	1	56340000	56360000	0.484692	-0.409302	0.893994	-	-	-	-	-	-
Liver-specific A compartments	1	56360000	56380000	0.360665	-0.617541	0.978207	ENSSSCG00000004308	SPACA1	11.43	0.33	5.24057	1.68373e-07
Liver-specific A compartments	1	56720000	56740000	0.322956	-0.728819	1.05178	-	-	-	-	-	-
Liver-specific A compartments	1	56740000	56760000	0.544895	-0.528181	1.07308	-	-	-	-	-	-
Liver-specific A compartments	1	56760000	56780000	0.734226	-0.37807	1.1123	-	-	-	-	-	-
Liver-specific A compartments	1	71020000	71040000	0.438785	-0.784188	1.22297	-	-	-	-	-	-
Liver-specific A compartments	1	71040000	71060000	0.587124	-0.562617	1.14974	-	-	-	-	-	-
Liver-specific A compartments	1	71060000	71080000	0.675395	-0.559832	1.23523	-	-	-	-	-	-
Liver-specific A compartments	1	71080000	71100000	0.872575	-0.32207	1.19465	-	-	-	-	-	-
Liver-specific A compartments	1	71100000	71120000	0.874115	-0.522495	1.39661	ENSSSCG00000004364	HACE1	56.85	22.22	1.5194	2.05633e-10
Liver-specific A compartments	1	71120000	71140000	0.769739	-1.10291	1.87265	-	-	-	-	-	-
Liver-specific A compartments	1	71140000	71160000	0.791672	-1.37299	2.16467	-	-	-	-	-	-
Liver-specific A compartments	1	71160000	71180000	1.27045	-1.6233	2.89375	ENSSSCG00000037612	LIN28B	14.81	0.09	8.0316	2.24543e-37
Liver-specific A compartments	1	71180000	71200000	1.06855	-1.82719	2.89574	-	-	-	-	-	-
Liver-specific A compartments	1	71200000	71220000	0.795749	-2.03694	2.83269	-	-	-	-	-	-
Liver-specific A compartments	1	71220000	71240000	0.544917	-2.01007	2.55498	-	-	-	-	-	-
Liver-specific A compartments	1	71240000	71260000	0.528375	-1.96812	2.4965	-	-	-	-	-	-
Liver-specific A compartments	1	71260000	71280000	0.543906	-1.57284	2.11675	-	-	-	-	-	-
Liver-specific A compartments	1	71280000	71300000	0.527456	-0.907231	1.43469	-	-	-	-	-	-
Liver-specific A compartments	1	71680000	71700000	1.10358	-0.347626	1.45121	-	-	-	-	-	-
Liver-specific A compartments	1	71700000	71720000	1.14062	-0.352753	1.49337	ENSSSCG00000004368	PREP	37.85	59.16	-0.376762	0.287363
Liver-specific A compartments	1	71720000	71740000	1.00949	-0.51665	1.52614	-	-	-	-	-	-
Liver-specific A compartments	1	71740000	71760000	0.842481	-0.7786	1.62108	-	-	-	-	-	-
Liver-specific A compartments	1	71760000	71780000	0.761754	-0.961005	1.72276	-	-	-	-	-	-
Liver-specific A compartments	1	71780000	71800000	0.732515	-1.05739	1.78991	-	-	-	-	-	-
Liver-specific A compartments	1	71800000	71820000	0.65506	-1.13633	1.79139	-	-	-	-	-	-
Liver-specific A compartments	1	71820000	71840000	0.753314	-1.09159	1.8449	-	-	-	-	-	-
Liver-specific A compartments	1	71840000	71860000	0.7875	-1.07016	1.85766	-	-	-	-	-	-
Liver-specific A compartments	1	71860000	71880000	0.695719	-1.30414	1.99986	-	-	-	-	-	-
Liver-specific A compartments	1	71880000	71900000	0.751065	-1.17279	1.92386	-	-	-	-	-	-
Liver-specific A compartments	1	71900000	71920000	0.783225	-1.27922	2.06245	-	-	-	-	-	-
Liver-specific A compartments	1	71920000	71940000	0.674633	-0.947835	1.62247	-	-	-	-	-	-
Liver-specific A compartments	1	71940000	71960000	0.725305	-1.02843	1.75374	-	-	-	-	-	-
Liver-specific A compartments	1	71960000	71980000	0.753066	-0.707409	1.46048	ENSSSCG00000042384	Unknown	0.17	0.37	-	-
Liver-specific A compartments	1	71980000	72000000	0.909136	-0.699113	1.60825	-	-	-	-	-	-
Liver-specific A compartments	1	72000000	72020000	1.0429	-0.455277	1.49818	-	-	-	-	-	-
Liver-specific A compartments	1	72540000	72560000	1.93727	-0.723974	2.66125	-	-	-	-	-	-
Liver-specific A compartments	1	72560000	72580000	1.88951	-1.08594	2.97545	-	-	-	-	-	-
Liver-specific A compartments	1	72580000	72600000	1.68004	-1.28801	2.96805	-	-	-	-	-	-
Liver-specific A compartments	1	72600000	72620000	1.84102	-1.16358	3.0046	-	-	-	-	-	-
Liver-specific A compartments	1	72620000	72640000	1.87043	-0.729662	2.60009	-	-	-	-	-	-
Liver-specific A compartments	1	72640000	72660000	1.98713	-0.539953	2.52708	-	-	-	-	-	-
Liver-specific A compartments	1	72660000	72680000	2.02331	-0.584537	2.60785	-	-	-	-	-	-
Liver-specific A compartments	1	72700000	72720000	2.53156	-0.307539	2.8391	ENSSSCG00000046528	Unknown	0.79	0.02	7.78471	3.18183e-07
Liver-specific A compartments	1	72860000	72880000	1.84215	-0.767889	2.61004	-	-	-	-	-	-
Liver-specific A compartments	1	72880000	72900000	1.77655	-1.16254	2.93909	-	-	-	-	-	-
Liver-specific A compartments	1	72900000	72920000	1.5956	-1.4383	3.0339	-	-	-	-	-	-
Liver-specific A compartments	1	72920000	72940000	1.56682	-1.52992	3.09674	-	-	-	-	-	-
Liver-specific A compartments	1	72940000	72960000	1.75473	-1.74561	3.50034	-	-	-	-	-	-
Liver-specific A compartments	1	72960000	72980000	1.72252	-1.80677	3.52929	-	-	-	-	-	-
Liver-specific A compartments	1	72980000	73000000	1.64346	-2.01341	3.65687	-	-	-	-	-	-
Liver-specific A compartments	1	73000000	73020000	1.62819	-1.98982	3.618	-	-	-	-	-	-
Liver-specific A compartments	1	73020000	73040000	1.6352	-2.14368	3.77889	-	-	-	-	-	-
Liver-specific A compartments	1	73040000	73060000	1.66873	-2.019	3.68773	-	-	-	-	-	-
Liver-specific A compartments	1	73060000	73080000	1.68975	-1.81898	3.50873	-	-	-	-	-	-
Liver-specific A compartments	1	73080000	73100000	1.77946	-1.47414	3.2536	-	-	-	-	-	-
Liver-specific A compartments	1	73100000	73120000	1.8054	-0.933083	2.73849	-	-	-	-	-	-
Liver-specific A compartments	1	75900000	75920000	1.15183	-0.778078	1.92991	-	-	-	-	-	-
Liver-specific A compartments	1	75920000	75940000	1.19513	-0.753035	1.94816	-	-	-	-	-	-
Liver-specific A compartments	1	75940000	75960000	1.03441	-0.867041	1.90146	-	-	-	-	-	-
Liver-specific A compartments	1	76020000	76040000	0.83371	-1.02158	1.85529	-	-	-	-	-	-
Liver-specific A compartments	1	84120000	84140000	0.271146	-0.566991	0.838137	-	-	-	-	-	-
Liver-specific A compartments	1	84140000	84160000	0.225535	-0.756823	0.982358	-	-	-	-	-	-
Liver-specific A compartments	1	84300000	84320000	0.266595	-0.881083	1.14768	-	-	-	-	-	-
Liver-specific A compartments	1	84320000	84340000	0.411111	-0.791904	1.20302	-	-	-	-	-	-
Liver-specific A compartments	1	84340000	84360000	0.551751	-0.96618	1.51793	-	-	-	-	-	-
Liver-specific A compartments	1	84360000	84380000	0.619411	-0.726873	1.34628	ENSSSCG00000031482	Unknown	0	0	-	-
Liver-specific A compartments	1	84380000	84400000	0.647904	-0.613759	1.26166	-	-	-	-	-	-
Liver-specific A compartments	1	84400000	84420000	0.720566	-0.642419	1.36299	-	-	-	-	-	-
Liver-specific A compartments	1	84420000	84440000	0.74997	-0.498135	1.2481	-	-	-	-	-	-
Liver-specific A compartments	1	84440000	84460000	1.02683	-0.419018	1.44585	-	-	-	-	-	-
Liver-specific A compartments	1	84460000	84480000	1.17062	-0.239773	1.41039	-	-	-	-	-	-
Liver-specific A compartments	1	84480000	84500000	1.19888	-0.40626	1.60514	-	-	-	-	-	-
Liver-specific A compartments	1	84500000	84520000	1.18348	-0.501584	1.68507	-	-	-	-	-	-
Liver-specific A compartments	1	84520000	84540000	1.2763	-0.30149	1.57779	-	-	-	-	-	-
Liver-specific A compartments	1	84540000	84560000	0.829618	-0.365862	1.19548	ENSSSCG00000004464	TENT5A	93.2	35.23	1.57298	2.38729e-08
Liver-specific A compartments	1	84560000	84580000	0.538358	-0.856219	1.39458	-	-	-	-	-	-
Liver-specific A compartments	1	84580000	84600000	0.343071	-1.21413	1.5572	-	-	-	-	-	-
Liver-specific A compartments	1	84620000	84640000	0.140749	-1.57447	1.71522	-	-	-	-	-	-
Liver-specific A compartments	1	86440000	86460000	0.869664	-0.41345	1.28311	-	-	-	-	-	-
Liver-specific A compartments	1	86480000	86500000	1.25125	-0.241578	1.49282	ENSSSCG00000032015	SH3BGRL2	184.69	11.66	3.99895	2.14862e-57
Liver-specific A compartments	1	86500000	86520000	1.14885	-0.638877	1.78773	ENSSSCG00000004469	LCA5	1.05	1.23	-0.0554282	0.911865
Liver-specific A compartments	1	86520000	86540000	0.887212	-0.850868	1.73808	-	-	-	-	-	-
Liver-specific A compartments	1	86540000	86560000	0.539597	-0.858623	1.39822	-	-	-	-	-	-
Liver-specific A compartments	1	96780000	96800000	1.24886	-0.237023	1.48588	-	-	-	-	-	-
Liver-specific A compartments	1	96800000	96820000	0.744562	-0.876123	1.62069	-	-	-	-	-	-
Liver-specific A compartments	1	96820000	96840000	0.390016	-1.37138	1.7614	-	-	-	-	-	-
Liver-specific A compartments	1	97280000	97300000	0.441206	-1.46191	1.90312	-	-	-	-	-	-
Liver-specific A compartments	1	97300000	97320000	0.606992	-0.969613	1.57661	-	-	-	-	-	-
Liver-specific A compartments	1	97320000	97340000	0.944186	-0.356475	1.30066	-	-	-	-	-	-
Liver-specific A compartments	1	99340000	99360000	1.84434	-0.263313	2.10766	-	-	-	-	-	-
Liver-specific A compartments	1	99360000	99380000	1.64987	-0.552451	2.20232	-	-	-	-	-	-
Liver-specific A compartments	1	99380000	99400000	1.63053	-0.773698	2.40423	-	-	-	-	-	-
Liver-specific A compartments	1	99400000	99420000	1.51434	-0.574088	2.08842	-	-	-	-	-	-
Liver-specific A compartments	1	99440000	99460000	1.73964	-0.150422	1.89006	-	-	-	-	-	-
Liver-specific A compartments	1	99460000	99480000	1.70828	-0.285566	1.99385	-	-	-	-	-	-
Liver-specific A compartments	1	99480000	99500000	1.68818	-0.881794	2.56998	-	-	-	-	-	-
Liver-specific A compartments	1	99500000	99520000	1.62544	-1.1257	2.75114	-	-	-	-	-	-
Liver-specific A compartments	1	99520000	99540000	1.57951	-1.4109	2.99042	-	-	-	-	-	-
Liver-specific A compartments	1	99540000	99560000	1.44591	-1.52127	2.96718	-	-	-	-	-	-
Liver-specific A compartments	1	99560000	99580000	1.33099	-1.80458	3.13557	-	-	-	-	-	-
Liver-specific A compartments	1	99580000	99600000	1.34427	-1.80682	3.15109	-	-	-	-	-	-
Liver-specific A compartments	1	99600000	99620000	1.29308	-1.94407	3.23715	-	-	-	-	-	-
Liver-specific A compartments	1	99620000	99640000	1.28873	-1.97489	3.26362	-	-	-	-	-	-
Liver-specific A compartments	1	99640000	99660000	1.4692	-2.00717	3.47637	-	-	-	-	-	-
Liver-specific A compartments	1	99660000	99680000	1.34913	-1.88831	3.23744	-	-	-	-	-	-
Liver-specific A compartments	1	99680000	99700000	1.36379	-1.98809	3.35189	-	-	-	-	-	-
Liver-specific A compartments	1	99700000	99720000	1.3613	-1.95849	3.31979	-	-	-	-	-	-
Liver-specific A compartments	1	99720000	99740000	1.5249	-1.77964	3.30455	ENSSSCG00000049462	Unknown	1.7	0.45	1.99202	1.97169e-09
Liver-specific A compartments	1	99740000	99760000	1.45283	-1.72749	3.18033	ENSSSCG00000045942	Unknown	2.65	3.53	-0.149029	0.631305
Liver-specific A compartments	1	99760000	99780000	1.60051	-1.66747	3.26798	-	-	-	-	-	-
Liver-specific A compartments	1	99780000	99800000	1.67983	-1.37322	3.05305	-	-	-	-	-	-
Liver-specific A compartments	1	99800000	99820000	1.76203	-0.857254	2.61929	ENSSSCG00000004511	MYO5B	16.59	3.07	2.64773	2.67099e-17
Liver-specific A compartments	1	99820000	99840000	1.92964	-0.557037	2.48668	-	-	-	-	-	-
Liver-specific A compartments	1	99840000	99860000	2.17628	-0.448293	2.62458	ENSSSCG00000041158	Unknown	0.26	0.36	-	-
Liver-specific A compartments	1	99860000	99880000	2.51145	-0.183206	2.69466	-	-	-	-	-	-
Liver-specific A compartments	1	100020000	100040000	1.20637	-0.591043	1.79741	-	-	-	-	-	-
Liver-specific A compartments	1	100040000	100060000	0.949426	-0.662977	1.6124	-	-	-	-	-	-
Liver-specific A compartments	1	100060000	100080000	0.875223	-0.852862	1.72809	-	-	-	-	-	-
Liver-specific A compartments	1	100120000	100140000	0.855628	-0.34645	1.20208	-	-	-	-	-	-
Liver-specific A compartments	1	100140000	100160000	0.901245	-0.374711	1.27596	-	-	-	-	-	-
Liver-specific A compartments	1	100160000	100180000	0.928035	-0.344252	1.27229	-	-	-	-	-	-
Liver-specific A compartments	1	100320000	100340000	1.19968	-0.367965	1.56765	-	-	-	-	-	-
Liver-specific A compartments	1	100740000	100760000	0.75975	-0.423595	1.18335	-	-	-	-	-	-
Liver-specific A compartments	1	100760000	100780000	0.57331	-0.623052	1.19636	-	-	-	-	-	-
Liver-specific A compartments	1	100780000	100800000	0.503726	-0.742296	1.24602	-	-	-	-	-	-
Liver-specific A compartments	1	100840000	100860000	0.512107	-0.908262	1.42037	-	-	-	-	-	-
Liver-specific A compartments	1	106420000	106440000	2.37164	-0.261473	2.63311	-	-	-	-	-	-
Liver-specific A compartments	1	106440000	106460000	2.37312	-0.548884	2.922	-	-	-	-	-	-
Liver-specific A compartments	1	106460000	106480000	2.31592	-0.92709	3.24301	-	-	-	-	-	-
Liver-specific A compartments	1	106480000	106500000	2.29287	-0.79979	3.09266	-	-	-	-	-	-
Liver-specific A compartments	1	106500000	106520000	2.18298	-0.985923	3.1689	-	-	-	-	-	-
Liver-specific A compartments	1	106520000	106540000	2.05367	-1.20621	3.25988	ENSSSCG00000046392	Unknown	0.34	4.92	-3.7967	1.14628e-14
Liver-specific A compartments	1	106540000	106560000	2.03426	-1.14082	3.17508	-	-	-	-	-	-
Liver-specific A compartments	1	106560000	106580000	2.12848	-1.04361	3.17209	-	-	-	-	-	-
Liver-specific A compartments	1	106580000	106600000	2.09863	-1.23433	3.33297	-	-	-	-	-	-
Liver-specific A compartments	1	106600000	106620000	2.131	-1.22651	3.35752	-	-	-	-	-	-
Liver-specific A compartments	1	106620000	106640000	2.32783	-1.25299	3.58082	-	-	-	-	-	-
Liver-specific A compartments	1	106640000	106660000	2.33217	-1.34063	3.6728	-	-	-	-	-	-
Liver-specific A compartments	1	106660000	106680000	2.35068	-1.38913	3.73981	-	-	-	-	-	-
Liver-specific A compartments	1	106680000	106700000	2.56789	-1.15832	3.72622	ENSSSCG00000038971	ST8SIA3	0.77	0.07	4.01144	5.15936e-09
Liver-specific A compartments	1	106700000	106720000	2.69985	-0.982892	3.68274	-	-	-	-	-	-
Liver-specific A compartments	1	106720000	106740000	2.76067	-0.569338	3.33001	-	-	-	-	-	-
Liver-specific A compartments	1	111680000	111700000	1.61735	-0.733659	2.35101	-	-	-	-	-	-
Liver-specific A compartments	1	111700000	111720000	1.16636	-1.43526	2.60162	-	-	-	-	-	-
Liver-specific A compartments	1	111720000	111740000	1.01875	-2.0192	3.03795	-	-	-	-	-	-
Liver-specific A compartments	1	111740000	111760000	0.87824	-2.41393	3.29217	-	-	-	-	-	-
Liver-specific A compartments	1	111760000	111780000	0.801745	-2.66655	3.46829	-	-	-	-	-	-
Liver-specific A compartments	1	111780000	111800000	0.828278	-2.76901	3.59729	-	-	-	-	-	-
Liver-specific A compartments	1	111800000	111820000	0.627667	-2.96189	3.58955	-	-	-	-	-	-
Liver-specific A compartments	1	111820000	111840000	0.548601	-3.09174	3.64034	-	-	-	-	-	-
Liver-specific A compartments	1	111840000	111860000	0.562935	-3.40448	3.96741	-	-	-	-	-	-
Liver-specific A compartments	1	111860000	111880000	0.628707	-3.09741	3.72611	-	-	-	-	-	-
Liver-specific A compartments	1	111880000	111900000	0.692812	-2.95661	3.64942	-	-	-	-	-	-
Liver-specific A compartments	1	111900000	111920000	0.668259	-2.97578	3.64404	-	-	-	-	-	-
Liver-specific A compartments	1	111920000	111940000	0.709972	-2.76308	3.47306	-	-	-	-	-	-
Liver-specific A compartments	1	111940000	111960000	0.72558	-2.89844	3.62402	-	-	-	-	-	-
Liver-specific A compartments	1	111960000	111980000	0.723489	-2.97362	3.69711	-	-	-	-	-	-
Liver-specific A compartments	1	111980000	112000000	0.632988	-2.85459	3.48757	-	-	-	-	-	-
Liver-specific A compartments	1	112000000	112020000	0.703358	-2.91353	3.61689	ENSSSCG00000035244	FOXB1	0.01	0	-	-
Liver-specific A compartments	1	112020000	112040000	0.624546	-3.24166	3.86621	-	-	-	-	-	-
Liver-specific A compartments	1	112040000	112060000	0.614087	-3.41587	4.02996	-	-	-	-	-	-
Liver-specific A compartments	1	112060000	112080000	0.534596	-3.67308	4.20768	-	-	-	-	-	-
Liver-specific A compartments	1	112080000	112100000	0.506081	-3.68145	4.18753	-	-	-	-	-	-
Liver-specific A compartments	1	112100000	112120000	0.511272	-3.74538	4.25665	-	-	-	-	-	-
Liver-specific A compartments	1	112120000	112140000	0.516147	-3.82004	4.33619	-	-	-	-	-	-
Liver-specific A compartments	1	112140000	112160000	0.493985	-3.76518	4.25916	-	-	-	-	-	-
Liver-specific A compartments	1	112180000	112200000	0.668475	-3.53995	4.20842	-	-	-	-	-	-
Liver-specific A compartments	1	112200000	112220000	0.750508	-3.51175	4.26226	-	-	-	-	-	-
Liver-specific A compartments	1	112220000	112240000	0.769255	-3.43561	4.20486	-	-	-	-	-	-
Liver-specific A compartments	1	112240000	112260000	0.964757	-3.13944	4.1042	-	-	-	-	-	-
Liver-specific A compartments	1	112260000	112280000	1.19631	-2.68161	3.87792	-	-	-	-	-	-
Liver-specific A compartments	1	112280000	112300000	1.59868	-2.23485	3.83354	-	-	-	-	-	-
Liver-specific A compartments	1	112300000	112320000	2.04927	-1.56115	3.61042	-	-	-	-	-	-
Liver-specific A compartments	1	112320000	112340000	2.6964	-0.584428	3.28083	-	-	-	-	-	-
Liver-specific A compartments	1	112440000	112460000	3.7222	-0.632651	4.35485	-	-	-	-	-	-
Liver-specific A compartments	1	112460000	112480000	3.63935	-0.715688	4.35503	-	-	-	-	-	-
Liver-specific A compartments	1	112480000	112500000	3.57853	-0.506654	4.08519	-	-	-	-	-	-
Liver-specific A compartments	1	113820000	113840000	3.55092	-0.697429	4.24835	-	-	-	-	-	-
Liver-specific A compartments	1	113840000	113860000	3.71802	-1.10751	4.82552	ENSSSCG00000004597	AQP9	772.44	3.31	7.7665	4.98236e-64
Liver-specific A compartments	1	113860000	113880000	3.51798	-1.13417	4.65215	ENSSSCG00000046774	L1TD1	0.26	1.31	-2.245	3.83825e-05
Liver-specific A compartments	1	113880000	113900000	3.25499	-1.26881	4.5238	-	-	-	-	-	-
Liver-specific A compartments	1	113900000	113920000	3.02601	-1.02757	4.05358	-	-	-	-	-	-
Liver-specific A compartments	1	113920000	113940000	2.90879	-0.713888	3.62268	-	-	-	-	-	-
Liver-specific A compartments	1	113940000	113960000	3.19936	-0.815443	4.01481	-	-	-	-	-	-
Liver-specific A compartments	1	113960000	113980000	3.05986	-0.986284	4.04614	-	-	-	-	-	-
Liver-specific A compartments	1	113980000	114000000	3.06539	-0.969994	4.03538	-	-	-	-	-	-
Liver-specific A compartments	1	114000000	114020000	3.20569	-1.03569	4.24138	-	-	-	-	-	-
Liver-specific A compartments	1	114020000	114040000	3.19735	-0.808311	4.00566	-	-	-	-	-	-
Liver-specific A compartments	1	116540000	116560000	0.465699	-0.629916	1.09561	-	-	-	-	-	-
Liver-specific A compartments	1	118880000	118900000	0.39073	-2.40182	2.79255	-	-	-	-	-	-
Liver-specific A compartments	1	118900000	118920000	0.757864	-1.78436	2.54222	ENSSSCG00000004616	ONECUT1	52.78	0.5	6.99905	7.64832e-106
Liver-specific A compartments	1	118920000	118940000	0.608607	-1.78039	2.38899	-	-	-	-	-	-
Liver-specific A compartments	1	118940000	118960000	0.730769	-1.45782	2.18858	-	-	-	-	-	-
Liver-specific A compartments	1	118960000	118980000	1.2863	-0.47444	1.76074	-	-	-	-	-	-
Liver-specific A compartments	1	119220000	119240000	0.971705	-0.490209	1.46191	-	-	-	-	-	-
Liver-specific A compartments	1	119240000	119260000	0.929981	-0.613542	1.54352	-	-	-	-	-	-
Liver-specific A compartments	1	119260000	119280000	0.728474	-0.532265	1.26074	-	-	-	-	-	-
Liver-specific A compartments	1	119280000	119300000	0.713244	-0.597863	1.31111	-	-	-	-	-	-
Liver-specific A compartments	1	119300000	119320000	0.761142	-0.781519	1.54266	-	-	-	-	-	-
Liver-specific A compartments	1	119320000	119340000	0.711337	-0.84068	1.55202	-	-	-	-	-	-
Liver-specific A compartments	1	119340000	119360000	0.909019	-0.949704	1.85872	-	-	-	-	-	-
Liver-specific A compartments	1	119360000	119380000	0.966251	-0.944979	1.91123	-	-	-	-	-	-
Liver-specific A compartments	1	119380000	119400000	0.822097	-1.07327	1.89536	-	-	-	-	-	-
Liver-specific A compartments	1	119400000	119420000	0.76399	-1.53317	2.29716	ENSSSCG00000004621	MYO5C	3.47	0.07	6.04818	2.90154e-17
Liver-specific A compartments	1	119420000	119440000	0.627212	-1.5401	2.16731	-	-	-	-	-	-
Liver-specific A compartments	1	119440000	119460000	0.644715	-1.4803	2.12501	-	-	-	-	-	-
Liver-specific A compartments	1	119460000	119480000	0.799375	-1.09867	1.89805	-	-	-	-	-	-
Liver-specific A compartments	1	119480000	119500000	0.785638	-1.34287	2.1285	ENSSSCG00000004622	GNB5	14.43	15.69	0.1494	0.52142
Liver-specific A compartments	1	119500000	119520000	0.827564	-1.22678	2.05434	-	-	-	-	-	-
Liver-specific A compartments	1	119520000	119540000	0.807496	-1.03492	1.84241	-	-	-	-	-	-
Liver-specific A compartments	1	119540000	119560000	1.12558	-0.667495	1.79307	-	-	-	-	-	-
Liver-specific A compartments	1	119560000	119580000	0.93143	-0.983146	1.91458	-	-	-	-	-	-
Liver-specific A compartments	1	119580000	119600000	0.900642	-1.38972	2.29036	ENSSSCG00000004623	Unknown	0.08	0	-	-
Liver-specific A compartments	1	119600000	119620000	0.855443	-1.70204	2.55748	-	-	-	-	-	-
Liver-specific A compartments	1	119620000	119640000	0.976554	-1.72774	2.70429	-	-	-	-	-	-
Liver-specific A compartments	1	119640000	119660000	1.19261	-1.50372	2.69633	-	-	-	-	-	-
Liver-specific A compartments	1	119660000	119680000	1.5106	-1.13355	2.64415	-	-	-	-	-	-
Liver-specific A compartments	1	119680000	119700000	1.86817	-0.413319	2.28149	-	-	-	-	-	-
Liver-specific A compartments	1	119980000	120000000	1.33035	-0.299434	1.62978	-	-	-	-	-	-
Liver-specific A compartments	1	120040000	120060000	1.23215	-0.461051	1.6932	-	-	-	-	-	-
Liver-specific A compartments	1	120060000	120080000	1.13411	-0.606899	1.74101	-	-	-	-	-	-
Liver-specific A compartments	1	120080000	120100000	0.915163	-0.788527	1.70369	-	-	-	-	-	-
Liver-specific A compartments	1	120100000	120120000	0.884494	-0.685034	1.56953	-	-	-	-	-	-
Liver-specific A compartments	1	120120000	120140000	0.947868	-0.719667	1.66753	ENSSSCG00000004630;ENSSSCG00000032517	SCG3;DMXL2	2.69;7.86	2.66;3.65	0.283677689270135;1.33266954779566	0.52006763360616;1.68314113475385e-07
Liver-specific A compartments	1	120140000	120160000	0.826001	-1.13307	1.95907	-	-	-	-	-	-
Liver-specific A compartments	1	120160000	120180000	0.683844	-1.48802	2.17186	ENSSSCG00000039810	Unknown	0	2.44	-0.718177	0.850757
Liver-specific A compartments	1	120180000	120200000	0.557897	-1.90548	2.46338	-	-	-	-	-	-
Liver-specific A compartments	1	120200000	120220000	0.482384	-2.11537	2.59775	-	-	-	-	-	-
Liver-specific A compartments	1	120860000	120880000	0.731925	-0.54343	1.27536	-	-	-	-	-	-
Liver-specific A compartments	1	121540000	121560000	1.20005	-0.505598	1.70565	-	-	-	-	-	-
Liver-specific A compartments	1	121560000	121580000	1.08539	-0.767815	1.85321	ENSSSCG00000004643	SLC27A2	45.12	0.63	6.01477	2.0441e-95
Liver-specific A compartments	1	121580000	121600000	0.792228	-0.803485	1.59571	-	-	-	-	-	-
Liver-specific A compartments	1	126100000	126120000	1.11161	-1.33795	2.44956	-	-	-	-	-	-
Liver-specific A compartments	1	126120000	126140000	1.70984	-0.608877	2.31872	ENSSSCG00000004666	SQOR	189.33	22.4	3.1415	6.66072e-41
Liver-specific A compartments	1	126400000	126420000	2.90925	-0.520482	3.42974	-	-	-	-	-	-
Liver-specific A compartments	1	126420000	126440000	2.79294	-0.782383	3.57532	-	-	-	-	-	-
Liver-specific A compartments	1	126440000	126460000	2.86766	-0.61172	3.47938	-	-	-	-	-	-
Liver-specific A compartments	1	126460000	126480000	3.13859	-0.278099	3.41669	-	-	-	-	-	-
Liver-specific A compartments	1	127340000	127360000	3.11001	-0.54234	3.65235	-	-	-	-	-	-
Liver-specific A compartments	1	127360000	127380000	3.04987	-0.739802	3.78967	-	-	-	-	-	-
Liver-specific A compartments	1	127380000	127400000	2.83417	-0.766159	3.60033	-	-	-	-	-	-
Liver-specific A compartments	1	127400000	127420000	2.70584	-0.869992	3.57584	-	-	-	-	-	-
Liver-specific A compartments	1	127420000	127440000	2.86728	-0.752131	3.61941	-	-	-	-	-	-
Liver-specific A compartments	1	127440000	127460000	2.86042	-0.689723	3.55014	-	-	-	-	-	-
Liver-specific A compartments	1	127460000	127480000	2.88632	-0.892721	3.77904	-	-	-	-	-	-
Liver-specific A compartments	1	127480000	127500000	2.92715	-0.87712	3.80427	-	-	-	-	-	-
Liver-specific A compartments	1	127500000	127520000	2.81157	-0.704195	3.51577	-	-	-	-	-	-
Liver-specific A compartments	1	127520000	127540000	2.92255	-0.874797	3.79735	-	-	-	-	-	-
Liver-specific A compartments	1	127540000	127560000	2.96891	-0.826377	3.79529	-	-	-	-	-	-
Liver-specific A compartments	1	127560000	127580000	3.08492	-0.518766	3.60369	-	-	-	-	-	-
Liver-specific A compartments	1	139880000	139900000	0.407574	-0.736319	1.14389	-	-	-	-	-	-
Liver-specific A compartments	1	143660000	143680000	1.22094	-0.318964	1.53991	-	-	-	-	-	-
Liver-specific A compartments	1	143680000	143700000	1.09933	-0.435708	1.53504	-	-	-	-	-	-
Liver-specific A compartments	1	143700000	143720000	1.25678	-0.396165	1.65295	ENSSSCG00000004843	TRPM1	0.09	0.01	-	-
Liver-specific A compartments	1	143720000	143740000	1.40125	-0.45526	1.85651	-	-	-	-	-	-
Liver-specific A compartments	1	143740000	143760000	1.73398	-0.430344	2.16432	-	-	-	-	-	-
Liver-specific A compartments	1	143760000	143780000	1.43834	-0.415203	1.85355	-	-	-	-	-	-
Liver-specific A compartments	1	143780000	143800000	1.32733	-0.424551	1.75189	-	-	-	-	-	-
Liver-specific A compartments	1	144020000	144040000	1.09468	-0.524998	1.61968	-	-	-	-	-	-
Liver-specific A compartments	1	144040000	144060000	0.881732	-0.832223	1.71396	-	-	-	-	-	-
Liver-specific A compartments	1	144060000	144080000	0.479458	-1.0645	1.54395	ENSSSCG00000004849	APBA2	0.07	0.12	-	-
Liver-specific A compartments	1	145180000	145200000	0.833318	-0.849226	1.68254	ENSSSCG00000004854	TJP1	36.7	77.05	-0.950465	2.17405e-07
Liver-specific A compartments	1	145200000	145220000	0.729369	-1.08038	1.80975	ENSSSCG00000033540	Unknown	0.22	0.05	-	-
Liver-specific A compartments	1	145220000	145240000	0.781087	-1.16885	1.94994	-	-	-	-	-	-
Liver-specific A compartments	1	145240000	145260000	0.743913	-1.03377	1.77768	-	-	-	-	-	-
Liver-specific A compartments	1	145260000	145280000	0.955269	-0.634816	1.59008	-	-	-	-	-	-
Liver-specific A compartments	1	145280000	145300000	1.52303	-0.423292	1.94632	-	-	-	-	-	-
Liver-specific A compartments	1	146360000	146380000	0.918074	-0.392456	1.31053	-	-	-	-	-	-
Liver-specific A compartments	1	146380000	146400000	0.964235	-0.692809	1.65704	-	-	-	-	-	-
Liver-specific A compartments	1	146400000	146420000	0.744137	-1.01721	1.76134	-	-	-	-	-	-
Liver-specific A compartments	1	147320000	147340000	0.285292	-1.50222	1.78751	-	-	-	-	-	-
Liver-specific A compartments	1	147340000	147360000	0.297896	-1.18451	1.48241	-	-	-	-	-	-
Liver-specific A compartments	1	147360000	147380000	0.415704	-0.961943	1.37765	-	-	-	-	-	-
Liver-specific A compartments	1	147380000	147400000	0.456118	-1.07509	1.53121	-	-	-	-	-	-
Liver-specific A compartments	1	147400000	147420000	0.572963	-0.805649	1.37861	-	-	-	-	-	-
Liver-specific A compartments	1	147420000	147440000	0.714217	-0.466273	1.18049	-	-	-	-	-	-
Liver-specific A compartments	1	147440000	147460000	0.717998	-0.450454	1.16845	-	-	-	-	-	-
Liver-specific A compartments	1	148300000	148320000	0.528849	-0.690428	1.21928	-	-	-	-	-	-
Liver-specific A compartments	1	148320000	148340000	0.505398	-0.751476	1.25687	-	-	-	-	-	-
Liver-specific A compartments	1	148340000	148360000	0.449821	-0.759463	1.20928	-	-	-	-	-	-
Liver-specific A compartments	1	148360000	148380000	0.515913	-0.59793	1.11384	-	-	-	-	-	-
Liver-specific A compartments	1	148380000	148400000	0.442921	-0.619122	1.06204	-	-	-	-	-	-
Liver-specific A compartments	1	148400000	148420000	0.499776	-0.590816	1.09059	-	-	-	-	-	-
Liver-specific A compartments	1	148420000	148440000	0.546946	-0.731529	1.27847	-	-	-	-	-	-
Liver-specific A compartments	1	148440000	148460000	0.523304	-0.596368	1.11967	-	-	-	-	-	-
Liver-specific A compartments	1	148460000	148480000	0.735333	-0.676429	1.41176	-	-	-	-	-	-
Liver-specific A compartments	1	148480000	148500000	0.687525	-0.748573	1.4361	-	-	-	-	-	-
Liver-specific A compartments	1	148500000	148520000	0.697102	-0.763296	1.4604	-	-	-	-	-	-
Liver-specific A compartments	1	148520000	148540000	0.579324	-0.85909	1.43841	-	-	-	-	-	-
Liver-specific A compartments	1	148540000	148560000	0.501553	-0.873045	1.3746	-	-	-	-	-	-
Liver-specific A compartments	1	148560000	148580000	0.564643	-0.834273	1.39892	-	-	-	-	-	-
Liver-specific A compartments	1	148580000	148600000	0.606446	-0.57363	1.18008	-	-	-	-	-	-
Liver-specific A compartments	1	148600000	148620000	0.713031	-0.522262	1.23529	-	-	-	-	-	-
Liver-specific A compartments	1	148620000	148640000	0.837127	-0.521456	1.35858	-	-	-	-	-	-
Liver-specific A compartments	1	159440000	159460000	0.591053	-0.294452	0.885504	-	-	-	-	-	-
Liver-specific A compartments	1	159460000	159480000	0.570706	-0.367406	0.938112	-	-	-	-	-	-
Liver-specific A compartments	1	159480000	159500000	0.544799	-0.369738	0.914537	-	-	-	-	-	-
Liver-specific A compartments	1	159620000	159640000	1.33087	-0.367738	1.69861	-	-	-	-	-	-
Liver-specific A compartments	1	159640000	159660000	1.42261	-0.623193	2.0458	-	-	-	-	-	-
Liver-specific A compartments	1	159660000	159680000	1.3479	-0.445781	1.79368	-	-	-	-	-	-
Liver-specific A compartments	1	159680000	159700000	1.3154	-0.856987	2.17239	-	-	-	-	-	-
Liver-specific A compartments	1	159700000	159720000	1.19863	-0.873913	2.07254	-	-	-	-	-	-
Liver-specific A compartments	1	159720000	159740000	1.36745	-0.861846	2.22929	-	-	-	-	-	-
Liver-specific A compartments	1	159740000	159760000	0.985608	-0.756731	1.74234	-	-	-	-	-	-
Liver-specific A compartments	1	159760000	159780000	0.662371	-0.512626	1.175	-	-	-	-	-	-
Liver-specific A compartments	1	180760000	180780000	2.69078	-0.472783	3.16357	-	-	-	-	-	-
Liver-specific A compartments	1	180780000	180800000	2.53687	-0.470796	3.00767	-	-	-	-	-	-
Liver-specific A compartments	1	180800000	180820000	2.65517	-0.291508	2.94668	-	-	-	-	-	-
Liver-specific A compartments	1	180840000	180860000	2.3378	-0.327669	2.66546	-	-	-	-	-	-
Liver-specific A compartments	1	180860000	180880000	2.30973	-0.328684	2.63841	ENSSSCG00000046029	Unknown	0	0	-	-
Liver-specific A compartments	1	182900000	182920000	0.627966	-0.276927	0.904893	-	-	-	-	-	-
Liver-specific A compartments	1	182920000	182940000	0.557218	-0.283356	0.840573	-	-	-	-	-	-
Liver-specific A compartments	1	182940000	182960000	0.525779	-0.473038	0.998818	-	-	-	-	-	-
Liver-specific A compartments	1	182960000	182980000	0.50333	-0.647896	1.15123	-	-	-	-	-	-
Liver-specific A compartments	1	182980000	183000000	0.539673	-0.611197	1.15087	-	-	-	-	-	-
Liver-specific A compartments	1	183000000	183020000	0.59443	-0.566653	1.16108	-	-	-	-	-	-
Liver-specific A compartments	1	183020000	183040000	0.65182	-0.41743	1.06925	-	-	-	-	-	-
Liver-specific A compartments	1	183040000	183060000	0.690979	-0.222611	0.91359	-	-	-	-	-	-
Liver-specific A compartments	1	183060000	183080000	0.578698	-0.705535	1.28423	-	-	-	-	-	-
Liver-specific A compartments	1	183080000	183100000	0.581087	-0.615977	1.19706	-	-	-	-	-	-
Liver-specific A compartments	1	183100000	183120000	0.516602	-0.735779	1.25238	-	-	-	-	-	-
Liver-specific A compartments	1	183120000	183140000	0.407175	-0.720735	1.12791	-	-	-	-	-	-
Liver-specific A compartments	1	183140000	183160000	0.309552	-0.807135	1.11669	-	-	-	-	-	-
Liver-specific A compartments	1	183200000	183220000	0.374379	-0.909086	1.28346	-	-	-	-	-	-
Liver-specific A compartments	1	183220000	183240000	0.408182	-0.857517	1.2657	-	-	-	-	-	-
Liver-specific A compartments	1	183240000	183260000	0.336045	-0.829459	1.1655	-	-	-	-	-	-
Liver-specific A compartments	1	183260000	183280000	0.368294	-0.71319	1.08148	-	-	-	-	-	-
Liver-specific A compartments	1	183280000	183300000	0.589366	-0.547575	1.13694	-	-	-	-	-	-
Liver-specific A compartments	1	183300000	183320000	0.658399	-0.560939	1.21934	-	-	-	-	-	-
Liver-specific A compartments	1	183320000	183340000	0.848146	-0.398088	1.24623	-	-	-	-	-	-
Liver-specific A compartments	1	183480000	183500000	0.885521	-0.294996	1.18052	-	-	-	-	-	-
Liver-specific A compartments	1	183520000	183540000	0.775173	-0.478391	1.25356	-	-	-	-	-	-
Liver-specific A compartments	1	183540000	183560000	0.933721	-0.502231	1.43595	-	-	-	-	-	-
Liver-specific A compartments	1	183560000	183580000	1.11216	-0.400415	1.51258	-	-	-	-	-	-
Liver-specific A compartments	1	185520000	185540000	1.80882	-0.471143	2.27996	-	-	-	-	-	-
Liver-specific A compartments	1	185540000	185560000	1.68243	-0.701086	2.38352	-	-	-	-	-	-
Liver-specific A compartments	1	185560000	185580000	1.68282	-0.951562	2.63438	-	-	-	-	-	-
Liver-specific A compartments	1	185580000	185600000	1.26111	-1.03287	2.29398	-	-	-	-	-	-
Liver-specific A compartments	1	185600000	185620000	1.24247	-1.14086	2.38332	-	-	-	-	-	-
Liver-specific A compartments	1	185620000	185640000	1.33191	-0.95327	2.28518	-	-	-	-	-	-
Liver-specific A compartments	1	185640000	185660000	1.52333	-0.448915	1.97225	-	-	-	-	-	-
Liver-specific A compartments	1	185660000	185680000	1.59284	-0.249843	1.84268	-	-	-	-	-	-
Liver-specific A compartments	1	185680000	185700000	1.72118	-0.129592	1.85077	-	-	-	-	-	-
Liver-specific A compartments	1	185740000	185760000	1.36833	-0.50432	1.87265	-	-	-	-	-	-
Liver-specific A compartments	1	185760000	185780000	1.29651	-0.666258	1.96276	ENSSSCG00000045820	Unknown	0.12	2.5	-5.08421	0.0101012
Liver-specific A compartments	1	185780000	185800000	1.22504	-0.657433	1.88248	-	-	-	-	-	-
Liver-specific A compartments	1	185860000	185880000	1.09318	-0.52892	1.6221	-	-	-	-	-	-
Liver-specific A compartments	1	185880000	185900000	0.820666	-1.10675	1.92742	-	-	-	-	-	-
Liver-specific A compartments	1	185900000	185920000	0.366899	-1.889	2.2559	-	-	-	-	-	-
Liver-specific A compartments	1	186340000	186360000	0.523338	-1.1824	1.70574	-	-	-	-	-	-
Liver-specific A compartments	1	186460000	186480000	0.961114	-0.416169	1.37728	-	-	-	-	-	-
Liver-specific A compartments	1	186480000	186500000	0.775247	-0.484523	1.25977	-	-	-	-	-	-
Liver-specific A compartments	1	186560000	186580000	0.751168	-0.845518	1.59669	-	-	-	-	-	-
Liver-specific A compartments	1	186580000	186600000	0.405576	-1.54385	1.94942	-	-	-	-	-	-
Liver-specific A compartments	1	187600000	187620000	0.687866	-0.220944	0.908811	-	-	-	-	-	-
Liver-specific A compartments	1	187640000	187660000	0.772738	-0.464906	1.23764	-	-	-	-	-	-
Liver-specific A compartments	1	187660000	187680000	0.87622	-0.345871	1.22209	ENSSSCG00000044073	Unknown	0.05	0.17	-	-
Liver-specific A compartments	1	190760000	190780000	0.827868	-0.659752	1.48762	-	-	-	-	-	-
Liver-specific A compartments	1	190780000	190800000	0.702544	-1.31332	2.01586	-	-	-	-	-	-
Liver-specific A compartments	1	190800000	190820000	0.517775	-1.99651	2.51429	-	-	-	-	-	-
Liver-specific A compartments	1	191140000	191160000	0.796455	-1.07883	1.87529	ENSSSCG00000049674	Unknown	0.81	0.35	1.26125	0.00176589
Liver-specific A compartments	1	191160000	191180000	1.11921	-0.572542	1.69176	-	-	-	-	-	-
Liver-specific A compartments	1	196000000	196020000	0.474119	-2.07488	2.549	-	-	-	-	-	-
Liver-specific A compartments	1	196020000	196040000	0.854531	-1.87095	2.72548	-	-	-	-	-	-
Liver-specific A compartments	1	196040000	196060000	0.963025	-1.40615	2.36918	ENSSSCG00000005122	TEK	142.35	44.11	1.73619	3.72378e-09
Liver-specific A compartments	1	196060000	196080000	0.897492	-1.58544	2.48293	-	-	-	-	-	-
Liver-specific A compartments	1	196080000	196100000	1.10444	-0.952099	2.05654	-	-	-	-	-	-
Liver-specific A compartments	1	215180000	215200000	0.497768	-0.283251	0.781019	-	-	-	-	-	-
Liver-specific A compartments	1	215200000	215220000	0.559969	-0.290867	0.850835	-	-	-	-	-	-
Liver-specific A compartments	1	215220000	215240000	0.629176	-0.299798	0.928973	-	-	-	-	-	-
Liver-specific A compartments	1	215260000	215280000	0.691269	-0.294802	0.986071	-	-	-	-	-	-
Liver-specific A compartments	1	215520000	215540000	1.78446	-0.405641	2.1901	ENSSSCG00000047663	Unknown	2.71	6.85	-1.1644	1.88577e-10
Liver-specific A compartments	1	215540000	215560000	1.69177	-0.573511	2.26528	-	-	-	-	-	-
Liver-specific A compartments	1	215560000	215580000	2.03597	-0.315257	2.35123	-	-	-	-	-	-
Liver-specific A compartments	1	215580000	215600000	2.07428	-0.777128	2.85141	-	-	-	-	-	-
Liver-specific A compartments	1	215600000	215620000	2.07793	-1.03242	3.11036	ENSSSCG00000005199	GLDC	178.5	2.04	6.50781	6.55451e-189
Liver-specific A compartments	1	215620000	215640000	1.89456	-1.19117	3.08573	-	-	-	-	-	-
Liver-specific A compartments	1	215640000	215660000	1.86627	-1.05778	2.92405	-	-	-	-	-	-
Liver-specific A compartments	1	215660000	215680000	1.94075	-0.815003	2.75576	-	-	-	-	-	-
Liver-specific A compartments	1	215840000	215860000	1.90342	-0.678617	2.58204	ENSSSCG00000021136	TPD52L3	0.44	0.07	-	-
Liver-specific A compartments	1	215860000	215880000	1.88469	-1.28146	3.16615	-	-	-	-	-	-
Liver-specific A compartments	1	215880000	215900000	1.91168	-1.59098	3.50266	-	-	-	-	-	-
Liver-specific A compartments	1	215900000	215920000	1.91417	-1.64691	3.56108	-	-	-	-	-	-
Liver-specific A compartments	1	215920000	215940000	1.8912	-1.51725	3.40845	-	-	-	-	-	-
Liver-specific A compartments	1	215940000	215960000	1.68345	-1.90591	3.58937	ENSSSCG00000005203	IL33	102.07	19.47	2.50163	9.74043e-15
Liver-specific A compartments	1	215960000	215980000	1.58049	-2.18353	3.76402	-	-	-	-	-	-
Liver-specific A compartments	1	215980000	216000000	1.45612	-2.30483	3.76095	-	-	-	-	-	-
Liver-specific A compartments	1	216000000	216020000	1.34459	-2.41222	3.75681	-	-	-	-	-	-
Liver-specific A compartments	1	216020000	216040000	1.43276	-2.31898	3.75174	-	-	-	-	-	-
Liver-specific A compartments	1	216040000	216060000	1.60138	-2.01811	3.61949	-	-	-	-	-	-
Liver-specific A compartments	1	216060000	216080000	1.87826	-1.30733	3.1856	-	-	-	-	-	-
Liver-specific A compartments	1	216600000	216620000	2.10401	-0.604017	2.70802	-	-	-	-	-	-
Liver-specific A compartments	1	216620000	216640000	2.16927	-0.499362	2.66864	-	-	-	-	-	-
Liver-specific A compartments	1	216640000	216660000	2.18285	-0.435401	2.61825	-	-	-	-	-	-
Liver-specific A compartments	1	216800000	216820000	2.31954	-0.340506	2.66004	-	-	-	-	-	-
Liver-specific A compartments	1	216820000	216840000	2.46815	-0.415087	2.88324	-	-	-	-	-	-
Liver-specific A compartments	1	217340000	217360000	2.18251	-0.425261	2.60777	-	-	-	-	-	-
Liver-specific A compartments	1	217360000	217380000	1.95614	-0.97886	2.935	-	-	-	-	-	-
Liver-specific A compartments	1	217380000	217400000	1.50512	-1.56935	3.07447	-	-	-	-	-	-
Liver-specific A compartments	1	217400000	217420000	1.28971	-1.93824	3.22796	-	-	-	-	-	-
Liver-specific A compartments	1	217420000	217440000	1.0751	-1.98753	3.06263	-	-	-	-	-	-
Liver-specific A compartments	1	217440000	217460000	0.861986	-2.45929	3.32127	ENSSSCG00000005222	SLC1A1	13.96	0.41	5.4594	7.6795e-71
Liver-specific A compartments	1	217460000	217480000	0.697769	-2.63058	3.32835	-	-	-	-	-	-
Liver-specific A compartments	1	217480000	217500000	0.818672	-2.78781	3.60648	-	-	-	-	-	-
Liver-specific A compartments	1	217500000	217520000	0.725708	-2.55458	3.28029	-	-	-	-	-	-
Liver-specific A compartments	1	217520000	217540000	0.746125	-2.31106	3.05718	-	-	-	-	-	-
Liver-specific A compartments	1	217540000	217560000	0.990557	-2.01107	3.00163	-	-	-	-	-	-
Liver-specific A compartments	1	217560000	217580000	0.912157	-2.08551	2.99766	-	-	-	-	-	-
Liver-specific A compartments	1	217580000	217600000	0.866839	-1.62307	2.48991	-	-	-	-	-	-
Liver-specific A compartments	1	217600000	217620000	0.907187	-1.34985	2.25703	-	-	-	-	-	-
Liver-specific A compartments	1	217620000	217640000	0.968456	-1.21137	2.17983	ENSSSCG00000005224	GLIS3	5.7	4.5	0.352311	0.207089
Liver-specific A compartments	1	217640000	217660000	0.709441	-1.65575	2.36519	-	-	-	-	-	-
Liver-specific A compartments	1	217660000	217680000	0.552195	-1.86314	2.41533	-	-	-	-	-	-
Liver-specific A compartments	1	217680000	217700000	0.458926	-1.97353	2.43246	-	-	-	-	-	-
Liver-specific A compartments	1	217700000	217720000	0.423478	-1.93734	2.36081	-	-	-	-	-	-
Liver-specific A compartments	1	217720000	217740000	0.368622	-2.00177	2.3704	-	-	-	-	-	-
Liver-specific A compartments	1	217740000	217760000	0.328417	-2.06805	2.39647	-	-	-	-	-	-
Liver-specific A compartments	1	217780000	217800000	0.435106	-1.98957	2.42467	-	-	-	-	-	-
Liver-specific A compartments	1	217800000	217820000	0.243029	-2.0829	2.32593	-	-	-	-	-	-
Liver-specific A compartments	1	217920000	217940000	0.2363	-2.28065	2.51695	-	-	-	-	-	-
Liver-specific A compartments	1	217960000	217980000	0.293477	-2.05469	2.34817	-	-	-	-	-	-
Liver-specific A compartments	1	218000000	218020000	0.395665	-1.98268	2.37834	-	-	-	-	-	-
Liver-specific A compartments	1	218020000	218040000	0.559764	-1.95012	2.50988	-	-	-	-	-	-
Liver-specific A compartments	1	218040000	218060000	0.332772	-2.04379	2.37656	-	-	-	-	-	-
Liver-specific A compartments	1	218060000	218080000	0.422948	-1.921	2.34395	-	-	-	-	-	-
Liver-specific A compartments	1	218080000	218100000	0.299592	-1.85954	2.15914	-	-	-	-	-	-
Liver-specific A compartments	1	218100000	218120000	0.403673	-1.69097	2.09465	-	-	-	-	-	-
Liver-specific A compartments	1	218120000	218140000	0.406471	-1.75545	2.16192	-	-	-	-	-	-
Liver-specific A compartments	1	222140000	222160000	0.893075	-0.88824	1.78131	-	-	-	-	-	-
Liver-specific A compartments	1	224920000	224940000	1.21697	-0.298947	1.51591	-	-	-	-	-	-
Liver-specific A compartments	1	225120000	225140000	0.509206	-0.4567	0.965906	-	-	-	-	-	-
Liver-specific A compartments	1	228200000	228220000	1.26745	-0.471502	1.73895	-	-	-	-	-	-
Liver-specific A compartments	1	228220000	228240000	0.652518	-0.930554	1.58307	-	-	-	-	-	-
Liver-specific A compartments	1	229300000	229320000	0.323958	-0.555351	0.879309	-	-	-	-	-	-
Liver-specific A compartments	1	229340000	229360000	0.489124	-0.356342	0.845467	-	-	-	-	-	-
Liver-specific A compartments	1	229420000	229440000	0.470321	-0.417883	0.888204	ENSSSCG00000005277	GCNT1	8.62	6.82	0.42768	0.17312
Liver-specific A compartments	1	229440000	229460000	0.398333	-0.651055	1.04939	-	-	-	-	-	-
Liver-specific A compartments	1	229460000	229480000	0.406799	-0.692509	1.09931	-	-	-	-	-	-
Liver-specific A compartments	1	229480000	229500000	0.600245	-0.746623	1.34687	-	-	-	-	-	-
Liver-specific A compartments	1	229500000	229520000	0.663152	-0.645953	1.3091	-	-	-	-	-	-
Liver-specific A compartments	1	229520000	229540000	0.705234	-0.45991	1.16514	ENSSSCG00000047518	Unknown	0.27	0.43	-	-
Liver-specific A compartments	1	229540000	229560000	0.651713	-0.685137	1.33685	-	-	-	-	-	-
Liver-specific A compartments	1	229560000	229580000	0.729252	-0.560298	1.28955	-	-	-	-	-	-
Liver-specific A compartments	1	229580000	229600000	0.586258	-0.383966	0.970223	-	-	-	-	-	-
Liver-specific A compartments	1	229620000	229640000	0.319657	-0.298732	0.618389	-	-	-	-	-	-
Liver-specific A compartments	1	229640000	229660000	0.47607	-0.3206	0.79667	-	-	-	-	-	-
Liver-specific A compartments	1	230360000	230380000	1.23159	-0.384528	1.61611	-	-	-	-	-	-
Liver-specific A compartments	1	230380000	230400000	1.3178	-0.810088	2.12789	-	-	-	-	-	-
Liver-specific A compartments	1	230400000	230420000	1.43957	-1.01611	2.45568	-	-	-	-	-	-
Liver-specific A compartments	1	230420000	230440000	1.3216	-1.16177	2.48337	ENSSSCG00000050902	Unknown	1.12	2.01	-0.561383	0.264574
Liver-specific A compartments	1	230440000	230460000	1.45215	-1.06578	2.51793	-	-	-	-	-	-
Liver-specific A compartments	1	230460000	230480000	1.44207	-1.09209	2.53416	-	-	-	-	-	-
Liver-specific A compartments	1	230480000	230500000	1.64294	-0.806746	2.44969	-	-	-	-	-	-
Liver-specific A compartments	1	230500000	230520000	1.54598	-0.709612	2.25559	-	-	-	-	-	-
Liver-specific A compartments	1	230520000	230540000	1.55665	-0.445831	2.00249	-	-	-	-	-	-
Liver-specific A compartments	1	230540000	230560000	1.58397	-0.289206	1.87317	ENSSSCG00000005284	GNA14	26.74	0.88	5.03032	4.28966e-44
Liver-specific A compartments	1	230560000	230580000	1.66547	-0.188116	1.85359	-	-	-	-	-	-
Liver-specific A compartments	1	230920000	230940000	1.71977	-0.310787	2.03055	-	-	-	-	-	-
Liver-specific A compartments	1	230940000	230960000	1.17699	-0.920373	2.09736	ENSSSCG00000044692	Unknown	1.47	1.46	0.195695	0.581595
Liver-specific A compartments	1	230960000	230980000	1.05674	-1.25599	2.31273	-	-	-	-	-	-
Liver-specific A compartments	1	230980000	231000000	0.732648	-1.39073	2.12338	-	-	-	-	-	-
Liver-specific A compartments	1	231000000	231020000	0.50004	-1.81006	2.3101	-	-	-	-	-	-
Liver-specific A compartments	1	231020000	231040000	0.573945	-1.82235	2.3963	-	-	-	-	-	-
Liver-specific A compartments	1	231040000	231060000	0.651475	-1.46852	2.12	-	-	-	-	-	-
Liver-specific A compartments	1	231060000	231080000	0.729836	-1.00378	1.73362	-	-	-	-	-	-
Liver-specific A compartments	1	231080000	231100000	0.747397	-0.499379	1.24678	ENSSSCG00000005286	CEP78	29.87	8.7	1.86989	4.52517e-16
Liver-specific A compartments	1	231100000	231120000	0.695875	-0.563915	1.25979	-	-	-	-	-	-
Liver-specific A compartments	1	231120000	231140000	0.675021	-0.614957	1.28998	-	-	-	-	-	-
Liver-specific A compartments	1	231140000	231160000	0.915137	-0.64284	1.55798	ENSSSCG00000005287	PSAT1	209.12	111.39	0.870348	0.0507502
Liver-specific A compartments	1	231160000	231180000	0.580713	-1.25842	1.83914	-	-	-	-	-	-
Liver-specific A compartments	1	237380000	237400000	2.092	-0.313227	2.40522	-	-	-	-	-	-
Liver-specific A compartments	1	237400000	237420000	1.92279	-0.821584	2.74437	-	-	-	-	-	-
Liver-specific A compartments	1	237420000	237440000	1.78326	-1.1559	2.93916	-	-	-	-	-	-
Liver-specific A compartments	1	237440000	237460000	1.70997	-1.28638	2.99635	-	-	-	-	-	-
Liver-specific A compartments	1	237460000	237480000	1.58874	-1.4253	3.01404	-	-	-	-	-	-
Liver-specific A compartments	1	237480000	237500000	1.49914	-1.32499	2.82413	-	-	-	-	-	-
Liver-specific A compartments	1	237500000	237520000	1.47645	-1.50403	2.98048	-	-	-	-	-	-
Liver-specific A compartments	1	237520000	237540000	1.3764	-1.57	2.9464	-	-	-	-	-	-
Liver-specific A compartments	1	237540000	237560000	1.55153	-1.39868	2.95021	-	-	-	-	-	-
Liver-specific A compartments	1	237560000	237580000	1.77833	-1.13449	2.91281	-	-	-	-	-	-
Liver-specific A compartments	1	237580000	237600000	1.7766	-0.664842	2.44144	-	-	-	-	-	-
Liver-specific A compartments	1	237640000	237660000	2.23712	-0.473938	2.71105	-	-	-	-	-	-
Liver-specific A compartments	1	237660000	237680000	2.07529	-0.59355	2.66884	-	-	-	-	-	-
Liver-specific A compartments	1	237680000	237700000	2.24275	-0.631884	2.87464	-	-	-	-	-	-
Liver-specific A compartments	1	237700000	237720000	2.29384	-0.387051	2.68089	-	-	-	-	-	-
Liver-specific A compartments	1	243100000	243120000	0.73993	-0.504116	1.24405	ENSSSCG00000027974;ENSSSCG00000034239	MRPL50;ZNF189	42.37;37.49	30.19;30.7	0.559059723851088;0.464707222206999	0.0147104385384196;0.00773152470686889
Liver-specific A compartments	1	243120000	243140000	0.93075	-0.862846	1.7936	-	-	-	-	-	-
Liver-specific A compartments	1	243140000	243160000	0.607134	-0.563197	1.17033	ENSSSCG00000038300	ALDOB	9950.2	1.28	12.9121	3.44257e-105
Liver-specific A compartments	1	243160000	243180000	0.456897	-0.5455	1.0024	-	-	-	-	-	-
Liver-specific A compartments	1	243200000	243220000	0.441165	-0.648641	1.08981	-	-	-	-	-	-
Liver-specific A compartments	1	260400000	260420000	0.293606	-0.832888	1.12649	-	-	-	-	-	-
Liver-specific A compartments	1	260420000	260440000	0.518469	-0.598196	1.11667	-	-	-	-	-	-
Liver-specific A compartments	1	260440000	260460000	0.877177	-0.477299	1.35448	-	-	-	-	-	-
Liver-specific A compartments	1	260540000	260560000	2.0123	-0.3881	2.4004	-	-	-	-	-	-
Liver-specific A compartments	1	260560000	260580000	2.04799	-0.470051	2.51804	-	-	-	-	-	-
Liver-specific A compartments	2	27440000	27460000	0.727424	-0.297344	1.02477	-	-	-	-	-	-
Liver-specific A compartments	2	28060000	28080000	0.325066	-0.59981	0.924877	-	-	-	-	-	-
Liver-specific A compartments	2	40380000	40400000	2.43673	-0.737235	3.17396	-	-	-	-	-	-
Liver-specific A compartments	2	40400000	40420000	2.56897	-0.927141	3.49611	-	-	-	-	-	-
Liver-specific A compartments	2	40420000	40440000	2.47054	-0.684502	3.15505	-	-	-	-	-	-
Liver-specific A compartments	2	44480000	44500000	0.961598	-1.27145	2.23305	-	-	-	-	-	-
Liver-specific A compartments	2	44500000	44520000	1.37009	-1.13664	2.50673	-	-	-	-	-	-
Liver-specific A compartments	2	44520000	44540000	1.58142	-1.15533	2.73675	-	-	-	-	-	-
Liver-specific A compartments	2	44540000	44560000	1.73301	-1.34691	3.07992	ENSSSCG00000044539	Unknown	0.63	0.69	0.19671	0.593698
Liver-specific A compartments	2	44560000	44580000	1.88561	-1.24215	3.12775	-	-	-	-	-	-
Liver-specific A compartments	2	44580000	44600000	1.88999	-0.867132	2.75713	-	-	-	-	-	-
Liver-specific A compartments	2	44600000	44620000	1.82762	-0.365445	2.19307	ENSSSCG00000013388	PDE3B	56.9	8.5	2.7717	3.2248e-42
Liver-specific A compartments	2	44640000	44660000	2.03026	-0.614798	2.64506	ENSSSCG00000013391	AC018523.2	352.5	204.61	0.879044	0.000195995
Liver-specific A compartments	2	44660000	44680000	1.99491	-0.528502	2.52342	-	-	-	-	-	-
Liver-specific A compartments	2	44680000	44700000	1.62232	-0.614277	2.2366	-	-	-	-	-	-
Liver-specific A compartments	2	44700000	44720000	1.51245	-0.542583	2.05503	-	-	-	-	-	-
Liver-specific A compartments	2	66400000	66420000	0.935376	-0.64658	1.58196	-	-	-	-	-	-
Liver-specific A compartments	2	66420000	66440000	0.955792	-0.695356	1.65115	-	-	-	-	-	-
Liver-specific A compartments	2	70240000	70260000	1.43057	-1.02971	2.46028	-	-	-	-	-	-
Liver-specific A compartments	2	70260000	70280000	1.00458	-2.04458	3.04916	-	-	-	-	-	-
Liver-specific A compartments	2	70480000	70500000	0.625263	-2.90591	3.53117	-	-	-	-	-	-
Liver-specific A compartments	2	70500000	70520000	0.730247	-2.54777	3.27801	-	-	-	-	-	-
Liver-specific A compartments	2	70520000	70540000	0.736619	-1.78514	2.52176	-	-	-	-	-	-
Liver-specific A compartments	2	70540000	70560000	1.02876	-1.53958	2.56835	ENSSSCG00000013609	Unknown	0.03	0.16	-	-
Liver-specific A compartments	2	70560000	70580000	1.17311	-1.21171	2.38482	-	-	-	-	-	-
Liver-specific A compartments	2	70580000	70600000	1.63071	-0.563381	2.19409	-	-	-	-	-	-
Liver-specific A compartments	2	70600000	70620000	1.72711	-0.227611	1.95472	ENSSSCG00000029035	ZNF558	41.42	38.11	0.206091	0.287388
Liver-specific A compartments	2	70620000	70640000	1.60606	-0.611355	2.21741	ENSSSCG00000013606;ENSSSCG00000013607	OR2Z1;Unknown	0;0.03	0;0	-;-	-;-
Liver-specific A compartments	2	70640000	70660000	1.43651	-0.741266	2.17778	ENSSSCG00000013605	ACTL9	0.02	0	-	-
Liver-specific A compartments	2	70660000	70680000	1.76013	-0.520408	2.28054	-	-	-	-	-	-
Liver-specific A compartments	2	71960000	71980000	1.93078	-3.40601	5.33678	ENSSSCG00000013559	MBD3L3	0.08	0.03	-	-
Liver-specific A compartments	2	71980000	72000000	1.96468	-3.06707	5.03175	ENSSSCG00000041386	Unknown	0.07	0	-	-
Liver-specific A compartments	2	72000000	72020000	1.90196	-3.92199	5.82394	-	-	-	-	-	-
Liver-specific A compartments	2	72020000	72040000	1.65157	-3.82316	5.47473	ENSSSCG00000040926;ENSSSCG00000050658	Unknown;Unknown	0;0.07	0.08;0	-;-	-;-
Liver-specific A compartments	2	72040000	72060000	1.59535	-4.19015	5.7855	ENSSSCG00000044953	MBD3L3	0	0	-	-
Liver-specific A compartments	2	72060000	72080000	1.46979	-4.65972	6.12951	ENSSSCG00000046190	Unknown	0.07	0	-	-
Liver-specific A compartments	2	72080000	72100000	1.4621	-4.7295	6.1916	-	-	-	-	-	-
Liver-specific A compartments	2	72100000	72120000	1.6467	-4.86159	6.5083	ENSSSCG00000026402	Unknown	1.42	1.44	0.356948	0.427426
Liver-specific A compartments	2	72120000	72140000	1.58983	-4.69179	6.28161	-	-	-	-	-	-
Liver-specific A compartments	2	72140000	72160000	1.72614	-4.56397	6.29011	ENSSSCG00000050480;ENSSSCG00000050577	Unknown;Unknown	0.29;3.64	1.36;8.47	-2.3956810057777;-1.00387558742563	0.0937034508989219;0.0100274304097912
Liver-specific A compartments	2	72160000	72180000	1.60865	-4.59485	6.2035	-	-	-	-	-	-
Liver-specific A compartments	2	72180000	72200000	1.71722	-4.60184	6.31906	-	-	-	-	-	-
Liver-specific A compartments	2	72200000	72220000	1.74833	-4.55612	6.30446	ENSSSCG00000040016	Unknown	42.26	4.93	3.24862	1.27618e-16
Liver-specific A compartments	2	72220000	72240000	1.7748	-4.45838	6.23318	-	-	-	-	-	-
Liver-specific A compartments	2	72240000	72260000	2.03189	-4.26512	6.29701	-	-	-	-	-	-
Liver-specific A compartments	2	72260000	72280000	1.43831	-2.76561	4.20392	-	-	-	-	-	-
Liver-specific A compartments	2	72280000	72300000	2.25017	-3.1177	5.36787	-	-	-	-	-	-
Liver-specific A compartments	2	72300000	72320000	2.52185	-2.38551	4.90736	ENSSSCG00000013556	ADGRE1	51.89	5.19	3.39938	9.09932e-14
Liver-specific A compartments	2	72320000	72340000	2.62388	-1.56951	4.19339	-	-	-	-	-	-
Liver-specific A compartments	2	72340000	72360000	2.92581	-0.830333	3.75615	-	-	-	-	-	-
Liver-specific A compartments	2	72500000	72520000	3.09698	-0.332667	3.42965	ENSSSCG00000024275	Unknown	0.3	0.09	-	-
Liver-specific A compartments	2	72520000	72540000	3.05175	-0.483167	3.53491	ENSSSCG00000031115	CD70	0.68	1.15	-0.686797	0.0794907
Liver-specific A compartments	2	72540000	72560000	3.01148	-0.430752	3.44223	-	-	-	-	-	-
Liver-specific A compartments	2	81780000	81800000	2.95325	-0.688536	3.64179	-	-	-	-	-	-
Liver-specific A compartments	2	81800000	81820000	2.98511	-1.01583	4.00095	ENSSSCG00000033682	CPLX2	0.11	0.17	-	-
Liver-specific A compartments	2	81820000	81840000	2.83182	-0.83457	3.66639	-	-	-	-	-	-
Liver-specific A compartments	2	81840000	81860000	2.84511	-0.868597	3.71371	-	-	-	-	-	-
Liver-specific A compartments	2	82240000	82260000	2.47835	-0.607662	3.08601	-	-	-	-	-	-
Liver-specific A compartments	2	82260000	82280000	2.47833	-1.27709	3.75543	-	-	-	-	-	-
Liver-specific A compartments	2	82280000	82300000	2.46335	-1.49542	3.95877	ENSSSCG00000014066	TMEM171	13.05	0.11	8.01059	9.6613e-18
Liver-specific A compartments	2	82300000	82320000	2.25091	-1.69647	3.94738	-	-	-	-	-	-
Liver-specific A compartments	2	82320000	82340000	2.20545	-1.88795	4.0934	ENSSSCG00000014067	TMEM174	3.08	0	7.08938	1.48099e-07
Liver-specific A compartments	2	82340000	82360000	2.11403	-1.70767	3.82171	-	-	-	-	-	-
Liver-specific A compartments	2	82360000	82380000	1.96055	-1.53324	3.49379	-	-	-	-	-	-
Liver-specific A compartments	2	82380000	82400000	1.96413	-1.55519	3.51931	-	-	-	-	-	-
Liver-specific A compartments	2	82400000	82420000	1.89951	-1.65234	3.55186	-	-	-	-	-	-
Liver-specific A compartments	2	82420000	82440000	1.99695	-1.22723	3.22418	-	-	-	-	-	-
Liver-specific A compartments	2	82440000	82460000	1.69315	-1.1208	2.81394	-	-	-	-	-	-
Liver-specific A compartments	2	82460000	82480000	1.67187	-1.14055	2.81242	-	-	-	-	-	-
Liver-specific A compartments	2	82480000	82500000	1.68558	-1.26257	2.94815	-	-	-	-	-	-
Liver-specific A compartments	2	82500000	82520000	1.64344	-1.4935	3.13694	-	-	-	-	-	-
Liver-specific A compartments	2	82520000	82540000	1.59202	-1.51159	3.10361	-	-	-	-	-	-
Liver-specific A compartments	2	82540000	82560000	1.61586	-1.34346	2.95932	-	-	-	-	-	-
Liver-specific A compartments	2	82560000	82580000	1.81788	-0.961693	2.77958	-	-	-	-	-	-
Liver-specific A compartments	2	82580000	82600000	1.96458	-0.504213	2.46879	-	-	-	-	-	-
Liver-specific A compartments	2	82740000	82760000	1.51556	-0.553505	2.06907	-	-	-	-	-	-
Liver-specific A compartments	2	82760000	82780000	1.4379	-0.750735	2.18864	ENSSSCG00000028317	ARHGEF28	6.36	7.59	-0.102456	0.549657
Liver-specific A compartments	2	82780000	82800000	1.08605	-1.09973	2.18578	-	-	-	-	-	-
Liver-specific A compartments	2	82800000	82820000	0.800224	-1.46801	2.26823	-	-	-	-	-	-
Liver-specific A compartments	2	82820000	82840000	0.861374	-1.65302	2.51439	-	-	-	-	-	-
Liver-specific A compartments	2	82840000	82860000	0.847707	-1.41753	2.26524	-	-	-	-	-	-
Liver-specific A compartments	2	82860000	82880000	0.889355	-1.60814	2.49749	-	-	-	-	-	-
Liver-specific A compartments	2	82880000	82900000	0.778217	-1.66677	2.44498	-	-	-	-	-	-
Liver-specific A compartments	2	82900000	82920000	1.02038	-1.36401	2.38439	-	-	-	-	-	-
Liver-specific A compartments	2	82920000	82940000	1.03327	-1.15104	2.1843	-	-	-	-	-	-
Liver-specific A compartments	2	82940000	82960000	1.15109	-1.00713	2.15823	-	-	-	-	-	-
Liver-specific A compartments	2	82960000	82980000	1.16856	-1.20845	2.37702	-	-	-	-	-	-
Liver-specific A compartments	2	82980000	83000000	0.911785	-1.24495	2.15673	-	-	-	-	-	-
Liver-specific A compartments	2	83000000	83020000	0.969232	-1.13191	2.10114	-	-	-	-	-	-
Liver-specific A compartments	2	83020000	83040000	0.964785	-0.939355	1.90414	-	-	-	-	-	-
Liver-specific A compartments	2	83800000	83820000	1.37579	-0.583944	1.95973	-	-	-	-	-	-
Liver-specific A compartments	2	83820000	83840000	1.34016	-0.457583	1.79774	-	-	-	-	-	-
Liver-specific A compartments	2	83840000	83860000	1.37303	-0.594714	1.96775	ENSSSCG00000014074;ENSSSCG00000014075	GFM2;NSA2	54.01;195.48	61.74;297.95	-0.0715855146387911;-0.417666592131531	0.667172824955493;0.0342879442210775
Liver-specific A compartments	2	83860000	83880000	0.952325	-1.41666	2.36899	-	-	-	-	-	-
Liver-specific A compartments	2	83880000	83900000	0.705158	-1.82732	2.53247	-	-	-	-	-	-
Liver-specific A compartments	2	83900000	83920000	0.616335	-2.04246	2.6588	-	-	-	-	-	-
Liver-specific A compartments	2	83920000	83940000	0.498766	-2.4181	2.91686	ENSSSCG00000014076	FAM169A	16.46	5.14	1.9108	4.58069e-13
Liver-specific A compartments	2	83940000	83960000	0.381916	-2.60586	2.98778	-	-	-	-	-	-
Liver-specific A compartments	2	84020000	84040000	0.230502	-3.25608	3.48658	-	-	-	-	-	-
Liver-specific A compartments	2	84060000	84080000	0.441975	-3.22542	3.6674	-	-	-	-	-	-
Liver-specific A compartments	2	84080000	84100000	0.415967	-2.96614	3.38211	-	-	-	-	-	-
Liver-specific A compartments	2	84120000	84140000	0.358044	-2.68754	3.04559	ENSSSCG00000029710	GCNT4	1.21	1.67	-0.233991	0.341531
Liver-specific A compartments	2	84280000	84300000	0.476885	-3.37123	3.84811	-	-	-	-	-	-
Liver-specific A compartments	2	84300000	84320000	0.807207	-2.52407	3.33127	-	-	-	-	-	-
Liver-specific A compartments	2	84320000	84340000	1.26527	-2.00745	3.27272	ENSSSCG00000014079	ANKRD31	4.24	0.23	4.59413	3.96835e-33
Liver-specific A compartments	2	84340000	84360000	1.24496	-1.71131	2.95627	-	-	-	-	-	-
Liver-specific A compartments	2	84360000	84380000	1.47364	-0.970338	2.44398	-	-	-	-	-	-
Liver-specific A compartments	2	84720000	84740000	1.32595	-0.638338	1.96428	ENSSSCG00000014084	POC5	19.86	14.25	0.571326	0.000335366
Liver-specific A compartments	2	84740000	84760000	0.895428	-2.0088	2.90423	-	-	-	-	-	-
Liver-specific A compartments	2	84760000	84780000	0.565039	-3.00384	3.56888	-	-	-	-	-	-
Liver-specific A compartments	2	84780000	84800000	0.434887	-3.58951	4.0244	-	-	-	-	-	-
Liver-specific A compartments	2	85080000	85100000	0.407143	-3.73555	4.14269	-	-	-	-	-	-
Liver-specific A compartments	2	85100000	85120000	0.529895	-3.57432	4.10422	-	-	-	-	-	-
Liver-specific A compartments	2	85120000	85140000	0.607266	-3.60249	4.20976	-	-	-	-	-	-
Liver-specific A compartments	2	85140000	85160000	0.723185	-3.6114	4.33458	-	-	-	-	-	-
Liver-specific A compartments	2	85160000	85180000	0.893928	-3.17436	4.06829	-	-	-	-	-	-
Liver-specific A compartments	2	85180000	85200000	1.11738	-3.18075	4.29813	-	-	-	-	-	-
Liver-specific A compartments	2	85200000	85220000	1.35524	-3.02801	4.38325	-	-	-	-	-	-
Liver-specific A compartments	2	85220000	85240000	1.72643	-2.52127	4.24771	-	-	-	-	-	-
Liver-specific A compartments	2	85240000	85260000	1.8404	-2.29461	4.13501	-	-	-	-	-	-
Liver-specific A compartments	2	85260000	85280000	2.12214	-2.10926	4.2314	-	-	-	-	-	-
Liver-specific A compartments	2	85280000	85300000	2.14926	-1.55408	3.70335	ENSSSCG00000014088	IQGAP2	289.27	20.46	3.87935	8.48714e-59
Liver-specific A compartments	2	85300000	85320000	2.25463	-1.65054	3.90516	-	-	-	-	-	-
Liver-specific A compartments	2	85320000	85340000	2.16442	-1.61	3.77442	-	-	-	-	-	-
Liver-specific A compartments	2	85340000	85360000	2.50818	-1.49378	4.00196	-	-	-	-	-	-
Liver-specific A compartments	2	85360000	85380000	2.34679	-1.60712	3.9539	-	-	-	-	-	-
Liver-specific A compartments	2	85380000	85400000	2.26848	-1.39025	3.65872	-	-	-	-	-	-
Liver-specific A compartments	2	85400000	85420000	2.16029	-1.34624	3.50653	-	-	-	-	-	-
Liver-specific A compartments	2	85420000	85440000	2.08217	-1.5525	3.63467	-	-	-	-	-	-
Liver-specific A compartments	2	85440000	85460000	2.02008	-1.54321	3.56329	-	-	-	-	-	-
Liver-specific A compartments	2	85460000	85480000	2.02134	-1.56574	3.58708	-	-	-	-	-	-
Liver-specific A compartments	2	85480000	85500000	2.04335	-1.53439	3.57774	-	-	-	-	-	-
Liver-specific A compartments	2	85500000	85520000	2.09152	-1.24813	3.33964	-	-	-	-	-	-
Liver-specific A compartments	2	85520000	85540000	2.23501	-0.816332	3.05134	-	-	-	-	-	-
Liver-specific A compartments	2	85540000	85560000	2.32819	-0.63852	2.96671	ENSSSCG00000037582	F2RL2	1.87	110.45	-5.38793	1.5499e-22
Liver-specific A compartments	2	85560000	85580000	2.25159	-0.711422	2.96301	-	-	-	-	-	-
Liver-specific A compartments	2	85580000	85600000	2.19602	-1.00796	3.20399	-	-	-	-	-	-
Liver-specific A compartments	2	85600000	85620000	2.23137	-1.05374	3.28512	-	-	-	-	-	-
Liver-specific A compartments	2	85620000	85640000	2.25113	-1.14523	3.39637	-	-	-	-	-	-
Liver-specific A compartments	2	85640000	85660000	2.11546	-1.18997	3.30543	ENSSSCG00000035355	F2R	19.52	20.75	-0.116001	0.670321
Liver-specific A compartments	2	85660000	85680000	1.97725	-1.62953	3.60678	-	-	-	-	-	-
Liver-specific A compartments	2	85680000	85700000	1.86356	-2.05524	3.9188	-	-	-	-	-	-
Liver-specific A compartments	2	85700000	85720000	1.68226	-1.85096	3.53322	ENSSSCG00000046695	Unknown	2.34	3.17	-0.243809	0.479085
Liver-specific A compartments	2	85720000	85740000	1.64693	-2.03307	3.68	ENSSSCG00000014091	F2RL1	0.97	1.21	-0.0168199	0.952363
Liver-specific A compartments	2	85740000	85760000	1.51667	-1.93199	3.44866	-	-	-	-	-	-
Liver-specific A compartments	2	85760000	85780000	1.42587	-2.09457	3.52044	ENSSSCG00000014092	S100Z	1.79	0.68	1.72845	0.00245908
Liver-specific A compartments	2	85780000	85800000	1.42129	-2.57032	3.99161	-	-	-	-	-	-
Liver-specific A compartments	2	85800000	85820000	1.46188	-2.75484	4.21672	ENSSSCG00000014093	CRHBP	0.47	0.46	-	-
Liver-specific A compartments	2	85820000	85840000	1.4851	-2.44001	3.9251	-	-	-	-	-	-
Liver-specific A compartments	2	85840000	85860000	1.67087	-2.17078	3.84165	-	-	-	-	-	-
Liver-specific A compartments	2	85860000	85880000	1.79205	-1.69409	3.48614	-	-	-	-	-	-
Liver-specific A compartments	2	85880000	85900000	2.4023	-0.726866	3.12917	ENSSSCG00000014094;ENSSSCG00000050058	AC008581.2;Unknown	83.39;0.91	61.26;1.64	0.49490637217383;-0.680749262004502	0.0378102258882062;0.0658306978995333
Liver-specific A compartments	2	85900000	85920000	2.28541	-0.639577	2.92499	-	-	-	-	-	-
Liver-specific A compartments	2	85920000	85940000	2.2262	-0.751922	2.97812	-	-	-	-	-	-
Liver-specific A compartments	2	85940000	85960000	2.25088	-1.11694	3.36782	ENSSSCG00000014097;ENSSSCG00000041248	PDE8B;ZBED3	10.06;8.49	1.67;1.43	2.64157134488685;2.58100176808221	7.63881790049756e-25;4.56133006889765e-12
Liver-specific A compartments	2	85960000	85980000	2.19673	-1.93586	4.13259	-	-	-	-	-	-
Liver-specific A compartments	2	85980000	86000000	1.9666	-2.45236	4.41895	-	-	-	-	-	-
Liver-specific A compartments	2	86000000	86020000	1.60241	-2.58585	4.18826	-	-	-	-	-	-
Liver-specific A compartments	2	86020000	86040000	1.79394	-2.83671	4.63065	-	-	-	-	-	-
Liver-specific A compartments	2	86040000	86060000	1.62712	-3.21844	4.84556	-	-	-	-	-	-
Liver-specific A compartments	2	86060000	86080000	1.45231	-3.35059	4.8029	-	-	-	-	-	-
Liver-specific A compartments	2	86080000	86100000	1.48549	-3.53172	5.0172	-	-	-	-	-	-
Liver-specific A compartments	2	86100000	86120000	1.37925	-3.60508	4.98433	-	-	-	-	-	-
Liver-specific A compartments	2	86120000	86140000	1.3812	-3.82623	5.20744	-	-	-	-	-	-
Liver-specific A compartments	2	86140000	86160000	1.40951	-3.87573	5.28524	-	-	-	-	-	-
Liver-specific A compartments	2	86160000	86180000	1.33623	-3.98113	5.31736	-	-	-	-	-	-
Liver-specific A compartments	2	86180000	86200000	1.3487	-3.91765	5.26635	-	-	-	-	-	-
Liver-specific A compartments	2	86200000	86220000	1.21461	-3.95679	5.17141	-	-	-	-	-	-
Liver-specific A compartments	2	86220000	86240000	1.15097	-4.14951	5.30048	-	-	-	-	-	-
Liver-specific A compartments	2	86240000	86260000	0.996355	-4.22499	5.22135	-	-	-	-	-	-
Liver-specific A compartments	2	86260000	86280000	0.944708	-4.09596	5.04067	-	-	-	-	-	-
Liver-specific A compartments	2	86280000	86300000	1.05148	-3.83153	4.88301	-	-	-	-	-	-
Liver-specific A compartments	2	86300000	86320000	1.21059	-3.41304	4.62364	-	-	-	-	-	-
Liver-specific A compartments	2	86320000	86340000	1.32197	-2.90745	4.22942	-	-	-	-	-	-
Liver-specific A compartments	2	86340000	86360000	1.35702	-2.67859	4.03561	-	-	-	-	-	-
Liver-specific A compartments	2	86360000	86380000	1.45931	-2.34323	3.80254	-	-	-	-	-	-
Liver-specific A compartments	2	86380000	86400000	0.899709	-3.00498	3.90469	ENSSSCG00000014098;ENSSSCG00000042360	WDR41;Unknown	90.25;1.23	56.55;2.09	0.773444367537739;-0.636550121060304	0.00393102127637745;0.0543610003864944
Liver-specific A compartments	2	86400000	86420000	0.641916	-3.74333	4.38525	-	-	-	-	-	-
Liver-specific A compartments	2	86540000	86560000	0.503474	-2.55219	3.05567	-	-	-	-	-	-
Liver-specific A compartments	2	86560000	86580000	0.654184	-2.21237	2.86655	-	-	-	-	-	-
Liver-specific A compartments	2	86580000	86600000	1.0442	-1.75325	2.79745	-	-	-	-	-	-
Liver-specific A compartments	2	86600000	86620000	1.18835	-1.33104	2.5194	-	-	-	-	-	-
Liver-specific A compartments	2	86620000	86640000	1.39805	-1.00536	2.40341	-	-	-	-	-	-
Liver-specific A compartments	2	86640000	86660000	1.54323	-0.886122	2.42936	-	-	-	-	-	-
Liver-specific A compartments	2	86660000	86680000	1.22828	-1.21795	2.44623	ENSSSCG00000014100	TBCA	261.84	74.99	1.84195	1.07419e-17
Liver-specific A compartments	2	86680000	86700000	0.788823	-2.23909	3.02792	-	-	-	-	-	-
Liver-specific A compartments	2	86700000	86720000	0.66439	-2.56187	3.22626	-	-	-	-	-	-
Liver-specific A compartments	2	86720000	86740000	0.560089	-2.7589	3.31899	-	-	-	-	-	-
Liver-specific A compartments	2	86740000	86760000	0.457712	-3.36039	3.81811	-	-	-	-	-	-
Liver-specific A compartments	2	86800000	86820000	0.509244	-3.5183	4.02754	-	-	-	-	-	-
Liver-specific A compartments	2	86820000	86840000	0.57115	-3.22816	3.79931	-	-	-	-	-	-
Liver-specific A compartments	2	86840000	86860000	0.620128	-2.68028	3.30041	-	-	-	-	-	-
Liver-specific A compartments	2	86860000	86880000	1.06277	-2.06509	3.12787	-	-	-	-	-	-
Liver-specific A compartments	2	86880000	86900000	1.3507	-1.83847	3.18917	-	-	-	-	-	-
Liver-specific A compartments	2	86900000	86920000	1.36897	-1.62028	2.98925	-	-	-	-	-	-
Liver-specific A compartments	2	86920000	86940000	1.56462	-1.54312	3.10774	-	-	-	-	-	-
Liver-specific A compartments	2	86940000	86960000	1.77821	-1.53853	3.31674	-	-	-	-	-	-
Liver-specific A compartments	2	86960000	86980000	1.83004	-1.38476	3.21479	-	-	-	-	-	-
Liver-specific A compartments	2	86980000	87000000	1.76711	-1.43627	3.20337	-	-	-	-	-	-
Liver-specific A compartments	2	87000000	87020000	1.766	-1.33734	3.10334	-	-	-	-	-	-
Liver-specific A compartments	2	87020000	87040000	1.81738	-1.23744	3.05482	-	-	-	-	-	-
Liver-specific A compartments	2	87040000	87060000	2.0685	-1.14015	3.20865	-	-	-	-	-	-
Liver-specific A compartments	2	87060000	87080000	2.09895	-1.00179	3.10074	-	-	-	-	-	-
Liver-specific A compartments	2	87080000	87100000	2.1337	-0.912319	3.04602	-	-	-	-	-	-
Liver-specific A compartments	2	87100000	87120000	2.37175	-0.619492	2.99124	-	-	-	-	-	-
Liver-specific A compartments	2	87840000	87860000	2.88638	-0.420664	3.30704	-	-	-	-	-	-
Liver-specific A compartments	2	87860000	87880000	2.80423	-0.45161	3.25584	ENSSSCG00000014108;ENSSSCG00000014110	BHMT;DMGDH	5473.15;371.96	2.11;0.77	11.4717610003312;8.85610284955818	9.80731109563865e-213;5.64246731983749e-152
Liver-specific A compartments	2	87880000	87900000	2.93045	-0.458967	3.38942	-	-	-	-	-	-
Liver-specific A compartments	2	89140000	89160000	0.560872	-0.576185	1.13706	-	-	-	-	-	-
Liver-specific A compartments	2	89160000	89180000	0.408929	-0.903349	1.31228	ENSSSCG00000014124	ANKRD34B	2.26	0.42	2.83388	6.47323e-07
Liver-specific A compartments	2	89220000	89240000	0.467532	-0.587494	1.05503	-	-	-	-	-	-
Liver-specific A compartments	2	102480000	102500000	0.581078	-0.66204	1.24312	-	-	-	-	-	-
Liver-specific A compartments	2	102600000	102620000	0.80076	-1.25659	2.05735	-	-	-	-	-	-
Liver-specific A compartments	2	102620000	102640000	0.591567	-1.89751	2.48908	-	-	-	-	-	-
Liver-specific A compartments	2	102640000	102660000	0.626189	-2.23231	2.85849	-	-	-	-	-	-
Liver-specific A compartments	2	102660000	102680000	0.605956	-2.28961	2.89557	-	-	-	-	-	-
Liver-specific A compartments	2	102700000	102720000	0.49142	-2.35171	2.84313	-	-	-	-	-	-
Liver-specific A compartments	2	102740000	102760000	0.361872	-2.71682	3.0787	-	-	-	-	-	-
Liver-specific A compartments	2	102840000	102860000	0.372396	-2.734	3.10639	-	-	-	-	-	-
Liver-specific A compartments	2	102860000	102880000	0.456291	-2.39438	2.85067	-	-	-	-	-	-
Liver-specific A compartments	2	102880000	102900000	0.451327	-2.50352	2.95485	-	-	-	-	-	-
Liver-specific A compartments	2	117160000	117180000	0.979031	-0.531416	1.51045	-	-	-	-	-	-
Liver-specific A compartments	2	117180000	117200000	0.60646	-0.918757	1.52522	-	-	-	-	-	-
Liver-specific A compartments	2	117200000	117220000	0.597099	-1.02336	1.62046	-	-	-	-	-	-
Liver-specific A compartments	2	117220000	117240000	0.410011	-0.923	1.33301	ENSSSCG00000029860	EPB41L4A	23.53	11.44	1.10309	4.81098e-07
Liver-specific A compartments	2	117240000	117260000	0.535042	-1.25642	1.79146	-	-	-	-	-	-
Liver-specific A compartments	2	117280000	117300000	0.452526	-1.43754	1.89006	-	-	-	-	-	-
Liver-specific A compartments	2	117460000	117480000	0.533984	-0.241666	0.77565	-	-	-	-	-	-
Liver-specific A compartments	2	126320000	126340000	0.555365	-0.410572	0.965937	-	-	-	-	-	-
Liver-specific A compartments	2	126340000	126360000	0.636164	-0.331729	0.967893	ENSSSCG00000039373	SNX24	122.25	24.27	2.26873	5.10457e-20
Liver-specific A compartments	3	6580000	6600000	1.60255	-0.479931	2.08248	-	-	-	-	-	-
Liver-specific A compartments	3	6600000	6620000	1.37466	-1.47219	2.84685	ENSSSCG00000023320	CYP3A29	116.32	2.92	5.28151	3.66928e-42
Liver-specific A compartments	3	6620000	6640000	0.95337	-2.16234	3.11571	-	-	-	-	-	-
Liver-specific A compartments	3	6640000	6660000	0.968555	-2.66592	3.63448	-	-	-	-	-	-
Liver-specific A compartments	3	7240000	7260000	3.433	-0.949684	4.38268	-	-	-	-	-	-
Liver-specific A compartments	3	7260000	7280000	2.98097	-1.6398	4.62077	-	-	-	-	-	-
Liver-specific A compartments	3	7280000	7300000	2.77545	-1.96359	4.73904	-	-	-	-	-	-
Liver-specific A compartments	3	7300000	7320000	2.57101	-2.2462	4.81721	-	-	-	-	-	-
Liver-specific A compartments	3	7320000	7340000	2.59024	-2.49763	5.08788	-	-	-	-	-	-
Liver-specific A compartments	3	7340000	7360000	2.57481	-2.60017	5.17498	-	-	-	-	-	-
Liver-specific A compartments	3	7360000	7380000	2.71295	-2.44118	5.15412	-	-	-	-	-	-
Liver-specific A compartments	3	7380000	7400000	3.07614	-1.35882	4.43495	ENSSSCG00000032956	BMERB1	1.21	1.99	-0.647918	0.015629
Liver-specific A compartments	3	7400000	7420000	3.3184	-1.4138	4.73219	ENSSSCG00000039119	PDXDC1	151.24	67.06	1.18704	5.24686e-19
Liver-specific A compartments	3	7420000	7440000	3.92986	-0.781069	4.71092	-	-	-	-	-	-
Liver-specific A compartments	3	7780000	7800000	1.50825	-1.74848	3.25674	-	-	-	-	-	-
Liver-specific A compartments	3	7800000	7820000	2.36903	-0.359455	2.72849	ENSSSCG00000046661	OR2AE1	0.03	0	-	-
Liver-specific A compartments	3	22520000	22540000	0.617682	-0.5915	1.20918	-	-	-	-	-	-
Liver-specific A compartments	3	22820000	22840000	0.737273	-0.277185	1.01446	-	-	-	-	-	-
Liver-specific A compartments	3	22840000	22860000	0.714698	-0.568052	1.28275	-	-	-	-	-	-
Liver-specific A compartments	3	22860000	22880000	0.432942	-0.979001	1.41194	-	-	-	-	-	-
Liver-specific A compartments	3	22880000	22900000	0.54419	-1.20419	1.74838	-	-	-	-	-	-
Liver-specific A compartments	3	22900000	22920000	0.440883	-1.36391	1.8048	ENSSSCG00000028923	SCNN1B	0.22	0.06	-	-
Liver-specific A compartments	3	23000000	23020000	0.55146	-0.647923	1.19938	ENSSSCG00000007836	SCNN1G	0.04	0.04	-	-
Liver-specific A compartments	3	23080000	23100000	0.538787	-0.331263	0.87005	-	-	-	-	-	-
Liver-specific A compartments	3	23660000	23680000	0.661396	-0.94987	1.61127	ENSSSCG00000007838;ENSSSCG00000027967	OTOA;IGSF6	0.09;15.76	0.09;2.14	-;3.07927815183277	-;8.76318752537735e-14
Liver-specific A compartments	3	23680000	23700000	0.881966	-0.394602	1.27657	-	-	-	-	-	-
Liver-specific A compartments	3	23740000	23760000	0.586845	-0.897474	1.48432	-	-	-	-	-	-
Liver-specific A compartments	3	23760000	23780000	0.845511	-0.508706	1.35422	-	-	-	-	-	-
Liver-specific A compartments	3	23820000	23840000	0.916793	-0.240553	1.15735	-	-	-	-	-	-
Liver-specific A compartments	3	25280000	25300000	0.690525	-0.493641	1.18417	ENSSSCG00000007857;ENSSSCG00000024748	ACSM3;THUMPD1	89.22;87.22	0.65;113.42	6.98823375511338;-0.210955054553249	1.56713575083399e-25;0.17252728790102
Liver-specific A compartments	3	25300000	25320000	0.648361	-1.17237	1.82073	-	-	-	-	-	-
Liver-specific A compartments	3	26820000	26840000	0.526643	-0.742896	1.26954	-	-	-	-	-	-
Liver-specific A compartments	3	28140000	28160000	0.709189	-2.25864	2.96783	-	-	-	-	-	-
Liver-specific A compartments	3	28160000	28180000	1.01767	-1.81572	2.83339	-	-	-	-	-	-
Liver-specific A compartments	3	28180000	28200000	1.50113	-0.903314	2.40445	-	-	-	-	-	-
Liver-specific A compartments	3	28200000	28220000	2.15649	-0.526679	2.68316	-	-	-	-	-	-
Liver-specific A compartments	3	33920000	33940000	1.30889	-0.323094	1.63198	-	-	-	-	-	-
Liver-specific A compartments	3	33940000	33960000	1.17348	-0.566359	1.73984	-	-	-	-	-	-
Liver-specific A compartments	3	33960000	33980000	1.20065	-0.933874	2.13452	-	-	-	-	-	-
Liver-specific A compartments	3	33980000	34000000	1.24173	-0.917867	2.1596	-	-	-	-	-	-
Liver-specific A compartments	3	34000000	34020000	1.24941	-0.541404	1.79081	ENSSSCG00000007909	ABAT	61.37	1.21	5.58252	4.72114e-81
Liver-specific A compartments	3	34020000	34040000	0.993953	-0.47924	1.47319	-	-	-	-	-	-
Liver-specific A compartments	3	34040000	34060000	0.938567	-0.393202	1.33177	ENSSSCG00000007914	METTL22	31.33	43.8	-0.561967	0.00144061
Liver-specific A compartments	3	43740000	43760000	0.580443	-1.29093	1.87137	-	-	-	-	-	-
Liver-specific A compartments	3	43760000	43780000	0.712077	-0.79743	1.50951	-	-	-	-	-	-
Liver-specific A compartments	3	43780000	43800000	0.920538	-0.661475	1.58201	ENSSSCG00000008092	NT5DC4	0.64	0.19	2.25974	0.0998565
Liver-specific A compartments	3	43800000	43820000	1.03323	-0.760317	1.79354	-	-	-	-	-	-
Liver-specific A compartments	3	43820000	43840000	1.25212	-0.488349	1.74047	-	-	-	-	-	-
Liver-specific A compartments	3	47780000	47800000	1.22943	-0.804819	2.03425	-	-	-	-	-	-
Liver-specific A compartments	3	47800000	47820000	1.01907	-1.83282	2.85189	ENSSSCG00000037616	SULT1C4	0.41	0.75	-1.75087	0.170825
Liver-specific A compartments	3	47820000	47840000	0.886698	-2.41928	3.30597	ENSSSCG00000022153	SULT1C2	12.32	1.58	2.92027	1.07081e-30
Liver-specific A compartments	3	52280000	52300000	0.337428	-1.53604	1.87347	ENSSSCG00000008162	IL1R1	318.64	24.01	3.93858	9.14342e-41
Liver-specific A compartments	3	52680000	52700000	0.655099	-0.410689	1.06579	-	-	-	-	-	-
Liver-specific A compartments	3	52700000	52720000	0.5042	-0.520228	1.02443	-	-	-	-	-	-
Liver-specific A compartments	3	54980000	55000000	0.600153	-1.00883	1.60899	-	-	-	-	-	-
Liver-specific A compartments	3	55000000	55020000	0.683466	-0.881093	1.56456	ENSSSCG00000034542	LYG2	0.12	0.25	-	-
Liver-specific A compartments	3	55020000	55040000	0.827132	-0.561285	1.38842	-	-	-	-	-	-
Liver-specific A compartments	3	55220000	55240000	1.07973	-0.344987	1.42472	-	-	-	-	-	-
Liver-specific A compartments	3	55240000	55260000	0.80432	-0.901804	1.70612	-	-	-	-	-	-
Liver-specific A compartments	3	55260000	55280000	0.636899	-1.13148	1.76838	-	-	-	-	-	-
Liver-specific A compartments	3	55280000	55300000	0.599561	-1.64516	2.24472	-	-	-	-	-	-
Liver-specific A compartments	3	55300000	55320000	0.558942	-1.73944	2.29838	-	-	-	-	-	-
Liver-specific A compartments	3	55320000	55340000	0.598034	-1.40308	2.00111	-	-	-	-	-	-
Liver-specific A compartments	3	55340000	55360000	0.858885	-1.55858	2.41746	ENSSSCG00000008187	CRACDL	0.7	0.06	3.01708	1.44619e-08
Liver-specific A compartments	3	55360000	55380000	0.997002	-1.41941	2.41641	-	-	-	-	-	-
Liver-specific A compartments	3	55380000	55400000	1.06632	-1.34467	2.41099	-	-	-	-	-	-
Liver-specific A compartments	3	55400000	55420000	1.24198	-1.23638	2.47835	-	-	-	-	-	-
Liver-specific A compartments	3	55420000	55440000	1.31129	-1.05503	2.36632	-	-	-	-	-	-
Liver-specific A compartments	3	55440000	55460000	1.40263	-0.699132	2.10176	-	-	-	-	-	-
Liver-specific A compartments	3	55460000	55480000	1.67934	-0.798788	2.47813	-	-	-	-	-	-
Liver-specific A compartments	3	55480000	55500000	1.73289	-0.820939	2.55383	-	-	-	-	-	-
Liver-specific A compartments	3	55500000	55520000	1.88937	-0.672604	2.56197	-	-	-	-	-	-
Liver-specific A compartments	3	57520000	57540000	0.8208	-0.627388	1.44819	ENSSSCG00000008209	TEX37	1.55	4.13	-1.2151	0.00509102
Liver-specific A compartments	3	57540000	57560000	0.690081	-1.10013	1.79021	-	-	-	-	-	-
Liver-specific A compartments	3	57580000	57600000	0.486992	-0.937185	1.42418	ENSSSCG00000036354	FOXI3	0.03	0	-	-
Liver-specific A compartments	3	57680000	57700000	0.586267	-0.966169	1.55244	-	-	-	-	-	-
Liver-specific A compartments	3	59740000	59760000	0.672958	-0.535086	1.20804	-	-	-	-	-	-
Liver-specific A compartments	3	59760000	59780000	0.85355	-0.443246	1.2968	ENSSSCG00000008245	TMSB10	4942.07	2010.25	1.3688	2.47069e-06
Liver-specific A compartments	3	59780000	59800000	0.719759	-0.839202	1.55896	-	-	-	-	-	-
Liver-specific A compartments	3	59800000	59820000	0.389858	-1.074	1.46386	-	-	-	-	-	-
Liver-specific A compartments	3	69420000	69440000	2.87329	-0.62728	3.50057	-	-	-	-	-	-
Liver-specific A compartments	3	69440000	69460000	2.66184	-0.971543	3.63339	-	-	-	-	-	-
Liver-specific A compartments	3	69460000	69480000	2.71463	-0.664086	3.37871	-	-	-	-	-	-
Liver-specific A compartments	3	69480000	69500000	2.9367	-0.350691	3.28739	ENSSSCG00000008302;ENSSSCG00000036364	FBXO41;EGR4	0.02;0.35	0.02;0.48	-;-	-;-
Liver-specific A compartments	3	70320000	70340000	0.469442	-0.674955	1.1444	-	-	-	-	-	-
Liver-specific A compartments	3	71600000	71620000	2.21139	-0.195842	2.40723	-	-	-	-	-	-
Liver-specific A compartments	3	71640000	71660000	1.88783	-0.63477	2.5226	-	-	-	-	-	-
Liver-specific A compartments	3	71660000	71680000	1.87116	-1.13763	3.0088	ENSSSCG00000008319;ENSSSCG00000023258	CD207;CLEC4F	0.68;272.08	0.79;0.74	0.130586301667039;8.42676088680115	0.770624298075058;1.40567113540619e-22
Liver-specific A compartments	3	71680000	71700000	1.82209	-1.24857	3.07066	-	-	-	-	-	-
Liver-specific A compartments	3	71700000	71720000	1.70475	-1.50969	3.21444	ENSSSCG00000008321	FIGLA	0.14	0	-	-
Liver-specific A compartments	3	71720000	71740000	1.81772	-1.85552	3.67324	ENSSSCG00000020736	ADD2	3.16	0.52	2.60125	1.41932e-07
Liver-specific A compartments	3	71740000	71760000	1.85745	-2.11989	3.97734	-	-	-	-	-	-
Liver-specific A compartments	3	71760000	71780000	1.8229	-2.17182	3.99472	-	-	-	-	-	-
Liver-specific A compartments	3	71780000	71800000	1.76837	-2.27855	4.04692	-	-	-	-	-	-
Liver-specific A compartments	3	71800000	71820000	1.89446	-2.23626	4.13071	-	-	-	-	-	-
Liver-specific A compartments	3	71820000	71840000	1.88569	-2.14759	4.03328	-	-	-	-	-	-
Liver-specific A compartments	3	71840000	71860000	1.92089	-1.76894	3.68984	-	-	-	-	-	-
Liver-specific A compartments	3	71860000	71880000	1.94319	-1.60054	3.54373	-	-	-	-	-	-
Liver-specific A compartments	3	71880000	71900000	1.96777	-2.11811	4.08588	-	-	-	-	-	-
Liver-specific A compartments	3	71900000	71920000	1.90122	-2.36107	4.26229	-	-	-	-	-	-
Liver-specific A compartments	3	71920000	71940000	1.91378	-2.49247	4.40625	-	-	-	-	-	-
Liver-specific A compartments	3	71940000	71960000	2.00719	-2.38362	4.39082	ENSSSCG00000008326	TGFA	7.91	1.13	2.81847	6.40529e-16
Liver-specific A compartments	3	71960000	71980000	2.12416	-2.37999	4.50415	-	-	-	-	-	-
Liver-specific A compartments	3	71980000	72000000	1.96917	-2.20149	4.17066	-	-	-	-	-	-
Liver-specific A compartments	3	72000000	72020000	1.89574	-2.52646	4.4222	-	-	-	-	-	-
Liver-specific A compartments	3	72020000	72040000	1.84231	-2.26939	4.1117	-	-	-	-	-	-
Liver-specific A compartments	3	72040000	72060000	1.89114	-2.25943	4.15057	-	-	-	-	-	-
Liver-specific A compartments	3	72060000	72080000	1.90662	-2.14359	4.05021	-	-	-	-	-	-
Liver-specific A compartments	3	72080000	72100000	2.01282	-2.24096	4.25377	-	-	-	-	-	-
Liver-specific A compartments	3	72100000	72120000	2.2019	-1.98114	4.18303	-	-	-	-	-	-
Liver-specific A compartments	3	72120000	72140000	2.26923	-1.69975	3.96898	-	-	-	-	-	-
Liver-specific A compartments	3	72140000	72160000	2.30454	-1.21639	3.52093	-	-	-	-	-	-
Liver-specific A compartments	3	72160000	72180000	2.27569	-0.726924	3.00262	-	-	-	-	-	-
Liver-specific A compartments	3	73440000	73460000	0.545016	-0.711668	1.25668	ENSSSCG00000038802	GKN2	0.78	0	5.30397	0.0929748
Liver-specific A compartments	3	73460000	73480000	0.675626	-0.819644	1.49527	ENSSSCG00000037028	GKN3	0.02	0	-	-
Liver-specific A compartments	3	73480000	73500000	0.903209	-0.703543	1.60675	-	-	-	-	-	-
Liver-specific A compartments	3	73500000	73520000	1.00799	-0.789991	1.79798	ENSSSCG00000032071	BMP10	6.23	0.23	4.75462	7.59624e-41
Liver-specific A compartments	3	73520000	73540000	1.2118	-0.796529	2.00833	-	-	-	-	-	-
Liver-specific A compartments	3	73540000	73560000	1.18655	-0.852219	2.03877	-	-	-	-	-	-
Liver-specific A compartments	3	73560000	73580000	1.34942	-0.819738	2.16916	-	-	-	-	-	-
Liver-specific A compartments	3	73580000	73600000	1.55243	-0.599377	2.15181	-	-	-	-	-	-
Liver-specific A compartments	3	73600000	73620000	1.76028	-0.534976	2.29525	-	-	-	-	-	-
Liver-specific A compartments	3	73620000	73640000	1.43756	-0.45413	1.89169	-	-	-	-	-	-
Liver-specific A compartments	3	73640000	73660000	1.13972	-0.706373	1.84609	ENSSSCG00000008344	ARHGAP25	14.9	9.58	0.736887	0.00107763
Liver-specific A compartments	3	73660000	73680000	0.97035	-0.822412	1.79276	-	-	-	-	-	-
Liver-specific A compartments	3	73680000	73700000	0.732907	-1.10309	1.83599	-	-	-	-	-	-
Liver-specific A compartments	3	73700000	73720000	0.716665	-0.937422	1.65409	-	-	-	-	-	-
Liver-specific A compartments	3	73720000	73740000	0.726788	-0.749394	1.47618	-	-	-	-	-	-
Liver-specific A compartments	3	73740000	73760000	0.733443	-0.507101	1.24054	-	-	-	-	-	-
Liver-specific A compartments	3	73760000	73780000	0.895772	-0.427575	1.32335	-	-	-	-	-	-
Liver-specific A compartments	3	79180000	79200000	0.573639	-0.791079	1.36472	-	-	-	-	-	-
Liver-specific A compartments	3	79200000	79220000	0.555555	-0.65653	1.21208	-	-	-	-	-	-
Liver-specific A compartments	3	79220000	79240000	0.616737	-0.544781	1.16152	-	-	-	-	-	-
Liver-specific A compartments	3	79260000	79280000	0.589097	-0.936644	1.52574	-	-	-	-	-	-
Liver-specific A compartments	3	79280000	79300000	0.347255	-1.34457	1.69183	-	-	-	-	-	-
Liver-specific A compartments	3	79300000	79320000	0.395512	-1.55717	1.95268	-	-	-	-	-	-
Liver-specific A compartments	3	79320000	79340000	0.319349	-1.68415	2.0035	-	-	-	-	-	-
Liver-specific A compartments	3	79340000	79360000	0.284098	-1.60995	1.89405	-	-	-	-	-	-
Liver-specific A compartments	3	79400000	79420000	0.525977	-1.14678	1.67276	ENSSSCG00000026713	TMEM17	17.81	11.46	0.751801	0.00619452
Liver-specific A compartments	3	79420000	79440000	0.460915	-0.970189	1.4311	-	-	-	-	-	-
Liver-specific A compartments	3	79440000	79460000	0.413085	-0.901344	1.31443	-	-	-	-	-	-
Liver-specific A compartments	3	79460000	79480000	0.403147	-1.19122	1.59436	-	-	-	-	-	-
Liver-specific A compartments	3	79480000	79500000	0.858754	-1.38129	2.24004	ENSSSCG00000028518	Unknown	0.43	0.04	-	-
Liver-specific A compartments	3	79500000	79520000	1.19958	-1.49405	2.69363	-	-	-	-	-	-
Liver-specific A compartments	3	79520000	79540000	1.35093	-1.86334	3.21427	-	-	-	-	-	-
Liver-specific A compartments	3	79540000	79560000	1.30529	-2.19189	3.49718	-	-	-	-	-	-
Liver-specific A compartments	3	79560000	79580000	1.29168	-2.27432	3.566	-	-	-	-	-	-
Liver-specific A compartments	3	79580000	79600000	1.30143	-2.32128	3.62271	-	-	-	-	-	-
Liver-specific A compartments	3	79600000	79620000	1.52071	-2.18994	3.71065	-	-	-	-	-	-
Liver-specific A compartments	3	79620000	79640000	1.5966	-2.15973	3.75633	-	-	-	-	-	-
Liver-specific A compartments	3	79640000	79660000	1.61025	-2.00207	3.61231	-	-	-	-	-	-
Liver-specific A compartments	3	79660000	79680000	1.69924	-1.68985	3.38909	-	-	-	-	-	-
Liver-specific A compartments	3	79680000	79700000	1.83244	-1.39787	3.23031	-	-	-	-	-	-
Liver-specific A compartments	3	79700000	79720000	1.81796	-1.14533	2.96329	-	-	-	-	-	-
Liver-specific A compartments	3	79720000	79740000	1.55209	-1.50104	3.05313	-	-	-	-	-	-
Liver-specific A compartments	3	79740000	79760000	1.39294	-1.37287	2.76581	-	-	-	-	-	-
Liver-specific A compartments	3	79760000	79780000	1.40909	-1.10631	2.51541	-	-	-	-	-	-
Liver-specific A compartments	3	79780000	79800000	1.40285	-1.03442	2.43727	-	-	-	-	-	-
Liver-specific A compartments	3	79800000	79820000	1.42743	-0.84373	2.27116	-	-	-	-	-	-
Liver-specific A compartments	3	79820000	79840000	1.46767	-0.781751	2.24943	-	-	-	-	-	-
Liver-specific A compartments	3	79840000	79860000	1.38392	-0.809486	2.19341	ENSSSCG00000008374	B3GNT2	56.38	5.76	3.39234	4.00646e-38
Liver-specific A compartments	3	79860000	79880000	1.48186	-0.770103	2.25196	-	-	-	-	-	-
Liver-specific A compartments	3	79880000	79900000	1.51355	-0.410475	1.92402	-	-	-	-	-	-
Liver-specific A compartments	3	80640000	80660000	0.823755	-0.40096	1.22471	-	-	-	-	-	-
Liver-specific A compartments	3	80660000	80680000	0.778376	-0.395458	1.17383	-	-	-	-	-	-
Liver-specific A compartments	3	80680000	80700000	0.623405	-0.38348	1.00689	-	-	-	-	-	-
Liver-specific A compartments	3	80700000	80720000	0.582899	-0.327059	0.909957	-	-	-	-	-	-
Liver-specific A compartments	3	80720000	80740000	0.653199	-0.345394	0.998593	-	-	-	-	-	-
Liver-specific A compartments	3	80740000	80760000	0.649657	-0.321241	0.970899	ENSSSCG00000008386	KIAA1841	14.94	9.47	0.840056	0.00447403
Liver-specific A compartments	3	80760000	80780000	0.50142	-0.360545	0.861965	-	-	-	-	-	-
Liver-specific A compartments	3	80780000	80800000	0.476062	-0.379705	0.855767	ENSSSCG00000008385;ENSSSCG00000008387	PUS10;PEX13	30.29;107.14	24.07;76.14	0.414129223549056;0.499781911717727	0.00153170378681947;0.0145335159993519
Liver-specific A compartments	3	80900000	80920000	0.585468	-0.621207	1.20668	ENSSSCG00000008388	REL	12.31	10.18	0.387983	0.0770974
Liver-specific A compartments	3	80920000	80940000	0.409026	-1.11887	1.5279	ENSSSCG00000049840	Unknown	0.45	1.73	-1.84472	1.46687e-08
Liver-specific A compartments	3	80940000	80960000	0.313376	-1.58371	1.89709	-	-	-	-	-	-
Liver-specific A compartments	3	107620000	107640000	0.562975	-0.489766	1.05274	-	-	-	-	-	-
Liver-specific A compartments	3	107640000	107660000	0.37808	-0.929724	1.3078	-	-	-	-	-	-
Liver-specific A compartments	3	120980000	121000000	0.38618	-0.962781	1.34896	-	-	-	-	-	-
Liver-specific A compartments	3	121640000	121660000	0.405573	-1.47653	1.8821	-	-	-	-	-	-
Liver-specific A compartments	3	121660000	121680000	0.540947	-1.19336	1.7343	-	-	-	-	-	-
Liver-specific A compartments	3	121680000	121700000	0.745446	-1.0607	1.80615	-	-	-	-	-	-
Liver-specific A compartments	3	121700000	121720000	0.813039	-0.927698	1.74074	-	-	-	-	-	-
Liver-specific A compartments	3	121720000	121740000	0.50497	-0.878552	1.38352	-	-	-	-	-	-
Liver-specific A compartments	3	121740000	121760000	0.517519	-0.8914	1.40892	-	-	-	-	-	-
Liver-specific A compartments	3	121760000	121780000	0.532612	-1.05404	1.58665	-	-	-	-	-	-
Liver-specific A compartments	3	121780000	121800000	0.445232	-0.949036	1.39427	-	-	-	-	-	-
Liver-specific A compartments	3	121820000	121840000	0.465799	-0.529085	0.994884	-	-	-	-	-	-
Liver-specific A compartments	3	127480000	127500000	2.54105	-0.228368	2.76942	-	-	-	-	-	-
Liver-specific A compartments	3	127560000	127580000	3.36328	-0.56668	3.92996	-	-	-	-	-	-
Liver-specific A compartments	3	127580000	127600000	3.19614	-0.502669	3.69881	-	-	-	-	-	-
Liver-specific A compartments	3	127600000	127620000	3.35909	-0.363772	3.72286	-	-	-	-	-	-
Liver-specific A compartments	3	127620000	127640000	2.90562	-0.616366	3.52198	-	-	-	-	-	-
Liver-specific A compartments	3	127640000	127660000	2.69539	-0.704309	3.3997	-	-	-	-	-	-
Liver-specific A compartments	3	127660000	127680000	3.12599	-0.552391	3.67838	-	-	-	-	-	-
Liver-specific A compartments	3	127680000	127700000	2.69025	-0.654709	3.34495	-	-	-	-	-	-
Liver-specific A compartments	3	127700000	127720000	2.8521	-0.719454	3.57155	-	-	-	-	-	-
Liver-specific A compartments	3	127720000	127740000	2.47537	-1.10137	3.57673	-	-	-	-	-	-
Liver-specific A compartments	3	127740000	127760000	2.32657	-1.24546	3.57203	-	-	-	-	-	-
Liver-specific A compartments	3	127760000	127780000	2.2464	-1.4468	3.6932	-	-	-	-	-	-
Liver-specific A compartments	3	127780000	127800000	2.26502	-1.26151	3.52653	-	-	-	-	-	-
Liver-specific A compartments	3	127800000	127820000	2.27313	-1.22548	3.49862	-	-	-	-	-	-
Liver-specific A compartments	3	127820000	127840000	2.33907	-1.05125	3.39031	-	-	-	-	-	-
Liver-specific A compartments	3	127840000	127860000	2.42981	-1.00986	3.43967	-	-	-	-	-	-
Liver-specific A compartments	3	127860000	127880000	2.25374	-1.25605	3.50979	-	-	-	-	-	-
Liver-specific A compartments	3	127880000	127900000	2.41699	-1.5442	3.96119	-	-	-	-	-	-
Liver-specific A compartments	3	127900000	127920000	2.43347	-1.6598	4.09328	-	-	-	-	-	-
Liver-specific A compartments	3	127920000	127940000	2.46699	-1.6901	4.15709	-	-	-	-	-	-
Liver-specific A compartments	3	127940000	127960000	2.17646	-1.74987	3.92633	-	-	-	-	-	-
Liver-specific A compartments	3	127960000	127980000	2.16593	-2.04344	4.20936	-	-	-	-	-	-
Liver-specific A compartments	3	127980000	128000000	1.93424	-2.09496	4.0292	-	-	-	-	-	-
Liver-specific A compartments	3	128000000	128020000	1.85542	-2.38688	4.24231	-	-	-	-	-	-
Liver-specific A compartments	3	128020000	128040000	1.57335	-2.54636	4.11971	-	-	-	-	-	-
Liver-specific A compartments	3	128040000	128060000	1.50692	-2.47245	3.97937	-	-	-	-	-	-
Liver-specific A compartments	3	128060000	128080000	1.45229	-2.6358	4.08809	-	-	-	-	-	-
Liver-specific A compartments	3	128080000	128100000	1.24331	-2.89484	4.13815	-	-	-	-	-	-
Liver-specific A compartments	3	128100000	128120000	1.37327	-2.96396	4.33723	-	-	-	-	-	-
Liver-specific A compartments	3	128120000	128140000	1.24438	-3.03345	4.27783	-	-	-	-	-	-
Liver-specific A compartments	3	128140000	128160000	1.25323	-2.94514	4.19836	-	-	-	-	-	-
Liver-specific A compartments	3	128160000	128180000	1.2201	-2.96555	4.18565	-	-	-	-	-	-
Liver-specific A compartments	3	128180000	128200000	1.23142	-2.73897	3.97039	-	-	-	-	-	-
Liver-specific A compartments	3	128200000	128220000	1.47054	-2.74087	4.21142	-	-	-	-	-	-
Liver-specific A compartments	3	128220000	128240000	1.6491	-2.50234	4.15145	-	-	-	-	-	-
Liver-specific A compartments	3	128240000	128260000	1.14615	-2.70188	3.84803	-	-	-	-	-	-
Liver-specific A compartments	3	128260000	128280000	0.786297	-2.66882	3.45512	-	-	-	-	-	-
Liver-specific A compartments	3	128280000	128300000	0.779734	-2.82803	3.60776	-	-	-	-	-	-
Liver-specific A compartments	3	128300000	128320000	0.729019	-3.07214	3.80116	-	-	-	-	-	-
Liver-specific A compartments	3	128320000	128340000	0.661342	-3.24717	3.90851	-	-	-	-	-	-
Liver-specific A compartments	3	128340000	128360000	0.549497	-3.56405	4.11355	-	-	-	-	-	-
Liver-specific A compartments	3	128360000	128380000	0.393828	-3.88779	4.28162	-	-	-	-	-	-
Liver-specific A compartments	3	128380000	128400000	0.497835	-3.76214	4.25997	-	-	-	-	-	-
Liver-specific A compartments	3	128400000	128420000	0.438624	-3.68786	4.12649	-	-	-	-	-	-
Liver-specific A compartments	3	128420000	128440000	0.515626	-3.89407	4.4097	-	-	-	-	-	-
Liver-specific A compartments	3	128440000	128460000	0.495443	-3.86052	4.35596	-	-	-	-	-	-
Liver-specific A compartments	3	128460000	128480000	0.633866	-3.51329	4.14716	-	-	-	-	-	-
Liver-specific A compartments	3	128480000	128500000	0.623735	-2.98869	3.61243	-	-	-	-	-	-
Liver-specific A compartments	3	128500000	128520000	0.450468	-3.13628	3.58675	-	-	-	-	-	-
Liver-specific A compartments	3	128520000	128540000	0.447963	-3.36763	3.81559	-	-	-	-	-	-
Liver-specific A compartments	3	128540000	128560000	0.566024	-3.37952	3.94554	-	-	-	-	-	-
Liver-specific A compartments	3	128580000	128600000	0.53461	-3.41648	3.95109	-	-	-	-	-	-
Liver-specific A compartments	3	128600000	128620000	0.607235	-3.40839	4.01562	-	-	-	-	-	-
Liver-specific A compartments	3	128620000	128640000	0.518871	-3.40114	3.92002	-	-	-	-	-	-
Liver-specific A compartments	3	128640000	128660000	0.693632	-3.15584	3.84947	-	-	-	-	-	-
Liver-specific A compartments	3	128660000	128680000	0.540283	-2.92989	3.47017	-	-	-	-	-	-
Liver-specific A compartments	3	128680000	128700000	0.677803	-2.82217	3.49997	-	-	-	-	-	-
Liver-specific A compartments	3	128700000	128720000	0.735726	-2.4814	3.21712	-	-	-	-	-	-
Liver-specific A compartments	3	128720000	128740000	1.13207	-1.88359	3.01566	-	-	-	-	-	-
Liver-specific A compartments	3	128740000	128760000	1.41303	-1.05929	2.47232	-	-	-	-	-	-
Liver-specific A compartments	3	128760000	128780000	1.69935	-0.661012	2.36036	-	-	-	-	-	-
Liver-specific A compartments	3	128780000	128800000	1.92434	-0.258939	2.18328	-	-	-	-	-	-
Liver-specific A compartments	3	128860000	128880000	1.65081	-0.590854	2.24166	-	-	-	-	-	-
Liver-specific A compartments	3	128880000	128900000	1.56029	-0.999472	2.55976	ENSSSCG00000008648	RSAD2	29.03	52.04	-0.535612	0.708242
Liver-specific A compartments	3	128900000	128920000	0.971431	-1.43934	2.41078	ENSSSCG00000008647	CMPK2	23.81	20.14	0.310626	0.615193
Liver-specific A compartments	3	132760000	132780000	0.312391	-0.562538	0.87493	-	-	-	-	-	-
Liver-specific A compartments	3	132780000	132800000	0.685556	-1.35127	2.03683	-	-	-	-	-	-
Liver-specific A compartments	3	132800000	132820000	1.00349	-1.63354	2.63703	ENSSSCG00000032221	FAM110C	48.98	0.18	8.33698	5.07571e-81
Liver-specific A compartments	3	132820000	132840000	0.948921	-1.35698	2.3059	-	-	-	-	-	-
Liver-specific A compartments	4	13420000	13440000	0.410438	-0.704553	1.11499	-	-	-	-	-	-
Liver-specific A compartments	4	13440000	13460000	0.519482	-0.713501	1.23298	ENSSSCG00000005967	LRATD2	11.6	3.41	2.01819	3.84513e-13
Liver-specific A compartments	4	13460000	13480000	0.4279	-1.2937	1.7216	-	-	-	-	-	-
Liver-specific A compartments	4	19400000	19420000	0.649636	-0.183122	0.832759	-	-	-	-	-	-
Liver-specific A compartments	4	19420000	19440000	0.529121	-0.450314	0.979435	-	-	-	-	-	-
Liver-specific A compartments	4	19440000	19460000	0.518715	-0.343694	0.862408	-	-	-	-	-	-
Liver-specific A compartments	4	35500000	35520000	2.01449	-0.260195	2.27469	-	-	-	-	-	-
Liver-specific A compartments	4	35520000	35540000	2.06325	-0.392077	2.45533	-	-	-	-	-	-
Liver-specific A compartments	4	35540000	35560000	2.13672	-0.263522	2.40024	-	-	-	-	-	-
Liver-specific A compartments	4	35560000	35580000	2.21946	-0.302755	2.52222	ENSSSCG00000006060	GRHL2	1.83	0.09	4.70091	4.31557e-18
Liver-specific A compartments	4	36920000	36940000	1.79885	-0.728971	2.52782	-	-	-	-	-	-
Liver-specific A compartments	4	36940000	36960000	1.69887	-0.683199	2.38207	-	-	-	-	-	-
Liver-specific A compartments	4	36960000	36980000	1.7018	-0.796358	2.49815	-	-	-	-	-	-
Liver-specific A compartments	4	36980000	37000000	1.68346	-0.410255	2.09371	-	-	-	-	-	-
Liver-specific A compartments	4	37000000	37020000	1.87142	-0.31775	2.18917	-	-	-	-	-	-
Liver-specific A compartments	4	39740000	39760000	0.550736	-0.725103	1.27584	-	-	-	-	-	-
Liver-specific A compartments	4	39760000	39780000	0.605765	-0.755806	1.36157	-	-	-	-	-	-
Liver-specific A compartments	4	39780000	39800000	0.584059	-0.55707	1.14113	-	-	-	-	-	-
Liver-specific A compartments	4	39800000	39820000	0.697577	-0.745038	1.44262	-	-	-	-	-	-
Liver-specific A compartments	4	39820000	39840000	0.652034	-0.724316	1.37635	-	-	-	-	-	-
Liver-specific A compartments	4	39840000	39860000	0.579495	-0.78846	1.36796	-	-	-	-	-	-
Liver-specific A compartments	4	39860000	39880000	0.578972	-0.65963	1.2386	-	-	-	-	-	-
Liver-specific A compartments	4	39880000	39900000	0.60727	-0.568429	1.1757	-	-	-	-	-	-
Liver-specific A compartments	4	55660000	55680000	0.383641	-0.500613	0.884254	-	-	-	-	-	-
Liver-specific A compartments	4	67780000	67800000	0.558225	-0.420328	0.978553	-	-	-	-	-	-
Liver-specific A compartments	4	67800000	67820000	0.561721	-0.446202	1.00792	ENSSSCG00000049935	TCF24	0.35	0.16	-	-
Liver-specific A compartments	4	67820000	67840000	0.663307	-0.44859	1.1119	-	-	-	-	-	-
Liver-specific A compartments	4	67840000	67860000	0.79821	-0.323316	1.12153	ENSSSCG00000006202	CSPP1	21.93	31.77	-0.39634	0.0281208
Liver-specific A compartments	4	67860000	67880000	0.556633	-1.36604	1.92267	-	-	-	-	-	-
Liver-specific A compartments	4	67880000	67900000	0.770752	-1.68543	2.45618	ENSSSCG00000006205	MCMDC2	2.58	1.06	1.4786	1.33519e-07
Liver-specific A compartments	4	67900000	67920000	0.795416	-1.82199	2.61741	-	-	-	-	-	-
Liver-specific A compartments	4	67920000	67940000	0.855074	-1.77965	2.63472	-	-	-	-	-	-
Liver-specific A compartments	4	67940000	67960000	0.924862	-1.93026	2.85512	-	-	-	-	-	-
Liver-specific A compartments	4	67960000	67980000	1.22918	-1.48314	2.71232	-	-	-	-	-	-
Liver-specific A compartments	4	67980000	68000000	1.32748	-1.53107	2.85856	-	-	-	-	-	-
Liver-specific A compartments	4	68000000	68020000	1.49314	-1.11065	2.60379	-	-	-	-	-	-
Liver-specific A compartments	4	68020000	68040000	1.71169	-0.419928	2.13162	ENSSSCG00000006206	SGK3	40.65	5.59	2.95452	7.80141e-19
Liver-specific A compartments	4	69660000	69680000	0.226874	-0.668899	0.895773	-	-	-	-	-	-
Liver-specific A compartments	4	70980000	71000000	1.12837	-0.336734	1.4651	-	-	-	-	-	-
Liver-specific A compartments	4	71000000	71020000	0.962446	-0.698369	1.66081	-	-	-	-	-	-
Liver-specific A compartments	4	71020000	71040000	0.424345	-1.08542	1.50976	-	-	-	-	-	-
Liver-specific A compartments	4	77040000	77060000	0.530387	-0.8549	1.38529	-	-	-	-	-	-
Liver-specific A compartments	4	81300000	81320000	1.95173	-0.501173	2.4529	ENSSSCG00000006287	SELL	63.41	7.83	3.23297	1.55154e-09
Liver-specific A compartments	4	81340000	81360000	2.01576	-0.69823	2.71399	-	-	-	-	-	-
Liver-specific A compartments	4	83500000	83520000	0.899452	-0.534542	1.43399	-	-	-	-	-	-
Liver-specific A compartments	4	83520000	83540000	0.800226	-0.519419	1.31964	-	-	-	-	-	-
Liver-specific A compartments	4	83540000	83560000	0.749066	-0.331902	1.08097	-	-	-	-	-	-
Liver-specific A compartments	4	85100000	85120000	0.53644	-0.538079	1.07452	-	-	-	-	-	-
Liver-specific A compartments	4	87720000	87740000	0.896744	-0.54967	1.44641	-	-	-	-	-	-
Liver-specific A compartments	4	88060000	88080000	1.99244	-0.765464	2.7579	ENSSSCG00000046961	Unknown	1.19	0	4.6937	0.038087
Liver-specific A compartments	4	88080000	88100000	1.9109	-1.1542	3.0651	ENSSSCG00000032108	Unknown	2.13	1.2	1.09656	0.000438867
Liver-specific A compartments	4	88100000	88120000	1.85925	-1.14187	3.00112	-	-	-	-	-	-
Liver-specific A compartments	4	88120000	88140000	1.93014	-0.917779	2.84792	-	-	-	-	-	-
Liver-specific A compartments	4	88140000	88160000	2.03843	-0.841144	2.87958	ENSSSCG00000006343	SPATA46	0.24	0	-	-
Liver-specific A compartments	4	88160000	88180000	1.88835	-1.28941	3.17777	-	-	-	-	-	-
Liver-specific A compartments	4	88180000	88200000	1.85968	-1.444	3.30368	-	-	-	-	-	-
Liver-specific A compartments	4	88200000	88220000	1.83584	-1.52857	3.36441	-	-	-	-	-	-
Liver-specific A compartments	4	88220000	88240000	1.74876	-1.58977	3.33852	-	-	-	-	-	-
Liver-specific A compartments	4	88240000	88260000	1.68154	-1.46821	3.14975	-	-	-	-	-	-
Liver-specific A compartments	4	88260000	88280000	1.77475	-1.22427	2.99902	-	-	-	-	-	-
Liver-specific A compartments	4	88280000	88300000	1.70322	-1.25518	2.9584	-	-	-	-	-	-
Liver-specific A compartments	4	88300000	88320000	1.75815	-1.13525	2.8934	-	-	-	-	-	-
Liver-specific A compartments	4	88320000	88340000	2.01321	-0.93168	2.94489	ENSSSCG00000045357	Unknown	0.04	0.1	-	-
Liver-specific A compartments	4	88340000	88360000	1.96769	-1.16582	3.13351	-	-	-	-	-	-
Liver-specific A compartments	4	88360000	88380000	2.05081	-1.24905	3.29986	-	-	-	-	-	-
Liver-specific A compartments	4	88380000	88400000	1.94592	-1.07333	3.01926	-	-	-	-	-	-
Liver-specific A compartments	4	88400000	88420000	2.02551	-1.25593	3.28144	-	-	-	-	-	-
Liver-specific A compartments	4	88420000	88440000	2.17948	-1.22816	3.40763	-	-	-	-	-	-
Liver-specific A compartments	4	88440000	88460000	2.21335	-0.826803	3.04016	-	-	-	-	-	-
Liver-specific A compartments	4	88460000	88480000	2.23919	-0.368482	2.60768	ENSSSCG00000006344	NOS1AP	8.8	2	2.11505	7.61272e-28
Liver-specific A compartments	4	88840000	88860000	2.74965	-0.565456	3.31511	ENSSSCG00000030246	FCRLA	1.34	0.41	2.17304	0.000200244
Liver-specific A compartments	4	88860000	88880000	2.89549	-0.948966	3.84446	-	-	-	-	-	-
Liver-specific A compartments	4	88880000	88900000	2.82911	-1.15321	3.98231	-	-	-	-	-	-
Liver-specific A compartments	4	88900000	88920000	2.76185	-1.22333	3.98519	-	-	-	-	-	-
Liver-specific A compartments	4	88920000	88940000	2.93777	-0.731765	3.66953	ENSSSCG00000043911	Unknown	0.58	0.33	1.32711	0.709558
Liver-specific A compartments	4	88940000	88960000	3.23222	-0.326056	3.55828	ENSSSCG00000036618	FCGR3B	258.22	43.39	2.68258	3.20559e-07
Liver-specific A compartments	4	88980000	89000000	3.02197	-0.451382	3.47336	ENSSSCG00000006350;ENSSSCG00000047932	FCGR2B;HSPA6	274.83;2.16	4.96;1.41	5.79780002484667;0.851559653203163	5.99954870535706e-66;0.00420912619752716
Liver-specific A compartments	4	89000000	89020000	3.14634	-0.619526	3.76587	-	-	-	-	-	-
Liver-specific A compartments	4	89040000	89060000	2.99524	-1.07973	4.07497	ENSSSCG00000051708	Unknown	0.42	1.46	-1.75087	5.21011e-05
Liver-specific A compartments	4	89480000	89500000	2.52907	-0.849179	3.37825	-	-	-	-	-	-
Liver-specific A compartments	4	89500000	89520000	2.45508	-0.955225	3.4103	ENSSSCG00000025885	ITLN2	1.09	1.79	-0.612137	0.0527371
Liver-specific A compartments	4	89520000	89540000	2.07007	-1.41141	3.48148	-	-	-	-	-	-
Liver-specific A compartments	4	89540000	89560000	1.99099	-1.61988	3.61087	-	-	-	-	-	-
Liver-specific A compartments	4	89560000	89580000	1.35626	-1.8426	3.19886	-	-	-	-	-	-
Liver-specific A compartments	4	89580000	89600000	1.16129	-1.1223	2.28359	-	-	-	-	-	-
Liver-specific A compartments	4	89600000	89620000	1.3543	-1.20778	2.56208	-	-	-	-	-	-
Liver-specific A compartments	4	89620000	89640000	1.8626	-2.01797	3.88057	-	-	-	-	-	-
Liver-specific A compartments	4	89640000	89660000	1.55614	-3.02529	4.58143	-	-	-	-	-	-
Liver-specific A compartments	4	89660000	89680000	1.55546	-3.18274	4.7382	ENSSSCG00000006374	CD244	7.02	1.21	2.4068	2.00397e-07
Liver-specific A compartments	4	89680000	89700000	1.48209	-3.18442	4.66651	-	-	-	-	-	-
Liver-specific A compartments	4	89700000	89720000	1.43137	-3.43735	4.86872	-	-	-	-	-	-
Liver-specific A compartments	4	89720000	89740000	1.42456	-3.64172	5.06628	ENSSSCG00000006375;ENSSSCG00000006376	LY9;Unknown	16.26;1.54	1.34;0.13	3.66349844652286;4.17292168610847	8.31176516871306e-13;2.27162120662836e-09
Liver-specific A compartments	4	89740000	89760000	1.22268	-3.51668	4.73936	-	-	-	-	-	-
Liver-specific A compartments	4	89760000	89780000	1.23388	-3.73072	4.96461	-	-	-	-	-	-
Liver-specific A compartments	4	89780000	89800000	1.17544	-3.89626	5.07171	ENSSSCG00000006378	SLAMF7	2.74	1.41	1.22177	7.59911e-06
Liver-specific A compartments	4	89800000	89820000	1.12736	-3.86845	4.99581	-	-	-	-	-	-
Liver-specific A compartments	4	89820000	89840000	1.19044	-3.59416	4.7846	ENSSSCG00000006379	CD48	20.97	10.03	1.24525	0.00776655
Liver-specific A compartments	4	89840000	89860000	1.12373	-3.56894	4.69267	-	-	-	-	-	-
Liver-specific A compartments	4	89860000	89880000	1.20287	-3.40371	4.60659	ENSSSCG00000006380	SLAMF1	0.7	1.24	-0.771185	0.0276907
Liver-specific A compartments	4	89880000	89900000	1.32391	-3.39915	4.72306	-	-	-	-	-	-
Liver-specific A compartments	4	89900000	89920000	1.10738	-3.14798	4.25536	-	-	-	-	-	-
Liver-specific A compartments	4	89920000	89940000	1.06469	-3.17443	4.23912	ENSSSCG00000006381	CD84	7.33	1.49	2.53329	3.23332e-11
Liver-specific A compartments	4	89940000	89960000	1.3252	-2.65018	3.97538	-	-	-	-	-	-
Liver-specific A compartments	4	89960000	89980000	1.34765	-2.5079	3.85555	-	-	-	-	-	-
Liver-specific A compartments	4	89980000	90000000	1.42827	-2.1551	3.58337	ENSSSCG00000006382	SLAMF6	3.42	1.34	1.4472	8.38428e-07
Liver-specific A compartments	4	90000000	90020000	1.52305	-1.60567	3.12872	-	-	-	-	-	-
Liver-specific A compartments	4	90020000	90040000	1.64074	-1.06125	2.70198	-	-	-	-	-	-
Liver-specific A compartments	4	90820000	90840000	0.857683	-0.685507	1.54319	-	-	-	-	-	-
Liver-specific A compartments	4	90840000	90860000	0.727496	-0.693267	1.42076	-	-	-	-	-	-
Liver-specific A compartments	4	90860000	90880000	0.573474	-1.08466	1.65814	-	-	-	-	-	-
Liver-specific A compartments	4	90880000	90900000	0.59319	-1.16047	1.75366	ENSSSCG00000041117	Unknown	0.01	0	-	-
Liver-specific A compartments	4	90900000	90920000	0.712062	-1.38699	2.09905	ENSSSCG00000037268	APCS	440.93	0.87	9.3329	8.18679e-31
Liver-specific A compartments	4	90920000	90940000	0.66958	-1.9229	2.59248	-	-	-	-	-	-
Liver-specific A compartments	4	90940000	90960000	0.641628	-2.03632	2.67794	ENSSSCG00000050088	OR10J5	0.14	0	-	-
Liver-specific A compartments	4	90960000	90980000	0.626539	-2.1306	2.75714	-	-	-	-	-	-
Liver-specific A compartments	4	90980000	91000000	0.472465	-2.22054	2.69301	-	-	-	-	-	-
Liver-specific A compartments	4	91000000	91020000	0.376834	-2.42592	2.80275	ENSSSCG00000024008	OR10J1	0.06	0	-	-
Liver-specific A compartments	4	91200000	91220000	0.496983	-2.0042	2.50118	-	-	-	-	-	-
Liver-specific A compartments	4	91220000	91240000	0.484185	-1.24007	1.72426	ENSSSCG00000036223	ACKR1	1.61	7.58	-2.26312	2.29e-11
Liver-specific A compartments	4	91240000	91260000	0.509407	-1.25039	1.7598	-	-	-	-	-	-
Liver-specific A compartments	4	91260000	91280000	0.302705	-1.69512	1.99782	ENSSSCG00000006415	CADM3	0.9	6.19	-3.71526	1.18667e-49
Liver-specific A compartments	4	92100000	92120000	1.80984	-1.69383	3.50367	ENSSSCG00000006452	CD1D	11.02	3.78	1.77869	7.508e-07
Liver-specific A compartments	4	92120000	92140000	0.691568	-0.838532	1.5301	-	-	-	-	-	-
Liver-specific A compartments	4	92140000	92160000	0.846516	-0.794159	1.64067	-	-	-	-	-	-
Liver-specific A compartments	4	92160000	92180000	0.787551	-0.899087	1.68664	-	-	-	-	-	-
Liver-specific A compartments	4	92180000	92200000	0.946179	-0.399278	1.34546	-	-	-	-	-	-
Liver-specific A compartments	4	92200000	92220000	1.08182	-0.359689	1.44151	-	-	-	-	-	-
Liver-specific A compartments	4	92220000	92240000	1.04514	-0.306255	1.3514	-	-	-	-	-	-
Liver-specific A compartments	4	92240000	92260000	1.10608	-0.0933272	1.19941	-	-	-	-	-	-
Liver-specific A compartments	4	92300000	92320000	1.12995	-0.93994	2.06989	ENSSSCG00000039068	UBE2E3	0	0	-	-
Liver-specific A compartments	4	92320000	92340000	0.969144	-1.4537	2.42284	-	-	-	-	-	-
Liver-specific A compartments	4	92340000	92360000	0.967048	-2.20132	3.16837	-	-	-	-	-	-
Liver-specific A compartments	4	92360000	92380000	1.11991	-2.58303	3.70294	-	-	-	-	-	-
Liver-specific A compartments	4	92380000	92400000	1.5873	-3.02221	4.60951	ENSSSCG00000006455	CD5L	800.17	2.68	8.30551	1.45542e-112
Liver-specific A compartments	4	92400000	92420000	1.21794	-3.5831	4.80104	ENSSSCG00000006456	FCRL1	1.61	0.96	1.01537	0.0106041
Liver-specific A compartments	4	92420000	92440000	0.969768	-3.97421	4.94398	-	-	-	-	-	-
Liver-specific A compartments	4	92440000	92460000	0.917503	-4.27845	5.19595	-	-	-	-	-	-
Liver-specific A compartments	4	92460000	92480000	0.846369	-4.47563	5.32199	ENSSSCG00000006457	FCRL3	4.32	0.43	3.82062	5.74462e-14
Liver-specific A compartments	4	92480000	92500000	0.968681	-4.20037	5.16905	-	-	-	-	-	-
Liver-specific A compartments	4	92500000	92520000	1.02047	-4.14216	5.16264	-	-	-	-	-	-
Liver-specific A compartments	4	92520000	92540000	1.15813	-3.93537	5.0935	-	-	-	-	-	-
Liver-specific A compartments	4	92540000	92560000	1.18735	-3.93329	5.12064	ENSSSCG00000006458	FCRL4	0.21	0.08	-	-
Liver-specific A compartments	4	92560000	92580000	1.23565	-3.77146	5.00712	-	-	-	-	-	-
Liver-specific A compartments	4	92580000	92600000	1.45183	-3.58618	5.03801	ENSSSCG00000026210	FCRL5	0.53	0.53	0.305172	0.708873
Liver-specific A compartments	4	92600000	92620000	1.70086	-3.22181	4.92267	-	-	-	-	-	-
Liver-specific A compartments	4	92620000	92640000	1.95617	-2.67522	4.63138	-	-	-	-	-	-
Liver-specific A compartments	4	92640000	92660000	2.1886	-1.89444	4.08304	-	-	-	-	-	-
Liver-specific A compartments	4	92660000	92680000	2.21034	-1.72149	3.93182	-	-	-	-	-	-
Liver-specific A compartments	4	92680000	92700000	2.35067	-1.34434	3.69501	-	-	-	-	-	-
Liver-specific A compartments	4	92700000	92720000	2.621	-1.59884	4.21984	-	-	-	-	-	-
Liver-specific A compartments	4	92720000	92740000	2.82221	-1.6775	4.49971	-	-	-	-	-	-
Liver-specific A compartments	4	92740000	92760000	3.05303	-1.59707	4.65009	ENSSSCG00000036622	Unknown	15.63	1.94	3.26031	1.56338e-25
Liver-specific A compartments	4	92760000	92780000	3.00892	-1.4788	4.48771	-	-	-	-	-	-
Liver-specific A compartments	4	92780000	92800000	2.7658	-1.30138	4.06717	ENSSSCG00000049524	Unknown	35.77	18.54	1.123	2.61621e-08
Liver-specific A compartments	4	92800000	92820000	2.43963	-1.57832	4.01795	-	-	-	-	-	-
Liver-specific A compartments	4	92820000	92840000	2.61219	-1.79945	4.41164	ENSSSCG00000043115	Unknown	29.89	1.46	4.43518	7.77306e-17
Liver-specific A compartments	4	92840000	92860000	2.51411	-1.80136	4.31548	-	-	-	-	-	-
Liver-specific A compartments	4	92860000	92880000	2.5333	-1.67105	4.20435	-	-	-	-	-	-
Liver-specific A compartments	4	92880000	92900000	2.42425	-1.10095	3.5252	-	-	-	-	-	-
Liver-specific A compartments	4	96260000	96280000	1.5702	-0.76203	2.33223	-	-	-	-	-	-
Liver-specific A compartments	4	96280000	96300000	1.23925	-1.45243	2.69167	-	-	-	-	-	-
Liver-specific A compartments	4	96300000	96320000	0.969382	-2.13909	3.10848	-	-	-	-	-	-
Liver-specific A compartments	4	96320000	96340000	0.831372	-2.58795	3.41932	-	-	-	-	-	-
Liver-specific A compartments	4	96640000	96660000	0.555188	-3.29086	3.84605	ENSSSCG00000006595	IVL	0.11	0	-	-
Liver-specific A compartments	4	96660000	96680000	0.628195	-3.27407	3.90226	ENSSSCG00000006594	SMCP	0.01	0	-	-
Liver-specific A compartments	4	96680000	96700000	0.468859	-3.51687	3.98573	-	-	-	-	-	-
Liver-specific A compartments	4	96720000	96740000	0.572831	-3.85013	4.42296	-	-	-	-	-	-
Liver-specific A compartments	4	96740000	96760000	0.808855	-3.66126	4.47012	-	-	-	-	-	-
Liver-specific A compartments	4	96760000	96780000	1.02211	-3.56236	4.58447	-	-	-	-	-	-
Liver-specific A compartments	4	96780000	96800000	1.0624	-3.58173	4.64413	ENSSSCG00000040878	LCE5A	0	0	-	-
Liver-specific A compartments	4	96800000	96820000	1.23499	-3.29242	4.52741	-	-	-	-	-	-
Liver-specific A compartments	4	96820000	96840000	1.11554	-3.00639	4.12193	-	-	-	-	-	-
Liver-specific A compartments	4	96840000	96860000	1.03974	-2.73573	3.77547	-	-	-	-	-	-
Liver-specific A compartments	4	96860000	96880000	1.18737	-2.36399	3.55136	-	-	-	-	-	-
Liver-specific A compartments	4	96880000	96900000	1.40908	-1.86664	3.27573	-	-	-	-	-	-
Liver-specific A compartments	4	96900000	96920000	1.3799	-1.54866	2.92856	ENSSSCG00000042968	Unknown	0.24	0.62	-1.20143	0.00273393
Liver-specific A compartments	4	96920000	96940000	1.29088	-1.86978	3.16066	ENSSSCG00000006604	CRNN	0.83	0.84	0.222195	0.504655
Liver-specific A compartments	4	96940000	96960000	1.07796	-2.4598	3.53777	-	-	-	-	-	-
Liver-specific A compartments	4	96960000	96980000	0.713717	-3.18667	3.90039	-	-	-	-	-	-
Liver-specific A compartments	4	96980000	97000000	0.654362	-3.36223	4.01659	ENSSSCG00000030031;ENSSSCG00000042564	Unknown;FLG2	0.03;0	0.01;0	-;-	-;-
Liver-specific A compartments	4	97000000	97020000	0.799602	-3.65885	4.45845	-	-	-	-	-	-
Liver-specific A compartments	4	97020000	97040000	0.713705	-3.607	4.3207	ENSSSCG00000044041	Unknown	0.12	0	-	-
Liver-specific A compartments	4	97040000	97060000	0.856544	-3.44561	4.30215	-	-	-	-	-	-
Liver-specific A compartments	4	97060000	97080000	0.936021	-2.88161	3.81764	-	-	-	-	-	-
Liver-specific A compartments	4	97080000	97100000	0.922309	-2.52696	3.44927	-	-	-	-	-	-
Liver-specific A compartments	4	97100000	97120000	1.22885	-2.18697	3.41582	-	-	-	-	-	-
Liver-specific A compartments	4	97120000	97140000	1.26744	-2.0068	3.27423	ENSSSCG00000006605	RPTN	0.02	0	-	-
Liver-specific A compartments	4	97140000	97160000	1.26973	-1.8534	3.12313	-	-	-	-	-	-
Liver-specific A compartments	4	97160000	97180000	1.32965	-1.49329	2.82294	ENSSSCG00000006609;ENSSSCG00000038121	TCHHL1;Unknown	0.03;0.3	0;0.42	-;-	-;-
Liver-specific A compartments	4	97180000	97200000	1.66399	-0.797428	2.46142	-	-	-	-	-	-
Liver-specific A compartments	4	97200000	97220000	2.1088	-0.357819	2.46662	-	-	-	-	-	-
Liver-specific A compartments	4	99740000	99760000	1.88	-0.761736	2.64174	-	-	-	-	-	-
Liver-specific A compartments	4	99760000	99780000	1.87928	-1.27949	3.15877	-	-	-	-	-	-
Liver-specific A compartments	4	99780000	99800000	1.81411	-1.46628	3.28039	-	-	-	-	-	-
Liver-specific A compartments	4	99800000	99820000	1.87361	-1.43184	3.30545	-	-	-	-	-	-
Liver-specific A compartments	4	99820000	99840000	1.72877	-1.32189	3.05067	-	-	-	-	-	-
Liver-specific A compartments	4	99840000	99860000	1.89344	-1.03681	2.93025	ENSSSCG00000006696	GJA5	13.81	13.71	0.117946	0.654221
Liver-specific A compartments	4	99860000	99880000	1.86885	-0.900515	2.76937	-	-	-	-	-	-
Liver-specific A compartments	4	99880000	99900000	1.94208	-0.502391	2.44447	-	-	-	-	-	-
Liver-specific A compartments	4	99900000	99920000	2.23762	-0.188889	2.42651	-	-	-	-	-	-
Liver-specific A compartments	4	100100000	100120000	1.45214	-0.942838	2.39498	-	-	-	-	-	-
Liver-specific A compartments	4	100120000	100140000	1.1515	-2.24772	3.39922	-	-	-	-	-	-
Liver-specific A compartments	4	100140000	100160000	0.962881	-2.60057	3.56345	-	-	-	-	-	-
Liver-specific A compartments	4	100160000	100180000	0.852015	-3.14605	3.99807	ENSSSCG00000033862	Unknown	0.01	0	-	-
Liver-specific A compartments	4	100180000	100200000	0.748769	-3.16198	3.91075	-	-	-	-	-	-
Liver-specific A compartments	4	100200000	100220000	0.773879	-3.01163	3.78551	-	-	-	-	-	-
Liver-specific A compartments	4	100220000	100240000	0.981894	-2.92756	3.90946	-	-	-	-	-	-
Liver-specific A compartments	4	100240000	100260000	1.2125	-2.34422	3.55672	-	-	-	-	-	-
Liver-specific A compartments	4	100260000	100280000	1.61656	-1.24391	2.86048	-	-	-	-	-	-
Liver-specific A compartments	4	104660000	104680000	1.35147	-0.544482	1.89595	-	-	-	-	-	-
Liver-specific A compartments	4	104680000	104700000	1.29389	-0.461462	1.75535	-	-	-	-	-	-
Liver-specific A compartments	4	104700000	104720000	1.31236	-0.649475	1.96184	-	-	-	-	-	-
Liver-specific A compartments	4	104720000	104740000	1.22122	-0.722493	1.94372	-	-	-	-	-	-
Liver-specific A compartments	4	104740000	104760000	1.32279	-0.512216	1.83501	-	-	-	-	-	-
Liver-specific A compartments	4	104760000	104780000	1.10559	-0.776688	1.88228	-	-	-	-	-	-
Liver-specific A compartments	4	104780000	104800000	1.0237	-1.09127	2.11497	-	-	-	-	-	-
Liver-specific A compartments	4	104800000	104820000	0.897354	-1.16108	2.05843	-	-	-	-	-	-
Liver-specific A compartments	4	104820000	104840000	0.816853	-0.983184	1.80004	-	-	-	-	-	-
Liver-specific A compartments	4	105080000	105100000	0.78732	-0.54202	1.32934	-	-	-	-	-	-
Liver-specific A compartments	4	105100000	105120000	0.683592	-1.01792	1.70151	-	-	-	-	-	-
Liver-specific A compartments	4	105120000	105140000	0.579719	-1.02253	1.60225	-	-	-	-	-	-
Liver-specific A compartments	4	105140000	105160000	0.507783	-1.41964	1.92742	-	-	-	-	-	-
Liver-specific A compartments	4	105160000	105180000	0.41675	-1.63992	2.05667	-	-	-	-	-	-
Liver-specific A compartments	4	105180000	105200000	0.450078	-1.75507	2.20514	-	-	-	-	-	-
Liver-specific A compartments	4	105200000	105220000	0.545163	-1.73547	2.28063	ENSSSCG00000042421;ENSSSCG00000047855	Unknown;Unknown	0;0.02	0;0	-;-	-;-
Liver-specific A compartments	4	105220000	105240000	0.570451	-1.62386	2.19431	-	-	-	-	-	-
Liver-specific A compartments	4	105440000	105460000	0.674633	-1.47255	2.14718	-	-	-	-	-	-
Liver-specific A compartments	4	105460000	105480000	0.802364	-1.11118	1.91354	-	-	-	-	-	-
Liver-specific A compartments	4	105480000	105500000	0.951267	-1.06681	2.01808	-	-	-	-	-	-
Liver-specific A compartments	4	105500000	105520000	1.19701	-0.831049	2.02806	ENSSSCG00000006748	TSPAN2	3.51	1.01	1.98594	9.03048e-09
Liver-specific A compartments	4	105520000	105540000	0.906543	-0.889563	1.79611	-	-	-	-	-	-
Liver-specific A compartments	4	105540000	105560000	0.724537	-1.1751	1.89963	ENSSSCG00000006749	TSHB	0	0	-	-
Liver-specific A compartments	4	105580000	105600000	0.473501	-1.52466	1.99816	-	-	-	-	-	-
Liver-specific A compartments	4	105720000	105740000	0.843469	-0.520569	1.36404	ENSSSCG00000006750	SYCP1	1.46	0.09	5.09737	1.73071e-07
Liver-specific A compartments	4	106240000	106260000	1.82151	-0.531863	2.35337	-	-	-	-	-	-
Liver-specific A compartments	4	106260000	106280000	1.85137	-0.557695	2.40907	-	-	-	-	-	-
Liver-specific A compartments	4	106280000	106300000	1.95434	-0.452771	2.40711	-	-	-	-	-	-
Liver-specific A compartments	4	108100000	108120000	1.1206	-0.736795	1.8574	-	-	-	-	-	-
Liver-specific A compartments	4	108140000	108160000	0.844911	-0.897743	1.74265	-	-	-	-	-	-
Liver-specific A compartments	4	108160000	108180000	0.811683	-1.14385	1.95553	-	-	-	-	-	-
Liver-specific A compartments	4	109000000	109020000	1.51581	-0.894081	2.40989	-	-	-	-	-	-
Liver-specific A compartments	4	109020000	109040000	1.45301	-0.996888	2.4499	ENSSSCG00000039977	PIFO	0.73	1.03	-0.269663	0.566592
Liver-specific A compartments	4	109040000	109060000	1.46874	-1.11863	2.58737	ENSSSCG00000023706	CHIA	0.38	0.1	-	-
Liver-specific A compartments	4	109060000	109080000	1.45579	-1.07007	2.52586	-	-	-	-	-	-
Liver-specific A compartments	4	109080000	109100000	1.70082	-0.89201	2.59283	ENSSSCG00000006796	CHI3L2	1.43	2.1	-0.30428	0.494352
Liver-specific A compartments	4	109100000	109120000	1.97903	-0.70939	2.68842	-	-	-	-	-	-
Liver-specific A compartments	4	109120000	109140000	2.3824	-0.601173	2.98357	ENSSSCG00000025704;ENSSSCG00000051040	DENND2D;Unknown	57.28;2.18	0.94;0	5.84428603103281;4.76843782194763	3.76407389976306e-65;0.0928442252949065
Liver-specific A compartments	4	109180000	109200000	1.62454	-0.554253	2.17879	ENSSSCG00000026922;ENSSSCG00000029918	DRAM2;CEPT1	79.18;97.36	22.74;34.58	1.91058652537387;1.531281991283	1.96702771051104e-16;3.74704425629229e-11
Liver-specific A compartments	4	109200000	109220000	0.833205	-1.98048	2.81369	-	-	-	-	-	-
Liver-specific A compartments	4	109240000	109260000	0.550729	-2.99937	3.5501	-	-	-	-	-	-
Liver-specific A compartments	4	109260000	109280000	0.649873	-2.51282	3.16269	ENSSSCG00000006799	LRIF1	11.74	8.12	0.56994	0.0410978
Liver-specific A compartments	4	109440000	109460000	0.516908	-2.34063	2.85754	-	-	-	-	-	-
Liver-specific A compartments	4	109460000	109480000	0.488351	-2.04733	2.53568	-	-	-	-	-	-
Liver-specific A compartments	4	109480000	109500000	0.638112	-1.3011	1.93921	ENSSSCG00000006802	KCNA3	0.94	1.88	-0.833265	0.00621283
Liver-specific A compartments	4	109520000	109540000	0.829638	-0.754802	1.58444	-	-	-	-	-	-
Liver-specific A compartments	4	109540000	109560000	0.872046	-0.444016	1.31606	ENSSSCG00000037709	KCNA2	0.06	0.13	-	-
Liver-specific A compartments	4	109560000	109580000	1.02391	-0.314759	1.33867	-	-	-	-	-	-
Liver-specific A compartments	4	111380000	111400000	0.931629	-0.823532	1.75516	-	-	-	-	-	-
Liver-specific A compartments	4	111400000	111420000	0.878594	-0.741269	1.61986	-	-	-	-	-	-
Liver-specific A compartments	4	111420000	111440000	0.858494	-0.91681	1.7753	-	-	-	-	-	-
Liver-specific A compartments	4	111440000	111460000	0.935993	-0.55552	1.49151	-	-	-	-	-	-
Liver-specific A compartments	4	117020000	117040000	0.51466	-0.591022	1.10568	-	-	-	-	-	-
Liver-specific A compartments	4	117040000	117060000	0.699808	-0.432733	1.13254	-	-	-	-	-	-
Liver-specific A compartments	4	117100000	117120000	0.826539	-0.223755	1.05029	-	-	-	-	-	-
Liver-specific A compartments	4	117120000	117140000	0.728404	-0.559335	1.28774	-	-	-	-	-	-
Liver-specific A compartments	4	117140000	117160000	0.594796	-0.50049	1.09529	-	-	-	-	-	-
Liver-specific A compartments	4	122180000	122200000	0.476868	-0.485465	0.962332	-	-	-	-	-	-
Liver-specific A compartments	4	124500000	124520000	2.59421	-0.527876	3.12209	-	-	-	-	-	-
Liver-specific A compartments	4	124540000	124560000	2.28979	-0.794842	3.08463	-	-	-	-	-	-
Liver-specific A compartments	4	124560000	124580000	2.35597	-0.816839	3.1728	-	-	-	-	-	-
Liver-specific A compartments	4	124580000	124600000	2.11878	-1.1183	3.23708	-	-	-	-	-	-
Liver-specific A compartments	4	124600000	124620000	2.14679	-1.16376	3.31054	-	-	-	-	-	-
Liver-specific A compartments	4	124620000	124640000	2.12909	-0.991221	3.12031	ENSSSCG00000006902	GFI1	2.44	0.22	3.83053	1.52537e-07
Liver-specific A compartments	4	124640000	124660000	2.06258	-1.26104	3.32362	-	-	-	-	-	-
Liver-specific A compartments	4	124660000	124680000	2.10459	-0.87041	2.975	-	-	-	-	-	-
Liver-specific A compartments	4	124700000	124720000	2.33428	-0.589359	2.92364	-	-	-	-	-	-
Liver-specific A compartments	4	124800000	124820000	1.58925	-0.971716	2.56096	-	-	-	-	-	-
Liver-specific A compartments	4	124820000	124840000	1.24206	-1.37191	2.61397	ENSSSCG00000042806	C1ORF146	0.79	0.55	1.22556	0.285652
Liver-specific A compartments	4	124840000	124860000	1.22285	-1.62365	2.84649	-	-	-	-	-	-
Liver-specific A compartments	4	124860000	124880000	1.22568	-1.78731	3.01299	-	-	-	-	-	-
Liver-specific A compartments	4	124880000	124900000	1.2262	-1.76686	2.99306	-	-	-	-	-	-
Liver-specific A compartments	4	124900000	124920000	1.27014	-1.69277	2.96292	-	-	-	-	-	-
Liver-specific A compartments	4	124920000	124940000	1.32107	-1.28968	2.61075	-	-	-	-	-	-
Liver-specific A compartments	4	124940000	124960000	1.4189	-0.926799	2.34569	ENSSSCG00000035196	BTBD8	4.15	7.17	-0.660449	0.059965
Liver-specific A compartments	4	124960000	124980000	1.26713	-1.32043	2.58756	-	-	-	-	-	-
Liver-specific A compartments	4	124980000	125000000	1.01494	-1.65348	2.66841	ENSSSCG00000032057	EPHX4	0.02	0.02	-	-
Liver-specific A compartments	4	125000000	125020000	1.00225	-1.57215	2.57439	-	-	-	-	-	-
Liver-specific A compartments	4	125020000	125040000	1.10799	-1.26237	2.37036	-	-	-	-	-	-
Liver-specific A compartments	4	125040000	125060000	1.0902	-0.966772	2.05697	-	-	-	-	-	-
Liver-specific A compartments	4	127300000	127320000	1.45364	-0.764126	2.21777	-	-	-	-	-	-
Liver-specific A compartments	5	12760000	12780000	1.38135	-0.539852	1.9212	-	-	-	-	-	-
Liver-specific A compartments	5	12780000	12800000	1.32578	-0.657913	1.98369	-	-	-	-	-	-
Liver-specific A compartments	5	12800000	12820000	1.12032	-0.633787	1.7541	-	-	-	-	-	-
Liver-specific A compartments	5	12820000	12840000	1.03266	-1.16608	2.19875	-	-	-	-	-	-
Liver-specific A compartments	5	12840000	12860000	0.976786	-1.06426	2.04104	-	-	-	-	-	-
Liver-specific A compartments	5	12860000	12880000	1.20396	-1.30612	2.51007	-	-	-	-	-	-
Liver-specific A compartments	5	12880000	12900000	1.07235	-1.24365	2.316	-	-	-	-	-	-
Liver-specific A compartments	5	12900000	12920000	1.02062	-1.26283	2.28344	-	-	-	-	-	-
Liver-specific A compartments	5	12920000	12940000	1.02118	-1.06052	2.08169	-	-	-	-	-	-
Liver-specific A compartments	5	12940000	12960000	0.976347	-1.23214	2.20849	-	-	-	-	-	-
Liver-specific A compartments	5	12960000	12980000	1.00408	-1.48766	2.49174	-	-	-	-	-	-
Liver-specific A compartments	5	12980000	13000000	1.06188	-1.2723	2.33419	-	-	-	-	-	-
Liver-specific A compartments	5	13000000	13020000	1.09899	-1.21523	2.31422	-	-	-	-	-	-
Liver-specific A compartments	5	13020000	13040000	1.08726	-1.38135	2.46861	-	-	-	-	-	-
Liver-specific A compartments	5	13040000	13060000	0.931594	-1.46981	2.40141	-	-	-	-	-	-
Liver-specific A compartments	5	13060000	13080000	0.911763	-1.09411	2.00587	ENSSSCG00000000162	BTBD11	0.92	2.8	-1.48898	3.21629e-06
Liver-specific A compartments	5	13080000	13100000	0.871298	-1.75165	2.62295	-	-	-	-	-	-
Liver-specific A compartments	5	13100000	13120000	0.788622	-1.6894	2.47802	-	-	-	-	-	-
Liver-specific A compartments	5	13120000	13140000	0.831156	-1.73026	2.56141	-	-	-	-	-	-
Liver-specific A compartments	5	13140000	13160000	0.750338	-1.43552	2.18586	-	-	-	-	-	-
Liver-specific A compartments	5	13160000	13180000	0.696948	-1.48191	2.17886	-	-	-	-	-	-
Liver-specific A compartments	5	13180000	13200000	0.863536	-1.23688	2.10041	-	-	-	-	-	-
Liver-specific A compartments	5	13200000	13220000	0.958324	-1.35375	2.31207	-	-	-	-	-	-
Liver-specific A compartments	5	13220000	13240000	1.03028	-0.900641	1.93092	-	-	-	-	-	-
Liver-specific A compartments	5	33140000	33160000	0.846279	-0.486667	1.33295	-	-	-	-	-	-
Liver-specific A compartments	5	33160000	33180000	0.658698	-0.829378	1.48808	-	-	-	-	-	-
Liver-specific A compartments	5	41760000	41780000	0.54164	-0.531174	1.07281	-	-	-	-	-	-
Liver-specific A compartments	5	41800000	41820000	0.521429	-0.731934	1.25336	-	-	-	-	-	-
Liver-specific A compartments	5	51040000	51060000	0.313635	-1.27252	1.58615	ENSSSCG00000000570	C2CD5	51.89	60.9	-0.10743	0.517217
Liver-specific A compartments	5	51060000	51080000	0.241307	-1.54333	1.78464	-	-	-	-	-	-
Liver-specific A compartments	5	51080000	51100000	0.316928	-1.4139	1.73082	-	-	-	-	-	-
Liver-specific A compartments	5	51100000	51120000	0.298425	-1.53681	1.83524	-	-	-	-	-	-
Liver-specific A compartments	5	51120000	51140000	0.319632	-1.74834	2.06797	-	-	-	-	-	-
Liver-specific A compartments	5	51140000	51160000	0.321267	-2.31438	2.63564	ENSSSCG00000043201	Unknown	0.66	1.51	-0.889012	0.00879609
Liver-specific A compartments	5	51160000	51180000	0.300651	-2.73423	3.03488	-	-	-	-	-	-
Liver-specific A compartments	5	51200000	51220000	0.338976	-2.52613	2.86511	ENSSSCG00000031329	ST8SIA1	23.28	4.95	2.33506	4.98514e-20
Liver-specific A compartments	5	51220000	51240000	0.376084	-2.47049	2.84658	-	-	-	-	-	-
Liver-specific A compartments	5	51240000	51260000	0.33519	-2.68296	3.01815	-	-	-	-	-	-
Liver-specific A compartments	5	51260000	51280000	0.290896	-2.71592	3.00682	-	-	-	-	-	-
Liver-specific A compartments	5	51280000	51300000	0.239417	-2.58509	2.82451	-	-	-	-	-	-
Liver-specific A compartments	5	51420000	51440000	0.181327	-2.27125	2.45258	-	-	-	-	-	-
Liver-specific A compartments	5	51440000	51460000	0.621439	-1.60531	2.22675	ENSSSCG00000034733	CMAS	162.41	39.35	2.11617	1.16039e-20
Liver-specific A compartments	5	51460000	51480000	0.381938	-1.71536	2.0973	-	-	-	-	-	-
Liver-specific A compartments	5	51780000	51800000	0.288314	-1.67592	1.96423	-	-	-	-	-	-
Liver-specific A compartments	5	51800000	51820000	0.446068	-1.32999	1.77606	ENSSSCG00000000576;ENSSSCG00000038537	AC010197.2;AAMDC	2985.49;0.16	1402.27;0	0.936378650578856;-	6.53826152508243e-06;-
Liver-specific A compartments	5	51840000	51860000	0.247449	-1.99621	2.24365	-	-	-	-	-	-
Liver-specific A compartments	5	51860000	51880000	0.471869	-2.25788	2.72975	ENSSSCG00000000577	GYS2	368.85	0.36	9.95486	4.39801e-169
Liver-specific A compartments	5	51880000	51900000	0.341972	-2.41179	2.75376	-	-	-	-	-	-
Liver-specific A compartments	5	51900000	51920000	0.416136	-2.20079	2.61692	-	-	-	-	-	-
Liver-specific A compartments	5	51920000	51940000	0.416978	-1.72621	2.14318	ENSSSCG00000032123	SPX	28.26	4.22	2.81094	NA
Liver-specific A compartments	5	51940000	51960000	0.479727	-1.70505	2.18478	ENSSSCG00000000579;ENSSSCG00000000580	GOLT1B;RECQL	95.03;39.57	49.72;25.59	1.00858049630139;0.725228136558841	6.87185228766272e-05;0.00233767878914177
Liver-specific A compartments	5	60380000	60400000	0.455934	-0.388126	0.84406	-	-	-	-	-	-
Liver-specific A compartments	5	60400000	60420000	0.611746	-0.73169	1.34344	-	-	-	-	-	-
Liver-specific A compartments	5	60420000	60440000	0.515259	-0.764464	1.27972	-	-	-	-	-	-
Liver-specific A compartments	5	60440000	60460000	0.502688	-0.959565	1.46225	-	-	-	-	-	-
Liver-specific A compartments	5	60460000	60480000	0.549979	-0.832576	1.38256	-	-	-	-	-	-
Liver-specific A compartments	5	60480000	60500000	0.533963	-1.09605	1.63002	-	-	-	-	-	-
Liver-specific A compartments	5	60500000	60520000	0.621729	-0.894066	1.51579	-	-	-	-	-	-
Liver-specific A compartments	5	60520000	60540000	0.828575	-0.568904	1.39748	-	-	-	-	-	-
Liver-specific A compartments	5	60540000	60560000	0.952839	-0.45109	1.40393	-	-	-	-	-	-
Liver-specific A compartments	5	60800000	60820000	0.327221	-1.05125	1.37848	-	-	-	-	-	-
Liver-specific A compartments	5	62100000	62120000	0.445264	-5.06583	5.51109	ENSSSCG00000034555	CLECL1	85.34	15.56	2.69604	3.3874e-05
Liver-specific A compartments	5	62120000	62140000	0.865955	-4.58255	5.44851	-	-	-	-	-	-
Liver-specific A compartments	5	62140000	62160000	1.12716	-4.54452	5.67169	-	-	-	-	-	-
Liver-specific A compartments	5	62160000	62180000	1.14853	-4.30399	5.45252	-	-	-	-	-	-
Liver-specific A compartments	5	62180000	62200000	1.17521	-4.22502	5.40022	-	-	-	-	-	-
Liver-specific A compartments	5	62200000	62220000	1.31424	-4.09508	5.40933	-	-	-	-	-	-
Liver-specific A compartments	5	62220000	62240000	1.17578	-4.46154	5.63731	ENSSSCG00000000657	Unknown	359.08	124.99	1.63618	3.35805e-05
Liver-specific A compartments	5	62240000	62260000	1.0126	-4.4851	5.4977	ENSSSCG00000039708	KLRB1	18.33	0.22	7.5264	3.21262e-12
Liver-specific A compartments	5	62260000	62280000	0.879709	-4.75592	5.63563	ENSSSCG00000000659	Unknown	0.83	0.35	1.60843	0.00362466
Liver-specific A compartments	5	62280000	62300000	1.03855	-5.07854	6.11709	-	-	-	-	-	-
Liver-specific A compartments	5	62300000	62320000	1.03957	-5.23193	6.2715	-	-	-	-	-	-
Liver-specific A compartments	5	62320000	62340000	1.13471	-5.31049	6.44521	-	-	-	-	-	-
Liver-specific A compartments	5	62340000	62360000	1.16031	-5.32356	6.48387	ENSSSCG00000024402	Unknown	5675.91	0.75	12.8156	3.71774e-25
Liver-specific A compartments	5	62360000	62380000	1.22834	-5.29164	6.51998	-	-	-	-	-	-
Liver-specific A compartments	5	62380000	62400000	1.1651	-5.19336	6.35847	-	-	-	-	-	-
Liver-specific A compartments	5	62400000	62420000	1.282	-5.10318	6.38518	-	-	-	-	-	-
Liver-specific A compartments	5	62420000	62440000	1.3202	-5.08554	6.40574	ENSSSCG00000000660	A2M	2641.38	5.69	8.93338	3.6066e-77
Liver-specific A compartments	5	62440000	62460000	1.25367	-4.86316	6.11683	-	-	-	-	-	-
Liver-specific A compartments	5	62460000	62480000	1.22518	-4.68711	5.91229	-	-	-	-	-	-
Liver-specific A compartments	5	62480000	62500000	1.20125	-4.178	5.37926	-	-	-	-	-	-
Liver-specific A compartments	5	62500000	62520000	1.26909	-4.059	5.32809	-	-	-	-	-	-
Liver-specific A compartments	5	62520000	62540000	1.26467	-3.62988	4.89454	ENSSSCG00000000663	KLRG1	3.99	0.83	2.82143	0.00790246
Liver-specific A compartments	5	62540000	62560000	1.62421	-2.56056	4.18477	ENSSSCG00000040743	M6PR	111.42	85.62	0.539301	0.00523571
Liver-specific A compartments	5	62560000	62580000	1.43843	-2.32905	3.76748	-	-	-	-	-	-
Liver-specific A compartments	5	62580000	62600000	0.995376	-2.56985	3.56523	ENSSSCG00000000661	PHC1	3.88	8.25	-0.987778	0.000118746
Liver-specific A compartments	5	62600000	62620000	0.879612	-3.00533	3.88495	-	-	-	-	-	-
Liver-specific A compartments	5	62620000	62640000	0.701495	-3.07146	3.77295	-	-	-	-	-	-
Liver-specific A compartments	5	62680000	62700000	0.586071	-2.81378	3.39985	-	-	-	-	-	-
Liver-specific A compartments	5	62720000	62740000	0.566743	-2.45786	3.0246	-	-	-	-	-	-
Liver-specific A compartments	5	62760000	62780000	0.403505	-2.82506	3.22857	ENSSSCG00000000667	AICDA	0.32	0.73	-0.950392	0.0475077
Liver-specific A compartments	5	63000000	63020000	0.691567	-1.88862	2.58019	-	-	-	-	-	-
Liver-specific A compartments	5	63060000	63080000	0.774297	-0.971399	1.7457	ENSSSCG00000039580	FOXJ2	4.19	15.86	-1.83957	8.45026e-20
Liver-specific A compartments	5	63520000	63540000	1.53533	-1.13308	2.66842	-	-	-	-	-	-
Liver-specific A compartments	5	79580000	79600000	1.88684	-0.447349	2.33419	ENSSSCG00000000838	SLC41A2	189.54	11.77	4.04098	9.87001e-88
Liver-specific A compartments	5	79600000	79620000	1.53459	-1.02057	2.55516	-	-	-	-	-	-
Liver-specific A compartments	5	79620000	79640000	1.31172	-1.23628	2.548	-	-	-	-	-	-
Liver-specific A compartments	5	79640000	79660000	1.30039	-1.3296	2.62998	-	-	-	-	-	-
Liver-specific A compartments	5	79660000	79680000	1.26858	-1.40786	2.67644	-	-	-	-	-	-
Liver-specific A compartments	5	79680000	79700000	1.16063	-1.61628	2.77691	-	-	-	-	-	-
Liver-specific A compartments	5	79700000	79720000	0.979253	-1.8095	2.78876	-	-	-	-	-	-
Liver-specific A compartments	5	79720000	79740000	0.879641	-1.78399	2.66363	-	-	-	-	-	-
Liver-specific A compartments	5	79740000	79760000	0.832347	-2.00512	2.83747	-	-	-	-	-	-
Liver-specific A compartments	5	79760000	79780000	0.83707	-1.82176	2.65883	ENSSSCG00000044566	Unknown	0.99	1.11	0.00179096	0.999249
Liver-specific A compartments	5	79780000	79800000	0.802507	-1.62391	2.42641	-	-	-	-	-	-
Liver-specific A compartments	5	79800000	79820000	0.868969	-1.30442	2.17338	-	-	-	-	-	-
Liver-specific A compartments	5	79820000	79840000	1.17821	-1.07406	2.25227	-	-	-	-	-	-
Liver-specific A compartments	5	79840000	79860000	1.08015	-0.874382	1.95454	-	-	-	-	-	-
Liver-specific A compartments	5	79860000	79880000	1.13635	-0.788186	1.92453	-	-	-	-	-	-
Liver-specific A compartments	5	79880000	79900000	1.0886	-0.860801	1.9494	-	-	-	-	-	-
Liver-specific A compartments	5	79900000	79920000	1.19055	-0.7	1.89055	-	-	-	-	-	-
Liver-specific A compartments	5	79920000	79940000	1.18054	-0.422997	1.60354	-	-	-	-	-	-
Liver-specific A compartments	5	79940000	79960000	1.19615	-0.433746	1.62989	-	-	-	-	-	-
Liver-specific A compartments	5	79960000	79980000	1.13431	-0.521025	1.65533	-	-	-	-	-	-
Liver-specific A compartments	5	79980000	80000000	1.22534	-0.817992	2.04333	-	-	-	-	-	-
Liver-specific A compartments	5	80000000	80020000	1.22057	-0.768443	1.98902	-	-	-	-	-	-
Liver-specific A compartments	5	80020000	80040000	1.35557	-0.721769	2.07733	-	-	-	-	-	-
Liver-specific A compartments	5	80040000	80060000	1.44949	-0.548239	1.99773	-	-	-	-	-	-
Liver-specific A compartments	5	80060000	80080000	1.40719	-0.608947	2.01614	ENSSSCG00000000837	CHST11	2.27	1.84	0.521264	0.0180087
Liver-specific A compartments	5	80080000	80100000	1.24414	-0.939596	2.18373	-	-	-	-	-	-
Liver-specific A compartments	5	80100000	80120000	1.16354	-0.792415	1.95596	-	-	-	-	-	-
Liver-specific A compartments	5	80120000	80140000	1.33473	-0.717693	2.05242	-	-	-	-	-	-
Liver-specific A compartments	5	80140000	80160000	1.47438	-0.446191	1.92057	-	-	-	-	-	-
Liver-specific A compartments	5	80700000	80720000	2.1057	-0.506425	2.61212	-	-	-	-	-	-
Liver-specific A compartments	5	80720000	80740000	1.70093	-0.850901	2.55183	-	-	-	-	-	-
Liver-specific A compartments	5	80740000	80760000	1.40467	-1.34447	2.74914	-	-	-	-	-	-
Liver-specific A compartments	5	80760000	80780000	1.47352	-1.48119	2.95471	-	-	-	-	-	-
Liver-specific A compartments	5	80780000	80800000	1.39457	-1.48616	2.88072	-	-	-	-	-	-
Liver-specific A compartments	5	80800000	80820000	1.25124	-1.45871	2.70995	-	-	-	-	-	-
Liver-specific A compartments	5	80820000	80840000	1.22808	-1.36173	2.58981	-	-	-	-	-	-
Liver-specific A compartments	5	80840000	80860000	1.03139	-2.0023	3.03369	ENSSSCG00000000854	STAB2	114.78	0.38	8.29227	2.7635e-67
Liver-specific A compartments	5	80860000	80880000	0.876467	-2.25447	3.13093	-	-	-	-	-	-
Liver-specific A compartments	5	82120000	82140000	0.378451	-1.729	2.10745	-	-	-	-	-	-
Liver-specific A compartments	5	82140000	82160000	0.511075	-1.27054	1.78161	ENSSSCG00000036075	WASHC3	176.92	120.16	0.618109	0.000500884
Liver-specific A compartments	5	82160000	82180000	0.45472	-1.3159	1.77062	-	-	-	-	-	-
Liver-specific A compartments	5	82200000	82220000	0.399853	-1.71829	2.11814	-	-	-	-	-	-
Liver-specific A compartments	5	87380000	87400000	0.541424	-0.585477	1.1269	-	-	-	-	-	-
Liver-specific A compartments	5	87400000	87420000	0.757897	-0.527612	1.28551	-	-	-	-	-	-
Liver-specific A compartments	5	87420000	87440000	0.912741	-0.464153	1.37689	-	-	-	-	-	-
Liver-specific A compartments	5	87700000	87720000	1.73972	-0.933868	2.67359	-	-	-	-	-	-
Liver-specific A compartments	5	87740000	87760000	1.89374	-0.783627	2.67737	-	-	-	-	-	-
Liver-specific A compartments	5	87760000	87780000	1.97111	-0.959668	2.93078	-	-	-	-	-	-
Liver-specific A compartments	5	87780000	87800000	2.13543	-0.54911	2.68454	-	-	-	-	-	-
Liver-specific A compartments	5	101640000	101660000	0.625886	-0.763255	1.38914	-	-	-	-	-	-
Liver-specific A compartments	5	101660000	101680000	1.09736	-0.418827	1.51619	-	-	-	-	-	-
Liver-specific A compartments	5	101680000	101700000	1.05361	-0.806884	1.86049	ENSSSCG00000036560	PAWR	73.62	4.51	4.05756	6.55818e-47
Liver-specific A compartments	5	101700000	101720000	1.22679	-1.11686	2.34364	-	-	-	-	-	-
Liver-specific A compartments	5	101720000	101740000	1.21711	-1.2158	2.43291	-	-	-	-	-	-
Liver-specific A compartments	5	101740000	101760000	0.91307	-1.69944	2.61251	-	-	-	-	-	-
Liver-specific A compartments	5	101760000	101780000	0.907877	-1.80102	2.7089	-	-	-	-	-	-
Liver-specific A compartments	5	101780000	101800000	0.704318	-1.62949	2.33381	-	-	-	-	-	-
Liver-specific A compartments	5	101800000	101820000	0.573284	-1.34909	1.92238	-	-	-	-	-	-
Liver-specific A compartments	6	6280000	6300000	1.02564	-0.553236	1.57887	-	-	-	-	-	-
Liver-specific A compartments	6	6300000	6320000	1.23012	-0.764237	1.99436	-	-	-	-	-	-
Liver-specific A compartments	6	6320000	6340000	1.21695	-0.877533	2.09449	-	-	-	-	-	-
Liver-specific A compartments	6	6340000	6360000	1.46244	-0.813646	2.27609	-	-	-	-	-	-
Liver-specific A compartments	6	6360000	6380000	1.62082	-0.660038	2.28085	ENSSSCG00000038221	HSD17B2	437.02	0.16	11.5397	3.21001e-19
Liver-specific A compartments	6	7340000	7360000	0.935538	-1.16588	2.10142	-	-	-	-	-	-
Liver-specific A compartments	6	7360000	7380000	0.725307	-1.31247	2.03778	-	-	-	-	-	-
Liver-specific A compartments	6	7380000	7400000	0.552506	-0.929082	1.48159	-	-	-	-	-	-
Liver-specific A compartments	6	7420000	7440000	0.620836	-0.797746	1.41858	ENSSSCG00000038128	CDYL2	2.36	3.26	-0.37378	0.185729
Liver-specific A compartments	6	7760000	7780000	0.430389	-0.474049	0.904437	-	-	-	-	-	-
Liver-specific A compartments	6	8020000	8040000	0.238263	-0.20418	0.442443	-	-	-	-	-	-
Liver-specific A compartments	6	8040000	8060000	0.326158	-0.406628	0.732786	-	-	-	-	-	-
Liver-specific A compartments	6	8180000	8200000	0.416675	-0.233503	0.650179	-	-	-	-	-	-
Liver-specific A compartments	6	13820000	13840000	0.998434	-0.414098	1.41253	-	-	-	-	-	-
Liver-specific A compartments	6	13840000	13860000	0.787347	-0.691898	1.47924	-	-	-	-	-	-
Liver-specific A compartments	6	13860000	13880000	0.413299	-1.02432	1.43762	-	-	-	-	-	-
Liver-specific A compartments	6	14320000	14340000	0.537197	-1.52457	2.06177	ENSSSCG00000033156;ENSSSCG00000040973	CMTR2;HYDIN	27.32;1.38	16.94;1.06	0.822740266611373;0.45868630262537	0.000118750189691101;0.174352028794008
Liver-specific A compartments	6	14340000	14360000	0.399893	-1.69589	2.09578	-	-	-	-	-	-
Liver-specific A compartments	6	14420000	14440000	0.439036	-2.36121	2.80024	-	-	-	-	-	-
Liver-specific A compartments	6	14440000	14460000	0.470415	-2.06322	2.53363	ENSSSCG00000043891	TLE7	0.02	0	-	-
Liver-specific A compartments	6	14460000	14480000	0.549545	-2.46804	3.01759	-	-	-	-	-	-
Liver-specific A compartments	6	14480000	14500000	0.520249	-1.91115	2.4314	ENSSSCG00000002738	ZNF23	12.74	10.99	0.369152	0.0218371
Liver-specific A compartments	6	14500000	14520000	0.41428	-2.33058	2.74486	-	-	-	-	-	-
Liver-specific A compartments	6	14520000	14540000	0.602205	-2.66893	3.27113	ENSSSCG00000002737	CHST4	0.57	0.95	-0.614706	0.0689867
Liver-specific A compartments	6	14540000	14560000	0.732446	-2.95749	3.68994	-	-	-	-	-	-
Liver-specific A compartments	6	14560000	14580000	1.26905	-2.56723	3.83628	-	-	-	-	-	-
Liver-specific A compartments	6	14580000	14600000	1.45265	-2.57326	4.02591	ENSSSCG00000002736	TAT	1013.45	0.06	14.0709	5.80725e-34
Liver-specific A compartments	6	14600000	14620000	0.99841	-2.20072	3.19913	ENSSSCG00000002734	MARVELD3	7.89	0.06	7.69195	3.87422e-17
Liver-specific A compartments	6	14620000	14640000	0.857784	-1.67285	2.53063	-	-	-	-	-	-
Liver-specific A compartments	6	14640000	14660000	0.840049	-1.18355	2.0236	-	-	-	-	-	-
Liver-specific A compartments	6	14660000	14680000	0.992583	-1.01115	2.00373	-	-	-	-	-	-
Liver-specific A compartments	6	14680000	14700000	1.19403	-0.568384	1.76242	-	-	-	-	-	-
Liver-specific A compartments	6	15000000	15020000	0.966424	-0.438113	1.40454	-	-	-	-	-	-
Liver-specific A compartments	6	18180000	18200000	1.41294	-0.406546	1.81949	-	-	-	-	-	-
Liver-specific A compartments	6	18200000	18220000	1.23681	-0.673014	1.90982	-	-	-	-	-	-
Liver-specific A compartments	6	18220000	18240000	0.965459	-0.932711	1.89817	ENSSSCG00000023162	CDH3	0.59	0.98	-0.551239	0.239779
Liver-specific A compartments	6	18240000	18260000	0.861001	-1.29709	2.15809	-	-	-	-	-	-
Liver-specific A compartments	6	18260000	18280000	0.931774	-1.18326	2.11503	-	-	-	-	-	-
Liver-specific A compartments	6	18280000	18300000	0.942213	-0.948135	1.89035	-	-	-	-	-	-
Liver-specific A compartments	6	18300000	18320000	1.17838	-0.791592	1.96998	-	-	-	-	-	-
Liver-specific A compartments	6	18340000	18360000	0.990688	-1.22117	2.21186	-	-	-	-	-	-
Liver-specific A compartments	6	18520000	18540000	1.39368	-0.44612	1.8398	-	-	-	-	-	-
Liver-specific A compartments	6	29080000	29100000	2.58375	-0.502593	3.08635	-	-	-	-	-	-
Liver-specific A compartments	6	29220000	29240000	2.61484	-2.13385	4.74869	-	-	-	-	-	-
Liver-specific A compartments	6	29260000	29280000	1.22005	-1.90293	3.12298	-	-	-	-	-	-
Liver-specific A compartments	6	29280000	29300000	1.60107	-1.3193	2.92037	-	-	-	-	-	-
Liver-specific A compartments	6	29300000	29320000	1.81294	-0.277548	2.09049	-	-	-	-	-	-
Liver-specific A compartments	6	29460000	29480000	0.997071	-0.425089	1.42216	-	-	-	-	-	-
Liver-specific A compartments	6	29520000	29540000	0.962022	-0.476511	1.43853	-	-	-	-	-	-
Liver-specific A compartments	6	29540000	29560000	0.812004	-0.346224	1.15823	-	-	-	-	-	-
Liver-specific A compartments	6	29560000	29580000	0.843088	-0.608533	1.45162	-	-	-	-	-	-
Liver-specific A compartments	6	29580000	29600000	0.701537	-0.791435	1.49297	ENSSSCG00000034192	GNAO1	0.26	0.8	-1.90982	1.79751e-08
Liver-specific A compartments	6	29820000	29840000	0.562774	-1.79171	2.35448	-	-	-	-	-	-
Liver-specific A compartments	6	29840000	29860000	0.694344	-2.33422	3.02857	ENSSSCG00000034721	CES5A	1.78	0.5	2.13562	0.00720619
Liver-specific A compartments	6	29880000	29900000	1.31075	-1.77496	3.08571	-	-	-	-	-	-
Liver-specific A compartments	6	29900000	29920000	1.29013	-1.32836	2.61849	ENSSSCG00000002825	Unknown	681.14	1.16	9.10569	4.23897e-30
Liver-specific A compartments	6	29920000	29940000	1.07382	-0.984401	2.05822	-	-	-	-	-	-
Liver-specific A compartments	6	29940000	29960000	1.07718	-0.676166	1.75335	-	-	-	-	-	-
Liver-specific A compartments	6	29960000	29980000	0.893015	-0.476371	1.36939	-	-	-	-	-	-
Liver-specific A compartments	6	29980000	30000000	0.886542	-0.584588	1.47113	ENSSSCG00000002827	SLC6A2	0.15	0.51	-1.731	0.0125607
Liver-specific A compartments	6	30000000	30020000	0.939404	-0.606858	1.54626	-	-	-	-	-	-
Liver-specific A compartments	6	30100000	30120000	0.535032	-0.866161	1.40119	-	-	-	-	-	-
Liver-specific A compartments	6	34000000	34020000	0.446972	-1.10213	1.5491	-	-	-	-	-	-
Liver-specific A compartments	6	34020000	34040000	0.706898	-0.459954	1.16685	-	-	-	-	-	-
Liver-specific A compartments	6	37600000	37620000	0.512327	-0.374961	0.887287	-	-	-	-	-	-
Liver-specific A compartments	6	37620000	37640000	0.470244	-0.603236	1.07348	-	-	-	-	-	-
Liver-specific A compartments	6	37640000	37660000	0.774282	-0.629073	1.40336	-	-	-	-	-	-
Liver-specific A compartments	6	37660000	37680000	1.07462	-0.401735	1.47636	ENSSSCG00000002847	GPT2	298.82	5.49	5.48389	4.84045e-28
Liver-specific A compartments	6	37680000	37700000	0.692296	-0.983229	1.67552	-	-	-	-	-	-
Liver-specific A compartments	6	37740000	37760000	0.572547	-0.950867	1.52341	-	-	-	-	-	-
Liver-specific A compartments	6	37760000	37780000	0.728783	-0.647718	1.3765	-	-	-	-	-	-
Liver-specific A compartments	6	37800000	37820000	0.870268	-0.436056	1.30632	-	-	-	-	-	-
Liver-specific A compartments	6	37820000	37840000	0.546315	-0.954085	1.5004	-	-	-	-	-	-
Liver-specific A compartments	6	37840000	37860000	0.392091	-0.860995	1.25309	ENSSSCG00000036874	MYLK3	0.2	5.67	-5.01523	3.25616e-34
Liver-specific A compartments	6	37920000	37940000	0.528203	-0.656073	1.18428	-	-	-	-	-	-
Liver-specific A compartments	6	37980000	38000000	0.284004	-0.780649	1.06465	-	-	-	-	-	-
Liver-specific A compartments	6	56300000	56320000	2.03287	-0.7002	2.73307	ENSSSCG00000003248	Unknown	0.52	0.1	3.11132	0.012222
Liver-specific A compartments	6	56320000	56340000	1.66045	-1.26848	2.92893	ENSSSCG00000035665	Unknown	0.34	0.05	-	-
Liver-specific A compartments	6	56340000	56360000	1.58471	-1.79879	3.3835	ENSSSCG00000003247;ENSSSCG00000039465	Unknown;Unknown	1.56;0.97	0;0.15	7.50126493138584;3.05061765097506	4.30589038704471e-07;0.0113400662533399
Liver-specific A compartments	6	56360000	56380000	1.5652	-2.23224	3.79744	-	-	-	-	-	-
Liver-specific A compartments	6	56380000	56400000	1.37106	-2.68518	4.05624	ENSSSCG00000032113	Unknown	4.88	2.61	1.0254	6.12704e-05
Liver-specific A compartments	6	56400000	56420000	1.30643	-2.69684	4.00327	ENSSSCG00000003251	NLRP12	0.34	0.28	-	-
Liver-specific A compartments	6	56420000	56440000	1.07287	-2.80955	3.88242	-	-	-	-	-	-
Liver-specific A compartments	6	56440000	56460000	1.32063	-3.04649	4.36712	ENSSSCG00000038825;ENSSSCG00000042026	Unknown;Unknown	33.58;1.75	8.96;1.39	2.00588481981069;0.477099007843669	8.84274310746781e-15;0.0918886102506463
Liver-specific A compartments	6	56460000	56480000	1.50113	-3.15531	4.65645	-	-	-	-	-	-
Liver-specific A compartments	6	56480000	56500000	1.65733	-3.08367	4.741	-	-	-	-	-	-
Liver-specific A compartments	6	56500000	56520000	1.8178	-2.98421	4.802	-	-	-	-	-	-
Liver-specific A compartments	6	56520000	56540000	2.19407	-2.48154	4.6756	-	-	-	-	-	-
Liver-specific A compartments	6	56540000	56560000	2.64197	-2.13876	4.78073	ENSSSCG00000032690	Unknown	0.44	0.05	-	-
Liver-specific A compartments	6	56560000	56580000	2.29797	-1.73796	4.03592	ENSSSCG00000046881	DPRX	0.52	1.01	-0.7455	0.109225
Liver-specific A compartments	6	56580000	56600000	1.94952	-1.01085	2.96037	-	-	-	-	-	-
Liver-specific A compartments	6	56620000	56640000	1.39667	-1.34784	2.74451	-	-	-	-	-	-
Liver-specific A compartments	6	56640000	56660000	1.03951	-1.68273	2.72224	ENSSSCG00000039638	Unknown	0.5	0.02	-	-
Liver-specific A compartments	6	56660000	56680000	0.916374	-2.48314	3.39951	-	-	-	-	-	-
Liver-specific A compartments	6	56680000	56700000	0.872575	-2.72941	3.60199	-	-	-	-	-	-
Liver-specific A compartments	6	56700000	56720000	0.769583	-2.82812	3.5977	ENSSSCG00000042197	Unknown	0	0	-	-
Liver-specific A compartments	6	56720000	56740000	0.61824	-3.10284	3.72108	-	-	-	-	-	-
Liver-specific A compartments	6	56840000	56860000	0.43972	-2.03805	2.47777	-	-	-	-	-	-
Liver-specific A compartments	6	56860000	56880000	0.629766	-1.31139	1.94115	ENSSSCG00000008849	Unknown	332.2	62.47	2.41931	6.40942e-17
Liver-specific A compartments	6	56880000	56900000	0.39126	-1.56551	1.95677	-	-	-	-	-	-
Liver-specific A compartments	6	56960000	56980000	0.527079	-0.852023	1.3791	-	-	-	-	-	-
Liver-specific A compartments	6	56980000	57000000	0.872728	-0.536663	1.40939	ENSSSCG00000027741;ENSSSCG00000032978;ENSSSCG00000041243;ENSSSCG00000044698	ZNF835;Unknown;FRG2C;Unknown	14.09;7.37;0.05;5.32	13.62;25.59;0;10.54	0.170403359925088;-1.69751537002416;-;-1.02354251780015	0.203807662947029;2.65547387808054e-12;-;0.116680885996352
Liver-specific A compartments	6	57280000	57300000	0.777908	-0.884668	1.66258	-	-	-	-	-	-
Liver-specific A compartments	6	57400000	57420000	0.898423	-0.541437	1.43986	ENSSSCG00000032023;ENSSSCG00000047997	Unknown;Unknown	10.4;0.88	14.36;2.21	-0.409982203759217;-1.14069654751577	0.0293460830424479;0.000191502704261832
Liver-specific A compartments	6	57420000	57440000	0.402272	-1.05557	1.45784	-	-	-	-	-	-
Liver-specific A compartments	6	57700000	57720000	0.552154	-0.444975	0.997129	ENSSSCG00000046422;ENSSSCG00000048664	Unknown;Unknown	9.54;0.01	31.16;0	-1.6199243567876;-	8.85300329358483e-11;-
Liver-specific A compartments	6	57720000	57740000	0.612214	-0.270055	0.882269	-	-	-	-	-	-
Liver-specific A compartments	6	57860000	57880000	0.48242	-1.71904	2.20146	-	-	-	-	-	-
Liver-specific A compartments	6	57880000	57900000	0.637494	-1.33699	1.97448	-	-	-	-	-	-
Liver-specific A compartments	6	57900000	57920000	1.06692	-0.578749	1.64567	-	-	-	-	-	-
Liver-specific A compartments	6	58920000	58940000	2.59653	-0.478723	3.07526	-	-	-	-	-	-
Liver-specific A compartments	6	58940000	58960000	2.27542	-0.873482	3.14891	ENSSSCG00000032445;ENSSSCG00000034284	HSF2BP;LAIR1	0.88;1.61	0.25;4.01	2.02406967958213;-1.28571803670105	0.00103064005731331;0.00154450476653215
Liver-specific A compartments	6	58960000	58980000	2.00446	-1.50366	3.50812	ENSSSCG00000037426;ENSSSCG00000041738	Unknown;LILRB1	2.35;0.97	1.13;0.98	1.2384830297577;0.0986384518048908	2.96125352910999e-05;0.816322614679594
Liver-specific A compartments	6	58980000	59000000	1.94626	-2.01193	3.9582	-	-	-	-	-	-
Liver-specific A compartments	6	59000000	59020000	1.64154	-2.57837	4.21991	-	-	-	-	-	-
Liver-specific A compartments	6	59020000	59040000	1.46497	-2.54279	4.00776	-	-	-	-	-	-
Liver-specific A compartments	6	59040000	59060000	1.4825	-2.9198	4.4023	ENSSSCG00000025687;ENSSSCG00000033933	Unknown;KIR3DL2	0.52;0.29	0.31;0.01	0.848508798510003;-	0.0425665343892561;-
Liver-specific A compartments	6	59060000	59080000	1.27424	-2.96612	4.24036	ENSSSCG00000003284	FCAR	0	0	-	-
Liver-specific A compartments	6	59080000	59100000	1.37544	-2.89702	4.27247	ENSSSCG00000022675	NCR1	0.92	0.14	3.10782	0.0011245
Liver-specific A compartments	6	59100000	59120000	1.14316	-2.88297	4.02613	-	-	-	-	-	-
Liver-specific A compartments	6	59120000	59140000	1.3991	-2.78485	4.18395	ENSSSCG00000003286	PYDC2	0.1	0.02	-	-
Liver-specific A compartments	6	59140000	59160000	1.66099	-2.22173	3.88272	-	-	-	-	-	-
Liver-specific A compartments	6	59160000	59180000	1.86093	-1.72263	3.58355	ENSSSCG00000003278	Unknown	12.6	1.52	2.87205	1.23535e-05
Liver-specific A compartments	6	59180000	59200000	1.93954	-1.12962	3.06916	-	-	-	-	-	-
Liver-specific A compartments	6	59200000	59220000	2.24713	-0.782386	3.02952	ENSSSCG00000003277	NLRP2	0.07	0	-	-
Liver-specific A compartments	6	59880000	59900000	2.2531	-0.283299	2.5364	ENSSSCG00000044943	Unknown	0.01	0	-	-
Liver-specific A compartments	6	59920000	59940000	1.66901	-0.872343	2.54135	-	-	-	-	-	-
Liver-specific A compartments	6	59940000	59960000	1.06834	-1.60211	2.67045	ENSSSCG00000003307	NLRP9	0.02	0	-	-
Liver-specific A compartments	6	59960000	59980000	0.722744	-2.38794	3.11069	-	-	-	-	-	-
Liver-specific A compartments	6	60340000	60360000	0.449731	-2.76402	3.21375	ENSSSCG00000003315	NLRP8	0.01	0	-	-
Liver-specific A compartments	6	60360000	60380000	0.732826	-2.06027	2.7931	ENSSSCG00000044019	NLRP5	0.02	0.09	-	-
Liver-specific A compartments	6	60380000	60400000	1.08818	-1.23875	2.32693	-	-	-	-	-	-
Liver-specific A compartments	6	60400000	60420000	1.59804	-0.415703	2.01374	-	-	-	-	-	-
Liver-specific A compartments	6	60500000	60520000	1.47163	-1.10534	2.57697	ENSSSCG00000034600;ENSSSCG00000042915;ENSSSCG00000044317	Unknown;Unknown;Unknown	0.18;0.01;0.03	0;0;0	-;-;-	-;-;-
Liver-specific A compartments	6	60520000	60540000	1.28163	-0.868799	2.15043	ENSSSCG00000037756;ENSSSCG00000042659	Unknown;Unknown	0.18;0	0;0	-;-	-;-
Liver-specific A compartments	6	60540000	60560000	1.09219	-0.530023	1.62221	ENSSSCG00000049238	EDDM13	0	0	-	-
Liver-specific A compartments	6	60800000	60820000	1.08256	-0.525377	1.60794	-	-	-	-	-	-
Liver-specific A compartments	6	86600000	86620000	0.672013	-0.135959	0.807972	-	-	-	-	-	-
Liver-specific A compartments	6	90980000	91000000	0.761495	-1.09984	1.86133	-	-	-	-	-	-
Liver-specific A compartments	6	91000000	91020000	1.04339	-0.8332	1.87659	ENSSSCG00000003585;ENSSSCG00000035068	GJB5;GJB4	0.3;0.1	0;0	-;-	-;-
Liver-specific A compartments	6	93320000	93340000	0.454965	-0.969503	1.42447	-	-	-	-	-	-
Liver-specific A compartments	6	106380000	106400000	0.454691	-0.617172	1.07186	-	-	-	-	-	-
Liver-specific A compartments	6	106400000	106420000	0.474645	-0.851141	1.32579	ENSSSCG00000003699	GREB1L	4.77	5.7	-0.254553	0.292948
Liver-specific A compartments	6	106420000	106440000	0.440018	-0.993553	1.43357	-	-	-	-	-	-
Liver-specific A compartments	6	106440000	106460000	0.424732	-1.30189	1.72662	-	-	-	-	-	-
Liver-specific A compartments	6	107060000	107080000	1.29949	-0.553203	1.85269	-	-	-	-	-	-
Liver-specific A compartments	6	107080000	107100000	1.2974	-0.880339	2.17774	-	-	-	-	-	-
Liver-specific A compartments	6	107100000	107120000	1.12688	-1.14181	2.26869	-	-	-	-	-	-
Liver-specific A compartments	6	107120000	107140000	1.23412	-1.36085	2.59497	-	-	-	-	-	-
Liver-specific A compartments	6	107140000	107160000	1.10422	-1.602	2.70622	-	-	-	-	-	-
Liver-specific A compartments	6	107160000	107180000	1.19254	-1.86635	3.05889	-	-	-	-	-	-
Liver-specific A compartments	6	107180000	107200000	1.1921	-1.97429	3.16639	-	-	-	-	-	-
Liver-specific A compartments	6	107200000	107220000	1.20271	-2.05106	3.25378	-	-	-	-	-	-
Liver-specific A compartments	6	107220000	107240000	1.2013	-1.96665	3.16795	-	-	-	-	-	-
Liver-specific A compartments	6	107240000	107260000	1.10294	-1.97748	3.08043	-	-	-	-	-	-
Liver-specific A compartments	6	107260000	107280000	1.22002	-1.80449	3.02451	-	-	-	-	-	-
Liver-specific A compartments	6	107280000	107300000	1.47773	-1.46967	2.9474	ENSSSCG00000003702	GATA6	22.32	3.29	2.7932	9.8073e-35
Liver-specific A compartments	6	107300000	107320000	1.26201	-1.9113	3.17331	-	-	-	-	-	-
Liver-specific A compartments	6	107320000	107340000	1.09544	-2.3055	3.40094	-	-	-	-	-	-
Liver-specific A compartments	6	107340000	107360000	1.08478	-2.44043	3.52522	-	-	-	-	-	-
Liver-specific A compartments	6	107360000	107380000	1.25288	-2.34776	3.60065	-	-	-	-	-	-
Liver-specific A compartments	6	107380000	107400000	1.10863	-2.36314	3.47178	-	-	-	-	-	-
Liver-specific A compartments	6	107400000	107420000	1.22974	-2.51116	3.7409	-	-	-	-	-	-
Liver-specific A compartments	6	107420000	107440000	1.1814	-2.36656	3.54796	-	-	-	-	-	-
Liver-specific A compartments	6	107440000	107460000	1.06564	-2.29011	3.35575	-	-	-	-	-	-
Liver-specific A compartments	6	107460000	107480000	0.89851	-2.27833	3.17684	ENSSSCG00000003703	AC105052.3	0.13	0	-	-
Liver-specific A compartments	6	107480000	107500000	0.912368	-2.59549	3.50785	-	-	-	-	-	-
Liver-specific A compartments	6	107500000	107520000	0.906062	-2.64863	3.5547	-	-	-	-	-	-
Liver-specific A compartments	6	107520000	107540000	0.937652	-2.81992	3.75757	-	-	-	-	-	-
Liver-specific A compartments	6	107540000	107560000	0.788133	-2.81519	3.60332	-	-	-	-	-	-
Liver-specific A compartments	6	107560000	107580000	0.931024	-2.73422	3.66524	ENSSSCG00000047594	Unknown	1.33	3.02	-1.04254	0.000322462
Liver-specific A compartments	6	107580000	107600000	0.72724	-2.69737	3.42461	-	-	-	-	-	-
Liver-specific A compartments	6	107600000	107620000	0.671476	-2.77764	3.44911	-	-	-	-	-	-
Liver-specific A compartments	6	107620000	107640000	0.70482	-2.65951	3.36433	-	-	-	-	-	-
Liver-specific A compartments	6	107640000	107660000	0.7128	-2.56661	3.27941	ENSSSCG00000031330	Unknown	0.8	0.3	2.0318	0.570016
Liver-specific A compartments	6	107660000	107680000	0.547796	-2.80784	3.35563	-	-	-	-	-	-
Liver-specific A compartments	6	107680000	107700000	0.728374	-2.78219	3.51057	-	-	-	-	-	-
Liver-specific A compartments	6	107700000	107720000	0.801767	-2.81959	3.62135	-	-	-	-	-	-
Liver-specific A compartments	6	107720000	107740000	0.954762	-2.6999	3.65466	-	-	-	-	-	-
Liver-specific A compartments	6	107740000	107760000	1.13158	-2.35412	3.4857	-	-	-	-	-	-
Liver-specific A compartments	6	107760000	107780000	0.92179	-2.39252	3.31431	-	-	-	-	-	-
Liver-specific A compartments	6	107780000	107800000	0.966074	-2.5471	3.51317	-	-	-	-	-	-
Liver-specific A compartments	6	107800000	107820000	1.15776	-2.63026	3.78802	-	-	-	-	-	-
Liver-specific A compartments	6	107820000	107840000	1.11277	-2.63461	3.74738	-	-	-	-	-	-
Liver-specific A compartments	6	107840000	107860000	1.00897	-2.72407	3.73305	ENSSSCG00000003704	Unknown	0.73	0	1.44603	0.704802
Liver-specific A compartments	6	107860000	107880000	1.1676	-2.82857	3.99617	-	-	-	-	-	-
Liver-specific A compartments	6	107880000	107900000	1.4494	-2.73877	4.18817	-	-	-	-	-	-
Liver-specific A compartments	6	107900000	107920000	1.82926	-2.41619	4.24545	-	-	-	-	-	-
Liver-specific A compartments	6	107920000	107940000	2.06808	-1.78517	3.85325	ENSSSCG00000024419	RBBP8	48.89	15.7	1.79605	3.57853e-19
Liver-specific A compartments	6	107940000	107960000	2.00517	-1.31338	3.31856	-	-	-	-	-	-
Liver-specific A compartments	6	107960000	107980000	1.9583	-1.41149	3.36978	-	-	-	-	-	-
Liver-specific A compartments	6	107980000	108000000	1.84277	-1.29463	3.1374	-	-	-	-	-	-
Liver-specific A compartments	6	108000000	108020000	1.88428	-1.28787	3.17215	-	-	-	-	-	-
Liver-specific A compartments	6	108020000	108040000	1.96283	-1.3086	3.27143	-	-	-	-	-	-
Liver-specific A compartments	6	108040000	108060000	1.95283	-1.49694	3.44977	-	-	-	-	-	-
Liver-specific A compartments	6	108060000	108080000	2.16562	-1.42033	3.58595	-	-	-	-	-	-
Liver-specific A compartments	6	108080000	108100000	2.13504	-1.20822	3.34327	-	-	-	-	-	-
Liver-specific A compartments	6	108100000	108120000	2.08941	-0.898105	2.98751	ENSSSCG00000003705	CABLES1	9.01	4.26	1.18985	2.2383e-05
Liver-specific A compartments	6	108120000	108140000	2.12903	-0.653024	2.78206	-	-	-	-	-	-
Liver-specific A compartments	6	108140000	108160000	2.12755	-0.766461	2.89401	-	-	-	-	-	-
Liver-specific A compartments	6	108160000	108180000	2.16566	-0.806756	2.97241	-	-	-	-	-	-
Liver-specific A compartments	6	108180000	108200000	2.22307	-0.569544	2.79261	-	-	-	-	-	-
Liver-specific A compartments	6	108200000	108220000	2.17616	-0.573275	2.74943	-	-	-	-	-	-
Liver-specific A compartments	6	108220000	108240000	2.23073	-0.646892	2.87762	-	-	-	-	-	-
Liver-specific A compartments	6	108240000	108260000	2.20377	-0.7238	2.92757	-	-	-	-	-	-
Liver-specific A compartments	6	108260000	108280000	2.23633	-0.658621	2.89495	-	-	-	-	-	-
Liver-specific A compartments	6	108280000	108300000	2.36295	-0.392621	2.75557	-	-	-	-	-	-
Liver-specific A compartments	6	108480000	108500000	1.90922	-0.448697	2.35792	-	-	-	-	-	-
Liver-specific A compartments	6	108500000	108520000	1.90284	-0.391336	2.29417	ENSSSCG00000003708	ANKRD29	67.6	22.58	1.71279	6.4632e-07
Liver-specific A compartments	6	108520000	108540000	1.73777	-0.832784	2.57055	-	-	-	-	-	-
Liver-specific A compartments	6	108540000	108560000	1.57214	-1.1943	2.76644	ENSSSCG00000003709	LAMA3	8.15	6.55	0.417721	0.204358
Liver-specific A compartments	6	108560000	108580000	1.41211	-1.40425	2.81637	-	-	-	-	-	-
Liver-specific A compartments	6	108580000	108600000	1.34385	-1.30581	2.64966	-	-	-	-	-	-
Liver-specific A compartments	6	108600000	108620000	1.34588	-1.38624	2.73212	-	-	-	-	-	-
Liver-specific A compartments	6	108620000	108640000	1.52315	-1.29726	2.82041	ENSSSCG00000040911	Unknown	0.14	0.14	-	-
Liver-specific A compartments	6	108640000	108660000	1.37745	-0.865804	2.24325	-	-	-	-	-	-
Liver-specific A compartments	6	108660000	108680000	1.46326	-0.932616	2.39588	-	-	-	-	-	-
Liver-specific A compartments	6	108680000	108700000	1.36284	-1.06463	2.42747	-	-	-	-	-	-
Liver-specific A compartments	6	108700000	108720000	1.59457	-1.06578	2.66035	-	-	-	-	-	-
Liver-specific A compartments	6	108720000	108740000	1.51246	-1.18887	2.70132	-	-	-	-	-	-
Liver-specific A compartments	6	108740000	108760000	1.34979	-1.35866	2.70845	-	-	-	-	-	-
Liver-specific A compartments	6	108760000	108780000	1.42311	-1.2423	2.66541	-	-	-	-	-	-
Liver-specific A compartments	6	108780000	108800000	1.5557	-1.0956	2.6513	-	-	-	-	-	-
Liver-specific A compartments	6	108800000	108820000	1.74102	-0.912872	2.6539	-	-	-	-	-	-
Liver-specific A compartments	6	108820000	108840000	1.91137	-0.819048	2.73042	-	-	-	-	-	-
Liver-specific A compartments	6	108840000	108860000	1.91452	-0.364935	2.27946	-	-	-	-	-	-
Liver-specific A compartments	6	108860000	108880000	2.17254	-0.280522	2.45306	ENSSSCG00000003710	TTC39C	98.31	7.19	3.85792	6.7818e-46
Liver-specific A compartments	6	108880000	108900000	2.1453	-0.611301	2.7566	-	-	-	-	-	-
Liver-specific A compartments	6	108900000	108920000	1.97559	-0.580286	2.55588	ENSSSCG00000003711	CABYR	14.72	1.69	3.21993	1.11013e-25
Liver-specific A compartments	6	108920000	108940000	1.75664	-0.564238	2.32088	-	-	-	-	-	-
Liver-specific A compartments	6	108940000	108960000	1.84792	-0.346569	2.19449	-	-	-	-	-	-
Liver-specific A compartments	6	109140000	109160000	0.435092	-0.380757	0.815848	-	-	-	-	-	-
Liver-specific A compartments	6	164220000	164240000	1.58379	-0.786898	2.37069	-	-	-	-	-	-
Liver-specific A compartments	6	164240000	164260000	1.39512	-1.36466	2.75978	-	-	-	-	-	-
Liver-specific A compartments	6	164260000	164280000	1.42197	-1.22451	2.64648	-	-	-	-	-	-
Liver-specific A compartments	6	164280000	164300000	1.78734	-1.19436	2.98169	ENSSSCG00000035847	TAL1	10.1	5	1.17297	0.000388507
Liver-specific A compartments	6	164300000	164320000	1.57726	-2.16941	3.74667	ENSSSCG00000020872	PDZK1IP1	60.1	1.76	3.86695	3.48239e-14
Liver-specific A compartments	6	164320000	164340000	1.00231	-2.92765	3.92996	-	-	-	-	-	-
Liver-specific A compartments	6	164700000	164720000	1.67594	-2.99918	4.67512	-	-	-	-	-	-
Liver-specific A compartments	6	164720000	164740000	2.25517	-1.28642	3.54159	ENSSSCG00000003894	CYP4B1	1.25	3.22	-0.913716	0.366999
Liver-specific A compartments	6	168080000	168100000	4.74248	-1.6002	6.34268	-	-	-	-	-	-
Liver-specific A compartments	6	168100000	168120000	4.7614	-2.31945	7.08085	ENSSSCG00000003955	Unknown	0.03	0	-	-
Liver-specific A compartments	6	168120000	168140000	4.01639	-3.13981	7.1562	ENSSSCG00000003957;ENSSSCG00000003958	Unknown;Unknown	0.01;0	0;0	-;-	-;-
Liver-specific A compartments	6	168140000	168160000	3.543	-3.39892	6.94192	ENSSSCG00000003959	Unknown	0.03	0	-	-
Liver-specific A compartments	6	168160000	168180000	3.29904	-3.18387	6.48291	-	-	-	-	-	-
Liver-specific A compartments	6	168180000	168200000	3.00672	-3.65559	6.66231	-	-	-	-	-	-
Liver-specific A compartments	6	168200000	168220000	2.93976	-3.58962	6.52938	-	-	-	-	-	-
Liver-specific A compartments	6	168220000	168240000	2.80339	-3.57094	6.37433	-	-	-	-	-	-
Liver-specific A compartments	6	168260000	168280000	3.00467	-3.10844	6.11311	-	-	-	-	-	-
Liver-specific A compartments	6	168280000	168300000	2.69054	-3.66865	6.3592	ENSSSCG00000039458	Unknown	0.01	0.26	-	-
Liver-specific A compartments	6	168300000	168320000	2.76302	-4.11441	6.87743	-	-	-	-	-	-
Liver-specific A compartments	6	168320000	168340000	2.96996	-3.74038	6.71034	-	-	-	-	-	-
Liver-specific A compartments	6	168340000	168360000	3.32982	-3.06253	6.39234	-	-	-	-	-	-
Liver-specific A compartments	6	168360000	168380000	3.35025	-3.30755	6.6578	-	-	-	-	-	-
Liver-specific A compartments	6	168380000	168400000	3.39285	-2.53711	5.92996	-	-	-	-	-	-
Liver-specific A compartments	6	168400000	168420000	3.76043	-2.55192	6.31234	-	-	-	-	-	-
Liver-specific A compartments	6	168420000	168440000	4.14235	-1.30328	5.44563	-	-	-	-	-	-
Liver-specific A compartments	7	5400000	5420000	0.567851	-1.48998	2.05783	-	-	-	-	-	-
Liver-specific A compartments	7	7300000	7320000	0.859265	-1.96654	2.8258	-	-	-	-	-	-
Liver-specific A compartments	7	7320000	7340000	1.18243	-1.84845	3.03088	ENSSSCG00000033009	GCNT2	24.69	5.49	2.32638	2.10283e-19
Liver-specific A compartments	7	7340000	7360000	1.23842	-1.81309	3.05152	-	-	-	-	-	-
Liver-specific A compartments	7	7360000	7380000	1.0211	-1.66689	2.68798	-	-	-	-	-	-
Liver-specific A compartments	7	7380000	7400000	1.10341	-1.46691	2.57032	-	-	-	-	-	-
Liver-specific A compartments	7	7400000	7420000	1.02952	-1.59525	2.62477	-	-	-	-	-	-
Liver-specific A compartments	7	7420000	7440000	1.00744	-1.11063	2.11806	ENSSSCG00000001040	C6ORF52	48.67	0	10.1385	9.16467e-16
Liver-specific A compartments	7	7440000	7460000	1.54704	-0.540091	2.08713	ENSSSCG00000001041	PAK1IP1	111.14	89.08	0.531616	0.0024175
Liver-specific A compartments	7	7460000	7480000	1.59494	-0.742699	2.33764	ENSSSCG00000001038	TMEM14C	764.25	200.15	1.87529	4.00026e-15
Liver-specific A compartments	7	7480000	7500000	1.38077	-1.19074	2.57151	-	-	-	-	-	-
Liver-specific A compartments	7	7500000	7520000	1.19263	-1.72149	2.91413	ENSSSCG00000051558	SYCP2L	0.04	0.23	-	-
Liver-specific A compartments	7	7520000	7540000	1.21207	-1.85247	3.06454	ENSSSCG00000001042	MAK	3.01	0.34	3.2526	2.54027e-11
Liver-specific A compartments	7	7540000	7560000	1.0819	-2.2187	3.3006	-	-	-	-	-	-
Liver-specific A compartments	7	7560000	7580000	0.998015	-2.51665	3.51466	ENSSSCG00000035562	GCM2	0	0	-	-
Liver-specific A compartments	7	7580000	7600000	1.09429	-2.64251	3.73681	-	-	-	-	-	-
Liver-specific A compartments	7	7600000	7620000	1.08775	-2.94217	4.02992	-	-	-	-	-	-
Liver-specific A compartments	7	7620000	7640000	1.16918	-2.57329	3.74247	-	-	-	-	-	-
Liver-specific A compartments	7	7640000	7660000	1.36723	-2.76074	4.12797	-	-	-	-	-	-
Liver-specific A compartments	7	7660000	7680000	1.38105	-2.77286	4.1539	-	-	-	-	-	-
Liver-specific A compartments	7	7680000	7700000	1.57858	-2.72236	4.30094	-	-	-	-	-	-
Liver-specific A compartments	7	7700000	7720000	1.70298	-2.2877	3.99069	-	-	-	-	-	-
Liver-specific A compartments	7	7720000	7740000	1.82286	-1.99705	3.81992	-	-	-	-	-	-
Liver-specific A compartments	7	7740000	7760000	1.70012	-1.27882	2.97895	-	-	-	-	-	-
Liver-specific A compartments	7	8180000	8200000	1.85107	-0.273805	2.12488	-	-	-	-	-	-
Liver-specific A compartments	7	8260000	8280000	1.68001	-0.161086	1.8411	-	-	-	-	-	-
Liver-specific A compartments	7	8300000	8320000	1.69941	-0.306999	2.00641	ENSSSCG00000001048;ENSSSCG00000041448	ADTRP;Unknown	190.52;2.59	0.27;0.65	9.57950723395193;2.07364179831408	2.18060281119931e-109;1.73061015037252e-08
Liver-specific A compartments	7	8320000	8340000	1.58421	-0.287956	1.87217	-	-	-	-	-	-
Liver-specific A compartments	7	8340000	8360000	1.68869	-0.419617	2.10831	-	-	-	-	-	-
Liver-specific A compartments	7	8600000	8620000	1.75955	-0.224289	1.98384	-	-	-	-	-	-
Liver-specific A compartments	7	8620000	8640000	1.7353	-0.430036	2.16534	-	-	-	-	-	-
Liver-specific A compartments	7	8640000	8660000	1.65436	-0.604536	2.2589	-	-	-	-	-	-
Liver-specific A compartments	7	8660000	8680000	1.60684	-0.834683	2.44153	-	-	-	-	-	-
Liver-specific A compartments	7	8680000	8700000	1.54953	-0.940046	2.48957	-	-	-	-	-	-
Liver-specific A compartments	7	8700000	8720000	1.49695	-1.02393	2.52088	-	-	-	-	-	-
Liver-specific A compartments	7	8720000	8740000	1.4302	-1.45201	2.88221	-	-	-	-	-	-
Liver-specific A compartments	7	8740000	8760000	1.44633	-1.73673	3.18306	ENSSSCG00000035598	EDN1	1.47	2.13	-0.323357	0.492842
Liver-specific A compartments	7	8760000	8780000	1.43191	-1.92779	3.3597	-	-	-	-	-	-
Liver-specific A compartments	7	8780000	8800000	1.48758	-2.27401	3.76159	-	-	-	-	-	-
Liver-specific A compartments	7	8800000	8820000	1.45657	-2.27404	3.7306	-	-	-	-	-	-
Liver-specific A compartments	7	8820000	8840000	1.36656	-2.6124	3.97895	-	-	-	-	-	-
Liver-specific A compartments	7	8840000	8860000	1.2692	-2.39026	3.65946	-	-	-	-	-	-
Liver-specific A compartments	7	8860000	8880000	1.22508	-2.70457	3.92965	-	-	-	-	-	-
Liver-specific A compartments	7	8880000	8900000	1.18783	-2.69638	3.88421	-	-	-	-	-	-
Liver-specific A compartments	7	8900000	8920000	1.22452	-2.64777	3.87229	-	-	-	-	-	-
Liver-specific A compartments	7	8920000	8940000	1.2597	-2.58205	3.84175	-	-	-	-	-	-
Liver-specific A compartments	7	8940000	8960000	1.39401	-2.7053	4.0993	-	-	-	-	-	-
Liver-specific A compartments	7	8960000	8980000	1.34279	-2.4031	3.74589	-	-	-	-	-	-
Liver-specific A compartments	7	8980000	9000000	1.12885	-2.27254	3.40139	-	-	-	-	-	-
Liver-specific A compartments	7	9000000	9020000	1.14326	-2.32193	3.4652	-	-	-	-	-	-
Liver-specific A compartments	7	9020000	9040000	0.898425	-2.70337	3.60179	-	-	-	-	-	-
Liver-specific A compartments	7	9040000	9060000	0.653982	-3.05646	3.71044	-	-	-	-	-	-
Liver-specific A compartments	7	9260000	9280000	0.689497	-2.53437	3.22387	-	-	-	-	-	-
Liver-specific A compartments	7	9280000	9300000	0.741792	-1.81737	2.55916	-	-	-	-	-	-
Liver-specific A compartments	7	9300000	9320000	0.771716	-1.65385	2.42557	-	-	-	-	-	-
Liver-specific A compartments	7	9320000	9340000	0.887672	-1.69909	2.58676	-	-	-	-	-	-
Liver-specific A compartments	7	9340000	9360000	0.787863	-1.64142	2.42929	-	-	-	-	-	-
Liver-specific A compartments	7	9360000	9380000	0.714122	-1.71192	2.42604	-	-	-	-	-	-
Liver-specific A compartments	7	9400000	9420000	0.69646	-1.49616	2.19262	-	-	-	-	-	-
Liver-specific A compartments	7	9420000	9440000	0.815211	-1.50359	2.3188	-	-	-	-	-	-
Liver-specific A compartments	7	9440000	9460000	0.75411	-1.86139	2.6155	-	-	-	-	-	-
Liver-specific A compartments	7	9460000	9480000	0.798623	-1.91711	2.71573	-	-	-	-	-	-
Liver-specific A compartments	7	9480000	9500000	0.885764	-2.14013	3.02589	-	-	-	-	-	-
Liver-specific A compartments	7	9500000	9520000	0.809148	-2.01092	2.82007	-	-	-	-	-	-
Liver-specific A compartments	7	9520000	9540000	0.785388	-1.83411	2.61949	-	-	-	-	-	-
Liver-specific A compartments	7	9540000	9560000	0.911463	-1.71478	2.62624	-	-	-	-	-	-
Liver-specific A compartments	7	9560000	9580000	0.913132	-1.54543	2.45856	-	-	-	-	-	-
Liver-specific A compartments	7	9580000	9600000	1.02318	-1.32779	2.35097	-	-	-	-	-	-
Liver-specific A compartments	7	9600000	9620000	1.09155	-1.20551	2.29706	ENSSSCG00000046784	Unknown	0.04	0	-	-
Liver-specific A compartments	7	9620000	9640000	1.29072	-1.02562	2.31634	-	-	-	-	-	-
Liver-specific A compartments	7	9640000	9660000	1.43582	-0.602818	2.03864	-	-	-	-	-	-
Liver-specific A compartments	7	19420000	19440000	0.75339	-1.34581	2.0992	-	-	-	-	-	-
Liver-specific A compartments	7	19440000	19460000	0.839667	-1.22694	2.06661	-	-	-	-	-	-
Liver-specific A compartments	7	19460000	19480000	0.843442	-0.998774	1.84222	-	-	-	-	-	-
Liver-specific A compartments	7	19560000	19580000	0.819659	-0.723363	1.54302	-	-	-	-	-	-
Liver-specific A compartments	7	19580000	19600000	0.891916	-0.640517	1.53243	ENSSSCG00000001095	GMNN	111.97	22.22	2.38724	1.63413e-14
Liver-specific A compartments	7	20640000	20660000	0.713897	-4.58231	5.29621	-	-	-	-	-	-
Liver-specific A compartments	7	20660000	20680000	0.930472	-3.92463	4.8551	ENSSSCG00000036191;ENSSSCG00000037547;ENSSSCG00000044403	SLC17A2;SLC17A3;Unknown	32.76;32.98;0.81	0;0.35;1.33	13.7155550850089;6.6560631738837;-0.670203609625731	4.40416703478155e-33;2.02015822612413e-52;0.0139895658061307
Liver-specific A compartments	7	20680000	20700000	1.099	-2.63378	3.73278	ENSSSCG00000035153	TRIM38	52.82	12.77	2.20204	1.16356e-07
Liver-specific A compartments	7	20700000	20720000	1.46911	-1.23152	2.70063	ENSSSCG00000047079	H3-4	1907.71	165.77	3.45286	1.47739e-05
Liver-specific A compartments	7	34240000	34260000	1.42192	-0.463706	1.88562	-	-	-	-	-	-
Liver-specific A compartments	7	34260000	34280000	1.28286	-0.615448	1.89831	-	-	-	-	-	-
Liver-specific A compartments	7	34280000	34300000	1.24238	-0.848455	2.09084	-	-	-	-	-	-
Liver-specific A compartments	7	34300000	34320000	1.12295	-0.881992	2.00494	-	-	-	-	-	-
Liver-specific A compartments	7	34320000	34340000	1.09791	-1.05264	2.15056	-	-	-	-	-	-
Liver-specific A compartments	7	34340000	34360000	0.940348	-0.911532	1.85188	-	-	-	-	-	-
Liver-specific A compartments	7	34360000	34380000	0.999604	-1.08742	2.08703	ENSSSCG00000043280	DNAH8	0.65	1.04	-0.455419	0.193839
Liver-specific A compartments	7	34380000	34400000	0.88035	-1.04423	1.92458	-	-	-	-	-	-
Liver-specific A compartments	7	34400000	34420000	0.898422	-1.15121	2.04964	-	-	-	-	-	-
Liver-specific A compartments	7	34420000	34440000	0.892048	-1.10575	1.9978	-	-	-	-	-	-
Liver-specific A compartments	7	34440000	34460000	1.06293	-0.983315	2.04624	-	-	-	-	-	-
Liver-specific A compartments	7	34460000	34480000	1.01652	-0.815422	1.83195	-	-	-	-	-	-
Liver-specific A compartments	7	34500000	34520000	1.36656	-0.502106	1.86866	-	-	-	-	-	-
Liver-specific A compartments	7	34600000	34620000	1.55729	-0.434364	1.99165	-	-	-	-	-	-
Liver-specific A compartments	7	34620000	34640000	1.86435	-0.477581	2.34193	-	-	-	-	-	-
Liver-specific A compartments	7	34640000	34660000	2.11801	-0.331591	2.4496	ENSSSCG00000025423	KCNK5	13.03	0.45	4.7712	3.86898e-59
Liver-specific A compartments	7	34660000	34680000	1.68908	-0.331675	2.02075	-	-	-	-	-	-
Liver-specific A compartments	7	34680000	34700000	1.58329	-0.290888	1.87418	-	-	-	-	-	-
Liver-specific A compartments	7	34700000	34720000	1.32051	-0.404853	1.72536	-	-	-	-	-	-
Liver-specific A compartments	7	34720000	34740000	1.1454	-0.576318	1.72172	ENSSSCG00000001592;ENSSSCG00000037484	KCNK17;KCNK16	0.17;0.1	0;0.08	-;-	-;-
Liver-specific A compartments	7	34740000	34760000	1.01709	-0.68485	1.70194	-	-	-	-	-	-
Liver-specific A compartments	7	34760000	34780000	0.926635	-0.698852	1.62549	-	-	-	-	-	-
Liver-specific A compartments	7	34780000	34800000	0.766136	-0.627146	1.39328	-	-	-	-	-	-
Liver-specific A compartments	7	35080000	35100000	0.844689	-1.07141	1.9161	ENSSSCG00000001594;ENSSSCG00000031184	KIF6;Unknown	0.85;1.89	0.03;1.72	6.44510369593721;0.34315634789123	0.0800891351815721;0.297055150332843
Liver-specific A compartments	7	35100000	35120000	0.78193	-0.868301	1.65023	-	-	-	-	-	-
Liver-specific A compartments	7	35120000	35140000	0.684395	-0.777139	1.46153	-	-	-	-	-	-
Liver-specific A compartments	7	35140000	35160000	0.696437	-0.700239	1.39668	ENSSSCG00000001595	DAAM2	3.96	20.7	-2.3257	1.77656e-17
Liver-specific A compartments	7	35340000	35360000	0.792311	-0.447148	1.23946	-	-	-	-	-	-
Liver-specific A compartments	7	35520000	35540000	0.564346	-1.15835	1.7227	-	-	-	-	-	-
Liver-specific A compartments	7	35600000	35620000	0.6387	-0.554159	1.19286	-	-	-	-	-	-
Liver-specific A compartments	7	35620000	35640000	0.671296	-0.336066	1.00736	-	-	-	-	-	-
Liver-specific A compartments	7	41980000	42000000	0.510855	-1.84286	2.35372	-	-	-	-	-	-
Liver-specific A compartments	7	42000000	42020000	0.608929	-1.65615	2.26508	-	-	-	-	-	-
Liver-specific A compartments	7	42020000	42040000	0.772055	-1.23134	2.00339	-	-	-	-	-	-
Liver-specific A compartments	7	42040000	42060000	0.760324	-1.35526	2.11558	-	-	-	-	-	-
Liver-specific A compartments	7	46280000	46300000	0.490705	-0.640612	1.13132	-	-	-	-	-	-
Liver-specific A compartments	7	46300000	46320000	0.583177	-0.445136	1.02831	-	-	-	-	-	-
Liver-specific A compartments	7	46420000	46440000	1.08555	-0.168924	1.25447	-	-	-	-	-	-
Liver-specific A compartments	7	46440000	46460000	0.882081	-0.372349	1.25443	-	-	-	-	-	-
Liver-specific A compartments	7	46480000	46500000	0.731442	-0.523128	1.25457	-	-	-	-	-	-
Liver-specific A compartments	7	46520000	46540000	0.731209	-0.996528	1.72774	-	-	-	-	-	-
Liver-specific A compartments	7	46540000	46560000	0.875394	-1.46112	2.33651	-	-	-	-	-	-
Liver-specific A compartments	7	46560000	46580000	0.847656	-1.46096	2.30861	ENSSSCG00000002623	GSTA1	2842.9	1.63	10.6119	3.4319e-70
Liver-specific A compartments	7	46580000	46600000	0.812931	-1.67994	2.49287	-	-	-	-	-	-
Liver-specific A compartments	7	46600000	46620000	0.707287	-1.3662	2.07349	-	-	-	-	-	-
Liver-specific A compartments	7	46620000	46640000	0.738384	-1.09487	1.83326	ENSSSCG00000023467	Unknown	20.07	0.05	8.66993	6.14532e-13
Liver-specific A compartments	7	46720000	46740000	1.25155	-0.286164	1.53771	ENSSSCG00000002628;ENSSSCG00000002629	CILK1;FBXO9	8.58;147.2	14.11;122.19	-0.624827886547104;0.3427394469443	0.000922735013572611;0.0416982900440981
Liver-specific A compartments	7	46740000	46760000	0.915084	-1.02064	1.93573	-	-	-	-	-	-
Liver-specific A compartments	7	46760000	46780000	0.961727	-1.60546	2.56719	-	-	-	-	-	-
Liver-specific A compartments	7	46780000	46800000	0.851366	-1.84612	2.69748	-	-	-	-	-	-
Liver-specific A compartments	7	46800000	46820000	1.15466	-1.66446	2.81912	ENSSSCG00000032538	GCM1	6.75	0.78	2.98328	6.76984e-22
Liver-specific A compartments	7	46820000	46840000	1.34973	-1.40179	2.75152	-	-	-	-	-	-
Liver-specific A compartments	7	46840000	46860000	1.4208	-1.30142	2.72222	-	-	-	-	-	-
Liver-specific A compartments	7	46860000	46880000	1.36846	-1.24828	2.61673	-	-	-	-	-	-
Liver-specific A compartments	7	46880000	46900000	1.33315	-1.17843	2.51158	-	-	-	-	-	-
Liver-specific A compartments	7	46900000	46920000	1.29251	-1.09875	2.39126	-	-	-	-	-	-
Liver-specific A compartments	7	46920000	46940000	1.32345	-0.899838	2.22329	-	-	-	-	-	-
Liver-specific A compartments	7	46940000	46960000	1.16239	-1.28162	2.444	-	-	-	-	-	-
Liver-specific A compartments	7	46960000	46980000	0.670259	-2.25025	2.92051	-	-	-	-	-	-
Liver-specific A compartments	7	46980000	47000000	0.454986	-2.6129	3.06789	-	-	-	-	-	-
Liver-specific A compartments	7	48240000	48260000	1.17506	-0.672982	1.84804	ENSSSCG00000001771	RASGRF1	0.11	0.08	-	-
Liver-specific A compartments	7	48260000	48280000	0.880142	-0.565376	1.44552	-	-	-	-	-	-
Liver-specific A compartments	7	48280000	48300000	0.983772	-0.603418	1.58719	-	-	-	-	-	-
Liver-specific A compartments	7	48300000	48320000	1.0601	-0.47189	1.53199	-	-	-	-	-	-
Liver-specific A compartments	7	48340000	48360000	0.778158	-0.848447	1.62661	-	-	-	-	-	-
Liver-specific A compartments	7	48360000	48380000	0.65385	-1.22661	1.88046	-	-	-	-	-	-
Liver-specific A compartments	7	48380000	48400000	0.706753	-1.1319	1.83865	-	-	-	-	-	-
Liver-specific A compartments	7	48400000	48420000	0.749755	-1.25489	2.00464	ENSSSCG00000032430	ANKRD34C	0.09	0.18	-	-
Liver-specific A compartments	7	48420000	48440000	1.10796	-0.826785	1.93475	ENSSSCG00000001773	TMED3	382.54	43.47	3.18345	2.93573e-14
Liver-specific A compartments	7	48440000	48460000	0.805321	-1.08248	1.8878	-	-	-	-	-	-
Liver-specific A compartments	7	48460000	48480000	0.546968	-1.27894	1.8259	-	-	-	-	-	-
Liver-specific A compartments	7	48740000	48760000	0.592129	-1.68953	2.28166	-	-	-	-	-	-
Liver-specific A compartments	7	48760000	48780000	1.03353	-1.1825	2.21603	-	-	-	-	-	-
Liver-specific A compartments	7	48780000	48800000	1.29138	-0.900132	2.19151	-	-	-	-	-	-
Liver-specific A compartments	7	48800000	48820000	1.54163	-0.53232	2.07395	-	-	-	-	-	-
Liver-specific A compartments	7	49100000	49120000	1.35271	-0.321111	1.67382	-	-	-	-	-	-
Liver-specific A compartments	7	49120000	49140000	1.13437	-0.691807	1.82618	-	-	-	-	-	-
Liver-specific A compartments	7	49140000	49160000	1.10947	-0.629986	1.73946	-	-	-	-	-	-
Liver-specific A compartments	7	49160000	49180000	0.62383	-0.840111	1.46394	-	-	-	-	-	-
Liver-specific A compartments	7	64620000	64640000	0.447108	-0.280454	0.727562	-	-	-	-	-	-
Liver-specific A compartments	7	74760000	74780000	0.422188	-2.88775	3.30994	ENSSSCG00000001979;ENSSSCG00000037475	Unknown;CTSG	59.23;14.27	0.73;0.05	6.93356148412769;10.5946690300783	1.07465443658799e-48;1.07067171688437e-09
Liver-specific A compartments	7	74780000	74800000	0.812258	-2.46904	3.28129	ENSSSCG00000028443	Unknown	0.75	0.76	-0.272802	0.878769
Liver-specific A compartments	7	74800000	74820000	1.20016	-2.04568	3.24583	ENSSSCG00000036577	Unknown	0.13	0	-	-
Liver-specific A compartments	7	74820000	74840000	1.86472	-0.799297	2.66402	ENSSSCG00000001982	Unknown	1.7	1.46	0.21193	0.756105
Liver-specific A compartments	7	77640000	77660000	0.705001	-0.82797	1.53297	-	-	-	-	-	-
Liver-specific A compartments	7	77820000	77840000	0.476269	-1.08039	1.55666	-	-	-	-	-	-
Liver-specific A compartments	7	77880000	77900000	0.739283	-0.658957	1.39824	-	-	-	-	-	-
Liver-specific A compartments	7	78260000	78280000	0.663164	-0.762352	1.42552	ENSSSCG00000031538	RNASE4	2462.62	163.78	3.85457	1.22574e-23
Liver-specific A compartments	7	89200000	89220000	2.22265	-0.50648	2.72913	ENSSSCG00000002283	FUT8	81.63	24.26	1.84494	5.75176e-15
Liver-specific A compartments	7	89220000	89240000	1.82563	-1.25364	3.07927	-	-	-	-	-	-
Liver-specific A compartments	7	89240000	89260000	1.79473	-1.58802	3.38274	-	-	-	-	-	-
Liver-specific A compartments	7	89260000	89280000	1.7714	-1.70481	3.47622	-	-	-	-	-	-
Liver-specific A compartments	7	89280000	89300000	1.6096	-1.88881	3.49841	-	-	-	-	-	-
Liver-specific A compartments	7	89300000	89320000	1.84873	-1.86845	3.71718	-	-	-	-	-	-
Liver-specific A compartments	7	89320000	89340000	1.86425	-1.7227	3.58694	-	-	-	-	-	-
Liver-specific A compartments	7	89340000	89360000	2.00457	-1.55816	3.56273	-	-	-	-	-	-
Liver-specific A compartments	7	89360000	89380000	2.06802	-1.29676	3.36477	-	-	-	-	-	-
Liver-specific A compartments	7	89380000	89400000	1.95676	-1.05649	3.01326	-	-	-	-	-	-
Liver-specific A compartments	7	89400000	89420000	1.78476	-1.3266	3.11136	-	-	-	-	-	-
Liver-specific A compartments	7	89420000	89440000	1.64863	-1.87008	3.51871	-	-	-	-	-	-
Liver-specific A compartments	7	89440000	89460000	1.57026	-1.96963	3.53989	-	-	-	-	-	-
Liver-specific A compartments	7	89460000	89480000	1.70393	-2.01026	3.71418	-	-	-	-	-	-
Liver-specific A compartments	7	89480000	89500000	1.57786	-2.32666	3.90452	ENSSSCG00000043987	Unknown	0.83	0.94	0.178974	0.529233
Liver-specific A compartments	7	89500000	89520000	1.68679	-2.2523	3.93908	-	-	-	-	-	-
Liver-specific A compartments	7	89520000	89540000	1.47722	-2.29246	3.76968	-	-	-	-	-	-
Liver-specific A compartments	7	89540000	89560000	1.46319	-2.42391	3.8871	ENSSSCG00000048994	Unknown	1.3	1.86	-0.381002	0.360032
Liver-specific A compartments	7	89560000	89580000	1.4785	-2.47642	3.95492	ENSSSCG00000042739;ENSSSCG00000047586	Unknown;Unknown	0.93;1.58	0.9;3.01	0.382233458330338;-0.706908152663496	0.320473302823894;0.0288871252850897
Liver-specific A compartments	7	89580000	89600000	1.46794	-2.42536	3.8933	-	-	-	-	-	-
Liver-specific A compartments	7	89600000	89620000	1.68517	-2.41089	4.09606	-	-	-	-	-	-
Liver-specific A compartments	7	89620000	89640000	1.67054	-2.55492	4.22547	-	-	-	-	-	-
Liver-specific A compartments	7	89640000	89660000	1.46319	-2.54532	4.00851	-	-	-	-	-	-
Liver-specific A compartments	7	89660000	89680000	1.25367	-2.56121	3.81489	-	-	-	-	-	-
Liver-specific A compartments	7	89680000	89700000	1.31563	-2.68742	4.00305	-	-	-	-	-	-
Liver-specific A compartments	7	89700000	89720000	1.30712	-2.61455	3.92167	-	-	-	-	-	-
Liver-specific A compartments	7	89720000	89740000	1.4552	-2.44412	3.89932	-	-	-	-	-	-
Liver-specific A compartments	7	89740000	89760000	1.31784	-2.26897	3.58682	-	-	-	-	-	-
Liver-specific A compartments	7	89760000	89780000	1.22853	-1.94113	3.16965	-	-	-	-	-	-
Liver-specific A compartments	7	89780000	89800000	0.989958	-2.31852	3.30848	-	-	-	-	-	-
Liver-specific A compartments	7	89800000	89820000	1.02937	-2.65384	3.68321	-	-	-	-	-	-
Liver-specific A compartments	7	89820000	89840000	0.990292	-2.5902	3.58049	-	-	-	-	-	-
Liver-specific A compartments	7	89840000	89860000	0.855988	-2.71226	3.56825	-	-	-	-	-	-
Liver-specific A compartments	7	89860000	89880000	0.815713	-2.46823	3.28394	-	-	-	-	-	-
Liver-specific A compartments	7	89880000	89900000	0.720152	-2.54579	3.26594	-	-	-	-	-	-
Liver-specific A compartments	7	90120000	90140000	0.615974	-3.82124	4.43721	-	-	-	-	-	-
Liver-specific A compartments	7	90140000	90160000	0.5544	-3.76463	4.31903	-	-	-	-	-	-
Liver-specific A compartments	7	90160000	90180000	0.545251	-3.39579	3.94105	-	-	-	-	-	-
Liver-specific A compartments	7	90180000	90200000	0.76483	-3.14269	3.90752	ENSSSCG00000002284	CCDC196	0.24	0	-	-
Liver-specific A compartments	7	90200000	90220000	0.655661	-2.87495	3.53061	-	-	-	-	-	-
Liver-specific A compartments	7	90280000	90300000	0.675768	-2.26052	2.93628	-	-	-	-	-	-
Liver-specific A compartments	7	90300000	90320000	0.908702	-1.74743	2.65613	-	-	-	-	-	-
Liver-specific A compartments	7	90320000	90340000	1.12687	-1.00174	2.12861	-	-	-	-	-	-
Liver-specific A compartments	7	90400000	90420000	1.04745	-0.445746	1.49319	-	-	-	-	-	-
Liver-specific A compartments	7	90420000	90440000	1.04429	-0.479459	1.52374	-	-	-	-	-	-
Liver-specific A compartments	7	90440000	90460000	0.916207	-0.43164	1.34785	-	-	-	-	-	-
Liver-specific A compartments	7	90460000	90480000	1.01146	-0.443162	1.45462	-	-	-	-	-	-
Liver-specific A compartments	7	90480000	90500000	0.849575	-0.697534	1.54711	-	-	-	-	-	-
Liver-specific A compartments	7	90500000	90520000	0.79127	-0.688241	1.47951	-	-	-	-	-	-
[truncated: 7,932 more rows]

## Sheet: Sheet 3
A/B switches between liver and brain	Chromosome	Start	End	Mean A-B index in the liver	Mean A-B index in the brain	ΔA-B index (liver – brain)	GeneID	Symbol	Mean TPM in liver	Mean TPM in brain	log2FC of expression (liver / brain)	P-value of expression
Liver-specific A compartments	1	12220000	12240000	1.63324	-0.368831	2.00208	-	-	-	-	-	-
Liver-specific A compartments	1	12240000	12260000	1.7876	-0.350796	2.1384	-	-	-	-	-	-
Liver-specific A compartments	1	12260000	12280000	1.85066	-0.257262	2.10792	-	-	-	-	-	-
Liver-specific A compartments	1	12420000	12440000	0.978544	-0.236889	1.21543	-	-	-	-	-	-
Liver-specific A compartments	1	12440000	12460000	0.722958	-0.34991	1.07287	-	-	-	-	-	-
Liver-specific A compartments	1	12460000	12480000	0.488206	-0.574088	1.06229	-	-	-	-	-	-
Liver-specific A compartments	1	13740000	13760000	0.286766	-0.852185	1.13895	-	-	-	-	-	-
Liver-specific A compartments	1	13860000	13880000	0.425404	-0.564276	0.98968	-	-	-	-	-	-
Liver-specific A compartments	1	14220000	14240000	2.04853	-0.397394	2.44593	-	-	-	-	-	-
Liver-specific A compartments	1	14240000	14260000	1.93446	-1.00599	2.94045	-	-	-	-	-	-
Liver-specific A compartments	1	14260000	14280000	1.50455	-1.7041	3.20866	-	-	-	-	-	-
Liver-specific A compartments	1	14280000	14300000	1.19299	-1.87515	3.06814	-	-	-	-	-	-
Liver-specific A compartments	1	14300000	14320000	1.04049	-2.07732	3.11781	-	-	-	-	-	-
Liver-specific A compartments	1	14320000	14340000	0.966527	-2.11785	3.08437	-	-	-	-	-	-
Liver-specific A compartments	1	14340000	14360000	0.838719	-1.99307	2.83178	-	-	-	-	-	-
Liver-specific A compartments	1	14360000	14380000	0.825453	-2.37308	3.19853	-	-	-	-	-	-
Liver-specific A compartments	1	14380000	14400000	1.04303	-2.05221	3.09524	-	-	-	-	-	-
Liver-specific A compartments	1	14400000	14420000	1.0459	-1.91011	2.95601	-	-	-	-	-	-
Liver-specific A compartments	1	14420000	14440000	1.15927	-1.86392	3.02319	-	-	-	-	-	-
Liver-specific A compartments	1	14440000	14460000	0.998814	-1.50156	2.50037	-	-	-	-	-	-
Liver-specific A compartments	1	14460000	14480000	1.33641	-1.62526	2.96166	-	-	-	-	-	-
Liver-specific A compartments	1	14480000	14500000	1.70336	-1.01291	2.71627	ENSSSCG00000025777	ESR1	8.36	1.49	2.58697	5.66182e-08
Liver-specific A compartments	1	14500000	14520000	1.67271	-1.2073	2.88001	-	-	-	-	-	-
Liver-specific A compartments	1	14520000	14540000	1.51652	-0.993795	2.51032	-	-	-	-	-	-
Liver-specific A compartments	1	14540000	14560000	1.89948	-1.12668	3.02616	-	-	-	-	-	-
Liver-specific A compartments	1	14560000	14580000	2.04828	-1.18584	3.23413	-	-	-	-	-	-
Liver-specific A compartments	1	14580000	14600000	2.23742	-1.17149	3.40891	-	-	-	-	-	-
Liver-specific A compartments	1	14600000	14620000	2.20394	-0.608499	2.81244	-	-	-	-	-	-
Liver-specific A compartments	1	14620000	14640000	2.36641	-0.48414	2.85055	-	-	-	-	-	-
Liver-specific A compartments	1	14640000	14660000	2.52012	-0.392557	2.91267	-	-	-	-	-	-
Liver-specific A compartments	1	14680000	14700000	2.88621	-0.200445	3.08666	-	-	-	-	-	-
Liver-specific A compartments	1	17700000	17720000	1.0326	-0.368806	1.40141	-	-	-	-	-	-
Liver-specific A compartments	1	17720000	17740000	0.940408	-0.582049	1.52246	-	-	-	-	-	-
Liver-specific A compartments	1	17740000	17760000	0.719244	-0.764735	1.48398	-	-	-	-	-	-
Liver-specific A compartments	1	17760000	17780000	0.647401	-0.789532	1.43693	-	-	-	-	-	-
Liver-specific A compartments	1	17780000	17800000	0.715411	-0.914871	1.63028	-	-	-	-	-	-
Liver-specific A compartments	1	17800000	17820000	0.623492	-0.751729	1.37522	-	-	-	-	-	-
Liver-specific A compartments	1	17820000	17840000	0.646756	-0.680331	1.32709	-	-	-	-	-	-
Liver-specific A compartments	1	17840000	17860000	0.700535	-0.279529	0.980064	-	-	-	-	-	-
Liver-specific A compartments	1	17860000	17880000	0.740932	-0.441094	1.18203	-	-	-	-	-	-
Liver-specific A compartments	1	17880000	17900000	0.564277	-0.725008	1.28928	-	-	-	-	-	-
Liver-specific A compartments	1	17900000	17920000	0.392651	-0.784938	1.17759	-	-	-	-	-	-
Liver-specific A compartments	1	17920000	17940000	0.488564	-0.979417	1.46798	-	-	-	-	-	-
Liver-specific A compartments	1	17940000	17960000	0.605611	-0.93021	1.53582	ENSSSCG00000046147	Unknown	0.55	1.06	-0.769289	0.0988529
Liver-specific A compartments	1	17960000	17980000	0.375521	-0.967664	1.34318	-	-	-	-	-	-
Liver-specific A compartments	1	17980000	18000000	0.408218	-0.968019	1.37624	-	-	-	-	-	-
Liver-specific A compartments	1	18000000	18020000	0.350822	-1.32049	1.67131	-	-	-	-	-	-
Liver-specific A compartments	1	18020000	18040000	0.471906	-1.60352	2.07543	-	-	-	-	-	-
Liver-specific A compartments	1	18060000	18080000	0.277231	-1.5403	1.81753	-	-	-	-	-	-
Liver-specific A compartments	1	18120000	18140000	0.432626	-1.5827	2.01533	-	-	-	-	-	-
Liver-specific A compartments	1	18140000	18160000	0.329306	-1.55028	1.87958	-	-	-	-	-	-
Liver-specific A compartments	1	18160000	18180000	0.599243	-1.39136	1.99061	-	-	-	-	-	-
Liver-specific A compartments	1	18180000	18200000	0.865418	-1.23408	2.0995	-	-	-	-	-	-
Liver-specific A compartments	1	18200000	18220000	0.846655	-1.13386	1.98051	-	-	-	-	-	-
Liver-specific A compartments	1	18220000	18240000	0.864198	-1.08528	1.94947	-	-	-	-	-	-
Liver-specific A compartments	1	18240000	18260000	1.06098	-0.698575	1.75956	-	-	-	-	-	-
Liver-specific A compartments	1	18260000	18280000	1.0275	-0.745605	1.77311	-	-	-	-	-	-
Liver-specific A compartments	1	18280000	18300000	1.14229	-0.313328	1.45562	ENSSSCG00000048240	SAMD5	11.63	10.2	0.375039	0.11031
Liver-specific A compartments	1	18300000	18320000	1.10727	-0.539684	1.64695	-	-	-	-	-	-
Liver-specific A compartments	1	18320000	18340000	1.20637	-0.509558	1.71593	-	-	-	-	-	-
Liver-specific A compartments	1	18340000	18360000	1.16478	-0.424135	1.58892	-	-	-	-	-	-
Liver-specific A compartments	1	18360000	18380000	1.1709	-0.692811	1.86371	-	-	-	-	-	-
Liver-specific A compartments	1	18380000	18400000	1.23801	-0.644732	1.88274	-	-	-	-	-	-
Liver-specific A compartments	1	18400000	18420000	1.14761	-0.916335	2.06395	-	-	-	-	-	-
Liver-specific A compartments	1	18420000	18440000	0.97676	-0.925363	1.90212	-	-	-	-	-	-
Liver-specific A compartments	1	18440000	18460000	1.09516	-0.731527	1.82668	-	-	-	-	-	-
Liver-specific A compartments	1	18460000	18480000	1.34187	-0.571588	1.91346	-	-	-	-	-	-
Liver-specific A compartments	1	18520000	18540000	1.34625	-0.173338	1.51958	-	-	-	-	-	-
Liver-specific A compartments	1	18540000	18560000	0.91185	-1.054	1.96585	-	-	-	-	-	-
Liver-specific A compartments	1	18800000	18820000	0.577987	-1.05374	1.63173	-	-	-	-	-	-
Liver-specific A compartments	1	18820000	18840000	0.803833	-0.795141	1.59897	-	-	-	-	-	-
Liver-specific A compartments	1	18840000	18860000	0.606085	-0.559185	1.16527	-	-	-	-	-	-
Liver-specific A compartments	1	18860000	18880000	0.249014	-1.07534	1.32436	-	-	-	-	-	-
Liver-specific A compartments	1	19060000	19080000	0.516826	-0.584995	1.10182	-	-	-	-	-	-
Liver-specific A compartments	1	20600000	20620000	0.379497	-0.5518	0.931297	-	-	-	-	-	-
Liver-specific A compartments	1	20620000	20640000	0.488594	-0.529307	1.0179	-	-	-	-	-	-
Liver-specific A compartments	1	20680000	20700000	0.562045	-0.317008	0.879052	-	-	-	-	-	-
Liver-specific A compartments	1	20800000	20820000	0.757696	-0.290564	1.04826	-	-	-	-	-	-
Liver-specific A compartments	1	21140000	21160000	1.96973	-0.272695	2.24242	ENSSSCG00000004125	STX11	11.74	0.41	4.9242	7.6451e-25
Liver-specific A compartments	1	21180000	21200000	1.73749	-0.414632	2.15212	-	-	-	-	-	-
Liver-specific A compartments	1	21580000	21600000	2.20655	-0.414195	2.62075	-	-	-	-	-	-
Liver-specific A compartments	1	21600000	21620000	2.07752	-0.563243	2.64077	-	-	-	-	-	-
Liver-specific A compartments	1	21620000	21640000	2.07008	-0.726368	2.79644	-	-	-	-	-	-
Liver-specific A compartments	1	21640000	21660000	1.84413	-0.514748	2.35888	-	-	-	-	-	-
Liver-specific A compartments	1	21840000	21860000	1.17284	-0.39393	1.56677	-	-	-	-	-	-
Liver-specific A compartments	1	21860000	21880000	0.929144	-0.800157	1.7293	-	-	-	-	-	-
Liver-specific A compartments	1	21880000	21900000	0.875131	-0.948357	1.82349	-	-	-	-	-	-
Liver-specific A compartments	1	21900000	21920000	0.952353	-0.759276	1.71163	-	-	-	-	-	-
Liver-specific A compartments	1	21920000	21940000	0.758696	-0.594897	1.35359	-	-	-	-	-	-
Liver-specific A compartments	1	21940000	21960000	0.948308	-0.431879	1.38019	-	-	-	-	-	-
Liver-specific A compartments	1	21980000	22000000	1.19252	-0.246254	1.43878	-	-	-	-	-	-
Liver-specific A compartments	1	22000000	22020000	1.12209	-0.408698	1.53079	-	-	-	-	-	-
Liver-specific A compartments	1	22020000	22040000	1.20978	-0.513902	1.72368	-	-	-	-	-	-
Liver-specific A compartments	1	22040000	22060000	1.09116	-0.510652	1.60181	-	-	-	-	-	-
Liver-specific A compartments	1	22060000	22080000	1.26565	-0.633047	1.8987	-	-	-	-	-	-
Liver-specific A compartments	1	22080000	22100000	1.2318	-0.658392	1.89019	-	-	-	-	-	-
Liver-specific A compartments	1	22100000	22120000	1.41298	-0.731416	2.1444	-	-	-	-	-	-
Liver-specific A compartments	1	22120000	22140000	1.36516	-0.540235	1.90539	-	-	-	-	-	-
Liver-specific A compartments	1	22520000	22540000	0.274325	-0.76617	1.0405	-	-	-	-	-	-
Liver-specific A compartments	1	22700000	22720000	0.269321	-0.447867	0.717188	-	-	-	-	-	-
Liver-specific A compartments	1	22720000	22740000	0.442559	-0.590496	1.03305	-	-	-	-	-	-
Liver-specific A compartments	1	22740000	22760000	0.485407	-0.684933	1.17034	-	-	-	-	-	-
Liver-specific A compartments	1	22760000	22780000	0.493033	-0.675077	1.16811	-	-	-	-	-	-
Liver-specific A compartments	1	22780000	22800000	0.716094	-0.523361	1.23946	-	-	-	-	-	-
Liver-specific A compartments	1	22800000	22820000	0.791853	-0.57917	1.37102	ENSSSCG00000004139	ADGRG6	34.59	8.75	2.12028	1.39082e-07
Liver-specific A compartments	1	22820000	22840000	0.684463	-0.836048	1.52051	-	-	-	-	-	-
Liver-specific A compartments	1	22840000	22860000	0.598847	-0.744028	1.34287	-	-	-	-	-	-
Liver-specific A compartments	1	22860000	22880000	0.532529	-0.44471	0.977239	-	-	-	-	-	-
Liver-specific A compartments	1	24580000	24600000	0.232577	-0.55752	0.790097	-	-	-	-	-	-
Liver-specific A compartments	1	24600000	24620000	0.495258	-0.46276	0.958017	-	-	-	-	-	-
Liver-specific A compartments	1	24620000	24640000	0.681246	-0.422417	1.10366	-	-	-	-	-	-
Liver-specific A compartments	1	24640000	24660000	0.642779	-0.436095	1.07887	-	-	-	-	-	-
Liver-specific A compartments	1	24660000	24680000	0.416344	-0.294698	0.711042	-	-	-	-	-	-
Liver-specific A compartments	1	24680000	24700000	0.516236	-0.335805	0.852041	-	-	-	-	-	-
Liver-specific A compartments	1	24700000	24720000	0.349938	-0.273494	0.623433	-	-	-	-	-	-
Liver-specific A compartments	1	24740000	24760000	0.30219	-0.469303	0.771493	-	-	-	-	-	-
Liver-specific A compartments	1	24800000	24820000	0.624751	-0.34897	0.97372	-	-	-	-	-	-
Liver-specific A compartments	1	24820000	24840000	0.490979	-0.235968	0.726946	-	-	-	-	-	-
Liver-specific A compartments	1	24840000	24860000	0.545872	-0.586246	1.13212	-	-	-	-	-	-
Liver-specific A compartments	1	24860000	24880000	0.56214	-0.465457	1.0276	-	-	-	-	-	-
Liver-specific A compartments	1	24880000	24900000	0.679285	-0.489094	1.16838	-	-	-	-	-	-
Liver-specific A compartments	1	24900000	24920000	0.78173	-0.475009	1.25674	-	-	-	-	-	-
Liver-specific A compartments	1	24920000	24940000	0.931403	-0.37852	1.30992	-	-	-	-	-	-
Liver-specific A compartments	1	24940000	24960000	0.945405	-0.330296	1.2757	-	-	-	-	-	-
Liver-specific A compartments	1	24980000	25000000	1.01212	-0.382495	1.39462	-	-	-	-	-	-
Liver-specific A compartments	1	25000000	25020000	1.18458	-0.463544	1.64812	-	-	-	-	-	-
Liver-specific A compartments	1	25020000	25040000	1.0407	-0.616779	1.65748	-	-	-	-	-	-
Liver-specific A compartments	1	25040000	25060000	0.929205	-0.55322	1.48242	-	-	-	-	-	-
Liver-specific A compartments	1	25060000	25080000	0.989484	-0.464488	1.45397	-	-	-	-	-	-
Liver-specific A compartments	1	25080000	25100000	1.1501	-0.558158	1.70826	-	-	-	-	-	-
Liver-specific A compartments	1	25100000	25120000	1.43334	-0.59124	2.02458	-	-	-	-	-	-
Liver-specific A compartments	1	25120000	25140000	1.13243	-0.315154	1.44758	-	-	-	-	-	-
Liver-specific A compartments	1	25180000	25200000	0.655667	-0.366406	1.02207	-	-	-	-	-	-
Liver-specific A compartments	1	25200000	25220000	0.635007	-0.388746	1.02375	-	-	-	-	-	-
Liver-specific A compartments	1	25220000	25240000	0.541556	-0.302034	0.84359	ENSSSCG00000004143	TXLNB	0.3	0.47	-	-
Liver-specific A compartments	1	25260000	25280000	0.418286	-0.42539	0.843676	-	-	-	-	-	-
Liver-specific A compartments	1	25280000	25300000	0.683903	-0.170811	0.854713	-	-	-	-	-	-
Liver-specific A compartments	1	25400000	25420000	1.20188	-0.2919	1.49378	-	-	-	-	-	-
Liver-specific A compartments	1	26020000	26040000	1.58833	-0.564263	2.15259	ENSSSCG00000048346	SMIM28	0.03	0	-	-
Liver-specific A compartments	1	26040000	26060000	1.49981	-0.602368	2.10218	ENSSSCG00000004151	Unknown	1.69	1.23	0.879491	0.615599
Liver-specific A compartments	1	26060000	26080000	1.38547	-0.504472	1.88994	-	-	-	-	-	-
Liver-specific A compartments	1	26080000	26100000	1.18465	-0.270803	1.45545	-	-	-	-	-	-
Liver-specific A compartments	1	26120000	26140000	1.37399	-0.305377	1.67936	-	-	-	-	-	-
Liver-specific A compartments	1	26320000	26340000	2.10697	-0.310019	2.41699	-	-	-	-	-	-
Liver-specific A compartments	1	26340000	26360000	2.15844	-0.299267	2.45771	-	-	-	-	-	-
Liver-specific A compartments	1	26360000	26380000	2.04933	-0.247344	2.29668	-	-	-	-	-	-
Liver-specific A compartments	1	27180000	27200000	2.65811	-0.184733	2.84284	-	-	-	-	-	-
Liver-specific A compartments	1	27780000	27800000	2.18354	-0.304592	2.48814	-	-	-	-	-	-
Liver-specific A compartments	1	27800000	27820000	2.33394	-0.20351	2.53745	-	-	-	-	-	-
Liver-specific A compartments	1	28360000	28380000	2.42385	-0.269829	2.69368	-	-	-	-	-	-
Liver-specific A compartments	1	28440000	28460000	2.39752	-0.424915	2.82244	-	-	-	-	-	-
Liver-specific A compartments	1	28460000	28480000	2.32291	-0.365702	2.68861	-	-	-	-	-	-
Liver-specific A compartments	1	28480000	28500000	2.3284	-0.49789	2.82629	-	-	-	-	-	-
Liver-specific A compartments	1	28640000	28660000	2.31775	-0.243634	2.56139	-	-	-	-	-	-
Liver-specific A compartments	1	28660000	28680000	2.08932	-0.303673	2.393	-	-	-	-	-	-
Liver-specific A compartments	1	28680000	28700000	2.0155	-0.662806	2.67831	-	-	-	-	-	-
Liver-specific A compartments	1	28700000	28720000	2.01137	-0.568764	2.58014	-	-	-	-	-	-
Liver-specific A compartments	1	28720000	28740000	2.08953	-0.736346	2.82588	-	-	-	-	-	-
Liver-specific A compartments	1	28740000	28760000	2.17359	-0.758304	2.93189	-	-	-	-	-	-
Liver-specific A compartments	1	28760000	28780000	2.1424	-0.549595	2.69199	-	-	-	-	-	-
Liver-specific A compartments	1	28780000	28800000	2.08696	-0.846581	2.93354	-	-	-	-	-	-
Liver-specific A compartments	1	28800000	28820000	2.31378	-0.849991	3.16377	-	-	-	-	-	-
Liver-specific A compartments	1	28820000	28840000	2.3403	-0.508908	2.84921	-	-	-	-	-	-
Liver-specific A compartments	1	28880000	28900000	2.40377	-0.200854	2.60462	-	-	-	-	-	-
Liver-specific A compartments	1	28900000	28920000	2.47888	-0.339055	2.81794	ENSSSCG00000041469	H2AZ1	0.06	0.18	-	-
Liver-specific A compartments	1	28920000	28940000	2.54038	-0.366478	2.90686	-	-	-	-	-	-
Liver-specific A compartments	1	29960000	29980000	0.937349	-0.489568	1.42692	ENSSSCG00000033258	TCF21	3.82	0.01	9.1417	4.94995e-13
Liver-specific A compartments	1	29980000	30000000	0.633283	-0.884239	1.51752	-	-	-	-	-	-
Liver-specific A compartments	1	30000000	30020000	0.484817	-1.10193	1.58675	-	-	-	-	-	-
Liver-specific A compartments	1	30860000	30880000	0.487464	-0.842121	1.32958	-	-	-	-	-	-
Liver-specific A compartments	1	30880000	30900000	0.650104	-0.467477	1.11758	-	-	-	-	-	-
Liver-specific A compartments	1	30960000	30980000	2.06086	-0.31752	2.37838	ENSSSCG00000004179	VNN2	15.59	0.97	4.30175	4.89777e-20
Liver-specific A compartments	1	30980000	31000000	1.7798	-0.632354	2.41215	ENSSSCG00000004180	VNN3	158.59	0	14.468	9.25358e-40
Liver-specific A compartments	1	31000000	31020000	1.50168	-0.730395	2.23207	ENSSSCG00000004181	VNN1	152.93	0.2	9.4107	2.1832e-65
Liver-specific A compartments	1	31020000	31040000	1.21271	-0.872336	2.08505	-	-	-	-	-	-
Liver-specific A compartments	1	31040000	31060000	1.13082	-1.05481	2.18564	-	-	-	-	-	-
Liver-specific A compartments	1	31060000	31080000	0.793845	-0.954691	1.74854	ENSSSCG00000004183	TAAR2	0.01	0	-	-
Liver-specific A compartments	1	31080000	31100000	0.973346	-1.07185	2.0452	ENSSSCG00000004184;ENSSSCG00000037870	Unknown;Unknown	0;0.03	0;0	-;-	-;-
Liver-specific A compartments	1	31100000	31120000	0.766064	-0.651452	1.41752	ENSSSCG00000037590	TAAR8	0.04	0	-	-
Liver-specific A compartments	1	31120000	31140000	0.961501	-0.77441	1.73591	ENSSSCG00000040065	TAAR6	0.01	0.03	-	-
Liver-specific A compartments	1	31140000	31160000	1.09684	-0.399724	1.49657	ENSSSCG00000004186;ENSSSCG00000004187	TAAR8;Unknown	0;0.91	0.03;1.93	-;-0.981258607452871	-;0.00544758389977085
Liver-specific A compartments	1	31260000	31280000	0.672871	-0.376547	1.04942	-	-	-	-	-	-
Liver-specific A compartments	1	31280000	31300000	0.522719	-0.437697	0.960416	ENSSSCG00000004191	MOXD1	2.68	10.22	-1.92665	1.38428e-05
Liver-specific A compartments	1	31300000	31320000	0.447952	-0.794553	1.2425	-	-	-	-	-	-
Liver-specific A compartments	1	31320000	31340000	0.531742	-0.624764	1.15651	-	-	-	-	-	-
Liver-specific A compartments	1	31340000	31360000	0.543456	-0.432023	0.975479	-	-	-	-	-	-
Liver-specific A compartments	1	31400000	31420000	0.9504	-0.852613	1.80301	-	-	-	-	-	-
Liver-specific A compartments	1	31420000	31440000	0.678097	-0.813546	1.49164	-	-	-	-	-	-
Liver-specific A compartments	1	31440000	31460000	0.734476	-0.955806	1.69028	-	-	-	-	-	-
Liver-specific A compartments	1	31460000	31480000	0.760715	-0.601138	1.36185	-	-	-	-	-	-
Liver-specific A compartments	1	31480000	31500000	0.706048	-0.750327	1.45638	-	-	-	-	-	-
Liver-specific A compartments	1	31500000	31520000	0.856866	-0.59362	1.45049	-	-	-	-	-	-
Liver-specific A compartments	1	31520000	31540000	0.642083	-0.684013	1.3261	-	-	-	-	-	-
Liver-specific A compartments	1	31540000	31560000	0.576806	-0.916636	1.49344	-	-	-	-	-	-
Liver-specific A compartments	1	31560000	31580000	0.879569	-0.797808	1.67738	-	-	-	-	-	-
Liver-specific A compartments	1	31580000	31600000	1.02671	-0.863887	1.8906	-	-	-	-	-	-
Liver-specific A compartments	1	31600000	31620000	0.800122	-1.123	1.92312	-	-	-	-	-	-
Liver-specific A compartments	1	31620000	31640000	1.06649	-0.881305	1.9478	-	-	-	-	-	-
Liver-specific A compartments	1	31680000	31700000	1.02001	-0.475073	1.49508	-	-	-	-	-	-
Liver-specific A compartments	1	31720000	31740000	1.49469	-0.713844	2.20854	-	-	-	-	-	-
Liver-specific A compartments	1	31740000	31760000	1.40908	-0.701679	2.11076	-	-	-	-	-	-
Liver-specific A compartments	1	31760000	31780000	1.61193	-0.68274	2.29467	-	-	-	-	-	-
Liver-specific A compartments	1	31820000	31840000	1.78917	-0.527768	2.31694	-	-	-	-	-	-
Liver-specific A compartments	1	31840000	31860000	1.69689	-0.732943	2.42983	-	-	-	-	-	-
Liver-specific A compartments	1	31860000	31880000	1.82336	-0.663441	2.4868	-	-	-	-	-	-
Liver-specific A compartments	1	31900000	31920000	2.29725	-0.626031	2.92328	-	-	-	-	-	-
Liver-specific A compartments	1	31920000	31940000	2.55515	-0.462716	3.01787	-	-	-	-	-	-
Liver-specific A compartments	1	32640000	32660000	1.16847	-0.530095	1.69857	ENSSSCG00000033538	SMLR1	127.87	0.28	9.04556	5.37652e-67
Liver-specific A compartments	1	32660000	32680000	0.807083	-0.720137	1.52722	-	-	-	-	-	-
Liver-specific A compartments	1	33340000	33360000	0.899025	-0.730393	1.62942	-	-	-	-	-	-
Liver-specific A compartments	1	33360000	33380000	0.575964	-0.835517	1.41148	-	-	-	-	-	-
Liver-specific A compartments	1	33380000	33400000	0.554302	-0.838682	1.39298	-	-	-	-	-	-
Liver-specific A compartments	1	33400000	33420000	0.546351	-0.829102	1.37545	-	-	-	-	-	-
Liver-specific A compartments	1	33420000	33440000	0.741158	-0.776923	1.51808	-	-	-	-	-	-
Liver-specific A compartments	1	33440000	33460000	0.693878	-0.751805	1.44568	-	-	-	-	-	-
Liver-specific A compartments	1	33460000	33480000	0.617033	-0.859073	1.47611	ENSSSCG00000004204	TMEM244	0.04	0	-	-
Liver-specific A compartments	1	33480000	33500000	0.789536	-0.391685	1.18122	-	-	-	-	-	-
Liver-specific A compartments	1	34660000	34680000	0.212969	-0.457057	0.670027	-	-	-	-	-	-
Liver-specific A compartments	1	34880000	34900000	0.860574	-0.438133	1.29871	-	-	-	-	-	-
Liver-specific A compartments	1	34900000	34920000	0.720938	-0.33694	1.05788	-	-	-	-	-	-
Liver-specific A compartments	1	34960000	34980000	0.456065	-0.357012	0.813077	-	-	-	-	-	-
Liver-specific A compartments	1	34980000	35000000	0.651295	-0.473064	1.12436	-	-	-	-	-	-
Liver-specific A compartments	1	35000000	35020000	0.484924	-0.484897	0.969821	-	-	-	-	-	-
Liver-specific A compartments	1	35020000	35040000	0.453887	-0.445903	0.899789	-	-	-	-	-	-
Liver-specific A compartments	1	35040000	35060000	0.481366	-0.297804	0.77917	-	-	-	-	-	-
Liver-specific A compartments	1	35100000	35120000	0.437721	-0.251422	0.689143	-	-	-	-	-	-
Liver-specific A compartments	1	42580000	42600000	0.414175	-1.51426	1.92844	-	-	-	-	-	-
Liver-specific A compartments	1	42620000	42640000	0.5114	-1.1692	1.6806	-	-	-	-	-	-
Liver-specific A compartments	1	42640000	42660000	0.713698	-0.958753	1.67245	-	-	-	-	-	-
Liver-specific A compartments	1	42660000	42680000	1.05654	-0.660386	1.71692	-	-	-	-	-	-
Liver-specific A compartments	1	42680000	42700000	1.28318	-0.70189	1.98507	-	-	-	-	-	-
Liver-specific A compartments	1	42700000	42720000	1.6786	-0.505686	2.18429	-	-	-	-	-	-
Liver-specific A compartments	1	42740000	42760000	1.79232	-0.260955	2.05327	-	-	-	-	-	-
Liver-specific A compartments	1	42760000	42780000	1.44974	-0.692267	2.142	-	-	-	-	-	-
Liver-specific A compartments	1	42780000	42800000	1.44228	-1.05776	2.50004	-	-	-	-	-	-
Liver-specific A compartments	1	42800000	42820000	1.30676	-1.13408	2.44084	-	-	-	-	-	-
Liver-specific A compartments	1	42820000	42840000	1.35701	-1.06139	2.4184	-	-	-	-	-	-
Liver-specific A compartments	1	42840000	42860000	1.23664	-0.993834	2.23047	-	-	-	-	-	-
Liver-specific A compartments	1	42860000	42880000	1.07881	-0.764875	1.84369	-	-	-	-	-	-
Liver-specific A compartments	1	42880000	42900000	0.92073	-0.64578	1.56651	-	-	-	-	-	-
Liver-specific A compartments	1	42900000	42920000	0.675777	-0.331716	1.00749	-	-	-	-	-	-
Liver-specific A compartments	1	44200000	44220000	0.612205	-0.377846	0.99005	-	-	-	-	-	-
Liver-specific A compartments	1	44400000	44420000	0.639451	-0.8148	1.45425	ENSSSCG00000026978	ROS1	2.88	0.05	5.89844	NA
Liver-specific A compartments	1	44420000	44440000	0.476041	-1.28539	1.76144	-	-	-	-	-	-
Liver-specific A compartments	1	44980000	45000000	0.718874	-0.595556	1.31443	ENSSSCG00000023834	RSPH4A	0.14	1.48	-3.54425	3.17606e-05
Liver-specific A compartments	1	45000000	45020000	0.5331	-1.27214	1.80524	-	-	-	-	-	-
Liver-specific A compartments	1	45040000	45060000	0.843498	-0.772109	1.61561	-	-	-	-	-	-
Liver-specific A compartments	1	45060000	45080000	1.56841	-1.05737	2.62578	-	-	-	-	-	-
Liver-specific A compartments	1	45080000	45100000	1.70521	-1.25583	2.96104	-	-	-	-	-	-
Liver-specific A compartments	1	45100000	45120000	1.8384	-0.972386	2.81079	-	-	-	-	-	-
Liver-specific A compartments	1	45120000	45140000	2.16212	-0.826757	2.98888	-	-	-	-	-	-
Liver-specific A compartments	1	45140000	45160000	2.40097	-0.293452	2.69442	-	-	-	-	-	-
Liver-specific A compartments	1	45320000	45340000	1.06396	-0.60479	1.66875	-	-	-	-	-	-
Liver-specific A compartments	1	45340000	45360000	0.679026	-0.83744	1.51647	-	-	-	-	-	-
Liver-specific A compartments	1	52880000	52900000	0.498437	-1.19234	1.69078	-	-	-	-	-	-
Liver-specific A compartments	1	54640000	54660000	0.44093	-0.251408	0.692338	-	-	-	-	-	-
Liver-specific A compartments	1	56200000	56220000	1.57244	-0.272563	1.845	-	-	-	-	-	-
Liver-specific A compartments	1	56220000	56240000	1.38192	-0.426843	1.80876	-	-	-	-	-	-
Liver-specific A compartments	1	56240000	56260000	1.26321	-0.315698	1.57891	-	-	-	-	-	-
Liver-specific A compartments	1	56280000	56300000	0.871122	-0.197173	1.0683	-	-	-	-	-	-
Liver-specific A compartments	1	56300000	56320000	0.943802	-0.484713	1.42851	-	-	-	-	-	-
Liver-specific A compartments	1	56320000	56340000	0.733331	-0.45982	1.19315	-	-	-	-	-	-
Liver-specific A compartments	1	56340000	56360000	0.484692	-0.645451	1.13014	-	-	-	-	-	-
Liver-specific A compartments	1	56360000	56380000	0.360665	-0.858892	1.21956	ENSSSCG00000004308	SPACA1	11.43	0.35	5.2428	1.66323e-07
Liver-specific A compartments	1	58020000	58040000	1.24364	-0.398191	1.64183	-	-	-	-	-	-
Liver-specific A compartments	1	58040000	58060000	1.29157	-0.185441	1.47701	-	-	-	-	-	-
Liver-specific A compartments	1	71020000	71040000	0.438785	-0.29607	0.734855	-	-	-	-	-	-
Liver-specific A compartments	1	71040000	71060000	0.587124	-0.358317	0.945441	-	-	-	-	-	-
Liver-specific A compartments	1	71060000	71080000	0.675395	-0.439664	1.11506	-	-	-	-	-	-
Liver-specific A compartments	1	71120000	71140000	0.769739	-0.320366	1.09011	-	-	-	-	-	-
Liver-specific A compartments	1	71140000	71160000	0.791672	-0.299294	1.09097	-	-	-	-	-	-
Liver-specific A compartments	1	71180000	71200000	1.06855	-0.508439	1.57699	-	-	-	-	-	-
Liver-specific A compartments	1	71200000	71220000	0.795749	-1.16311	1.95886	-	-	-	-	-	-
Liver-specific A compartments	1	71220000	71240000	0.544917	-1.14619	1.69111	-	-	-	-	-	-
Liver-specific A compartments	1	71240000	71260000	0.528375	-1.44082	1.96919	-	-	-	-	-	-
Liver-specific A compartments	1	71260000	71280000	0.543906	-1.05738	1.60129	-	-	-	-	-	-
Liver-specific A compartments	1	71280000	71300000	0.527456	-0.534577	1.06203	-	-	-	-	-	-
Liver-specific A compartments	1	71300000	71320000	0.387229	-0.569546	0.956774	-	-	-	-	-	-
Liver-specific A compartments	1	71500000	71520000	0.740311	-0.838138	1.57845	-	-	-	-	-	-
Liver-specific A compartments	1	71520000	71540000	0.847773	-0.439754	1.28753	-	-	-	-	-	-
Liver-specific A compartments	1	71540000	71560000	1.0545	-0.416757	1.47126	-	-	-	-	-	-
Liver-specific A compartments	1	71560000	71580000	1.36705	-0.403898	1.77095	-	-	-	-	-	-
Liver-specific A compartments	1	71740000	71760000	0.842481	-0.576844	1.41932	-	-	-	-	-	-
Liver-specific A compartments	1	71760000	71780000	0.761754	-0.815522	1.57728	-	-	-	-	-	-
Liver-specific A compartments	1	71780000	71800000	0.732515	-0.765223	1.49774	-	-	-	-	-	-
Liver-specific A compartments	1	71800000	71820000	0.65506	-0.753919	1.40898	-	-	-	-	-	-
Liver-specific A compartments	1	71820000	71840000	0.753314	-0.513447	1.26676	-	-	-	-	-	-
Liver-specific A compartments	1	71840000	71860000	0.7875	-0.457011	1.24451	-	-	-	-	-	-
Liver-specific A compartments	1	71860000	71880000	0.695719	-0.668993	1.36471	-	-	-	-	-	-
Liver-specific A compartments	1	71880000	71900000	0.751065	-0.559619	1.31068	-	-	-	-	-	-
Liver-specific A compartments	1	71900000	71920000	0.783225	-0.428178	1.2114	-	-	-	-	-	-
Liver-specific A compartments	1	71920000	71940000	0.674633	-0.490035	1.16467	-	-	-	-	-	-
Liver-specific A compartments	1	71940000	71960000	0.725305	-0.354935	1.08024	-	-	-	-	-	-
Liver-specific A compartments	1	72160000	72180000	1.0996	-0.342801	1.4424	-	-	-	-	-	-
Liver-specific A compartments	1	72260000	72280000	1.59657	-0.248681	1.84525	-	-	-	-	-	-
Liver-specific A compartments	1	72540000	72560000	1.93727	-0.53268	2.46995	-	-	-	-	-	-
Liver-specific A compartments	1	72560000	72580000	1.88951	-0.916645	2.80615	-	-	-	-	-	-
Liver-specific A compartments	1	72580000	72600000	1.68004	-1.14298	2.82302	-	-	-	-	-	-
Liver-specific A compartments	1	72600000	72620000	1.84102	-0.929844	2.77087	-	-	-	-	-	-
Liver-specific A compartments	1	72620000	72640000	1.87043	-0.483019	2.35344	-	-	-	-	-	-
Liver-specific A compartments	1	72640000	72660000	1.98713	-0.719487	2.70662	-	-	-	-	-	-
Liver-specific A compartments	1	72660000	72680000	2.02331	-0.912486	2.9358	-	-	-	-	-	-
Liver-specific A compartments	1	72680000	72700000	2.37622	-0.337454	2.71368	-	-	-	-	-	-
Liver-specific A compartments	1	72700000	72720000	2.53156	-0.153022	2.68458	ENSSSCG00000046528	Unknown	0.79	0.01	7.78702	3.15607e-07
Liver-specific A compartments	1	72720000	72740000	2.19802	-0.480723	2.67874	-	-	-	-	-	-
Liver-specific A compartments	1	72740000	72760000	2.36096	-0.160951	2.52191	-	-	-	-	-	-
Liver-specific A compartments	1	72840000	72860000	2.24015	-0.358727	2.59887	-	-	-	-	-	-
Liver-specific A compartments	1	72860000	72880000	1.84215	-0.824754	2.6669	-	-	-	-	-	-
Liver-specific A compartments	1	72880000	72900000	1.77655	-1.00213	2.77868	-	-	-	-	-	-
Liver-specific A compartments	1	72900000	72920000	1.5956	-1.04787	2.64346	-	-	-	-	-	-
Liver-specific A compartments	1	72920000	72940000	1.56682	-1.29799	2.86481	-	-	-	-	-	-
Liver-specific A compartments	1	72940000	72960000	1.75473	-1.33249	3.08721	-	-	-	-	-	-
Liver-specific A compartments	1	72960000	72980000	1.72252	-1.45337	3.17588	-	-	-	-	-	-
Liver-specific A compartments	1	72980000	73000000	1.64346	-1.48099	3.12445	-	-	-	-	-	-
Liver-specific A compartments	1	73000000	73020000	1.62819	-1.64015	3.26833	-	-	-	-	-	-
Liver-specific A compartments	1	73020000	73040000	1.6352	-1.8621	3.4973	-	-	-	-	-	-
Liver-specific A compartments	1	73040000	73060000	1.66873	-1.61234	3.28107	-	-	-	-	-	-
Liver-specific A compartments	1	73060000	73080000	1.68975	-1.53102	3.22077	-	-	-	-	-	-
Liver-specific A compartments	1	73080000	73100000	1.77946	-1.22079	3.00025	-	-	-	-	-	-
Liver-specific A compartments	1	73100000	73120000	1.8054	-0.794129	2.59953	-	-	-	-	-	-
Liver-specific A compartments	1	73440000	73460000	2.16931	-0.191034	2.36034	-	-	-	-	-	-
Liver-specific A compartments	1	73460000	73480000	2.27547	-0.12302	2.39849	-	-	-	-	-	-
Liver-specific A compartments	1	75600000	75620000	1.90829	-0.181346	2.08964	-	-	-	-	-	-
Liver-specific A compartments	1	75640000	75660000	1.97042	-0.246574	2.217	-	-	-	-	-	-
Liver-specific A compartments	1	75860000	75880000	1.40742	-0.263806	1.67122	-	-	-	-	-	-
Liver-specific A compartments	1	75880000	75900000	1.15863	-0.479387	1.63801	-	-	-	-	-	-
Liver-specific A compartments	1	75900000	75920000	1.15183	-0.473548	1.62538	-	-	-	-	-	-
Liver-specific A compartments	1	75920000	75940000	1.19513	-0.41658	1.61171	-	-	-	-	-	-
Liver-specific A compartments	1	75940000	75960000	1.03441	-0.329544	1.36396	-	-	-	-	-	-
Liver-specific A compartments	1	75960000	75980000	1.29103	-0.32903	1.62006	ENSSSCG00000004406	GPR6	0	4.54	-9.40037	1.8249e-13
Liver-specific A compartments	1	76020000	76040000	0.83371	-0.447075	1.28078	-	-	-	-	-	-
Liver-specific A compartments	1	76260000	76280000	1.86692	-0.308037	2.17495	-	-	-	-	-	-
Liver-specific A compartments	1	76440000	76460000	1.82698	-0.229774	2.05675	-	-	-	-	-	-
Liver-specific A compartments	1	76460000	76480000	1.69629	-0.264977	1.96127	ENSSSCG00000004399	SLC22A16	3.84	0.52	3.14115	1.94125e-07
Liver-specific A compartments	1	76480000	76500000	1.87443	-0.28459	2.15902	-	-	-	-	-	-
Liver-specific A compartments	1	84080000	84100000	0.372727	-0.337442	0.710169	-	-	-	-	-	-
Liver-specific A compartments	1	84120000	84140000	0.271146	-0.31469	0.585835	-	-	-	-	-	-
Liver-specific A compartments	1	84140000	84160000	0.225535	-0.401477	0.627013	-	-	-	-	-	-
Liver-specific A compartments	1	84300000	84320000	0.266595	-0.816262	1.08286	-	-	-	-	-	-
Liver-specific A compartments	1	84320000	84340000	0.411111	-0.77641	1.18752	-	-	-	-	-	-
Liver-specific A compartments	1	84340000	84360000	0.551751	-0.725417	1.27717	-	-	-	-	-	-
Liver-specific A compartments	1	84360000	84380000	0.619411	-0.520395	1.13981	ENSSSCG00000031482	Unknown	0	0	-	-
Liver-specific A compartments	1	84420000	84440000	0.74997	-0.477293	1.22726	-	-	-	-	-	-
Liver-specific A compartments	1	84440000	84460000	1.02683	-0.514757	1.54159	-	-	-	-	-	-
Liver-specific A compartments	1	84460000	84480000	1.17062	-0.463409	1.63403	-	-	-	-	-	-
Liver-specific A compartments	1	84480000	84500000	1.19888	-0.620472	1.81935	-	-	-	-	-	-
Liver-specific A compartments	1	84500000	84520000	1.18348	-0.368179	1.55166	-	-	-	-	-	-
Liver-specific A compartments	1	84560000	84580000	0.538358	-0.423966	0.962324	-	-	-	-	-	-
Liver-specific A compartments	1	84580000	84600000	0.343071	-0.827671	1.17074	-	-	-	-	-	-
Liver-specific A compartments	1	84620000	84640000	0.140749	-1.06906	1.20981	-	-	-	-	-	-
Liver-specific A compartments	1	87080000	87100000	0.476085	-0.224081	0.700166	-	-	-	-	-	-
Liver-specific A compartments	1	99340000	99360000	1.84434	-0.442164	2.28651	-	-	-	-	-	-
Liver-specific A compartments	1	99360000	99380000	1.64987	-0.802696	2.45256	-	-	-	-	-	-
Liver-specific A compartments	1	99380000	99400000	1.63053	-0.80173	2.43226	-	-	-	-	-	-
Liver-specific A compartments	1	99400000	99420000	1.51434	-0.578626	2.09296	-	-	-	-	-	-
Liver-specific A compartments	1	99500000	99520000	1.62544	-0.562631	2.18807	-	-	-	-	-	-
Liver-specific A compartments	1	99520000	99540000	1.57951	-0.611097	2.19061	-	-	-	-	-	-
Liver-specific A compartments	1	99540000	99560000	1.44591	-0.835077	2.28098	-	-	-	-	-	-
Liver-specific A compartments	1	99560000	99580000	1.33099	-0.936969	2.26796	-	-	-	-	-	-
Liver-specific A compartments	1	99580000	99600000	1.34427	-0.933447	2.27771	-	-	-	-	-	-
Liver-specific A compartments	1	99600000	99620000	1.29308	-0.969128	2.26221	-	-	-	-	-	-
Liver-specific A compartments	1	99620000	99640000	1.28873	-0.922051	2.21078	-	-	-	-	-	-
Liver-specific A compartments	1	99640000	99660000	1.4692	-0.749652	2.21886	-	-	-	-	-	-
Liver-specific A compartments	1	99660000	99680000	1.34913	-0.857737	2.20687	-	-	-	-	-	-
Liver-specific A compartments	1	99680000	99700000	1.36379	-0.895011	2.2588	-	-	-	-	-	-
Liver-specific A compartments	1	99700000	99720000	1.3613	-0.918237	2.27954	-	-	-	-	-	-
Liver-specific A compartments	1	99720000	99740000	1.5249	-0.684962	2.20987	ENSSSCG00000049462	Unknown	1.7	2.27	-0.492797	0.106007
Liver-specific A compartments	1	99740000	99760000	1.45283	-0.796781	2.24961	ENSSSCG00000045942	Unknown	2.65	4.95	-0.746501	0.0157613
Liver-specific A compartments	1	99760000	99780000	1.60051	-0.680151	2.28066	-	-	-	-	-	-
Liver-specific A compartments	1	99780000	99800000	1.67983	-0.573546	2.25337	-	-	-	-	-	-
Liver-specific A compartments	1	100720000	100740000	1.04002	-0.257591	1.29761	-	-	-	-	-	-
Liver-specific A compartments	1	100740000	100760000	0.75975	-0.472035	1.23178	-	-	-	-	-	-
Liver-specific A compartments	1	100760000	100780000	0.57331	-0.346099	0.919409	-	-	-	-	-	-
Liver-specific A compartments	1	100780000	100800000	0.503726	-0.568313	1.07204	-	-	-	-	-	-
Liver-specific A compartments	1	100840000	100860000	0.512107	-0.982403	1.49451	-	-	-	-	-	-
Liver-specific A compartments	1	112220000	112240000	0.769255	-0.341606	1.11086	-	-	-	-	-	-
Liver-specific A compartments	1	115520000	115540000	0.511629	-0.257418	0.769046	-	-	-	-	-	-
Liver-specific A compartments	1	115540000	115560000	0.375071	-0.507387	0.882458	-	-	-	-	-	-
Liver-specific A compartments	1	115640000	115660000	0.352359	-0.876802	1.22916	-	-	-	-	-	-
Liver-specific A compartments	1	115680000	115700000	0.566406	-0.49754	1.06395	-	-	-	-	-	-
Liver-specific A compartments	1	115700000	115720000	0.754328	-0.157336	0.911664	-	-	-	-	-	-
Liver-specific A compartments	1	115900000	115920000	0.935076	-0.292252	1.22733	-	-	-	-	-	-
Liver-specific A compartments	1	115960000	115980000	0.822777	-0.206218	1.02899	-	-	-	-	-	-
Liver-specific A compartments	1	115980000	116000000	0.634816	-0.347761	0.982577	-	-	-	-	-	-
Liver-specific A compartments	1	116000000	116020000	0.523684	-0.392698	0.916382	-	-	-	-	-	-
Liver-specific A compartments	1	116020000	116040000	0.50878	-0.302091	0.810871	-	-	-	-	-	-
Liver-specific A compartments	1	116060000	116080000	0.361164	-0.238708	0.599872	-	-	-	-	-	-
Liver-specific A compartments	1	118880000	118900000	0.39073	-0.648354	1.03908	-	-	-	-	-	-
Liver-specific A compartments	1	118940000	118960000	0.730769	-0.219979	0.950748	-	-	-	-	-	-
Liver-specific A compartments	1	119220000	119240000	0.971705	-0.106139	1.07784	-	-	-	-	-	-
Liver-specific A compartments	1	119240000	119260000	0.929981	-0.228729	1.15871	-	-	-	-	-	-
Liver-specific A compartments	1	119340000	119360000	0.909019	-0.118745	1.02776	-	-	-	-	-	-
Liver-specific A compartments	1	119400000	119420000	0.76399	-0.587148	1.35114	ENSSSCG00000004621	MYO5C	3.47	0.11	5.1637	3.54785e-14
Liver-specific A compartments	1	119420000	119440000	0.627212	-0.837694	1.46491	-	-	-	-	-	-
Liver-specific A compartments	1	119440000	119460000	0.644715	-0.794712	1.43943	-	-	-	-	-	-
Liver-specific A compartments	1	119460000	119480000	0.799375	-0.260636	1.06001	-	-	-	-	-	-
Liver-specific A compartments	1	119480000	119500000	0.785638	-0.511124	1.29676	ENSSSCG00000004622	GNB5	14.43	128.92	-3.00449	1.4397e-38
Liver-specific A compartments	1	119500000	119520000	0.827564	-0.642495	1.47006	-	-	-	-	-	-
Liver-specific A compartments	1	119520000	119540000	0.807496	-0.465839	1.27334	-	-	-	-	-	-
Liver-specific A compartments	1	119560000	119580000	0.93143	-0.547439	1.47887	-	-	-	-	-	-
Liver-specific A compartments	1	119580000	119600000	0.900642	-0.852855	1.7535	ENSSSCG00000004623	Unknown	0.08	0.23	-	-
Liver-specific A compartments	1	119600000	119620000	0.855443	-1.22033	2.07578	-	-	-	-	-	-
Liver-specific A compartments	1	119620000	119640000	0.976554	-1.40154	2.37809	-	-	-	-	-	-
Liver-specific A compartments	1	119640000	119660000	1.19261	-1.12099	2.3136	-	-	-	-	-	-
Liver-specific A compartments	1	119660000	119680000	1.5106	-0.846917	2.35752	-	-	-	-	-	-
Liver-specific A compartments	1	119680000	119700000	1.86817	-0.372849	2.24102	-	-	-	-	-	-
Liver-specific A compartments	1	120160000	120180000	0.683844	-0.271933	0.955777	ENSSSCG00000039810	Unknown	0	0	-	-
Liver-specific A compartments	1	120180000	120200000	0.557897	-0.607494	1.16539	-	-	-	-	-	-
Liver-specific A compartments	1	120200000	120220000	0.482384	-0.733287	1.21567	-	-	-	-	-	-
Liver-specific A compartments	1	120980000	121000000	1.5826	-0.265231	1.84783	-	-	-	-	-	-
Liver-specific A compartments	1	121000000	121020000	1.48218	-0.856095	2.33827	-	-	-	-	-	-
Liver-specific A compartments	1	121020000	121040000	1.62993	-0.639507	2.26944	-	-	-	-	-	-
Liver-specific A compartments	1	121480000	121500000	1.61914	-0.235274	1.85441	-	-	-	-	-	-
Liver-specific A compartments	1	121500000	121520000	1.37523	-0.378358	1.75359	ENSSSCG00000004644	HDC	4.8	0.3	4.17537	4.54786e-19
Liver-specific A compartments	1	121520000	121540000	1.39755	-0.626488	2.02404	-	-	-	-	-	-
Liver-specific A compartments	1	121540000	121560000	1.20005	-1.39655	2.5966	-	-	-	-	-	-
Liver-specific A compartments	1	121560000	121580000	1.08539	-1.32015	2.40554	ENSSSCG00000004643	SLC27A2	45.12	0.76	5.64147	2.52495e-86
Liver-specific A compartments	1	121580000	121600000	0.792228	-1.06513	1.85735	-	-	-	-	-	-
Liver-specific A compartments	1	122480000	122500000	0.503658	-0.411702	0.91536	-	-	-	-	-	-
Liver-specific A compartments	1	126100000	126120000	1.11161	-0.190565	1.30218	-	-	-	-	-	-
Liver-specific A compartments	1	131800000	131820000	1.67783	-0.36019	2.03802	-	-	-	-	-	-
Liver-specific A compartments	1	131840000	131860000	1.70626	-0.433303	2.13956	-	-	-	-	-	-
Liver-specific A compartments	1	131860000	131880000	1.63733	-0.605683	2.24301	-	-	-	-	-	-
Liver-specific A compartments	1	131880000	131900000	1.572	-0.524625	2.09663	-	-	-	-	-	-
Liver-specific A compartments	1	131900000	131920000	1.66399	-0.862053	2.52604	-	-	-	-	-	-
Liver-specific A compartments	1	131920000	131940000	1.32098	-0.894485	2.21547	-	-	-	-	-	-
Liver-specific A compartments	1	131940000	131960000	1.47416	-0.860575	2.33474	-	-	-	-	-	-
Liver-specific A compartments	1	131960000	131980000	1.46105	-0.652581	2.11363	-	-	-	-	-	-
Liver-specific A compartments	1	131980000	132000000	1.53183	-0.674512	2.20635	-	-	-	-	-	-
Liver-specific A compartments	1	132000000	132020000	1.61237	-0.4058	2.01817	-	-	-	-	-	-
Liver-specific A compartments	1	132040000	132060000	1.53022	-0.485398	2.01562	-	-	-	-	-	-
Liver-specific A compartments	1	132060000	132080000	1.58004	-0.553588	2.13362	-	-	-	-	-	-
Liver-specific A compartments	1	132080000	132100000	1.47793	-0.666458	2.14439	-	-	-	-	-	-
Liver-specific A compartments	1	132100000	132120000	1.36001	-0.503008	1.86301	-	-	-	-	-	-
Liver-specific A compartments	1	132120000	132140000	1.16962	-0.340584	1.51021	-	-	-	-	-	-
Liver-specific A compartments	1	132140000	132160000	1.24546	-0.29878	1.54424	-	-	-	-	-	-
Liver-specific A compartments	1	132180000	132200000	1.21224	-0.39491	1.60715	-	-	-	-	-	-
Liver-specific A compartments	1	132200000	132220000	1.3377	-0.235446	1.57315	-	-	-	-	-	-
Liver-specific A compartments	1	132220000	132240000	1.27676	-0.411807	1.68856	-	-	-	-	-	-
Liver-specific A compartments	1	132240000	132260000	1.24804	-0.285184	1.53322	-	-	-	-	-	-
Liver-specific A compartments	1	132320000	132340000	0.752951	-0.36553	1.11848	-	-	-	-	-	-
Liver-specific A compartments	1	132340000	132360000	0.507857	-0.707192	1.21505	-	-	-	-	-	-
Liver-specific A compartments	1	132360000	132380000	0.562313	-0.602394	1.16471	-	-	-	-	-	-
Liver-specific A compartments	1	132380000	132400000	0.76116	-0.53988	1.30104	-	-	-	-	-	-
Liver-specific A compartments	1	132400000	132420000	0.929389	-0.392874	1.32226	-	-	-	-	-	-
Liver-specific A compartments	1	132600000	132620000	1.26544	-0.114513	1.37996	-	-	-	-	-	-
Liver-specific A compartments	1	132620000	132640000	1.22731	-0.362082	1.58939	-	-	-	-	-	-
Liver-specific A compartments	1	132640000	132660000	1.13008	-0.366051	1.49613	-	-	-	-	-	-
Liver-specific A compartments	1	132660000	132680000	1.31484	-0.112278	1.42711	-	-	-	-	-	-
Liver-specific A compartments	1	132680000	132700000	1.16947	-0.173371	1.34284	-	-	-	-	-	-
Liver-specific A compartments	1	132700000	132720000	1.28456	-0.177325	1.46189	ENSSSCG00000004791	RASGRP1	5.23	258.97	-5.57812	9.0128e-81
Liver-specific A compartments	1	132720000	132740000	1.29032	-0.380682	1.671	-	-	-	-	-	-
Liver-specific A compartments	1	137320000	137340000	1.78986	-0.327209	2.11707	-	-	-	-	-	-
Liver-specific A compartments	1	139860000	139880000	0.858359	-0.330513	1.18887	-	-	-	-	-	-
Liver-specific A compartments	1	139880000	139900000	0.407574	-0.778651	1.18622	-	-	-	-	-	-
Liver-specific A compartments	1	147320000	147340000	0.285292	-0.484769	0.770061	-	-	-	-	-	-
Liver-specific A compartments	1	147340000	147360000	0.297896	-0.38074	0.678636	-	-	-	-	-	-
Liver-specific A compartments	1	147360000	147380000	0.415704	-0.489372	0.905076	-	-	-	-	-	-
Liver-specific A compartments	1	147380000	147400000	0.456118	-0.487786	0.943904	-	-	-	-	-	-
Liver-specific A compartments	1	147400000	147420000	0.572963	-0.521683	1.09465	-	-	-	-	-	-
Liver-specific A compartments	1	147420000	147440000	0.714217	-0.311605	1.02582	-	-	-	-	-	-
Liver-specific A compartments	1	148540000	148560000	0.501553	-0.179708	0.681261	-	-	-	-	-	-
Liver-specific A compartments	1	158160000	158180000	0.544304	-0.564973	1.10928	-	-	-	-	-	-
Liver-specific A compartments	1	158180000	158200000	0.760912	-0.768503	1.52942	ENSSSCG00000004894	SERPINB5	0.48	0.38	-	-
Liver-specific A compartments	1	158200000	158220000	1.19141	-0.402063	1.59347	-	-	-	-	-	-
Liver-specific A compartments	1	159420000	159440000	0.623418	-0.354875	0.978294	-	-	-	-	-	-
Liver-specific A compartments	1	159440000	159460000	0.591053	-0.621047	1.2121	-	-	-	-	-	-
Liver-specific A compartments	1	159460000	159480000	0.570706	-0.849482	1.42019	-	-	-	-	-	-
Liver-specific A compartments	1	159480000	159500000	0.544799	-0.914882	1.45968	-	-	-	-	-	-
Liver-specific A compartments	1	159500000	159520000	0.879465	-0.485328	1.36479	-	-	-	-	-	-
Liver-specific A compartments	1	159580000	159600000	1.37606	-0.382243	1.75831	-	-	-	-	-	-
Liver-specific A compartments	1	159600000	159620000	1.1619	-0.578742	1.74064	-	-	-	-	-	-
Liver-specific A compartments	1	159620000	159640000	1.33087	-0.437523	1.7684	-	-	-	-	-	-
Liver-specific A compartments	1	159640000	159660000	1.42261	-0.582557	2.00517	-	-	-	-	-	-
Liver-specific A compartments	1	159680000	159700000	1.3154	-0.527304	1.84271	-	-	-	-	-	-
Liver-specific A compartments	1	159700000	159720000	1.19863	-0.726514	1.92515	-	-	-	-	-	-
Liver-specific A compartments	1	159720000	159740000	1.36745	-0.852076	2.21952	-	-	-	-	-	-
Liver-specific A compartments	1	159740000	159760000	0.985608	-0.60851	1.59412	-	-	-	-	-	-
Liver-specific A compartments	1	159760000	159780000	0.662371	-0.50222	1.16459	-	-	-	-	-	-
Liver-specific A compartments	1	161480000	161500000	0.538324	-1.31912	1.85744	-	-	-	-	-	-
Liver-specific A compartments	1	161500000	161520000	0.570008	-1.25157	1.82158	-	-	-	-	-	-
Liver-specific A compartments	1	161520000	161540000	0.824224	-0.715462	1.53969	-	-	-	-	-	-
Liver-specific A compartments	1	161660000	161680000	1.47318	-0.250531	1.72371	ENSSSCG00000004910	RAX	0.01	0	-	-
Liver-specific A compartments	1	179420000	179440000	1.37205	-0.578259	1.95031	-	-	-	-	-	-
Liver-specific A compartments	1	181900000	181920000	1.504	-0.165117	1.66912	-	-	-	-	-	-
Liver-specific A compartments	1	182040000	182060000	2.07205	-0.183208	2.25526	-	-	-	-	-	-
Liver-specific A compartments	1	182060000	182080000	2.13493	-0.314921	2.44985	-	-	-	-	-	-
Liver-specific A compartments	1	182080000	182100000	2.0557	-0.258631	2.31434	-	-	-	-	-	-
Liver-specific A compartments	1	182780000	182800000	1.76485	-0.269685	2.03453	-	-	-	-	-	-
Liver-specific A compartments	1	182800000	182820000	1.53065	-0.348877	1.87953	-	-	-	-	-	-
Liver-specific A compartments	1	182860000	182880000	0.696869	-0.693681	1.39055	-	-	-	-	-	-
Liver-specific A compartments	1	182880000	182900000	0.617783	-0.842669	1.46045	-	-	-	-	-	-
Liver-specific A compartments	1	182900000	182920000	0.627966	-1.15068	1.77865	-	-	-	-	-	-
Liver-specific A compartments	1	182920000	182940000	0.557218	-1.29239	1.84961	-	-	-	-	-	-
Liver-specific A compartments	1	182940000	182960000	0.525779	-1.50202	2.0278	-	-	-	-	-	-
Liver-specific A compartments	1	182960000	182980000	0.50333	-1.72374	2.22707	-	-	-	-	-	-
Liver-specific A compartments	1	182980000	183000000	0.539673	-1.69246	2.23213	-	-	-	-	-	-
Liver-specific A compartments	1	183000000	183020000	0.59443	-1.63031	2.22474	-	-	-	-	-	-
Liver-specific A compartments	1	183020000	183040000	0.65182	-1.10895	1.76077	-	-	-	-	-	-
Liver-specific A compartments	1	183040000	183060000	0.690979	-0.762483	1.45346	-	-	-	-	-	-
Liver-specific A compartments	1	183060000	183080000	0.578698	-1.33076	1.90946	-	-	-	-	-	-
Liver-specific A compartments	1	183080000	183100000	0.581087	-1.44063	2.02171	-	-	-	-	-	-
Liver-specific A compartments	1	183100000	183120000	0.516602	-1.55162	2.06822	-	-	-	-	-	-
Liver-specific A compartments	1	183120000	183140000	0.407175	-1.35063	1.75781	-	-	-	-	-	-
Liver-specific A compartments	1	183140000	183160000	0.309552	-1.64367	1.95322	-	-	-	-	-	-
Liver-specific A compartments	1	183200000	183220000	0.374379	-1.63018	2.00455	-	-	-	-	-	-
Liver-specific A compartments	1	183220000	183240000	0.408182	-1.54843	1.95661	-	-	-	-	-	-
Liver-specific A compartments	1	183240000	183260000	0.336045	-1.55262	1.88867	-	-	-	-	-	-
Liver-specific A compartments	1	183260000	183280000	0.368294	-1.58391	1.9522	-	-	-	-	-	-
Liver-specific A compartments	1	183280000	183300000	0.589366	-1.45851	2.04788	-	-	-	-	-	-
Liver-specific A compartments	1	183300000	183320000	0.658399	-1.3226	1.981	-	-	-	-	-	-
Liver-specific A compartments	1	183320000	183340000	0.848146	-1.18763	2.03578	-	-	-	-	-	-
Liver-specific A compartments	1	183340000	183360000	1.25104	-0.744659	1.9957	-	-	-	-	-	-
Liver-specific A compartments	1	183360000	183380000	1.39769	-0.455057	1.85275	-	-	-	-	-	-
Liver-specific A compartments	1	183380000	183400000	1.26367	-0.374198	1.63787	-	-	-	-	-	-
Liver-specific A compartments	1	183440000	183460000	1.22285	-0.66776	1.89061	-	-	-	-	-	-
Liver-specific A compartments	1	183460000	183480000	1.04148	-1.07959	2.12107	-	-	-	-	-	-
Liver-specific A compartments	1	183480000	183500000	0.885521	-1.1362	2.02172	-	-	-	-	-	-
Liver-specific A compartments	1	183500000	183520000	0.843458	-1.27338	2.11684	-	-	-	-	-	-
Liver-specific A compartments	1	183520000	183540000	0.775173	-1.12653	1.9017	-	-	-	-	-	-
Liver-specific A compartments	1	183540000	183560000	0.933721	-0.963182	1.8969	-	-	-	-	-	-
Liver-specific A compartments	1	183560000	183580000	1.11216	-0.629652	1.74182	-	-	-	-	-	-
Liver-specific A compartments	1	183580000	183600000	1.12919	-0.470685	1.59988	-	-	-	-	-	-
Liver-specific A compartments	1	183600000	183620000	1.29107	-0.264274	1.55534	-	-	-	-	-	-
Liver-specific A compartments	1	183620000	183640000	1.42864	-0.266058	1.6947	-	-	-	-	-	-
Liver-specific A compartments	1	183640000	183660000	1.68339	-0.568527	2.25192	-	-	-	-	-	-
Liver-specific A compartments	1	183660000	183680000	1.67378	-0.507718	2.1815	-	-	-	-	-	-
Liver-specific A compartments	1	183680000	183700000	1.79718	-0.611419	2.4086	-	-	-	-	-	-
Liver-specific A compartments	1	183700000	183720000	2.14286	-0.53512	2.67798	-	-	-	-	-	-
Liver-specific A compartments	1	185580000	185600000	1.26111	-0.418698	1.6798	-	-	-	-	-	-
Liver-specific A compartments	1	185600000	185620000	1.24247	-0.470459	1.71292	-	-	-	-	-	-
Liver-specific A compartments	1	185620000	185640000	1.33191	-0.513192	1.84511	-	-	-	-	-	-
Liver-specific A compartments	1	185640000	185660000	1.52333	-0.368614	1.89194	-	-	-	-	-	-
Liver-specific A compartments	1	185660000	185680000	1.59284	-0.080602	1.67344	-	-	-	-	-	-
Liver-specific A compartments	1	185900000	185920000	0.366899	-0.769581	1.13648	-	-	-	-	-	-
Liver-specific A compartments	1	186580000	186600000	0.405576	-0.858519	1.2641	-	-	-	-	-	-
Liver-specific A compartments	1	189740000	189760000	0.402187	-0.169004	0.571191	-	-	-	-	-	-
Liver-specific A compartments	1	190220000	190240000	1.81258	-0.390861	2.20344	-	-	-	-	-	-
Liver-specific A compartments	1	190240000	190260000	1.77279	-0.372968	2.14576	-	-	-	-	-	-
Liver-specific A compartments	1	190260000	190280000	1.68512	-0.351804	2.03693	-	-	-	-	-	-
Liver-specific A compartments	1	190280000	190300000	1.84697	-0.398322	2.24529	-	-	-	-	-	-
Liver-specific A compartments	1	190760000	190780000	0.827868	-0.602773	1.43064	-	-	-	-	-	-
Liver-specific A compartments	1	190780000	190800000	0.702544	-0.587264	1.28981	-	-	-	-	-	-
Liver-specific A compartments	1	190800000	190820000	0.517775	-0.976647	1.49442	-	-	-	-	-	-
Liver-specific A compartments	1	194060000	194080000	0.891853	-0.325396	1.21725	-	-	-	-	-	-
Liver-specific A compartments	1	194100000	194120000	0.745344	-0.212289	0.957633	-	-	-	-	-	-
Liver-specific A compartments	1	196000000	196020000	0.474119	-1.24191	1.71603	-	-	-	-	-	-
Liver-specific A compartments	1	196020000	196040000	0.854531	-0.723632	1.57816	-	-	-	-	-	-
Liver-specific A compartments	1	196040000	196060000	0.963025	-0.490641	1.45367	ENSSSCG00000005122	TEK	142.35	11.28	3.60892	2.35743e-34
Liver-specific A compartments	1	196060000	196080000	0.897492	-0.843314	1.74081	-	-	-	-	-	-
Liver-specific A compartments	1	196080000	196100000	1.10444	-0.672227	1.77667	-	-	-	-	-	-
Liver-specific A compartments	1	201460000	201480000	0.998231	-0.550016	1.54825	-	-	-	-	-	-
Liver-specific A compartments	1	201640000	201660000	0.99516	-0.659113	1.65427	ENSSSCG00000005152	IFN-DELTA-1	0.87	1.07	-0.175493	0.789117
Liver-specific A compartments	1	206120000	206140000	0.396947	-0.31304	0.709987	-	-	-	-	-	-
Liver-specific A compartments	1	206140000	206160000	0.455438	-0.305456	0.760894	-	-	-	-	-	-
Liver-specific A compartments	1	206180000	206200000	0.3137	-0.350755	0.664456	-	-	-	-	-	-
Liver-specific A compartments	1	207280000	207300000	0.864701	-0.786025	1.65073	-	-	-	-	-	-
Liver-specific A compartments	1	207300000	207320000	0.867236	-0.846427	1.71366	-	-	-	-	-	-
Liver-specific A compartments	1	207320000	207340000	1.01056	-0.425417	1.43598	-	-	-	-	-	-
Liver-specific A compartments	1	207380000	207400000	1.07314	-0.329003	1.40214	-	-	-	-	-	-
Liver-specific A compartments	1	207400000	207420000	0.72031	-0.459336	1.17965	-	-	-	-	-	-
Liver-specific A compartments	1	215180000	215200000	0.497768	-0.315034	0.812802	-	-	-	-	-	-
Liver-specific A compartments	1	215200000	215220000	0.559969	-0.520019	1.07999	-	-	-	-	-	-
Liver-specific A compartments	1	215220000	215240000	0.629176	-0.475232	1.10441	-	-	-	-	-	-
Liver-specific A compartments	1	215240000	215260000	0.681685	-0.562295	1.24398	-	-	-	-	-	-
Liver-specific A compartments	1	215260000	215280000	0.691269	-0.57631	1.26758	-	-	-	-	-	-
Liver-specific A compartments	1	215280000	215300000	0.679655	-0.568325	1.24798	-	-	-	-	-	-
Liver-specific A compartments	1	215300000	215320000	0.702341	-0.48499	1.18733	-	-	-	-	-	-
Liver-specific A compartments	1	215320000	215340000	0.741237	-0.430234	1.17147	-	-	-	-	-	-
Liver-specific A compartments	1	215340000	215360000	0.677311	-0.703949	1.38126	-	-	-	-	-	-
Liver-specific A compartments	1	215360000	215380000	0.7437	-0.634395	1.37809	-	-	-	-	-	-
Liver-specific A compartments	1	215380000	215400000	0.679838	-0.705101	1.38494	-	-	-	-	-	-
Liver-specific A compartments	1	215400000	215420000	0.692784	-0.413015	1.1058	-	-	-	-	-	-
Liver-specific A compartments	1	215420000	215440000	0.818185	-0.498068	1.31625	-	-	-	-	-	-
Liver-specific A compartments	1	215440000	215460000	1.07852	-0.379763	1.45828	-	-	-	-	-	-
Liver-specific A compartments	1	215520000	215540000	1.78446	-0.503075	2.28754	ENSSSCG00000047663	Unknown	2.71	13.03	-2.19578	1.15083e-34
Liver-specific A compartments	1	215540000	215560000	1.69177	-0.496097	2.18786	-	-	-	-	-	-
Liver-specific A compartments	1	215580000	215600000	2.07428	-0.269899	2.34418	-	-	-	-	-	-
Liver-specific A compartments	1	215600000	215620000	2.07793	-0.218197	2.29613	ENSSSCG00000005199	GLDC	178.5	18.79	3.19094	3.55095e-51
Liver-specific A compartments	1	215640000	215660000	1.86627	-0.289233	2.15551	-	-	-	-	-	-
Liver-specific A compartments	1	215660000	215680000	1.94075	-0.318406	2.25916	-	-	-	-	-	-
Liver-specific A compartments	1	215840000	215860000	1.90342	-0.495448	2.39887	ENSSSCG00000021136	TPD52L3	0.44	0	-	-
Liver-specific A compartments	1	215860000	215880000	1.88469	-1.08175	2.96644	-	-	-	-	-	-
Liver-specific A compartments	1	215880000	215900000	1.91168	-1.30067	3.21235	-	-	-	-	-	-
Liver-specific A compartments	1	215900000	215920000	1.91417	-1.4864	3.40057	-	-	-	-	-	-
Liver-specific A compartments	1	215920000	215940000	1.8912	-1.27751	3.16871	-	-	-	-	-	-
Liver-specific A compartments	1	215940000	215960000	1.68345	-1.4444	3.12786	ENSSSCG00000005203	IL33	102.07	11.05	3.23599	1.6822e-23
Liver-specific A compartments	1	215960000	215980000	1.58049	-1.92178	3.50227	-	-	-	-	-	-
Liver-specific A compartments	1	215980000	216000000	1.45612	-2.10604	3.56216	-	-	-	-	-	-
Liver-specific A compartments	1	216000000	216020000	1.34459	-2.11248	3.45707	-	-	-	-	-	-
Liver-specific A compartments	1	216020000	216040000	1.43276	-2.02615	3.45892	-	-	-	-	-	-
Liver-specific A compartments	1	216040000	216060000	1.60138	-1.74153	3.34291	-	-	-	-	-	-
Liver-specific A compartments	1	216060000	216080000	1.87826	-0.99072	2.86898	-	-	-	-	-	-
Liver-specific A compartments	1	216220000	216240000	2.62985	-0.208645	2.8385	-	-	-	-	-	-
Liver-specific A compartments	1	216240000	216260000	2.36978	-0.601692	2.97147	ENSSSCG00000005206	MLANA	0	0	-	-
Liver-specific A compartments	1	216260000	216280000	2.4522	-0.656615	3.10882	-	-	-	-	-	-
Liver-specific A compartments	1	216280000	216300000	2.72358	-0.332358	3.05594	-	-	-	-	-	-
Liver-specific A compartments	1	216520000	216540000	2.53386	-0.398909	2.93277	ENSSSCG00000005209	Unknown	0.41	0	-	-
Liver-specific A compartments	1	216540000	216560000	2.74194	-0.382113	3.12405	-	-	-	-	-	-
Liver-specific A compartments	1	216560000	216580000	2.39564	-0.835721	3.23136	-	-	-	-	-	-
Liver-specific A compartments	1	216580000	216600000	2.46619	-1.20726	3.67345	-	-	-	-	-	-
Liver-specific A compartments	1	216600000	216620000	2.10401	-1.168	3.27201	-	-	-	-	-	-
Liver-specific A compartments	1	216620000	216640000	2.16927	-1.02519	3.19447	-	-	-	-	-	-
Liver-specific A compartments	1	216640000	216660000	2.18285	-0.900469	3.08332	-	-	-	-	-	-
Liver-specific A compartments	1	216740000	216760000	2.37257	-0.675385	3.04795	-	-	-	-	-	-
Liver-specific A compartments	1	216760000	216780000	2.22901	-0.610372	2.83938	ENSSSCG00000005216	RLN1	0.29	0.65	-1.16421	0.35463
Liver-specific A compartments	1	216780000	216800000	2.24315	-0.302976	2.54612	ENSSSCG00000005211;ENSSSCG00000005214	CD274;INSL6	1.05;1.14	1.74;2.45	-0.570922437806642;-1.09722646608248	0.0727855275900488;0.000604626016994138
Liver-specific A compartments	1	216800000	216820000	2.31954	-0.77876	3.0983	-	-	-	-	-	-
Liver-specific A compartments	1	216820000	216840000	2.46815	-0.894925	3.36307	-	-	-	-	-	-
Liver-specific A compartments	1	216840000	216860000	2.892	-0.430437	3.32244	-	-	-	-	-	-
Liver-specific A compartments	1	217020000	217040000	3.49868	-0.339935	3.83862	ENSSSCG00000049203	Unknown	2.25	3.58	-0.565525	0.0682912
Liver-specific A compartments	1	217040000	217060000	3.33323	-0.454748	3.78798	-	-	-	-	-	-
Liver-specific A compartments	1	217060000	217080000	3.34769	-0.554422	3.90211	-	-	-	-	-	-
Liver-specific A compartments	1	217080000	217100000	3.44306	-0.78457	4.22763	-	-	-	-	-	-
Liver-specific A compartments	1	217100000	217120000	3.72354	-0.75381	4.47735	-	-	-	-	-	-
Liver-specific A compartments	1	217120000	217140000	3.64092	-0.398689	4.03961	-	-	-	-	-	-
Liver-specific A compartments	1	217340000	217360000	2.18251	-0.151511	2.33402	-	-	-	-	-	-
Liver-specific A compartments	1	217360000	217380000	1.95614	-0.525653	2.48179	-	-	-	-	-	-
Liver-specific A compartments	1	217380000	217400000	1.50512	-0.798359	2.30348	-	-	-	-	-	-
Liver-specific A compartments	1	217400000	217420000	1.28971	-0.950848	2.24056	-	-	-	-	-	-
Liver-specific A compartments	1	217420000	217440000	1.0751	-0.979315	2.05442	-	-	-	-	-	-
Liver-specific A compartments	1	217440000	217460000	0.861986	-1.18555	2.04754	ENSSSCG00000005222	SLC1A1	13.96	84.91	-2.38134	1.13118e-19
Liver-specific A compartments	1	217460000	217480000	0.697769	-1.19742	1.89519	-	-	-	-	-	-
Liver-specific A compartments	1	217480000	217500000	0.818672	-1.19499	2.01366	-	-	-	-	-	-
Liver-specific A compartments	1	217500000	217520000	0.725708	-1.12404	1.84974	-	-	-	-	-	-
Liver-specific A compartments	1	217520000	217540000	0.746125	-0.802387	1.54851	-	-	-	-	-	-
Liver-specific A compartments	1	217540000	217560000	0.990557	-0.296286	1.28684	-	-	-	-	-	-
Liver-specific A compartments	1	217560000	217580000	0.912157	-0.487052	1.39921	-	-	-	-	-	-
Liver-specific A compartments	1	217580000	217600000	0.866839	-0.375161	1.242	-	-	-	-	-	-
Liver-specific A compartments	1	217600000	217620000	0.907187	-0.268596	1.17578	-	-	-	-	-	-
Liver-specific A compartments	1	217640000	217660000	0.709441	-0.353657	1.0631	-	-	-	-	-	-
Liver-specific A compartments	1	217660000	217680000	0.552195	-0.499646	1.05184	-	-	-	-	-	-
Liver-specific A compartments	1	217680000	217700000	0.458926	-0.354383	0.813309	-	-	-	-	-	-
Liver-specific A compartments	1	217700000	217720000	0.423478	-0.332818	0.756295	-	-	-	-	-	-
Liver-specific A compartments	1	217720000	217740000	0.368622	-0.500156	0.868778	-	-	-	-	-	-
Liver-specific A compartments	1	217740000	217760000	0.328417	-0.626056	0.954474	-	-	-	-	-	-
Liver-specific A compartments	1	217780000	217800000	0.435106	-0.687982	1.12309	-	-	-	-	-	-
Liver-specific A compartments	1	217800000	217820000	0.243029	-0.617713	0.860741	-	-	-	-	-	-
Liver-specific A compartments	1	217920000	217940000	0.2363	-0.578896	0.815195	-	-	-	-	-	-
Liver-specific A compartments	1	217960000	217980000	0.293477	-0.27714	0.570616	-	-	-	-	-	-
Liver-specific A compartments	1	218000000	218020000	0.395665	-0.454782	0.850447	-	-	-	-	-	-
Liver-specific A compartments	1	218020000	218040000	0.559764	-0.376708	0.936472	-	-	-	-	-	-
Liver-specific A compartments	1	218040000	218060000	0.332772	-0.596359	0.929131	-	-	-	-	-	-
Liver-specific A compartments	1	218060000	218080000	0.422948	-0.328321	0.751269	-	-	-	-	-	-
Liver-specific A compartments	1	218080000	218100000	0.299592	-0.474337	0.773929	-	-	-	-	-	-
Liver-specific A compartments	1	218120000	218140000	0.406471	-0.37328	0.779752	-	-	-	-	-	-
Liver-specific A compartments	1	219060000	219080000	0.292142	-0.510475	0.802617	-	-	-	-	-	-
Liver-specific A compartments	1	219100000	219120000	0.406967	-0.349095	0.756062	ENSSSCG00000005228	KCNV2	0.03	0.25	-	-
Liver-specific A compartments	1	221240000	221260000	1.92146	-0.354828	2.27629	-	-	-	-	-	-
Liver-specific A compartments	1	221280000	221300000	2.16537	-0.35606	2.52143	-	-	-	-	-	-
Liver-specific A compartments	1	221300000	221320000	2.12929	-0.200447	2.32974	-	-	-	-	-	-
Liver-specific A compartments	1	221380000	221400000	1.90762	-0.488379	2.396	-	-	-	-	-	-
Liver-specific A compartments	1	221400000	221420000	2.02694	-0.51484	2.54178	-	-	-	-	-	-
Liver-specific A compartments	1	221420000	221440000	2.29132	-0.859356	3.15068	-	-	-	-	-	-
Liver-specific A compartments	1	221440000	221460000	2.52105	-0.859664	3.38071	-	-	-	-	-	-
Liver-specific A compartments	1	221460000	221480000	2.39043	-0.75033	3.14076	-	-	-	-	-	-
Liver-specific A compartments	1	221480000	221500000	2.56838	-0.463822	3.0322	ENSSSCG00000005240	DOCK8	26.26	10.41	1.4943	1.27972e-08
Liver-specific A compartments	1	221580000	221600000	0.384819	-0.120796	0.505615	-	-	-	-	-	-
Liver-specific A compartments	1	222380000	222400000	0.692978	-0.21874	0.911717	-	-	-	-	-	-
Liver-specific A compartments	1	223480000	223500000	0.52978	-0.495592	1.02537	-	-	-	-	-	-
Liver-specific A compartments	1	223500000	223520000	0.894863	-0.17207	1.06693	-	-	-	-	-	-
Liver-specific A compartments	1	225740000	225760000	1.38213	-0.250067	1.63219	-	-	-	-	-	-
Liver-specific A compartments	1	228220000	228240000	0.652518	-0.179569	0.832087	-	-	-	-	-	-
Liver-specific A compartments	1	229300000	229320000	0.323958	-0.53237	0.856328	-	-	-	-	-	-
Liver-specific A compartments	1	229340000	229360000	0.489124	-0.199437	0.688562	-	-	-	-	-	-
Liver-specific A compartments	1	229420000	229440000	0.470321	-0.214371	0.684692	ENSSSCG00000005277	GCNT1	8.62	3.09	1.48037	3.12317e-06
Liver-specific A compartments	1	229440000	229460000	0.398333	-0.224749	0.623082	-	-	-	-	-	-
Liver-specific A compartments	1	229460000	229480000	0.406799	-0.331664	0.738463	-	-	-	-	-	-
Liver-specific A compartments	1	229540000	229560000	0.651713	-0.326311	0.978023	-	-	-	-	-	-
Liver-specific A compartments	1	230040000	230060000	0.670744	-0.22187	0.892614	-	-	-	-	-	-
Liver-specific A compartments	1	230100000	230120000	1.16237	-0.274262	1.43663	-	-	-	-	-	-
Liver-specific A compartments	1	230120000	230140000	1.03795	-0.53906	1.57701	-	-	-	-	-	-
Liver-specific A compartments	1	230140000	230160000	1.03824	-0.557325	1.59557	-	-	-	-	-	-
Liver-specific A compartments	1	230160000	230180000	0.833206	-0.637763	1.47097	-	-	-	-	-	-
Liver-specific A compartments	1	230180000	230200000	1.0291	-0.670304	1.6994	-	-	-	-	-	-
Liver-specific A compartments	1	230200000	230220000	0.891846	-0.633595	1.52544	-	-	-	-	-	-
Liver-specific A compartments	1	230220000	230240000	0.906646	-0.768048	1.67469	-	-	-	-	-	-
Liver-specific A compartments	1	230240000	230260000	0.91762	-0.75272	1.67034	-	-	-	-	-	-
Liver-specific A compartments	1	230260000	230280000	0.975897	-0.654452	1.63035	-	-	-	-	-	-
Liver-specific A compartments	1	230280000	230300000	0.999747	-0.677246	1.67699	-	-	-	-	-	-
Liver-specific A compartments	1	230300000	230320000	1.2029	-0.375645	1.57855	-	-	-	-	-	-
Liver-specific A compartments	1	230320000	230340000	1.26488	-0.250617	1.5155	-	-	-	-	-	-
Liver-specific A compartments	1	230380000	230400000	1.3178	-0.307076	1.62487	-	-	-	-	-	-
Liver-specific A compartments	1	230400000	230420000	1.43957	-0.425118	1.86469	-	-	-	-	-	-
Liver-specific A compartments	1	230420000	230440000	1.3216	-0.568232	1.88984	ENSSSCG00000050902	Unknown	1.12	3.91	-1.62908	0.00108772
Liver-specific A compartments	1	230440000	230460000	1.45215	-0.627728	2.07988	-	-	-	-	-	-
Liver-specific A compartments	1	230460000	230480000	1.44207	-0.365821	1.80789	-	-	-	-	-	-
Liver-specific A compartments	1	230480000	230500000	1.64294	-0.269885	1.91283	-	-	-	-	-	-
Liver-specific A compartments	1	230500000	230520000	1.54598	-0.184796	1.73078	-	-	-	-	-	-
Liver-specific A compartments	1	231000000	231020000	0.50004	-0.165424	0.665463	-	-	-	-	-	-
Liver-specific A compartments	1	231020000	231040000	0.573945	-0.240321	0.814266	-	-	-	-	-	-
Liver-specific A compartments	1	231160000	231180000	0.580713	-0.255286	0.835999	-	-	-	-	-	-
Liver-specific A compartments	1	234220000	234240000	0.573362	-0.103441	0.676804	-	-	-	-	-	-
Liver-specific A compartments	1	234400000	234420000	0.540803	-0.22465	0.765452	-	-	-	-	-	-
Liver-specific A compartments	1	234420000	234440000	0.36196	-0.321479	0.683439	-	-	-	-	-	-
Liver-specific A compartments	1	234460000	234480000	0.36045	-0.160229	0.520679	-	-	-	-	-	-
Liver-specific A compartments	1	241700000	241720000	0.941685	-0.249268	1.19095	-	-	-	-	-	-
Liver-specific A compartments	1	241720000	241740000	0.833271	-0.357038	1.19031	-	-	-	-	-	-
Liver-specific A compartments	1	243120000	243140000	0.93075	-0.661531	1.59228	-	-	-	-	-	-
Liver-specific A compartments	1	243140000	243160000	0.607134	-0.406675	1.01381	ENSSSCG00000038300	ALDOB	9950.2	0.79	13.5491	3.48985e-113
Liver-specific A compartments	1	243160000	243180000	0.456897	-0.447619	0.904515	-	-	-	-	-	-
Liver-specific A compartments	1	243200000	243220000	0.441165	-0.461196	0.902361	-	-	-	-	-	-
Liver-specific A compartments	1	248360000	248380000	0.373023	-0.18123	0.554252	-	-	-	-	-	-
Liver-specific A compartments	1	248380000	248400000	0.538479	-0.224958	0.763437	-	-	-	-	-	-
Liver-specific A compartments	1	248540000	248560000	0.35254	-0.429258	0.781798	-	-	-	-	-	-
Liver-specific A compartments	1	248640000	248660000	1.20666	-0.402774	1.60944	-	-	-	-	-	-
Liver-specific A compartments	1	248660000	248680000	1.08689	-0.375424	1.46232	-	-	-	-	-	-
Liver-specific A compartments	1	248900000	248920000	0.849939	-0.231435	1.08137	-	-	-	-	-	-
Liver-specific A compartments	1	248920000	248940000	0.620774	-0.476427	1.0972	-	-	-	-	-	-
Liver-specific A compartments	1	248940000	248960000	0.534634	-0.32849	0.863125	-	-	-	-	-	-
Liver-specific A compartments	1	248960000	248980000	0.557458	-0.317114	0.874572	-	-	-	-	-	-
Liver-specific A compartments	1	249000000	249020000	0.358424	-0.411339	0.769763	-	-	-	-	-	-
Liver-specific A compartments	1	249020000	249040000	0.333362	-0.577782	0.911144	-	-	-	-	-	-
Liver-specific A compartments	1	249040000	249060000	0.200187	-0.601956	0.802143	-	-	-	-	-	-
Liver-specific A compartments	1	249860000	249880000	0.718809	-0.442795	1.1616	-	-	-	-	-	-
Liver-specific A compartments	1	250600000	250620000	0.568728	-0.429055	0.997783	-	-	-	-	-	-
Liver-specific A compartments	1	250780000	250800000	0.518573	-0.781389	1.29996	-	-	-	-	-	-
Liver-specific A compartments	1	250800000	250820000	0.446582	-0.668085	1.11467	-	-	-	-	-	-
Liver-specific A compartments	1	250820000	250840000	1.05582	-0.393019	1.44884	-	-	-	-	-	-
Liver-specific A compartments	1	250840000	250860000	0.948976	-0.520789	1.46976	-	-	-	-	-	-
Liver-specific A compartments	1	250860000	250880000	0.958865	-0.36631	1.32518	-	-	-	-	-	-
Liver-specific A compartments	1	251300000	251320000	1.29582	-0.261756	1.55757	-	-	-	-	-	-
Liver-specific A compartments	1	251320000	251340000	1.06731	-0.429114	1.49642	-	-	-	-	-	-
Liver-specific A compartments	1	251340000	251360000	0.878606	-0.579297	1.4579	ENSSSCG00000005454	TXNDC8	2.12	1.33	0.886655	0.128539
Liver-specific A compartments	1	260400000	260420000	0.293606	-0.544542	0.838148	-	-	-	-	-	-
Liver-specific A compartments	1	260420000	260440000	0.518469	-0.235912	0.754381	-	-	-	-	-	-
Liver-specific A compartments	2	18540000	18560000	0.87444	-0.207792	1.08223	-	-	-	-	-	-
Liver-specific A compartments	2	18640000	18660000	0.467533	-0.391026	0.858559	-	-	-	-	-	-
Liver-specific A compartments	2	18900000	18920000	0.318318	-0.908774	1.22709	-	-	-	-	-	-
Liver-specific A compartments	2	18920000	18940000	0.295941	-0.96145	1.25739	-	-	-	-	-	-
Liver-specific A compartments	2	27320000	27340000	1.21738	-0.325618	1.543	-	-	-	-	-	-
Liver-specific A compartments	2	27400000	27420000	0.762575	-0.405755	1.16833	-	-	-	-	-	-
Liver-specific A compartments	2	27940000	27960000	1.92638	-0.32855	2.25493	-	-	-	-	-	-
Liver-specific A compartments	2	27980000	28000000	1.42323	-0.450534	1.87376	-	-	-	-	-	-
Liver-specific A compartments	2	28000000	28020000	1.37247	-0.607164	1.97963	-	-	-	-	-	-
Liver-specific A compartments	2	28060000	28080000	0.325066	-1.32599	1.65105	-	-	-	-	-	-
Liver-specific A compartments	2	44480000	44500000	0.961598	-0.288782	1.25038	-	-	-	-	-	-
Liver-specific A compartments	2	44520000	44540000	1.58142	-0.47871	2.06013	-	-	-	-	-	-
Liver-specific A compartments	2	44540000	44560000	1.73301	-0.677562	2.41058	ENSSSCG00000044539	Unknown	0.63	1.19	-0.713356	0.0486947
Liver-specific A compartments	2	44560000	44580000	1.88561	-0.512668	2.39827	-	-	-	-	-	-
Liver-specific A compartments	2	44820000	44840000	0.606243	-0.377035	0.983278	-	-	-	-	-	-
Liver-specific A compartments	2	44840000	44860000	0.605499	-0.462753	1.06825	-	-	-	-	-	-
Liver-specific A compartments	2	44940000	44960000	0.608555	-0.418688	1.02724	-	-	-	-	-	-
Liver-specific A compartments	2	49520000	49540000	0.671032	-0.168583	0.839615	-	-	-	-	-	-
Liver-specific A compartments	2	49540000	49560000	0.640023	-0.308681	0.948704	-	-	-	-	-	-
Liver-specific A compartments	2	49560000	49580000	0.758582	-0.205779	0.96436	-	-	-	-	-	-
Liver-specific A compartments	2	49660000	49680000	0.806733	-0.222813	1.02955	-	-	-	-	-	-
Liver-specific A compartments	2	66400000	66420000	0.935376	-0.884312	1.81969	-	-	-	-	-	-
Liver-specific A compartments	2	66420000	66440000	0.955792	-1.07169	2.02748	-	-	-	-	-	-
Liver-specific A compartments	2	70240000	70260000	1.43057	-1.35424	2.78481	-	-	-	-	-	-
Liver-specific A compartments	2	70260000	70280000	1.00458	-1.37628	2.38086	-	-	-	-	-	-
Liver-specific A compartments	2	70480000	70500000	0.625263	-1.76232	2.38758	-	-	-	-	-	-
Liver-specific A compartments	2	70500000	70520000	0.730247	-1.41039	2.14064	-	-	-	-	-	-
Liver-specific A compartments	2	70520000	70540000	0.736619	-1.07042	1.80704	-	-	-	-	-	-
Liver-specific A compartments	2	70540000	70560000	1.02876	-1.31003	2.33879	ENSSSCG00000013609	Unknown	0.03	1.37	-6.54562	2.08512e-06
Liver-specific A compartments	2	70560000	70580000	1.17311	-1.11599	2.2891	-	-	-	-	-	-
Liver-specific A compartments	2	70620000	70640000	1.60606	-1.00261	2.60867	ENSSSCG00000013606;ENSSSCG00000013607	OR2Z1;Unknown	0;0.03	0;0.01	-;-	-;-
Liver-specific A compartments	2	70640000	70660000	1.43651	-1.3046	2.74111	ENSSSCG00000013605	ACTL9	0.02	0	-	-
Liver-specific A compartments	2	70660000	70680000	1.76013	-0.737771	2.4979	-	-	-	-	-	-
Liver-specific A compartments	2	71960000	71980000	1.93078	-1.62927	3.56004	ENSSSCG00000013559	MBD3L3	0.08	0.09	-	-
Liver-specific A compartments	2	71980000	72000000	1.96468	-1.36158	3.32627	ENSSSCG00000041386	Unknown	0.07	0.17	-	-
Liver-specific A compartments	2	72000000	72020000	1.90196	-1.42132	3.32327	-	-	-	-	-	-
Liver-specific A compartments	2	72020000	72040000	1.65157	-1.76187	3.41344	ENSSSCG00000040926;ENSSSCG00000050658	Unknown;Unknown	0;0.07	0;0.17	-;-	-;-
Liver-specific A compartments	2	72040000	72060000	1.59535	-1.71562	3.31097	ENSSSCG00000044953	MBD3L3	0	0	-	-
Liver-specific A compartments	2	72060000	72080000	1.46979	-1.79947	3.26925	ENSSSCG00000046190	Unknown	0.07	0.17	-	-
Liver-specific A compartments	2	72080000	72100000	1.4621	-1.82533	3.28743	-	-	-	-	-	-
Liver-specific A compartments	2	72100000	72120000	1.6467	-1.79947	3.44618	ENSSSCG00000026402	Unknown	1.42	0.74	1.23636	0.00716928
Liver-specific A compartments	2	72120000	72140000	1.58983	-1.64858	3.2384	-	-	-	-	-	-
Liver-specific A compartments	2	72140000	72160000	1.72614	-1.48255	3.20869	ENSSSCG00000050480;ENSSSCG00000050577	Unknown;Unknown	0.29;3.64	3.12;10.82	-3.66047722354767;-1.44104484203632	0.0103253760050996;0.000216160758090676
Liver-specific A compartments	2	72160000	72180000	1.60865	-1.82968	3.43833	-	-	-	-	-	-
Liver-specific A compartments	2	72180000	72200000	1.71722	-1.80807	3.52529	-	-	-	-	-	-
Liver-specific A compartments	2	72200000	72220000	1.74833	-1.81588	3.56422	ENSSSCG00000040016	Unknown	42.26	4.74	3.22938	1.91384e-16
Liver-specific A compartments	2	72220000	72240000	1.7748	-1.80496	3.57976	-	-	-	-	-	-
Liver-specific A compartments	2	72240000	72260000	2.03189	-1.68391	3.7158	-	-	-	-	-	-
Liver-specific A compartments	2	72260000	72280000	1.43831	-1.2871	2.72541	-	-	-	-	-	-
Liver-specific A compartments	2	72280000	72300000	2.25017	-1.48349	3.73366	-	-	-	-	-	-
Liver-specific A compartments	2	72300000	72320000	2.52185	-1.09444	3.61628	ENSSSCG00000013556	ADGRE1	51.89	0.18	8.14271	1.54263e-57
Liver-specific A compartments	2	83200000	83220000	1.35132	-0.3958	1.74712	-	-	-	-	-	-
Liver-specific A compartments	2	83220000	83240000	1.30698	-0.323921	1.6309	-	-	-	-	-	-
Liver-specific A compartments	2	83860000	83880000	0.952325	-0.990628	1.94295	-	-	-	-	-	-
Liver-specific A compartments	2	83880000	83900000	0.705158	-1.32795	2.03311	-	-	-	-	-	-
Liver-specific A compartments	2	83900000	83920000	0.616335	-1.24722	1.86356	-	-	-	-	-	-
Liver-specific A compartments	2	83920000	83940000	0.498766	-1.22926	1.72803	ENSSSCG00000014076	FAM169A	16.46	57.35	-1.66141	2.12942e-10
Liver-specific A compartments	2	83940000	83960000	0.381916	-1.66253	2.04444	-	-	-	-	-	-
Liver-specific A compartments	2	84020000	84040000	0.230502	-2.55092	2.78142	-	-	-	-	-	-
Liver-specific A compartments	2	84060000	84080000	0.441975	-2.37187	2.81384	-	-	-	-	-	-
Liver-specific A compartments	2	84080000	84100000	0.415967	-2.35562	2.77159	-	-	-	-	-	-
Liver-specific A compartments	2	84120000	84140000	0.358044	-1.98133	2.33938	ENSSSCG00000029710	GCNT4	1.21	5.46	-2.04305	2.65621e-17
Liver-specific A compartments	2	84280000	84300000	0.476885	-2.42	2.89688	-	-	-	-	-	-
Liver-specific A compartments	2	84300000	84320000	0.807207	-1.27484	2.08204	-	-	-	-	-	-
Liver-specific A compartments	2	84320000	84340000	1.26527	-1.20261	2.46788	ENSSSCG00000014079	ANKRD31	4.24	5.11	-0.0694543	0.836645
Liver-specific A compartments	2	84340000	84360000	1.24496	-1.39315	2.63811	-	-	-	-	-	-
Liver-specific A compartments	2	84360000	84380000	1.47364	-0.507982	1.98162	-	-	-	-	-	-
Liver-specific A compartments	2	84400000	84420000	1.59905	-0.441464	2.04051	-	-	-	-	-	-
Liver-specific A compartments	2	84420000	84440000	1.7363	-0.56323	2.29953	-	-	-	-	-	-
Liver-specific A compartments	2	84440000	84460000	1.97473	-0.693074	2.66781	-	-	-	-	-	-
Liver-specific A compartments	2	84460000	84480000	1.87049	-0.664867	2.53535	-	-	-	-	-	-
Liver-specific A compartments	2	84480000	84500000	2.09086	-0.40242	2.49328	-	-	-	-	-	-
Liver-specific A compartments	2	84500000	84520000	2.32786	-0.491439	2.8193	-	-	-	-	-	-
Liver-specific A compartments	2	84540000	84560000	2.37799	-0.244959	2.62295	-	-	-	-	-	-
Liver-specific A compartments	2	84560000	84580000	2.19749	-0.616139	2.81363	-	-	-	-	-	-
Liver-specific A compartments	2	84580000	84600000	1.9894	-0.539873	2.52928	-	-	-	-	-	-
Liver-specific A compartments	2	84600000	84620000	1.82867	-0.740456	2.56913	-	-	-	-	-	-
Liver-specific A compartments	2	84620000	84640000	1.77399	-1.03958	2.81357	ENSSSCG00000014083	ANKDD1B	5.11	1.41	1.7279	1.50076e-15
Liver-specific A compartments	2	84640000	84660000	1.63167	-1.34418	2.97585	-	-	-	-	-	-
Liver-specific A compartments	2	84660000	84680000	1.58804	-1.18774	2.77579	-	-	-	-	-	-
Liver-specific A compartments	2	84680000	84700000	1.46939	-0.920658	2.39005	-	-	-	-	-	-
Liver-specific A compartments	2	84700000	84720000	1.44207	-1.06431	2.50638	-	-	-	-	-	-
Liver-specific A compartments	2	84720000	84740000	1.32595	-1.00301	2.32896	ENSSSCG00000014084	POC5	19.86	15.25	0.375845	0.0180908
Liver-specific A compartments	2	84740000	84760000	0.895428	-2.00649	2.90192	-	-	-	-	-	-
Liver-specific A compartments	2	84760000	84780000	0.565039	-2.86944	3.43448	-	-	-	-	-	-
Liver-specific A compartments	2	84780000	84800000	0.434887	-3.18494	3.61983	-	-	-	-	-	-
Liver-specific A compartments	2	85080000	85100000	0.407143	-2.38904	2.79618	-	-	-	-	-	-
Liver-specific A compartments	2	85100000	85120000	0.529895	-2.50406	3.03396	-	-	-	-	-	-
Liver-specific A compartments	2	85120000	85140000	0.607266	-2.44536	3.05262	-	-	-	-	-	-
Liver-specific A compartments	2	85140000	85160000	0.723185	-2.38351	3.1067	-	-	-	-	-	-
Liver-specific A compartments	2	85160000	85180000	0.893928	-2.10318	2.99711	-	-	-	-	-	-
Liver-specific A compartments	2	85180000	85200000	1.11738	-2.06723	3.18461	-	-	-	-	-	-
Liver-specific A compartments	2	85200000	85220000	1.35524	-1.97045	3.32568	-	-	-	-	-	-
Liver-specific A compartments	2	85220000	85240000	1.72643	-1.44943	3.17586	-	-	-	-	-	-
Liver-specific A compartments	2	85240000	85260000	1.8404	-1.30241	3.14282	-	-	-	-	-	-
Liver-specific A compartments	2	85260000	85280000	2.12214	-1.29492	3.41706	-	-	-	-	-	-
Liver-specific A compartments	2	85280000	85300000	2.14926	-0.767907	2.91717	ENSSSCG00000014088	IQGAP2	289.27	10.77	4.71839	1.07209e-85
Liver-specific A compartments	2	85300000	85320000	2.25463	-0.816747	3.07137	-	-	-	-	-	-
Liver-specific A compartments	2	85320000	85340000	2.16442	-0.884888	3.04931	-	-	-	-	-	-
Liver-specific A compartments	2	85340000	85360000	2.50818	-0.990889	3.49907	-	-	-	-	-	-
Liver-specific A compartments	2	85360000	85380000	2.34679	-0.94392	3.29071	-	-	-	-	-	-
Liver-specific A compartments	2	85380000	85400000	2.26848	-0.960107	3.22858	-	-	-	-	-	-
Liver-specific A compartments	2	85400000	85420000	2.16029	-1.19633	3.35662	-	-	-	-	-	-
Liver-specific A compartments	2	85420000	85440000	2.08217	-1.18119	3.26336	-	-	-	-	-	-
Liver-specific A compartments	2	85440000	85460000	2.02008	-1.27055	3.29063	-	-	-	-	-	-
Liver-specific A compartments	2	85460000	85480000	2.02134	-1.28911	3.31045	-	-	-	-	-	-
Liver-specific A compartments	2	85480000	85500000	2.04335	-0.991272	3.03462	-	-	-	-	-	-
Liver-specific A compartments	2	85500000	85520000	2.09152	-0.872655	2.96417	-	-	-	-	-	-
Liver-specific A compartments	2	85520000	85540000	2.23501	-0.963625	3.19863	-	-	-	-	-	-
Liver-specific A compartments	2	85540000	85560000	2.32819	-0.733265	3.06146	ENSSSCG00000037582	F2RL2	1.87	11.79	-2.23349	5.44267e-05
Liver-specific A compartments	2	85560000	85580000	2.25159	-0.370417	2.62201	-	-	-	-	-	-
Liver-specific A compartments	2	85580000	85600000	2.19602	-0.530972	2.727	-	-	-	-	-	-
Liver-specific A compartments	2	85600000	85620000	2.23137	-0.66422	2.89559	-	-	-	-	-	-
Liver-specific A compartments	2	85620000	85640000	2.25113	-0.724884	2.97602	-	-	-	-	-	-
Liver-specific A compartments	2	85640000	85660000	2.11546	-0.507987	2.62345	ENSSSCG00000035355	F2R	19.52	8.3	1.10858	5.19336e-05
Liver-specific A compartments	2	85660000	85680000	1.97725	-0.896212	2.87346	-	-	-	-	-	-
Liver-specific A compartments	2	85680000	85700000	1.86356	-0.892828	2.75638	-	-	-	-	-	-
Liver-specific A compartments	2	85700000	85720000	1.68226	-0.314621	1.99688	ENSSSCG00000046695	Unknown	2.34	6.51	-1.386	5.26434e-05
Liver-specific A compartments	2	85720000	85740000	1.64693	-0.585737	2.23267	ENSSSCG00000014091	F2RL1	0.97	1.15	-0.0610637	0.828138
Liver-specific A compartments	2	85740000	85760000	1.51667	-0.836485	2.35315	-	-	-	-	-	-
Liver-specific A compartments	2	85760000	85780000	1.42587	-0.996408	2.42228	ENSSSCG00000014092	S100Z	1.79	1.49	0.345731	0.520928
Liver-specific A compartments	2	85780000	85800000	1.42129	-1.59473	3.01601	-	-	-	-	-	-
Liver-specific A compartments	2	85800000	85820000	1.46188	-1.82097	3.28285	ENSSSCG00000014093	CRHBP	0.47	49.68	-6.94702	1.22798e-121
Liver-specific A compartments	2	85820000	85840000	1.4851	-1.70356	3.18866	-	-	-	-	-	-
Liver-specific A compartments	2	85840000	85860000	1.67087	-1.64818	3.31905	-	-	-	-	-	-
Liver-specific A compartments	2	85860000	85880000	1.79205	-1.12843	2.92047	-	-	-	-	-	-
Liver-specific A compartments	2	85900000	85920000	2.28541	-0.508383	2.79379	-	-	-	-	-	-
Liver-specific A compartments	2	85920000	85940000	2.2262	-0.610481	2.83668	-	-	-	-	-	-
Liver-specific A compartments	2	85940000	85960000	2.25088	-0.554139	2.80502	ENSSSCG00000014097;ENSSSCG00000041248	PDE8B;ZBED3	10.06;8.49	65.38;7.03	-2.7490395192933;0.187045246116539	6.0460648551398e-29;0.609692991932194
Liver-specific A compartments	2	85960000	85980000	2.19673	-1.25845	3.45519	-	-	-	-	-	-
Liver-specific A compartments	2	85980000	86000000	1.9666	-1.44748	3.41408	-	-	-	-	-	-
Liver-specific A compartments	2	86000000	86020000	1.60241	-1.33585	2.93826	-	-	-	-	-	-
Liver-specific A compartments	2	86020000	86040000	1.79394	-1.38192	3.17587	-	-	-	-	-	-
Liver-specific A compartments	2	86040000	86060000	1.62712	-1.73324	3.36036	-	-	-	-	-	-
Liver-specific A compartments	2	86060000	86080000	1.45231	-1.92475	3.37706	-	-	-	-	-	-
Liver-specific A compartments	2	86080000	86100000	1.48549	-1.6301	3.11559	-	-	-	-	-	-
Liver-specific A compartments	2	86100000	86120000	1.37925	-1.71372	3.09298	-	-	-	-	-	-
Liver-specific A compartments	2	86120000	86140000	1.3812	-1.6826	3.06381	-	-	-	-	-	-
Liver-specific A compartments	2	86140000	86160000	1.40951	-1.61822	3.02773	-	-	-	-	-	-
Liver-specific A compartments	2	86160000	86180000	1.33623	-1.74719	3.08341	-	-	-	-	-	-
Liver-specific A compartments	2	86180000	86200000	1.3487	-1.91785	3.26655	-	-	-	-	-	-
Liver-specific A compartments	2	86200000	86220000	1.21461	-1.82666	3.04127	-	-	-	-	-	-
Liver-specific A compartments	2	86220000	86240000	1.15097	-2.05672	3.2077	-	-	-	-	-	-
Liver-specific A compartments	2	86240000	86260000	0.996355	-2.28632	3.28268	-	-	-	-	-	-
Liver-specific A compartments	2	86260000	86280000	0.944708	-2.05164	2.99634	-	-	-	-	-	-
Liver-specific A compartments	2	86280000	86300000	1.05148	-1.88842	2.9399	-	-	-	-	-	-
Liver-specific A compartments	2	86300000	86320000	1.21059	-1.56253	2.77312	-	-	-	-	-	-
Liver-specific A compartments	2	86320000	86340000	1.32197	-1.19689	2.51886	-	-	-	-	-	-
Liver-specific A compartments	2	86340000	86360000	1.35702	-1.153	2.51002	-	-	-	-	-	-
Liver-specific A compartments	2	86360000	86380000	1.45931	-0.882078	2.34138	-	-	-	-	-	-
Liver-specific A compartments	2	86380000	86400000	0.899709	-1.69477	2.59448	ENSSSCG00000014098;ENSSSCG00000042360	WDR41;Unknown	90.25;1.23	40.9;3.98	1.14578992712073;-1.66136823361678	1.96173777985133e-05;4.10498416446128e-07
Liver-specific A compartments	2	86400000	86420000	0.641916	-2.511	3.15292	-	-	-	-	-	-
Liver-specific A compartments	2	86540000	86560000	0.503474	-1.62912	2.1326	-	-	-	-	-	-
Liver-specific A compartments	2	86560000	86580000	0.654184	-1.89114	2.54532	-	-	-	-	-	-
Liver-specific A compartments	2	86580000	86600000	1.0442	-1.6182	2.66239	-	-	-	-	-	-
Liver-specific A compartments	2	86600000	86620000	1.18835	-1.45657	2.64492	-	-	-	-	-	-
Liver-specific A compartments	2	86620000	86640000	1.39805	-1.27592	2.67397	-	-	-	-	-	-
Liver-specific A compartments	2	86640000	86660000	1.54323	-0.872099	2.41533	-	-	-	-	-	-
Liver-specific A compartments	2	86660000	86680000	1.22828	-1.03814	2.26641	ENSSSCG00000014100	TBCA	261.84	53.21	2.23156	3.69239e-25
Liver-specific A compartments	2	86680000	86700000	0.788823	-1.77391	2.56273	-	-	-	-	-	-
Liver-specific A compartments	2	86700000	86720000	0.66439	-1.83532	2.49971	-	-	-	-	-	-
Liver-specific A compartments	2	86720000	86740000	0.560089	-1.75028	2.31037	-	-	-	-	-	-
Liver-specific A compartments	2	86740000	86760000	0.457712	-2.37128	2.82899	-	-	-	-	-	-
Liver-specific A compartments	2	86800000	86820000	0.509244	-2.59028	3.09953	-	-	-	-	-	-
Liver-specific A compartments	2	86820000	86840000	0.57115	-2.26575	2.83691	-	-	-	-	-	-
Liver-specific A compartments	2	86840000	86860000	0.620128	-1.85004	2.47017	-	-	-	-	-	-
Liver-specific A compartments	2	86860000	86880000	1.06277	-1.38347	2.44624	-	-	-	-	-	-
Liver-specific A compartments	2	86880000	86900000	1.3507	-1.26552	2.61622	-	-	-	-	-	-
Liver-specific A compartments	2	86900000	86920000	1.36897	-1.49133	2.8603	-	-	-	-	-	-
Liver-specific A compartments	2	86920000	86940000	1.56462	-1.58536	3.14998	-	-	-	-	-	-
Liver-specific A compartments	2	86940000	86960000	1.77821	-1.44126	3.21947	-	-	-	-	-	-
Liver-specific A compartments	2	86960000	86980000	1.83004	-1.29194	3.12197	-	-	-	-	-	-
Liver-specific A compartments	2	86980000	87000000	1.76711	-1.30771	3.07482	-	-	-	-	-	-
Liver-specific A compartments	2	87000000	87020000	1.766	-1.26147	3.02747	-	-	-	-	-	-
Liver-specific A compartments	2	87020000	87040000	1.81738	-1.33421	3.15159	-	-	-	-	-	-
Liver-specific A compartments	2	87040000	87060000	2.0685	-1.43023	3.49872	-	-	-	-	-	-
Liver-specific A compartments	2	87060000	87080000	2.09895	-1.34176	3.44071	-	-	-	-	-	-
Liver-specific A compartments	2	87080000	87100000	2.1337	-1.28937	3.42308	-	-	-	-	-	-
Liver-specific A compartments	2	87100000	87120000	2.37175	-0.976673	3.34842	-	-	-	-	-	-
Liver-specific A compartments	2	87120000	87140000	2.58935	-0.481048	3.0704	-	-	-	-	-	-
Liver-specific A compartments	2	87140000	87160000	2.55744	-0.29265	2.85009	ENSSSCG00000014101	AP3B1	187.03	22.87	3.0129	9.73834e-73
Liver-specific A compartments	2	87160000	87180000	2.35957	-0.868296	3.22786	-	-	-	-	-	-
Liver-specific A compartments	2	87180000	87200000	2.52335	-0.81849	3.34184	-	-	-	-	-	-
Liver-specific A compartments	2	87220000	87240000	2.70795	-0.312185	3.02014	-	-	-	-	-	-
Liver-specific A compartments	2	87240000	87260000	2.80495	-0.357275	3.16222	-	-	-	-	-	-
Liver-specific A compartments	2	87540000	87560000	2.6933	-0.584522	3.27782	-	-	-	-	-	-
Liver-specific A compartments	2	87780000	87800000	3.30848	-0.5176	3.82608	-	-	-	-	-	-
Liver-specific A compartments	2	87800000	87820000	2.84005	-0.852715	3.69276	-	-	-	-	-	-
Liver-specific A compartments	2	87820000	87840000	2.75783	-1.09676	3.85459	ENSSSCG00000038535	ARSB	43.52	35.93	0.125828	0.653111
Liver-specific A compartments	2	87840000	87860000	2.88638	-1.24653	4.1329	-	-	-	-	-	-
Liver-specific A compartments	2	87860000	87880000	2.80423	-1.37493	4.17916	ENSSSCG00000014108;ENSSSCG00000014110	BHMT;DMGDH	5473.15;371.96	3.35;1.04	10.6862626887305;8.3076214720197	8.48653810211704e-189;2.97994477997433e-138
Liver-specific A compartments	2	87880000	87900000	2.93045	-1.46984	4.40029	-	-	-	-	-	-
Liver-specific A compartments	2	87900000	87920000	2.84179	-1.31573	4.15752	-	-	-	-	-	-
Liver-specific A compartments	2	87920000	87940000	2.60549	-0.835715	3.44121	-	-	-	-	-	-
Liver-specific A compartments	2	87940000	87960000	2.51783	-0.906912	3.42474	-	-	-	-	-	-
Liver-specific A compartments	2	87960000	87980000	2.6102	-1.18797	3.79817	-	-	-	-	-	-
Liver-specific A compartments	2	87980000	88000000	2.64572	-1.00465	3.65037	-	-	-	-	-	-
Liver-specific A compartments	2	88000000	88020000	2.91716	-0.576583	3.49374	-	-	-	-	-	-
Liver-specific A compartments	2	88020000	88040000	3.13317	-0.252678	3.38585	ENSSSCG00000014112	JMY	17.8	14.9	0.225022	0.345586
Liver-specific A compartments	2	88040000	88060000	2.75587	-0.57602	3.33189	-	-	-	-	-	-
Liver-specific A compartments	2	88060000	88080000	2.60854	-0.901158	3.5097	-	-	-	-	-	-
Liver-specific A compartments	2	88080000	88100000	2.60709	-1.10621	3.71329	-	-	-	-	-	-
Liver-specific A compartments	2	88100000	88120000	2.4041	-1.25862	3.66272	-	-	-	-	-	-
Liver-specific A compartments	2	88120000	88140000	2.2942	-1.36928	3.66349	-	-	-	-	-	-
Liver-specific A compartments	2	88140000	88160000	2.41943	-1.33654	3.75597	-	-	-	-	-	-
Liver-specific A compartments	2	88160000	88180000	2.23706	-1.4995	3.73656	-	-	-	-	-	-
Liver-specific A compartments	2	88180000	88200000	2.31139	-1.33909	3.65048	-	-	-	-	-	-
Liver-specific A compartments	2	88200000	88220000	2.35646	-1.14587	3.50233	-	-	-	-	-	-
Liver-specific A compartments	2	88220000	88240000	2.44458	-0.968932	3.41351	-	-	-	-	-	-
Liver-specific A compartments	2	88240000	88260000	2.81324	-0.275693	3.08894	ENSSSCG00000014113;ENSSSCG00000014114	HOMER1;TENT2	100.61;80.98	169.56;34.72	-0.815024068975843;1.15302834518322	0.00121407526567336;3.02737174961694e-10
Liver-specific A compartments	2	88260000	88280000	1.97931	-0.835844	2.81515	-	-	-	-	-	-
Liver-specific A compartments	2	88280000	88300000	1.77284	-0.87043	2.64327	-	-	-	-	-	-
Liver-specific A compartments	2	88300000	88320000	1.88032	-0.56836	2.44868	-	-	-	-	-	-
Liver-specific A compartments	2	88320000	88340000	2.01483	-0.298537	2.31337	-	-	-	-	-	-
Liver-specific A compartments	2	88340000	88360000	1.97113	-0.406942	2.37807	-	-	-	-	-	-
Liver-specific A compartments	2	88360000	88380000	1.71339	-0.577885	2.29128	-	-	-	-	-	-
Liver-specific A compartments	2	88380000	88400000	1.42065	-0.814506	2.23515	ENSSSCG00000026098	CMYA5	3.3	1.45	1.29563	2.02364e-05
Liver-specific A compartments	2	88400000	88420000	0.950802	-1.53694	2.48775	-	-	-	-	-	-
Liver-specific A compartments	2	88420000	88440000	0.715267	-1.9127	2.62797	-	-	-	-	-	-
Liver-specific A compartments	2	88440000	88460000	0.445013	-1.88944	2.33445	-	-	-	-	-	-
Liver-specific A compartments	2	88460000	88480000	0.629304	-1.99257	2.62187	-	-	-	-	-	-
Liver-specific A compartments	2	88480000	88500000	0.480193	-1.92358	2.40377	-	-	-	-	-	-
Liver-specific A compartments	2	88500000	88520000	0.498582	-1.75035	2.24893	-	-	-	-	-	-
Liver-specific A compartments	2	88520000	88540000	0.566568	-1.73778	2.30435	-	-	-	-	-	-
Liver-specific A compartments	2	88540000	88560000	0.583625	-1.37073	1.95436	-	-	-	-	-	-
Liver-specific A compartments	2	88560000	88580000	0.632079	-1.2342	1.86628	-	-	-	-	-	-
Liver-specific A compartments	2	88580000	88600000	0.655366	-1.27739	1.93275	-	-	-	-	-	-
Liver-specific A compartments	2	88600000	88620000	0.506942	-1.40383	1.91077	-	-	-	-	-	-
Liver-specific A compartments	2	88620000	88640000	0.657916	-1.19493	1.85284	-	-	-	-	-	-
Liver-specific A compartments	2	88640000	88660000	0.767849	-1.10109	1.86894	-	-	-	-	-	-
Liver-specific A compartments	2	88660000	88680000	0.844575	-0.789448	1.63402	-	-	-	-	-	-
Liver-specific A compartments	2	88680000	88700000	0.707715	-1.19231	1.90003	ENSSSCG00000014116	MTX3	36.28	46.44	-0.38467	0.124944
Liver-specific A compartments	2	88700000	88720000	0.648973	-1.42693	2.07591	-	-	-	-	-	-
Liver-specific A compartments	2	88720000	88740000	0.711049	-1.60153	2.31258	ENSSSCG00000014117	THBS4	0.74	7.07	-3.286	4.74792e-18
Liver-specific A compartments	2	88740000	88760000	0.799177	-1.49024	2.28941	-	-	-	-	-	-
Liver-specific A compartments	2	88760000	88780000	0.868364	-0.983824	1.85219	-	-	-	-	-	-
Liver-specific A compartments	2	88780000	88800000	1.0683	-0.369009	1.43731	-	-	-	-	-	-
Liver-specific A compartments	2	89060000	89080000	1.26209	-0.383242	1.64533	-	-	-	-	-	-
Liver-specific A compartments	2	89080000	89100000	1.20483	-0.501332	1.70616	-	-	-	-	-	-
Liver-specific A compartments	2	89100000	89120000	1.14402	-0.438675	1.58269	ENSSSCG00000014123	FAM151B	77.33	16.89	2.05524	4.47654e-15
Liver-specific A compartments	2	89120000	89140000	0.749423	-1.06494	1.81437	-	-	-	-	-	-
Liver-specific A compartments	2	89140000	89160000	0.560872	-1.39318	1.95405	-	-	-	-	-	-
Liver-specific A compartments	2	89160000	89180000	0.408929	-1.60617	2.0151	ENSSSCG00000014124	ANKRD34B	2.26	5.01	-0.971782	0.0724015
Liver-specific A compartments	2	89220000	89240000	0.467532	-1.2036	1.67113	-	-	-	-	-	-
Liver-specific A compartments	2	89240000	89260000	0.624041	-0.518841	1.14288	ENSSSCG00000014126;ENSSSCG00000031117	MSH3;DHFR2	23.64;280.68	22.86;9.73	0.0596380347044742;4.74759460638079	0.775832630792121;2.0546195010164e-38
Liver-specific A compartments	2	89260000	89280000	0.447776	-0.751149	1.19893	-	-	-	-	-	-
Liver-specific A compartments	2	102400000	102420000	0.427337	-1.93032	2.35766	-	-	-	-	-	-
Liver-specific A compartments	2	102420000	102440000	0.609637	-1.34101	1.95065	ENSSSCG00000039731	GLRX	278.56	51.46	2.44456	3.56912e-24
Liver-specific A compartments	2	102440000	102460000	0.595607	-1.30562	1.90123	-	-	-	-	-	-
Liver-specific A compartments	2	102460000	102480000	0.455812	-1.39031	1.84612	-	-	-	-	-	-
Liver-specific A compartments	2	102480000	102500000	0.581078	-1.59324	2.17432	-	-	-	-	-	-
Liver-specific A compartments	2	102500000	102520000	0.569747	-2.19629	2.76604	-	-	-	-	-	-
Liver-specific A compartments	2	102520000	102540000	0.583542	-2.28815	2.87169	-	-	-	-	-	-
Liver-specific A compartments	2	102540000	102560000	0.849853	-2.20457	3.05443	-	-	-	-	-	-
Liver-specific A compartments	2	102560000	102580000	1.09599	-1.79141	2.8874	-	-	-	-	-	-
Liver-specific A compartments	2	102580000	102600000	1.02149	-1.25993	2.28141	ENSSSCG00000014168	ELL2	89.32	40.07	1.1048	2.71223e-08
Liver-specific A compartments	2	102600000	102620000	0.80076	-2.37204	3.1728	-	-	-	-	-	-
Liver-specific A compartments	2	102620000	102640000	0.591567	-2.95125	3.54282	-	-	-	-	-	-
Liver-specific A compartments	2	102640000	102660000	0.626189	-3.00472	3.63091	-	-	-	-	-	-
Liver-specific A compartments	2	102660000	102680000	0.605956	-3.09638	3.70233	-	-	-	-	-	-
Liver-specific A compartments	2	102700000	102720000	0.49142	-3.12001	3.61143	-	-	-	-	-	-
Liver-specific A compartments	2	102740000	102760000	0.361872	-3.07271	3.43458	-	-	-	-	-	-
Liver-specific A compartments	2	102840000	102860000	0.372396	-2.96549	3.33788	-	-	-	-	-	-
Liver-specific A compartments	2	102860000	102880000	0.456291	-2.59701	3.0533	-	-	-	-	-	-
Liver-specific A compartments	2	102880000	102900000	0.451327	-2.62164	3.07297	-	-	-	-	-	-
Liver-specific A compartments	2	114340000	114360000	0.769551	-0.435613	1.20516	-	-	-	-	-	-
Liver-specific A compartments	2	114360000	114380000	0.794214	-0.308579	1.10279	-	-	-	-	-	-
Liver-specific A compartments	2	114660000	114680000	0.483491	-0.801306	1.2848	ENSSSCG00000014195;ENSSSCG00000022845	MAN2A1;PJA2	180.64;177.08	32;317.38	2.49977660267742;-0.855679188114699	7.67142703657266e-21;4.87598627880138e-05
Liver-specific A compartments	2	114680000	114700000	0.649986	-0.691462	1.34145	-	-	-	-	-	-
Liver-specific A compartments	2	114700000	114720000	0.670428	-0.994247	1.66468	-	-	-	-	-	-
Liver-specific A compartments	2	114720000	114740000	0.500458	-1.23611	1.73656	-	-	-	-	-	-
Liver-specific A compartments	2	114740000	114760000	0.419263	-1.28634	1.7056	-	-	-	-	-	-
Liver-specific A compartments	2	114760000	114780000	0.358837	-1.31653	1.67537	-	-	-	-	-	-
Liver-specific A compartments	2	116260000	116280000	0.731662	-0.886682	1.61834	-	-	-	-	-	-
Liver-specific A compartments	2	116280000	116300000	0.89044	-1.18868	2.07912	ENSSSCG00000014203	MCC	10.12	26.22	-1.17384	4.40781e-08
Liver-specific A compartments	2	116300000	116320000	1.23598	-1.76178	2.99776	-	-	-	-	-	-
Liver-specific A compartments	2	116320000	116340000	1.18841	-1.96146	3.14987	-	-	-	-	-	-
Liver-specific A compartments	2	116340000	116360000	1.10228	-2.02194	3.12422	-	-	-	-	-	-
Liver-specific A compartments	2	116360000	116380000	0.797414	-1.86492	2.66234	-	-	-	-	-	-
Liver-specific A compartments	2	116380000	116400000	0.71465	-1.54711	2.26176	-	-	-	-	-	-
Liver-specific A compartments	2	116400000	116420000	0.950269	-1.25394	2.2042	-	-	-	-	-	-
Liver-specific A compartments	2	116420000	116440000	0.988875	-1.20934	2.19822	-	-	-	-	-	-
Liver-specific A compartments	2	116440000	116460000	1.31498	-0.675766	1.99075	-	-	-	-	-	-
Liver-specific A compartments	2	116460000	116480000	1.58939	-0.604589	2.19398	-	-	-	-	-	-
Liver-specific A compartments	2	116480000	116500000	1.34903	-0.9158	2.26483	-	-	-	-	-	-
Liver-specific A compartments	2	116500000	116520000	1.26001	-0.904409	2.16442	-	-	-	-	-	-
Liver-specific A compartments	2	116520000	116540000	1.37707	-0.789566	2.16663	-	-	-	-	-	-
Liver-specific A compartments	2	116540000	116560000	1.25705	-0.67787	1.93492	-	-	-	-	-	-
Liver-specific A compartments	2	116560000	116580000	1.27571	-0.919778	2.19548	-	-	-	-	-	-
Liver-specific A compartments	2	116580000	116600000	1.17225	-0.887453	2.0597	-	-	-	-	-	-
Liver-specific A compartments	2	116600000	116620000	1.20187	-0.894914	2.09679	-	-	-	-	-	-
Liver-specific A compartments	2	116620000	116640000	1.17176	-1.12302	2.29477	-	-	-	-	-	-
Liver-specific A compartments	2	116640000	116660000	1.34357	-1.08314	2.42671	-	-	-	-	-	-
Liver-specific A compartments	2	116660000	116680000	1.46928	-0.690064	2.15934	-	-	-	-	-	-
Liver-specific A compartments	2	116680000	116700000	1.49646	-0.642816	2.13928	-	-	-	-	-	-
Liver-specific A compartments	2	116700000	116720000	1.47903	-0.607678	2.08671	-	-	-	-	-	-
Liver-specific A compartments	2	116720000	116740000	1.9138	-0.467539	2.38133	-	-	-	-	-	-
Liver-specific A compartments	2	116740000	116760000	2.36477	-0.281729	2.6465	-	-	-	-	-	-
Liver-specific A compartments	2	116760000	116780000	2.35753	-0.309208	2.66674	-	-	-	-	-	-
Liver-specific A compartments	2	116780000	116800000	2.54878	-0.18435	2.73313	-	-	-	-	-	-
Liver-specific A compartments	2	116820000	116840000	2.74327	-0.645462	3.38873	-	-	-	-	-	-
Liver-specific A compartments	2	117100000	117120000	1.61856	-0.431813	2.05037	-	-	-	-	-	-
Liver-specific A compartments	2	117160000	117180000	0.979031	-0.807347	1.78638	-	-	-	-	-	-
Liver-specific A compartments	2	117180000	117200000	0.60646	-1.22804	1.8345	-	-	-	-	-	-
Liver-specific A compartments	2	117200000	117220000	0.597099	-1.42228	2.01937	-	-	-	-	-	-
Liver-specific A compartments	2	117220000	117240000	0.410011	-1.33016	1.74018	ENSSSCG00000029860	EPB41L4A	23.53	12.21	0.916337	2.82621e-05
Liver-specific A compartments	2	117240000	117260000	0.535042	-1.6426	2.17764	-	-	-	-	-	-
Liver-specific A compartments	2	117280000	117300000	0.452526	-2.27236	2.72489	-	-	-	-	-	-
Liver-specific A compartments	2	117460000	117480000	0.533984	-1.07106	1.60504	-	-	-	-	-	-
Liver-specific A compartments	2	117480000	117500000	0.643818	-0.887866	1.53168	-	-	-	-	-	-
Liver-specific A compartments	2	119700000	119720000	0.718827	-0.635084	1.35391	-	-	-	-	-	-
Liver-specific A compartments	2	119720000	119740000	0.657357	-0.854741	1.5121	-	-	-	-	-	-
Liver-specific A compartments	2	126300000	126320000	0.427547	-1.39575	1.8233	-	-	-	-	-	-
Liver-specific A compartments	2	126320000	126340000	0.555365	-1.18166	1.73703	-	-	-	-	-	-
Liver-specific A compartments	2	126340000	126360000	0.636164	-0.874805	1.51097	ENSSSCG00000039373	SNX24	122.25	55.61	0.980204	7.07772e-05
Liver-specific A compartments	2	126920000	126940000	0.712143	-0.976745	1.68889	ENSSSCG00000014239	CEP120	33.26	30.74	0.145158	0.554994
Liver-specific A compartments	2	126940000	126960000	0.528332	-1.83205	2.36039	-	-	-	-	-	-
Liver-specific A compartments	2	126960000	126980000	0.518714	-2.06945	2.58817	-	-	-	-	-	-
Liver-specific A compartments	2	127000000	127020000	0.612762	-1.10136	1.71412	ENSSSCG00000014240	CSNK1G3	39.71	34.45	0.247052	0.186942
Liver-specific A compartments	2	127020000	127040000	0.696765	-0.98054	1.67731	-	-	-	-	-	-
Liver-specific A compartments	2	127040000	127060000	0.488538	-1.08415	1.57269	-	-	-	-	-	-
Liver-specific A compartments	2	129500000	129520000	0.671239	-0.806566	1.47781	ENSSSCG00000022402	GRAMD2B	44.19	66.32	-0.582619	0.00014241
Liver-specific A compartments	2	129520000	129540000	0.685164	-0.809027	1.49419	-	-	-	-	-	-
Liver-specific A compartments	2	129620000	129640000	0.487146	-0.690143	1.17729	-	-	-	-	-	-
Liver-specific A compartments	2	129640000	129660000	0.534236	-0.555457	1.08969	-	-	-	-	-	-
Liver-specific A compartments	2	129720000	129740000	0.834514	-0.551462	1.38598	ENSSSCG00000040454	TEX43	0.46	0.33	-	-
Liver-specific A compartments	2	129740000	129760000	0.667752	-0.766085	1.43384	-	-	-	-	-	-
Liver-specific A compartments	2	129760000	129780000	0.954835	-1.1206	2.07544	-	-	-	-	-	-
Liver-specific A compartments	2	129780000	129800000	0.972543	-0.893389	1.86593	-	-	-	-	-	-
Liver-specific A compartments	2	129820000	129840000	1.14338	-0.36757	1.51095	-	-	-	-	-	-
Liver-specific A compartments	2	129840000	129860000	0.825043	-0.689112	1.51416	-	-	-	-	-	-
Liver-specific A compartments	2	129880000	129900000	0.47033	-0.994196	1.46453	-	-	-	-	-	-
Liver-specific A compartments	2	129920000	129940000	0.437319	-0.840192	1.27751	-	-	-	-	-	-
Liver-specific A compartments	2	129960000	129980000	0.628808	-1.08608	1.71488	-	-	-	-	-	-
Liver-specific A compartments	2	129980000	130000000	0.737258	-1.14021	1.87746	-	-	-	-	-	-
Liver-specific A compartments	2	133940000	133960000	1.1301	-0.54446	1.67456	ENSSSCG00000014267	AC008695.1	27.72	48.99	-0.744257	4.21917e-09
Liver-specific A compartments	2	133960000	133980000	1.08513	-1.06104	2.14617	-	-	-	-	-	-
Liver-specific A compartments	2	133980000	134000000	1.07108	-1.39026	2.46134	-	-	-	-	-	-
Liver-specific A compartments	2	134000000	134020000	1.077	-1.33707	2.41407	-	-	-	-	-	-
Liver-specific A compartments	2	134020000	134040000	0.92869	-1.35484	2.28353	-	-	-	-	-	-
Liver-specific A compartments	2	134040000	134060000	1.10608	-1.18618	2.29226	-	-	-	-	-	-
Liver-specific A compartments	2	134060000	134080000	0.993939	-1.15257	2.14651	-	-	-	-	-	-
Liver-specific A compartments	2	134080000	134100000	0.808615	-0.769014	1.57763	ENSSSCG00000014269	FNIP1	47.07	37.11	0.264294	0.315274
Liver-specific A compartments	2	134580000	134600000	2.22889	-0.570755	2.79965	ENSSSCG00000014275;ENSSSCG00000020915	SLC22A4;P4HA2	1.49;62.07	1.22;5.28	0.282222650677161;3.49400411077504	0.399279722717654;4.93112569088474e-48
Liver-specific A compartments	2	134600000	134620000	2.21159	-0.279483	2.49107	-	-	-	-	-	-
Liver-specific A compartments	2	134620000	134640000	2.37565	-0.368162	2.74381	-	-	-	-	-	-
Liver-specific A compartments	2	144800000	144820000	0.995227	-0.416781	1.41201	-	-	-	-	-	-
Liver-specific A compartments	2	144960000	144980000	0.767869	-0.568186	1.33606	-	-	-	-	-	-
Liver-specific A compartments	2	144980000	145000000	0.904512	-0.79295	1.69746	-	-	-	-	-	-
Liver-specific A compartments	2	145000000	145020000	0.61495	-0.933687	1.54864	ENSSSCG00000044525	Unknown	0.5	0.83	-0.405227	0.593609
Liver-specific A compartments	2	145020000	145040000	0.637347	-1.00789	1.64524	-	-	-	-	-	-
Liver-specific A compartments	2	145040000	145060000	0.600055	-0.879689	1.47974	-	-	-	-	-	-
Liver-specific A compartments	2	145080000	145100000	0.500019	-0.967776	1.4678	-	-	-	-	-	-
Liver-specific A compartments	2	145100000	145120000	0.542849	-0.872851	1.4157	-	-	-	-	-	-
Liver-specific A compartments	2	145120000	145140000	0.70535	-0.670893	1.37624	-	-	-	-	-	-
Liver-specific A compartments	2	145140000	145160000	0.483953	-0.585393	1.06935	-	-	-	-	-	-
Liver-specific A compartments	2	145160000	145180000	0.351849	-0.598691	0.95054	-	-	-	-	-	-
Liver-specific A compartments	3	45060000	45080000	1.71233	-0.197351	1.90968	-	-	-	-	-	-
Liver-specific A compartments	3	45080000	45100000	1.64622	-0.245263	1.89148	-	-	-	-	-	-
Liver-specific A compartments	3	45100000	45120000	1.67171	-0.246125	1.91784	-	-	-	-	-	-
Liver-specific A compartments	3	45220000	45240000	1.43251	-0.247379	1.67989	-	-	-	-	-	-
Liver-specific A compartments	3	45240000	45260000	1.40538	-0.429802	1.83519	-	-	-	-	-	-
Liver-specific A compartments	3	45260000	45280000	1.36563	-0.714735	2.08036	-	-	-	-	-	-
Liver-specific A compartments	3	45280000	45300000	1.21009	-0.730325	1.94041	-	-	-	-	-	-
Liver-specific A compartments	3	45300000	45320000	1.14652	-0.81638	1.9629	-	-	-	-	-	-
Liver-specific A compartments	3	45320000	45340000	1.11818	-0.969978	2.08816	-	-	-	-	-	-
Liver-specific A compartments	3	45340000	45360000	1.17037	-1.1394	2.30977	-	-	-	-	-	-
Liver-specific A compartments	3	45360000	45380000	1.1653	-1.05622	2.22152	-	-	-	-	-	-
Liver-specific A compartments	3	45380000	45400000	1.18206	-0.71429	1.89635	-	-	-	-	-	-
Liver-specific A compartments	3	45400000	45420000	1.32292	-0.497533	1.82045	-	-	-	-	-	-
Liver-specific A compartments	3	45420000	45440000	1.34843	-0.51924	1.86767	-	-	-	-	-	-
Liver-specific A compartments	3	45440000	45460000	1.2518	-0.360687	1.61249	-	-	-	-	-	-
Liver-specific A compartments	3	45460000	45480000	1.16206	-0.362381	1.52444	-	-	-	-	-	-
Liver-specific A compartments	3	45640000	45660000	1.63415	-0.329534	1.96368	-	-	-	-	-	-
Liver-specific A compartments	3	45660000	45680000	1.68554	-0.278256	1.9638	ENSSSCG00000028944	Unknown	10.63	0.86	3.29139	9.27633e-27
Liver-specific A compartments	3	45680000	45700000	1.60251	-0.264971	1.86748	-	-	-	-	-	-
Liver-specific A compartments	3	47820000	47840000	0.886698	-0.233381	1.12008	ENSSSCG00000022153	SULT1C2	12.32	2.23	2.30765	1.12512e-20
Liver-specific A compartments	3	52280000	52300000	0.337428	-1.13839	1.47581	ENSSSCG00000008162	IL1R1	318.64	3.25	6.7432	3.912e-113
Liver-specific A compartments	3	52680000	52700000	0.655099	-0.386032	1.04113	-	-	-	-	-	-
Liver-specific A compartments	3	52700000	52720000	0.5042	-0.33714	0.84134	-	-	-	-	-	-
Liver-specific A compartments	3	53000000	53020000	0.597485	-0.255795	0.85328	-	-	-	-	-	-
Liver-specific A compartments	3	55280000	55300000	0.599561	-0.536964	1.13653	-	-	-	-	-	-
Liver-specific A compartments	3	55300000	55320000	0.558942	-0.573187	1.13213	-	-	-	-	-	-
Liver-specific A compartments	3	55320000	55340000	0.598034	-0.539235	1.13727	-	-	-	-	-	-
Liver-specific A compartments	3	56020000	56040000	1.05827	-0.311865	1.37013	-	-	-	-	-	-
Liver-specific A compartments	3	56040000	56060000	1.10598	-0.449176	1.55516	-	-	-	-	-	-
Liver-specific A compartments	3	56060000	56080000	1.08273	-0.610106	1.69283	-	-	-	-	-	-
Liver-specific A compartments	3	56080000	56100000	1.22014	-0.614741	1.83488	-	-	-	-	-	-
Liver-specific A compartments	3	56100000	56120000	1.32859	-0.733267	2.06186	-	-	-	-	-	-
Liver-specific A compartments	3	56120000	56140000	1.44317	-0.511919	1.95508	-	-	-	-	-	-
Liver-specific A compartments	3	57500000	57520000	1.27239	-0.36169	1.63408	-	-	-	-	-	-
Liver-specific A compartments	3	57520000	57540000	0.8208	-0.929527	1.75033	ENSSSCG00000008209	TEX37	1.55	4.38	-1.42215	0.00100939
Liver-specific A compartments	3	57540000	57560000	0.690081	-1.19736	1.88744	-	-	-	-	-	-
Liver-specific A compartments	3	57580000	57600000	0.486992	-0.945669	1.43266	ENSSSCG00000036354	FOXI3	0.03	0	-	-
Liver-specific A compartments	3	57680000	57700000	0.586267	-1.48031	2.06658	-	-	-	-	-	-
Liver-specific A compartments	3	57720000	57740000	0.553229	-1.44212	1.99535	-	-	-	-	-	-
Liver-specific A compartments	3	57740000	57760000	0.626824	-1.30663	1.93345	-	-	-	-	-	-
Liver-specific A compartments	3	57760000	57780000	0.783836	-1.03736	1.8212	-	-	-	-	-	-
Liver-specific A compartments	3	57780000	57800000	1.04184	-0.408355	1.4502	-	-	-	-	-	-
Liver-specific A compartments	3	57840000	57860000	2.12974	-0.500344	2.63008	ENSSSCG00000008214	FABP1	2620.58	2.15	10.1981	0
Liver-specific A compartments	3	57860000	57880000	1.96595	-0.666917	2.63287	-	-	-	-	-	-
Liver-specific A compartments	3	57880000	57900000	2.01376	-0.716379	2.73014	-	-	-	-	-	-
Liver-specific A compartments	3	57900000	57920000	2.11384	-0.233845	2.34769	-	-	-	-	-	-
Liver-specific A compartments	3	59720000	59740000	1.3608	-0.372332	1.73313	-	-	-	-	-	-
Liver-specific A compartments	3	59740000	59760000	0.672958	-0.773411	1.44637	-	-	-	-	-	-
Liver-specific A compartments	3	59760000	59780000	0.85355	-0.423076	1.27663	ENSSSCG00000008245	TMSB10	4942.07	644.26	2.9216	9.34186e-24
Liver-specific A compartments	3	59780000	59800000	0.719759	-0.576436	1.2962	-	-	-	-	-	-
Liver-specific A compartments	3	59800000	59820000	0.389858	-0.820765	1.21062	-	-	-	-	-	-
Liver-specific A compartments	3	70320000	70340000	0.469442	-0.155569	0.62501	-	-	-	-	-	-
Liver-specific A compartments	3	70640000	70660000	0.365465	-0.559608	0.925073	-	-	-	-	-	-
Liver-specific A compartments	3	70660000	70680000	0.416437	-0.578526	0.994963	-	-	-	-	-	-
Liver-specific A compartments	3	71880000	71900000	1.96777	-0.404391	2.37216	-	-	-	-	-	-
Liver-specific A compartments	3	71900000	71920000	1.90122	-0.744282	2.6455	-	-	-	-	-	-
Liver-specific A compartments	3	71920000	71940000	1.91378	-0.759383	2.67316	-	-	-	-	-	-
Liver-specific A compartments	3	71940000	71960000	2.00719	-0.658575	2.66577	ENSSSCG00000008326	TGFA	7.91	9.18	-0.358138	0.273444
Liver-specific A compartments	3	71960000	71980000	2.12416	-0.634628	2.75878	-	-	-	-	-	-
Liver-specific A compartments	3	71980000	72000000	1.96917	-0.64707	2.61624	-	-	-	-	-	-
Liver-specific A compartments	3	72000000	72020000	1.89574	-0.747029	2.64277	-	-	-	-	-	-
Liver-specific A compartments	3	72020000	72040000	1.84231	-0.49592	2.33823	-	-	-	-	-	-
Liver-specific A compartments	3	72040000	72060000	1.89114	-0.579333	2.47047	-	-	-	-	-	-
Liver-specific A compartments	3	72060000	72080000	1.90662	-0.658574	2.56519	-	-	-	-	-	-
Liver-specific A compartments	3	72080000	72100000	2.01282	-0.638483	2.6513	-	-	-	-	-	-
Liver-specific A compartments	3	72100000	72120000	2.2019	-0.72662	2.92852	-	-	-	-	-	-
Liver-specific A compartments	3	72120000	72140000	2.26923	-0.528414	2.79764	-	-	-	-	-	-
Liver-specific A compartments	3	73680000	73700000	0.732907	-0.482989	1.2159	-	-	-	-	-	-
Liver-specific A compartments	3	73700000	73720000	0.716665	-0.799211	1.51588	-	-	-	-	-	-
Liver-specific A compartments	3	73720000	73740000	0.726788	-0.555183	1.28197	-	-	-	-	-	-
Liver-specific A compartments	3	73740000	73760000	0.733443	-0.373693	1.10714	-	-	-	-	-	-
Liver-specific A compartments	3	73760000	73780000	0.895772	-0.4823	1.37807	-	-	-	-	-	-
Liver-specific A compartments	3	73780000	73800000	0.894998	-0.429529	1.32453	ENSSSCG00000038148	PROKR1	0.82	2.07	-1.26852	0.000216911
Liver-specific A compartments	3	73860000	73880000	1.49801	-0.295785	1.7938	-	-	-	-	-	-
Liver-specific A compartments	3	73880000	73900000	1.62736	-0.336901	1.96426	-	-	-	-	-	-
Liver-specific A compartments	3	78040000	78060000	2.39195	-0.438018	2.82996	-	-	-	-	-	-
Liver-specific A compartments	3	78060000	78080000	2.22128	-0.778106	2.99939	-	-	-	-	-	-
Liver-specific A compartments	3	78080000	78100000	2.00711	-0.889926	2.89703	-	-	-	-	-	-
Liver-specific A compartments	3	78100000	78120000	2.12643	-0.979087	3.10552	-	-	-	-	-	-
Liver-specific A compartments	3	78120000	78140000	2.01094	-0.922035	2.93297	-	-	-	-	-	-
Liver-specific A compartments	3	78140000	78160000	2.01542	-0.969024	2.98444	-	-	-	-	-	-
Liver-specific A compartments	3	78160000	78180000	1.87357	-0.917258	2.79083	-	-	-	-	-	-
Liver-specific A compartments	3	78180000	78200000	1.67381	-0.703131	2.37694	-	-	-	-	-	-
Liver-specific A compartments	3	78200000	78220000	1.44632	-0.868314	2.31463	-	-	-	-	-	-
Liver-specific A compartments	3	78220000	78240000	1.57459	-0.972948	2.54754	-	-	-	-	-	-
Liver-specific A compartments	3	78240000	78260000	1.58622	-0.423234	2.00945	-	-	-	-	-	-
Liver-specific A compartments	3	78280000	78300000	0.95921	-0.91095	1.87016	-	-	-	-	-	-
Liver-specific A compartments	3	78300000	78320000	0.655145	-1.06118	1.71632	-	-	-	-	-	-
Liver-specific A compartments	3	78320000	78340000	0.637144	-1.03805	1.67519	-	-	-	-	-	-
Liver-specific A compartments	3	79180000	79200000	0.573639	-0.47118	1.04482	-	-	-	-	-	-
Liver-specific A compartments	3	79200000	79220000	0.555555	-0.518125	1.07368	-	-	-	-	-	-
Liver-specific A compartments	3	79220000	79240000	0.616737	-0.511996	1.12873	-	-	-	-	-	-
Liver-specific A compartments	3	79260000	79280000	0.589097	-0.424587	1.01368	-	-	-	-	-	-
Liver-specific A compartments	3	79280000	79300000	0.347255	-0.553055	0.900309	-	-	-	-	-	-
Liver-specific A compartments	3	79300000	79320000	0.395512	-0.557595	0.953106	-	-	-	-	-	-
Liver-specific A compartments	3	79320000	79340000	0.319349	-0.712673	1.03202	-	-	-	-	-	-
Liver-specific A compartments	3	79340000	79360000	0.284098	-0.64951	0.933608	-	-	-	-	-	-
Liver-specific A compartments	3	79400000	79420000	0.525977	-0.336947	0.862924	ENSSSCG00000026713	TMEM17	17.81	12.19	0.567343	0.0384353
Liver-specific A compartments	3	80060000	80080000	1.52015	-0.432858	1.95301	-	-	-	-	-	-
Liver-specific A compartments	3	80080000	80100000	1.57229	-0.568809	2.1411	-	-	-	-	-	-
Liver-specific A compartments	3	80160000	80180000	1.52095	-0.388317	1.90927	-	-	-	-	-	-
Liver-specific A compartments	3	80180000	80200000	1.38389	-0.636255	2.02014	-	-	-	-	-	-
Liver-specific A compartments	3	80200000	80220000	1.5555	-0.659832	2.21534	-	-	-	-	-	-
Liver-specific A compartments	3	80620000	80640000	1.01552	-0.425839	1.44136	ENSSSCG00000008384	C2ORF74	0.13	1.62	-3.80172	0.000232129
Liver-specific A compartments	3	80640000	80660000	0.823755	-0.407601	1.23136	-	-	-	-	-	-
Liver-specific A compartments	3	80660000	80680000	0.778376	-0.409481	1.18786	-	-	-	-	-	-
Liver-specific A compartments	3	80680000	80700000	0.623405	-0.517786	1.14119	-	-	-	-	-	-
Liver-specific A compartments	3	80700000	80720000	0.582899	-0.566004	1.1489	-	-	-	-	-	-
Liver-specific A compartments	3	80720000	80740000	0.653199	-0.452101	1.1053	-	-	-	-	-	-
Liver-specific A compartments	3	80760000	80780000	0.50142	-0.465984	0.967404	-	-	-	-	-	-
Liver-specific A compartments	3	80780000	80800000	0.476062	-0.208272	0.684334	ENSSSCG00000008385;ENSSSCG00000008387	PUS10;PEX13	30.29;107.14	24;42.02	0.320140971824014;1.25493349124278	0.0142352701282594;9.2728643513288e-10
Liver-specific A compartments	3	80900000	80920000	0.585468	-0.333474	0.918942	ENSSSCG00000008388	REL	12.31	6.27	0.995081	6.22756e-06
Liver-specific A compartments	3	80920000	80940000	0.409026	-1.06163	1.47065	ENSSSCG00000049840	Unknown	0.45	2.89	-2.69556	7.41662e-17
Liver-specific A compartments	3	80940000	80960000	0.313376	-1.45008	1.76345	-	-	-	-	-	-
Liver-specific A compartments	3	86080000	86100000	0.550595	-0.145465	0.69606	-	-	-	-	-	-
Liver-specific A compartments	3	86100000	86120000	0.47918	-0.264485	0.743664	-	-	-	-	-	-
Liver-specific A compartments	3	86120000	86140000	0.455433	-0.426235	0.881668	-	-	-	-	-	-
Liver-specific A compartments	3	86260000	86280000	0.50439	-0.218306	0.722695	-	-	-	-	-	-
Liver-specific A compartments	3	86280000	86300000	0.396582	-0.573976	0.970558	-	-	-	-	-	-
Liver-specific A compartments	3	86920000	86940000	0.322859	-0.275831	0.59869	ENSSSCG00000008410	C2ORF73	0.34	1.78	-2.13078	0.000433356
Liver-specific A compartments	3	86940000	86960000	0.37435	-0.301318	0.675667	-	-	-	-	-	-
Liver-specific A compartments	3	86960000	86980000	0.344126	-0.393146	0.737272	-	-	-	-	-	-
Liver-specific A compartments	3	86980000	87000000	0.292053	-0.407097	0.69915	-	-	-	-	-	-
Liver-specific A compartments	3	87000000	87020000	0.429161	-0.24036	0.669521	-	-	-	-	-	-
Liver-specific A compartments	3	87060000	87080000	0.489671	-0.272099	0.76177	-	-	-	-	-	-
Liver-specific A compartments	3	87120000	87140000	0.345723	-0.761405	1.10713	ENSSSCG00000047389	Unknown	0.37	0.79	-1.06674	0.195356
Liver-specific A compartments	3	87160000	87180000	0.280117	-1.30704	1.58716	-	-	-	-	-	-
Liver-specific A compartments	3	87180000	87200000	0.444544	-1.14602	1.59056	-	-	-	-	-	-
Liver-specific A compartments	3	87200000	87220000	0.544008	-0.812206	1.35621	-	-	-	-	-	-
Liver-specific A compartments	3	94940000	94960000	0.404795	-0.386571	0.791366	-	-	-	-	-	-
Liver-specific A compartments	3	94960000	94980000	0.31869	-0.459244	0.777934	-	-	-	-	-	-
Liver-specific A compartments	3	96120000	96140000	0.830631	-0.228142	1.05877	-	-	-	-	-	-
Liver-specific A compartments	3	96140000	96160000	1.09494	-0.360445	1.45538	-	-	-	-	-	-
Liver-specific A compartments	3	96160000	96180000	1.03734	-0.28481	1.32215	-	-	-	-	-	-
Liver-specific A compartments	3	96180000	96200000	1.29961	-0.405245	1.70485	-	-	-	-	-	-
Liver-specific A compartments	3	96200000	96220000	1.37303	-0.461969	1.835	ENSSSCG00000008449	SLC3A1	4.37	1.64	1.53847	0.000243954
Liver-specific A compartments	3	96340000	96360000	1.7099	-0.721807	2.43171	-	-	-	-	-	-
Liver-specific A compartments	3	96360000	96380000	1.7075	-0.572984	2.28049	-	-	-	-	-	-
Liver-specific A compartments	3	96380000	96400000	1.58954	-0.18558	1.77512	-	-	-	-	-	-
Liver-specific A compartments	3	96400000	96420000	1.39002	-0.448651	1.83867	-	-	-	-	-	-
Liver-specific A compartments	3	96420000	96440000	1.08209	-0.429743	1.51183	-	-	-	-	-	-
Liver-specific A compartments	3	96440000	96460000	1.32685	-0.364991	1.69184	-	-	-	-	-	-
Liver-specific A compartments	3	96600000	96620000	2.06718	-0.256683	2.32386	ENSSSCG00000008453;ENSSSCG00000035912	ABCG8;ABCG5	71.41;149.73	0.93;0.02	6.1957062204447;13.8157518416011	2.88452508225521e-92;6.90924322010888e-54
Liver-specific A compartments	3	96620000	96640000	1.88911	-0.386235	2.27535	ENSSSCG00000051675	Unknown	5.78	1.53	2.00132	2.13198e-08
Liver-specific A compartments	3	96640000	96660000	2.08888	-0.404456	2.49334	-	-	-	-	-	-
Liver-specific A compartments	3	97680000	97700000	1.3899	-0.390084	1.77998	-	-	-	-	-	-
Liver-specific A compartments	3	97720000	97740000	1.18618	-0.41929	1.60547	-	-	-	-	-	-
Liver-specific A compartments	3	97740000	97760000	1.19511	-0.427845	1.62296	-	-	-	-	-	-
Liver-specific A compartments	3	97840000	97860000	0.86552	-0.643039	1.50856	-	-	-	-	-	-
Liver-specific A compartments	3	97860000	97880000	0.825814	-0.855459	1.68127	-	-	-	-	-	-
Liver-specific A compartments	3	97880000	97900000	0.847063	-0.758732	1.60579	-	-	-	-	-	-
Liver-specific A compartments	3	97900000	97920000	0.912672	-0.495943	1.40862	-	-	-	-	-	-
Liver-specific A compartments	3	100780000	100800000	0.40791	-0.365558	0.773468	-	-	-	-	-	-
Liver-specific A compartments	3	100820000	100840000	0.840736	-0.399243	1.23998	ENSSSCG00000008474	Unknown	1.96	1.35	1.5076	0.382031
Liver-specific A compartments	3	100840000	100860000	0.945054	-0.31899	1.26404	-	-	-	-	-	-
Liver-specific A compartments	3	100860000	100880000	0.877097	-0.296724	1.17382	-	-	-	-	-	-
Liver-specific A compartments	3	101100000	101120000	1.40098	-0.254392	1.65537	-	-	-	-	-	-
Liver-specific A compartments	3	101120000	101140000	1.52686	-0.895077	2.42194	-	-	-	-	-	-
Liver-specific A compartments	3	101140000	101160000	1.65264	-0.900327	2.55296	-	-	-	-	-	-
Liver-specific A compartments	3	101160000	101180000	2.01384	-0.783951	2.7978	-	-	-	-	-	-
Liver-specific A compartments	3	101180000	101200000	2.13159	-0.312597	2.44419	-	-	-	-	-	-
Liver-specific A compartments	3	101400000	101420000	1.72558	-0.350685	2.07627	-	-	-	-	-	-
Liver-specific A compartments	3	101420000	101440000	1.75624	-0.449907	2.20615	-	-	-	-	-	-
Liver-specific A compartments	3	102080000	102100000	1.27635	-0.528288	1.80464	-	-	-	-	-	-
Liver-specific A compartments	3	102100000	102120000	1.17838	-0.74563	1.92401	-	-	-	-	-	-
Liver-specific A compartments	3	102120000	102140000	1.2998	-0.694269	1.99407	-	-	-	-	-	-
Liver-specific A compartments	3	102140000	102160000	1.2339	-0.604189	1.83809	-	-	-	-	-	-
Liver-specific A compartments	3	102160000	102180000	1.26303	-0.536962	1.79999	-	-	-	-	-	-
Liver-specific A compartments	3	102180000	102200000	1.20063	-0.38865	1.58928	ENSSSCG00000033844	CYP1B1	1.37	4.83	-2.02737	2.19957e-10
Liver-specific A compartments	3	102220000	102240000	1.15537	-0.569218	1.72459	-	-	-	-	-	-
Liver-specific A compartments	3	102240000	102260000	1.28694	-0.508268	1.7952	-	-	-	-	-	-
Liver-specific A compartments	3	102260000	102280000	1.31828	-0.512927	1.8312	-	-	-	-	-	-
Liver-specific A compartments	3	102280000	102300000	1.24695	-0.337567	1.58452	-	-	-	-	-	-
Liver-specific A compartments	3	102320000	102340000	0.355278	-0.481573	0.836852	-	-	-	-	-	-
Liver-specific A compartments	3	102780000	102800000	0.255315	-0.560007	0.815321	-	-	-	-	-	-
Liver-specific A compartments	3	106980000	107000000	0.824429	-0.384142	1.20857	ENSSSCG00000008512	TTC27	29.97	15.49	0.972945	2.03365e-06
Liver-specific A compartments	3	107360000	107380000	1.72147	-0.311396	2.03287	-	-	-	-	-	-
Liver-specific A compartments	3	107620000	107640000	0.562975	-0.293726	0.856702	-	-	-	-	-	-
Liver-specific A compartments	3	107640000	107660000	0.37808	-0.372931	0.751011	-	-	-	-	-	-
Liver-specific A compartments	3	114860000	114880000	1.13431	-0.312051	1.44637	-	-	-	-	-	-
Liver-specific A compartments	3	114880000	114900000	0.628425	-0.7616	1.39002	-	-	-	-	-	-
Liver-specific A compartments	3	114900000	114920000	0.393433	-0.575332	0.968764	-	-	-	-	-	-
Liver-specific A compartments	3	117600000	117620000	1.02985	-0.266576	1.29643	ENSSSCG00000030115	HS1BP3	41.48	11.42	1.7516	6.42671e-11
Liver-specific A compartments	3	118000000	118020000	2.616	-0.60401	3.22001	-	-	-	-	-	-
Liver-specific A compartments	3	118020000	118040000	2.41517	-0.875982	3.29115	-	-	-	-	-	-
Liver-specific A compartments	3	118040000	118060000	2.17821	-0.774821	2.95303	-	-	-	-	-	-
Liver-specific A compartments	3	118060000	118080000	1.94139	-1.03478	2.97617	-	-	-	-	-	-
Liver-specific A compartments	3	118080000	118100000	1.98745	-0.753239	2.74069	-	-	-	-	-	-
Liver-specific A compartments	3	118100000	118120000	1.91199	-0.265475	2.17747	-	-	-	-	-	-
Liver-specific A compartments	3	118240000	118260000	1.33359	-0.454961	1.78855	-	-	-	-	-	-
Liver-specific A compartments	3	121640000	121660000	0.405573	-1.61684	2.02241	-	-	-	-	-	-
Liver-specific A compartments	3	121660000	121680000	0.540947	-1.27482	1.81577	-	-	-	-	-	-
Liver-specific A compartments	3	121680000	121700000	0.745446	-1.2585	2.00394	-	-	-	-	-	-
Liver-specific A compartments	3	121700000	121720000	0.813039	-0.880883	1.69392	-	-	-	-	-	-
Liver-specific A compartments	3	121720000	121740000	0.50497	-0.910246	1.41522	-	-	-	-	-	-
Liver-specific A compartments	3	121740000	121760000	0.517519	-1.16013	1.67765	-	-	-	-	-	-
Liver-specific A compartments	3	121760000	121780000	0.532612	-1.02551	1.55812	-	-	-	-	-	-
Liver-specific A compartments	3	121780000	121800000	0.445232	-1.08789	1.53312	-	-	-	-	-	-
Liver-specific A compartments	3	121820000	121840000	0.465799	-0.565463	1.03126	-	-	-	-	-	-
Liver-specific A compartments	3	127980000	128000000	1.93424	-0.409792	2.34403	-	-	-	-	-	-
Liver-specific A compartments	3	128000000	128020000	1.85542	-0.469028	2.32445	-	-	-	-	-	-
Liver-specific A compartments	3	128020000	128040000	1.57335	-0.553741	2.12709	-	-	-	-	-	-
Liver-specific A compartments	3	128040000	128060000	1.50692	-0.506702	2.01363	-	-	-	-	-	-
Liver-specific A compartments	3	128060000	128080000	1.45229	-0.58198	2.03427	-	-	-	-	-	-
Liver-specific A compartments	3	128080000	128100000	1.24331	-0.581213	1.82453	-	-	-	-	-	-
Liver-specific A compartments	3	128100000	128120000	1.37327	-0.960066	2.33334	-	-	-	-	-	-
Liver-specific A compartments	3	128120000	128140000	1.24438	-1.19578	2.44016	-	-	-	-	-	-
Liver-specific A compartments	3	128140000	128160000	1.25323	-0.979911	2.23314	-	-	-	-	-	-
Liver-specific A compartments	3	128160000	128180000	1.2201	-0.969304	2.18941	-	-	-	-	-	-
Liver-specific A compartments	3	128180000	128200000	1.23142	-0.567909	1.79933	-	-	-	-	-	-
Liver-specific A compartments	3	128200000	128220000	1.47054	-0.868186	2.33873	-	-	-	-	-	-
Liver-specific A compartments	3	128220000	128240000	1.6491	-1.05422	2.70332	-	-	-	-	-	-
Liver-specific A compartments	3	128240000	128260000	1.14615	-0.701825	1.84797	-	-	-	-	-	-
Liver-specific A compartments	3	128260000	128280000	0.786297	-0.968041	1.75434	-	-	-	-	-	-
Liver-specific A compartments	3	128280000	128300000	0.779734	-0.840961	1.6207	-	-	-	-	-	-
Liver-specific A compartments	3	128300000	128320000	0.729019	-1.05167	1.78069	-	-	-	-	-	-
Liver-specific A compartments	3	128320000	128340000	0.661342	-0.91076	1.5721	-	-	-	-	-	-
Liver-specific A compartments	3	128340000	128360000	0.549497	-0.994005	1.5435	-	-	-	-	-	-
Liver-specific A compartments	3	128360000	128380000	0.393828	-1.23415	1.62797	-	-	-	-	-	-
Liver-specific A compartments	3	128380000	128400000	0.497835	-1.27922	1.77706	-	-	-	-	-	-
Liver-specific A compartments	3	128400000	128420000	0.438624	-1.47249	1.91111	-	-	-	-	-	-
Liver-specific A compartments	3	128420000	128440000	0.515626	-1.35058	1.86621	-	-	-	-	-	-
Liver-specific A compartments	3	128440000	128460000	0.495443	-1.37381	1.86925	-	-	-	-	-	-
Liver-specific A compartments	3	128460000	128480000	0.633866	-1.03171	1.66557	-	-	-	-	-	-
Liver-specific A compartments	3	128480000	128500000	0.623735	-0.536652	1.16039	-	-	-	-	-	-
Liver-specific A compartments	3	128500000	128520000	0.450468	-0.721212	1.17168	-	-	-	-	-	-
Liver-specific A compartments	3	128520000	128540000	0.447963	-1.03596	1.48392	-	-	-	-	-	-
Liver-specific A compartments	3	128540000	128560000	0.566024	-1.21263	1.77865	-	-	-	-	-	-
Liver-specific A compartments	3	128580000	128600000	0.53461	-1.28603	1.82064	-	-	-	-	-	-
Liver-specific A compartments	3	128600000	128620000	0.607235	-1.1295	1.73674	-	-	-	-	-	-
Liver-specific A compartments	3	128620000	128640000	0.518871	-1.20962	1.72849	-	-	-	-	-	-
Liver-specific A compartments	3	128640000	128660000	0.693632	-1.21986	1.91349	-	-	-	-	-	-
Liver-specific A compartments	3	128660000	128680000	0.540283	-1.2271	1.76738	-	-	-	-	-	-
Liver-specific A compartments	3	128680000	128700000	0.677803	-0.949147	1.62695	-	-	-	-	-	-
Liver-specific A compartments	3	128700000	128720000	0.735726	-0.601247	1.33697	-	-	-	-	-	-
Liver-specific A compartments	4	18180000	18200000	0.513177	-0.295224	0.8084	-	-	-	-	-	-
Liver-specific A compartments	4	18200000	18220000	0.579243	-0.629948	1.20919	-	-	-	-	-	-
Liver-specific A compartments	4	18220000	18240000	0.530146	-0.754803	1.28495	ENSSSCG00000013683	Unknown	1.42	0.17	2.4489	0.437389
Liver-specific A compartments	4	18240000	18260000	0.745938	-0.547761	1.2937	-	-	-	-	-	-
Liver-specific A compartments	4	18260000	18280000	0.979443	-0.413452	1.39289	-	-	-	-	-	-
Liver-specific A compartments	4	18420000	18440000	1.04022	-0.319731	1.35995	-	-	-	-	-	-
Liver-specific A compartments	4	18460000	18480000	1.02223	-0.345266	1.3675	-	-	-	-	-	-
Liver-specific A compartments	4	18480000	18500000	0.893966	-0.412074	1.30604	-	-	-	-	-	-
Liver-specific A compartments	4	18500000	18520000	0.708176	-0.453784	1.16196	-	-	-	-	-	-
Liver-specific A compartments	4	18520000	18540000	0.64455	-0.610601	1.25515	-	-	-	-	-	-
Liver-specific A compartments	4	18540000	18560000	0.807332	-0.40504	1.21237	-	-	-	-	-	-
Liver-specific A compartments	4	18560000	18580000	0.748487	-0.385322	1.13381	-	-	-	-	-	-
Liver-specific A compartments	4	18580000	18600000	0.779533	-0.327707	1.10724	-	-	-	-	-	-
Liver-specific A compartments	4	18640000	18660000	0.717372	-0.415559	1.13293	-	-	-	-	-	-
Liver-specific A compartments	4	18660000	18680000	0.746885	-0.60495	1.35184	-	-	-	-	-	-
Liver-specific A compartments	4	18760000	18780000	0.320398	-0.815518	1.13592	-	-	-	-	-	-
Liver-specific A compartments	4	18840000	18860000	0.384843	-0.986503	1.37135	-	-	-	-	-	-
Liver-specific A compartments	4	18860000	18880000	0.522608	-0.873385	1.39599	-	-	-	-	-	-
Liver-specific A compartments	4	18880000	18900000	0.575584	-0.590942	1.16653	-	-	-	-	-	-
Liver-specific A compartments	4	18900000	18920000	0.764349	-0.379663	1.14401	-	-	-	-	-	-
Liver-specific A compartments	4	19280000	19300000	1.04877	-0.345611	1.39438	-	-	-	-	-	-
Liver-specific A compartments	4	19300000	19320000	1.03019	-0.196877	1.22707	-	-	-	-	-	-
Liver-specific A compartments	4	19340000	19360000	0.867208	-0.39782	1.26503	-	-	-	-	-	-
Liver-specific A compartments	4	19360000	19380000	0.778719	-0.555881	1.3346	-	-	-	-	-	-
Liver-specific A compartments	4	19380000	19400000	0.796063	-0.700857	1.49692	-	-	-	-	-	-
Liver-specific A compartments	4	19400000	19420000	0.649636	-0.85392	1.50356	-	-	-	-	-	-
Liver-specific A compartments	4	19420000	19440000	0.529121	-0.731759	1.26088	-	-	-	-	-	-
Liver-specific A compartments	4	19440000	19460000	0.518715	-0.582126	1.10084	-	-	-	-	-	-
Liver-specific A compartments	4	36280000	36300000	2.74308	-0.3072	3.05028	-	-	-	-	-	-
Liver-specific A compartments	4	36900000	36920000	1.94668	-0.799816	2.7465	ENSSSCG00000031418	ATP6V0E1	0.32	0	-	-
Liver-specific A compartments	4	36920000	36940000	1.79885	-1.06788	2.86672	-	-	-	-	-	-
Liver-specific A compartments	4	36940000	36960000	1.69887	-1.01508	2.71395	-	-	-	-	-	-
Liver-specific A compartments	4	36960000	36980000	1.7018	-1.051	2.7528	-	-	-	-	-	-
Liver-specific A compartments	4	36980000	37000000	1.68346	-1.10453	2.78799	-	-	-	-	-	-
Liver-specific A compartments	4	37000000	37020000	1.87142	-1.01804	2.88945	-	-	-	-	-	-
Liver-specific A compartments	4	37020000	37040000	1.95417	-0.745735	2.6999	-	-	-	-	-	-
Liver-specific A compartments	4	37040000	37060000	2.26183	-0.419871	2.6817	-	-	-	-	-	-
Liver-specific A compartments	4	37220000	37240000	2.16071	-0.334573	2.49528	-	-	-	-	-	-
Liver-specific A compartments	4	37240000	37260000	2.19722	-0.31184	2.50906	-	-	-	-	-	-
Liver-specific A compartments	4	37280000	37300000	2.13238	-0.33852	2.4709	-	-	-	-	-	-
Liver-specific A compartments	4	37300000	37320000	2.03868	-0.383928	2.4226	-	-	-	-	-	-
Liver-specific A compartments	4	37320000	37340000	2.16298	-0.33088	2.49386	-	-	-	-	-	-
Liver-specific A compartments	4	37340000	37360000	2.00595	-0.217093	2.22305	-	-	-	-	-	-
Liver-specific A compartments	4	37360000	37380000	2.0571	-0.224485	2.28158	-	-	-	-	-	-
Liver-specific A compartments	4	37400000	37420000	2.16749	-0.378771	2.54626	-	-	-	-	-	-
Liver-specific A compartments	4	37420000	37440000	2.23494	-0.230284	2.46523	-	-	-	-	-	-
Liver-specific A compartments	4	37440000	37460000	2.16003	-0.260481	2.42051	-	-	-	-	-	-
Liver-specific A compartments	4	37460000	37480000	2.13598	-0.308319	2.4443	-	-	-	-	-	-
Liver-specific A compartments	4	37480000	37500000	2.12534	-0.316388	2.44173	-	-	-	-	-	-
Liver-specific A compartments	4	37500000	37520000	2.1925	-0.339376	2.53188	-	-	-	-	-	-
Liver-specific A compartments	4	37520000	37540000	2.25046	-0.330519	2.58098	-	-	-	-	-	-
Liver-specific A compartments	4	37540000	37560000	2.20655	-0.135921	2.34247	-	-	-	-	-	-
Liver-specific A compartments	4	37580000	37600000	2.25493	-0.303723	2.55865	-	-	-	-	-	-
Liver-specific A compartments	4	37600000	37620000	2.25693	-0.190532	2.44746	-	-	-	-	-	-
Liver-specific A compartments	4	37660000	37680000	2.40396	-0.252623	2.65658	-	-	-	-	-	-
Liver-specific A compartments	4	37760000	37780000	2.50258	-0.256038	2.75862	-	-	-	-	-	-
Liver-specific A compartments	4	37840000	37860000	2.27274	-0.365725	2.63846	-	-	-	-	-	-
Liver-specific A compartments	4	37920000	37940000	2.30928	-0.495382	2.80466	-	-	-	-	-	-
Liver-specific A compartments	4	37940000	37960000	2.36743	-0.454566	2.822	ENSSSCG00000006074	STK3	52.89	5.98	3.13926	2.01002e-45
Liver-specific A compartments	4	37960000	37980000	2.48	-0.442286	2.92228	-	-	-	-	-	-
Liver-specific A compartments	4	38040000	38060000	2.71248	-0.538258	3.25073	-	-	-	-	-	-
Liver-specific A compartments	4	38060000	38080000	2.65273	-0.53582	3.18856	-	-	-	-	-	-
Liver-specific A compartments	4	38080000	38100000	2.75507	-0.352115	3.10718	-	-	-	-	-	-
Liver-specific A compartments	4	38100000	38120000	2.50911	-0.206931	2.71604	-	-	-	-	-	-
Liver-specific A compartments	4	38120000	38140000	2.41084	-0.418122	2.82896	-	-	-	-	-	-
Liver-specific A compartments	4	38140000	38160000	2.55242	-0.451432	3.00386	-	-	-	-	-	-
Liver-specific A compartments	4	38160000	38180000	2.68904	-0.418514	3.10755	-	-	-	-	-	-
Liver-specific A compartments	4	38180000	38200000	2.50957	-0.324216	2.83379	-	-	-	-	-	-
Liver-specific A compartments	4	38240000	38260000	2.39615	-0.34625	2.7424	-	-	-	-	-	-
Liver-specific A compartments	4	38260000	38280000	2.45328	-0.397623	2.8509	-	-	-	-	-	-
Liver-specific A compartments	4	38300000	38320000	2.2239	-0.489788	2.71369	-	-	-	-	-	-
Liver-specific A compartments	4	38320000	38340000	2.12131	-0.982703	3.10401	-	-	-	-	-	-
Liver-specific A compartments	4	38340000	38360000	2.0795	-0.971707	3.05121	-	-	-	-	-	-
Liver-specific A compartments	4	38360000	38380000	2.15357	-0.733827	2.88739	ENSSSCG00000031917	KCNS2	0.08	27.81	-8.88124	3.0894e-90
Liver-specific A compartments	4	38380000	38400000	2.32616	-0.913107	3.23927	-	-	-	-	-	-
Liver-specific A compartments	4	38400000	38420000	2.43206	-0.801127	3.23318	-	-	-	-	-	-
Liver-specific A compartments	4	38420000	38440000	2.35571	-0.780071	3.13578	-	-	-	-	-	-
Liver-specific A compartments	4	38440000	38460000	2.24827	-0.808519	3.05678	-	-	-	-	-	-
Liver-specific A compartments	4	38460000	38480000	2.04704	-0.715692	2.76274	-	-	-	-	-	-
Liver-specific A compartments	4	38480000	38500000	2.29821	-0.571741	2.86995	ENSSSCG00000031267	NIPAL2	28.27	13.37	1.04914	4.75999e-12
Liver-specific A compartments	4	38500000	38520000	2.12083	-0.914509	3.03533	-	-	-	-	-	-
Liver-specific A compartments	4	38520000	38540000	2.21401	-1.02776	3.24178	-	-	-	-	-	-
Liver-specific A compartments	4	38540000	38560000	2.31567	-0.693142	3.00881	-	-	-	-	-	-
Liver-specific A compartments	4	38560000	38580000	2.38994	-0.624126	3.01407	-	-	-	-	-	-
Liver-specific A compartments	4	38780000	38800000	2.21084	-0.407296	2.61813	-	-	-	-	-	-
Liver-specific A compartments	4	38800000	38820000	2.15962	-0.574851	2.73447	-	-	-	-	-	-
Liver-specific A compartments	4	38820000	38840000	2.17488	-0.529777	2.70466	-	-	-	-	-	-
Liver-specific A compartments	4	38840000	38860000	2.15883	-0.368202	2.52703	-	-	-	-	-	-
Liver-specific A compartments	4	38860000	38880000	2.2425	-0.264772	2.50727	-	-	-	-	-	-
Liver-specific A compartments	4	38880000	38900000	2.29528	-0.187972	2.48325	-	-	-	-	-	-
Liver-specific A compartments	4	39200000	39220000	1.76293	-0.325545	2.08848	-	-	-	-	-	-
Liver-specific A compartments	4	39220000	39240000	1.62283	-0.400248	2.02308	-	-	-	-	-	-
Liver-specific A compartments	4	39240000	39260000	1.51259	-0.406486	1.91908	-	-	-	-	-	-
Liver-specific A compartments	4	39260000	39280000	1.3619	-0.357178	1.71908	-	-	-	-	-	-
Liver-specific A compartments	4	39280000	39300000	1.31025	-0.260731	1.57098	-	-	-	-	-	-
Liver-specific A compartments	4	39300000	39320000	1.32411	-0.339166	1.66327	-	-	-	-	-	-
Liver-specific A compartments	4	39320000	39340000	1.30959	-0.318471	1.62806	-	-	-	-	-	-
Liver-specific A compartments	4	39440000	39460000	1.38726	-0.378475	1.76573	-	-	-	-	-	-
Liver-specific A compartments	4	39460000	39480000	1.18994	-0.502615	1.69256	-	-	-	-	-	-
Liver-specific A compartments	4	39480000	39500000	0.934487	-0.585061	1.51955	-	-	-	-	-	-
Liver-specific A compartments	4	39500000	39520000	0.93216	-0.449804	1.38196	-	-	-	-	-	-
Liver-specific A compartments	4	39520000	39540000	0.892182	-0.388763	1.28095	-	-	-	-	-	-
Liver-specific A compartments	4	39540000	39560000	0.910816	-0.282708	1.19352	-	-	-	-	-	-
Liver-specific A compartments	4	39560000	39580000	0.970906	-0.478765	1.44967	-	-	-	-	-	-
Liver-specific A compartments	4	39580000	39600000	0.829336	-0.371941	1.20128	-	-	-	-	-	-
Liver-specific A compartments	4	39600000	39620000	0.839145	-0.244665	1.08381	-	-	-	-	-	-
Liver-specific A compartments	4	39700000	39720000	0.825898	-0.340071	1.16597	-	-	-	-	-	-
Liver-specific A compartments	4	39720000	39740000	0.695066	-0.488732	1.1838	-	-	-	-	-	-
Liver-specific A compartments	4	39740000	39760000	0.550736	-0.502961	1.0537	-	-	-	-	-	-
Liver-specific A compartments	4	39760000	39780000	0.605765	-0.682789	1.28855	-	-	-	-	-	-
Liver-specific A compartments	4	39780000	39800000	0.584059	-0.521079	1.10514	-	-	-	-	-	-
Liver-specific A compartments	4	39800000	39820000	0.697577	-0.45405	1.15163	-	-	-	-	-	-
Liver-specific A compartments	4	39820000	39840000	0.652034	-0.594415	1.24645	-	-	-	-	-	-
Liver-specific A compartments	4	39840000	39860000	0.579495	-0.687649	1.26714	-	-	-	-	-	-
Liver-specific A compartments	4	39860000	39880000	0.578972	-0.527473	1.10644	-	-	-	-	-	-
Liver-specific A compartments	4	39880000	39900000	0.60727	-0.480142	1.08741	-	-	-	-	-	-
Liver-specific A compartments	4	39900000	39920000	0.573997	-0.300814	0.874811	-	-	-	-	-	-
Liver-specific A compartments	4	39980000	40000000	0.807453	-0.324179	1.13163	-	-	-	-	-	-
Liver-specific A compartments	4	40000000	40020000	0.829612	-0.278794	1.10841	-	-	-	-	-	-
Liver-specific A compartments	4	40020000	40040000	0.924721	-0.264929	1.18965	-	-	-	-	-	-
Liver-specific A compartments	4	40040000	40060000	0.875077	-0.229595	1.10467	-	-	-	-	-	-
Liver-specific A compartments	4	40140000	40160000	0.955177	-0.279168	1.23435	-	-	-	-	-	-
Liver-specific A compartments	4	40160000	40180000	0.95275	-0.524785	1.47753	-	-	-	-	-	-
Liver-specific A compartments	4	40180000	40200000	1.06124	-0.471412	1.53265	-	-	-	-	-	-
Liver-specific A compartments	4	40200000	40220000	1.09747	-0.522424	1.61989	-	-	-	-	-	-
Liver-specific A compartments	4	40220000	40240000	1.15993	-0.292484	1.45241	-	-	-	-	-	-
Liver-specific A compartments	4	40420000	40440000	0.480964	-0.402795	0.883759	-	-	-	-	-	-
Liver-specific A compartments	4	41440000	41460000	1.20055	-0.332756	1.53331	-	-	-	-	-	-
Liver-specific A compartments	4	41460000	41480000	1.06977	-0.481794	1.55157	-	-	-	-	-	-
Liver-specific A compartments	4	41900000	41920000	1.23585	-0.120155	1.35601	-	-	-	-	-	-
Liver-specific A compartments	4	42100000	42120000	0.381525	-0.508712	0.890237	-	-	-	-	-	-
Liver-specific A compartments	4	50320000	50340000	0.550602	-0.634329	1.18493	-	-	-	-	-	-
Liver-specific A compartments	4	50340000	50360000	0.734486	-0.530002	1.26449	ENSSSCG00000006135;ENSSSCG00000006136	CPNE3;RMDN1	110.46;74.71	26.51;17.46	2.00377850178888;2.07981746171336	3.35512269708637e-31;3.10898220335066e-20
Liver-specific A compartments	4	50360000	50380000	0.734951	-0.863582	1.59853	-	-	-	-	-	-
Liver-specific A compartments	4	50380000	50400000	0.890628	-0.88832	1.77895	-	-	-	-	-	-
Liver-specific A compartments	4	50400000	50420000	0.966475	-1.00525	1.97173	-	-	-	-	-	-
Liver-specific A compartments	4	50420000	50440000	0.878101	-0.774443	1.65254	-	-	-	-	-	-
Liver-specific A compartments	4	50440000	50460000	0.984328	-1.0027	1.98703	-	-	-	-	-	-
Liver-specific A compartments	4	50460000	50480000	0.892405	-1.06462	1.95703	ENSSSCG00000046388	Unknown	0.15	0	-	-
Liver-specific A compartments	4	50480000	50500000	0.77597	-0.822776	1.59875	-	-	-	-	-	-
Liver-specific A compartments	4	50500000	50520000	0.670475	-0.673682	1.34416	ENSSSCG00000006137	WWP1	111.21	63.62	0.741306	0.000239032
Liver-specific A compartments	4	55660000	55680000	0.383641	-1.09183	1.47547	-	-	-	-	-	-
Liver-specific A compartments	4	55680000	55700000	0.605834	-1.08122	1.68706	-	-	-	-	-	-
Liver-specific A compartments	4	55700000	55720000	0.857372	-0.270979	1.12835	-	-	-	-	-	-
Liver-specific A compartments	4	55720000	55740000	0.847994	-0.457319	1.30531	ENSSSCG00000022989	ZNF704	3.23	15.23	-2.16042	1.59462e-22
Liver-specific A compartments	4	55740000	55760000	0.495914	-0.498529	0.994443	-	-	-	-	-	-
Liver-specific A compartments	4	56080000	56100000	0.321541	-0.894115	1.21566	-	-	-	-	-	-
Liver-specific A compartments	4	56120000	56140000	0.345061	-1.01528	1.36034	-	-	-	-	-	-
Liver-specific A compartments	4	56140000	56160000	0.51839	-0.532834	1.05122	-	-	-	-	-	-
Liver-specific A compartments	4	56420000	56440000	0.326493	-0.839204	1.1657	-	-	-	-	-	-
Liver-specific A compartments	4	56440000	56460000	0.395103	-0.569573	0.964676	-	-	-	-	-	-
Liver-specific A compartments	4	56460000	56480000	0.749968	-0.273494	1.02346	ENSSSCG00000006156	TPD52	57.81	68.62	-0.245559	0.438731
Liver-specific A compartments	4	56500000	56520000	0.590777	-0.354909	0.945687	-	-	-	-	-	-
Liver-specific A compartments	4	56520000	56540000	0.458316	-0.3511	0.809416	-	-	-	-	-	-
Liver-specific A compartments	4	61920000	61940000	0.553327	-1.05605	1.60938	-	-	-	-	-	-
Liver-specific A compartments	4	61940000	61960000	1.18285	-0.536398	1.71925	ENSSSCG00000006175	LY96	119.86	7.28	4.10912	2.18255e-16
Liver-specific A compartments	4	61980000	62000000	1.35783	-0.36896	1.72679	-	-	-	-	-	-
Liver-specific A compartments	4	62040000	62060000	1.36195	-0.358034	1.71999	-	-	-	-	-	-
Liver-specific A compartments	4	62060000	62080000	1.21741	-0.442952	1.66036	-	-	-	-	-	-
Liver-specific A compartments	4	62080000	62100000	1.02475	-0.52413	1.54888	-	-	-	-	-	-
Liver-specific A compartments	4	62100000	62120000	0.852396	-0.513056	1.36545	-	-	-	-	-	-
Liver-specific A compartments	4	62580000	62600000	0.590939	-0.532444	1.12338	-	-	-	-	-	-
Liver-specific A compartments	4	64700000	64720000	0.552692	-0.699388	1.25208	ENSSSCG00000006191;ENSSSCG00000006192	XKR9;LACTB2	39.51;556.44	0.7;16.62	5.89982085519221;4.9473060741769	1.8631750141756e-52;2.52949146734773e-42
Liver-specific A compartments	4	64720000	64740000	0.897017	-0.919746	1.81676	-	-	-	-	-	-
Liver-specific A compartments	4	64740000	64760000	1.16395	-0.901713	2.06566	ENSSSCG00000006193	TRAM1	471.51	35.35	3.76691	3.06256e-52
Liver-specific A compartments	4	64780000	64800000	1.67619	-0.535149	2.21134	-	-	-	-	-	-
Liver-specific A compartments	4	64800000	64820000	1.35519	-0.709478	2.06467	-	-	-	-	-	-
Liver-specific A compartments	4	64820000	64840000	1.10255	-0.612931	1.71548	-	-	-	-	-	-
Liver-specific A compartments	4	64840000	64860000	0.937363	-1.38752	2.32489	-	-	-	-	-	-
Liver-specific A compartments	4	64860000	64880000	1.16914	-1.5215	2.69063	-	-	-	-	-	-
Liver-specific A compartments	4	64880000	64900000	1.46703	-1.56091	3.02793	-	-	-	-	-	-
Liver-specific A compartments	4	64900000	64920000	1.47259	-1.38828	2.86087	-	-	-	-	-	-
Liver-specific A compartments	4	64920000	64940000	1.76933	-0.965637	2.73497	-	-	-	-	-	-
Liver-specific A compartments	4	65220000	65240000	0.796258	-0.621781	1.41804	-	-	-	-	-	-
Liver-specific A compartments	4	67460000	67480000	0.804755	-0.382057	1.18681	ENSSSCG00000006201	ARFGEF1	58	57.84	0.0692158	0.714543
Liver-specific A compartments	4	67480000	67500000	0.894431	-0.489634	1.38406	-	-	-	-	-	-
Liver-specific A compartments	4	67500000	67520000	0.901401	-0.527864	1.42926	-	-	-	-	-	-
Liver-specific A compartments	4	67520000	67540000	0.891468	-0.669729	1.5612	-	-	-	-	-	-
Liver-specific A compartments	4	67540000	67560000	0.964139	-0.652282	1.61642	-	-	-	-	-	-
Liver-specific A compartments	4	67560000	67580000	0.869862	-0.600496	1.47036	-	-	-	-	-	-
Liver-specific A compartments	4	67580000	67600000	0.908299	-0.595266	1.50357	-	-	-	-	-	-
Liver-specific A compartments	4	67600000	67620000	0.766763	-0.65263	1.41939	-	-	-	-	-	-
Liver-specific A compartments	4	67620000	67640000	0.629394	-0.722683	1.35208	-	-	-	-	-	-
Liver-specific A compartments	4	67640000	67660000	0.755805	-0.642676	1.39848	-	-	-	-	-	-
Liver-specific A compartments	4	67660000	67680000	0.576863	-0.7478	1.32466	-	-	-	-	-	-
Liver-specific A compartments	4	67680000	67700000	0.601033	-0.777925	1.37896	-	-	-	-	-	-
Liver-specific A compartments	4	67700000	67720000	0.864127	-0.500892	1.36502	-	-	-	-	-	-
Liver-specific A compartments	4	67760000	67780000	0.862347	-0.307985	1.17033	ENSSSCG00000006204	PPP1R42	0.23	1.14	-2.22783	0.00121837
Liver-specific A compartments	4	67780000	67800000	0.558225	-1.01898	1.57721	-	-	-	-	-	-
Liver-specific A compartments	4	67800000	67820000	0.561721	-0.895088	1.45681	ENSSSCG00000049935	TCF24	0.35	0.32	-	-
Liver-specific A compartments	4	67820000	67840000	0.663307	-0.579153	1.24246	-	-	-	-	-	-
Liver-specific A compartments	4	67860000	67880000	0.556633	-0.571671	1.1283	-	-	-	-	-	-
Liver-specific A compartments	4	67880000	67900000	0.770752	-0.832536	1.60329	ENSSSCG00000006205	MCMDC2	2.58	1.16	1.24243	7.77408e-06
Liver-specific A compartments	4	67900000	67920000	0.795416	-0.82466	1.62008	-	-	-	-	-	-
Liver-specific A compartments	4	67920000	67940000	0.855074	-0.612746	1.46782	-	-	-	-	-	-
Liver-specific A compartments	4	67940000	67960000	0.924862	-0.504292	1.42915	-	-	-	-	-	-
Liver-specific A compartments	4	67980000	68000000	1.32748	-0.329433	1.65692	-	-	-	-	-	-
Liver-specific A compartments	4	68000000	68020000	1.49314	-0.384997	1.87814	-	-	-	-	-	-
Liver-specific A compartments	4	68940000	68960000	0.520213	-0.787764	1.30798	-	-	-	-	-	-
Liver-specific A compartments	4	68980000	69000000	0.543759	-0.509587	1.05335	ENSSSCG00000006220	ARMC1	89.15	61.27	0.57365	0.0238335
Liver-specific A compartments	4	69620000	69640000	0.391721	-0.887933	1.27965	-	-	-	-	-	-
Liver-specific A compartments	4	69640000	69660000	0.28702	-0.9031	1.19012	-	-	-	-	-	-
Liver-specific A compartments	4	69660000	69680000	0.226874	-1.03345	1.26033	-	-	-	-	-	-
Liver-specific A compartments	4	70900000	70920000	0.864403	-0.299128	1.16353	-	-	-	-	-	-
Liver-specific A compartments	4	70960000	70980000	1.20406	-0.366284	1.57034	ENSSSCG00000037637	GGH	750.5	45.31	3.97041	1.31619e-37
Liver-specific A compartments	4	71000000	71020000	0.962446	-0.529442	1.49189	-	-	-	-	-	-
Liver-specific A compartments	4	71020000	71040000	0.424345	-0.427327	0.851672	-	-	-	-	-	-
Liver-specific A compartments	4	71880000	71900000	0.401779	-0.550007	0.951785	-	-	-	-	-	-
Liver-specific A compartments	4	71920000	71940000	0.785672	-0.501376	1.28705	-	-	-	-	-	-
Liver-specific A compartments	4	71940000	71960000	0.563694	-0.480102	1.0438	-	-	-	-	-	-
Liver-specific A compartments	4	71960000	71980000	0.452929	-0.582475	1.0354	-	-	-	-	-	-
Liver-specific A compartments	4	75780000	75800000	1.00742	-0.384491	1.39191	-	-	-	-	-	-
Liver-specific A compartments	4	75800000	75820000	1.53819	-0.521635	2.05983	-	-	-	-	-	-
Liver-specific A compartments	4	75820000	75840000	1.97938	-0.427323	2.40671	-	-	-	-	-	-
Liver-specific A compartments	4	77040000	77060000	0.530387	-0.52611	1.0565	-	-	-	-	-	-
Liver-specific A compartments	4	79800000	79820000	2.76119	-0.367649	3.12884	-	-	-	-	-	-
Liver-specific A compartments	4	79820000	79840000	2.73012	-0.496573	3.2267	-	-	-	-	-	-
Liver-specific A compartments	4	79840000	79860000	2.77236	-0.622619	3.39498	-	-	-	-	-	-
Liver-specific A compartments	4	79880000	79900000	2.97365	-0.325995	3.29965	-	-	-	-	-	-
Liver-specific A compartments	4	79900000	79920000	2.88172	-0.683055	3.56477	-	-	-	-	-	-
Liver-specific A compartments	4	79920000	79940000	2.9892	-0.550111	3.53931	-	-	-	-	-	-
Liver-specific A compartments	4	79940000	79960000	2.95952	-0.598471	3.55799	-	-	-	-	-	-
Liver-specific A compartments	4	79960000	79980000	2.79514	-0.696804	3.49194	-	-	-	-	-	-
Liver-specific A compartments	4	79980000	80000000	2.80165	-0.810911	3.61256	-	-	-	-	-	-
Liver-specific A compartments	4	80000000	80020000	2.86361	-0.461038	3.32465	-	-	-	-	-	-
Liver-specific A compartments	4	80020000	80040000	2.88714	-0.669125	3.55627	-	-	-	-	-	-
Liver-specific A compartments	4	80040000	80060000	2.71788	-0.829782	3.54766	-	-	-	-	-	-
Liver-specific A compartments	4	80060000	80080000	2.78671	-0.879826	3.66654	-	-	-	-	-	-
Liver-specific A compartments	4	80080000	80100000	2.65538	-0.971292	3.62667	-	-	-	-	-	-
Liver-specific A compartments	4	80100000	80120000	2.78134	-0.92319	3.70453	-	-	-	-	-	-
Liver-specific A compartments	4	80120000	80140000	2.69933	-0.654654	3.35398	-	-	-	-	-	-
Liver-specific A compartments	4	80140000	80160000	2.60977	-0.367289	2.97706	-	-	-	-	-	-
Liver-specific A compartments	4	80160000	80180000	2.52711	-0.478077	3.00519	-	-	-	-	-	-
Liver-specific A compartments	4	80200000	80220000	2.29474	-0.327026	2.62176	-	-	-	-	-	-
Liver-specific A compartments	4	80220000	80240000	2.04164	-0.280825	2.32247	-	-	-	-	-	-
Liver-specific A compartments	4	80240000	80260000	1.45639	-0.713476	2.16986	-	-	-	-	-	-
Liver-specific A compartments	4	80260000	80280000	0.968109	-1.16133	2.12944	-	-	-	-	-	-
Liver-specific A compartments	4	80280000	80300000	0.609409	-1.43997	2.04938	-	-	-	-	-	-
Liver-specific A compartments	4	80300000	80320000	0.407156	-1.15408	1.56124	-	-	-	-	-	-
Liver-specific A compartments	4	80320000	80340000	0.334963	-1.27427	1.60924	-	-	-	-	-	-
Liver-specific A compartments	4	80340000	80360000	0.343749	-1.42302	1.76677	-	-	-	-	-	-
Liver-specific A compartments	4	80360000	80380000	0.487509	-1.24234	1.72985	-	-	-	-	-	-
Liver-specific A compartments	4	80400000	80420000	0.396913	-1.29719	1.69411	-	-	-	-	-	-
Liver-specific A compartments	4	80420000	80440000	0.422154	-1.08531	1.50746	-	-	-	-	-	-
Liver-specific A compartments	4	80440000	80460000	0.606685	-0.731099	1.33778	-	-	-	-	-	-
Liver-specific A compartments	4	80460000	80480000	0.488064	-0.451021	0.939086	-	-	-	-	-	-
Liver-specific A compartments	4	80480000	80500000	0.439271	-0.458795	0.898066	-	-	-	-	-	-
Liver-specific A compartments	4	80500000	80520000	0.3594	-0.762438	1.12184	ENSSSCG00000031503	PRRX1	1.06	8.93	-3.03085	2.86144e-29
Liver-specific A compartments	4	80520000	80540000	0.404532	-1.23058	1.63511	-	-	-	-	-	-
Liver-specific A compartments	4	80540000	80560000	0.562776	-0.859534	1.42231	-	-	-	-	-	-
Liver-specific A compartments	4	80560000	80580000	0.891952	-0.463256	1.35521	-	-	-	-	-	-
Liver-specific A compartments	4	80600000	80620000	0.894652	-0.763631	1.65828	-	-	-	-	-	-
Liver-specific A compartments	4	80620000	80640000	0.434135	-1.16413	1.59827	-	-	-	-	-	-
Liver-specific A compartments	4	80920000	80940000	0.51765	-0.478279	0.995929	ENSSSCG00000006282	KIFAP3	52.37	284.58	-2.40642	6.54478e-28
Liver-specific A compartments	4	80940000	80960000	0.450831	-0.662928	1.11376	-	-	-	-	-	-
Liver-specific A compartments	4	80960000	80980000	0.254369	-1.00399	1.25836	-	-	-	-	-	-
Liver-specific A compartments	4	81000000	81020000	0.377608	-1.09808	1.47569	-	-	-	-	-	-
Liver-specific A compartments	4	81020000	81040000	0.413871	-1.01346	1.42733	-	-	-	-	-	-
Liver-specific A compartments	4	81040000	81060000	0.447583	-0.912232	1.35981	-	-	-	-	-	-
Liver-specific A compartments	4	81060000	81080000	0.562318	-0.811685	1.374	-	-	-	-	-	-
Liver-specific A compartments	4	81080000	81100000	0.857642	-0.462492	1.32013	-	-	-	-	-	-
Liver-specific A compartments	4	81100000	81120000	1.12102	-0.544587	1.6656	-	-	-	-	-	-
Liver-specific A compartments	4	81160000	81180000	2.02512	-0.261442	2.28656	-	-	-	-	-	-
Liver-specific A compartments	4	81180000	81200000	2.05393	-0.450817	2.50475	-	-	-	-	-	-
Liver-specific A compartments	4	81220000	81240000	1.95802	-0.69824	2.65626	ENSSSCG00000030960	SELE	1.01	0.51	1.25992	0.00337999
Liver-specific A compartments	4	81240000	81260000	1.77017	-1.07465	2.84482	-	-	-	-	-	-
Liver-specific A compartments	4	81260000	81280000	1.79552	-0.889963	2.68549	ENSSSCG00000034809	Unknown	0	0	-	-
Liver-specific A compartments	4	81280000	81300000	1.96115	-0.908521	2.86967	ENSSSCG00000006286	SELE	0.82	0.16	2.53111	0.000666862
Liver-specific A compartments	4	81300000	81320000	1.95173	-0.944056	2.89578	ENSSSCG00000006287	SELL	63.41	4.65	3.9111	3.15719e-13
Liver-specific A compartments	4	81320000	81340000	2.03451	-1.10298	3.13748	-	-	-	-	-	-
Liver-specific A compartments	4	81340000	81360000	2.01576	-0.859208	2.87497	-	-	-	-	-	-
Liver-specific A compartments	4	81360000	81380000	2.20073	-0.682241	2.88297	ENSSSCG00000006288	SELP	4.81	2.32	1.12725	0.000771334
Liver-specific A compartments	4	81380000	81400000	2.20825	-0.795494	3.00375	-	-	-	-	-	-
Liver-specific A compartments	4	81400000	81420000	2.19018	-0.546512	2.7367	ENSSSCG00000006289	F5	147.88	101.13	0.532682	0.228935
Liver-specific A compartments	4	81420000	81440000	2.0151	-0.484693	2.49979	-	-	-	-	-	-
Liver-specific A compartments	4	81440000	81460000	1.92383	-0.452599	2.37643	-	-	-	-	-	-
Liver-specific A compartments	4	81460000	81480000	1.84841	-0.919624	2.76803	-	-	-	-	-	-
Liver-specific A compartments	4	81480000	81500000	2.0997	-0.661726	2.76142	-	-	-	-	-	-
Liver-specific A compartments	4	81520000	81540000	1.95532	-0.564456	2.51977	-	-	-	-	-	-
Liver-specific A compartments	4	81540000	81560000	2.08326	-0.640431	2.72369	-	-	-	-	-	-
Liver-specific A compartments	4	81560000	81580000	2.05829	-0.682529	2.74082	ENSSSCG00000028804	CCDC181	15.37	13.61	0.13592	0.588944
Liver-specific A compartments	4	81580000	81600000	1.87115	-0.800837	2.67199	-	-	-	-	-	-
Liver-specific A compartments	4	81600000	81620000	1.97166	-0.603494	2.57515	-	-	-	-	-	-
Liver-specific A compartments	4	81640000	81660000	1.72685	-0.617426	2.34427	-	-	-	-	-	-
Liver-specific A compartments	4	81660000	81680000	1.43362	-1.22724	2.66086	-	-	-	-	-	-
Liver-specific A compartments	4	81680000	81700000	1.2547	-1.53482	2.78953	-	-	-	-	-	-
Liver-specific A compartments	4	81700000	81720000	1.14386	-1.75357	2.89743	-	-	-	-	-	-
Liver-specific A compartments	4	81720000	81740000	1.04603	-1.76429	2.81032	-	-	-	-	-	-
Liver-specific A compartments	4	81740000	81760000	0.986739	-1.84754	2.83428	-	-	-	-	-	-
Liver-specific A compartments	4	81760000	81780000	0.947067	-1.89728	2.84435	-	-	-	-	-	-
Liver-specific A compartments	4	81780000	81800000	0.961818	-1.77015	2.73196	-	-	-	-	-	-
Liver-specific A compartments	4	81800000	81820000	0.923629	-1.77031	2.69394	-	-	-	-	-	-
Liver-specific A compartments	4	81820000	81840000	1.07748	-1.67414	2.75162	-	-	-	-	-	-
Liver-specific A compartments	4	81840000	81860000	1.23598	-1.82479	3.06078	-	-	-	-	-	-
Liver-specific A compartments	4	81860000	81880000	1.40153	-1.80435	3.20588	-	-	-	-	-	-
Liver-specific A compartments	4	81880000	81900000	1.49416	-1.56302	3.05718	-	-	-	-	-	-
Liver-specific A compartments	4	81900000	81920000	1.67054	-1.19791	2.86844	-	-	-	-	-	-
Liver-specific A compartments	4	81920000	81940000	1.88382	-0.767002	2.65082	-	-	-	-	-	-
Liver-specific A compartments	4	81940000	81960000	1.66321	-1.1219	2.78511	-	-	-	-	-	-
Liver-specific A compartments	4	81960000	81980000	1.5503	-1.59099	3.14128	-	-	-	-	-	-
Liver-specific A compartments	4	81980000	82000000	1.53581	-1.63927	3.17508	ENSSSCG00000006296	ATP1B1	245.39	796.75	-1.72412	3.81736e-09
Liver-specific A compartments	4	82000000	82020000	1.41882	-1.80303	3.22185	-	-	-	-	-	-
Liver-specific A compartments	4	82020000	82040000	1.33902	-1.87524	3.21426	-	-	-	-	-	-
Liver-specific A compartments	4	82040000	82060000	1.30962	-1.80159	3.11121	-	-	-	-	-	-
Liver-specific A compartments	4	82060000	82080000	1.32174	-1.68363	3.00537	-	-	-	-	-	-
Liver-specific A compartments	4	82080000	82100000	1.32682	-1.81078	3.1376	-	-	-	-	-	-
Liver-specific A compartments	4	82100000	82120000	1.44041	-1.74234	3.18275	-	-	-	-	-	-
Liver-specific A compartments	4	82120000	82140000	1.55403	-1.68585	3.23988	-	-	-	-	-	-
Liver-specific A compartments	4	82140000	82160000	1.43196	-1.65414	3.08609	-	-	-	-	-	-
Liver-specific A compartments	4	82160000	82180000	1.4756	-1.57866	3.05426	-	-	-	-	-	-
Liver-specific A compartments	4	82180000	82200000	1.47259	-1.84019	3.31278	-	-	-	-	-	-
Liver-specific A compartments	4	82200000	82220000	1.22522	-1.71327	2.9385	-	-	-	-	-	-
Liver-specific A compartments	4	82220000	82240000	1.17039	-1.79107	2.96145	-	-	-	-	-	-
Liver-specific A compartments	4	82240000	82260000	1.13784	-1.66312	2.80096	-	-	-	-	-	-
Liver-specific A compartments	4	82260000	82280000	1.0074	-1.69463	2.70203	-	-	-	-	-	-
Liver-specific A compartments	4	82280000	82300000	1.00977	-1.65001	2.65977	ENSSSCG00000035937	DPT	22.36	0.11	8.59372	5.94935e-25
Liver-specific A compartments	4	82300000	82320000	0.921842	-1.73291	2.65475	-	-	-	-	-	-
Liver-specific A compartments	4	82320000	82340000	0.938489	-1.77967	2.71816	-	-	-	-	-	-
Liver-specific A compartments	4	82340000	82360000	0.801969	-1.78912	2.59108	-	-	-	-	-	-
Liver-specific A compartments	4	82360000	82380000	0.807905	-1.81661	2.62452	-	-	-	-	-	-
Liver-specific A compartments	4	82380000	82400000	0.760633	-1.43742	2.19806	-	-	-	-	-	-
Liver-specific A compartments	4	82400000	82420000	0.667998	-1.78673	2.45473	ENSSSCG00000037962	Unknown	0	0	-	-
Liver-specific A compartments	4	82420000	82440000	0.770956	-1.82506	2.59602	ENSSSCG00000006298	XCL1	5.45	0.03	8.52532	7.29981e-12
Liver-specific A compartments	4	82440000	82460000	0.661897	-1.76914	2.43104	-	-	-	-	-	-
Liver-specific A compartments	4	82460000	82480000	0.870067	-1.68145	2.55151	-	-	-	-	-	-
Liver-specific A compartments	4	82480000	82500000	0.869308	-1.39265	2.26196	-	-	-	-	-	-
Liver-specific A compartments	4	82500000	82520000	0.968598	-1.15361	2.12221	-	-	-	-	-	-
Liver-specific A compartments	4	82520000	82540000	1.1222	-1.19153	2.31373	ENSSSCG00000046215	Unknown	0.96	2.49	-0.943478	0.0492807
Liver-specific A compartments	4	82540000	82560000	1.16513	-1.13491	2.30004	-	-	-	-	-	-
Liver-specific A compartments	4	82560000	82580000	1.19798	-1.43576	2.63374	-	-	-	-	-	-
Liver-specific A compartments	4	82580000	82600000	1.27011	-1.41522	2.68533	-	-	-	-	-	-
Liver-specific A compartments	4	82600000	82620000	1.29848	-1.33543	2.6339	-	-	-	-	-	-
Liver-specific A compartments	4	82620000	82640000	1.38208	-1.02052	2.4026	-	-	-	-	-	-
Liver-specific A compartments	4	82640000	82660000	1.39626	-1.47662	2.87289	-	-	-	-	-	-
Liver-specific A compartments	4	82660000	82680000	1.49354	-2.25871	3.75226	-	-	-	-	-	-
Liver-specific A compartments	4	82680000	82700000	1.55299	-1.86004	3.41303	ENSSSCG00000006299	TBX19	0.07	0.05	-	-
Liver-specific A compartments	4	82700000	82720000	1.96904	-1.412	3.38104	-	-	-	-	-	-
Liver-specific A compartments	4	82720000	82740000	2.33119	-0.828451	3.15964	ENSSSCG00000031617	SFT2D2	119.38	6.78	4.08783	6.4359e-98
Liver-specific A compartments	4	82740000	82760000	2.17021	-0.922124	3.09233	-	-	-	-	-	-
Liver-specific A compartments	4	82760000	82780000	2.30361	-0.619132	2.92274	-	-	-	-	-	-
Liver-specific A compartments	4	82800000	82820000	2.40222	-0.491793	2.89401	-	-	-	-	-	-
Liver-specific A compartments	4	82820000	82840000	2.06181	-0.51501	2.57682	-	-	-	-	-	-
Liver-specific A compartments	4	82840000	82860000	2.12565	-0.21242	2.33807	ENSSSCG00000006302	GPR161	1.5	9.6	-2.63068	4.77311e-38
Liver-specific A compartments	4	82860000	82880000	2.05641	-0.45567	2.51208	-	-	-	-	-	-
Liver-specific A compartments	4	82880000	82900000	2.16711	-0.494405	2.66151	-	-	-	-	-	-
Liver-specific A compartments	4	82920000	82940000	2.37716	-0.207224	2.58439	-	-	-	-	-	-
Liver-specific A compartments	4	82940000	82960000	2.36339	-0.312569	2.67596	-	-	-	-	-	-
Liver-specific A compartments	4	82960000	82980000	2.42559	-0.538506	2.9641	-	-	-	-	-	-
Liver-specific A compartments	4	82980000	83000000	2.63544	-0.33065	2.96609	-	-	-	-	-	-
Liver-specific A compartments	4	83000000	83020000	2.57958	-0.452636	3.03222	-	-	-	-	-	-
Liver-specific A compartments	4	83020000	83040000	2.62014	-0.327076	2.94722	-	-	-	-	-	-
Liver-specific A compartments	4	83080000	83100000	2.61009	-0.414188	3.02428	ENSSSCG00000006305	ADCY10	0.98	0.6	0.619556	0.263762
Liver-specific A compartments	4	83100000	83120000	2.25917	-0.787186	3.04635	-	-	-	-	-	-
Liver-specific A compartments	4	83120000	83140000	2.18122	-1.07006	3.25127	-	-	-	-	-	-
Liver-specific A compartments	4	83140000	83160000	1.98886	-1.38731	3.37617	-	-	-	-	-	-
Liver-specific A compartments	4	83160000	83180000	1.99946	-1.31571	3.31517	-	-	-	-	-	-
Liver-specific A compartments	4	83180000	83200000	2.03695	-0.911896	2.94884	-	-	-	-	-	-
Liver-specific A compartments	4	83200000	83220000	2.17463	-0.415024	2.58965	-	-	-	-	-	-
Liver-specific A compartments	4	83220000	83240000	2.26514	-0.53759	2.80273	-	-	-	-	-	-
Liver-specific A compartments	4	83240000	83260000	2.32776	-0.489642	2.8174	-	-	-	-	-	-
Liver-specific A compartments	4	83260000	83280000	2.36606	-0.275762	2.64182	-	-	-	-	-	-
Liver-specific A compartments	4	83360000	83380000	2.41103	-0.24576	2.65679	-	-	-	-	-	-
Liver-specific A compartments	4	83460000	83480000	1.32923	-0.474988	1.80422	-	-	-	-	-	-
Liver-specific A compartments	4	83480000	83500000	0.934379	-1.34572	2.2801	-	-	-	-	-	-
Liver-specific A compartments	4	83500000	83520000	0.899452	-1.75936	2.65881	-	-	-	-	-	-
Liver-specific A compartments	4	83520000	83540000	0.800226	-1.81552	2.61574	-	-	-	-	-	-
Liver-specific A compartments	4	83540000	83560000	0.749066	-1.40825	2.15732	-	-	-	-	-	-
Liver-specific A compartments	4	83560000	83580000	0.785367	-0.764558	1.54992	-	-	-	-	-	-
Liver-specific A compartments	4	83580000	83600000	0.761934	-0.439163	1.2011	-	-	-	-	-	-
Liver-specific A compartments	4	83600000	83620000	0.742471	-0.38966	1.13213	-	-	-	-	-	-
Liver-specific A compartments	4	83620000	83640000	0.626936	-0.359433	0.986369	-	-	-	-	-	-
Liver-specific A compartments	4	83640000	83660000	0.688756	-0.356672	1.04543	-	-	-	-	-	-
Liver-specific A compartments	4	83660000	83680000	0.658397	-0.440689	1.09909	-	-	-	-	-	-
Liver-specific A compartments	4	83780000	83800000	0.474073	-0.8656	1.33967	-	-	-	-	-	-
Liver-specific A compartments	4	84860000	84880000	0.488002	-0.691287	1.17929	-	-	-	-	-	-
Liver-specific A compartments	4	84880000	84900000	0.630525	-0.667689	1.29821	-	-	-	-	-	-
Liver-specific A compartments	4	84900000	84920000	0.767263	-0.510317	1.27758	ENSSSCG00000039867	UCK2	7.05	33.39	-2.17288	1.45018e-18
Liver-specific A compartments	4	84920000	84940000	0.600267	-0.919198	1.51946	-	-	-	-	-	-
Liver-specific A compartments	4	84940000	84960000	0.69329	-0.681611	1.3749	-	-	-	-	-	-
Liver-specific A compartments	4	84960000	84980000	0.953724	-0.555494	1.50922	ENSSSCG00000037314	TMCO1	170.97	62.84	1.45284	7.21716e-16
Liver-specific A compartments	4	84980000	85000000	0.863262	-0.579946	1.44321	-	-	-	-	-	-
Liver-specific A compartments	4	85000000	85020000	0.871384	-0.65427	1.52565	-	-	-	-	-	-
Liver-specific A compartments	4	85020000	85040000	1.24937	-0.39564	1.64501	ENSSSCG00000006324	Unknown	671.99	34.15	4.14974	3.88503e-50
Liver-specific A compartments	4	85040000	85060000	1.24812	-0.813837	2.06196	-	-	-	-	-	-
Liver-specific A compartments	4	85060000	85080000	1.04916	-0.845035	1.89419	-	-	-	-	-	-
Liver-specific A compartments	4	85080000	85100000	1.11167	-0.488547	1.60022	ENSSSCG00000006325	MGST3	401.83	185.71	1.07919	0.00166129
Liver-specific A compartments	4	85100000	85120000	0.53644	-1.44771	1.98415	-	-	-	-	-	-
Liver-specific A compartments	4	85940000	85960000	0.397715	-0.38572	0.783435	-	-	-	-	-	-
Liver-specific A compartments	4	85960000	85980000	0.532373	-0.370044	0.902417	-	-	-	-	-	-
Liver-specific A compartments	4	85980000	86000000	0.673299	-0.307681	0.980981	-	-	-	-	-	-
Liver-specific A compartments	4	86000000	86020000	0.687705	-0.380392	1.0681	-	-	-	-	-	-
Liver-specific A compartments	4	86020000	86040000	0.51984	-0.492456	1.0123	-	-	-	-	-	-
Liver-specific A compartments	4	87720000	87740000	0.896744	-0.89676	1.7935	-	-	-	-	-	-
Liver-specific A compartments	4	87740000	87760000	1.38675	-0.560858	1.94761	ENSSSCG00000006337	HSD17B7	273.7	53.26	2.37684	3.35705e-12
Liver-specific A compartments	4	87760000	87780000	1.17672	-0.751913	1.92863	-	-	-	-	-	-
Liver-specific A compartments	4	87780000	87800000	1.10186	-0.600616	1.70247	-	-	-	-	-	-
Liver-specific A compartments	4	87800000	87820000	0.949709	-0.993072	1.94278	-	-	-	-	-	-
Liver-specific A compartments	4	87820000	87840000	1.02914	-0.835082	1.86422	-	-	-	-	-	-
Liver-specific A compartments	4	87840000	87860000	1.05405	-0.805834	1.85988	-	-	-	-	-	-
Liver-specific A compartments	4	87860000	87880000	1.09069	-0.896022	1.98672	-	-	-	-	-	-
Liver-specific A compartments	4	87880000	87900000	1.18371	-0.684296	1.868	-	-	-	-	-	-
Liver-specific A compartments	4	87900000	87920000	1.27992	-0.875112	2.15504	ENSSSCG00000006338	DDR2	10.61	22.6	-1.06559	2.63073e-05
Liver-specific A compartments	4	87920000	87940000	1.14144	-1.00097	2.1424	-	-	-	-	-	-
Liver-specific A compartments	4	87940000	87960000	1.35215	-0.804085	2.15623	-	-	-	-	-	-
Liver-specific A compartments	4	87960000	87980000	1.73875	-0.576534	2.31528	-	-	-	-	-	-
Liver-specific A compartments	4	88000000	88020000	2.15931	-0.825269	2.98458	-	-	-	-	-	-
Liver-specific A compartments	4	88020000	88040000	2.28336	-0.671446	2.9548	-	-	-	-	-	-
Liver-specific A compartments	4	88040000	88060000	2.38044	-0.423515	2.80395	ENSSSCG00000006342	UHMK1	119.54	84.76	0.493686	0.0200736
Liver-specific A compartments	4	88060000	88080000	1.99244	-1.50903	3.50147	ENSSSCG00000046961	Unknown	1.19	0.11	4.696	0.0379913
Liver-specific A compartments	4	88080000	88100000	1.9109	-2.05929	3.97019	ENSSSCG00000032108	Unknown	2.13	1.59	0.584446	0.0536313
Liver-specific A compartments	4	88100000	88120000	1.85925	-1.78255	3.6418	-	-	-	-	-	-
Liver-specific A compartments	4	88120000	88140000	1.93014	-1.00891	2.93905	-	-	-	-	-	-
Liver-specific A compartments	4	88140000	88160000	2.03843	-0.848816	2.88725	ENSSSCG00000006343	SPATA46	0.24	0	-	-
Liver-specific A compartments	4	88160000	88180000	1.88835	-1.16954	3.05789	-	-	-	-	-	-
Liver-specific A compartments	4	88180000	88200000	1.85968	-1.20411	3.06379	-	-	-	-	-	-
Liver-specific A compartments	4	88200000	88220000	1.83584	-1.43769	3.27353	-	-	-	-	-	-
Liver-specific A compartments	4	88220000	88240000	1.74876	-1.39024	3.139	-	-	-	-	-	-
Liver-specific A compartments	4	88240000	88260000	1.68154	-1.2261	2.90764	-	-	-	-	-	-
Liver-specific A compartments	4	88260000	88280000	1.77475	-1.032	2.80675	-	-	-	-	-	-
Liver-specific A compartments	4	88280000	88300000	1.70322	-1.07432	2.77754	-	-	-	-	-	-
Liver-specific A compartments	4	88300000	88320000	1.75815	-0.895454	2.65361	-	-	-	-	-	-
Liver-specific A compartments	4	88320000	88340000	2.01321	-0.566926	2.58014	ENSSSCG00000045357	Unknown	0.04	0.52	-3.08195	0.0384948
Liver-specific A compartments	4	88340000	88360000	1.96769	-0.843148	2.81084	-	-	-	-	-	-
Liver-specific A compartments	4	88360000	88380000	2.05081	-0.760651	2.81146	-	-	-	-	-	-
Liver-specific A compartments	4	88380000	88400000	1.94592	-0.674942	2.62087	-	-	-	-	-	-
Liver-specific A compartments	4	88400000	88420000	2.02551	-1.17496	3.20048	-	-	-	-	-	-
Liver-specific A compartments	4	88420000	88440000	2.17948	-1.17787	3.35735	-	-	-	-	-	-
Liver-specific A compartments	4	88440000	88460000	2.21335	-0.915604	3.12896	-	-	-	-	-	-
Liver-specific A compartments	4	88460000	88480000	2.23919	-0.580387	2.81958	ENSSSCG00000006344	NOS1AP	8.8	17.24	-1.09767	4.58484e-09
Liver-specific A compartments	4	88480000	88500000	1.98142	-0.559547	2.54097	ENSSSCG00000049453	Unknown	0.36	0.87	-1.18983	0.0408524
Liver-specific A compartments	4	88500000	88520000	2.17043	-0.302059	2.47249	-	-	-	-	-	-
Liver-specific A compartments	4	88540000	88560000	2.38604	-0.309435	2.69547	-	-	-	-	-	-
Liver-specific A compartments	4	88560000	88580000	2.19795	-0.726151	2.9241	-	-	-	-	-	-
Liver-specific A compartments	4	88580000	88600000	2.39784	-0.716058	3.1139	-	-	-	-	-	-
Liver-specific A compartments	4	88600000	88620000	2.38839	-0.679765	3.06815	-	-	-	-	-	-
Liver-specific A compartments	4	88620000	88640000	2.35813	-0.801097	3.15923	-	-	-	-	-	-
Liver-specific A compartments	4	88640000	88660000	2.49981	-0.588612	3.08842	-	-	-	-	-	-
Liver-specific A compartments	4	88660000	88680000	2.6991	-0.562595	3.2617	-	-	-	-	-	-
Liver-specific A compartments	4	88680000	88700000	2.59869	-0.630569	3.22926	-	-	-	-	-	-
Liver-specific A compartments	4	88700000	88720000	2.61123	-0.380403	2.99163	-	-	-	-	-	-
Liver-specific A compartments	4	88720000	88740000	2.58515	-0.40122	2.98637	-	-	-	-	-	-
Liver-specific A compartments	4	88740000	88760000	2.7743	-0.38729	3.16159	-	-	-	-	-	-
Liver-specific A compartments	4	88760000	88780000	2.8253	-0.406017	3.23132	-	-	-	-	-	-
Liver-specific A compartments	4	88820000	88840000	2.96488	-0.589128	3.55401	ENSSSCG00000006347;ENSSSCG00000006348	DUSP12;FCRLB	18.59;0.05	9.37;0.01	0.996746919160012;-	1.4652121982893e-07;-
Liver-specific A compartments	4	88840000	88860000	2.74965	-1.43463	4.18429	ENSSSCG00000030246	FCRLA	1.34	0.11	4.39763	1.99702e-08
Liver-specific A compartments	4	88860000	88880000	2.89549	-1.5194	4.4149	-	-	-	-	-	-
Liver-specific A compartments	4	88880000	88900000	2.82911	-1.47754	4.30664	-	-	-	-	-	-
Liver-specific A compartments	4	88900000	88920000	2.76185	-1.67513	4.43698	-	-	-	-	-	-
Liver-specific A compartments	4	88920000	88940000	2.93777	-1.20677	4.14454	ENSSSCG00000043911	Unknown	0.58	0.46	0.675131	0.849402
Liver-specific A compartments	4	88940000	88960000	3.23222	-0.814027	4.04625	ENSSSCG00000036618	FCGR3B	258.22	34.6	2.93712	2.22291e-08
Liver-specific A compartments	4	88980000	89000000	3.02197	-1.10648	4.12846	ENSSSCG00000006350;ENSSSCG00000047932	FCGR2B;HSPA6	274.83;2.16	3.22;4.09	6.32439829162806;-0.808014009203156	6.79963092736711e-77;0.00512962680378217
Liver-specific A compartments	4	89000000	89020000	3.14634	-1.17713	4.32348	-	-	-	-	-	-
Liver-specific A compartments	4	89040000	89060000	2.99524	-2.27672	5.27196	ENSSSCG00000051708	Unknown	0.42	2.83	-2.83305	3.02096e-11
Liver-specific A compartments	4	89060000	89080000	2.23217	-0.455544	2.68771	-	-	-	-	-	-
Liver-specific A compartments	4	89440000	89460000	3.3585	-0.563715	3.92222	-	-	-	-	-	-
Liver-specific A compartments	4	89460000	89480000	2.93818	-1.15156	4.08973	-	-	-	-	-	-
Liver-specific A compartments	4	89480000	89500000	2.52907	-1.57069	4.09976	-	-	-	-	-	-
Liver-specific A compartments	4	89500000	89520000	2.45508	-1.48329	3.93837	ENSSSCG00000025885	ITLN2	1.09	2.75	-1.33468	2.08596e-05
Liver-specific A compartments	4	89520000	89540000	2.07007	-1.7119	3.78197	-	-	-	-	-	-
Liver-specific A compartments	4	89540000	89560000	1.99099	-1.61056	3.60155	-	-	-	-	-	-
Liver-specific A compartments	4	89560000	89580000	1.35626	-1.55169	2.90795	-	-	-	-	-	-
Liver-specific A compartments	4	89580000	89600000	1.16129	-1.02154	2.18282	-	-	-	-	-	-
Liver-specific A compartments	4	89600000	89620000	1.3543	-0.90688	2.26118	-	-	-	-	-	-
Liver-specific A compartments	4	89620000	89640000	1.8626	-1.72373	3.58633	-	-	-	-	-	-
Liver-specific A compartments	4	89640000	89660000	1.55614	-2.26566	3.8218	-	-	-	-	-	-
Liver-specific A compartments	4	89660000	89680000	1.55546	-2.43473	3.99019	ENSSSCG00000006374	CD244	7.02	0.16	5.28725	9.15801e-22
Liver-specific A compartments	4	89680000	89700000	1.48209	-2.16916	3.65125	-	-	-	-	-	-
Liver-specific A compartments	4	89700000	89720000	1.43137	-2.49986	3.93123	-	-	-	-	-	-
Liver-specific A compartments	4	89720000	89740000	1.42456	-2.29421	3.71878	ENSSSCG00000006375;ENSSSCG00000006376	LY9;Unknown	16.26;1.54	0.2;0.41	6.4496293992707;2.20165115355428	9.34125952636198e-31;0.000333885594997314
Liver-specific A compartments	4	89740000	89760000	1.22268	-2.31268	3.53535	-	-	-	-	-	-
Liver-specific A compartments	4	89760000	89780000	1.23388	-2.65489	3.88877	-	-	-	-	-	-
Liver-specific A compartments	4	89780000	89800000	1.17544	-2.65346	3.82891	ENSSSCG00000006378	SLAMF7	2.74	0.95	1.68568	1.39825e-09
Liver-specific A compartments	4	89800000	89820000	1.12736	-2.52241	3.64978	-	-	-	-	-	-
Liver-specific A compartments	4	89820000	89840000	1.19044	-2.26424	3.45467	ENSSSCG00000006379	CD48	20.97	5.65	2.00093	1.99552e-05
Liver-specific A compartments	4	89840000	89860000	1.12373	-2.16801	3.29174	-	-	-	-	-	-
Liver-specific A compartments	4	89860000	89880000	1.20287	-2.1456	3.34848	ENSSSCG00000006380	SLAMF1	0.7	1.25	-0.909711	0.00911553
Liver-specific A compartments	4	89880000	89900000	1.32391	-1.89027	3.21418	-	-	-	-	-	-
Liver-specific A compartments	4	89900000	89920000	1.10738	-1.42529	2.53267	-	-	-	-	-	-
Liver-specific A compartments	4	89920000	89940000	1.06469	-1.46257	2.52726	ENSSSCG00000006381	CD84	7.33	4.21	0.951844	0.0118976
Liver-specific A compartments	4	89940000	89960000	1.3252	-1.57006	2.89526	-	-	-	-	-	-
Liver-specific A compartments	4	89960000	89980000	1.34765	-1.88705	3.2347	-	-	-	-	-	-
Liver-specific A compartments	4	89980000	90000000	1.42827	-1.76306	3.19133	ENSSSCG00000006382	SLAMF6	3.42	1.33	1.34727	4.13032e-06
Liver-specific A compartments	4	90000000	90020000	1.52305	-1.64194	3.165	-	-	-	-	-	-
Liver-specific A compartments	4	90020000	90040000	1.64074	-1.1996	2.84034	-	-	-	-	-	-
Liver-specific A compartments	4	90040000	90060000	1.85609	-0.624448	2.48054	-	-	-	-	-	-
Liver-specific A compartments	4	90640000	90660000	1.87174	-0.321723	2.19346	-	-	-	-	-	-
Liver-specific A compartments	4	90720000	90740000	1.93501	-0.549331	2.48435	ENSSSCG00000006403;ENSSSCG00000033585	CRP;DUSP23	1330.83;86.67	5.76;19.96	8.05881100566589;1.8057892506327	1.67642392515483e-113;4.63394769564852e-07
Liver-specific A compartments	4	90740000	90760000	1.7595	-1.71501	3.47452	-	-	-	-	-	-
Liver-specific A compartments	4	90760000	90780000	1.56627	-2.20853	3.7748	-	-	-	-	-	-
Liver-specific A compartments	4	90780000	90800000	1.33927	-2.89508	4.23435	-	-	-	-	-	-
Liver-specific A compartments	4	90800000	90820000	1.07011	-3.17485	4.24495	-	-	-	-	-	-
Liver-specific A compartments	4	90820000	90840000	0.857683	-3.35634	4.21403	-	-	-	-	-	-
Liver-specific A compartments	4	90840000	90860000	0.727496	-3.47589	4.20339	-	-	-	-	-	-
Liver-specific A compartments	4	90860000	90880000	0.573474	-3.69611	4.26958	-	-	-	-	-	-
Liver-specific A compartments	4	90880000	90900000	0.59319	-3.41894	4.01213	ENSSSCG00000041117	Unknown	0.01	0	-	-
Liver-specific A compartments	4	90900000	90920000	0.712062	-3.46118	4.17324	ENSSSCG00000037268	APCS	440.93	1	9.00402	6.19166e-29
Liver-specific A compartments	4	90920000	90940000	0.66958	-3.72861	4.39819	-	-	-	-	-	-
Liver-specific A compartments	4	90940000	90960000	0.641628	-3.81373	4.45536	ENSSSCG00000050088	OR10J5	0.14	0.03	-	-
Liver-specific A compartments	4	90960000	90980000	0.626539	-3.75063	4.37717	-	-	-	-	-	-
Liver-specific A compartments	4	90980000	91000000	0.472465	-3.79584	4.2683	-	-	-	-	-	-
Liver-specific A compartments	4	91000000	91020000	0.376834	-3.9688	4.34563	ENSSSCG00000024008	OR10J1	0.06	0	-	-
Liver-specific A compartments	4	91200000	91220000	0.496983	-2.36022	2.8572	-	-	-	-	-	-
Liver-specific A compartments	4	91220000	91240000	0.484185	-1.31073	1.79491	ENSSSCG00000036223	ACKR1	1.61	30.29	-4.38769	1.81913e-39
Liver-specific A compartments	4	91240000	91260000	0.509407	-0.835986	1.34539	-	-	-	-	-	-
Liver-specific A compartments	4	91260000	91280000	0.302705	-1.40547	1.70817	ENSSSCG00000006415	CADM3	0.9	288.15	-9.36825	0
Liver-specific A compartments	4	92120000	92140000	0.691568	-0.584034	1.2756	-	-	-	-	-	-
Liver-specific A compartments	4	92140000	92160000	0.846516	-0.6266	1.47312	-	-	-	-	-	-
Liver-specific A compartments	4	92160000	92180000	0.787551	-0.762226	1.54978	-	-	-	-	-	-
Liver-specific A compartments	4	92180000	92200000	0.946179	-0.60196	1.54814	-	-	-	-	-	-
Liver-specific A compartments	4	92200000	92220000	1.08182	-0.664352	1.74617	-	-	-	-	-	-
Liver-specific A compartments	4	92220000	92240000	1.04514	-0.714847	1.75999	-	-	-	-	-	-
Liver-specific A compartments	4	92240000	92260000	1.10608	-0.447146	1.55323	-	-	-	-	-	-
Liver-specific A compartments	4	92300000	92320000	1.12995	-0.412914	1.54287	ENSSSCG00000039068	UBE2E3	0	0.08	-	-
Liver-specific A compartments	4	92320000	92340000	0.969144	-0.94554	1.91468	-	-	-	-	-	-
Liver-specific A compartments	4	92340000	92360000	0.967048	-1.31092	2.27796	-	-	-	-	-	-
Liver-specific A compartments	4	92360000	92380000	1.11991	-1.42479	2.5447	-	-	-	-	-	-
Liver-specific A compartments	4	92380000	92400000	1.5873	-1.77753	3.36483	ENSSSCG00000006455	CD5L	800.17	1.89	8.71186	7.15932e-123
Liver-specific A compartments	4	92400000	92420000	1.21794	-1.97066	3.1886	ENSSSCG00000006456	FCRL1	1.61	1.92	-0.125278	0.74501
Liver-specific A compartments	4	92420000	92440000	0.969768	-2.35419	3.32396	-	-	-	-	-	-
Liver-specific A compartments	4	92440000	92460000	0.917503	-2.51483	3.43233	-	-	-	-	-	-
Liver-specific A compartments	4	92460000	92480000	0.846369	-2.53674	3.38311	ENSSSCG00000006457	FCRL3	4.32	0.24	4.58246	1.46956e-18
Liver-specific A compartments	4	92480000	92500000	0.968681	-2.28792	3.2566	-	-	-	-	-	-
Liver-specific A compartments	4	92500000	92520000	1.02047	-2.04706	3.06753	-	-	-	-	-	-
Liver-specific A compartments	4	92520000	92540000	1.15813	-2.09448	3.25261	-	-	-	-	-	-
Liver-specific A compartments	4	92540000	92560000	1.18735	-2.03102	3.21837	ENSSSCG00000006458	FCRL4	0.21	0.02	-	-
Liver-specific A compartments	4	92560000	92580000	1.23565	-2.08337	3.31902	-	-	-	-	-	-
Liver-specific A compartments	4	92580000	92600000	1.45183	-1.89403	3.34587	ENSSSCG00000026210	FCRL5	0.53	0.08	3.04922	0.000549175
Liver-specific A compartments	4	92600000	92620000	1.70086	-1.89447	3.59533	-	-	-	-	-	-
Liver-specific A compartments	4	92620000	92640000	1.95617	-1.49519	3.45135	-	-	-	-	-	-
Liver-specific A compartments	4	92640000	92660000	2.1886	-0.872079	3.06068	-	-	-	-	-	-
Liver-specific A compartments	4	92660000	92680000	2.21034	-0.857447	3.06778	-	-	-	-	-	-
Liver-specific A compartments	4	92680000	92700000	2.35067	-0.81515	3.16582	-	-	-	-	-	-
Liver-specific A compartments	4	92700000	92720000	2.621	-0.779184	3.40018	-	-	-	-	-	-
Liver-specific A compartments	4	92720000	92740000	2.82221	-0.881559	3.70377	-	-	-	-	-	-
Liver-specific A compartments	4	92740000	92760000	3.05303	-0.629361	3.68239	ENSSSCG00000036622	Unknown	15.63	2.04	3.08129	3.78914e-23
Liver-specific A compartments	4	92760000	92780000	3.00892	-0.373625	3.38254	-	-	-	-	-	-
Liver-specific A compartments	4	92780000	92800000	2.7658	-0.354409	3.1202	ENSSSCG00000049524	Unknown	35.77	22.75	0.733079	0.000276671
Liver-specific A compartments	4	92800000	92820000	2.43963	-0.913595	3.35323	-	-	-	-	-	-
Liver-specific A compartments	4	92820000	92840000	2.61219	-1.52351	4.1357	ENSSSCG00000043115	Unknown	29.89	0.96	4.96055	1.77721e-20
Liver-specific A compartments	4	92840000	92860000	2.51411	-1.65578	4.16989	-	-	-	-	-	-
Liver-specific A compartments	4	92860000	92880000	2.5333	-1.76256	4.29586	-	-	-	-	-	-
Liver-specific A compartments	4	92880000	92900000	2.42425	-1.50477	3.92902	-	-	-	-	-	-
Liver-specific A compartments	4	92900000	92920000	2.52964	-0.898118	3.42775	-	-	-	-	-	-
Liver-specific A compartments	4	96260000	96280000	1.5702	-0.63938	2.20958	-	-	-	-	-	-
Liver-specific A compartments	4	96280000	96300000	1.23925	-0.822692	2.06194	-	-	-	-	-	-
Liver-specific A compartments	4	96300000	96320000	0.969382	-0.943497	1.91288	-	-	-	-	-	-
Liver-specific A compartments	4	96320000	96340000	0.831372	-1.10838	1.93975	-	-	-	-	-	-
Liver-specific A compartments	4	96640000	96660000	0.555188	-1.56934	2.12452	ENSSSCG00000006595	IVL	0.11	0.01	-	-
Liver-specific A compartments	4	96660000	96680000	0.628195	-1.57363	2.20182	ENSSSCG00000006594	SMCP	0.01	0	-	-
Liver-specific A compartments	4	96680000	96700000	0.468859	-1.97088	2.43973	-	-	-	-	-	-
Liver-specific A compartments	4	96720000	96740000	0.572831	-2.2035	2.77633	-	-	-	-	-	-
Liver-specific A compartments	4	96740000	96760000	0.808855	-2.16163	2.97048	-	-	-	-	-	-
Liver-specific A compartments	4	96760000	96780000	1.02211	-2.35979	3.3819	-	-	-	-	-	-
Liver-specific A compartments	4	96780000	96800000	1.0624	-2.23637	3.29877	ENSSSCG00000040878	LCE5A	0	0	-	-
Liver-specific A compartments	4	96800000	96820000	1.23499	-2.00383	3.23882	-	-	-	-	-	-
Liver-specific A compartments	4	96820000	96840000	1.11554	-2.02655	3.14209	-	-	-	-	-	-
Liver-specific A compartments	4	96840000	96860000	1.03974	-1.95185	2.99159	-	-	-	-	-	-
Liver-specific A compartments	4	96860000	96880000	1.18737	-1.73811	2.92548	-	-	-	-	-	-
Liver-specific A compartments	4	96880000	96900000	1.40908	-1.24431	2.65339	-	-	-	-	-	-
Liver-specific A compartments	4	96900000	96920000	1.3799	-0.64247	2.02237	ENSSSCG00000042968	Unknown	0.24	0.7	-1.48	0.000208529
Liver-specific A compartments	4	96920000	96940000	1.29088	-0.694383	1.98527	ENSSSCG00000006604	CRNN	0.83	0.84	0.115068	0.729123
Liver-specific A compartments	4	96940000	96960000	1.07796	-1.05244	2.13041	-	-	-	-	-	-
Liver-specific A compartments	4	96960000	96980000	0.713717	-1.80018	2.5139	-	-	-	-	-	-
Liver-specific A compartments	4	96980000	97000000	0.654362	-2.13651	2.79087	ENSSSCG00000030031;ENSSSCG00000042564	Unknown;FLG2	0.03;0	0;0	-;-	-;-
Liver-specific A compartments	4	97000000	97020000	0.799602	-2.41011	3.20971	-	-	-	-	-	-
Liver-specific A compartments	4	97020000	97040000	0.713705	-2.37369	3.08739	ENSSSCG00000044041	Unknown	0.12	0.01	-	-
Liver-specific A compartments	4	97040000	97060000	0.856544	-2.03358	2.89012	-	-	-	-	-	-
Liver-specific A compartments	4	97060000	97080000	0.936021	-1.58628	2.52231	-	-	-	-	-	-
Liver-specific A compartments	4	97080000	97100000	0.922309	-1.50087	2.42318	-	-	-	-	-	-
Liver-specific A compartments	4	97100000	97120000	1.22885	-1.48172	2.71057	-	-	-	-	-	-
Liver-specific A compartments	4	97120000	97140000	1.26744	-1.7993	3.06673	ENSSSCG00000006605	RPTN	0.02	0	-	-
Liver-specific A compartments	4	97140000	97160000	1.26973	-1.77473	3.04446	-	-	-	-	-	-
Liver-specific A compartments	4	97160000	97180000	1.32965	-1.53461	2.86425	ENSSSCG00000006609;ENSSSCG00000038121	TCHHL1;Unknown	0.03;0.3	0;0.62	-;-1.4885288510399	-;0.290260911399427
Liver-specific A compartments	4	97180000	97200000	1.66399	-1.11914	2.78313	-	-	-	-	-	-
Liver-specific A compartments	4	97200000	97220000	2.1088	-0.646794	2.7556	-	-	-	-	-	-
Liver-specific A compartments	4	99620000	99640000	2.90369	-0.289367	3.19306	-	-	-	-	-	-
Liver-specific A compartments	4	99660000	99680000	2.75081	-0.454168	3.20498	-	-	-	-	-	-
Liver-specific A compartments	4	99740000	99760000	1.88	-0.970402	2.8504	-	-	-	-	-	-
Liver-specific A compartments	4	99760000	99780000	1.87928	-1.73632	3.6156	-	-	-	-	-	-
Liver-specific A compartments	4	99780000	99800000	1.81411	-1.9223	3.73641	-	-	-	-	-	-
Liver-specific A compartments	4	99800000	99820000	1.87361	-1.91681	3.79041	-	-	-	-	-	-
Liver-specific A compartments	4	99820000	99840000	1.72877	-1.80725	3.53603	-	-	-	-	-	-
Liver-specific A compartments	4	99840000	99860000	1.89344	-1.65435	3.54779	ENSSSCG00000006696	GJA5	13.81	4.56	1.60794	1.47557e-09
Liver-specific A compartments	4	99860000	99880000	1.86885	-1.2974	3.16625	-	-	-	-	-	-
Liver-specific A compartments	4	99880000	99900000	1.94208	-0.809054	2.75114	-	-	-	-	-	-
Liver-specific A compartments	4	100020000	100040000	2.26103	-0.410045	2.67107	-	-	-	-	-	-
Liver-specific A compartments	4	100060000	100080000	1.98811	-0.54518	2.53329	-	-	-	-	-	-
Liver-specific A compartments	4	100080000	100100000	1.76887	-0.77335	2.54222	-	-	-	-	-	-
Liver-specific A compartments	4	100100000	100120000	1.45214	-1.06488	2.51702	-	-	-	-	-	-
Liver-specific A compartments	4	100120000	100140000	1.1515	-2.21949	3.37098	-	-	-	-	-	-
Liver-specific A compartments	4	100140000	100160000	0.962881	-2.89124	3.85412	-	-	-	-	-	-
Liver-specific A compartments	4	100160000	100180000	0.852015	-3.30678	4.1588	ENSSSCG00000033862	Unknown	0.01	0.05	-	-
Liver-specific A compartments	4	100180000	100200000	0.748769	-3.40355	4.15232	-	-	-	-	-	-
Liver-specific A compartments	4	100200000	100220000	0.773879	-3.27142	4.0453	-	-	-	-	-	-
Liver-specific A compartments	4	100220000	100240000	0.981894	-2.6722	3.65409	-	-	-	-	-	-
Liver-specific A compartments	4	100240000	100260000	1.2125	-2.3921	3.6046	-	-	-	-	-	-
Liver-specific A compartments	4	100260000	100280000	1.61656	-1.33875	2.95531	-	-	-	-	-	-
Liver-specific A compartments	4	100280000	100300000	1.95804	-0.644171	2.60221	-	-	-	-	-	-
Liver-specific A compartments	4	100320000	100340000	2.62282	-0.449475	3.07229	ENSSSCG00000006702	FMO5	235.21	12.36	3.59479	4.04022e-33
Liver-specific A compartments	4	100340000	100360000	2.46565	-0.595451	3.0611	-	-	-	-	-	-
Liver-specific A compartments	4	100380000	100400000	2.61278	-0.888953	3.50174	-	-	-	-	-	-
Liver-specific A compartments	4	100400000	100420000	2.26141	-2.34301	4.60442	-	-	-	-	-	-
Liver-specific A compartments	4	100420000	100440000	2.56721	-2.08337	4.65058	ENSSSCG00000006701	CHD1L	19.59	12.99	0.582645	0.00025416
Liver-specific A compartments	4	100440000	100460000	2.77023	-1.69954	4.46977	-	-	-	-	-	-
Liver-specific A compartments	4	100460000	100480000	2.61926	-1.36533	3.9846	ENSSSCG00000006704	NBPF19	4.5	1.31	1.83133	2.16171e-09
Liver-specific A compartments	4	100480000	100500000	2.37342	-1.18873	3.56215	-	-	-	-	-	-
Liver-specific A compartments	4	100500000	100520000	1.46449	-2.45527	3.91976	-	-	-	-	-	-
Liver-specific A compartments	4	100620000	100640000	1.4901	-2.37135	3.86144	-	-	-	-	-	-
Liver-specific A compartments	4	100640000	100660000	1.41373	-2.36265	3.77638	-	-	-	-	-	-
Liver-specific A compartments	4	100660000	100680000	1.55951	-1.65709	3.2166	-	-	-	-	-	-
Liver-specific A compartments	4	100680000	100700000	1.50279	-1.08582	2.58861	-	-	-	-	-	-
Liver-specific A compartments	4	100700000	100720000	1.81937	-0.493517	2.31289	-	-	-	-	-	-
Liver-specific A compartments	4	100740000	100760000	1.66228	-0.971548	2.63383	-	-	-	-	-	-
Liver-specific A compartments	4	100760000	100780000	1.51751	-1.31227	2.82978	ENSSSCG00000049559	Unknown	0.38	9.36	-4.83638	1.13841e-36
Liver-specific A compartments	4	100780000	100800000	1.39419	-1.51824	2.91243	-	-	-	-	-	-
Liver-specific A compartments	4	100800000	100820000	1.36606	-1.26418	2.63024	-	-	-	-	-	-
Liver-specific A compartments	4	100820000	100840000	1.60789	-0.610879	2.21877	-	-	-	-	-	-
Liver-specific A compartments	4	100840000	100860000	1.57762	-0.775755	2.35337	-	-	-	-	-	-
Liver-specific A compartments	4	100900000	100920000	1.92436	-0.33125	2.25561	-	-	-	-	-	-
Liver-specific A compartments	4	100920000	100940000	2.02431	-0.730426	2.75474	-	-	-	-	-	-
Liver-specific A compartments	4	100940000	100960000	1.97905	-0.832147	2.8112	ENSSSCG00000006709	NOTCH2	65.34	27.2	1.19884	8.12713e-12
Liver-specific A compartments	4	100960000	100980000	1.94307	-0.597971	2.54104	-	-	-	-	-	-
Liver-specific A compartments	4	100980000	101000000	2.09571	-0.405775	2.50148	-	-	-	-	-	-
Liver-specific A compartments	4	101000000	101020000	2.08799	-0.404746	2.49274	-	-	-	-	-	-
Liver-specific A compartments	4	101060000	101080000	1.77388	-0.423013	2.19689	-	-	-	-	-	-
Liver-specific A compartments	4	101120000	101140000	1.2948	-1.02004	2.31483	-	-	-	-	-	-
Liver-specific A compartments	4	101140000	101160000	1.15479	-1.32735	2.48214	-	-	-	-	-	-
Liver-specific A compartments	4	101480000	101500000	0.514609	-1.16765	1.68226	-	-	-	-	-	-
Liver-specific A compartments	4	101500000	101520000	0.74295	-0.613227	1.35618	-	-	-	-	-	-
Liver-specific A compartments	4	101540000	101560000	0.561431	-0.799643	1.36107	-	-	-	-	-	-
Liver-specific A compartments	4	101560000	101580000	0.383804	-1.37079	1.75459	ENSSSCG00000006719	Unknown	9.25	2.24	1.69526	3.28114e-08
Liver-specific A compartments	4	102880000	102900000	0.700941	-0.727747	1.42869	-	-	-	-	-	-
Liver-specific A compartments	4	102900000	102920000	0.707606	-0.975434	1.68304	-	-	-	-	-	-
Liver-specific A compartments	4	102920000	102940000	0.665821	-1.33705	2.00287	-	-	-	-	-	-
Liver-specific A compartments	4	102940000	102960000	0.650738	-1.84116	2.49189	-	-	-	-	-	-
Liver-specific A compartments	4	102960000	102980000	0.513435	-2.10213	2.61557	-	-	-	-	-	-
Liver-specific A compartments	4	103040000	103060000	0.488852	-1.72309	2.21194	-	-	-	-	-	-
Liver-specific A compartments	4	103060000	103080000	0.611562	-1.54034	2.1519	-	-	-	-	-	-
Liver-specific A compartments	4	103080000	103100000	0.895831	-1.12875	2.02458	-	-	-	-	-	-
Liver-specific A compartments	4	103100000	103120000	1.08372	-0.940099	2.02382	ENSSSCG00000040549	Unknown	4.86	10.92	-1.31677	0.0107542
Liver-specific A compartments	4	103120000	103140000	1.40603	-0.568559	1.97459	-	-	-	-	-	-
Liver-specific A compartments	4	103140000	103160000	1.52584	-0.333121	1.85897	-	-	-	-	-	-
Liver-specific A compartments	4	103160000	103180000	1.30688	-0.701006	2.00789	ENSSSCG00000006729	TENT5C	34.23	4.54	2.97729	1.24769e-31
Liver-specific A compartments	4	103180000	103200000	1.42423	-0.794927	2.21916	-	-	-	-	-	-
Liver-specific A compartments	4	103200000	103220000	1.17527	-0.904397	2.07967	-	-	-	-	-	-
Liver-specific A compartments	4	103220000	103240000	0.888163	-1.11256	2.00073	-	-	-	-	-	-
Liver-specific A compartments	4	103240000	103260000	0.828078	-1.4168	2.24488	-	-	-	-	-	-
Liver-specific A compartments	4	103260000	103280000	0.811035	-1.45199	2.26302	-	-	-	-	-	-
Liver-specific A compartments	4	103280000	103300000	0.83653	-1.76133	2.59786	-	-	-	-	-	-
Liver-specific A compartments	4	103300000	103320000	0.803803	-1.66553	2.46933	-	-	-	-	-	-
Liver-specific A compartments	4	103320000	103340000	0.91523	-1.45523	2.37046	-	-	-	-	-	-
Liver-specific A compartments	4	103340000	103360000	0.997723	-1.16462	2.16234	-	-	-	-	-	-
Liver-specific A compartments	4	103360000	103380000	1.39175	-0.46913	1.86088	ENSSSCG00000006730	MAN1A2	40.9	60.93	-0.479695	0.0124833
Liver-specific A compartments	4	103380000	103400000	1.06107	-0.815971	1.87704	-	-	-	-	-	-
Liver-specific A compartments	4	103400000	103420000	0.724146	-1.71306	2.43721	ENSSSCG00000006731	VTCN1	1.53	3.65	-0.96567	0.020258
Liver-specific A compartments	4	103540000	103560000	0.517794	-1.99657	2.51437	-	-	-	-	-	-
Liver-specific A compartments	4	103560000	103580000	0.727124	-1.82273	2.54986	-	-	-	-	-	-
Liver-specific A compartments	4	103580000	103600000	1.05829	-1.32838	2.38668	-	-	-	-	-	-
Liver-specific A compartments	4	103620000	103640000	1.65966	-0.426477	2.08614	-	-	-	-	-	-
Liver-specific A compartments	4	103640000	103660000	1.88921	-0.384942	2.27415	-	-	-	-	-	-
Liver-specific A compartments	4	103680000	103700000	1.90016	-0.352752	2.25291	-	-	-	-	-	-
Liver-specific A compartments	4	103700000	103720000	1.60658	-0.702046	2.30862	-	-	-	-	-	-
Liver-specific A compartments	4	103720000	103740000	1.60715	-0.849681	2.45683	ENSSSCG00000006734	CD101	0.55	0.85	-0.37258	0.168485
Liver-specific A compartments	4	103740000	103760000	1.62583	-0.642891	2.26872	-	-	-	-	-	-
Liver-specific A compartments	4	103760000	103780000	1.48365	-0.661705	2.14535	-	-	-	-	-	-
Liver-specific A compartments	4	103780000	103800000	1.519	-0.726463	2.24546	ENSSSCG00000006735	PTGFRN	20.59	18.63	0.258452	0.335687
Liver-specific A compartments	4	103800000	103820000	1.60703	-0.8675	2.47453	-	-	-	-	-	-
Liver-specific A compartments	4	103820000	103840000	1.61682	-0.600932	2.21775	-	-	-	-	-	-
Liver-specific A compartments	4	103840000	103860000	1.59908	-0.787492	2.38657	-	-	-	-	-	-
Liver-specific A compartments	4	103860000	103880000	1.66878	-0.454874	2.12365	-	-	-	-	-	-
Liver-specific A compartments	4	103880000	103900000	1.60525	-0.774598	2.37985	-	-	-	-	-	-
Liver-specific A compartments	4	103900000	103920000	1.66228	-0.855435	2.51771	-	-	-	-	-	-
Liver-specific A compartments	4	103920000	103940000	1.75348	-0.521903	2.27538	-	-	-	-	-	-
Liver-specific A compartments	4	103940000	103960000	2.00124	-0.576635	2.57788	-	-	-	-	-	-
Liver-specific A compartments	4	103960000	103980000	2.04936	-0.517974	2.56734	ENSSSCG00000006736	CD2	5.42	1.44	2.12532	6.87493e-06
Liver-specific A compartments	4	103980000	104000000	1.93812	-0.341869	2.27999	ENSSSCG00000006737	IGSF3	6.07	18.82	-1.54857	4.89362e-09
Liver-specific A compartments	4	104000000	104020000	1.9238	-0.680407	2.60421	-	-	-	-	-	-
Liver-specific A compartments	4	104020000	104040000	2.09478	-0.684317	2.7791	-	-	-	-	-	-
Liver-specific A compartments	4	104060000	104080000	2.31021	-0.317523	2.62773	-	-	-	-	-	-
Liver-specific A compartments	4	104080000	104100000	2.34363	-0.34264	2.68627	-	-	-	-	-	-
Liver-specific A compartments	4	104100000	104120000	2.40718	-0.476975	2.88416	-	-	-	-	-	-
[truncated: 9,191 more rows]

## Sheet: Sheet 4
A/B switches between muscle and brain	Chromosome	Start	End	Mean A-B index in the muscle	Mean A-B index in the brain	ΔA-B index (muscle – brain)	GeneID	Symbol	Mean TPM in muscle	Mean TPM in brain	log2FC of expression (muscle / brain)	P-value of expression
Muscle-specific A compartments	1	10440000	10460000	0.812003	-0.248112	1.06012	-	-	-	-	-	-
Muscle-specific A compartments	1	10460000	10480000	0.420629	-0.705274	1.1259	-	-	-	-	-	-
Muscle-specific A compartments	1	12220000	12240000	1.63847	-0.368831	2.00731	-	-	-	-	-	-
Muscle-specific A compartments	1	12240000	12260000	1.50235	-0.350796	1.85314	-	-	-	-	-	-
Muscle-specific A compartments	1	12260000	12280000	1.43701	-0.257262	1.69427	-	-	-	-	-	-
Muscle-specific A compartments	1	13860000	13880000	0.584821	-0.564276	1.1491	-	-	-	-	-	-
Muscle-specific A compartments	1	14220000	14240000	2.13519	-0.397394	2.53259	-	-	-	-	-	-
Muscle-specific A compartments	1	14240000	14260000	2.08375	-1.00599	3.08974	-	-	-	-	-	-
Muscle-specific A compartments	1	14260000	14280000	1.34217	-1.7041	3.04627	-	-	-	-	-	-
Muscle-specific A compartments	1	14280000	14300000	1.15075	-1.87515	3.0259	-	-	-	-	-	-
Muscle-specific A compartments	1	14300000	14320000	1.16451	-2.07732	3.24184	-	-	-	-	-	-
Muscle-specific A compartments	1	14320000	14340000	0.998051	-2.11785	3.1159	-	-	-	-	-	-
Muscle-specific A compartments	1	14340000	14360000	0.817659	-1.99307	2.81073	-	-	-	-	-	-
Muscle-specific A compartments	1	14360000	14380000	0.917747	-2.37308	3.29083	-	-	-	-	-	-
Muscle-specific A compartments	1	14380000	14400000	1.23333	-2.05221	3.28554	-	-	-	-	-	-
Muscle-specific A compartments	1	14400000	14420000	0.971373	-1.91011	2.88149	-	-	-	-	-	-
Muscle-specific A compartments	1	14420000	14440000	0.768737	-1.86392	2.63266	-	-	-	-	-	-
Muscle-specific A compartments	1	14440000	14460000	1.01045	-1.50156	2.512	-	-	-	-	-	-
Muscle-specific A compartments	1	14460000	14480000	0.994666	-1.62526	2.61992	-	-	-	-	-	-
Muscle-specific A compartments	1	14480000	14500000	1.6519	-1.01291	2.66481	ENSSSCG00000025777	ESR1	8.67	1.49	2.41379	4.09044e-07
Muscle-specific A compartments	1	14500000	14520000	0.761837	-1.2073	1.96914	-	-	-	-	-	-
Muscle-specific A compartments	1	14520000	14540000	0.716292	-0.993795	1.71009	-	-	-	-	-	-
Muscle-specific A compartments	1	14540000	14560000	0.532888	-1.12668	1.65957	-	-	-	-	-	-
Muscle-specific A compartments	1	14680000	14700000	0.243541	-0.200445	0.443987	-	-	-	-	-	-
Muscle-specific A compartments	1	17700000	17720000	0.42951	-0.368806	0.798316	-	-	-	-	-	-
Muscle-specific A compartments	1	18460000	18480000	0.461812	-0.571588	1.0334	-	-	-	-	-	-
Muscle-specific A compartments	1	19680000	19700000	2.1234	-0.26799	2.39138	-	-	-	-	-	-
Muscle-specific A compartments	1	19700000	19720000	2.32858	-0.839518	3.1681	-	-	-	-	-	-
Muscle-specific A compartments	1	19720000	19740000	2.45254	-0.627064	3.0796	-	-	-	-	-	-
Muscle-specific A compartments	1	19820000	19840000	1.86416	-0.364191	2.22835	-	-	-	-	-	-
Muscle-specific A compartments	1	19840000	19860000	1.56583	-0.943099	2.50893	-	-	-	-	-	-
Muscle-specific A compartments	1	19860000	19880000	1.23782	-1.18589	2.42371	-	-	-	-	-	-
Muscle-specific A compartments	1	19880000	19900000	1.13649	-1.15748	2.29398	-	-	-	-	-	-
Muscle-specific A compartments	1	19900000	19920000	0.877375	-1.67689	2.55427	-	-	-	-	-	-
Muscle-specific A compartments	1	19920000	19940000	0.526513	-2.01794	2.54445	-	-	-	-	-	-
Muscle-specific A compartments	1	20240000	20260000	0.777181	-1.84609	2.62328	-	-	-	-	-	-
Muscle-specific A compartments	1	20260000	20280000	1.10264	-2.22931	3.33195	-	-	-	-	-	-
Muscle-specific A compartments	1	20280000	20300000	0.847356	-2.17025	3.01761	-	-	-	-	-	-
Muscle-specific A compartments	1	20300000	20320000	0.697065	-1.8378	2.53486	-	-	-	-	-	-
Muscle-specific A compartments	1	20320000	20340000	0.656759	-1.714	2.37076	-	-	-	-	-	-
Muscle-specific A compartments	1	20340000	20360000	0.561429	-1.31131	1.87273	-	-	-	-	-	-
Muscle-specific A compartments	1	20360000	20380000	0.822149	-0.769264	1.59141	-	-	-	-	-	-
Muscle-specific A compartments	1	20380000	20400000	0.99654	-1.01302	2.00956	-	-	-	-	-	-
Muscle-specific A compartments	1	20400000	20420000	0.952841	-1.5427	2.49554	-	-	-	-	-	-
Muscle-specific A compartments	1	20420000	20440000	1.22128	-1.71711	2.93838	-	-	-	-	-	-
Muscle-specific A compartments	1	20440000	20460000	1.28428	-1.73478	3.01907	-	-	-	-	-	-
Muscle-specific A compartments	1	20460000	20480000	1.57996	-1.78125	3.36121	-	-	-	-	-	-
Muscle-specific A compartments	1	20480000	20500000	1.75066	-1.50772	3.25838	-	-	-	-	-	-
Muscle-specific A compartments	1	20500000	20520000	2.04728	-1.02072	3.068	-	-	-	-	-	-
Muscle-specific A compartments	1	20520000	20540000	2.37729	-0.752883	3.13017	-	-	-	-	-	-
Muscle-specific A compartments	1	20540000	20560000	2.4636	-0.901729	3.36533	-	-	-	-	-	-
Muscle-specific A compartments	1	20560000	20580000	2.31348	-0.643659	2.95714	-	-	-	-	-	-
Muscle-specific A compartments	1	20580000	20600000	2.54093	-0.540767	3.0817	-	-	-	-	-	-
Muscle-specific A compartments	1	20600000	20620000	2.336	-0.5518	2.8878	-	-	-	-	-	-
Muscle-specific A compartments	1	20620000	20640000	2.55584	-0.529307	3.08514	-	-	-	-	-	-
Muscle-specific A compartments	1	20640000	20660000	2.08896	-0.59875	2.68771	-	-	-	-	-	-
Muscle-specific A compartments	1	20660000	20680000	2.20707	-0.526771	2.73384	-	-	-	-	-	-
Muscle-specific A compartments	1	20680000	20700000	2.0945	-0.317008	2.41151	-	-	-	-	-	-
Muscle-specific A compartments	1	20700000	20720000	1.93593	-0.43361	2.36954	-	-	-	-	-	-
Muscle-specific A compartments	1	20720000	20740000	1.85573	-0.355546	2.21127	-	-	-	-	-	-
Muscle-specific A compartments	1	20740000	20760000	1.51254	-0.291614	1.80415	-	-	-	-	-	-
Muscle-specific A compartments	1	20800000	20820000	1.77338	-0.290564	2.06395	-	-	-	-	-	-
Muscle-specific A compartments	1	21140000	21160000	2.1133	-0.272695	2.386	ENSSSCG00000004125	STX11	3.44	0.41	3.06712	2.01982e-10
Muscle-specific A compartments	1	21180000	21200000	1.60611	-0.414632	2.02074	-	-	-	-	-	-
Muscle-specific A compartments	1	21580000	21600000	2.1614	-0.414195	2.5756	-	-	-	-	-	-
Muscle-specific A compartments	1	21600000	21620000	1.85221	-0.563243	2.41545	-	-	-	-	-	-
Muscle-specific A compartments	1	21620000	21640000	1.85815	-0.726368	2.58452	-	-	-	-	-	-
Muscle-specific A compartments	1	21640000	21660000	1.76774	-0.514748	2.28248	-	-	-	-	-	-
Muscle-specific A compartments	1	21840000	21860000	2.16685	-0.39393	2.56078	-	-	-	-	-	-
Muscle-specific A compartments	1	21860000	21880000	2.08444	-0.800157	2.8846	-	-	-	-	-	-
Muscle-specific A compartments	1	21880000	21900000	2.06832	-0.948357	3.01668	-	-	-	-	-	-
Muscle-specific A compartments	1	21900000	21920000	2.2434	-0.759276	3.00268	-	-	-	-	-	-
Muscle-specific A compartments	1	21920000	21940000	2.13727	-0.594897	2.73216	-	-	-	-	-	-
Muscle-specific A compartments	1	21940000	21960000	2.52439	-0.431879	2.95627	-	-	-	-	-	-
Muscle-specific A compartments	1	21980000	22000000	2.45057	-0.246254	2.69682	-	-	-	-	-	-
Muscle-specific A compartments	1	22000000	22020000	2.73836	-0.408698	3.14706	-	-	-	-	-	-
Muscle-specific A compartments	1	22020000	22040000	2.73459	-0.513902	3.24849	-	-	-	-	-	-
Muscle-specific A compartments	1	22040000	22060000	2.69042	-0.510652	3.20107	-	-	-	-	-	-
Muscle-specific A compartments	1	22060000	22080000	2.60484	-0.633047	3.23788	-	-	-	-	-	-
Muscle-specific A compartments	1	22080000	22100000	2.42679	-0.658392	3.08518	-	-	-	-	-	-
Muscle-specific A compartments	1	22100000	22120000	2.93824	-0.731416	3.66965	-	-	-	-	-	-
Muscle-specific A compartments	1	22120000	22140000	2.41625	-0.540235	2.95648	-	-	-	-	-	-
Muscle-specific A compartments	1	22500000	22520000	1.77683	-0.748913	2.52574	-	-	-	-	-	-
Muscle-specific A compartments	1	22520000	22540000	1.44641	-0.76617	2.21258	-	-	-	-	-	-
Muscle-specific A compartments	1	22540000	22560000	1.25892	-0.852059	2.11098	-	-	-	-	-	-
Muscle-specific A compartments	1	22560000	22580000	1.13258	-0.804673	1.93726	-	-	-	-	-	-
Muscle-specific A compartments	1	22580000	22600000	0.89637	-0.623293	1.51966	-	-	-	-	-	-
Muscle-specific A compartments	1	22600000	22620000	0.847181	-0.629096	1.47628	-	-	-	-	-	-
Muscle-specific A compartments	1	22660000	22680000	0.666702	-0.531895	1.1986	-	-	-	-	-	-
Muscle-specific A compartments	1	22680000	22700000	0.457402	-0.66255	1.11995	-	-	-	-	-	-
Muscle-specific A compartments	1	22700000	22720000	0.381426	-0.447867	0.829293	-	-	-	-	-	-
Muscle-specific A compartments	1	22720000	22740000	0.648077	-0.590496	1.23857	-	-	-	-	-	-
Muscle-specific A compartments	1	22740000	22760000	0.699803	-0.684933	1.38474	-	-	-	-	-	-
Muscle-specific A compartments	1	22760000	22780000	0.78084	-0.675077	1.45592	-	-	-	-	-	-
Muscle-specific A compartments	1	22780000	22800000	0.645766	-0.523361	1.16913	-	-	-	-	-	-
Muscle-specific A compartments	1	22800000	22820000	0.62719	-0.57917	1.20636	ENSSSCG00000004139	ADGRG6	14.69	8.75	0.672644	0.09504
Muscle-specific A compartments	1	22820000	22840000	0.720801	-0.836048	1.55685	-	-	-	-	-	-
Muscle-specific A compartments	1	22840000	22860000	0.519299	-0.744028	1.26333	-	-	-	-	-	-
Muscle-specific A compartments	1	22860000	22880000	0.558006	-0.44471	1.00272	-	-	-	-	-	-
Muscle-specific A compartments	1	23980000	24000000	0.217689	-1.36135	1.57904	-	-	-	-	-	-
Muscle-specific A compartments	1	24000000	24020000	0.27016	-1.28657	1.55673	-	-	-	-	-	-
Muscle-specific A compartments	1	24100000	24120000	0.201071	-1.29255	1.49362	-	-	-	-	-	-
Muscle-specific A compartments	1	24140000	24160000	0.356643	-1.19507	1.55171	-	-	-	-	-	-
Muscle-specific A compartments	1	24160000	24180000	0.592273	-1.13267	1.72495	-	-	-	-	-	-
Muscle-specific A compartments	1	24180000	24200000	0.478372	-1.49276	1.97113	-	-	-	-	-	-
Muscle-specific A compartments	1	24200000	24220000	0.301353	-1.53542	1.83677	-	-	-	-	-	-
Muscle-specific A compartments	1	24220000	24240000	0.400953	-1.2957	1.69665	-	-	-	-	-	-
Muscle-specific A compartments	1	24240000	24260000	0.474762	-1.11416	1.58892	-	-	-	-	-	-
Muscle-specific A compartments	1	24260000	24280000	0.660203	-0.89486	1.55506	-	-	-	-	-	-
Muscle-specific A compartments	1	24280000	24300000	0.920937	-1.19871	2.11965	-	-	-	-	-	-
Muscle-specific A compartments	1	24300000	24320000	0.942395	-1.02749	1.96988	-	-	-	-	-	-
Muscle-specific A compartments	1	24320000	24340000	1.31606	-1.10298	2.41904	-	-	-	-	-	-
Muscle-specific A compartments	1	24340000	24360000	1.55681	-1.07164	2.62845	-	-	-	-	-	-
Muscle-specific A compartments	1	24360000	24380000	1.45134	-1.02928	2.48062	-	-	-	-	-	-
Muscle-specific A compartments	1	24380000	24400000	1.35822	-0.958821	2.31704	-	-	-	-	-	-
Muscle-specific A compartments	1	24400000	24420000	1.04157	-0.882054	1.92363	-	-	-	-	-	-
Muscle-specific A compartments	1	24420000	24440000	1.14796	-0.913813	2.06177	-	-	-	-	-	-
Muscle-specific A compartments	1	24440000	24460000	1.10976	-1.08912	2.19888	-	-	-	-	-	-
Muscle-specific A compartments	1	24460000	24480000	0.818907	-0.97254	1.79145	-	-	-	-	-	-
Muscle-specific A compartments	1	24480000	24500000	0.789827	-1.00806	1.79789	-	-	-	-	-	-
Muscle-specific A compartments	1	24500000	24520000	0.902933	-0.956788	1.85972	-	-	-	-	-	-
Muscle-specific A compartments	1	24520000	24540000	1.14989	-0.528714	1.6786	-	-	-	-	-	-
Muscle-specific A compartments	1	24540000	24560000	0.926847	-0.619157	1.546	-	-	-	-	-	-
Muscle-specific A compartments	1	24560000	24580000	1.02035	-0.649778	1.67012	-	-	-	-	-	-
Muscle-specific A compartments	1	24580000	24600000	0.86604	-0.55752	1.42356	-	-	-	-	-	-
Muscle-specific A compartments	1	24600000	24620000	0.937099	-0.46276	1.39986	-	-	-	-	-	-
Muscle-specific A compartments	1	24620000	24640000	0.994154	-0.422417	1.41657	-	-	-	-	-	-
Muscle-specific A compartments	1	24640000	24660000	1.02426	-0.436095	1.46035	-	-	-	-	-	-
Muscle-specific A compartments	1	24660000	24680000	1.09975	-0.294698	1.39445	-	-	-	-	-	-
Muscle-specific A compartments	1	24680000	24700000	1.16036	-0.335805	1.49616	-	-	-	-	-	-
Muscle-specific A compartments	1	24700000	24720000	1.32773	-0.273494	1.60122	-	-	-	-	-	-
Muscle-specific A compartments	1	24740000	24760000	1.24936	-0.469303	1.71867	-	-	-	-	-	-
Muscle-specific A compartments	1	24760000	24780000	1.39799	-0.516335	1.91433	-	-	-	-	-	-
Muscle-specific A compartments	1	24780000	24800000	1.4	-0.342525	1.74252	-	-	-	-	-	-
Muscle-specific A compartments	1	24800000	24820000	1.73149	-0.34897	2.08046	-	-	-	-	-	-
Muscle-specific A compartments	1	24820000	24840000	1.45741	-0.235968	1.69338	-	-	-	-	-	-
Muscle-specific A compartments	1	24840000	24860000	1.10062	-0.586246	1.68686	-	-	-	-	-	-
Muscle-specific A compartments	1	24860000	24880000	1.24235	-0.465457	1.70781	-	-	-	-	-	-
Muscle-specific A compartments	1	24880000	24900000	1.15385	-0.489094	1.64294	-	-	-	-	-	-
Muscle-specific A compartments	1	24900000	24920000	1.05151	-0.475009	1.52652	-	-	-	-	-	-
Muscle-specific A compartments	1	24920000	24940000	1.414	-0.37852	1.79252	-	-	-	-	-	-
Muscle-specific A compartments	1	24940000	24960000	1.28832	-0.330296	1.61861	-	-	-	-	-	-
Muscle-specific A compartments	1	24980000	25000000	1.43618	-0.382495	1.81867	-	-	-	-	-	-
[truncated: 12,412 more rows]

## Sheet: Readme
Supplementary Table 1. Characteristics of switched compartments between tissues.
[truncated: 4 more rows]
