# Supplementary material for: Haplotype-resolved 3D chromatin architecture of the hybrid pig
Source: HighWire-hosted journal article supplement (doi:10.1101/gr.278101.123), 2024-02-01
Supplement: Supplemental_Table_S2.xlsx [file Supplemental_Table_S2.xlsx]

## Sheet: Sheet 1
Tissue	Type of differential compartments between parent-of-origin	Subtype of differential compartments between parent-of-origin	Accumulative lengths (Mb)	% of the genome (autosomes only)	Mean A-B index in maternal allele	Mean A-B index in paternal allele	ΔA-B index (maternal vs. paternal allele)	Number of imprinted genes
Liver	A/B switches	Maternal-restricted A compartments	1.88	0.083	0.42	-0.41	0.83	0
		Paternal-restricted A compartments	2.64	0.12	-0.76	-1.36	0.6	0
	A/B variables	More active compartments in the maternal allele	2.04	0.09	-0.38	0.42	-0.8	0
		More active compartments in the paternal allele	2.5	0.11	-2.14	-1.18	-0.96	5
Muscle	A/B switches	Maternal-restricted A compartments	3.18	0.14	0.34	-0.34	0.68	0
		Paternal-restricted A compartments	3.72	0.16	0.51	-0.23	0.74	1
	A/B variables	More active compartments in the maternal allele	1.84	0.081	-0.33	0.36	-0.69	3
		More active compartments in the paternal allele	3.06	0.14	-1.78	-0.86	-0.92	7
Brain	A/B switches	Maternal-restricted A compartments	5.96	0.26	0.24	-0.24	0.48	0
		Paternal-restricted A compartments	6.54	0.29	-0.26	0.26	-0.52	1
	A/B variables	More active compartments in the maternal allele	1.12	0.049	0.95	0.33	0.62	0
		More active compartments in the paternal allele	3.12	0.14	-0.94	-0.12	-0.82	3

## Sheet: Sheet 2 (Liver)
Differential compartments between parent-of-origin	Chromosome	Start	End	Mean A-B index of maternal	Mean A-B index of paternal	ΔA-B index (maternal vs. paternal)	Ensembl ID of known imprinted gene	Symbol of known imprinted gene	Mean maternal TPM	Mean paternal TPM	Allelic expression ratio of maternal allele
Maternal-restricted A compartments	1	3900000	3920000	0.526847	-0.713524	1.24037	-	-	-	-	-
Maternal-restricted A compartments	1	5500000	5520000	0.407835	-0.471014	0.878848	-	-	-	-	-
Maternal-restricted A compartments	1	5520000	5540000	0.345194	-0.412482	0.757676	-	-	-	-	-
Maternal-restricted A compartments	1	5560000	5580000	0.678543	-0.54496	1.2235	-	-	-	-	-
Maternal-restricted A compartments	1	6540000	6560000	0.444879	-0.384135	0.829014	-	-	-	-	-
Maternal-restricted A compartments	1	22540000	22560000	0.451166	-0.245125	0.696292	-	-	-	-	-
Maternal-restricted A compartments	1	30040000	30060000	0.198116	-0.223282	0.421398	-	-	-	-	-
Maternal-restricted A compartments	1	32720000	32740000	0.334348	-0.211059	0.545407	-	-	-	-	-
Maternal-restricted A compartments	1	33120000	33140000	0.213483	-0.490405	0.703889	-	-	-	-	-
Maternal-restricted A compartments	1	56680000	56700000	0.102236	-0.321085	0.423321	-	-	-	-	-
Maternal-restricted A compartments	1	75980000	76000000	0.271034	-0.460518	0.731552	-	-	-	-	-
Maternal-restricted A compartments	1	97140000	97160000	0.29431	-0.189591	0.483902	-	-	-	-	-
Maternal-restricted A compartments	1	110500000	110520000	0.187027	-0.242559	0.429586	-	-	-	-	-
Maternal-restricted A compartments	1	134180000	134200000	0.291917	-0.196804	0.488721	-	-	-	-	-
Maternal-restricted A compartments	1	146500000	146520000	0.298557	-0.329896	0.628453	-	-	-	-	-
Maternal-restricted A compartments	2	119740000	119760000	0.382071	-0.169968	0.552039	-	-	-	-	-
Maternal-restricted A compartments	3	57060000	57080000	0.374	-0.510764	0.884764	-	-	-	-	-
Maternal-restricted A compartments	3	107980000	108000000	0.19713	-0.259898	0.457027	-	-	-	-	-
Maternal-restricted A compartments	4	105320000	105340000	0.126517	-0.392014	0.518531	-	-	-	-	-
Maternal-restricted A compartments	4	118500000	118520000	0.349001	-0.20247	0.551471	-	-	-	-	-
Maternal-restricted A compartments	5	11980000	12000000	0.818696	-0.565365	1.38406	-	-	-	-	-
Maternal-restricted A compartments	5	42520000	42540000	0.35923	-0.329624	0.688854	-	-	-	-	-
Maternal-restricted A compartments	6	15780000	15800000	0.253262	-0.364867	0.61813	-	-	-	-	-
Maternal-restricted A compartments	6	16040000	16060000	0.146449	-0.154829	0.301278	-	-	-	-	-
Maternal-restricted A compartments	6	31320000	31340000	0.0753473	-0.296792	0.372139	-	-	-	-	-
Maternal-restricted A compartments	7	61040000	61060000	0.298714	-0.233359	0.532073	-	-	-	-	-
Maternal-restricted A compartments	7	61080000	61100000	0.136065	-0.253917	0.389982	-	-	-	-	-
Maternal-restricted A compartments	7	68200000	68220000	0.144439	-0.228328	0.372767	-	-	-	-	-
Maternal-restricted A compartments	8	5240000	5260000	0.281647	-0.560867	0.842514	-	-	-	-	-
Maternal-restricted A compartments	8	84680000	84700000	0.352342	-0.38017	0.732511	-	-	-	-	-
Maternal-restricted A compartments	8	84760000	84780000	0.216827	-0.46844	0.685267	-	-	-	-	-
Maternal-restricted A compartments	8	84880000	84900000	0.345034	-0.372857	0.717891	-	-	-	-	-
Maternal-restricted A compartments	8	85500000	85520000	0.367984	-0.291726	0.659709	-	-	-	-	-
Maternal-restricted A compartments	8	88060000	88080000	0.405135	-0.336363	0.741498	-	-	-	-	-
Maternal-restricted A compartments	8	95140000	95160000	0.683161	-0.243534	0.926695	-	-	-	-	-
Maternal-restricted A compartments	8	95160000	95180000	0.59435	-0.248147	0.842497	-	-	-	-	-
Maternal-restricted A compartments	8	95300000	95320000	0.349585	-0.52957	0.879156	-	-	-	-	-
Maternal-restricted A compartments	8	95880000	95900000	0.213246	-0.417911	0.631157	-	-	-	-	-
Maternal-restricted A compartments	8	96020000	96040000	0.30722	-0.205625	0.512845	-	-	-	-	-
Maternal-restricted A compartments	8	99840000	99860000	0.286721	-0.200001	0.486721	-	-	-	-	-
Maternal-restricted A compartments	8	100060000	100080000	0.196397	-0.405295	0.601692	-	-	-	-	-
Maternal-restricted A compartments	8	100300000	100320000	0.146418	-0.370524	0.516942	-	-	-	-	-
Maternal-restricted A compartments	8	100320000	100340000	0.123606	-0.276875	0.400481	-	-	-	-	-
Maternal-restricted A compartments	8	100340000	100360000	0.199605	-0.255018	0.454623	-	-	-	-	-
Maternal-restricted A compartments	8	102360000	102380000	0.426166	-0.258533	0.684699	-	-	-	-	-
Maternal-restricted A compartments	8	103000000	103020000	0.191124	-0.436958	0.628081	-	-	-	-	-
Maternal-restricted A compartments	8	103080000	103100000	0.355115	-0.276805	0.63192	-	-	-	-	-
Maternal-restricted A compartments	8	108800000	108820000	0.341355	-0.413787	0.755142	-	-	-	-	-
Maternal-restricted A compartments	8	108820000	108840000	0.112016	-0.370372	0.482388	-	-	-	-	-
Maternal-restricted A compartments	8	111700000	111720000	0.294689	-0.290289	0.584978	-	-	-	-	-
Maternal-restricted A compartments	8	124520000	124540000	0.295427	-0.341837	0.637264	-	-	-	-	-
Maternal-restricted A compartments	8	129940000	129960000	0.550404	-0.630005	1.18041	-	-	-	-	-
Maternal-restricted A compartments	9	3540000	3560000	0.31606	-0.37756	0.69362	-	-	-	-	-
Maternal-restricted A compartments	9	31840000	31860000	0.0267376	-0.265472	0.292209	-	-	-	-	-
Maternal-restricted A compartments	9	50480000	50500000	0.352258	-0.250188	0.602447	-	-	-	-	-
Maternal-restricted A compartments	9	55580000	55600000	0.416476	-0.330279	0.746755	-	-	-	-	-
Maternal-restricted A compartments	9	74900000	74920000	0.10893	-0.127353	0.236283	-	-	-	-	-
Maternal-restricted A compartments	9	75620000	75640000	0.211843	-0.154117	0.36596	-	-	-	-	-
Maternal-restricted A compartments	9	75660000	75680000	0.101461	-0.138021	0.239482	-	-	-	-	-
Maternal-restricted A compartments	10	10440000	10460000	0.579977	-0.864997	1.44497	-	-	-	-	-
Maternal-restricted A compartments	13	40460000	40480000	0.13165	-0.368301	0.499951	-	-	-	-	-
Maternal-restricted A compartments	13	148560000	148580000	0.170385	-0.40385	0.574235	-	-	-	-	-
Maternal-restricted A compartments	14	33400000	33420000	0.183772	-0.394389	0.578162	-	-	-	-	-
Maternal-restricted A compartments	14	35000000	35020000	0.214982	-0.299796	0.514777	-	-	-	-	-
Maternal-restricted A compartments	14	36800000	36820000	0.217008	-0.342435	0.559442	-	-	-	-	-
Maternal-restricted A compartments	14	105240000	105260000	0.18763	-0.180702	0.368332	-	-	-	-	-
Maternal-restricted A compartments	14	140020000	140040000	0.247431	-0.715874	0.963305	-	-	-	-	-
Maternal-restricted A compartments	14	141640000	141660000	0.395461	-1.10453	1.49999	-	-	-	-	-
Maternal-restricted A compartments	15	17980000	18000000	0.168492	-0.948788	1.11728	-	-	-	-	-
Maternal-restricted A compartments	15	19500000	19520000	0.376834	-0.271026	0.64786	-	-	-	-	-
Maternal-restricted A compartments	15	82240000	82260000	0.133367	-0.142706	0.276072	-	-	-	-	-
Maternal-restricted A compartments	16	25120000	25140000	0.131647	-0.417225	0.548872	-	-	-	-	-
Maternal-restricted A compartments	17	14400000	14420000	0.521552	-0.472696	0.994249	-	-	-	-	-
Maternal-restricted A compartments	17	14420000	14440000	0.840869	-0.354107	1.19498	-	-	-	-	-
Maternal-restricted A compartments	17	14500000	14520000	0.514217	-0.36576	0.879977	-	-	-	-	-
Maternal-restricted A compartments	17	14540000	14560000	0.61439	-0.313792	0.928182	-	-	-	-	-
Maternal-restricted A compartments	17	14580000	14600000	0.698019	-0.221552	0.91957	-	-	-	-	-
Maternal-restricted A compartments	17	14620000	14640000	1.03445	-0.229966	1.26442	-	-	-	-	-
Maternal-restricted A compartments	17	14640000	14660000	0.761115	-0.600193	1.36131	-	-	-	-	-
Maternal-restricted A compartments	17	14660000	14680000	0.928551	-0.583961	1.51251	-	-	-	-	-
Maternal-restricted A compartments	17	14680000	14700000	0.64063	-1.08552	1.72615	-	-	-	-	-
Maternal-restricted A compartments	17	14700000	14720000	0.779986	-1.10384	1.88383	-	-	-	-	-
Maternal-restricted A compartments	17	14720000	14740000	0.65091	-1.22736	1.87827	-	-	-	-	-
Maternal-restricted A compartments	17	14760000	14780000	0.99818	-0.806255	1.80444	-	-	-	-	-
Maternal-restricted A compartments	17	14780000	14800000	1.37931	-0.503792	1.88311	-	-	-	-	-
Maternal-restricted A compartments	17	14800000	14820000	1.44431	-0.661672	2.10598	-	-	-	-	-
Maternal-restricted A compartments	17	14820000	14840000	1.22798	-0.699529	1.92751	-	-	-	-	-
Maternal-restricted A compartments	17	14840000	14860000	1.58369	-0.757788	2.34147	-	-	-	-	-
Maternal-restricted A compartments	17	14860000	14880000	1.64883	-0.699507	2.34833	-	-	-	-	-
Maternal-restricted A compartments	17	14880000	14900000	1.18644	-1.14767	2.33411	-	-	-	-	-
Maternal-restricted A compartments	17	57580000	57600000	0.131991	-0.208877	0.340868	-	-	-	-	-
Maternal-restricted A compartments	17	60140000	60160000	0.14277	-0.327143	0.469913	-	-	-	-	-
Maternal-restricted A compartments	18	7420000	7440000	0.207541	-0.135651	0.343191	-	-	-	-	-
Maternal-restricted A compartments	18	8740000	8760000	0.107677	-0.386607	0.494284	-	-	-	-	-
More active compartments in maternal	1	6780000	6800000	4.01285	3.50654	0.506312	-	-	-	-	-
More active compartments in maternal	1	7320000	7340000	4.59305	4.02005	0.572998	-	-	-	-	-
More active compartments in maternal	1	7380000	7400000	5.53449	4.77754	0.756949	-	-	-	-	-
More active compartments in maternal	1	7420000	7440000	5.89577	5.27309	0.622685	-	-	-	-	-
More active compartments in maternal	1	7500000	7520000	4.95935	4.43793	0.521423	-	-	-	-	-
More active compartments in maternal	1	14360000	14380000	1.1085	0.568771	0.539729	-	-	-	-	-
More active compartments in maternal	1	14820000	14840000	4.97462	4.4551	0.519522	-	-	-	-	-
More active compartments in maternal	2	1760000	1780000	3.87064	3.34327	0.527364	-	-	-	-	-
More active compartments in maternal	2	12020000	12040000	-2.45575	-3.47259	1.01684	-	-	-	-	-
More active compartments in maternal	2	14080000	14100000	-6.95576	-7.66486	0.709103	-	-	-	-	-
More active compartments in maternal	2	140140000	140160000	3.70484	3.1702	0.534639	-	-	-	-	-
More active compartments in maternal	2	144820000	144840000	1.55822	1.0139	0.544327	-	-	-	-	-
More active compartments in maternal	3	109780000	109800000	-2.0046	-2.51565	0.511048	-	-	-	-	-
More active compartments in maternal	3	109800000	109820000	-1.66766	-2.33931	0.67165	-	-	-	-	-
More active compartments in maternal	3	109860000	109880000	-1.53527	-2.08686	0.55159	-	-	-	-	-
More active compartments in maternal	3	109880000	109900000	-1.43483	-1.94838	0.513548	-	-	-	-	-
More active compartments in maternal	4	4780000	4800000	-4.08249	-4.66468	0.582193	-	-	-	-	-
More active compartments in maternal	5	40060000	40080000	-5.52945	-6.16717	0.637726	-	-	-	-	-
More active compartments in maternal	5	40080000	40100000	-5.66499	-6.38049	0.715492	-	-	-	-	-
More active compartments in maternal	5	76200000	76220000	-2.35733	-2.97781	0.62048	-	-	-	-	-
More active compartments in maternal	5	76260000	76280000	-2.65566	-3.18177	0.526115	-	-	-	-	-
More active compartments in maternal	5	96820000	96840000	-6.36704	-6.90111	0.534067	-	-	-	-	-
More active compartments in maternal	6	18780000	18800000	3.73196	3.2293	0.502663	-	-	-	-	-
More active compartments in maternal	6	38780000	38800000	-1.33144	-1.92926	0.597826	-	-	-	-	-
More active compartments in maternal	6	66040000	66060000	-3.03031	-3.60316	0.572854	-	-	-	-	-
More active compartments in maternal	6	66160000	66180000	-3.19989	-3.75508	0.555192	-	-	-	-	-
More active compartments in maternal	6	76480000	76500000	1.69964	1.09196	0.607678	-	-	-	-	-
More active compartments in maternal	6	151660000	151680000	-4.58218	-5.0884	0.506223	-	-	-	-	-
More active compartments in maternal	6	151880000	151900000	-5.08208	-5.73677	0.654688	-	-	-	-	-
More active compartments in maternal	6	153840000	153860000	-2.46539	-2.96718	0.50179	-	-	-	-	-
More active compartments in maternal	6	154040000	154060000	-4.33144	-4.84304	0.511599	-	-	-	-	-
More active compartments in maternal	6	156660000	156680000	-2.06213	-2.63149	0.569356	-	-	-	-	-
More active compartments in maternal	6	157240000	157260000	2.97714	2.46391	0.513229	-	-	-	-	-
More active compartments in maternal	7	22360000	22380000	-1.14912	-1.70597	0.556854	-	-	-	-	-
More active compartments in maternal	7	105680000	105700000	-5.38686	-5.94588	0.559014	-	-	-	-	-
More active compartments in maternal	8	56640000	56660000	-1.86619	-2.45275	0.586563	-	-	-	-	-
More active compartments in maternal	8	58180000	58200000	-2.5988	-3.21284	0.614048	-	-	-	-	-
More active compartments in maternal	8	67100000	67120000	-0.898658	-1.41154	0.512883	-	-	-	-	-
More active compartments in maternal	8	67120000	67140000	-0.909787	-1.50705	0.597259	-	-	-	-	-
More active compartments in maternal	8	68360000	68380000	0.939799	0.417409	0.52239	-	-	-	-	-
More active compartments in maternal	8	73560000	73580000	0.908303	0.383944	0.524359	-	-	-	-	-
More active compartments in maternal	8	97280000	97300000	-0.856593	-1.5226	0.666008	-	-	-	-	-
More active compartments in maternal	8	102700000	102720000	-2.10392	-2.63984	0.535926	-	-	-	-	-
More active compartments in maternal	8	104000000	104020000	-1.1396	-1.79142	0.651814	-	-	-	-	-
More active compartments in maternal	8	109580000	109600000	-1.69168	-2.19501	0.503332	-	-	-	-	-
More active compartments in maternal	8	109600000	109620000	-1.66311	-2.17978	0.516673	-	-	-	-	-
More active compartments in maternal	8	122940000	122960000	-1.67027	-2.28959	0.619323	-	-	-	-	-
More active compartments in maternal	8	126440000	126460000	-1.90191	-2.42529	0.523378	-	-	-	-	-
More active compartments in maternal	8	127740000	127760000	-1.22614	-1.73269	0.506558	-	-	-	-	-
More active compartments in maternal	8	129680000	129700000	-1.36597	-2.14823	0.782256	-	-	-	-	-
More active compartments in maternal	8	131100000	131120000	3.88685	3.34509	0.541761	-	-	-	-	-
More active compartments in maternal	8	131260000	131280000	3.48364	2.93905	0.54459	-	-	-	-	-
More active compartments in maternal	8	131360000	131380000	4.06613	3.54636	0.519769	-	-	-	-	-
More active compartments in maternal	8	131380000	131400000	4.36276	3.63659	0.726171	-	-	-	-	-
More active compartments in maternal	8	138940000	138960000	4.55895	3.94533	0.613624	-	-	-	-	-
More active compartments in maternal	8	138960000	138980000	4.6096	3.62916	0.980446	-	-	-	-	-
More active compartments in maternal	9	3680000	3700000	-2.33876	-3.08467	0.745909	-	-	-	-	-
More active compartments in maternal	9	4680000	4700000	-4.22531	-5.11568	0.890372	-	-	-	-	-
More active compartments in maternal	9	22100000	22120000	-4.24084	-4.83632	0.595477	-	-	-	-	-
More active compartments in maternal	9	22260000	22280000	-4.81802	-5.36804	0.550019	-	-	-	-	-
More active compartments in maternal	9	24860000	24880000	-3.81945	-4.34553	0.526086	-	-	-	-	-
More active compartments in maternal	9	24960000	24980000	-3.67467	-4.24424	0.569574	-	-	-	-	-
More active compartments in maternal	9	25000000	25020000	-3.51497	-4.33074	0.815771	-	-	-	-	-
More active compartments in maternal	9	25040000	25060000	-3.73276	-4.45119	0.718427	-	-	-	-	-
More active compartments in maternal	9	25060000	25080000	-3.71004	-4.47005	0.760014	-	-	-	-	-
More active compartments in maternal	9	25120000	25140000	-3.49566	-4.30954	0.813882	-	-	-	-	-
More active compartments in maternal	9	25160000	25180000	-3.54189	-4.28677	0.744883	-	-	-	-	-
More active compartments in maternal	9	25180000	25200000	-3.47603	-4.11037	0.634341	-	-	-	-	-
More active compartments in maternal	9	25200000	25220000	-3.61175	-4.16247	0.550721	-	-	-	-	-
More active compartments in maternal	9	25220000	25240000	-3.62315	-4.17049	0.54734	-	-	-	-	-
More active compartments in maternal	9	52720000	52740000	3.01531	2.40365	0.611656	-	-	-	-	-
More active compartments in maternal	9	132960000	132980000	-2.02911	-2.58982	0.560707	-	-	-	-	-
More active compartments in maternal	9	133000000	133020000	-1.26945	-1.78742	0.517971	-	-	-	-	-
More active compartments in maternal	9	133020000	133040000	-1.13761	-1.75564	0.618027	-	-	-	-	-
More active compartments in maternal	10	480000	500000	-3.30375	-4.0463	0.742542	-	-	-	-	-
More active compartments in maternal	10	580000	600000	-2.28683	-2.90218	0.615344	-	-	-	-	-
More active compartments in maternal	10	980000	1000000	-2.28711	-2.88258	0.595471	-	-	-	-	-
More active compartments in maternal	10	13200000	13220000	-1.5606	-2.1546	0.594004	-	-	-	-	-
More active compartments in maternal	10	16920000	16940000	-1.2549	-1.76518	0.510281	-	-	-	-	-
More active compartments in maternal	10	17160000	17180000	-1.88981	-2.39386	0.504043	-	-	-	-	-
More active compartments in maternal	10	18580000	18600000	-1.71537	-2.45819	0.742813	-	-	-	-	-
More active compartments in maternal	10	18620000	18640000	-1.80086	-2.31072	0.509866	-	-	-	-	-
More active compartments in maternal	10	18720000	18740000	-1.96314	-2.47596	0.51282	-	-	-	-	-
More active compartments in maternal	10	20140000	20160000	-2.92317	-3.4484	0.525227	-	-	-	-	-
More active compartments in maternal	10	22340000	22360000	-4.65787	-5.19416	0.536292	-	-	-	-	-
More active compartments in maternal	10	22720000	22740000	-1.84396	-2.40321	0.559253	-	-	-	-	-
More active compartments in maternal	10	64780000	64800000	2.74734	2.24637	0.500971	-	-	-	-	-
More active compartments in maternal	10	65020000	65040000	3.18218	2.55879	0.623394	-	-	-	-	-
More active compartments in maternal	11	9460000	9480000	1.75835	1.09399	0.664362	-	-	-	-	-
More active compartments in maternal	11	64520000	64540000	-2.07683	-2.95665	0.879813	-	-	-	-	-
More active compartments in maternal	11	74580000	74600000	-3.11701	-3.63513	0.518113	-	-	-	-	-
More active compartments in maternal	12	580000	600000	3.88636	3.35256	0.533795	-	-	-	-	-
More active compartments in maternal	12	35520000	35540000	1.771	1.11227	0.658722	-	-	-	-	-
More active compartments in maternal	13	6180000	6200000	-2.78573	-3.3383	0.552571	-	-	-	-	-
More active compartments in maternal	13	22780000	22800000	4.89166	4.34687	0.544798	-	-	-	-	-
More active compartments in maternal	13	71760000	71780000	6.1792	5.65429	0.524907	-	-	-	-	-
More active compartments in maternal	13	199680000	199700000	2.94732	2.14746	0.799862	-	-	-	-	-
More active compartments in maternal	13	205020000	205040000	5.24618	4.74009	0.506082	-	-	-	-	-
More active compartments in maternal	14	121640000	121660000	-1.54818	-2.1084	0.560223	-	-	-	-	-
More active compartments in maternal	17	52520000	52540000	1.68817	1.17855	0.50962	-	-	-	-	-
More active compartments in maternal	17	57340000	57360000	-1.07101	-1.65141	0.580408	-	-	-	-	-
Paternal-restricted A compartments	1	18560000	18580000	-0.176351	0.771297	-0.947648	-	-	-	-	-
Paternal-restricted A compartments	1	18580000	18600000	-0.398191	0.557915	-0.956107	-	-	-	-	-
Paternal-restricted A compartments	1	18780000	18800000	-0.284588	0.710814	-0.995402	-	-	-	-	-
Paternal-restricted A compartments	1	19700000	19720000	-0.251659	0.363077	-0.614736	-	-	-	-	-
Paternal-restricted A compartments	1	43680000	43700000	-0.0948819	0.257521	-0.352403	-	-	-	-	-
Paternal-restricted A compartments	1	49880000	49900000	-0.345308	0.253714	-0.599022	-	-	-	-	-
Paternal-restricted A compartments	1	54340000	54360000	-0.210705	0.314665	-0.525371	-	-	-	-	-
Paternal-restricted A compartments	1	122740000	122760000	-0.205601	0.345114	-0.550715	-	-	-	-	-
Paternal-restricted A compartments	1	187740000	187760000	-0.185324	0.432004	-0.617329	-	-	-	-	-
Paternal-restricted A compartments	1	189660000	189680000	-0.357731	0.365917	-0.723647	-	-	-	-	-
Paternal-restricted A compartments	1	189800000	189820000	-0.0368646	0.29742	-0.334284	-	-	-	-	-
Paternal-restricted A compartments	1	200640000	200660000	-0.571974	0.310334	-0.882308	-	-	-	-	-
Paternal-restricted A compartments	1	206040000	206060000	-0.1367	0.315978	-0.452678	-	-	-	-	-
Paternal-restricted A compartments	1	218420000	218440000	-0.306542	0.240229	-0.546771	-	-	-	-	-
Paternal-restricted A compartments	1	223380000	223400000	-0.232528	0.147676	-0.380204	-	-	-	-	-
Paternal-restricted A compartments	1	243080000	243100000	-0.217269	0.331277	-0.548546	-	-	-	-	-
Paternal-restricted A compartments	2	39040000	39060000	-0.189693	0.489593	-0.679286	-	-	-	-	-
Paternal-restricted A compartments	2	102780000	102800000	-0.170543	0.322262	-0.492805	-	-	-	-	-
Paternal-restricted A compartments	2	127060000	127080000	-0.306806	0.383762	-0.690568	-	-	-	-	-
Paternal-restricted A compartments	2	150000000	150020000	-0.0973554	0.690288	-0.787644	-	-	-	-	-
Paternal-restricted A compartments	3	6700000	6720000	-0.501589	0.369688	-0.871277	-	-	-	-	-
Paternal-restricted A compartments	3	14380000	14400000	-0.266762	0.278552	-0.545314	-	-	-	-	-
Paternal-restricted A compartments	3	25160000	25180000	-0.404361	0.339755	-0.744115	-	-	-	-	-
Paternal-restricted A compartments	3	52500000	52520000	-0.380919	0.211542	-0.592461	-	-	-	-	-
Paternal-restricted A compartments	3	52720000	52740000	-0.347316	0.347341	-0.694657	-	-	-	-	-
Paternal-restricted A compartments	3	59820000	59840000	-0.346716	0.20487	-0.551586	-	-	-	-	-
Paternal-restricted A compartments	3	86300000	86320000	-0.223572	0.279703	-0.503275	-	-	-	-	-
Paternal-restricted A compartments	4	78040000	78060000	-0.171083	0.384691	-0.555774	-	-	-	-	-
Paternal-restricted A compartments	4	120020000	120040000	-0.331298	0.214248	-0.545547	-	-	-	-	-
Paternal-restricted A compartments	4	125540000	125560000	-0.706968	0.335047	-1.04201	-	-	-	-	-
Paternal-restricted A compartments	4	125700000	125720000	-0.375848	0.345976	-0.721824	-	-	-	-	-
Paternal-restricted A compartments	4	129640000	129660000	-0.471144	0.405743	-0.876887	-	-	-	-	-
Paternal-restricted A compartments	5	59500000	59520000	-0.312627	0.385982	-0.698609	-	-	-	-	-
Paternal-restricted A compartments	5	62780000	62800000	-0.569936	0.425192	-0.995128	-	-	-	-	-
Paternal-restricted A compartments	5	77960000	77980000	-0.287109	0.300241	-0.58735	-	-	-	-	-
Paternal-restricted A compartments	5	77980000	78000000	-0.158939	0.28493	-0.443869	-	-	-	-	-
Paternal-restricted A compartments	5	78100000	78120000	-0.395704	0.54777	-0.943474	-	-	-	-	-
Paternal-restricted A compartments	5	93600000	93620000	-0.143518	0.385037	-0.528554	-	-	-	-	-
Paternal-restricted A compartments	6	7520000	7540000	-0.140344	0.572806	-0.71315	-	-	-	-	-
Paternal-restricted A compartments	6	57560000	57580000	-0.101746	0.232574	-0.33432	-	-	-	-	-
Paternal-restricted A compartments	6	57760000	57780000	-0.275408	0.279014	-0.554422	-	-	-	-	-
Paternal-restricted A compartments	6	57800000	57820000	-0.325223	0.296935	-0.622158	-	-	-	-	-
Paternal-restricted A compartments	6	60960000	60980000	-0.105575	0.740127	-0.845703	-	-	-	-	-
Paternal-restricted A compartments	6	61160000	61180000	-0.887999	0.429721	-1.31772	-	-	-	-	-
Paternal-restricted A compartments	6	61180000	61200000	-0.311555	0.591878	-0.903433	-	-	-	-	-
Paternal-restricted A compartments	6	61200000	61220000	-0.359677	0.859746	-1.21942	-	-	-	-	-
Paternal-restricted A compartments	6	61220000	61240000	-0.350993	1.01796	-1.36895	-	-	-	-	-
Paternal-restricted A compartments	6	61240000	61260000	-0.349636	1.12148	-1.47112	-	-	-	-	-
Paternal-restricted A compartments	6	61260000	61280000	-0.179211	1.22029	-1.39951	-	-	-	-	-
Paternal-restricted A compartments	6	61380000	61400000	-0.216417	1.41202	-1.62843	-	-	-	-	-
Paternal-restricted A compartments	7	5420000	5440000	-0.373021	0.34958	-0.722601	-	-	-	-	-
Paternal-restricted A compartments	7	9220000	9240000	-0.367164	0.782487	-1.14965	-	-	-	-	-
Paternal-restricted A compartments	7	12840000	12860000	-0.273517	0.224194	-0.497711	-	-	-	-	-
Paternal-restricted A compartments	7	12920000	12940000	-0.283959	0.178335	-0.462294	-	-	-	-	-
Paternal-restricted A compartments	7	68420000	68440000	-0.284484	0.263903	-0.548387	-	-	-	-	-
Paternal-restricted A compartments	7	78180000	78200000	-0.410241	0.490679	-0.900919	-	-	-	-	-
Paternal-restricted A compartments	7	90000000	90020000	-0.323783	0.353124	-0.676908	-	-	-	-	-
Paternal-restricted A compartments	7	115500000	115520000	-0.240217	0.237292	-0.477509	-	-	-	-	-
Paternal-restricted A compartments	8	6180000	6200000	-0.28813	0.664146	-0.952276	-	-	-	-	-
Paternal-restricted A compartments	8	6220000	6240000	-0.19534	0.311799	-0.507139	-	-	-	-	-
Paternal-restricted A compartments	8	6260000	6280000	-0.388292	0.842921	-1.23121	-	-	-	-	-
Paternal-restricted A compartments	8	9060000	9080000	-0.61858	0.299306	-0.917886	-	-	-	-	-
Paternal-restricted A compartments	8	11640000	11660000	-0.172596	0.429757	-0.602353	-	-	-	-	-
Paternal-restricted A compartments	8	35180000	35200000	-0.2419	0.525172	-0.767072	-	-	-	-	-
Paternal-restricted A compartments	8	37720000	37740000	-0.593847	0.252526	-0.846373	-	-	-	-	-
Paternal-restricted A compartments	8	37740000	37760000	-0.563424	0.176128	-0.739551	-	-	-	-	-
Paternal-restricted A compartments	8	41220000	41240000	-0.301339	0.568335	-0.869674	-	-	-	-	-
Paternal-restricted A compartments	8	41440000	41460000	-0.299638	0.549586	-0.849224	-	-	-	-	-
Paternal-restricted A compartments	8	41460000	41480000	-0.339326	0.59378	-0.933107	-	-	-	-	-
Paternal-restricted A compartments	8	41480000	41500000	-0.49748	0.543082	-1.04056	-	-	-	-	-
Paternal-restricted A compartments	8	41580000	41600000	-0.53379	0.349689	-0.88348	-	-	-	-	-
Paternal-restricted A compartments	8	41680000	41700000	-0.58458	0.329174	-0.913753	-	-	-	-	-
Paternal-restricted A compartments	8	48260000	48280000	-0.673693	0.495664	-1.16936	-	-	-	-	-
Paternal-restricted A compartments	9	1280000	1300000	-0.351844	0.535275	-0.887119	-	-	-	-	-
Paternal-restricted A compartments	9	55420000	55440000	-0.184172	0.245029	-0.429201	-	-	-	-	-
Paternal-restricted A compartments	9	55680000	55700000	-0.318918	0.382033	-0.700952	-	-	-	-	-
Paternal-restricted A compartments	9	55780000	55800000	-0.291439	0.419888	-0.711328	-	-	-	-	-
Paternal-restricted A compartments	9	74400000	74420000	-0.253259	0.338383	-0.591642	-	-	-	-	-
Paternal-restricted A compartments	9	74420000	74440000	-0.255013	0.385586	-0.640599	-	-	-	-	-
Paternal-restricted A compartments	9	74480000	74500000	-0.595096	0.150228	-0.745324	-	-	-	-	-
Paternal-restricted A compartments	9	92640000	92660000	-0.633682	0.16722	-0.800902	-	-	-	-	-
Paternal-restricted A compartments	9	127460000	127480000	-0.198643	0.235281	-0.433924	-	-	-	-	-
Paternal-restricted A compartments	10	60520000	60540000	-0.728055	0.740964	-1.46902	-	-	-	-	-
Paternal-restricted A compartments	10	60560000	60580000	-0.932062	0.882923	-1.81499	-	-	-	-	-
Paternal-restricted A compartments	11	10140000	10160000	-0.433713	0.147647	-0.58136	-	-	-	-	-
Paternal-restricted A compartments	12	13280000	13300000	-0.227828	0.26379	-0.491618	-	-	-	-	-
Paternal-restricted A compartments	12	39300000	39320000	-0.187045	0.221387	-0.408432	-	-	-	-	-
Paternal-restricted A compartments	13	11580000	11600000	-0.275638	0.645088	-0.920726	-	-	-	-	-
Paternal-restricted A compartments	13	12740000	12760000	-0.399728	0.307846	-0.707575	-	-	-	-	-
Paternal-restricted A compartments	13	17100000	17120000	-0.112195	0.41427	-0.526466	-	-	-	-	-
Paternal-restricted A compartments	13	44860000	44880000	-0.253818	0.166186	-0.420004	-	-	-	-	-
Paternal-restricted A compartments	13	46080000	46100000	-0.184405	0.776213	-0.960618	-	-	-	-	-
Paternal-restricted A compartments	13	46120000	46140000	-0.302643	0.682982	-0.985626	-	-	-	-	-
Paternal-restricted A compartments	13	46460000	46480000	-0.380319	0.528839	-0.909158	-	-	-	-	-
Paternal-restricted A compartments	13	46860000	46880000	-0.271997	0.31833	-0.590327	-	-	-	-	-
Paternal-restricted A compartments	13	91040000	91060000	-0.252912	0.524946	-0.777858	-	-	-	-	-
Paternal-restricted A compartments	13	99760000	99780000	-0.266739	0.612318	-0.879057	-	-	-	-	-
Paternal-restricted A compartments	13	129920000	129940000	-0.0611057	0.569545	-0.630651	-	-	-	-	-
Paternal-restricted A compartments	13	181380000	181400000	-0.237713	0.260116	-0.497829	-	-	-	-	-
Paternal-restricted A compartments	14	2500000	2520000	-0.382545	0.296756	-0.679301	-	-	-	-	-
Paternal-restricted A compartments	14	14500000	14520000	-0.226995	0.358622	-0.585618	-	-	-	-	-
Paternal-restricted A compartments	14	14640000	14660000	-0.12189	0.487099	-0.608989	-	-	-	-	-
Paternal-restricted A compartments	14	20040000	20060000	-0.375914	0.149025	-0.524939	-	-	-	-	-
Paternal-restricted A compartments	14	20700000	20720000	-0.262028	0.194117	-0.456145	-	-	-	-	-
Paternal-restricted A compartments	14	61060000	61080000	-0.115722	0.412113	-0.527835	-	-	-	-	-
Paternal-restricted A compartments	14	61400000	61420000	-0.415561	0.33435	-0.749911	-	-	-	-	-
Paternal-restricted A compartments	14	77820000	77840000	-0.431208	0.220549	-0.651756	-	-	-	-	-
Paternal-restricted A compartments	14	100520000	100540000	-0.100096	0.22317	-0.323267	-	-	-	-	-
Paternal-restricted A compartments	14	124880000	124900000	-0.342202	0.473108	-0.81531	-	-	-	-	-
Paternal-restricted A compartments	14	124940000	124960000	-0.469061	0.133478	-0.602539	-	-	-	-	-
Paternal-restricted A compartments	15	8320000	8340000	-0.301033	0.339225	-0.640258	-	-	-	-	-
Paternal-restricted A compartments	15	37700000	37720000	-0.241747	0.247277	-0.489024	-	-	-	-	-
Paternal-restricted A compartments	15	75220000	75240000	-0.205739	0.0909791	-0.296718	-	-	-	-	-
Paternal-restricted A compartments	15	82880000	82900000	-0.1275	0.2099	-0.3374	-	-	-	-	-
Paternal-restricted A compartments	15	96200000	96220000	-0.185944	0.323749	-0.509693	-	-	-	-	-
Paternal-restricted A compartments	15	109620000	109640000	-0.312711	0.644262	-0.956972	-	-	-	-	-
Paternal-restricted A compartments	15	109640000	109660000	-0.283711	0.615376	-0.899087	-	-	-	-	-
Paternal-restricted A compartments	15	109940000	109960000	-0.151652	0.36408	-0.515732	-	-	-	-	-
Paternal-restricted A compartments	15	110140000	110160000	-0.0965678	0.488236	-0.584804	-	-	-	-	-
Paternal-restricted A compartments	15	124480000	124500000	-0.294706	0.447558	-0.742263	-	-	-	-	-
Paternal-restricted A compartments	16	49160000	49180000	-0.0715578	0.271836	-0.343394	-	-	-	-	-
Paternal-restricted A compartments	16	53560000	53580000	-0.129797	0.227171	-0.356968	-	-	-	-	-
Paternal-restricted A compartments	16	63600000	63620000	-0.26051	0.589207	-0.849717	-	-	-	-	-
Paternal-restricted A compartments	17	13800000	13820000	-1.77109	0.565679	-2.33677	-	-	-	-	-
Paternal-restricted A compartments	17	13820000	13840000	-1.85899	0.301709	-2.1607	-	-	-	-	-
Paternal-restricted A compartments	17	13880000	13900000	-1.48598	0.363	-1.84898	-	-	-	-	-
Paternal-restricted A compartments	17	13900000	13920000	-1.39453	0.407168	-1.8017	-	-	-	-	-
Paternal-restricted A compartments	17	13920000	13940000	-1.34962	0.307792	-1.65741	-	-	-	-	-
Paternal-restricted A compartments	17	13940000	13960000	-1.17824	0.232887	-1.41113	-	-	-	-	-
Paternal-restricted A compartments	17	13960000	13980000	-1.43568	0.345681	-1.78136	-	-	-	-	-
Paternal-restricted A compartments	17	13980000	14000000	-1.45215	0.381327	-1.83347	-	-	-	-	-
Paternal-restricted A compartments	18	43080000	43100000	-0.282382	0.647623	-0.930006	-	-	-	-	-
More active compartments in paternal	1	21260000	21280000	1.47256	2.23324	-0.760675	-	-	-	-	-
More active compartments in paternal	1	21300000	21320000	1.3185	1.88793	-0.569429	ENSSSCG00000004127	PLAGL1	0.03	1.72	0.017
More active compartments in paternal	1	21320000	21340000	1.0898	1.64672	-0.55692	-	-	-	-	-
More active compartments in paternal	1	142080000	142100000	-2.80539	-1.90755	-0.897842	-	-	-	-	-
More active compartments in paternal	1	142100000	142120000	-4.95612	-2.76944	-2.18668	-	-	-	-	-
More active compartments in paternal	1	142120000	142140000	-4.76455	-2.80902	-1.95552	-	-	-	-	-
More active compartments in paternal	1	142140000	142160000	-4.72088	-2.51359	-2.2073	-	-	-	-	-
More active compartments in paternal	1	142160000	142180000	-5.15548	-2.3941	-2.76138	-	-	-	-	-
More active compartments in paternal	1	142180000	142200000	-4.63705	-2.23654	-2.40051	-	-	-	-	-
More active compartments in paternal	1	142200000	142220000	-2.13593	-0.988193	-1.14774	-	-	-	-	-
More active compartments in paternal	1	142220000	142240000	-4.57427	-1.70967	-2.8646	-	-	-	-	-
More active compartments in paternal	1	142240000	142260000	-4.2364	-1.60717	-2.62923	-	-	-	-	-
More active compartments in paternal	1	142260000	142280000	-4.41364	-1.81114	-2.6025	-	-	-	-	-
More active compartments in paternal	1	142280000	142300000	-4.70119	-2.07622	-2.62496	-	-	-	-	-
More active compartments in paternal	1	142300000	142320000	-4.82541	-2.34201	-2.4834	-	-	-	-	-
More active compartments in paternal	1	142320000	142340000	-4.85452	-2.56574	-2.28878	-	-	-	-	-
More active compartments in paternal	1	142340000	142360000	-4.84831	-2.65237	-2.19595	-	-	-	-	-
More active compartments in paternal	1	142360000	142380000	-4.96976	-2.60857	-2.3612	-	-	-	-	-
More active compartments in paternal	1	142380000	142400000	-4.98234	-2.43854	-2.5438	-	-	-	-	-
More active compartments in paternal	1	142400000	142420000	-4.64288	-2.16517	-2.47771	ENSSSCG00000004834	NDN	0.2	47	0.004
More active compartments in paternal	1	142420000	142440000	-4.52234	-1.91999	-2.60235	-	-	-	-	-
More active compartments in paternal	1	142440000	142460000	-4.15362	-1.89517	-2.25845	ENSSSCG00000004835	MAGEL2	0.43	1.48	0.22
More active compartments in paternal	1	142460000	142480000	-4.07568	-1.761	-2.31468	-	-	-	-	-
More active compartments in paternal	1	142480000	142500000	-4.11006	-1.89543	-2.21463	-	-	-	-	-
More active compartments in paternal	1	142500000	142520000	-4.02215	-1.92755	-2.0946	ENSSSCG00000004836	MKRN3	0.03	1.92	0.017
More active compartments in paternal	1	142520000	142540000	-3.90396	-2.12905	-1.77491	-	-	-	-	-
More active compartments in paternal	1	142540000	142560000	-3.83546	-2.2461	-1.58936	-	-	-	-	-
More active compartments in paternal	1	142560000	142580000	-3.75924	-2.48727	-1.27197	-	-	-	-	-
More active compartments in paternal	1	142580000	142600000	-4.12797	-3.11075	-1.01723	-	-	-	-	-
More active compartments in paternal	1	142600000	142620000	-4.63344	-3.92375	-0.709695	-	-	-	-	-
More active compartments in paternal	1	142640000	142660000	-4.79869	-4.19524	-0.603455	-	-	-	-	-
More active compartments in paternal	1	142660000	142680000	-4.76984	-4.16594	-0.603895	-	-	-	-	-
More active compartments in paternal	1	142680000	142700000	-4.80083	-4.24269	-0.55814	-	-	-	-	-
More active compartments in paternal	1	142700000	142720000	-4.5233	-3.92135	-0.601953	-	-	-	-	-
More active compartments in paternal	1	142720000	142740000	-4.44395	-3.87855	-0.565398	-	-	-	-	-
More active compartments in paternal	1	142780000	142800000	-4.47972	-3.82065	-0.659063	-	-	-	-	-
More active compartments in paternal	1	142800000	142820000	-4.50548	-3.97144	-0.534041	-	-	-	-	-
More active compartments in paternal	1	142820000	142840000	-4.45688	-3.91983	-0.537054	-	-	-	-	-
More active compartments in paternal	1	142840000	142860000	-4.55467	-3.67786	-0.876811	-	-	-	-	-
More active compartments in paternal	1	142860000	142880000	-4.48238	-3.87658	-0.605793	-	-	-	-	-
More active compartments in paternal	1	142880000	142900000	-4.39378	-3.74129	-0.652496	-	-	-	-	-
More active compartments in paternal	1	142940000	142960000	-4.32342	-3.71136	-0.612064	-	-	-	-	-
More active compartments in paternal	1	142980000	143000000	-4.30396	-3.79778	-0.506185	-	-	-	-	-
More active compartments in paternal	1	143040000	143060000	-3.49606	-2.84367	-0.652391	-	-	-	-	-
More active compartments in paternal	1	262580000	262600000	-6.25912	-5.39938	-0.85974	-	-	-	-	-
More active compartments in paternal	2	940000	960000	4.99711	5.59189	-0.594772	-	-	-	-	-
More active compartments in paternal	2	1380000	1400000	3.65515	4.59447	-0.939319	ENSSSCG00000050649	H19	3138.33	32.32	0.99
More active compartments in paternal	2	44320000	44340000	-1.9228	-1.38514	-0.537664	-	-	-	-	-
More active compartments in paternal	2	62820000	62840000	-8.2782	-6.89043	-1.38777	-	-	-	-	-
More active compartments in paternal	3	4360000	4380000	3.92193	4.44764	-0.525709	-	-	-	-	-
More active compartments in paternal	3	4400000	4420000	3.78922	4.38595	-0.596723	-	-	-	-	-
More active compartments in paternal	3	4480000	4500000	3.81286	4.43328	-0.620423	-	-	-	-	-
More active compartments in paternal	4	48140000	48160000	-4.89512	-4.0528	-0.842322	-	-	-	-	-
More active compartments in paternal	4	113960000	113980000	-5.74753	-5.23277	-0.514765	-	-	-	-	-
More active compartments in paternal	5	1600000	1620000	1.25125	1.86558	-0.614328	-	-	-	-	-
More active compartments in paternal	5	2280000	2300000	1.50957	2.03193	-0.522354	-	-	-	-	-
More active compartments in paternal	5	40220000	40240000	-7.33098	-6.29358	-1.03741	-	-	-	-	-
More active compartments in paternal	6	3020000	3040000	3.98237	4.48247	-0.500096	-	-	-	-	-
More active compartments in paternal	6	50100000	50120000	3.50237	4.07448	-0.572114	-	-	-	-	-
More active compartments in paternal	6	61420000	61440000	0.293937	1.43316	-1.13922	-	-	-	-	-
More active compartments in paternal	6	61480000	61500000	0.395478	1.01079	-0.615309	-	-	-	-	-
More active compartments in paternal	6	61520000	61540000	0.765049	1.32676	-0.56171	-	-	-	-	-
More active compartments in paternal	6	166040000	166060000	4.70884	5.29472	-0.58588	-	-	-	-	-
More active compartments in paternal	7	79140000	79160000	-8.35951	-7.83191	-0.527598	-	-	-	-	-
More active compartments in paternal	7	113040000	113060000	2.48332	3.0166	-0.533283	-	-	-	-	-
More active compartments in paternal	8	3340000	3360000	1.89096	2.67824	-0.78728	-	-	-	-	-
More active compartments in paternal	8	4400000	4420000	3.22773	3.76496	-0.537228	-	-	-	-	-
More active compartments in paternal	8	5900000	5920000	3.611	4.26713	-0.656128	-	-	-	-	-
More active compartments in paternal	8	6000000	6020000	3.01455	3.73824	-0.723684	-	-	-	-	-
More active compartments in paternal	8	6020000	6040000	2.9289	3.54056	-0.611654	-	-	-	-	-
More active compartments in paternal	8	6040000	6060000	2.93564	3.46294	-0.527293	-	-	-	-	-
More active compartments in paternal	8	6060000	6080000	2.97282	3.63621	-0.663396	-	-	-	-	-
More active compartments in paternal	8	6340000	6360000	1.00056	1.70047	-0.69991	-	-	-	-	-
More active compartments in paternal	8	6380000	6400000	1.32306	1.97446	-0.651403	-	-	-	-	-
More active compartments in paternal	8	6400000	6420000	1.55211	2.22052	-0.668415	-	-	-	-	-
More active compartments in paternal	8	11220000	11240000	1.93632	2.45411	-0.517791	-	-	-	-	-
More active compartments in paternal	8	15980000	16000000	-3.50602	-2.98259	-0.523429	-	-	-	-	-
More active compartments in paternal	8	19100000	19120000	2.44286	3.07021	-0.627353	-	-	-	-	-
More active compartments in paternal	8	20740000	20760000	-2.18753	-1.50419	-0.683344	-	-	-	-	-
More active compartments in paternal	8	20840000	20860000	-2.7913	-2.00823	-0.783068	-	-	-	-	-
More active compartments in paternal	8	20860000	20880000	-2.6426	-2.01943	-0.623174	-	-	-	-	-
More active compartments in paternal	8	21000000	21020000	-3.30505	-2.72358	-0.581468	-	-	-	-	-
More active compartments in paternal	8	21040000	21060000	-3.41321	-2.84929	-0.563918	-	-	-	-	-
More active compartments in paternal	8	21140000	21160000	-3.43178	-2.90873	-0.523054	-	-	-	-	-
More active compartments in paternal	8	23600000	23620000	-2.16089	-1.61229	-0.548594	-	-	-	-	-
More active compartments in paternal	8	23740000	23760000	-2.40222	-1.82953	-0.572689	-	-	-	-	-
More active compartments in paternal	8	25360000	25380000	-4.03514	-3.52393	-0.511209	-	-	-	-	-
More active compartments in paternal	8	25460000	25480000	-4.27543	-3.74691	-0.528522	-	-	-	-	-
More active compartments in paternal	8	28160000	28180000	-3.0409	-2.44132	-0.599576	-	-	-	-	-
More active compartments in paternal	8	34340000	34360000	-4.25054	-3.74331	-0.50723	-	-	-	-	-
More active compartments in paternal	8	38300000	38320000	2.08603	2.64488	-0.558845	-	-	-	-	-
More active compartments in paternal	8	42660000	42680000	-3.54723	-3.00785	-0.53938	-	-	-	-	-
More active compartments in paternal	8	47280000	47300000	-2.91608	-2.37492	-0.541165	-	-	-	-	-
More active compartments in paternal	8	48520000	48540000	-4.085	-3.49522	-0.58978	-	-	-	-	-
More active compartments in paternal	8	48600000	48620000	-3.98209	-3.4521	-0.529985	-	-	-	-	-
More active compartments in paternal	8	48900000	48920000	-4.69266	-4.13014	-0.562514	-	-	-	-	-
More active compartments in paternal	8	49000000	49020000	-4.99399	-4.38985	-0.604144	-	-	-	-	-
More active compartments in paternal	8	53940000	53960000	-3.00332	-2.27081	-0.732511	-	-	-	-	-
More active compartments in paternal	9	14560000	14580000	-5.02008	-4.45519	-0.564889	-	-	-	-	-
More active compartments in paternal	9	69900000	69920000	-4.5062	-3.89568	-0.61052	-	-	-	-	-
More active compartments in paternal	10	2060000	2080000	-4.9379	-4.39555	-0.542346	-	-	-	-	-
More active compartments in paternal	10	3180000	3200000	-4.88299	-4.24283	-0.640169	-	-	-	-	-
More active compartments in paternal	10	25200000	25220000	2.53658	3.26903	-0.73245	-	-	-	-	-
More active compartments in paternal	10	26080000	26100000	2.5844	3.0999	-0.515497	-	-	-	-	-
More active compartments in paternal	10	29320000	29340000	2.91858	3.57796	-0.659377	-	-	-	-	-
More active compartments in paternal	10	30740000	30760000	1.72919	2.25892	-0.529733	-	-	-	-	-
More active compartments in paternal	10	38900000	38920000	1.52596	2.07872	-0.552758	-	-	-	-	-
More active compartments in paternal	12	29600000	29620000	-6.85927	-6.12882	-0.730452	-	-	-	-	-
More active compartments in paternal	13	57460000	57480000	-3.84479	-3.31183	-0.532963	-	-	-	-	-
More active compartments in paternal	13	90840000	90860000	1.53772	2.05298	-0.515263	-	-	-	-	-
More active compartments in paternal	13	90880000	90900000	0.736234	1.24901	-0.512771	-	-	-	-	-
More active compartments in paternal	13	161880000	161900000	-4.43045	-3.8025	-0.627952	-	-	-	-	-
More active compartments in paternal	14	780000	800000	-2.19247	-1.63688	-0.555589	-	-	-	-	-
More active compartments in paternal	14	800000	820000	-1.89582	-1.27244	-0.623373	-	-	-	-	-
More active compartments in paternal	14	140380000	140400000	2.47843	3.03852	-0.560085	-	-	-	-	-
More active compartments in paternal	15	109740000	109760000	-1.34373	-0.679806	-0.663922	-	-	-	-	-
More active compartments in paternal	15	120640000	120660000	3.08759	3.6885	-0.600902	-	-	-	-	-
More active compartments in paternal	16	48260000	48280000	-0.842344	-0.290913	-0.55143	-	-	-	-	-
More active compartments in paternal	17	580000	600000	-3.6846	-3.17343	-0.511171	-	-	-	-	-
More active compartments in paternal	17	13600000	13620000	-4.44873	-3.86077	-0.587966	-	-	-	-	-
More active compartments in paternal	17	13620000	13640000	-3.88738	-2.61235	-1.27503	-	-	-	-	-
More active compartments in paternal	17	13640000	13660000	-3.01776	-0.912633	-2.10513	-	-	-	-	-
More active compartments in paternal	17	15020000	15040000	-4.67809	-4.01115	-0.666938	-	-	-	-	-
More active compartments in paternal	17	15060000	15080000	-4.3409	-3.47388	-0.867018	-	-	-	-	-
More active compartments in paternal	17	15140000	15160000	-4.84789	-4.32776	-0.52013	-	-	-	-	-

## Sheet: Sheet 3 (Muscle)
Differential compartments between parent-of-origin	Chromosome	Start	End	Mean A-B index of maternal	Mean A-B index of paternal	ΔA-B index (maternal vs. paternal)	Ensembl ID of known imprinted gene	Symbol of known imprinted gene	Mean maternal TPM	Mean paternal TPM	Allelic expression ratio of maternal allele
Maternal-restricted A compartments	1	3560000	3580000	0.516765	-0.449513	0.966278	-	-	-	-	-
Maternal-restricted A compartments	1	32080000	32100000	0.0900185	-0.342072	0.43209	-	-	-	-	-
Maternal-restricted A compartments	1	32120000	32140000	0.14417	-0.223569	0.367739	-	-	-	-	-
Maternal-restricted A compartments	1	35700000	35720000	0.390369	-0.383424	0.773793	-	-	-	-	-
Maternal-restricted A compartments	1	104620000	104640000	0.431425	-0.0842036	0.515628	-	-	-	-	-
Maternal-restricted A compartments	1	105600000	105620000	0.219076	-0.176343	0.395419	-	-	-	-	-
Maternal-restricted A compartments	1	145300000	145320000	0.193066	-0.215283	0.408349	-	-	-	-	-
Maternal-restricted A compartments	1	148240000	148260000	0.311012	-0.0821338	0.393145	-	-	-	-	-
Maternal-restricted A compartments	1	148260000	148280000	0.448562	-0.234888	0.68345	-	-	-	-	-
Maternal-restricted A compartments	1	148640000	148660000	0.388275	-0.32549	0.713765	-	-	-	-	-
Maternal-restricted A compartments	1	194840000	194860000	0.183022	-0.428044	0.611066	-	-	-	-	-
Maternal-restricted A compartments	1	201620000	201640000	0.304251	-0.105032	0.409283	-	-	-	-	-
Maternal-restricted A compartments	1	215680000	215700000	0.153106	-0.157394	0.3105	-	-	-	-	-
Maternal-restricted A compartments	1	229600000	229620000	0.270585	-0.351306	0.621892	-	-	-	-	-
Maternal-restricted A compartments	1	234060000	234080000	0.217599	-0.28524	0.502839	-	-	-	-	-
Maternal-restricted A compartments	1	237360000	237380000	0.511953	-0.238345	0.750298	-	-	-	-	-
Maternal-restricted A compartments	1	240120000	240140000	0.413295	-0.183056	0.596351	-	-	-	-	-
Maternal-restricted A compartments	1	240420000	240440000	0.249046	-0.584068	0.833114	-	-	-	-	-
Maternal-restricted A compartments	1	260460000	260480000	0.464819	-0.159077	0.623896	-	-	-	-	-
Maternal-restricted A compartments	2	36800000	36820000	0.170626	-0.494267	0.664893	-	-	-	-	-
Maternal-restricted A compartments	2	65440000	65460000	0.108981	-0.246432	0.355413	-	-	-	-	-
Maternal-restricted A compartments	2	72480000	72500000	0.164759	-0.139753	0.304511	-	-	-	-	-
Maternal-restricted A compartments	2	81960000	81980000	0.38564	-0.354682	0.740322	-	-	-	-	-
Maternal-restricted A compartments	2	81980000	82000000	0.435168	-0.361744	0.796913	-	-	-	-	-
Maternal-restricted A compartments	2	84700000	84720000	0.234546	-0.130444	0.36499	-	-	-	-	-
Maternal-restricted A compartments	2	113100000	113120000	0.283	-0.148265	0.431265	-	-	-	-	-
Maternal-restricted A compartments	2	126900000	126920000	0.299606	-0.166052	0.465658	-	-	-	-	-
Maternal-restricted A compartments	3	2500000	2520000	0.441287	-0.302588	0.743875	-	-	-	-	-
Maternal-restricted A compartments	3	2840000	2860000	0.5364	-0.256741	0.793141	-	-	-	-	-
Maternal-restricted A compartments	3	2940000	2960000	0.641573	-0.36165	1.00322	-	-	-	-	-
Maternal-restricted A compartments	3	55120000	55140000	0.439176	-0.376498	0.815674	-	-	-	-	-
Maternal-restricted A compartments	3	70700000	70720000	0.408198	-0.34886	0.757058	-	-	-	-	-
Maternal-restricted A compartments	3	78320000	78340000	0.180817	-0.225238	0.406056	-	-	-	-	-
Maternal-restricted A compartments	3	128800000	128820000	0.113425	-0.22695	0.340375	-	-	-	-	-
Maternal-restricted A compartments	3	131480000	131500000	0.363067	-0.53979	0.902857	-	-	-	-	-
Maternal-restricted A compartments	3	131660000	131680000	0.0786362	-0.52037	0.599006	-	-	-	-	-
Maternal-restricted A compartments	3	132120000	132140000	0.264215	-0.20713	0.471345	-	-	-	-	-
Maternal-restricted A compartments	4	17520000	17540000	0.103339	-0.140792	0.244131	-	-	-	-	-
Maternal-restricted A compartments	4	17820000	17840000	0.2304	-0.140101	0.370501	-	-	-	-	-
Maternal-restricted A compartments	4	17900000	17920000	0.0853474	-0.128692	0.214039	-	-	-	-	-
Maternal-restricted A compartments	4	31620000	31640000	0.144436	-0.293522	0.437957	-	-	-	-	-
Maternal-restricted A compartments	4	39940000	39960000	0.253667	-0.557363	0.81103	-	-	-	-	-
Maternal-restricted A compartments	4	101620000	101640000	0.211631	-0.482542	0.694173	-	-	-	-	-
Maternal-restricted A compartments	4	101740000	101760000	0.23434	-0.459519	0.693859	-	-	-	-	-
Maternal-restricted A compartments	5	101460000	101480000	0.738146	-0.649791	1.38794	-	-	-	-	-
Maternal-restricted A compartments	6	7300000	7320000	0.522503	-0.428869	0.951372	-	-	-	-	-
Maternal-restricted A compartments	6	7540000	7560000	0.286357	-0.777077	1.06343	-	-	-	-	-
Maternal-restricted A compartments	6	7720000	7740000	0.506271	-0.400995	0.907265	-	-	-	-	-
Maternal-restricted A compartments	6	7740000	7760000	0.210791	-0.398428	0.609219	-	-	-	-	-
Maternal-restricted A compartments	6	31660000	31680000	0.269808	-0.166857	0.436665	-	-	-	-	-
Maternal-restricted A compartments	6	41380000	41400000	0.254193	-0.346888	0.60108	-	-	-	-	-
Maternal-restricted A compartments	6	76460000	76480000	0.822397	-0.441235	1.26363	-	-	-	-	-
Maternal-restricted A compartments	6	76520000	76540000	0.733647	-0.76633	1.49998	-	-	-	-	-
Maternal-restricted A compartments	6	76540000	76560000	0.565538	-0.507282	1.07282	-	-	-	-	-
Maternal-restricted A compartments	6	76620000	76640000	0.595873	-0.576047	1.17192	-	-	-	-	-
Maternal-restricted A compartments	6	76640000	76660000	0.676856	-0.43139	1.10825	-	-	-	-	-
Maternal-restricted A compartments	6	86880000	86900000	0.494538	-0.173992	0.66853	-	-	-	-	-
Maternal-restricted A compartments	6	105900000	105920000	0.243535	-0.227682	0.471218	-	-	-	-	-
Maternal-restricted A compartments	6	118780000	118800000	0.252432	-0.214564	0.466996	-	-	-	-	-
Maternal-restricted A compartments	6	156740000	156760000	0.0848063	-0.600767	0.685574	-	-	-	-	-
Maternal-restricted A compartments	6	156760000	156780000	0.162861	-0.473812	0.636673	-	-	-	-	-
Maternal-restricted A compartments	7	8380000	8400000	0.287466	-0.0963162	0.383782	-	-	-	-	-
Maternal-restricted A compartments	7	15940000	15960000	0.204485	-0.0902575	0.294743	-	-	-	-	-
Maternal-restricted A compartments	7	16160000	16180000	0.115674	-0.298216	0.41389	-	-	-	-	-
Maternal-restricted A compartments	7	16360000	16380000	0.109742	-0.534974	0.644716	-	-	-	-	-
Maternal-restricted A compartments	7	16380000	16400000	0.223229	-0.22848	0.451709	-	-	-	-	-
Maternal-restricted A compartments	7	16860000	16880000	0.175661	-0.191722	0.367383	-	-	-	-	-
Maternal-restricted A compartments	7	28480000	28500000	0.305051	-0.272671	0.577722	-	-	-	-	-
Maternal-restricted A compartments	7	87860000	87880000	0.199637	-0.297792	0.497429	-	-	-	-	-
Maternal-restricted A compartments	7	90380000	90400000	0.186759	-0.392008	0.578766	-	-	-	-	-
Maternal-restricted A compartments	7	121820000	121840000	2.91763	-2.20908	5.12671	-	-	-	-	-
Maternal-restricted A compartments	8	5020000	5040000	0.155507	-0.187802	0.343309	-	-	-	-	-
Maternal-restricted A compartments	8	5480000	5500000	0.276538	-0.170085	0.446622	-	-	-	-	-
Maternal-restricted A compartments	8	5800000	5820000	0.587824	-0.215606	0.80343	-	-	-	-	-
Maternal-restricted A compartments	8	12460000	12480000	0.407045	-0.229106	0.636151	-	-	-	-	-
Maternal-restricted A compartments	8	41380000	41400000	0.125721	-0.160821	0.286542	-	-	-	-	-
Maternal-restricted A compartments	8	45840000	45860000	0.0953784	-0.230537	0.325915	-	-	-	-	-
Maternal-restricted A compartments	8	88600000	88620000	0.0584174	-0.0922376	0.150655	-	-	-	-	-
Maternal-restricted A compartments	8	113620000	113640000	0.256603	-0.245754	0.502357	-	-	-	-	-
Maternal-restricted A compartments	8	133340000	133360000	0.443752	-0.225324	0.669076	-	-	-	-	-
Maternal-restricted A compartments	8	137480000	137500000	0.237005	-0.311339	0.548344	-	-	-	-	-
Maternal-restricted A compartments	9	21060000	21080000	0.280873	-0.197047	0.47792	-	-	-	-	-
Maternal-restricted A compartments	9	52800000	52820000	1.31429	-0.337046	1.65133	-	-	-	-	-
Maternal-restricted A compartments	9	55680000	55700000	0.308534	-0.137216	0.44575	-	-	-	-	-
Maternal-restricted A compartments	9	90560000	90580000	0.138128	-0.119562	0.25769	-	-	-	-	-
Maternal-restricted A compartments	9	107080000	107100000	0.235364	-0.0484499	0.283813	-	-	-	-	-
Maternal-restricted A compartments	9	118600000	118620000	0.37066	-0.138106	0.508766	-	-	-	-	-
Maternal-restricted A compartments	9	121320000	121340000	0.616494	-0.218768	0.835262	-	-	-	-	-
Maternal-restricted A compartments	10	7760000	7780000	0.423384	-0.242719	0.666103	-	-	-	-	-
Maternal-restricted A compartments	10	7780000	7800000	0.518629	-0.210757	0.729386	-	-	-	-	-
Maternal-restricted A compartments	10	12000000	12020000	0.408599	-0.484932	0.893531	-	-	-	-	-
Maternal-restricted A compartments	10	12040000	12060000	0.216478	-0.881863	1.09834	-	-	-	-	-
Maternal-restricted A compartments	10	12100000	12120000	0.232429	-0.607656	0.840085	-	-	-	-	-
Maternal-restricted A compartments	10	12160000	12180000	0.419579	-0.664766	1.08434	-	-	-	-	-
Maternal-restricted A compartments	10	12200000	12220000	0.276872	-0.5137	0.790572	-	-	-	-	-
Maternal-restricted A compartments	10	12260000	12280000	0.710045	-0.429072	1.13912	-	-	-	-	-
Maternal-restricted A compartments	10	17820000	17840000	0.473913	-0.222358	0.696271	-	-	-	-	-
Maternal-restricted A compartments	10	18200000	18220000	0.371789	-0.329891	0.70168	-	-	-	-	-
Maternal-restricted A compartments	10	18400000	18420000	0.322885	-0.309424	0.632309	-	-	-	-	-
Maternal-restricted A compartments	10	18420000	18440000	0.382906	-0.107275	0.490181	-	-	-	-	-
Maternal-restricted A compartments	10	18440000	18460000	0.504489	-0.186005	0.690494	-	-	-	-	-
Maternal-restricted A compartments	10	18780000	18800000	0.334087	-0.173214	0.507301	-	-	-	-	-
Maternal-restricted A compartments	11	32980000	33000000	0.255765	-0.306551	0.562315	-	-	-	-	-
Maternal-restricted A compartments	11	48440000	48460000	0.169108	-0.428567	0.597675	-	-	-	-	-
Maternal-restricted A compartments	12	16260000	16280000	0.357283	-0.396078	0.753361	-	-	-	-	-
Maternal-restricted A compartments	12	17500000	17520000	0.251012	-0.366735	0.617747	-	-	-	-	-
Maternal-restricted A compartments	12	34760000	34780000	0.617691	-0.251285	0.868977	-	-	-	-	-
Maternal-restricted A compartments	12	34780000	34800000	0.593701	-0.507346	1.10105	-	-	-	-	-
Maternal-restricted A compartments	12	34840000	34860000	0.633037	-0.386863	1.0199	-	-	-	-	-
Maternal-restricted A compartments	13	11120000	11140000	0.491982	-0.341842	0.833823	-	-	-	-	-
Maternal-restricted A compartments	13	11440000	11460000	0.309515	-0.386631	0.696146	-	-	-	-	-
Maternal-restricted A compartments	13	23680000	23700000	0.406049	-0.351242	0.757291	-	-	-	-	-
Maternal-restricted A compartments	13	27120000	27140000	0.566914	-0.21248	0.779394	-	-	-	-	-
Maternal-restricted A compartments	13	40380000	40400000	0.160993	-0.126422	0.287416	-	-	-	-	-
Maternal-restricted A compartments	13	48900000	48920000	0.190527	-0.230244	0.420771	-	-	-	-	-
Maternal-restricted A compartments	13	51080000	51100000	0.294269	-0.358603	0.652872	-	-	-	-	-
Maternal-restricted A compartments	13	54460000	54480000	0.255838	-0.228415	0.484253	-	-	-	-	-
Maternal-restricted A compartments	13	84320000	84340000	0.473264	-0.186152	0.659416	-	-	-	-	-
Maternal-restricted A compartments	13	101040000	101060000	0.217406	-0.163755	0.381161	-	-	-	-	-
Maternal-restricted A compartments	13	111040000	111060000	0.238717	-0.142583	0.3813	-	-	-	-	-
Maternal-restricted A compartments	13	124660000	124680000	0.456352	-0.156367	0.612719	-	-	-	-	-
Maternal-restricted A compartments	13	124720000	124740000	0.430274	-0.119368	0.549642	-	-	-	-	-
Maternal-restricted A compartments	13	127660000	127680000	0.118947	-0.155487	0.274434	-	-	-	-	-
Maternal-restricted A compartments	14	4140000	4160000	0.315914	-0.391629	0.707543	-	-	-	-	-
Maternal-restricted A compartments	14	61740000	61760000	0.391808	-0.491399	0.883207	-	-	-	-	-
Maternal-restricted A compartments	14	61780000	61800000	0.390821	-0.623176	1.014	-	-	-	-	-
Maternal-restricted A compartments	14	61840000	61860000	0.435673	-0.668864	1.10454	-	-	-	-	-
Maternal-restricted A compartments	14	61940000	61960000	0.381397	-0.891011	1.27241	-	-	-	-	-
Maternal-restricted A compartments	14	62840000	62860000	0.0754408	-0.686472	0.761913	-	-	-	-	-
Maternal-restricted A compartments	14	105580000	105600000	0.539259	-0.296893	0.836152	-	-	-	-	-
Maternal-restricted A compartments	14	115080000	115100000	0.247545	-0.471576	0.719121	-	-	-	-	-
Maternal-restricted A compartments	14	125440000	125460000	0.224853	-0.276776	0.501628	-	-	-	-	-
Maternal-restricted A compartments	15	3240000	3260000	0.105515	-0.0490246	0.15454	-	-	-	-	-
Maternal-restricted A compartments	15	13320000	13340000	0.44948	-0.51535	0.96483	-	-	-	-	-
Maternal-restricted A compartments	15	13340000	13360000	0.24127	-0.50088	0.74215	-	-	-	-	-
Maternal-restricted A compartments	15	13360000	13380000	0.201218	-0.572095	0.773313	-	-	-	-	-
Maternal-restricted A compartments	15	13380000	13400000	0.176952	-0.647113	0.824065	-	-	-	-	-
Maternal-restricted A compartments	15	13480000	13500000	0.526786	-1.05731	1.58409	-	-	-	-	-
Maternal-restricted A compartments	15	13500000	13520000	0.298267	-1.06267	1.36094	-	-	-	-	-
Maternal-restricted A compartments	15	18400000	18420000	0.201325	-0.224622	0.425947	-	-	-	-	-
Maternal-restricted A compartments	15	32700000	32720000	0.290835	-0.115416	0.406251	-	-	-	-	-
Maternal-restricted A compartments	15	68780000	68800000	0.117381	-0.140343	0.257724	-	-	-	-	-
Maternal-restricted A compartments	15	95480000	95500000	0.167521	-0.220839	0.38836	-	-	-	-	-
Maternal-restricted A compartments	15	106280000	106300000	0.485459	-0.297361	0.782821	-	-	-	-	-
Maternal-restricted A compartments	15	107900000	107920000	0.114681	-0.342517	0.457197	-	-	-	-	-
Maternal-restricted A compartments	15	115500000	115520000	0.0991131	-0.262151	0.361264	-	-	-	-	-
Maternal-restricted A compartments	15	118480000	118500000	0.0287022	-0.311185	0.339887	-	-	-	-	-
Maternal-restricted A compartments	15	128620000	128640000	0.471589	-0.0841914	0.555781	-	-	-	-	-
Maternal-restricted A compartments	15	128860000	128880000	0.0816662	-0.352464	0.43413	-	-	-	-	-
Maternal-restricted A compartments	15	131260000	131280000	0.289161	-0.181413	0.470574	-	-	-	-	-
Maternal-restricted A compartments	16	24420000	24440000	0.0671857	-0.17627	0.243456	-	-	-	-	-
Maternal-restricted A compartments	16	27000000	27020000	0.253773	-0.209021	0.462793	-	-	-	-	-
Maternal-restricted A compartments	16	36860000	36880000	0.365491	-0.280062	0.645554	-	-	-	-	-
Maternal-restricted A compartments	16	36880000	36900000	0.129373	-0.425546	0.554918	-	-	-	-	-
Maternal-restricted A compartments	16	63600000	63620000	0.297782	-0.15846	0.456242	-	-	-	-	-
Maternal-restricted A compartments	16	72340000	72360000	0.29997	-0.355037	0.655007	-	-	-	-	-
Maternal-restricted A compartments	17	12520000	12540000	0.705544	-0.325046	1.03059	-	-	-	-	-
Maternal-restricted A compartments	18	10740000	10760000	0.225379	-0.143445	0.368824	-	-	-	-	-
Maternal-restricted A compartments	18	20760000	20780000	0.201835	-0.245653	0.447488	-	-	-	-	-
More active compartments in maternal	1	7420000	7440000	6.08217	5.514	0.568166	-	-	-	-	-
More active compartments in maternal	1	268140000	268160000	5.91032	5.22064	0.689677	-	-	-	-	-
More active compartments in maternal	2	61720000	61740000	-3.69256	-4.35907	0.666504	-	-	-	-	-
More active compartments in maternal	2	145720000	145740000	-2.43081	-3.01407	0.583253	-	-	-	-	-
More active compartments in maternal	2	145860000	145880000	-3.42321	-4.05767	0.634466	-	-	-	-	-
More active compartments in maternal	2	145880000	145900000	-3.296	-3.92961	0.63361	-	-	-	-	-
More active compartments in maternal	2	145900000	145920000	-3.60448	-4.30606	0.70158	-	-	-	-	-
More active compartments in maternal	2	145940000	145960000	-4.08133	-4.71526	0.633932	-	-	-	-	-
More active compartments in maternal	2	145980000	146000000	-3.61112	-4.30227	0.691152	-	-	-	-	-
More active compartments in maternal	2	146020000	146040000	-3.67556	-4.44896	0.773399	-	-	-	-	-
More active compartments in maternal	3	8060000	8080000	3.09781	2.53494	0.562871	-	-	-	-	-
More active compartments in maternal	3	8200000	8220000	3.01407	2.50107	0.513001	-	-	-	-	-
More active compartments in maternal	3	67760000	67780000	-5.27714	-5.78511	0.507969	-	-	-	-	-
More active compartments in maternal	3	110540000	110560000	5.13205	4.61018	0.521873	-	-	-	-	-
More active compartments in maternal	4	119000000	119020000	-2.93898	-3.52694	0.587961	-	-	-	-	-
More active compartments in maternal	5	1000000	1020000	4.71694	4.1357	0.581243	-	-	-	-	-
More active compartments in maternal	5	2360000	2380000	3.15908	2.62106	0.538024	-	-	-	-	-
More active compartments in maternal	5	2660000	2680000	4.17743	3.63687	0.540565	-	-	-	-	-
More active compartments in maternal	5	12600000	12620000	1.51555	0.97938	0.53617	-	-	-	-	-
More active compartments in maternal	5	90180000	90200000	3.0028	2.49039	0.512419	-	-	-	-	-
More active compartments in maternal	5	102300000	102320000	-3.35511	-3.97779	0.622675	-	-	-	-	-
More active compartments in maternal	5	102320000	102340000	-3.23011	-3.95599	0.725881	-	-	-	-	-
More active compartments in maternal	5	102340000	102360000	-3.23738	-3.74179	0.504408	-	-	-	-	-
More active compartments in maternal	5	102400000	102420000	-3.5287	-4.0765	0.5478	-	-	-	-	-
More active compartments in maternal	5	102820000	102840000	-3.47797	-4.10914	0.63117	-	-	-	-	-
More active compartments in maternal	5	104400000	104420000	4.95172	4.29603	0.65569	-	-	-	-	-
More active compartments in maternal	6	600000	620000	8.89935	8.27725	0.622102	-	-	-	-	-
More active compartments in maternal	6	2280000	2300000	5.39191	4.8787	0.513209	-	-	-	-	-
More active compartments in maternal	6	100000000	100020000	2.42884	1.9102	0.51864	-	-	-	-	-
More active compartments in maternal	6	147880000	147900000	-1.07623	-1.63541	0.559182	-	-	-	-	-
More active compartments in maternal	6	148120000	148140000	-3.15065	-3.68745	0.536804	-	-	-	-	-
More active compartments in maternal	6	158620000	158640000	3.93275	3.30687	0.625885	-	-	-	-	-
More active compartments in maternal	6	164880000	164900000	4.85272	4.30572	0.546997	-	-	-	-	-
More active compartments in maternal	6	164900000	164920000	3.88716	3.17953	0.707636	-	-	-	-	-
More active compartments in maternal	7	79240000	79260000	-7.44422	-7.97322	0.529002	-	-	-	-	-
More active compartments in maternal	7	89780000	89800000	-2.06446	-2.57259	0.508127	-	-	-	-	-
More active compartments in maternal	7	89980000	90000000	-3.75805	-4.38424	0.626197	-	-	-	-	-
More active compartments in maternal	7	90020000	90040000	-4.0604	-4.68171	0.621312	-	-	-	-	-
More active compartments in maternal	7	90440000	90460000	-0.154869	-0.708412	0.553542	-	-	-	-	-
More active compartments in maternal	7	121320000	121340000	4.85071	4.19932	0.651389	-	-	-	-	-
More active compartments in maternal	7	121360000	121380000	4.33657	3.52487	0.811696	-	-	-	-	-
More active compartments in maternal	7	121400000	121420000	4.56456	3.9389	0.625654	-	-	-	-	-
More active compartments in maternal	7	121420000	121440000	4.53648	3.67034	0.866134	ENSSSCG00000036589	BEGAIN	0.05	2.03	0.024
More active compartments in maternal	7	121460000	121480000	4.46456	3.6388	0.825761	-	-	-	-	-
More active compartments in maternal	7	121480000	121500000	4.46638	3.36357	1.10281	-	-	-	-	-
More active compartments in maternal	7	121540000	121560000	4.8492	3.59436	1.25483	-	-	-	-	-
More active compartments in maternal	7	121560000	121580000	4.56526	3.62594	0.939317	ENSSSCG00000035805	DLK1	0.38	22.78	0.016
More active compartments in maternal	7	121580000	121600000	4.01095	3.09606	0.914889	-	-	-	-	-
More active compartments in maternal	7	121600000	121620000	4.56437	3.25329	1.31108	-	-	-	-	-
More active compartments in maternal	7	121620000	121640000	4.79973	3.56652	1.23321	-	-	-	-	-
More active compartments in maternal	7	121640000	121660000	5.12885	3.86923	1.25961	-	-	-	-	-
More active compartments in maternal	7	121660000	121680000	4.9674	3.75026	1.21714	-	-	-	-	-
More active compartments in maternal	7	121700000	121720000	5.01948	3.17787	1.84161	ENSSSCG00000002573	RTL1	0.1	0	-
More active compartments in maternal	7	121720000	121740000	4.61363	2.2631	2.35053	-	-	-	-	-
More active compartments in maternal	7	121740000	121760000	3.75908	1.49593	2.26315	-	-	-	-	-
More active compartments in maternal	7	121760000	121780000	3.42993	1.00128	2.42865	-	-	-	-	-
More active compartments in maternal	7	121780000	121800000	3.16665	0.584517	2.58214	-	-	-	-	-
More active compartments in maternal	8	2380000	2400000	3.01032	2.48316	0.527165	-	-	-	-	-
More active compartments in maternal	8	2760000	2780000	4.17393	3.65962	0.514316	-	-	-	-	-
More active compartments in maternal	8	5860000	5880000	1.53875	0.982374	0.556371	-	-	-	-	-
More active compartments in maternal	8	5980000	6000000	3.08696	2.51843	0.568535	-	-	-	-	-
More active compartments in maternal	8	6700000	6720000	-1.73449	-2.3337	0.599216	-	-	-	-	-
More active compartments in maternal	8	6840000	6860000	-2.96011	-3.53886	0.578752	-	-	-	-	-
More active compartments in maternal	9	3660000	3680000	-4.51832	-5.08227	0.563958	-	-	-	-	-
More active compartments in maternal	9	4220000	4240000	-3.32972	-3.87523	0.545511	-	-	-	-	-
More active compartments in maternal	9	4260000	4280000	-2.89638	-3.46659	0.57021	-	-	-	-	-
More active compartments in maternal	9	4360000	4380000	-3.74314	-4.47238	0.729245	-	-	-	-	-
More active compartments in maternal	9	127940000	127960000	-4.06206	-4.63219	0.570133	-	-	-	-	-
More active compartments in maternal	10	5600000	5620000	-3.32512	-3.83379	0.508668	-	-	-	-	-
More active compartments in maternal	10	8100000	8120000	-0.966328	-1.74155	0.775219	-	-	-	-	-
More active compartments in maternal	10	13100000	13120000	-2.40713	-2.94575	0.538621	-	-	-	-	-
More active compartments in maternal	10	33740000	33760000	-3.69449	-4.20121	0.50672	-	-	-	-	-
More active compartments in maternal	11	20080000	20100000	-3.62125	-4.24988	0.628629	-	-	-	-	-
More active compartments in maternal	11	20300000	20320000	-4.48283	-5.20858	0.725751	-	-	-	-	-
More active compartments in maternal	11	20400000	20420000	-4.2803	-4.97938	0.699087	-	-	-	-	-
More active compartments in maternal	11	20560000	20580000	-1.68416	-2.38603	0.70187	-	-	-	-	-
More active compartments in maternal	12	21620000	21640000	-1.31003	-1.82367	0.513642	-	-	-	-	-
More active compartments in maternal	12	58780000	58800000	1.55342	0.999152	0.554271	-	-	-	-	-
More active compartments in maternal	12	59060000	59080000	3.57026	3.0107	0.559568	-	-	-	-	-
More active compartments in maternal	13	12940000	12960000	-1.99153	-2.51072	0.519188	-	-	-	-	-
More active compartments in maternal	13	13020000	13040000	-2.17721	-2.69749	0.520279	-	-	-	-	-
More active compartments in maternal	13	80060000	80080000	-2.30308	-2.89284	0.589759	-	-	-	-	-
More active compartments in maternal	13	204080000	204100000	-1.19179	-1.88952	0.697731	-	-	-	-	-
More active compartments in maternal	17	300000	320000	-5.58484	-6.24343	0.658587	-	-	-	-	-
More active compartments in maternal	17	360000	380000	-5.61097	-6.11876	0.507793	-	-	-	-	-
More active compartments in maternal	18	17300000	17320000	1.90983	1.37647	0.533363	-	-	-	-	-
More active compartments in maternal	18	17920000	17940000	3.03869	2.46177	0.576925	-	-	-	-	-
More active compartments in maternal	18	17940000	17960000	3.20257	2.66821	0.534353	-	-	-	-	-
More active compartments in maternal	18	17960000	17980000	3.17059	2.61626	0.554325	-	-	-	-	-
More active compartments in maternal	18	17980000	18000000	3.47867	2.79414	0.684528	-	-	-	-	-
More active compartments in maternal	18	18080000	18100000	2.86143	2.34982	0.511605	-	-	-	-	-
Paternal-restricted A compartments	1	14580000	14600000	-0.154859	0.433568	-0.588426	-	-	-	-	-
Paternal-restricted A compartments	1	50080000	50100000	-0.100823	0.115623	-0.216445	-	-	-	-	-
Paternal-restricted A compartments	1	53520000	53540000	-0.185877	0.11059	-0.296467	-	-	-	-	-
Paternal-restricted A compartments	1	56800000	56820000	-0.0270525	0.324101	-0.351153	-	-	-	-	-
Paternal-restricted A compartments	1	72260000	72280000	-0.241323	0.104231	-0.345555	-	-	-	-	-
Paternal-restricted A compartments	1	73120000	73140000	-0.119156	0.195347	-0.314502	-	-	-	-	-
Paternal-restricted A compartments	1	100300000	100320000	-0.425682	0.0651332	-0.490815	-	-	-	-	-
Paternal-restricted A compartments	1	113800000	113820000	-0.342469	0.313734	-0.656203	-	-	-	-	-
Paternal-restricted A compartments	1	159600000	159620000	-0.356394	0.21553	-0.571925	-	-	-	-	-
Paternal-restricted A compartments	1	181860000	181880000	-0.205256	0.0633466	-0.268603	-	-	-	-	-
Paternal-restricted A compartments	1	187700000	187720000	-0.231105	0.197247	-0.428352	-	-	-	-	-
Paternal-restricted A compartments	1	202120000	202140000	-0.347209	0.109224	-0.456433	-	-	-	-	-
Paternal-restricted A compartments	1	202140000	202160000	-0.326071	0.372921	-0.698992	-	-	-	-	-
Paternal-restricted A compartments	1	222120000	222140000	-0.241649	0.0758841	-0.317533	-	-	-	-	-
Paternal-restricted A compartments	1	222380000	222400000	-0.273272	0.208535	-0.481807	-	-	-	-	-
Paternal-restricted A compartments	2	14560000	14580000	-0.414784	0.207587	-0.62237	-	-	-	-	-
Paternal-restricted A compartments	2	18780000	18800000	-0.146891	0.0613614	-0.208253	-	-	-	-	-
Paternal-restricted A compartments	2	72360000	72380000	-0.120096	0.133793	-0.253889	-	-	-	-	-
Paternal-restricted A compartments	2	84380000	84400000	-0.366463	0.186206	-0.55267	-	-	-	-	-
Paternal-restricted A compartments	2	108360000	108380000	-0.301949	0.398076	-0.700025	-	-	-	-	-
Paternal-restricted A compartments	2	117080000	117100000	-0.217483	0.585335	-0.802818	-	-	-	-	-
Paternal-restricted A compartments	2	133500000	133520000	-0.37874	0.341211	-0.719951	-	-	-	-	-
Paternal-restricted A compartments	3	124160000	124180000	-0.326227	0.181301	-0.507528	-	-	-	-	-
Paternal-restricted A compartments	4	3920000	3940000	-0.0980814	0.369084	-0.467166	-	-	-	-	-
Paternal-restricted A compartments	4	3960000	3980000	-0.410266	0.348866	-0.759132	-	-	-	-	-
Paternal-restricted A compartments	4	38360000	38380000	-0.204228	0.525054	-0.729282	-	-	-	-	-
Paternal-restricted A compartments	4	68880000	68900000	-0.14685	0.17374	-0.32059	-	-	-	-	-
Paternal-restricted A compartments	4	69500000	69520000	-0.201812	0.487036	-0.688848	-	-	-	-	-
Paternal-restricted A compartments	4	69560000	69580000	-0.486415	0.236312	-0.722727	-	-	-	-	-
Paternal-restricted A compartments	4	69620000	69640000	-0.163237	0.279394	-0.442631	-	-	-	-	-
Paternal-restricted A compartments	4	79220000	79240000	-0.07491	0.30531	-0.38022	-	-	-	-	-
Paternal-restricted A compartments	4	102220000	102240000	-0.142245	0.385748	-0.527993	-	-	-	-	-
Paternal-restricted A compartments	4	106220000	106240000	-0.152294	0.437262	-0.589556	-	-	-	-	-
Paternal-restricted A compartments	4	109160000	109180000	-0.309251	0.350582	-0.659833	-	-	-	-	-
Paternal-restricted A compartments	4	111700000	111720000	-0.183625	0.47156	-0.655185	-	-	-	-	-
Paternal-restricted A compartments	4	127240000	127260000	-0.74536	0.702635	-1.448	-	-	-	-	-
Paternal-restricted A compartments	4	127340000	127360000	-0.671975	0.820842	-1.49282	-	-	-	-	-
Paternal-restricted A compartments	4	127360000	127380000	-0.539632	0.962216	-1.50185	-	-	-	-	-
Paternal-restricted A compartments	5	12740000	12760000	-0.190843	0.250371	-0.441214	-	-	-	-	-
Paternal-restricted A compartments	5	76680000	76700000	-0.167418	0.369727	-0.537145	-	-	-	-	-
Paternal-restricted A compartments	5	87160000	87180000	-0.148352	0.0967213	-0.245073	-	-	-	-	-
Paternal-restricted A compartments	5	91500000	91520000	-0.248739	0.309373	-0.558112	-	-	-	-	-
Paternal-restricted A compartments	5	91520000	91540000	-0.403491	0.346126	-0.749617	-	-	-	-	-
Paternal-restricted A compartments	5	92380000	92400000	-0.387005	0.225329	-0.612334	-	-	-	-	-
Paternal-restricted A compartments	5	94360000	94380000	-0.866331	0.378308	-1.24464	-	-	-	-	-
Paternal-restricted A compartments	6	6380000	6400000	-0.428696	0.348807	-0.777502	-	-	-	-	-
Paternal-restricted A compartments	6	18120000	18140000	-0.214554	0.267852	-0.482405	-	-	-	-	-
Paternal-restricted A compartments	6	29440000	29460000	-0.25075	0.0415087	-0.292259	-	-	-	-	-
Paternal-restricted A compartments	6	37780000	37800000	-0.177107	0.330861	-0.507968	-	-	-	-	-
Paternal-restricted A compartments	6	37940000	37960000	-0.135433	0.319018	-0.454452	-	-	-	-	-
Paternal-restricted A compartments	6	58760000	58780000	-0.313801	0.712241	-1.02604	-	-	-	-	-
Paternal-restricted A compartments	6	58780000	58800000	-0.743755	0.576788	-1.32054	-	-	-	-	-
Paternal-restricted A compartments	6	61260000	61280000	-1.67764	0.619959	-2.2976	-	-	-	-	-
Paternal-restricted A compartments	6	61280000	61300000	-1.29578	1.14889	-2.44467	ENSSSCG00000003326	PEG3	0	14.81	0
Paternal-restricted A compartments	6	61300000	61320000	-0.750026	1.88073	-2.63076	-	-	-	-	-
Paternal-restricted A compartments	6	61320000	61340000	-1.15256	1.23375	-2.38631	-	-	-	-	-
Paternal-restricted A compartments	6	61340000	61360000	-1.07796	0.982815	-2.06078	-	-	-	-	-
Paternal-restricted A compartments	6	61360000	61380000	-1.09207	0.836832	-1.9289	-	-	-	-	-
Paternal-restricted A compartments	6	61380000	61400000	-0.768279	1.03353	-1.80181	-	-	-	-	-
Paternal-restricted A compartments	6	61400000	61420000	-0.852441	0.849662	-1.7021	-	-	-	-	-
Paternal-restricted A compartments	6	61420000	61440000	-0.48621	0.516806	-1.00302	-	-	-	-	-
Paternal-restricted A compartments	6	61440000	61460000	-0.500706	0.770261	-1.27097	-	-	-	-	-
Paternal-restricted A compartments	6	61460000	61480000	-0.475343	0.857386	-1.33273	-	-	-	-	-
Paternal-restricted A compartments	6	93020000	93040000	-0.475901	0.335056	-0.810957	-	-	-	-	-
Paternal-restricted A compartments	6	105920000	105940000	-0.173331	0.178991	-0.352322	-	-	-	-	-
Paternal-restricted A compartments	6	156200000	156220000	-0.174503	0.277124	-0.451627	-	-	-	-	-
Paternal-restricted A compartments	6	156840000	156860000	-0.277895	0.26872	-0.546615	-	-	-	-	-
Paternal-restricted A compartments	7	19480000	19500000	-0.625105	0.33111	-0.956215	-	-	-	-	-
Paternal-restricted A compartments	7	22560000	22580000	-0.697552	0.146994	-0.844546	-	-	-	-	-
Paternal-restricted A compartments	7	34520000	34540000	-0.397307	0.242281	-0.639588	-	-	-	-	-
Paternal-restricted A compartments	7	34560000	34580000	-0.197461	0.246151	-0.443612	-	-	-	-	-
Paternal-restricted A compartments	7	35640000	35660000	-0.32265	0.479995	-0.802645	-	-	-	-	-
Paternal-restricted A compartments	7	35680000	35700000	-0.427318	0.493207	-0.920525	-	-	-	-	-
Paternal-restricted A compartments	7	35700000	35720000	-0.244201	0.560996	-0.805197	-	-	-	-	-
Paternal-restricted A compartments	7	54040000	54060000	-0.59952	0.478273	-1.07779	-	-	-	-	-
Paternal-restricted A compartments	7	54060000	54080000	-0.401351	0.299321	-0.700672	-	-	-	-	-
Paternal-restricted A compartments	7	54100000	54120000	-0.375134	0.59322	-0.968354	-	-	-	-	-
Paternal-restricted A compartments	7	54140000	54160000	-0.458915	0.540493	-0.999408	-	-	-	-	-
Paternal-restricted A compartments	7	54160000	54180000	-0.347487	0.633857	-0.981344	-	-	-	-	-
Paternal-restricted A compartments	7	67140000	67160000	-0.171204	0.184814	-0.356018	-	-	-	-	-
Paternal-restricted A compartments	7	67260000	67280000	-0.175736	0.303039	-0.478775	-	-	-	-	-
Paternal-restricted A compartments	7	76280000	76300000	-0.274407	0.270023	-0.544431	-	-	-	-	-
Paternal-restricted A compartments	7	94440000	94460000	-0.117491	0.322845	-0.440335	-	-	-	-	-
Paternal-restricted A compartments	7	94460000	94480000	-0.192526	0.151323	-0.343849	-	-	-	-	-
Paternal-restricted A compartments	8	4700000	4720000	-0.235285	0.256515	-0.4918	-	-	-	-	-
Paternal-restricted A compartments	8	11580000	11600000	-0.129888	0.222671	-0.352559	-	-	-	-	-
Paternal-restricted A compartments	8	20640000	20660000	-0.0690278	0.240004	-0.309031	-	-	-	-	-
Paternal-restricted A compartments	8	31640000	31660000	-0.0703732	0.517145	-0.587518	-	-	-	-	-
Paternal-restricted A compartments	8	31860000	31880000	-0.248207	0.514329	-0.762537	-	-	-	-	-
Paternal-restricted A compartments	8	60020000	60040000	-0.22171	0.205568	-0.427278	-	-	-	-	-
Paternal-restricted A compartments	8	89200000	89220000	-0.334605	0.0792269	-0.413832	-	-	-	-	-
Paternal-restricted A compartments	8	102860000	102880000	-0.183757	0.395522	-0.579279	-	-	-	-	-
Paternal-restricted A compartments	8	102880000	102900000	-0.220782	0.291741	-0.512524	-	-	-	-	-
Paternal-restricted A compartments	9	28020000	28040000	-0.112329	0.18178	-0.29411	-	-	-	-	-
Paternal-restricted A compartments	9	33180000	33200000	-0.292136	0.185201	-0.477336	-	-	-	-	-
Paternal-restricted A compartments	9	72820000	72840000	-0.249888	0.168746	-0.418633	-	-	-	-	-
Paternal-restricted A compartments	9	74480000	74500000	-0.476276	0.737561	-1.21384	-	-	-	-	-
Paternal-restricted A compartments	9	74500000	74520000	-0.752408	0.232166	-0.984574	-	-	-	-	-
Paternal-restricted A compartments	9	89320000	89340000	-0.4289	0.0813423	-0.510242	-	-	-	-	-
Paternal-restricted A compartments	9	90960000	90980000	-0.0949675	0.114182	-0.20915	-	-	-	-	-
Paternal-restricted A compartments	9	91520000	91540000	-0.118261	0.26288	-0.381141	-	-	-	-	-
Paternal-restricted A compartments	9	100240000	100260000	-0.293429	0.0538244	-0.347253	-	-	-	-	-
Paternal-restricted A compartments	9	106860000	106880000	-0.247648	0.320191	-0.567839	-	-	-	-	-
Paternal-restricted A compartments	9	122840000	122860000	-0.182566	0.778451	-0.961017	-	-	-	-	-
Paternal-restricted A compartments	9	122880000	122900000	-0.217876	0.824215	-1.04209	-	-	-	-	-
Paternal-restricted A compartments	9	139040000	139060000	-0.391909	0.408868	-0.800777	-	-	-	-	-
Paternal-restricted A compartments	10	580000	600000	-0.466105	0.295886	-0.761991	-	-	-	-	-
Paternal-restricted A compartments	10	17020000	17040000	-0.0946824	0.335542	-0.430224	-	-	-	-	-
Paternal-restricted A compartments	10	39020000	39040000	-0.0625996	0.163334	-0.225934	-	-	-	-	-
Paternal-restricted A compartments	10	43360000	43380000	-0.235318	0.321965	-0.557283	-	-	-	-	-
Paternal-restricted A compartments	10	48580000	48600000	-0.172673	0.342516	-0.515189	-	-	-	-	-
Paternal-restricted A compartments	10	50320000	50340000	-0.537436	0.0652244	-0.60266	-	-	-	-	-
Paternal-restricted A compartments	10	50340000	50360000	-0.636059	0.133796	-0.769855	-	-	-	-	-
Paternal-restricted A compartments	10	50520000	50540000	-0.0958126	0.681354	-0.777167	-	-	-	-	-
Paternal-restricted A compartments	11	6140000	6160000	-0.275617	0.0841772	-0.359794	-	-	-	-	-
Paternal-restricted A compartments	11	11060000	11080000	-0.16584	0.356675	-0.522514	-	-	-	-	-
Paternal-restricted A compartments	11	63480000	63500000	-0.488967	0.195581	-0.684548	-	-	-	-	-
Paternal-restricted A compartments	11	75640000	75660000	-0.176642	0.436004	-0.612646	-	-	-	-	-
Paternal-restricted A compartments	12	7580000	7600000	-0.316675	0.206807	-0.523482	-	-	-	-	-
Paternal-restricted A compartments	12	7600000	7620000	-0.0954025	0.469822	-0.565224	-	-	-	-	-
Paternal-restricted A compartments	12	7660000	7680000	-0.217164	0.311706	-0.52887	-	-	-	-	-
Paternal-restricted A compartments	12	11600000	11620000	-0.119119	0.186032	-0.305152	-	-	-	-	-
Paternal-restricted A compartments	12	48760000	48780000	-0.63263	0.593701	-1.22633	-	-	-	-	-
Paternal-restricted A compartments	12	54680000	54700000	-0.310373	0.293425	-0.603798	-	-	-	-	-
Paternal-restricted A compartments	12	55360000	55380000	-0.516784	0.257763	-0.774547	-	-	-	-	-
Paternal-restricted A compartments	13	8220000	8240000	-0.457647	0.229034	-0.686681	-	-	-	-	-
Paternal-restricted A compartments	13	8460000	8480000	-0.13505	0.209103	-0.344153	-	-	-	-	-
Paternal-restricted A compartments	13	47060000	47080000	-0.197627	0.333925	-0.531551	-	-	-	-	-
Paternal-restricted A compartments	13	85320000	85340000	-0.14947	0.163426	-0.312896	-	-	-	-	-
Paternal-restricted A compartments	13	170560000	170580000	-0.190726	0.643649	-0.834376	-	-	-	-	-
Paternal-restricted A compartments	13	170640000	170660000	-0.0785129	0.503827	-0.58234	-	-	-	-	-
Paternal-restricted A compartments	13	189420000	189440000	-0.185274	0.190627	-0.375901	-	-	-	-	-
Paternal-restricted A compartments	13	190940000	190960000	-0.552602	0.325978	-0.87858	-	-	-	-	-
Paternal-restricted A compartments	14	2360000	2380000	-0.194744	0.126718	-0.321463	-	-	-	-	-
Paternal-restricted A compartments	14	11960000	11980000	-0.464061	0.345093	-0.809154	-	-	-	-	-
Paternal-restricted A compartments	14	12240000	12260000	-0.446971	0.411337	-0.858308	-	-	-	-	-
Paternal-restricted A compartments	14	21120000	21140000	-0.271712	0.252012	-0.523725	-	-	-	-	-
Paternal-restricted A compartments	14	33340000	33360000	-0.243233	0.149722	-0.392955	-	-	-	-	-
Paternal-restricted A compartments	14	33420000	33440000	-0.32651	0.175422	-0.501932	-	-	-	-	-
Paternal-restricted A compartments	14	36440000	36460000	-0.401694	0.310031	-0.711726	-	-	-	-	-
Paternal-restricted A compartments	14	57900000	57920000	-0.451138	0.310567	-0.761705	-	-	-	-	-
Paternal-restricted A compartments	14	58320000	58340000	-0.160558	0.591054	-0.751612	-	-	-	-	-
Paternal-restricted A compartments	14	58600000	58620000	-0.285101	0.581903	-0.867004	-	-	-	-	-
Paternal-restricted A compartments	14	58720000	58740000	-0.381139	0.630243	-1.01138	-	-	-	-	-
Paternal-restricted A compartments	14	85560000	85580000	-0.602785	0.39318	-0.995965	-	-	-	-	-
Paternal-restricted A compartments	14	89940000	89960000	-0.387186	0.15856	-0.545746	-	-	-	-	-
Paternal-restricted A compartments	14	91120000	91140000	-0.212106	0.369571	-0.581677	-	-	-	-	-
Paternal-restricted A compartments	14	100120000	100140000	-0.235526	0.114831	-0.350357	-	-	-	-	-
Paternal-restricted A compartments	14	104900000	104920000	-0.315923	0.267113	-0.583036	-	-	-	-	-
Paternal-restricted A compartments	14	111140000	111160000	-0.344939	0.326328	-0.671267	-	-	-	-	-
Paternal-restricted A compartments	14	111780000	111800000	-0.102018	0.659437	-0.761454	-	-	-	-	-
Paternal-restricted A compartments	14	122940000	122960000	-0.214984	0.227719	-0.442704	-	-	-	-	-
Paternal-restricted A compartments	14	122980000	123000000	-0.0765196	0.232276	-0.308795	-	-	-	-	-
Paternal-restricted A compartments	15	1580000	1600000	-0.213346	0.498055	-0.7114	-	-	-	-	-
Paternal-restricted A compartments	15	2160000	2180000	-0.254134	0.792559	-1.04669	-	-	-	-	-
Paternal-restricted A compartments	15	3680000	3700000	-0.0911842	0.297264	-0.388449	-	-	-	-	-
Paternal-restricted A compartments	15	17060000	17080000	-0.174554	0.161917	-0.336471	-	-	-	-	-
Paternal-restricted A compartments	15	17240000	17260000	-0.413445	0.245059	-0.658505	-	-	-	-	-
Paternal-restricted A compartments	15	17400000	17420000	-0.318124	0.518617	-0.836741	-	-	-	-	-
Paternal-restricted A compartments	15	32680000	32700000	-0.126526	0.407464	-0.53399	-	-	-	-	-
Paternal-restricted A compartments	15	54200000	54220000	-0.177943	0.0725062	-0.25045	-	-	-	-	-
Paternal-restricted A compartments	15	92260000	92280000	-0.323609	0.0909643	-0.414574	-	-	-	-	-
Paternal-restricted A compartments	15	109580000	109600000	-0.0903845	0.497577	-0.587962	-	-	-	-	-
Paternal-restricted A compartments	15	109600000	109620000	-0.327417	0.546968	-0.874386	-	-	-	-	-
Paternal-restricted A compartments	15	109660000	109680000	-0.539922	0.437847	-0.977768	-	-	-	-	-
Paternal-restricted A compartments	15	115520000	115540000	-0.117354	0.192275	-0.309629	-	-	-	-	-
Paternal-restricted A compartments	15	122020000	122040000	-0.251163	0.208132	-0.459295	-	-	-	-	-
Paternal-restricted A compartments	15	122060000	122080000	-0.225242	0.23014	-0.455382	-	-	-	-	-
Paternal-restricted A compartments	15	127260000	127280000	-0.258628	0.186453	-0.445081	-	-	-	-	-
Paternal-restricted A compartments	15	134300000	134320000	-0.250145	0.389134	-0.639279	-	-	-	-	-
Paternal-restricted A compartments	15	134840000	134860000	-0.436976	0.301146	-0.738121	-	-	-	-	-
Paternal-restricted A compartments	15	134880000	134900000	-0.455033	0.47911	-0.934142	-	-	-	-	-
Paternal-restricted A compartments	16	5060000	5080000	-0.160691	0.134074	-0.294765	-	-	-	-	-
Paternal-restricted A compartments	16	26520000	26540000	-0.226314	0.14359	-0.369904	-	-	-	-	-
Paternal-restricted A compartments	16	49760000	49780000	-0.326448	0.110239	-0.436687	-	-	-	-	-
Paternal-restricted A compartments	16	74200000	74220000	-0.143139	0.146607	-0.289747	-	-	-	-	-
Paternal-restricted A compartments	16	75040000	75060000	-0.246481	0.359939	-0.60642	-	-	-	-	-
Paternal-restricted A compartments	17	12640000	12660000	-0.19156	0.391308	-0.582867	-	-	-	-	-
Paternal-restricted A compartments	17	12660000	12680000	-0.149157	0.213626	-0.362784	-	-	-	-	-
Paternal-restricted A compartments	17	12680000	12700000	-0.330763	0.278645	-0.609408	-	-	-	-	-
Paternal-restricted A compartments	17	12700000	12720000	-0.199071	0.221707	-0.420777	-	-	-	-	-
Paternal-restricted A compartments	17	12720000	12740000	-0.363867	0.260255	-0.624122	-	-	-	-	-
Paternal-restricted A compartments	17	28520000	28540000	-0.289927	0.526518	-0.816445	-	-	-	-	-
Paternal-restricted A compartments	18	1020000	1040000	-0.307251	0.0728857	-0.380136	-	-	-	-	-
Paternal-restricted A compartments	18	29540000	29560000	-0.387328	0.140164	-0.527492	-	-	-	-	-
Paternal-restricted A compartments	18	29680000	29700000	-0.520823	0.182083	-0.702906	-	-	-	-	-
More active compartments in paternal	1	20840000	20860000	1.58803	2.09404	-0.506011	-	-	-	-	-
More active compartments in paternal	1	21180000	21200000	1.30334	1.90888	-0.605541	-	-	-	-	-
More active compartments in paternal	1	21220000	21240000	1.94582	2.75051	-0.80468	-	-	-	-	-
More active compartments in paternal	1	21240000	21260000	2.00226	3.16419	-1.16193	-	-	-	-	-
More active compartments in paternal	1	21260000	21280000	1.70717	2.61002	-0.90285	-	-	-	-	-
More active compartments in paternal	1	21280000	21300000	1.42998	2.42689	-0.99691	-	-	-	-	-
More active compartments in paternal	1	21300000	21320000	1.4898	2.48319	-0.99339	ENSSSCG00000004127	PLAGL1	0.13	15.28	0.008
More active compartments in paternal	1	21320000	21340000	1.57597	2.60595	-1.02998	-	-	-	-	-
More active compartments in paternal	1	21340000	21360000	1.78386	3.09589	-1.31204	-	-	-	-	-
More active compartments in paternal	1	21360000	21380000	1.74852	2.56724	-0.818723	-	-	-	-	-
More active compartments in paternal	1	21380000	21400000	2.1089	3.06263	-0.953728	-	-	-	-	-
More active compartments in paternal	1	21400000	21420000	2.23839	2.76396	-0.525566	-	-	-	-	-
More active compartments in paternal	1	21420000	21440000	2.28731	3.10524	-0.817932	-	-	-	-	-
More active compartments in paternal	1	21440000	21460000	2.00471	2.52144	-0.516732	-	-	-	-	-
More active compartments in paternal	1	21500000	21520000	2.22127	2.94373	-0.722464	-	-	-	-	-
More active compartments in paternal	1	21520000	21540000	2.2994	2.87505	-0.575648	-	-	-	-	-
More active compartments in paternal	1	21580000	21600000	1.85012	2.47268	-0.622557	-	-	-	-	-
More active compartments in paternal	1	21640000	21660000	1.4969	2.03858	-0.541679	-	-	-	-	-
More active compartments in paternal	1	130040000	130060000	7.04379	7.67532	-0.631531	-	-	-	-	-
More active compartments in paternal	1	142220000	142240000	-5.45944	-3.48345	-1.97599	-	-	-	-	-
More active compartments in paternal	1	142240000	142260000	-4.77337	-2.34256	-2.43081	-	-	-	-	-
More active compartments in paternal	1	142260000	142280000	-4.94193	-2.02333	-2.91859	-	-	-	-	-
More active compartments in paternal	1	142280000	142300000	-5.25037	-2.04143	-3.20894	-	-	-	-	-
More active compartments in paternal	1	142300000	142320000	-5.67178	-2.64066	-3.03113	-	-	-	-	-
More active compartments in paternal	1	142320000	142340000	-5.58418	-2.88694	-2.69724	-	-	-	-	-
More active compartments in paternal	1	142340000	142360000	-5.58181	-2.904	-2.67781	-	-	-	-	-
More active compartments in paternal	1	142360000	142380000	-5.4903	-2.51613	-2.97417	-	-	-	-	-
More active compartments in paternal	1	142380000	142400000	-5.58055	-2.50282	-3.07773	-	-	-	-	-
More active compartments in paternal	1	142400000	142420000	-5.34949	-1.86267	-3.48681	ENSSSCG00000004834	NDN	0.18	78.09	0.002
More active compartments in paternal	1	142420000	142440000	-5.35098	-1.92239	-3.42859	-	-	-	-	-
More active compartments in paternal	1	142440000	142460000	-5.12196	-2.00941	-3.11255	ENSSSCG00000004835	MAGEL2	0	4.73	0
More active compartments in paternal	1	142460000	142480000	-5.07765	-2.33361	-2.74403	-	-	-	-	-
More active compartments in paternal	1	142480000	142500000	-5.10606	-2.58562	-2.52044	-	-	-	-	-
More active compartments in paternal	1	142500000	142520000	-5.04155	-2.69547	-2.34607	ENSSSCG00000004836	MKRN3	0.1	2.42	0.04
More active compartments in paternal	1	142520000	142540000	-4.8898	-2.91091	-1.9789	-	-	-	-	-
More active compartments in paternal	1	142540000	142560000	-4.7079	-2.9681	-1.7398	-	-	-	-	-
More active compartments in paternal	1	142560000	142580000	-4.36021	-2.94124	-1.41897	-	-	-	-	-
More active compartments in paternal	1	142580000	142600000	-4.81599	-3.78943	-1.02656	-	-	-	-	-
More active compartments in paternal	1	142600000	142620000	-5.40916	-4.43396	-0.975195	-	-	-	-	-
More active compartments in paternal	1	142620000	142640000	-5.46079	-4.77323	-0.687566	-	-	-	-	-
More active compartments in paternal	1	142660000	142680000	-5.43881	-4.58472	-0.854092	-	-	-	-	-
More active compartments in paternal	1	142700000	142720000	-5.28193	-4.2175	-1.06443	-	-	-	-	-
More active compartments in paternal	1	142880000	142900000	-4.99493	-3.66464	-1.33029	-	-	-	-	-
More active compartments in paternal	1	142960000	142980000	-5.04278	-4.03003	-1.01276	-	-	-	-	-
More active compartments in paternal	1	222540000	222560000	1.3694	1.92592	-0.556519	-	-	-	-	-
More active compartments in paternal	1	235760000	235780000	1.82213	2.33368	-0.511551	-	-	-	-	-
More active compartments in paternal	1	243520000	243540000	-5.20186	-4.63832	-0.563538	-	-	-	-	-
More active compartments in paternal	1	258960000	258980000	-5.9764	-5.45883	-0.517568	-	-	-	-	-
More active compartments in paternal	1	259360000	259380000	-5.56094	-4.99649	-0.564452	-	-	-	-	-
More active compartments in paternal	1	263460000	263480000	-8.3438	-7.7281	-0.6157	-	-	-	-	-
More active compartments in paternal	2	1380000	1400000	3.45379	4.42961	-0.975822	ENSSSCG00000050649	H19	3.01	3917.41	0
More active compartments in paternal	2	24180000	24200000	-3.86135	-3.26851	-0.592838	-	-	-	-	-
More active compartments in paternal	2	35900000	35920000	-3.61623	-3.01424	-0.601991	-	-	-	-	-
More active compartments in paternal	2	44320000	44340000	-3.00905	-2.43662	-0.572428	-	-	-	-	-
More active compartments in paternal	2	44340000	44360000	-2.69461	-2.16573	-0.528881	-	-	-	-	-
More active compartments in paternal	2	44360000	44380000	-1.774	-1.2208	-0.553206	-	-	-	-	-
More active compartments in paternal	2	46240000	46260000	0.846006	1.37737	-0.531364	-	-	-	-	-
More active compartments in paternal	2	66440000	66460000	-1.19777	-0.581369	-0.616396	-	-	-	-	-
More active compartments in paternal	2	70340000	70360000	-3.87177	-2.9797	-0.892069	-	-	-	-	-
More active compartments in paternal	2	70380000	70400000	-4.35241	-3.45842	-0.893989	-	-	-	-	-
More active compartments in paternal	2	145100000	145120000	2.76788	3.42811	-0.660233	-	-	-	-	-
More active compartments in paternal	3	5160000	5180000	4.43811	4.94472	-0.506612	-	-	-	-	-
More active compartments in paternal	3	126200000	126220000	5.73105	6.30416	-0.573111	-	-	-	-	-
More active compartments in paternal	4	60760000	60780000	-3.77877	-3.26032	-0.518448	-	-	-	-	-
More active compartments in paternal	4	60800000	60820000	-3.82973	-3.29061	-0.539122	-	-	-	-	-
More active compartments in paternal	4	112340000	112360000	-3.21474	-2.69257	-0.522167	-	-	-	-	-
More active compartments in paternal	4	112360000	112380000	-3.42441	-2.89039	-0.534017	-	-	-	-	-
More active compartments in paternal	4	112400000	112420000	-3.70205	-3.17196	-0.530089	-	-	-	-	-
More active compartments in paternal	4	112440000	112460000	-3.50764	-2.86692	-0.640725	-	-	-	-	-
More active compartments in paternal	4	112460000	112480000	-3.98396	-3.29832	-0.685635	-	-	-	-	-
More active compartments in paternal	4	112500000	112520000	-4.34435	-3.67189	-0.672458	-	-	-	-	-
More active compartments in paternal	4	112580000	112600000	-4.6718	-4.00507	-0.666724	-	-	-	-	-
More active compartments in paternal	4	120140000	120160000	-3.40652	-2.8533	-0.55322	-	-	-	-	-
More active compartments in paternal	4	120160000	120180000	-3.41435	-2.89149	-0.522859	-	-	-	-	-
More active compartments in paternal	4	120300000	120320000	-3.39385	-2.8769	-0.516951	-	-	-	-	-
More active compartments in paternal	4	120360000	120380000	-3.44504	-2.87098	-0.574061	-	-	-	-	-
More active compartments in paternal	4	120380000	120400000	-3.36035	-2.68142	-0.678933	-	-	-	-	-
More active compartments in paternal	4	120540000	120560000	-3.34284	-2.82695	-0.51589	-	-	-	-	-
More active compartments in paternal	4	121980000	122000000	-4.25376	-3.45107	-0.802693	-	-	-	-	-
More active compartments in paternal	4	122020000	122040000	-4.16977	-3.51298	-0.656798	-	-	-	-	-
More active compartments in paternal	4	122060000	122080000	-3.99253	-3.30349	-0.689044	-	-	-	-	-
More active compartments in paternal	4	122100000	122120000	-3.37662	-2.87516	-0.50146	-	-	-	-	-
More active compartments in paternal	4	125760000	125780000	1.30813	1.84562	-0.537489	-	-	-	-	-
More active compartments in paternal	4	125940000	125960000	-1.8129	-1.2854	-0.527496	-	-	-	-	-
More active compartments in paternal	4	126920000	126940000	1.42002	1.93382	-0.513801	-	-	-	-	-
More active compartments in paternal	4	127400000	127420000	0.793089	1.68514	-0.892048	-	-	-	-	-
More active compartments in paternal	5	12180000	12200000	1.3596	1.93003	-0.570428	-	-	-	-	-
More active compartments in paternal	5	40120000	40140000	-4.65023	-4.10107	-0.549156	-	-	-	-	-
More active compartments in paternal	5	40140000	40160000	-4.6665	-4.03629	-0.630209	-	-	-	-	-
More active compartments in paternal	5	103360000	103380000	2.14783	2.69072	-0.542891	-	-	-	-	-
More active compartments in paternal	6	21960000	21980000	-5.68774	-5.18497	-0.502768	-	-	-	-	-
More active compartments in paternal	6	22480000	22500000	-5.60287	-5.03778	-0.565087	-	-	-	-	-
More active compartments in paternal	6	27240000	27260000	2.09378	2.69246	-0.598678	-	-	-	-	-
More active compartments in paternal	6	56800000	56820000	-2.83226	-2.33016	-0.502099	-	-	-	-	-
More active compartments in paternal	6	61080000	61100000	-3.84667	-3.08231	-0.764352	-	-	-	-	-
More active compartments in paternal	6	61100000	61120000	-3.86686	-3.053	-0.813852	-	-	-	-	-
More active compartments in paternal	6	61120000	61140000	-3.78147	-2.82315	-0.958315	-	-	-	-	-
More active compartments in paternal	6	61140000	61160000	-3.34285	-2.16019	-1.18266	-	-	-	-	-
More active compartments in paternal	6	61160000	61180000	-3.06761	-1.88769	-1.17991	-	-	-	-	-
More active compartments in paternal	6	61180000	61200000	-2.39318	-0.856625	-1.53655	-	-	-	-	-
More active compartments in paternal	6	61200000	61220000	-1.98979	-0.616005	-1.37378	-	-	-	-	-
More active compartments in paternal	6	165920000	165940000	3.52657	4.06333	-0.536763	-	-	-	-	-
More active compartments in paternal	7	74580000	74600000	-4.52022	-3.94118	-0.579045	-	-	-	-	-
More active compartments in paternal	7	74600000	74620000	-4.3377	-3.66283	-0.674866	-	-	-	-	-
More active compartments in paternal	7	74760000	74780000	-3.15586	-2.61963	-0.536234	-	-	-	-	-
More active compartments in paternal	7	79380000	79400000	-7.30874	-6.79613	-0.512609	-	-	-	-	-
More active compartments in paternal	7	80540000	80560000	-3.83067	-3.16593	-0.664743	-	-	-	-	-
More active compartments in paternal	7	80560000	80580000	-3.86125	-3.12154	-0.739717	-	-	-	-	-
More active compartments in paternal	7	117240000	117260000	-2.19459	-1.6644	-0.530185	-	-	-	-	-
More active compartments in paternal	7	118920000	118940000	-5.21281	-4.67786	-0.534945	-	-	-	-	-
More active compartments in paternal	7	119440000	119460000	-3.41543	-2.83625	-0.57918	-	-	-	-	-
More active compartments in paternal	7	119480000	119500000	-3.27594	-2.66125	-0.614688	-	-	-	-	-
More active compartments in paternal	7	119640000	119660000	-4.22196	-3.6682	-0.553759	-	-	-	-	-
More active compartments in paternal	8	57360000	57380000	-2.99296	-2.46875	-0.524207	-	-	-	-	-
More active compartments in paternal	8	66020000	66040000	-1.10899	-0.566145	-0.542849	-	-	-	-	-
More active compartments in paternal	8	133820000	133840000	3.16337	3.69498	-0.53161	-	-	-	-	-
More active compartments in paternal	9	4720000	4740000	-5.77235	-5.21042	-0.561926	-	-	-	-	-
More active compartments in paternal	9	74320000	74340000	0.569695	1.1857	-0.616006	-	-	-	-	-
More active compartments in paternal	9	74420000	74440000	0.475585	1.62609	-1.1505	-	-	-	-	-
More active compartments in paternal	9	74440000	74460000	0.343872	1.44978	-1.1059	-	-	-	-	-
More active compartments in paternal	9	74460000	74480000	0.341102	1.64977	-1.30866	ENSSSCG00000015328;ENSSSCG00000036049	SGCE;PEG10	-;0.39	-;48.83	-;0.008
More active compartments in paternal	9	135360000	135380000	-1.21952	-0.707362	-0.512158	-	-	-	-	-
More active compartments in paternal	9	135440000	135460000	-1.86422	-1.27879	-0.58543	-	-	-	-	-
More active compartments in paternal	10	1300000	1320000	-2.15645	-1.58019	-0.576256	-	-	-	-	-
More active compartments in paternal	10	2140000	2160000	-4.26113	-3.60339	-0.657741	-	-	-	-	-
More active compartments in paternal	10	56800000	56820000	1.70035	2.20528	-0.504935	-	-	-	-	-
More active compartments in paternal	10	59760000	59780000	2.64852	3.35122	-0.702705	-	-	-	-	-
More active compartments in paternal	10	69200000	69220000	2.78121	3.43981	-0.658595	-	-	-	-	-
More active compartments in paternal	11	19500000	19520000	2.86172	3.37217	-0.510452	-	-	-	-	-
More active compartments in paternal	12	6660000	6680000	1.35281	2.03028	-0.677463	-	-	-	-	-
More active compartments in paternal	12	6840000	6860000	1.31604	1.92765	-0.611617	-	-	-	-	-
More active compartments in paternal	12	7000000	7020000	-1.39177	-0.858388	-0.53338	-	-	-	-	-
More active compartments in paternal	12	7080000	7100000	-1.887	-1.36227	-0.52473	-	-	-	-	-
More active compartments in paternal	13	0	20000	-4.66806	-3.26112	-1.40694	-	-	-	-	-
More active compartments in paternal	13	120000	140000	-4.13097	-2.80213	-1.32884	-	-	-	-	-
More active compartments in paternal	13	64680000	64700000	-3.31012	-2.77475	-0.53537	-	-	-	-	-
More active compartments in paternal	13	91660000	91680000	-3.90777	-3.38726	-0.520514	-	-	-	-	-
More active compartments in paternal	13	131520000	131540000	3.38618	3.91852	-0.532343	-	-	-	-	-
More active compartments in paternal	13	131580000	131600000	4.10464	4.60794	-0.503306	-	-	-	-	-
More active compartments in paternal	13	131820000	131840000	3.23556	3.85112	-0.615566	-	-	-	-	-
More active compartments in paternal	13	131980000	132000000	2.05645	2.62871	-0.572255	-	-	-	-	-
More active compartments in paternal	13	132060000	132080000	2.56919	3.12638	-0.557185	-	-	-	-	-
More active compartments in paternal	13	132080000	132100000	3.38211	3.90639	-0.524285	-	-	-	-	-
More active compartments in paternal	13	132120000	132140000	3.86767	4.40679	-0.539117	-	-	-	-	-
More active compartments in paternal	14	132680000	132700000	1.95688	2.48234	-0.525455	-	-	-	-	-
More active compartments in paternal	14	141040000	141060000	2.90423	3.49108	-0.586853	-	-	-	-	-
More active compartments in paternal	15	33780000	33800000	-2.276	-1.71806	-0.557935	-	-	-	-	-
More active compartments in paternal	16	960000	980000	-2.31979	-1.8031	-0.516693	-	-	-	-	-
More active compartments in paternal	16	1140000	1160000	-2.36099	-1.50413	-0.856869	-	-	-	-	-
More active compartments in paternal	17	12400000	12420000	-1.82612	-0.921961	-0.904158	-	-	-	-	-
More active compartments in paternal	17	12780000	12800000	0.37107	0.906513	-0.535444	-	-	-	-	-
More active compartments in paternal	17	23320000	23340000	-4.99279	-4.40184	-0.590951	-	-	-	-	-
More active compartments in paternal	17	61700000	61720000	4.3895	4.90193	-0.512426	-	-	-	-	-

## Sheet: Sheet 4 (Brain)
Differential compartments between parent-of-origin	Chromosome	Start	End	Mean A-B index of maternal	Mean A-B index of paternal	ΔA-B index (maternal vs. paternal)	Ensembl ID of known imprinted gene	Symbol of known imprinted gene	Mean maternal TPM	Mean paternal TPM	Allelic expression ratio of maternal allele
Maternal-restricted A compartments	1	11520000	11540000	0.23736	-0.167177	0.404537	-	-	-	-	-
Maternal-restricted A compartments	1	14200000	14220000	0.195354	-0.104721	0.300076	-	-	-	-	-
Maternal-restricted A compartments	1	18480000	18500000	0.242834	-0.133524	0.376358	-	-	-	-	-
Maternal-restricted A compartments	1	19080000	19100000	0.330456	-0.12544	0.455896	-	-	-	-	-
Maternal-restricted A compartments	1	19660000	19680000	0.361665	-0.0632214	0.424886	-	-	-	-	-
Maternal-restricted A compartments	1	25760000	25780000	0.449072	-0.0942021	0.543274	-	-	-	-	-
Maternal-restricted A compartments	1	26300000	26320000	0.194358	-0.0566599	0.251018	-	-	-	-	-
Maternal-restricted A compartments	1	28400000	28420000	0.119327	-0.347481	0.466808	-	-	-	-	-
Maternal-restricted A compartments	1	29500000	29520000	0.326309	-0.318503	0.644812	-	-	-	-	-
Maternal-restricted A compartments	1	34920000	34940000	0.117623	-0.499776	0.617398	-	-	-	-	-
Maternal-restricted A compartments	1	36940000	36960000	0.0355691	-0.363881	0.39945	-	-	-	-	-
Maternal-restricted A compartments	1	37920000	37940000	0.0894721	-0.323661	0.413133	-	-	-	-	-
Maternal-restricted A compartments	1	39880000	39900000	0.344049	-0.0862533	0.430302	-	-	-	-	-
Maternal-restricted A compartments	1	40000000	40020000	0.153952	-0.218434	0.372386	-	-	-	-	-
Maternal-restricted A compartments	1	40060000	40080000	0.262901	-0.219451	0.482351	-	-	-	-	-
Maternal-restricted A compartments	1	53140000	53160000	0.249493	-0.0805828	0.330076	-	-	-	-	-
Maternal-restricted A compartments	1	67520000	67540000	0.176766	-0.309191	0.485956	-	-	-	-	-
Maternal-restricted A compartments	1	71580000	71600000	0.179656	-0.155994	0.335649	-	-	-	-	-
Maternal-restricted A compartments	1	78420000	78440000	0.0937505	-0.279947	0.373697	-	-	-	-	-
Maternal-restricted A compartments	1	79180000	79200000	0.100634	-0.100676	0.20131	-	-	-	-	-
Maternal-restricted A compartments	1	86340000	86360000	0.266925	-0.223996	0.490921	-	-	-	-	-
Maternal-restricted A compartments	1	105560000	105580000	0.104996	-0.099794	0.20479	-	-	-	-	-
Maternal-restricted A compartments	1	116200000	116220000	0.0990478	-0.269103	0.36815	-	-	-	-	-
Maternal-restricted A compartments	1	132280000	132300000	0.135594	-0.209866	0.34546	-	-	-	-	-
Maternal-restricted A compartments	1	159400000	159420000	0.176112	-0.199026	0.375138	-	-	-	-	-
Maternal-restricted A compartments	1	181200000	181220000	0.346785	-0.156908	0.503692	-	-	-	-	-
Maternal-restricted A compartments	1	185320000	185340000	0.2642	-0.0962955	0.360496	-	-	-	-	-
Maternal-restricted A compartments	1	194020000	194040000	0.113806	-0.182611	0.296416	-	-	-	-	-
Maternal-restricted A compartments	1	194120000	194140000	0.0931529	-0.153321	0.246474	-	-	-	-	-
Maternal-restricted A compartments	1	194300000	194320000	0.236245	-0.109991	0.346235	-	-	-	-	-
Maternal-restricted A compartments	1	202620000	202640000	0.287656	-0.14779	0.435446	-	-	-	-	-
Maternal-restricted A compartments	1	202660000	202680000	0.431657	-0.212125	0.643782	-	-	-	-	-
Maternal-restricted A compartments	1	202720000	202740000	0.123098	-0.399716	0.522814	-	-	-	-	-
Maternal-restricted A compartments	1	202840000	202860000	0.300787	-0.344249	0.645036	-	-	-	-	-
Maternal-restricted A compartments	1	202860000	202880000	0.14438	-0.455318	0.599698	-	-	-	-	-
Maternal-restricted A compartments	1	207920000	207940000	0.277294	-0.195611	0.472904	-	-	-	-	-
Maternal-restricted A compartments	1	213680000	213700000	0.381472	-0.104074	0.485546	-	-	-	-	-
Maternal-restricted A compartments	1	213720000	213740000	0.19951	-0.157944	0.357454	-	-	-	-	-
Maternal-restricted A compartments	1	216660000	216680000	0.10437	-0.207974	0.312344	-	-	-	-	-
Maternal-restricted A compartments	1	218480000	218500000	0.179695	-0.109049	0.288744	-	-	-	-	-
Maternal-restricted A compartments	1	218560000	218580000	0.0944773	-0.288233	0.38271	-	-	-	-	-
Maternal-restricted A compartments	1	225060000	225080000	0.106526	-0.019495	0.126021	-	-	-	-	-
Maternal-restricted A compartments	1	232280000	232300000	0.193996	-0.0924373	0.286433	-	-	-	-	-
Maternal-restricted A compartments	1	232760000	232780000	0.0642856	-0.223206	0.287491	-	-	-	-	-
Maternal-restricted A compartments	1	243180000	243200000	0.205115	-0.140451	0.345566	-	-	-	-	-
Maternal-restricted A compartments	1	251520000	251540000	0.0581643	-0.279468	0.337632	-	-	-	-	-
Maternal-restricted A compartments	1	257500000	257520000	0.12809	-0.504222	0.632312	-	-	-	-	-
Maternal-restricted A compartments	2	18520000	18540000	0.21759	-0.30475	0.52234	-	-	-	-	-
Maternal-restricted A compartments	2	18560000	18580000	0.214653	-0.232069	0.446722	-	-	-	-	-
Maternal-restricted A compartments	2	27520000	27540000	0.276468	-0.144486	0.420955	-	-	-	-	-
Maternal-restricted A compartments	2	28020000	28040000	0.294504	-0.342254	0.636758	-	-	-	-	-
Maternal-restricted A compartments	2	39400000	39420000	0.1163	-0.236406	0.352707	-	-	-	-	-
Maternal-restricted A compartments	2	49360000	49380000	0.174272	-0.220863	0.395135	-	-	-	-	-
Maternal-restricted A compartments	2	49400000	49420000	0.256367	-0.172245	0.428612	-	-	-	-	-
Maternal-restricted A compartments	2	83140000	83160000	0.274611	-0.221317	0.495928	-	-	-	-	-
Maternal-restricted A compartments	2	83180000	83200000	0.0712615	-0.413178	0.484439	-	-	-	-	-
Maternal-restricted A compartments	2	83240000	83260000	0.244086	-0.300258	0.544345	-	-	-	-	-
Maternal-restricted A compartments	2	83280000	83300000	0.17412	-0.295608	0.469728	-	-	-	-	-
Maternal-restricted A compartments	2	83300000	83320000	0.316178	-0.115591	0.431769	-	-	-	-	-
Maternal-restricted A compartments	2	117140000	117160000	0.107656	-0.230054	0.337709	-	-	-	-	-
Maternal-restricted A compartments	2	117840000	117860000	0.244288	-0.420641	0.664929	-	-	-	-	-
Maternal-restricted A compartments	2	135520000	135540000	0.329864	-0.237102	0.566967	-	-	-	-	-
Maternal-restricted A compartments	2	135780000	135800000	0.365601	-0.314615	0.680216	-	-	-	-	-
Maternal-restricted A compartments	2	135840000	135860000	0.159363	-0.315331	0.474695	-	-	-	-	-
Maternal-restricted A compartments	2	144840000	144860000	0.290443	-0.179398	0.469841	-	-	-	-	-
Maternal-restricted A compartments	2	144940000	144960000	0.349524	-0.229625	0.579149	-	-	-	-	-
Maternal-restricted A compartments	3	12600000	12620000	0.161793	-0.303614	0.465407	-	-	-	-	-
Maternal-restricted A compartments	3	13440000	13460000	0.0827618	-0.0949998	0.177762	-	-	-	-	-
Maternal-restricted A compartments	3	45700000	45720000	0.146214	-0.12633	0.272544	-	-	-	-	-
Maternal-restricted A compartments	3	52880000	52900000	0.0469556	-0.255568	0.302524	-	-	-	-	-
Maternal-restricted A compartments	3	53840000	53860000	0.101291	-0.274624	0.375915	-	-	-	-	-
Maternal-restricted A compartments	3	54620000	54640000	0.298373	-0.119988	0.418361	-	-	-	-	-
Maternal-restricted A compartments	3	55260000	55280000	0.312865	-0.298764	0.611629	-	-	-	-	-
Maternal-restricted A compartments	3	56140000	56160000	0.284109	-0.257685	0.541794	-	-	-	-	-
Maternal-restricted A compartments	3	80140000	80160000	0.180705	-0.362462	0.543168	-	-	-	-	-
Maternal-restricted A compartments	3	92280000	92300000	0.251142	-0.145385	0.396527	-	-	-	-	-
Maternal-restricted A compartments	3	127760000	127780000	0.317823	-0.114442	0.432266	-	-	-	-	-
Maternal-restricted A compartments	3	132000000	132020000	0.54404	-0.527804	1.07184	-	-	-	-	-
Maternal-restricted A compartments	4	3880000	3900000	0.16954	-0.215275	0.384815	-	-	-	-	-
Maternal-restricted A compartments	4	6220000	6240000	0.393178	-0.142596	0.535774	-	-	-	-	-
Maternal-restricted A compartments	4	6540000	6560000	0.200536	-0.38198	0.582516	-	-	-	-	-
Maternal-restricted A compartments	4	9600000	9620000	0.193007	-0.243637	0.436644	-	-	-	-	-
Maternal-restricted A compartments	4	13700000	13720000	0.224207	-0.13513	0.359337	-	-	-	-	-
Maternal-restricted A compartments	4	18320000	18340000	0.261857	-0.258974	0.520831	-	-	-	-	-
Maternal-restricted A compartments	4	22820000	22840000	0.165258	-0.239585	0.404844	-	-	-	-	-
Maternal-restricted A compartments	4	32080000	32100000	0.118585	-0.261394	0.379979	-	-	-	-	-
Maternal-restricted A compartments	4	33840000	33860000	0.263593	-0.137404	0.400997	-	-	-	-	-
Maternal-restricted A compartments	4	36300000	36320000	0.218461	-0.240569	0.45903	-	-	-	-	-
Maternal-restricted A compartments	4	37640000	37660000	0.185574	-0.258045	0.443619	-	-	-	-	-
Maternal-restricted A compartments	4	39940000	39960000	0.143715	-0.0620514	0.205767	-	-	-	-	-
Maternal-restricted A compartments	4	41560000	41580000	0.117711	-0.15324	0.270951	-	-	-	-	-
Maternal-restricted A compartments	4	65060000	65080000	0.079494	-0.133392	0.212886	-	-	-	-	-
Maternal-restricted A compartments	4	74600000	74620000	0.196768	-0.296476	0.493244	-	-	-	-	-
Maternal-restricted A compartments	4	75940000	75960000	0.380497	-0.271072	0.651568	-	-	-	-	-
Maternal-restricted A compartments	4	77220000	77240000	0.374916	-0.259095	0.634011	-	-	-	-	-
Maternal-restricted A compartments	4	79740000	79760000	0.339993	-0.263701	0.603693	-	-	-	-	-
Maternal-restricted A compartments	5	12200000	12220000	0.257602	-0.119556	0.377158	-	-	-	-	-
Maternal-restricted A compartments	5	12540000	12560000	0.112563	-0.199223	0.311786	-	-	-	-	-
Maternal-restricted A compartments	5	12920000	12940000	0.342044	-0.137608	0.479653	-	-	-	-	-
Maternal-restricted A compartments	5	13020000	13040000	0.101639	-0.231957	0.333596	-	-	-	-	-
Maternal-restricted A compartments	5	93300000	93320000	0.394396	-0.072493	0.466889	-	-	-	-	-
Maternal-restricted A compartments	5	104020000	104040000	0.161314	-0.30083	0.462144	-	-	-	-	-
Maternal-restricted A compartments	6	6260000	6280000	0.262597	-0.419314	0.681911	-	-	-	-	-
Maternal-restricted A compartments	6	8320000	8340000	0.0633075	-0.143048	0.206356	-	-	-	-	-
Maternal-restricted A compartments	6	8420000	8440000	0.0908871	-0.245372	0.336259	-	-	-	-	-
Maternal-restricted A compartments	6	8780000	8800000	0.188712	-0.23354	0.422252	-	-	-	-	-
Maternal-restricted A compartments	6	9040000	9060000	0.189624	-0.181222	0.370845	-	-	-	-	-
Maternal-restricted A compartments	6	30800000	30820000	0.0900575	-0.469492	0.559549	-	-	-	-	-
Maternal-restricted A compartments	6	151040000	151060000	0.204043	-0.189878	0.393921	-	-	-	-	-
Maternal-restricted A compartments	6	151060000	151080000	0.160562	-0.226882	0.387444	-	-	-	-	-
Maternal-restricted A compartments	6	157240000	157260000	0.41959	-0.292996	0.712586	-	-	-	-	-
Maternal-restricted A compartments	6	157260000	157280000	0.126722	-0.17854	0.305262	-	-	-	-	-
Maternal-restricted A compartments	6	163900000	163920000	0.131416	-0.636917	0.768333	-	-	-	-	-
Maternal-restricted A compartments	6	164120000	164140000	0.173491	-0.497823	0.671314	-	-	-	-	-
Maternal-restricted A compartments	7	35000000	35020000	0.232778	-0.159974	0.392751	-	-	-	-	-
Maternal-restricted A compartments	7	39540000	39560000	0.249397	-0.27536	0.524757	-	-	-	-	-
Maternal-restricted A compartments	7	49980000	50000000	0.32399	-0.339774	0.663763	-	-	-	-	-
Maternal-restricted A compartments	7	50040000	50060000	0.175056	-0.243606	0.418662	-	-	-	-	-
Maternal-restricted A compartments	7	50760000	50780000	0.107503	-0.360118	0.467621	-	-	-	-	-
Maternal-restricted A compartments	7	50960000	50980000	0.322188	-0.169077	0.491265	-	-	-	-	-
Maternal-restricted A compartments	7	60840000	60860000	0.179164	-0.218381	0.397545	-	-	-	-	-
Maternal-restricted A compartments	7	89540000	89560000	0.121489	-0.210404	0.331893	-	-	-	-	-
Maternal-restricted A compartments	7	89600000	89620000	0.141981	-0.217858	0.359839	-	-	-	-	-
Maternal-restricted A compartments	7	93620000	93640000	0.499904	-0.0969231	0.596827	-	-	-	-	-
Maternal-restricted A compartments	7	95140000	95160000	0.184575	-0.0928453	0.277421	-	-	-	-	-
Maternal-restricted A compartments	7	114960000	114980000	0.303271	-0.162444	0.465715	-	-	-	-	-
Maternal-restricted A compartments	7	115020000	115040000	0.353741	-0.175182	0.528923	-	-	-	-	-
Maternal-restricted A compartments	7	120320000	120340000	0.489114	-0.231999	0.721113	-	-	-	-	-
Maternal-restricted A compartments	8	10220000	10240000	0.531527	-0.166869	0.698397	-	-	-	-	-
Maternal-restricted A compartments	8	14660000	14680000	0.0569633	-0.0880807	0.145044	-	-	-	-	-
Maternal-restricted A compartments	8	28500000	28520000	0.370026	-0.242732	0.612758	-	-	-	-	-
Maternal-restricted A compartments	8	34480000	34500000	0.231919	-0.204997	0.436916	-	-	-	-	-
Maternal-restricted A compartments	8	34540000	34560000	0.320029	-0.140615	0.460644	-	-	-	-	-
Maternal-restricted A compartments	8	34560000	34580000	0.183096	-0.310407	0.493503	-	-	-	-	-
Maternal-restricted A compartments	8	34580000	34600000	0.216811	-0.486338	0.703149	-	-	-	-	-
Maternal-restricted A compartments	8	34760000	34780000	0.119785	-0.232606	0.352391	-	-	-	-	-
Maternal-restricted A compartments	8	34880000	34900000	0.310006	-0.320468	0.630474	-	-	-	-	-
Maternal-restricted A compartments	8	35060000	35080000	0.351381	-0.0777927	0.429174	-	-	-	-	-
Maternal-restricted A compartments	8	35760000	35780000	0.196275	-0.247152	0.443428	-	-	-	-	-
Maternal-restricted A compartments	8	36040000	36060000	0.313206	-0.234237	0.547444	-	-	-	-	-
Maternal-restricted A compartments	8	54340000	54360000	0.641407	-0.204239	0.845647	-	-	-	-	-
Maternal-restricted A compartments	8	105980000	106000000	0.29648	-0.512987	0.809467	-	-	-	-	-
Maternal-restricted A compartments	8	106040000	106060000	0.452716	-0.292478	0.745195	-	-	-	-	-
Maternal-restricted A compartments	8	106100000	106120000	0.449822	-0.379162	0.828983	-	-	-	-	-
Maternal-restricted A compartments	8	106180000	106200000	0.370417	-0.0865709	0.456988	-	-	-	-	-
Maternal-restricted A compartments	8	107120000	107140000	0.436492	-0.175047	0.611539	-	-	-	-	-
Maternal-restricted A compartments	8	107180000	107200000	0.290872	-0.263876	0.554748	-	-	-	-	-
Maternal-restricted A compartments	8	107340000	107360000	0.347051	-0.355005	0.702055	-	-	-	-	-
Maternal-restricted A compartments	8	107520000	107540000	0.30763	-0.206628	0.514258	-	-	-	-	-
Maternal-restricted A compartments	8	107560000	107580000	0.418732	-0.293559	0.712291	-	-	-	-	-
Maternal-restricted A compartments	8	107600000	107620000	0.425355	-0.297573	0.722929	-	-	-	-	-
Maternal-restricted A compartments	8	111320000	111340000	0.396856	-0.264619	0.661476	-	-	-	-	-
Maternal-restricted A compartments	8	111340000	111360000	0.324032	-0.185993	0.510025	-	-	-	-	-
Maternal-restricted A compartments	8	113160000	113180000	0.201564	-0.260598	0.462163	-	-	-	-	-
Maternal-restricted A compartments	8	113180000	113200000	0.252115	-0.139634	0.391749	-	-	-	-	-
Maternal-restricted A compartments	8	114520000	114540000	0.283126	-0.616494	0.89962	-	-	-	-	-
Maternal-restricted A compartments	8	114540000	114560000	0.236769	-0.394069	0.630838	-	-	-	-	-
Maternal-restricted A compartments	8	114560000	114580000	0.146914	-0.287462	0.434375	-	-	-	-	-
Maternal-restricted A compartments	8	114580000	114600000	0.304686	-0.459194	0.76388	-	-	-	-	-
Maternal-restricted A compartments	8	114620000	114640000	0.305611	-0.451317	0.756928	-	-	-	-	-
Maternal-restricted A compartments	8	114680000	114700000	0.264206	-0.289096	0.553301	-	-	-	-	-
Maternal-restricted A compartments	8	114740000	114760000	0.469517	-0.218969	0.688485	-	-	-	-	-
Maternal-restricted A compartments	8	114760000	114780000	0.360324	-0.317904	0.678229	-	-	-	-	-
Maternal-restricted A compartments	8	114900000	114920000	0.333233	-0.384081	0.717313	-	-	-	-	-
Maternal-restricted A compartments	8	115000000	115020000	0.322366	-0.398665	0.721031	-	-	-	-	-
Maternal-restricted A compartments	8	116880000	116900000	0.386626	-0.209045	0.595671	-	-	-	-	-
Maternal-restricted A compartments	8	117000000	117020000	0.358258	-0.30357	0.661827	-	-	-	-	-
Maternal-restricted A compartments	8	117340000	117360000	0.254668	-0.320207	0.574875	-	-	-	-	-
Maternal-restricted A compartments	8	117780000	117800000	0.320919	-0.0846308	0.40555	-	-	-	-	-
Maternal-restricted A compartments	8	117800000	117820000	0.505321	-0.190539	0.695859	-	-	-	-	-
Maternal-restricted A compartments	8	118780000	118800000	0.201357	-0.454443	0.6558	-	-	-	-	-
Maternal-restricted A compartments	8	119140000	119160000	0.283786	-0.203078	0.486864	-	-	-	-	-
Maternal-restricted A compartments	8	119880000	119900000	0.222542	-0.247438	0.46998	-	-	-	-	-
Maternal-restricted A compartments	8	121120000	121140000	0.366477	-0.361052	0.727528	-	-	-	-	-
Maternal-restricted A compartments	8	121160000	121180000	0.323663	-0.270513	0.594176	-	-	-	-	-
Maternal-restricted A compartments	8	122360000	122380000	0.145279	-0.527931	0.67321	-	-	-	-	-
Maternal-restricted A compartments	8	122580000	122600000	0.253374	-0.337027	0.590401	-	-	-	-	-
Maternal-restricted A compartments	8	122760000	122780000	0.220751	-0.375844	0.596594	-	-	-	-	-
Maternal-restricted A compartments	8	123600000	123620000	0.326519	-0.0821152	0.408634	-	-	-	-	-
Maternal-restricted A compartments	8	123660000	123680000	0.30911	-0.259403	0.568513	-	-	-	-	-
Maternal-restricted A compartments	8	123820000	123840000	0.302899	-0.169734	0.472633	-	-	-	-	-
Maternal-restricted A compartments	8	123880000	123900000	0.338914	-0.262156	0.60107	-	-	-	-	-
Maternal-restricted A compartments	8	123900000	123920000	0.399593	-0.147732	0.547325	-	-	-	-	-
Maternal-restricted A compartments	8	125600000	125620000	0.531982	-0.229568	0.76155	-	-	-	-	-
Maternal-restricted A compartments	8	126000000	126020000	0.425811	-0.18155	0.607361	-	-	-	-	-
Maternal-restricted A compartments	8	126540000	126560000	0.210665	-0.356271	0.566936	-	-	-	-	-
Maternal-restricted A compartments	8	126740000	126760000	0.205835	-0.249812	0.455647	-	-	-	-	-
Maternal-restricted A compartments	8	126780000	126800000	0.15882	-0.25054	0.40936	-	-	-	-	-
Maternal-restricted A compartments	8	126920000	126940000	0.375703	-0.204499	0.580202	-	-	-	-	-
Maternal-restricted A compartments	8	128040000	128060000	0.443711	-0.339688	0.783399	-	-	-	-	-
Maternal-restricted A compartments	8	128080000	128100000	0.169902	-0.22941	0.399312	-	-	-	-	-
Maternal-restricted A compartments	8	128220000	128240000	0.406771	-0.233575	0.640347	-	-	-	-	-
Maternal-restricted A compartments	8	137520000	137540000	0.129076	-0.537274	0.666349	-	-	-	-	-
Maternal-restricted A compartments	9	2500000	2520000	0.158432	-0.384263	0.542694	-	-	-	-	-
Maternal-restricted A compartments	9	11920000	11940000	0.187246	-0.191106	0.378353	-	-	-	-	-
Maternal-restricted A compartments	9	16920000	16940000	0.215323	-0.221873	0.437196	-	-	-	-	-
Maternal-restricted A compartments	9	21980000	22000000	0.134306	-0.345578	0.479884	-	-	-	-	-
Maternal-restricted A compartments	9	28420000	28440000	0.148621	-0.327172	0.475793	-	-	-	-	-
Maternal-restricted A compartments	9	32800000	32820000	0.0711957	-0.289823	0.361019	-	-	-	-	-
Maternal-restricted A compartments	9	36940000	36960000	0.118269	-0.304789	0.423059	-	-	-	-	-
Maternal-restricted A compartments	9	37080000	37100000	0.0529585	-0.272047	0.325005	-	-	-	-	-
Maternal-restricted A compartments	9	37180000	37200000	0.135269	-0.287828	0.423097	-	-	-	-	-
Maternal-restricted A compartments	9	52960000	52980000	0.463275	-0.385899	0.849174	-	-	-	-	-
Maternal-restricted A compartments	9	67580000	67600000	0.37445	-0.128358	0.502808	-	-	-	-	-
Maternal-restricted A compartments	9	70500000	70520000	0.255333	-0.142006	0.397339	-	-	-	-	-
Maternal-restricted A compartments	9	70660000	70680000	0.0932066	-0.230444	0.32365	-	-	-	-	-
Maternal-restricted A compartments	9	70720000	70740000	0.356625	-0.0781474	0.434773	-	-	-	-	-
Maternal-restricted A compartments	9	70740000	70760000	0.0672786	-0.278095	0.345374	-	-	-	-	-
Maternal-restricted A compartments	9	72520000	72540000	0.228894	-0.328307	0.557202	-	-	-	-	-
Maternal-restricted A compartments	9	80680000	80700000	0.11693	-0.142513	0.259443	-	-	-	-	-
Maternal-restricted A compartments	9	91360000	91380000	0.161065	-0.204718	0.365782	-	-	-	-	-
Maternal-restricted A compartments	9	91480000	91500000	0.0888271	-0.296966	0.385793	-	-	-	-	-
Maternal-restricted A compartments	9	92160000	92180000	0.287024	-0.111237	0.398262	-	-	-	-	-
Maternal-restricted A compartments	9	114060000	114080000	0.159464	-0.262751	0.422214	-	-	-	-	-
Maternal-restricted A compartments	9	126460000	126480000	0.262107	-0.337156	0.599262	-	-	-	-	-
Maternal-restricted A compartments	9	133060000	133080000	0.362333	-0.287173	0.649506	-	-	-	-	-
Maternal-restricted A compartments	11	26060000	26080000	0.084231	-0.455346	0.539577	-	-	-	-	-
Maternal-restricted A compartments	11	32960000	32980000	0.0754931	-0.287716	0.363209	-	-	-	-	-
Maternal-restricted A compartments	11	48660000	48680000	0.204405	-0.142876	0.347281	-	-	-	-	-
Maternal-restricted A compartments	11	49480000	49500000	0.134203	-0.178035	0.312238	-	-	-	-	-
Maternal-restricted A compartments	11	49500000	49520000	0.324849	-0.321968	0.646817	-	-	-	-	-
Maternal-restricted A compartments	11	57800000	57820000	0.320983	-0.227258	0.54824	-	-	-	-	-
Maternal-restricted A compartments	11	63640000	63660000	0.244652	-0.426737	0.671389	-	-	-	-	-
Maternal-restricted A compartments	12	17320000	17340000	0.266627	-0.293875	0.560502	-	-	-	-	-
Maternal-restricted A compartments	12	17900000	17920000	0.429691	-0.956486	1.38618	-	-	-	-	-
Maternal-restricted A compartments	12	34520000	34540000	0.320214	-0.229944	0.550158	-	-	-	-	-
Maternal-restricted A compartments	12	37560000	37580000	0.369571	-0.416821	0.786392	-	-	-	-	-
Maternal-restricted A compartments	12	38780000	38800000	0.204935	-0.182851	0.387786	-	-	-	-	-
Maternal-restricted A compartments	12	53980000	54000000	0.281334	-0.331688	0.613022	-	-	-	-	-
Maternal-restricted A compartments	12	58700000	58720000	0.215222	-0.469863	0.685085	-	-	-	-	-
Maternal-restricted A compartments	13	1000000	1020000	0.318745	-0.217796	0.536541	-	-	-	-	-
Maternal-restricted A compartments	13	2420000	2440000	0.414225	-0.0917257	0.50595	-	-	-	-	-
Maternal-restricted A compartments	13	43760000	43780000	0.094705	-0.0528953	0.1476	-	-	-	-	-
Maternal-restricted A compartments	13	47120000	47140000	0.178183	-0.175646	0.353829	-	-	-	-	-
Maternal-restricted A compartments	13	47800000	47820000	0.10227	-0.106491	0.208762	-	-	-	-	-
Maternal-restricted A compartments	13	97020000	97040000	0.327435	-0.130509	0.457943	-	-	-	-	-
Maternal-restricted A compartments	13	99920000	99940000	0.114053	-0.201248	0.315302	-	-	-	-	-
Maternal-restricted A compartments	13	106840000	106860000	0.158125	-0.149274	0.307399	-	-	-	-	-
Maternal-restricted A compartments	13	110380000	110400000	0.140565	-0.220343	0.360908	-	-	-	-	-
Maternal-restricted A compartments	13	126260000	126280000	0.234722	-0.215474	0.450195	-	-	-	-	-
Maternal-restricted A compartments	13	128640000	128660000	0.187558	-0.129058	0.316616	-	-	-	-	-
Maternal-restricted A compartments	13	138980000	139000000	0.076437	-0.0934598	0.169897	-	-	-	-	-
Maternal-restricted A compartments	13	139640000	139660000	0.124234	-0.162426	0.28666	-	-	-	-	-
Maternal-restricted A compartments	13	141800000	141820000	0.205387	-0.231709	0.437096	-	-	-	-	-
Maternal-restricted A compartments	13	142080000	142100000	0.170095	-0.176118	0.346213	-	-	-	-	-
Maternal-restricted A compartments	13	142980000	143000000	0.180292	-0.287447	0.46774	-	-	-	-	-
Maternal-restricted A compartments	13	143460000	143480000	0.300868	-0.23038	0.531248	-	-	-	-	-
Maternal-restricted A compartments	13	143500000	143520000	0.264052	-0.216053	0.480105	-	-	-	-	-
Maternal-restricted A compartments	13	144140000	144160000	0.0946279	-0.412252	0.50688	-	-	-	-	-
Maternal-restricted A compartments	13	147320000	147340000	0.339543	-0.13556	0.475103	-	-	-	-	-
Maternal-restricted A compartments	13	151740000	151760000	0.184812	-0.103066	0.287878	-	-	-	-	-
Maternal-restricted A compartments	13	159100000	159120000	0.35083	-0.122945	0.473775	-	-	-	-	-
Maternal-restricted A compartments	13	201840000	201860000	0.399472	-0.377333	0.776806	-	-	-	-	-
Maternal-restricted A compartments	14	5700000	5720000	0.355623	-0.260186	0.615809	-	-	-	-	-
Maternal-restricted A compartments	14	5800000	5820000	0.0965702	-0.183228	0.279798	-	-	-	-	-
Maternal-restricted A compartments	14	6160000	6180000	0.285449	-0.230244	0.515693	-	-	-	-	-
Maternal-restricted A compartments	14	61100000	61120000	0.141191	-0.131069	0.27226	-	-	-	-	-
Maternal-restricted A compartments	14	66700000	66720000	0.0666918	-0.189137	0.255829	-	-	-	-	-
Maternal-restricted A compartments	14	66720000	66740000	0.171867	-0.163414	0.335281	-	-	-	-	-
Maternal-restricted A compartments	14	103540000	103560000	0.129881	-0.0899015	0.219782	-	-	-	-	-
Maternal-restricted A compartments	14	131100000	131120000	0.136318	-0.0678265	0.204144	-	-	-	-	-
Maternal-restricted A compartments	15	540000	560000	0.376137	-0.231114	0.607251	-	-	-	-	-
Maternal-restricted A compartments	15	7220000	7240000	0.246905	-0.248594	0.495499	-	-	-	-	-
Maternal-restricted A compartments	15	13120000	13140000	0.159675	-0.214961	0.374636	-	-	-	-	-
Maternal-restricted A compartments	15	16720000	16740000	0.191318	-0.0377162	0.229034	-	-	-	-	-
Maternal-restricted A compartments	15	54140000	54160000	0.223986	-0.1419	0.365886	-	-	-	-	-
Maternal-restricted A compartments	15	96520000	96540000	0.108391	-0.298664	0.407055	-	-	-	-	-
Maternal-restricted A compartments	15	108300000	108320000	0.0427318	-0.151573	0.194305	-	-	-	-	-
Maternal-restricted A compartments	15	108420000	108440000	0.207194	-0.163939	0.371133	-	-	-	-	-
Maternal-restricted A compartments	15	112760000	112780000	0.3017	-0.0330937	0.334793	-	-	-	-	-
Maternal-restricted A compartments	15	112820000	112840000	0.324271	-0.171709	0.49598	-	-	-	-	-
Maternal-restricted A compartments	15	121860000	121880000	0.229647	-0.0841043	0.313751	-	-	-	-	-
Maternal-restricted A compartments	15	121960000	121980000	0.182164	-0.15473	0.336894	-	-	-	-	-
Maternal-restricted A compartments	15	124660000	124680000	0.136391	-0.183652	0.320042	-	-	-	-	-
Maternal-restricted A compartments	15	126680000	126700000	0.0782544	-0.197185	0.275439	-	-	-	-	-
Maternal-restricted A compartments	15	130560000	130580000	0.272559	-0.117086	0.389645	-	-	-	-	-
Maternal-restricted A compartments	16	3380000	3400000	0.140731	-0.122915	0.263646	-	-	-	-	-
Maternal-restricted A compartments	16	38680000	38700000	0.119926	-0.116308	0.236234	-	-	-	-	-
Maternal-restricted A compartments	16	44020000	44040000	0.0727638	-0.0671414	0.139905	-	-	-	-	-
Maternal-restricted A compartments	16	72300000	72320000	0.0721471	-0.195486	0.267633	-	-	-	-	-
Maternal-restricted A compartments	16	77240000	77260000	0.026214	-0.22617	0.252384	-	-	-	-	-
Maternal-restricted A compartments	16	77380000	77400000	0.128225	-0.111654	0.239879	-	-	-	-	-
Maternal-restricted A compartments	16	77520000	77540000	0.203147	-0.198276	0.401423	-	-	-	-	-
Maternal-restricted A compartments	16	78180000	78200000	0.117804	-0.182702	0.300506	-	-	-	-	-
Maternal-restricted A compartments	16	78220000	78240000	0.159454	-0.389885	0.549339	-	-	-	-	-
Maternal-restricted A compartments	17	14460000	14480000	0.628579	-0.383649	1.01223	-	-	-	-	-
Maternal-restricted A compartments	17	14600000	14620000	0.706803	-0.339086	1.04589	-	-	-	-	-
Maternal-restricted A compartments	17	26620000	26640000	0.295383	-0.213448	0.508831	-	-	-	-	-
Maternal-restricted A compartments	17	27440000	27460000	0.32563	-0.241988	0.567618	-	-	-	-	-
Maternal-restricted A compartments	17	57540000	57560000	0.568451	-0.194996	0.763447	-	-	-	-	-
Maternal-restricted A compartments	17	57560000	57580000	0.399988	-0.0639524	0.46394	-	-	-	-	-
Maternal-restricted A compartments	18	6960000	6980000	0.111037	-0.230593	0.341631	-	-	-	-	-
Maternal-restricted A compartments	18	10680000	10700000	0.322159	-0.125026	0.447186	-	-	-	-	-
Maternal-restricted A compartments	18	10720000	10740000	0.259434	-0.107532	0.366967	-	-	-	-	-
Maternal-restricted A compartments	18	10760000	10780000	0.220692	-0.326745	0.547437	-	-	-	-	-
Maternal-restricted A compartments	18	23740000	23760000	0.181799	-0.378506	0.560306	-	-	-	-	-
Maternal-restricted A compartments	18	45540000	45560000	0.276066	-0.146984	0.42305	-	-	-	-	-
Maternal-restricted A compartments	18	52040000	52060000	0.299725	-0.197684	0.497409	-	-	-	-	-
More active compartments in maternal	1	14300000	14320000	-1.75883	-2.39581	0.636985	-	-	-	-	-
More active compartments in maternal	1	14520000	14540000	-0.700204	-1.28739	0.587182	-	-	-	-	-
More active compartments in maternal	1	14720000	14740000	1.14161	0.62835	0.513257	-	-	-	-	-
More active compartments in maternal	1	16000000	16020000	3.39874	2.82111	0.577636	-	-	-	-	-
More active compartments in maternal	1	31120000	31140000	-0.502289	-1.04653	0.544241	-	-	-	-	-
More active compartments in maternal	1	128280000	128300000	4.50841	3.92501	0.583398	-	-	-	-	-
More active compartments in maternal	1	260780000	260800000	2.39458	1.85882	0.535765	-	-	-	-	-
More active compartments in maternal	1	261040000	261060000	2.64995	2.128	0.521952	-	-	-	-	-
More active compartments in maternal	1	265400000	265420000	4.22924	3.68094	0.548291	-	-	-	-	-
More active compartments in maternal	2	1180000	1200000	5.07715	4.42436	0.652789	-	-	-	-	-
More active compartments in maternal	2	1840000	1860000	3.99863	3.4289	0.569723	-	-	-	-	-
More active compartments in maternal	2	1920000	1940000	4.13243	3.61963	0.512798	-	-	-	-	-
More active compartments in maternal	2	61940000	61960000	-1.3406	-2.13049	0.789887	-	-	-	-	-
More active compartments in maternal	2	135120000	135140000	2.47093	1.95803	0.512902	-	-	-	-	-
More active compartments in maternal	3	47080000	47100000	2.45605	1.94761	0.508446	-	-	-	-	-
More active compartments in maternal	3	57200000	57220000	-1.98182	-2.85904	0.877213	-	-	-	-	-
More active compartments in maternal	3	57420000	57440000	1.9095	1.39686	0.512635	-	-	-	-	-
More active compartments in maternal	3	111960000	111980000	6.64163	6.04875	0.59288	-	-	-	-	-
More active compartments in maternal	3	119420000	119440000	-1.73156	-2.27366	0.542091	-	-	-	-	-
More active compartments in maternal	3	131640000	131660000	2.00934	1.5058	0.503546	-	-	-	-	-
More active compartments in maternal	4	4780000	4800000	-0.646938	-1.28463	0.637687	-	-	-	-	-
More active compartments in maternal	4	27700000	27720000	-1.02663	-1.62464	0.598004	-	-	-	-	-
More active compartments in maternal	4	112220000	112240000	-2.07777	-2.59961	0.521848	-	-	-	-	-
More active compartments in maternal	4	130020000	130040000	-1.97549	-2.54691	0.571413	-	-	-	-	-
More active compartments in maternal	5	39960000	39980000	-2.06539	-2.71803	0.652641	-	-	-	-	-
More active compartments in maternal	5	61020000	61040000	-2.29908	-3.17077	0.871693	-	-	-	-	-
More active compartments in maternal	6	700000	720000	8.52275	7.99971	0.523042	-	-	-	-	-
More active compartments in maternal	6	4160000	4180000	5.04008	4.51932	0.520764	-	-	-	-	-
More active compartments in maternal	6	26720000	26740000	-2.28071	-2.90788	0.627171	-	-	-	-	-
More active compartments in maternal	6	52720000	52740000	3.84847	3.33345	0.515019	-	-	-	-	-
More active compartments in maternal	6	169760000	169780000	7.15899	6.48413	0.674867	-	-	-	-	-
More active compartments in maternal	7	820000	840000	1.85228	1.35048	0.501802	-	-	-	-	-
More active compartments in maternal	7	79840000	79860000	-4.90386	-5.43034	0.526486	-	-	-	-	-
More active compartments in maternal	7	120040000	120060000	-0.771008	-1.27588	0.504871	-	-	-	-	-
More active compartments in maternal	7	121640000	121660000	2.35012	1.8223	0.527824	-	-	-	-	-
More active compartments in maternal	7	121660000	121680000	2.24983	1.61607	0.633759	-	-	-	-	-
More active compartments in maternal	9	0	20000	6.00357	5.25903	0.744543	-	-	-	-	-
More active compartments in maternal	9	12420000	12440000	3.14041	1.95785	1.18256	-	-	-	-	-
More active compartments in maternal	10	27200000	27220000	-0.527844	-1.2145	0.686659	-	-	-	-	-
More active compartments in maternal	10	28500000	28520000	-1.11594	-1.72473	0.608795	-	-	-	-	-
More active compartments in maternal	11	64440000	64460000	-0.379976	-1.06785	0.687871	-	-	-	-	-
More active compartments in maternal	11	64840000	64860000	-2.16884	-3.01498	0.84614	-	-	-	-	-
More active compartments in maternal	12	58060000	58080000	-2.77071	-3.30917	0.53846	-	-	-	-	-
More active compartments in maternal	13	13300000	13320000	-0.495513	-1.03481	0.539294	-	-	-	-	-
More active compartments in maternal	13	63160000	63180000	-1.42911	-2.08141	0.652306	-	-	-	-	-
More active compartments in maternal	13	190940000	190960000	-1.25608	-2.14576	0.889686	-	-	-	-	-
More active compartments in maternal	13	196840000	196860000	3.41926	2.78785	0.631411	-	-	-	-	-
More active compartments in maternal	13	200060000	200080000	2.68753	2.15218	0.535346	-	-	-	-	-
More active compartments in maternal	13	203480000	203500000	1.76602	1.25342	0.512597	-	-	-	-	-
More active compartments in maternal	13	207560000	207580000	4.37386	3.85389	0.519963	-	-	-	-	-
More active compartments in maternal	15	20940000	20960000	-2.0516	-2.55239	0.500785	-	-	-	-	-
More active compartments in maternal	15	21580000	21600000	-1.37798	-2.14708	0.769105	-	-	-	-	-
More active compartments in maternal	17	340000	360000	-3.85444	-4.67226	0.817812	-	-	-	-	-
More active compartments in maternal	17	780000	800000	-1.19164	-1.77045	0.578805	-	-	-	-	-
More active compartments in maternal	17	1540000	1560000	-2.52697	-3.12783	0.60086	-	-	-	-	-
Paternal-restricted A compartments	1	25380000	25400000	-0.116615	0.158447	-0.275062	-	-	-	-	-
Paternal-restricted A compartments	1	37580000	37600000	-0.201439	0.0944056	-0.295845	-	-	-	-	-
Paternal-restricted A compartments	1	43960000	43980000	-0.114544	0.117545	-0.232089	-	-	-	-	-
Paternal-restricted A compartments	1	56180000	56200000	-0.19264	0.102917	-0.295557	-	-	-	-	-
Paternal-restricted A compartments	1	56760000	56780000	-0.144353	0.0412727	-0.185626	-	-	-	-	-
Paternal-restricted A compartments	1	78700000	78720000	-0.1488	0.22775	-0.37655	-	-	-	-	-
Paternal-restricted A compartments	1	105340000	105360000	-0.149209	0.255588	-0.404798	-	-	-	-	-
Paternal-restricted A compartments	1	105740000	105760000	-0.169763	0.113755	-0.283518	-	-	-	-	-
Paternal-restricted A compartments	1	112180000	112200000	-0.211479	0.090451	-0.30193	-	-	-	-	-
Paternal-restricted A compartments	1	115580000	115600000	-0.0826342	0.153109	-0.235743	-	-	-	-	-
Paternal-restricted A compartments	1	121460000	121480000	-0.0947131	0.367906	-0.46262	-	-	-	-	-
Paternal-restricted A compartments	1	132300000	132320000	-0.257488	0.147344	-0.404832	-	-	-	-	-
Paternal-restricted A compartments	1	132420000	132440000	-0.126058	0.290073	-0.416131	-	-	-	-	-
Paternal-restricted A compartments	1	137000000	137020000	-0.402492	0.288839	-0.691331	-	-	-	-	-
Paternal-restricted A compartments	1	137220000	137240000	-0.302294	0.172585	-0.474879	-	-	-	-	-
Paternal-restricted A compartments	1	139320000	139340000	-0.254545	0.426939	-0.681484	-	-	-	-	-
Paternal-restricted A compartments	1	139340000	139360000	-0.28004	0.421274	-0.701315	-	-	-	-	-
Paternal-restricted A compartments	1	139360000	139380000	-0.248943	0.531705	-0.780649	-	-	-	-	-
Paternal-restricted A compartments	1	141280000	141300000	-0.276746	0.387523	-0.664268	-	-	-	-	-
Paternal-restricted A compartments	1	141340000	141360000	-0.320096	0.337558	-0.657655	-	-	-	-	-
Paternal-restricted A compartments	1	141360000	141380000	-0.465261	0.245673	-0.710934	-	-	-	-	-
Paternal-restricted A compartments	1	141380000	141400000	-0.468629	0.237782	-0.706411	-	-	-	-	-
Paternal-restricted A compartments	1	141420000	141440000	-0.367927	0.393518	-0.761445	ENSSSCG00000004834	NDN	0.44	91.69	0.005
Paternal-restricted A compartments	1	141580000	141600000	-0.539424	0.312271	-0.851696	-	-	-	-	-
Paternal-restricted A compartments	1	141620000	141640000	-0.59559	0.361943	-0.957533	-	-	-	-	-
Paternal-restricted A compartments	1	141640000	141660000	-0.667127	0.342872	-1.01	-	-	-	-	-
Paternal-restricted A compartments	1	141840000	141860000	-0.228329	0.615123	-0.843452	-	-	-	-	-
Paternal-restricted A compartments	1	142020000	142040000	-0.31933	0.755986	-1.07532	-	-	-	-	-
Paternal-restricted A compartments	1	143380000	143400000	-0.274653	0.182047	-0.4567	-	-	-	-	-
Paternal-restricted A compartments	1	143680000	143700000	-0.241734	0.3491	-0.590835	-	-	-	-	-
Paternal-restricted A compartments	1	146600000	146620000	-0.276763	0.289354	-0.566116	-	-	-	-	-
Paternal-restricted A compartments	1	146980000	147000000	-0.180659	0.423331	-0.60399	-	-	-	-	-
Paternal-restricted A compartments	1	148620000	148640000	-0.264013	0.112305	-0.376318	-	-	-	-	-
Paternal-restricted A compartments	1	148640000	148660000	-0.136206	0.147903	-0.284109	-	-	-	-	-
Paternal-restricted A compartments	1	149700000	149720000	-0.224002	0.107005	-0.331007	-	-	-	-	-
Paternal-restricted A compartments	1	175380000	175400000	-0.134281	0.18639	-0.320671	-	-	-	-	-
Paternal-restricted A compartments	1	189840000	189860000	-0.140788	0.25363	-0.394418	-	-	-	-	-
Paternal-restricted A compartments	1	196140000	196160000	-0.103444	0.316087	-0.419531	-	-	-	-	-
Paternal-restricted A compartments	1	201340000	201360000	-0.487711	0.235021	-0.722732	-	-	-	-	-
Paternal-restricted A compartments	1	219820000	219840000	-0.103965	0.373821	-0.477786	-	-	-	-	-
Paternal-restricted A compartments	1	225880000	225900000	-0.162336	0.175984	-0.33832	-	-	-	-	-
Paternal-restricted A compartments	1	234140000	234160000	-0.115025	0.166013	-0.281038	-	-	-	-	-
Paternal-restricted A compartments	1	248620000	248640000	-0.0922099	0.241876	-0.334086	-	-	-	-	-
Paternal-restricted A compartments	1	249120000	249140000	-0.257216	0.251594	-0.508809	-	-	-	-	-
Paternal-restricted A compartments	1	250580000	250600000	-0.477046	0.240139	-0.717185	-	-	-	-	-
Paternal-restricted A compartments	1	255740000	255760000	-0.0901873	0.0736249	-0.163812	-	-	-	-	-
Paternal-restricted A compartments	2	46280000	46300000	-0.0794205	0.24562	-0.325041	-	-	-	-	-
Paternal-restricted A compartments	2	49480000	49500000	-0.239741	0.15254	-0.392282	-	-	-	-	-
Paternal-restricted A compartments	2	117060000	117080000	-0.0373308	0.104648	-0.141978	-	-	-	-	-
Paternal-restricted A compartments	2	129560000	129580000	-0.355151	0.123973	-0.479124	-	-	-	-	-
Paternal-restricted A compartments	3	12320000	12340000	-0.144802	0.361453	-0.506255	-	-	-	-	-
Paternal-restricted A compartments	3	13360000	13380000	-0.340554	0.154618	-0.495172	-	-	-	-	-
Paternal-restricted A compartments	3	13420000	13440000	-0.18309	0.203743	-0.386834	-	-	-	-	-
Paternal-restricted A compartments	3	14180000	14200000	-0.135244	0.190276	-0.325519	-	-	-	-	-
Paternal-restricted A compartments	3	15440000	15460000	-0.203713	0.229864	-0.433577	-	-	-	-	-
Paternal-restricted A compartments	3	21640000	21660000	-0.421416	0.325805	-0.747222	-	-	-	-	-
Paternal-restricted A compartments	3	27100000	27120000	-0.208191	0.339057	-0.547248	-	-	-	-	-
Paternal-restricted A compartments	3	30300000	30320000	-0.14152	0.422533	-0.564053	-	-	-	-	-
Paternal-restricted A compartments	3	36900000	36920000	-0.400836	0.183376	-0.584211	-	-	-	-	-
Paternal-restricted A compartments	3	45480000	45500000	-0.18483	0.193041	-0.377871	-	-	-	-	-
Paternal-restricted A compartments	3	86900000	86920000	-0.297622	0.214952	-0.512574	-	-	-	-	-
Paternal-restricted A compartments	3	117820000	117840000	-0.173042	0.317265	-0.490307	-	-	-	-	-
Paternal-restricted A compartments	4	13720000	13740000	-0.155637	0.241008	-0.396644	-	-	-	-	-
Paternal-restricted A compartments	4	28220000	28240000	-0.0547394	0.145975	-0.200714	-	-	-	-	-
Paternal-restricted A compartments	4	29020000	29040000	-0.263704	0.225263	-0.488968	-	-	-	-	-
Paternal-restricted A compartments	4	31240000	31260000	-0.210009	0.15056	-0.360569	-	-	-	-	-
Paternal-restricted A compartments	4	37900000	37920000	-0.196974	0.0889575	-0.285931	-	-	-	-	-
Paternal-restricted A compartments	4	39960000	39980000	-0.276664	0.0926588	-0.369323	-	-	-	-	-
Paternal-restricted A compartments	4	40060000	40080000	-0.14638	0.160325	-0.306705	-	-	-	-	-
Paternal-restricted A compartments	4	62020000	62040000	-0.279248	0.30081	-0.580057	-	-	-	-	-
Paternal-restricted A compartments	4	65040000	65060000	-0.0739235	0.273829	-0.347753	-	-	-	-	-
Paternal-restricted A compartments	4	67740000	67760000	-0.169019	0.405927	-0.574946	-	-	-	-	-
Paternal-restricted A compartments	4	68080000	68100000	-0.188281	0.2793	-0.467581	-	-	-	-	-
Paternal-restricted A compartments	4	75880000	75900000	-0.148484	0.318029	-0.466513	-	-	-	-	-
Paternal-restricted A compartments	4	75900000	75920000	-0.262296	0.398806	-0.661102	-	-	-	-	-
Paternal-restricted A compartments	4	75960000	75980000	-0.126382	0.419452	-0.545833	-	-	-	-	-
Paternal-restricted A compartments	4	83680000	83700000	-0.349915	0.238193	-0.588108	-	-	-	-	-
Paternal-restricted A compartments	4	89180000	89200000	-0.230977	0.311123	-0.5421	-	-	-	-	-
Paternal-restricted A compartments	4	89400000	89420000	-0.320922	0.203202	-0.524124	-	-	-	-	-
Paternal-restricted A compartments	4	89420000	89440000	-0.389487	0.128394	-0.517881	-	-	-	-	-
Paternal-restricted A compartments	4	90680000	90700000	-0.303568	0.172903	-0.476471	-	-	-	-	-
Paternal-restricted A compartments	4	106120000	106140000	-0.20402	0.218548	-0.422568	-	-	-	-	-
Paternal-restricted A compartments	4	125500000	125520000	-0.213549	0.259617	-0.473166	-	-	-	-	-
Paternal-restricted A compartments	4	129720000	129740000	-0.0935626	0.463695	-0.557258	-	-	-	-	-
Paternal-restricted A compartments	4	130420000	130440000	-0.217881	0.213326	-0.431206	-	-	-	-	-
Paternal-restricted A compartments	5	12380000	12400000	-0.165	0.225799	-0.390799	-	-	-	-	-
Paternal-restricted A compartments	5	19160000	19180000	-0.274501	0.187753	-0.462254	-	-	-	-	-
Paternal-restricted A compartments	5	23100000	23120000	-0.321503	0.091057	-0.41256	-	-	-	-	-
Paternal-restricted A compartments	5	80240000	80260000	-0.276388	0.0836314	-0.36002	-	-	-	-	-
Paternal-restricted A compartments	5	80280000	80300000	-0.269409	0.101033	-0.370442	-	-	-	-	-
Paternal-restricted A compartments	5	90080000	90100000	-0.249895	0.22781	-0.477705	-	-	-	-	-
Paternal-restricted A compartments	5	103380000	103400000	-0.639044	0.384066	-1.02311	-	-	-	-	-
Paternal-restricted A compartments	5	103400000	103420000	-0.736555	0.503683	-1.24024	-	-	-	-	-
Paternal-restricted A compartments	6	7320000	7340000	-0.313713	0.202166	-0.515879	-	-	-	-	-
Paternal-restricted A compartments	6	8560000	8580000	-0.222615	0.267705	-0.49032	-	-	-	-	-
Paternal-restricted A compartments	6	8660000	8680000	-0.346757	0.157964	-0.504721	-	-	-	-	-
Paternal-restricted A compartments	6	9420000	9440000	-0.239899	0.0599985	-0.299897	-	-	-	-	-
Paternal-restricted A compartments	6	9540000	9560000	-0.146949	0.18097	-0.327918	-	-	-	-	-
Paternal-restricted A compartments	6	9720000	9740000	-0.131429	0.194539	-0.325967	-	-	-	-	-
Paternal-restricted A compartments	6	16060000	16080000	-0.211804	0.21379	-0.425594	-	-	-	-	-
Paternal-restricted A compartments	6	32100000	32120000	-0.291934	0.223864	-0.515798	-	-	-	-	-
Paternal-restricted A compartments	6	37000000	37020000	-0.413551	0.179113	-0.592663	-	-	-	-	-
Paternal-restricted A compartments	7	5160000	5180000	-0.0916911	0.4023	-0.493991	-	-	-	-	-
Paternal-restricted A compartments	7	8860000	8880000	-0.0561915	0.186893	-0.243085	-	-	-	-	-
Paternal-restricted A compartments	7	8880000	8900000	-0.174438	0.231852	-0.40629	-	-	-	-	-
Paternal-restricted A compartments	7	13340000	13360000	-0.133652	0.169942	-0.303594	-	-	-	-	-
Paternal-restricted A compartments	7	16460000	16480000	-0.253227	0.224209	-0.477436	-	-	-	-	-
Paternal-restricted A compartments	7	40380000	40400000	-0.281282	0.163372	-0.444654	-	-	-	-	-
Paternal-restricted A compartments	7	59880000	59900000	-0.421115	0.136584	-0.557699	-	-	-	-	-
Paternal-restricted A compartments	7	67340000	67360000	-0.0817466	0.23195	-0.313696	-	-	-	-	-
Paternal-restricted A compartments	7	114720000	114740000	-0.297576	0.642367	-0.939943	-	-	-	-	-
Paternal-restricted A compartments	8	5040000	5060000	-0.461078	0.125376	-0.586455	-	-	-	-	-
Paternal-restricted A compartments	8	6780000	6800000	-0.370172	0.317126	-0.687299	-	-	-	-	-
Paternal-restricted A compartments	8	6860000	6880000	-0.398612	0.159371	-0.557983	-	-	-	-	-
Paternal-restricted A compartments	8	7040000	7060000	-0.482833	0.314591	-0.797424	-	-	-	-	-
Paternal-restricted A compartments	8	7340000	7360000	-0.190677	0.198858	-0.389535	-	-	-	-	-
Paternal-restricted A compartments	8	12140000	12160000	-0.194043	0.274763	-0.468806	-	-	-	-	-
Paternal-restricted A compartments	8	12160000	12180000	-0.381304	0.316724	-0.698028	-	-	-	-	-
Paternal-restricted A compartments	8	13440000	13460000	-0.157839	0.134155	-0.291994	-	-	-	-	-
Paternal-restricted A compartments	8	14300000	14320000	-0.272927	0.272356	-0.545283	-	-	-	-	-
Paternal-restricted A compartments	8	14520000	14540000	-0.0532938	0.299929	-0.353223	-	-	-	-	-
Paternal-restricted A compartments	8	14940000	14960000	-0.355507	0.234207	-0.589714	-	-	-	-	-
Paternal-restricted A compartments	8	14980000	15000000	-0.346407	0.213244	-0.559652	-	-	-	-	-
Paternal-restricted A compartments	8	15120000	15140000	-0.24024	0.275111	-0.51535	-	-	-	-	-
Paternal-restricted A compartments	8	16200000	16220000	-0.54916	0.172655	-0.721815	-	-	-	-	-
Paternal-restricted A compartments	8	16220000	16240000	-0.553492	0.170314	-0.723806	-	-	-	-	-
Paternal-restricted A compartments	8	16540000	16560000	-0.226221	0.400254	-0.626475	-	-	-	-	-
Paternal-restricted A compartments	8	16600000	16620000	-0.136894	0.217039	-0.353932	-	-	-	-	-
Paternal-restricted A compartments	8	16620000	16640000	-0.205634	0.222246	-0.42788	-	-	-	-	-
Paternal-restricted A compartments	8	16980000	17000000	-0.355543	0.154652	-0.510195	-	-	-	-	-
Paternal-restricted A compartments	8	18040000	18060000	-0.507327	0.273238	-0.780565	-	-	-	-	-
Paternal-restricted A compartments	8	24040000	24060000	-0.342416	0.222887	-0.565303	-	-	-	-	-
Paternal-restricted A compartments	8	24140000	24160000	-0.207303	0.129697	-0.337	-	-	-	-	-
Paternal-restricted A compartments	8	24660000	24680000	-0.212828	0.14788	-0.360708	-	-	-	-	-
Paternal-restricted A compartments	8	25320000	25340000	-0.365579	0.121138	-0.486718	-	-	-	-	-
Paternal-restricted A compartments	8	25480000	25500000	-0.393139	0.15532	-0.548459	-	-	-	-	-
Paternal-restricted A compartments	8	25980000	26000000	-0.462026	0.202641	-0.664666	-	-	-	-	-
Paternal-restricted A compartments	8	26620000	26640000	-0.223576	0.177479	-0.401055	-	-	-	-	-
Paternal-restricted A compartments	8	27260000	27280000	-0.296852	0.162218	-0.45907	-	-	-	-	-
Paternal-restricted A compartments	8	28600000	28620000	-0.350669	0.187787	-0.538455	-	-	-	-	-
Paternal-restricted A compartments	8	34860000	34880000	-0.541438	0.204714	-0.746151	-	-	-	-	-
Paternal-restricted A compartments	8	41180000	41200000	-0.243079	0.285103	-0.528182	-	-	-	-	-
Paternal-restricted A compartments	8	42660000	42680000	-0.625188	0.275188	-0.900376	-	-	-	-	-
Paternal-restricted A compartments	8	43140000	43160000	-0.310287	0.412786	-0.723073	-	-	-	-	-
Paternal-restricted A compartments	8	43180000	43200000	-0.130189	0.674908	-0.805098	-	-	-	-	-
Paternal-restricted A compartments	8	43200000	43220000	-0.261717	0.314555	-0.576272	-	-	-	-	-
Paternal-restricted A compartments	8	44240000	44260000	-0.342512	0.180066	-0.522579	-	-	-	-	-
Paternal-restricted A compartments	8	45200000	45220000	-0.180486	0.249029	-0.429515	-	-	-	-	-
Paternal-restricted A compartments	8	46180000	46200000	-0.041764	0.293942	-0.335706	-	-	-	-	-
Paternal-restricted A compartments	8	46240000	46260000	-0.29096	0.322372	-0.613331	-	-	-	-	-
Paternal-restricted A compartments	8	46340000	46360000	-0.240416	0.345904	-0.58632	-	-	-	-	-
Paternal-restricted A compartments	8	46440000	46460000	-0.216655	0.278368	-0.495024	-	-	-	-	-
Paternal-restricted A compartments	8	46680000	46700000	-0.108261	0.253737	-0.361998	-	-	-	-	-
Paternal-restricted A compartments	8	46740000	46760000	-0.186565	0.331007	-0.517572	-	-	-	-	-
Paternal-restricted A compartments	8	46780000	46800000	-0.119056	0.358513	-0.477569	-	-	-	-	-
Paternal-restricted A compartments	8	46820000	46840000	-0.0777524	0.414272	-0.492025	-	-	-	-	-
Paternal-restricted A compartments	8	47240000	47260000	-0.273003	0.255915	-0.528918	-	-	-	-	-
Paternal-restricted A compartments	8	48580000	48600000	-0.407914	0.247519	-0.655433	-	-	-	-	-
Paternal-restricted A compartments	8	48620000	48640000	-0.402392	0.174317	-0.576709	-	-	-	-	-
Paternal-restricted A compartments	8	50000000	50020000	-0.502879	0.377175	-0.880054	-	-	-	-	-
Paternal-restricted A compartments	8	50140000	50160000	-0.517793	0.484935	-1.00273	-	-	-	-	-
Paternal-restricted A compartments	8	50340000	50360000	-0.369933	0.276659	-0.646592	-	-	-	-	-
Paternal-restricted A compartments	8	50600000	50620000	-0.29724	0.369433	-0.666673	-	-	-	-	-
Paternal-restricted A compartments	8	50660000	50680000	-0.351941	0.223966	-0.575907	-	-	-	-	-
Paternal-restricted A compartments	8	50800000	50820000	-0.281154	0.426054	-0.707208	-	-	-	-	-
Paternal-restricted A compartments	8	50920000	50940000	-0.256633	0.281879	-0.538512	-	-	-	-	-
Paternal-restricted A compartments	8	50940000	50960000	-0.38101	0.307056	-0.688066	-	-	-	-	-
Paternal-restricted A compartments	8	51020000	51040000	-0.385067	0.204341	-0.589408	-	-	-	-	-
Paternal-restricted A compartments	8	51160000	51180000	-0.877051	0.130566	-1.00762	-	-	-	-	-
Paternal-restricted A compartments	8	51600000	51620000	-0.480921	0.353476	-0.834398	-	-	-	-	-
Paternal-restricted A compartments	8	51620000	51640000	-0.413184	0.387576	-0.80076	-	-	-	-	-
Paternal-restricted A compartments	8	51660000	51680000	-0.310057	0.654804	-0.964861	-	-	-	-	-
Paternal-restricted A compartments	8	51800000	51820000	-0.261238	0.492322	-0.75356	-	-	-	-	-
Paternal-restricted A compartments	8	51840000	51860000	-0.242504	0.555883	-0.798387	-	-	-	-	-
Paternal-restricted A compartments	8	51860000	51880000	-0.268164	0.734926	-1.00309	-	-	-	-	-
Paternal-restricted A compartments	8	53800000	53820000	-0.251227	0.563617	-0.814844	-	-	-	-	-
Paternal-restricted A compartments	8	107200000	107220000	-0.289141	0.233987	-0.523128	-	-	-	-	-
Paternal-restricted A compartments	8	114800000	114820000	-0.595982	0.143631	-0.739613	-	-	-	-	-
Paternal-restricted A compartments	8	117320000	117340000	-0.508413	0.340557	-0.84897	-	-	-	-	-
Paternal-restricted A compartments	8	132180000	132200000	-0.223561	0.371896	-0.595457	-	-	-	-	-
Paternal-restricted A compartments	8	133480000	133500000	-0.223642	0.119705	-0.343347	-	-	-	-	-
Paternal-restricted A compartments	8	136040000	136060000	-0.24109	0.614719	-0.855809	-	-	-	-	-
Paternal-restricted A compartments	8	136780000	136800000	-0.294707	0.34732	-0.642027	-	-	-	-	-
Paternal-restricted A compartments	8	136820000	136840000	-0.289501	0.336516	-0.626017	-	-	-	-	-
Paternal-restricted A compartments	8	137680000	137700000	-0.408058	0.230476	-0.638534	-	-	-	-	-
Paternal-restricted A compartments	8	138540000	138560000	-0.388665	0.306383	-0.695047	-	-	-	-	-
Paternal-restricted A compartments	8	138940000	138960000	-0.43817	0.690934	-1.1291	-	-	-	-	-
Paternal-restricted A compartments	9	67620000	67640000	-0.0814805	0.0773486	-0.158829	-	-	-	-	-
Paternal-restricted A compartments	9	105660000	105680000	-0.0486831	0.225603	-0.274287	-	-	-	-	-
Paternal-restricted A compartments	9	114820000	114840000	-0.193774	0.354904	-0.548678	-	-	-	-	-
Paternal-restricted A compartments	9	132440000	132460000	-0.168969	0.600151	-0.76912	-	-	-	-	-
Paternal-restricted A compartments	9	137260000	137280000	-0.369588	0.548141	-0.917729	-	-	-	-	-
Paternal-restricted A compartments	10	380000	400000	-0.247532	0.356333	-0.603866	-	-	-	-	-
Paternal-restricted A compartments	10	440000	460000	-0.418754	0.632567	-1.05132	-	-	-	-	-
Paternal-restricted A compartments	10	480000	500000	-0.493582	0.255512	-0.749094	-	-	-	-	-
Paternal-restricted A compartments	10	540000	560000	-0.490782	0.164419	-0.655201	-	-	-	-	-
Paternal-restricted A compartments	10	1760000	1780000	-0.338219	0.299804	-0.638022	-	-	-	-	-
Paternal-restricted A compartments	10	1860000	1880000	-0.655314	0.644933	-1.30025	-	-	-	-	-
Paternal-restricted A compartments	10	3320000	3340000	-0.291517	0.751034	-1.04255	-	-	-	-	-
Paternal-restricted A compartments	10	3360000	3380000	-0.399361	0.570567	-0.969928	-	-	-	-	-
Paternal-restricted A compartments	10	3500000	3520000	-0.592063	0.387608	-0.979672	-	-	-	-	-
Paternal-restricted A compartments	10	3520000	3540000	-0.713806	0.312766	-1.02657	-	-	-	-	-
Paternal-restricted A compartments	10	3660000	3680000	-1.03058	0.317515	-1.3481	-	-	-	-	-
Paternal-restricted A compartments	10	4760000	4780000	-0.783093	0.348781	-1.13187	-	-	-	-	-
Paternal-restricted A compartments	10	5380000	5400000	-0.903411	0.773874	-1.67728	-	-	-	-	-
Paternal-restricted A compartments	10	5460000	5480000	-0.790754	0.706329	-1.49708	-	-	-	-	-
Paternal-restricted A compartments	10	6120000	6140000	-0.351695	1.0273	-1.379	-	-	-	-	-
Paternal-restricted A compartments	10	6300000	6320000	-0.377902	0.529797	-0.9077	-	-	-	-	-
Paternal-restricted A compartments	10	6380000	6400000	-0.300161	0.522603	-0.822764	-	-	-	-	-
Paternal-restricted A compartments	10	6440000	6460000	-0.703639	0.597759	-1.3014	-	-	-	-	-
Paternal-restricted A compartments	10	6460000	6480000	-0.467878	0.27594	-0.743818	-	-	-	-	-
Paternal-restricted A compartments	10	6520000	6540000	-0.75944	0.515453	-1.27489	-	-	-	-	-
Paternal-restricted A compartments	10	6840000	6860000	-0.22216	0.52869	-0.75085	-	-	-	-	-
Paternal-restricted A compartments	10	7180000	7200000	-0.205313	0.579697	-0.78501	-	-	-	-	-
Paternal-restricted A compartments	10	7200000	7220000	-0.213252	0.514473	-0.727725	-	-	-	-	-
Paternal-restricted A compartments	11	11900000	11920000	-0.0884214	0.351053	-0.439474	-	-	-	-	-
Paternal-restricted A compartments	11	25980000	26000000	-0.342453	0.225755	-0.568207	-	-	-	-	-
Paternal-restricted A compartments	11	38760000	38780000	-0.243296	0.0688417	-0.312138	-	-	-	-	-
Paternal-restricted A compartments	11	38840000	38860000	-0.139402	0.276324	-0.415726	-	-	-	-	-
Paternal-restricted A compartments	11	45980000	46000000	-0.111384	0.256569	-0.367954	-	-	-	-	-
Paternal-restricted A compartments	11	64100000	64120000	-0.257401	0.254914	-0.512315	-	-	-	-	-
Paternal-restricted A compartments	11	74380000	74400000	-0.247654	0.127892	-0.375546	-	-	-	-	-
Paternal-restricted A compartments	12	17820000	17840000	-0.333096	0.375759	-0.708855	-	-	-	-	-
Paternal-restricted A compartments	12	25160000	25180000	-0.139295	0.296787	-0.436082	-	-	-	-	-
Paternal-restricted A compartments	12	41180000	41200000	-0.134997	0.1184	-0.253397	-	-	-	-	-
Paternal-restricted A compartments	12	54000000	54020000	-0.249647	0.122688	-0.372335	-	-	-	-	-
Paternal-restricted A compartments	13	10100000	10120000	-0.183571	0.173525	-0.357096	-	-	-	-	-
Paternal-restricted A compartments	13	10180000	10200000	-0.0999658	0.157847	-0.257813	-	-	-	-	-
Paternal-restricted A compartments	13	11340000	11360000	-0.277141	0.112348	-0.389488	ENSSSCG00000036033	THRB	29.46	28.78	0.51
Paternal-restricted A compartments	13	13860000	13880000	-0.0716836	0.270329	-0.342013	-	-	-	-	-
Paternal-restricted A compartments	13	36180000	36200000	-0.512519	0.0693386	-0.581857	-	-	-	-	-
Paternal-restricted A compartments	13	36280000	36300000	-0.257802	0.287808	-0.545609	-	-	-	-	-
Paternal-restricted A compartments	13	36340000	36360000	-0.303501	0.241494	-0.544995	-	-	-	-	-
Paternal-restricted A compartments	13	43620000	43640000	-0.0974933	0.273635	-0.371128	-	-	-	-	-
Paternal-restricted A compartments	13	43820000	43840000	-0.158805	0.0729186	-0.231723	-	-	-	-	-
Paternal-restricted A compartments	13	65280000	65300000	-0.129478	0.110239	-0.239717	-	-	-	-	-
Paternal-restricted A compartments	13	76140000	76160000	-0.1467	0.309833	-0.456533	-	-	-	-	-
Paternal-restricted A compartments	13	83660000	83680000	-0.144552	0.109892	-0.254444	-	-	-	-	-
Paternal-restricted A compartments	13	84320000	84340000	-0.0914067	0.150956	-0.242363	-	-	-	-	-
Paternal-restricted A compartments	13	84640000	84660000	-0.0654514	0.126152	-0.191604	-	-	-	-	-
Paternal-restricted A compartments	13	95620000	95640000	-0.128401	0.145036	-0.273437	-	-	-	-	-
Paternal-restricted A compartments	13	111200000	111220000	-0.0182393	0.209947	-0.228187	-	-	-	-	-
Paternal-restricted A compartments	13	120540000	120560000	-0.133494	0.457007	-0.590501	-	-	-	-	-
Paternal-restricted A compartments	13	120560000	120580000	-0.262348	0.334274	-0.596622	-	-	-	-	-
Paternal-restricted A compartments	13	125420000	125440000	-0.0326281	0.108919	-0.141547	-	-	-	-	-
Paternal-restricted A compartments	13	126240000	126260000	-0.236283	0.0650596	-0.301343	-	-	-	-	-
Paternal-restricted A compartments	13	138600000	138620000	-0.196629	0.106937	-0.303566	-	-	-	-	-
Paternal-restricted A compartments	13	141860000	141880000	-0.473255	0.120994	-0.594249	-	-	-	-	-
Paternal-restricted A compartments	13	142040000	142060000	-0.526891	0.0678111	-0.594702	-	-	-	-	-
Paternal-restricted A compartments	13	142320000	142340000	-0.0423869	0.160958	-0.203345	-	-	-	-	-
Paternal-restricted A compartments	13	142380000	142400000	-0.197133	0.337215	-0.534349	-	-	-	-	-
Paternal-restricted A compartments	13	143060000	143080000	-0.399323	0.229057	-0.628381	-	-	-	-	-
Paternal-restricted A compartments	13	143100000	143120000	-0.264897	0.0941492	-0.359047	-	-	-	-	-
Paternal-restricted A compartments	13	143140000	143160000	-0.176491	0.331383	-0.507875	-	-	-	-	-
Paternal-restricted A compartments	13	151560000	151580000	-0.144364	0.159876	-0.30424	-	-	-	-	-
Paternal-restricted A compartments	13	151780000	151800000	-0.105547	0.0840974	-0.189645	-	-	-	-	-
Paternal-restricted A compartments	13	157700000	157720000	-0.144559	0.224055	-0.368614	-	-	-	-	-
Paternal-restricted A compartments	13	185260000	185280000	-0.376987	0.293951	-0.670938	-	-	-	-	-
Paternal-restricted A compartments	14	7480000	7500000	-0.0670318	0.499015	-0.566047	-	-	-	-	-
Paternal-restricted A compartments	14	13120000	13140000	-0.119151	0.208377	-0.327528	-	-	-	-	-
Paternal-restricted A compartments	14	33620000	33640000	-0.240015	0.360448	-0.600462	-	-	-	-	-
Paternal-restricted A compartments	14	38060000	38080000	-0.117311	0.542613	-0.659925	-	-	-	-	-
Paternal-restricted A compartments	14	54860000	54880000	-0.285118	0.221421	-0.506539	-	-	-	-	-
Paternal-restricted A compartments	14	54880000	54900000	-0.136897	0.12397	-0.260868	-	-	-	-	-
Paternal-restricted A compartments	14	56900000	56920000	-0.2828	0.0803345	-0.363135	-	-	-	-	-
Paternal-restricted A compartments	14	61380000	61400000	-0.136186	0.188631	-0.324817	-	-	-	-	-
Paternal-restricted A compartments	14	79800000	79820000	-0.145485	0.191793	-0.337279	-	-	-	-	-
Paternal-restricted A compartments	14	80000000	80020000	-0.0491302	0.221012	-0.270143	-	-	-	-	-
Paternal-restricted A compartments	14	87720000	87740000	-0.152575	0.32541	-0.477985	-	-	-	-	-
Paternal-restricted A compartments	14	99320000	99340000	-0.18525	0.106971	-0.292221	-	-	-	-	-
Paternal-restricted A compartments	14	103640000	103660000	-0.177157	0.0943396	-0.271496	-	-	-	-	-
Paternal-restricted A compartments	14	107200000	107220000	-0.224949	0.174142	-0.399091	-	-	-	-	-
Paternal-restricted A compartments	14	111140000	111160000	-0.127988	0.357947	-0.485935	-	-	-	-	-
Paternal-restricted A compartments	14	123680000	123700000	-0.385112	0.0552781	-0.44039	-	-	-	-	-
Paternal-restricted A compartments	15	3680000	3700000	-0.121866	0.319993	-0.441858	-	-	-	-	-
Paternal-restricted A compartments	15	3900000	3920000	-0.0994835	0.260392	-0.359876	-	-	-	-	-
Paternal-restricted A compartments	15	6180000	6200000	-0.232153	0.220568	-0.452721	-	-	-	-	-
Paternal-restricted A compartments	15	7140000	7160000	-0.21614	0.17281	-0.38895	-	-	-	-	-
Paternal-restricted A compartments	15	18040000	18060000	-0.17232	0.130586	-0.302907	-	-	-	-	-
Paternal-restricted A compartments	15	18180000	18200000	-0.0663256	0.352741	-0.419067	-	-	-	-	-
Paternal-restricted A compartments	15	19880000	19900000	-0.142018	0.170134	-0.312152	-	-	-	-	-
Paternal-restricted A compartments	15	24420000	24440000	-0.0719765	0.360882	-0.432858	-	-	-	-	-
Paternal-restricted A compartments	15	67840000	67860000	-0.237763	0.175983	-0.413746	-	-	-	-	-
Paternal-restricted A compartments	15	70360000	70380000	-0.268351	0.127638	-0.395988	-	-	-	-	-
Paternal-restricted A compartments	15	74720000	74740000	-0.296309	0.145366	-0.441675	-	-	-	-	-
Paternal-restricted A compartments	15	76460000	76480000	-0.297999	0.0985161	-0.396515	-	-	-	-	-
Paternal-restricted A compartments	15	83440000	83460000	-0.123002	0.183643	-0.306645	-	-	-	-	-
Paternal-restricted A compartments	15	86580000	86600000	-0.0708889	0.10092	-0.171809	-	-	-	-	-
Paternal-restricted A compartments	15	92220000	92240000	-0.184023	0.276874	-0.460898	-	-	-	-	-
Paternal-restricted A compartments	15	100000000	100020000	-0.128058	0.27219	-0.400248	-	-	-	-	-
Paternal-restricted A compartments	15	100500000	100520000	-0.109419	0.178418	-0.287836	-	-	-	-	-
Paternal-restricted A compartments	15	105180000	105200000	-0.311188	0.119099	-0.430287	-	-	-	-	-
Paternal-restricted A compartments	15	118240000	118260000	-0.155933	0.275312	-0.431245	-	-	-	-	-
Paternal-restricted A compartments	15	130420000	130440000	-0.212985	0.207752	-0.420737	-	-	-	-	-
Paternal-restricted A compartments	15	130500000	130520000	-0.216455	0.116486	-0.332941	-	-	-	-	-
Paternal-restricted A compartments	16	4320000	4340000	-0.179863	0.184839	-0.364703	-	-	-	-	-
Paternal-restricted A compartments	16	4400000	4420000	-0.25141	0.159218	-0.410628	-	-	-	-	-
Paternal-restricted A compartments	16	7160000	7180000	-0.190266	0.218033	-0.408299	-	-	-	-	-
Paternal-restricted A compartments	16	22720000	22740000	-0.0495391	0.182551	-0.23209	-	-	-	-	-
Paternal-restricted A compartments	16	23520000	23540000	-0.161139	0.210594	-0.371733	-	-	-	-	-
Paternal-restricted A compartments	16	23660000	23680000	-0.176916	0.261179	-0.438094	-	-	-	-	-
Paternal-restricted A compartments	16	23700000	23720000	-0.398936	0.212279	-0.611215	-	-	-	-	-
Paternal-restricted A compartments	16	27320000	27340000	-0.328419	0.157282	-0.485701	-	-	-	-	-
Paternal-restricted A compartments	16	36960000	36980000	-0.0937996	0.144361	-0.238161	-	-	-	-	-
Paternal-restricted A compartments	16	36980000	37000000	-0.144432	0.23627	-0.380702	-	-	-	-	-
Paternal-restricted A compartments	16	38700000	38720000	-0.101214	0.0987796	-0.199993	-	-	-	-	-
Paternal-restricted A compartments	16	39520000	39540000	-0.120161	0.110987	-0.231148	-	-	-	-	-
Paternal-restricted A compartments	16	41140000	41160000	-0.11124	0.0390796	-0.150319	-	-	-	-	-
Paternal-restricted A compartments	16	47020000	47040000	-0.0456225	0.216189	-0.261812	-	-	-	-	-
Paternal-restricted A compartments	16	48240000	48260000	-0.344369	0.227167	-0.571536	-	-	-	-	-
Paternal-restricted A compartments	16	48880000	48900000	-0.27992	0.0644131	-0.344333	-	-	-	-	-
Paternal-restricted A compartments	16	48900000	48920000	-0.354861	0.119174	-0.474035	-	-	-	-	-
Paternal-restricted A compartments	16	49600000	49620000	-0.247243	0.0849099	-0.332153	-	-	-	-	-
Paternal-restricted A compartments	16	54780000	54800000	-0.0719368	0.176473	-0.24841	-	-	-	-	-
Paternal-restricted A compartments	16	78140000	78160000	-0.207358	0.225295	-0.432652	-	-	-	-	-
Paternal-restricted A compartments	16	78200000	78220000	-0.2096	0.132958	-0.342558	-	-	-	-	-
Paternal-restricted A compartments	17	13960000	13980000	-0.836558	0.16785	-1.00441	-	-	-	-	-
Paternal-restricted A compartments	17	14120000	14140000	-0.568689	0.213812	-0.782501	-	-	-	-	-
Paternal-restricted A compartments	17	26480000	26500000	-0.151622	0.173035	-0.324657	-	-	-	-	-
Paternal-restricted A compartments	17	52960000	52980000	-0.136221	0.264763	-0.400984	-	-	-	-	-
Paternal-restricted A compartments	18	2220000	2240000	-0.337405	0.390217	-0.727622	-	-	-	-	-
Paternal-restricted A compartments	18	13680000	13700000	-0.284461	0.241861	-0.526322	-	-	-	-	-
Paternal-restricted A compartments	18	38000000	38020000	-0.125568	0.18274	-0.308307	-	-	-	-	-
Paternal-restricted A compartments	18	45720000	45740000	-0.153419	0.257609	-0.411028	-	-	-	-	-
Paternal-restricted A compartments	18	46880000	46900000	-0.102188	0.216689	-0.318877	-	-	-	-	-
Paternal-restricted A compartments	18	48360000	48380000	-0.130234	0.169738	-0.299971	-	-	-	-	-
Paternal-restricted A compartments	18	55180000	55200000	-0.0986488	0.200044	-0.298693	-	-	-	-	-
More active compartments in paternal	1	8980000	9000000	3.9974	4.52073	-0.523339	-	-	-	-	-
More active compartments in paternal	1	21420000	21440000	0.688965	1.27583	-0.586868	-	-	-	-	-
More active compartments in paternal	1	92520000	92540000	-1.28931	-0.754204	-0.535106	-	-	-	-	-
More active compartments in paternal	1	92660000	92680000	-2.1946	-1.58926	-0.605343	-	-	-	-	-
More active compartments in paternal	1	93080000	93100000	-4.04969	-3.53894	-0.510747	-	-	-	-	-
More active compartments in paternal	1	93100000	93120000	-4.40636	-3.71614	-0.690215	-	-	-	-	-
More active compartments in paternal	1	93260000	93280000	-3.87521	-3.25237	-0.622839	-	-	-	-	-
More active compartments in paternal	1	138680000	138700000	0.658263	1.20644	-0.548178	-	-	-	-	-
More active compartments in paternal	1	138740000	138760000	0.924535	1.4656	-0.541063	-	-	-	-	-
More active compartments in paternal	1	139200000	139220000	1.42643	1.92763	-0.501195	-	-	-	-	-
More active compartments in paternal	1	139600000	139620000	1.6351	2.36842	-0.733319	-	-	-	-	-
More active compartments in paternal	1	140260000	140280000	-2.24727	-1.55442	-0.69285	-	-	-	-	-
More active compartments in paternal	1	140300000	140320000	-2.10707	-1.46742	-0.63964	-	-	-	-	-
More active compartments in paternal	1	140500000	140520000	-1.76873	-1.21412	-0.554607	-	-	-	-	-
More active compartments in paternal	1	140800000	140820000	-2.01816	-1.38704	-0.631128	-	-	-	-	-
More active compartments in paternal	1	140900000	140920000	-2.11016	-1.51064	-0.599522	-	-	-	-	-
More active compartments in paternal	1	140980000	141000000	-2.50687	-1.83333	-0.673547	-	-	-	-	-
More active compartments in paternal	1	141000000	141020000	-2.30081	-1.7462	-0.554606	-	-	-	-	-
More active compartments in paternal	1	141200000	141220000	-1.13623	-0.50227	-0.633965	-	-	-	-	-
More active compartments in paternal	1	141900000	141920000	2.09976	2.88672	-0.786961	-	-	-	-	-
More active compartments in paternal	1	141940000	141960000	2.04661	3.02417	-0.977559	-	-	-	-	-
More active compartments in paternal	1	142160000	142180000	-3.89443	-2.99144	-0.902988	-	-	-	-	-
More active compartments in paternal	1	142180000	142200000	-3.92579	-2.61427	-1.31152	-	-	-	-	-
More active compartments in paternal	1	142220000	142240000	-3.59981	-1.59027	-2.00954	-	-	-	-	-
More active compartments in paternal	1	142280000	142300000	-3.42395	-0.877332	-2.54662	-	-	-	-	-
More active compartments in paternal	1	142300000	142320000	-3.6968	-1.4615	-2.2353	-	-	-	-	-
More active compartments in paternal	1	142320000	142340000	-3.64527	-1.4208	-2.22447	-	-	-	-	-
More active compartments in paternal	1	142340000	142360000	-3.51844	-1.27148	-2.24696	-	-	-	-	-
More active compartments in paternal	1	142360000	142380000	-3.55538	-1.41181	-2.14357	-	-	-	-	-
More active compartments in paternal	1	142380000	142400000	-3.72967	-1.32627	-2.4034	-	-	-	-	-
More active compartments in paternal	1	142400000	142420000	-3.38993	-0.849962	-2.53997	-	-	-	-	-
More active compartments in paternal	1	142420000	142440000	-3.48969	-0.755579	-2.73411	-	-	-	-	-
More active compartments in paternal	1	142580000	142600000	-3.14558	-1.44219	-1.7034	-	-	-	-	-
More active compartments in paternal	1	142600000	142620000	-3.36309	-2.44339	-0.919704	-	-	-	-	-
More active compartments in paternal	1	142620000	142640000	-3.48024	-2.38167	-1.09857	-	-	-	-	-
More active compartments in paternal	1	142640000	142660000	-3.65967	-2.6483	-1.01137	-	-	-	-	-
More active compartments in paternal	1	142660000	142680000	-3.52735	-2.63263	-0.894723	-	-	-	-	-
More active compartments in paternal	1	142680000	142700000	-3.44664	-2.52266	-0.923978	-	-	-	-	-
More active compartments in paternal	1	142700000	142720000	-3.16234	-2.00303	-1.15931	-	-	-	-	-
More active compartments in paternal	1	142720000	142740000	-3.2239	-2.14566	-1.07824	-	-	-	-	-
More active compartments in paternal	1	142740000	142760000	-3.11935	-2.19322	-0.926129	-	-	-	-	-
More active compartments in paternal	1	142760000	142780000	-3.31658	-2.30516	-1.01142	-	-	-	-	-
More active compartments in paternal	1	142780000	142800000	-3.35792	-2.27823	-1.07968	-	-	-	-	-
More active compartments in paternal	1	142800000	142820000	-3.22878	-2.15186	-1.07693	-	-	-	-	-
More active compartments in paternal	1	142840000	142860000	-3.11819	-2.20537	-0.91282	-	-	-	-	-
More active compartments in paternal	1	142860000	142880000	-3.03927	-2.14363	-0.895634	-	-	-	-	-
More active compartments in paternal	1	142880000	142900000	-3.01915	-2.03171	-0.987436	-	-	-	-	-
More active compartments in paternal	1	142900000	142920000	-2.93529	-1.80913	-1.12616	-	-	-	-	-
More active compartments in paternal	1	142920000	142940000	-2.47574	-1.54247	-0.933276	-	-	-	-	-
More active compartments in paternal	1	142960000	142980000	-3.1717	-2.21509	-0.956617	-	-	-	-	-
More active compartments in paternal	1	143000000	143020000	-3.06654	-2.15652	-0.910017	-	-	-	-	-
More active compartments in paternal	1	143040000	143060000	-2.42609	-1.62582	-0.800273	-	-	-	-	-
More active compartments in paternal	1	143060000	143080000	-2.01256	-1.5035	-0.509057	-	-	-	-	-
More active compartments in paternal	1	143080000	143100000	-1.58333	-0.851306	-0.73202	-	-	-	-	-
More active compartments in paternal	1	143160000	143180000	-1.45489	-0.836148	-0.618746	-	-	-	-	-
More active compartments in paternal	1	143320000	143340000	-1.04817	-0.532827	-0.515345	-	-	-	-	-
More active compartments in paternal	1	243740000	243760000	-3.36403	-2.82902	-0.53501	-	-	-	-	-
More active compartments in paternal	1	245660000	245680000	-2.81898	-2.24356	-0.575419	-	-	-	-	-
More active compartments in paternal	1	263580000	263600000	-4.65584	-4.08572	-0.570117	-	-	-	-	-
More active compartments in paternal	1	263660000	263680000	-3.52335	-2.59064	-0.93271	-	-	-	-	-
More active compartments in paternal	1	267640000	267660000	3.78445	4.31919	-0.534739	-	-	-	-	-
More active compartments in paternal	2	460000	480000	5.00889	5.54279	-0.5339	-	-	-	-	-
More active compartments in paternal	2	800000	820000	4.53599	5.30756	-0.771573	-	-	-	-	-
More active compartments in paternal	2	11200000	11220000	-4.57571	-3.917	-0.658709	-	-	-	-	-
More active compartments in paternal	2	16660000	16680000	4.63963	5.27921	-0.639574	-	-	-	-	-
More active compartments in paternal	2	17220000	17240000	3.74153	4.28664	-0.545108	-	-	-	-	-
More active compartments in paternal	2	57640000	57660000	-3.69473	-3.01379	-0.680933	-	-	-	-	-
More active compartments in paternal	2	65260000	65280000	3.95978	4.50718	-0.547401	-	-	-	-	-
More active compartments in paternal	2	66340000	66360000	1.28748	1.94946	-0.661982	-	-	-	-	-
More active compartments in paternal	2	70300000	70320000	-2.31142	-1.73915	-0.572271	-	-	-	-	-
More active compartments in paternal	2	70320000	70340000	-2.62944	-1.81915	-0.810289	-	-	-	-	-
More active compartments in paternal	2	70340000	70360000	-2.47235	-1.5049	-0.967449	-	-	-	-	-
More active compartments in paternal	2	70380000	70400000	-2.58013	-1.59659	-0.983544	-	-	-	-	-
More active compartments in paternal	2	70400000	70420000	-2.52391	-1.55016	-0.973745	-	-	-	-	-
More active compartments in paternal	2	70420000	70440000	-2.31762	-1.72793	-0.589693	-	-	-	-	-
More active compartments in paternal	2	142320000	142340000	6.21198	6.80384	-0.591857	-	-	-	-	-
More active compartments in paternal	2	142360000	142380000	5.85519	6.56657	-0.711386	-	-	-	-	-
More active compartments in paternal	2	143160000	143180000	2.04847	2.6456	-0.59713	-	-	-	-	-
More active compartments in paternal	2	146560000	146580000	-4.52357	-3.96288	-0.560691	-	-	-	-	-
More active compartments in paternal	2	150400000	150420000	3.84944	4.39506	-0.545622	-	-	-	-	-
More active compartments in paternal	2	150900000	150920000	7.59146	8.15645	-0.564989	-	-	-	-	-
More active compartments in paternal	3	126080000	126100000	3.57657	4.16439	-0.587822	-	-	-	-	-
More active compartments in paternal	3	127300000	127320000	2.62725	3.13965	-0.512405	-	-	-	-	-
More active compartments in paternal	4	61300000	61320000	-3.47234	-2.89862	-0.573719	-	-	-	-	-
More active compartments in paternal	4	120080000	120100000	-2.10005	-1.59602	-0.504028	-	-	-	-	-
More active compartments in paternal	4	120480000	120500000	-2.14557	-1.46592	-0.679645	-	-	-	-	-
More active compartments in paternal	4	121480000	121500000	-2.91236	-2.38678	-0.525571	-	-	-	-	-
More active compartments in paternal	4	130380000	130400000	0.637603	1.15658	-0.51898	-	-	-	-	-
More active compartments in paternal	5	18180000	18200000	2.53868	3.05302	-0.51434	-	-	-	-	-
More active compartments in paternal	5	40200000	40220000	-3.80233	-3.05265	-0.749684	-	-	-	-	-
More active compartments in paternal	5	40220000	40240000	-3.65675	-3.02822	-0.628531	-	-	-	-	-
More active compartments in paternal	5	99360000	99380000	-2.94267	-2.26501	-0.677664	-	-	-	-	-
More active compartments in paternal	5	100440000	100460000	-2.93482	-2.43149	-0.503333	-	-	-	-	-
More active compartments in paternal	5	102640000	102660000	-2.71891	-1.91886	-0.800054	-	-	-	-	-
More active compartments in paternal	5	103340000	103360000	0.758338	1.38835	-0.630011	-	-	-	-	-
More active compartments in paternal	6	3020000	3040000	5.1554	5.71832	-0.562925	-	-	-	-	-
More active compartments in paternal	6	14320000	14340000	1.64305	2.18314	-0.540088	-	-	-	-	-
More active compartments in paternal	6	17760000	17780000	2.76054	3.27885	-0.518313	-	-	-	-	-
More active compartments in paternal	6	44220000	44240000	4.02806	4.62959	-0.601529	-	-	-	-	-
More active compartments in paternal	6	56100000	56120000	2.0259	2.58108	-0.555183	-	-	-	-	-
More active compartments in paternal	6	56120000	56140000	2.20946	2.72932	-0.51986	-	-	-	-	-
More active compartments in paternal	6	60940000	60960000	1.5297	2.03005	-0.500344	-	-	-	-	-
More active compartments in paternal	6	61300000	61320000	1.35251	2.35651	-1.004	-	-	-	-	-
More active compartments in paternal	6	61320000	61340000	0.800524	1.86664	-1.06612	-	-	-	-	-
More active compartments in paternal	6	61360000	61380000	1.07698	2.12797	-1.05098	-	-	-	-	-
More active compartments in paternal	6	61380000	61400000	1.35777	2.25863	-0.900853	-	-	-	-	-
More active compartments in paternal	6	61400000	61420000	1.68073	2.47871	-0.797977	-	-	-	-	-
More active compartments in paternal	6	61520000	61540000	1.17625	1.72121	-0.544961	-	-	-	-	-
More active compartments in paternal	6	61840000	61860000	2.08924	2.62841	-0.539172	-	-	-	-	-
More active compartments in paternal	6	62180000	62200000	2.02729	2.59201	-0.564711	-	-	-	-	-
More active compartments in paternal	7	21880000	21900000	-3.88798	-3.14486	-0.74312	-	-	-	-	-
More active compartments in paternal	7	79140000	79160000	-5.79008	-4.68848	-1.10161	-	-	-	-	-
More active compartments in paternal	7	79800000	79820000	-6.08388	-5.43231	-0.651571	-	-	-	-	-
More active compartments in paternal	7	79820000	79840000	-5.70491	-5.10039	-0.604515	-	-	-	-	-
More active compartments in paternal	7	97540000	97560000	3.46705	4.02525	-0.558192	-	-	-	-	-
More active compartments in paternal	8	121480000	121500000	0.822025	1.32904	-0.507013	-	-	-	-	-
More active compartments in paternal	9	14660000	14680000	-2.87991	-2.33204	-0.547868	-	-	-	-	-
More active compartments in paternal	9	14800000	14820000	-2.88194	-2.19257	-0.689362	-	-	-	-	-
More active compartments in paternal	9	74360000	74380000	-1.80719	-1.14893	-0.658257	-	-	-	-	-
More active compartments in paternal	9	74380000	74400000	-2.05171	-1.17857	-0.873138	-	-	-	-	-
More active compartments in paternal	9	74400000	74420000	-1.95371	-0.843357	-1.11035	-	-	-	-	-
More active compartments in paternal	9	74420000	74440000	-2.24986	-0.882327	-1.36754	-	-	-	-	-
More active compartments in paternal	9	74440000	74460000	-2.1161	-0.754047	-1.36205	-	-	-	-	-
More active compartments in paternal	9	74460000	74480000	-1.78197	-0.183437	-1.59853	ENSSSCG00000015328;ENSSSCG00000036049	SGCE;PEG10	-;0.1	-;180.69	0
More active compartments in paternal	9	74480000	74500000	-2.38866	-1.15479	-1.23387	-	-	-	-	-
More active compartments in paternal	9	74500000	74520000	-2.58423	-1.88536	-0.698865	-	-	-	-	-
More active compartments in paternal	9	123300000	123320000	1.2405	1.80075	-0.560256	-	-	-	-	-
More active compartments in paternal	10	13000000	13020000	0.724378	1.32565	-0.601269	-	-	-	-	-
More active compartments in paternal	10	13880000	13900000	1.97719	2.6083	-0.631106	-	-	-	-	-
More active compartments in paternal	10	13980000	14000000	1.94988	2.86065	-0.910765	-	-	-	-	-
More active compartments in paternal	10	14000000	14020000	1.78603	2.86852	-1.08249	-	-	-	-	-
More active compartments in paternal	10	14020000	14040000	2.38924	2.89873	-0.509495	-	-	-	-	-
More active compartments in paternal	10	14120000	14140000	2.31099	2.90839	-0.597402	-	-	-	-	-
More active compartments in paternal	10	34380000	34400000	-3.99179	-3.42709	-0.564709	-	-	-	-	-
More active compartments in paternal	10	62500000	62520000	-3.93401	-3.16091	-0.773098	-	-	-	-	-
More active compartments in paternal	10	68820000	68840000	2.07986	2.60001	-0.520152	-	-	-	-	-
More active compartments in paternal	10	69100000	69120000	1.96977	2.64915	-0.679381	-	-	-	-	-
More active compartments in paternal	11	2460000	2480000	2.05163	2.58458	-0.532947	-	-	-	-	-
More active compartments in paternal	11	25700000	25720000	2.08768	3.08462	-0.99694	-	-	-	-	-
More active compartments in paternal	11	70400000	70420000	-1.68096	-1.17898	-0.501984	-	-	-	-	-
More active compartments in paternal	12	7920000	7940000	-1.52873	-0.957745	-0.570986	-	-	-	-	-
More active compartments in paternal	13	1900000	1920000	-2.23584	-1.69577	-0.540067	-	-	-	-	-
More active compartments in paternal	13	2180000	2200000	-2.57485	-2.0393	-0.535546	-	-	-	-	-
More active compartments in paternal	13	8300000	8320000	-1.4197	-0.914051	-0.50565	-	-	-	-	-
More active compartments in paternal	14	91200000	91220000	-2.69929	-2.18767	-0.511618	-	-	-	-	-
More active compartments in paternal	14	108620000	108640000	0.734214	1.25387	-0.519654	-	-	-	-	-
More active compartments in paternal	14	129680000	129700000	1.3665	1.89266	-0.526156	-	-	-	-	-
More active compartments in paternal	14	132760000	132780000	0.376008	0.889881	-0.513874	-	-	-	-	-
More active compartments in paternal	15	23880000	23900000	-1.1876	-0.614418	-0.573179	-	-	-	-	-
More active compartments in paternal	15	118500000	118520000	-0.996598	-0.343249	-0.653349	-	-	-	-	-
More active compartments in paternal	15	131420000	131440000	1.64319	2.1775	-0.534306	-	-	-	-	-
More active compartments in paternal	16	65620000	65640000	0.278601	0.781426	-0.502825	-	-	-	-	-
More active compartments in paternal	16	68660000	68680000	1.19199	1.70242	-0.510428	-	-	-	-	-
More active compartments in paternal	17	45980000	46000000	-2.216	-1.51654	-0.699463	-	-	-	-	-
More active compartments in paternal	17	53940000	53960000	-3.46393	-2.76462	-0.699311	-	-	-	-	-
More active compartments in paternal	17	54440000	54460000	-1.82259	-1.27313	-0.549461	-	-	-	-	-

## Sheet: Readme
SupplementaryTable 2. Characteristics of A/B switched and A/B variable regions between parent-of-origin in the three tissues.
Sheet 1: Summary of A/B switched and A/B variable regions between parent-of-origin, including accumulative lengths, A-B index differences and the number of imprinted genes.
Sheet 2: Detailed information of each 20-kb bin of A/B switched and A/B variable regions between parent-of-origin in the liver tissue, including chromosomal locations and allelic differences in A-B index and expression.
Sheet 3: Detailed information of each 20-kb bin of A/B switched and A/B variable regions between parent-of-origin in the skeletal muscle tissue, including chromosomal locations and allelic differences in A-B index and expression.
Sheet 4: Detailed information of each 20-kb bin of A/B switched and A/B variable regions between parent-of-origin in the brain tissue, including chromosomal locations and allelic differences in A-B index and expression.
