# Supplementary material for: Haplotype-resolved 3D chromatin architecture of the hybrid pig
Source: HighWire-hosted journal article supplement (doi:10.1101/gr.278101.123), 2024-02-01
Supplement: Supplemental_Table_S3.xlsx [file Supplemental_Table_S3.xlsx]

## Sheet: Sheet 1 (Summary)
Tissue	Type of differential compartments between breeds		Accumulative lengths (Mb)	% of the genome (autosomes only)	Mean A-B index in Berkshire allele	Mean A-B index in Tibetan allele	ΔA-B index (Berkshire – Tibetan)	Number of genes
Liver	A/B switches	Berkshire-specific A compartments	8.42	0.37	0.37	-0.37	0.74	63
		Tibetan-specific A compartments	10.44	0.46	-0.42	0.42	-0.84	92
	A/B variables	More active compartments in Berkshire allele	25.24	1.11	-2.08	-2.78	0.7	167
		More active compartments in Tibetan allele	36.18	1.6	-2.95	-2.17	-0.78	196
Muscle	A/B switches	Berkshire-specific A compartments	4.94	0.22	0.4	-0.33	0.73	34
		Tibetan-specific A compartments	7.58	0.33	-0.39	0.39	-0.78	45
	A/B variables	More active compartments in Berkshire allele	10.78	0.48	-0.54	-1.23	0.69	82
		More active compartments in Tibetan allele	18.52	0.82	-2.14	-1.46	-0.68	115
Brain	A/B switches	Berkshire-specific A compartments	7.26	0.32	0.25	-0.25	0.5	54
		Tibetan-specific A compartments	9.94	0.44	-0.31	0.29	-0.6	67
	A/B variables	More active compartments in Berkshire allele	4.66	0.21	0.16	-0.51	0.67	45
		More active compartments in Tibetan allele	10.14	0.45	-1.56	-0.85	-0.71	85

## Sheet: Sheet 2 (Liver)
Differential compartments between breeds	Chromosome	Start	End	Mean A-B index of Berkshire	Mean A-B index of Tibetan	ΔA-B index (Berkshire – Tibetan)	Identity score	Gene Ensembl ID	Gene symbol	Berkshire TPM	Tibetan TPM	Allelic expression ratio of Berkshire
Berkshire-specific A compartments	1	5140000	5160000	0.539341	-0.260376	0.799717	0.993181	-	-	-	-	-
Berkshire-specific A compartments	1	5480000	5500000	0.355269	-0.266404	0.621674	0.992034	-	-	-	-	-
Berkshire-specific A compartments	1	5580000	5600000	0.582671	-0.595377	1.17805	0.98915	-	-	-	-	-
Berkshire-specific A compartments	1	11540000	11560000	0.288369	-0.443876	0.732245	0.990894	-	-	-	-	-
Berkshire-specific A compartments	1	44460000	44480000	0.167937	-0.473046	0.640983	0.99358	-	-	-	-	-
Berkshire-specific A compartments	1	64420000	64440000	0.277758	-0.560308	0.838066	0.994366	-	-	-	-	-
Berkshire-specific A compartments	1	67540000	67560000	0.323762	-0.225801	0.549563	0.995852	-	-	-	-	-
Berkshire-specific A compartments	1	70960000	70980000	0.308117	-0.186036	0.494152	0.994318	-	-	-	-	-
Berkshire-specific A compartments	1	85880000	85900000	0.199018	-0.523928	0.722947	0.996921	-	-	-	-	-
Berkshire-specific A compartments	1	110400000	110420000	0.250628	-0.230098	0.480726	0.994884	-	-	-	-	-
Berkshire-specific A compartments	1	110600000	110620000	0.292674	-0.294309	0.586982	0.992703	-	-	-	-	-
Berkshire-specific A compartments	1	118860000	118880000	0.182431	-0.256979	0.43941	0.997231	-	-	-	-	-
Berkshire-specific A compartments	1	133280000	133300000	0.494576	-0.201862	0.696438	0.994858	-	-	-	-	-
Berkshire-specific A compartments	1	134080000	134100000	0.255385	-0.219248	0.474633	0.998167	-	-	-	-	-
Berkshire-specific A compartments	1	134340000	134360000	0.213337	-0.225387	0.438723	0.997068	-	-	-	-	-
Berkshire-specific A compartments	1	157880000	157900000	0.319319	-0.234441	0.55376	0.997287	ENSSSCG00000004890	SERPINB2	0.111011	0.111011	-
Berkshire-specific A compartments	1	187220000	187240000	0.324558	-0.102027	0.426584	0.996124	-	-	-	-	-
Berkshire-specific A compartments	1	193900000	193920000	0.166723	-0.290944	0.457667	0.996154	-	-	-	-	-
Berkshire-specific A compartments	1	215080000	215100000	0.269828	-0.369279	0.639107	0.996425	-	-	-	-	-
Berkshire-specific A compartments	2	27420000	27440000	0.360387	-0.587492	0.947878	0.99793	-	-	-	-	-
Berkshire-specific A compartments	2	39020000	39040000	0.330068	-0.446404	0.776472	0.985478	ENSSSCG00000013347	PRMT3	7.96175	7.65907	0.509688
Berkshire-specific A compartments	2	47860000	47880000	0.347416	-0.306128	0.653544	0.996771	ENSSSCG00000013403	GALNT18	0.773808	0.54223	0.587983
Berkshire-specific A compartments	2	47880000	47900000	0.441487	-0.408275	0.849762	0.996125	-	-	-	-	-
Berkshire-specific A compartments	2	49720000	49740000	0.391739	-0.237864	0.629603	0.990849	-	-	-	-	-
Berkshire-specific A compartments	2	65420000	65440000	0.367307	-0.745694	1.113	0.997027	-	-	-	-	-
Berkshire-specific A compartments	2	70300000	70320000	0.600177	-0.303248	0.903425	0.995859	-	-	-	-	-
Berkshire-specific A compartments	2	70320000	70340000	0.373621	-0.480266	0.853887	0.997733	-	-	-	-	-
Berkshire-specific A compartments	2	70360000	70380000	0.449777	-0.72013	1.16991	0.998903	-	-	-	-	-
Berkshire-specific A compartments	2	70400000	70420000	0.321988	-0.575943	0.897932	0.998504	-	-	-	-	-
Berkshire-specific A compartments	2	70440000	70460000	0.514594	-0.476046	0.99064	0.997488	-	-	-	-	-
Berkshire-specific A compartments	2	70460000	70480000	0.548516	-0.359016	0.907532	0.995108	-	-	-	-	-
Berkshire-specific A compartments	2	119800000	119820000	0.321867	-0.417072	0.738939	0.995877	ENSSSCG00000038156	TMED7	267.595	242.414	0.524687
Berkshire-specific A compartments	2	123120000	123140000	0.287205	-0.337621	0.624825	0.994534	-	-	-	-	-
Berkshire-specific A compartments	2	127920000	127940000	0.16059	-0.299679	0.46027	0.989343	-	-	-	-	-
Berkshire-specific A compartments	2	127940000	127960000	0.163142	-0.414389	0.577531	0.991069	-	-	-	-	-
Berkshire-specific A compartments	2	128180000	128200000	0.411358	-0.185124	0.596483	0.990404	-	-	-	-	-
Berkshire-specific A compartments	2	128260000	128280000	0.435893	-0.394107	0.83	0.988314	-	-	-	-	-
Berkshire-specific A compartments	2	128300000	128320000	0.296841	-0.285652	0.582493	0.990588	-	-	-	-	-
Berkshire-specific A compartments	2	139840000	139860000	0.304237	-0.463418	0.767656	0.996247	-	-	-	-	-
Berkshire-specific A compartments	3	13920000	13940000	0.359283	-0.113945	0.473228	0.994406	-	-	-	-	-
Berkshire-specific A compartments	3	14060000	14080000	0.309119	-0.214001	0.523119	0.991194	-	-	-	-	-
Berkshire-specific A compartments	3	27320000	27340000	0.194953	-0.275234	0.470186	0.990367	-	-	-	-	-
Berkshire-specific A compartments	3	27360000	27380000	0.265078	-0.157728	0.422806	0.988293	-	-	-	-	-
Berkshire-specific A compartments	3	27420000	27440000	0.240914	-0.213105	0.454019	0.993703	-	-	-	-	-
Berkshire-specific A compartments	3	52240000	52260000	0.2556	-0.217488	0.473088	0.991433	-	-	-	-	-
Berkshire-specific A compartments	3	57280000	57300000	0.373571	-1.02446	1.39803	0.992908	-	-	-	-	-
Berkshire-specific A compartments	3	57300000	57320000	0.452083	-0.705682	1.15776	0.991598	-	-	-	-	-
Berkshire-specific A compartments	3	57600000	57620000	0.466453	-0.445343	0.911796	0.986336	-	-	-	-	-
Berkshire-specific A compartments	3	57640000	57660000	0.444121	-0.387418	0.831539	0.991841	-	-	-	-	-
Berkshire-specific A compartments	3	60120000	60140000	0.307213	-0.267725	0.574937	0.986193	-	-	-	-	-
Berkshire-specific A compartments	3	73140000	73160000	0.237941	-0.316862	0.554803	0.990498	-	-	-	-	-
Berkshire-specific A compartments	3	73180000	73200000	0.141553	-0.308497	0.450051	0.988586	-	-	-	-	-
Berkshire-specific A compartments	3	73220000	73240000	0.218388	-0.248696	0.467084	0.988065	-	-	-	-	-
Berkshire-specific A compartments	3	73300000	73320000	0.123726	-0.376234	0.49996	0.988663	-	-	-	-	-
Berkshire-specific A compartments	3	73340000	73360000	0.0750594	-0.510494	0.585554	0.987655	-	-	-	-	-
Berkshire-specific A compartments	3	73360000	73380000	0.211265	-0.497748	0.709013	0.98455	-	-	-	-	-
Berkshire-specific A compartments	3	73380000	73400000	0.386844	-0.212759	0.599604	0.99108	ENSSSCG00000008340	ANTXR1	5.81865	6.6677	0.466001
Berkshire-specific A compartments	3	73400000	73420000	0.471867	-0.354634	0.826501	0.987686	-	-	-	-	-
Berkshire-specific A compartments	3	73420000	73440000	0.431761	-0.159089	0.59085	0.993295	ENSSSCG00000035529	GKN1	0	0	-
Berkshire-specific A compartments	3	75560000	75580000	0.0972892	-0.279471	0.37676	0.990901	-	-	-	-	-
Berkshire-specific A compartments	3	78340000	78360000	0.285561	-0.13069	0.41625	0.994184	-	-	-	-	-
Berkshire-specific A compartments	3	78360000	78380000	0.2343	-0.27596	0.510261	0.990493	-	-	-	-	-
Berkshire-specific A compartments	3	81000000	81020000	0.121349	-0.337249	0.458598	0.994547	-	-	-	-	-
Berkshire-specific A compartments	3	93100000	93120000	0.266074	-0.183087	0.449162	0.993094	-	-	-	-	-
Berkshire-specific A compartments	3	94980000	95000000	0.224053	-0.464126	0.688179	0.993729	ENSSSCG00000047564	Unknown	0.552253	0.636109	0.464718
Berkshire-specific A compartments	3	95060000	95080000	0.220847	-0.588571	0.809418	0.995097	-	-	-	-	-
Berkshire-specific A compartments	3	96060000	96080000	0.357501	-0.42597	0.783471	0.993886	-	-	-	-	-
Berkshire-specific A compartments	3	108820000	108840000	0.634951	-0.211141	0.846091	0.995195	-	-	-	-	-
Berkshire-specific A compartments	3	108840000	108860000	0.498514	-0.39188	0.890394	0.997019	-	-	-	-	-
Berkshire-specific A compartments	3	108880000	108900000	0.400119	-0.378326	0.778445	0.992107	ENSSSCG00000025901	LCLAT1	23.974	12.7082	0.65356
Berkshire-specific A compartments	3	109180000	109200000	0.158644	-0.303032	0.461676	0.99005	ENSSSCG00000008529	YPEL5	28.937	26.5593	0.521422
Berkshire-specific A compartments	3	117580000	117600000	0.216156	-0.386914	0.60307	0.98621	ENSSSCG00000028931	GDF7	0.0349261	0.0349261	-
Berkshire-specific A compartments	3	121800000	121820000	0.28484	-0.197204	0.482044	0.989758	-	-	-	-	-
Berkshire-specific A compartments	4	8820000	8840000	0.530713	-0.509737	1.04045	0.98249	-	-	-	-	-
Berkshire-specific A compartments	4	8840000	8860000	0.632391	-0.470073	1.10246	0.982214	-	-	-	-	-
Berkshire-specific A compartments	4	8860000	8880000	0.424108	-0.497415	0.921523	0.982411	-	-	-	-	-
Berkshire-specific A compartments	4	8880000	8900000	0.410267	-0.395106	0.805374	0.985079	-	-	-	-	-
Berkshire-specific A compartments	4	8900000	8920000	0.494308	-0.394281	0.88859	0.986558	-	-	-	-	-
Berkshire-specific A compartments	4	8940000	8960000	0.363907	-0.654097	1.018	0.983694	-	-	-	-	-
Berkshire-specific A compartments	4	8960000	8980000	0.353335	-0.512913	0.866248	0.98275	-	-	-	-	-
Berkshire-specific A compartments	4	9000000	9020000	0.428753	-0.557656	0.986409	0.981538	ENSSSCG00000005954	AC100868.1	0.0141626	0.0240103	-
Berkshire-specific A compartments	4	11060000	11080000	0.404336	-0.265598	0.669934	0.993692	-	-	-	-	-
Berkshire-specific A compartments	4	11160000	11180000	0.470881	-0.26696	0.737841	0.990474	-	-	-	-	-
Berkshire-specific A compartments	4	11200000	11220000	0.498865	-0.377804	0.876669	0.989376	-	-	-	-	-
Berkshire-specific A compartments	4	11220000	11240000	0.407239	-0.409469	0.816708	0.98559	-	-	-	-	-
Berkshire-specific A compartments	4	11240000	11260000	0.42007	-0.351682	0.771752	0.989108	-	-	-	-	-
Berkshire-specific A compartments	4	11260000	11280000	0.507192	-0.363912	0.871104	0.987827	-	-	-	-	-
Berkshire-specific A compartments	4	11280000	11300000	0.40123	-0.243776	0.645006	0.989063	-	-	-	-	-
Berkshire-specific A compartments	4	11320000	11340000	0.523032	-0.199786	0.722818	0.984511	-	-	-	-	-
Berkshire-specific A compartments	4	13380000	13400000	0.310471	-0.251613	0.562083	0.98878	-	-	-	-	-
Berkshire-specific A compartments	4	30820000	30840000	0.426254	-0.332581	0.758835	0.990313	-	-	-	-	-
Berkshire-specific A compartments	4	55360000	55380000	0.188297	-0.709857	0.898153	0.989767	-	-	-	-	-
Berkshire-specific A compartments	4	56580000	56600000	0.153818	-0.206542	0.360361	0.988009	-	-	-	-	-
Berkshire-specific A compartments	4	67420000	67440000	0.132141	-0.427723	0.559864	0.994107	-	-	-	-	-
Berkshire-specific A compartments	4	69680000	69700000	0.246834	-0.174271	0.421105	0.996576	-	-	-	-	-
Berkshire-specific A compartments	4	70880000	70900000	0.482066	-0.217066	0.699132	0.996058	-	-	-	-	-
Berkshire-specific A compartments	4	101180000	101200000	0.838923	-0.545888	1.38481	0.99915	-	-	-	-	-
Berkshire-specific A compartments	4	101440000	101460000	0.42575	-0.314298	0.740048	0.99521	-	-	-	-	-
Berkshire-specific A compartments	4	120980000	121000000	0.334356	-0.308871	0.643227	0.997379	-	-	-	-	-
Berkshire-specific A compartments	5	11980000	12000000	1.00029	-0.411372	1.41166	0.999136	-	-	-	-	-
Berkshire-specific A compartments	5	32800000	32820000	0.313274	-0.300943	0.614216	0.99409	-	-	-	-	-
Berkshire-specific A compartments	5	33880000	33900000	0.192829	-0.384024	0.576852	0.993745	ENSSSCG00000036760	LRRC10	0	0	-
Berkshire-specific A compartments	5	64840000	64860000	0.401446	-0.416677	0.818123	0.985657	-	-	-	-	-
Berkshire-specific A compartments	5	64900000	64920000	0.385433	-0.502673	0.888105	0.98372	-	-	-	-	-
Berkshire-specific A compartments	5	65360000	65380000	0.269465	-0.487072	0.756536	0.985169	-	-	-	-	-
Berkshire-specific A compartments	5	65480000	65500000	0.3905	-0.449278	0.839779	0.984182	-	-	-	-	-
Berkshire-specific A compartments	5	82240000	82260000	0.28457	-0.385285	0.669855	0.993347	-	-	-	-	-
Berkshire-specific A compartments	5	87280000	87300000	0.257253	-0.282883	0.540136	0.996104	-	-	-	-	-
Berkshire-specific A compartments	5	103800000	103820000	0.304924	-0.521036	0.82596	0.996256	-	-	-	-	-
Berkshire-specific A compartments	5	103900000	103920000	0.38742	-0.478529	0.86595	0.993752	-	-	-	-	-
Berkshire-specific A compartments	5	104040000	104060000	0.219029	-0.407528	0.626557	0.994972	-	-	-	-	-
Berkshire-specific A compartments	6	6200000	6220000	0.4407	-0.4055	0.8462	0.996352	-	-	-	-	-
Berkshire-specific A compartments	6	9680000	9700000	0.48421	-0.188365	0.672575	0.989767	-	-	-	-	-
Berkshire-specific A compartments	6	18360000	18380000	0.868252	-0.51096	1.37921	0.987538	-	-	-	-	-
Berkshire-specific A compartments	6	31300000	31320000	0.0965344	-0.281543	0.378078	0.99493	-	-	-	-	-
Berkshire-specific A compartments	6	31400000	31420000	0.154113	-0.142439	0.296552	0.98898	-	-	-	-	-
Berkshire-specific A compartments	6	34940000	34960000	0.297182	-0.298978	0.59616	0.986245	-	-	-	-	-
Berkshire-specific A compartments	6	35040000	35060000	0.133252	-0.447543	0.580794	0.989784	-	-	-	-	-
Berkshire-specific A compartments	6	40100000	40120000	0.541737	-0.18056	0.722297	0.991751	-	-	-	-	-
Berkshire-specific A compartments	6	97580000	97600000	0.247695	-0.27131	0.519005	0.991754	-	-	-	-	-
Berkshire-specific A compartments	6	97600000	97620000	0.325393	-0.264933	0.590326	0.991425	-	-	-	-	-
Berkshire-specific A compartments	6	97660000	97680000	0.374425	-0.304746	0.679171	0.994276	-	-	-	-	-
Berkshire-specific A compartments	6	153220000	153240000	0.177911	-0.375835	0.553747	0.989995	-	-	-	-	-
Berkshire-specific A compartments	6	155920000	155940000	0.103576	-0.21427	0.317847	0.987305	-	-	-	-	-
Berkshire-specific A compartments	7	16720000	16740000	0.18407	-0.359759	0.543828	0.987997	-	-	-	-	-
Berkshire-specific A compartments	7	35420000	35440000	0.545337	-0.40607	0.951407	0.991656	-	-	-	-	-
Berkshire-specific A compartments	7	41680000	41700000	0.182692	-0.210449	0.393141	0.984536	-	-	-	-	-
Berkshire-specific A compartments	7	49820000	49840000	0.478935	-0.183696	0.66263	0.996013	ENSSSCG00000037209	TLNRD1	3.38967	3.10695	0.521759
Berkshire-specific A compartments	7	60140000	60160000	0.313074	-0.258215	0.57129	0.997751	-	-	-	-	-
Berkshire-specific A compartments	7	61060000	61080000	0.195786	-0.39861	0.594396	0.992295	-	-	-	-	-
Berkshire-specific A compartments	7	87920000	87940000	0.146671	-0.291629	0.438299	0.997196	-	-	-	-	-
Berkshire-specific A compartments	7	95380000	95400000	0.213024	-0.627853	0.840877	0.989243	ENSSSCG00000033093	RGS6	0.426544	0.805694	0.346154
Berkshire-specific A compartments	7	95500000	95520000	0.496523	-0.281116	0.777639	0.985986	-	-	-	-	-
Berkshire-specific A compartments	7	95540000	95560000	0.365599	-0.556048	0.921646	0.987669	-	-	-	-	-
Berkshire-specific A compartments	7	110960000	110980000	0.105293	-0.355912	0.461205	0.984125	-	-	-	-	-
Berkshire-specific A compartments	7	111000000	111020000	0.217782	-0.243436	0.461218	0.990861	-	-	-	-	-
Berkshire-specific A compartments	7	111040000	111060000	0.325982	-0.197436	0.523418	0.98842	-	-	-	-	-
Berkshire-specific A compartments	7	111580000	111600000	0.25357	-0.318251	0.571821	0.983323	-	-	-	-	-
Berkshire-specific A compartments	7	111720000	111740000	0.244233	-0.355302	0.599534	0.992585	-	-	-	-	-
Berkshire-specific A compartments	7	117440000	117460000	0.596886	-0.589735	1.18662	0.979292	-	-	-	-	-
Berkshire-specific A compartments	8	11600000	11620000	0.490178	-0.243601	0.733779	0.983714	-	-	-	-	-
Berkshire-specific A compartments	8	11620000	11640000	0.384046	-0.286401	0.670448	0.982948	-	-	-	-	-
Berkshire-specific A compartments	8	11820000	11840000	0.521378	-0.228252	0.74963	0.984856	-	-	-	-	-
Berkshire-specific A compartments	8	11860000	11880000	0.353291	-0.439464	0.792755	0.986451	-	-	-	-	-
Berkshire-specific A compartments	8	11940000	11960000	0.0929476	-0.654467	0.747415	0.98946	-	-	-	-	-
Berkshire-specific A compartments	8	12280000	12300000	0.220606	-0.567007	0.787613	0.987722	-	-	-	-	-
Berkshire-specific A compartments	8	12320000	12340000	0.388278	-0.30995	0.698228	0.988807	-	-	-	-	-
Berkshire-specific A compartments	8	37420000	37440000	0.226687	-0.209361	0.436048	0.9888	-	-	-	-	-
Berkshire-specific A compartments	8	41840000	41860000	0.263566	-0.328471	0.592037	0.995463	ENSSSCG00000008844	KDR	79.6687	78.0258	0.505209
Berkshire-specific A compartments	8	66240000	66260000	0.301115	-0.194642	0.495757	0.999869	-	-	-	-	-
Berkshire-specific A compartments	8	66280000	66300000	0.270626	-0.428015	0.698641	0.999936	ENSSSCG00000040980	Unknown	170.686	1843.41	0.0847458
Berkshire-specific A compartments	8	66320000	66340000	0.25523	-0.41976	0.674991	0.996649	ENSSSCG00000039276	UGT2B31	692.824	867.899	0.443912
Berkshire-specific A compartments	8	66480000	66500000	0.557948	-0.305193	0.863141	0.999431	ENSSSCG00000031919	Unknown	54.6022	5.41632	0.909756
Berkshire-specific A compartments	8	68500000	68520000	0.436437	-0.301928	0.738365	0.99916	-	-	-	-	-
Berkshire-specific A compartments	8	68520000	68540000	0.53881	-0.23829	0.7771	0.994912	-	-	-	-	-
Berkshire-specific A compartments	8	68560000	68580000	0.424613	-0.229365	0.653977	0.994366	ENSSSCG00000008944	NPFFR2	0.828397	0.548224	0.601761
Berkshire-specific A compartments	8	68580000	68600000	0.507435	-0.185298	0.692732	0.994244	-	-	-	-	-
Berkshire-specific A compartments	8	78880000	78900000	0.483477	-0.456354	0.939831	0.990744	-	-	-	-	-
Berkshire-specific A compartments	8	78900000	78920000	0.426988	-0.483783	0.910771	0.987961	ENSSSCG00000035623	IQCM	0.0650703	0.0650703	-
Berkshire-specific A compartments	8	80260000	80280000	0.156482	-0.368542	0.525024	0.994684	-	-	-	-	-
Berkshire-specific A compartments	8	83560000	83580000	0.390034	-0.316524	0.706558	0.998539	-	-	-	-	-
Berkshire-specific A compartments	8	83580000	83600000	0.337856	-0.143481	0.481337	0.996864	-	-	-	-	-
Berkshire-specific A compartments	8	83660000	83680000	0.690712	-0.109745	0.800457	0.997843	ENSSSCG00000009045	HHIP	39.2216	37.4285	0.511697
Berkshire-specific A compartments	8	88340000	88360000	0.481683	-0.601877	1.08356	0.995762	-	-	-	-	-
Berkshire-specific A compartments	8	88360000	88380000	0.405874	-0.450019	0.855894	0.993133	-	-	-	-	-
Berkshire-specific A compartments	8	88380000	88400000	0.370947	-0.399664	0.770611	0.989192	-	-	-	-	-
Berkshire-specific A compartments	8	88400000	88420000	0.56085	-0.405472	0.966323	0.990474	-	-	-	-	-
Berkshire-specific A compartments	8	88460000	88480000	0.564329	-0.116326	0.680655	0.993059	-	-	-	-	-
Berkshire-specific A compartments	8	88660000	88680000	0.408465	-0.318852	0.727317	0.994261	-	-	-	-	-
Berkshire-specific A compartments	8	97140000	97160000	0.471553	-0.353176	0.82473	0.995878	-	-	-	-	-
Berkshire-specific A compartments	8	97160000	97180000	0.360434	-0.277958	0.638391	0.996216	-	-	-	-	-
Berkshire-specific A compartments	8	97200000	97220000	0.493092	-0.171654	0.664746	0.997018	ENSSSCG00000009079	INTU	2.0486	2.34816	0.465935
Berkshire-specific A compartments	8	100080000	100100000	0.252927	-0.219609	0.472535	0.993009	-	-	-	-	-
Berkshire-specific A compartments	8	101440000	101460000	0.349858	-0.30533	0.655187	0.997903	-	-	-	-	-
Berkshire-specific A compartments	8	101720000	101740000	0.388893	-0.275333	0.664226	0.994497	-	-	-	-	-
Berkshire-specific A compartments	8	101960000	101980000	0.354499	-0.353704	0.708203	0.993231	-	-	-	-	-
Berkshire-specific A compartments	8	102180000	102200000	0.335709	-0.264325	0.600033	0.989009	-	-	-	-	-
Berkshire-specific A compartments	8	102980000	103000000	0.325076	-0.36528	0.690356	0.994902	ENSSSCG00000029260	NDNF	0.598834	0.491442	0.54925
Berkshire-specific A compartments	8	109320000	109340000	0.236939	-0.763719	1.00066	0.995894	-	-	-	-	-
Berkshire-specific A compartments	8	111740000	111760000	0.2278	-0.170271	0.398071	0.992593	ENSSSCG00000036236	ELOVL6	52.13	77.8084	0.40119
Berkshire-specific A compartments	8	115700000	115720000	0.420334	-0.287146	0.70748	0.990285	-	-	-	-	-
Berkshire-specific A compartments	8	115720000	115740000	0.190654	-0.454596	0.645249	0.989746	-	-	-	-	-
Berkshire-specific A compartments	8	115740000	115760000	0.138221	-0.652464	0.790685	0.977515	-	-	-	-	-
Berkshire-specific A compartments	8	128860000	128880000	0.337074	-1.18487	1.52194	0.98433	-	-	-	-	-
Berkshire-specific A compartments	8	128900000	128920000	0.245213	-0.975675	1.22089	0.990417	-	-	-	-	-
Berkshire-specific A compartments	8	128920000	128940000	0.370708	-0.887721	1.25843	0.990655	-	-	-	-	-
Berkshire-specific A compartments	8	128940000	128960000	0.53457	-0.865078	1.39965	0.989559	ENSSSCG00000022986	CCSER1	5.60818	3.9578	0.586263
Berkshire-specific A compartments	8	132260000	132280000	0.497126	-0.305881	0.803006	0.985315	-	-	-	-	-
Berkshire-specific A compartments	8	132340000	132360000	0.291874	-0.591193	0.883067	0.989275	-	-	-	-	-
Berkshire-specific A compartments	9	11840000	11860000	0.42109	-0.50343	0.92452	0.995798	-	-	-	-	-
Berkshire-specific A compartments	9	13140000	13160000	0.37424	-0.196815	0.571055	0.982748	-	-	-	-	-
Berkshire-specific A compartments	9	13160000	13180000	0.448845	-0.212784	0.661629	0.987573	-	-	-	-	-
Berkshire-specific A compartments	9	13180000	13200000	0.197064	-0.217828	0.414892	0.988502	-	-	-	-	-
Berkshire-specific A compartments	9	13520000	13540000	0.25977	-0.190449	0.450219	0.991351	-	-	-	-	-
Berkshire-specific A compartments	9	13540000	13560000	0.243641	-0.207486	0.451126	0.985357	-	-	-	-	-
Berkshire-specific A compartments	9	40920000	40940000	0.184502	-0.211904	0.396406	0.988412	-	-	-	-	-
Berkshire-specific A compartments	9	52440000	52460000	0.618624	-0.140706	0.75933	0.998865	-	-	-	-	-
Berkshire-specific A compartments	9	52960000	52980000	0.750265	-0.457924	1.20819	0.998267	-	-	-	-	-
Berkshire-specific A compartments	9	60700000	60720000	0.2771	-0.318589	0.595689	0.997451	-	-	-	-	-
Berkshire-specific A compartments	9	63780000	63800000	0.285102	-0.163594	0.448696	0.997151	-	-	-	-	-
Berkshire-specific A compartments	9	63800000	63820000	0.299774	-0.188756	0.48853	0.997529	ENSSSCG00000015267;ENSSSCG00000015268	FMO2;FMO1	0.101568172208333;714.867406488886	0.507840861041667;873.169162454449	0.166666666666666;0.450158025620627
Berkshire-specific A compartments	9	73860000	73880000	0.133389	-0.44541	0.578799	0.997803	-	-	-	-	-
Berkshire-specific A compartments	9	76660000	76680000	0.163819	-0.121164	0.284983	0.997439	-	-	-	-	-
Berkshire-specific A compartments	9	77360000	77380000	0.286698	-0.218742	0.50544	0.99743	-	-	-	-	-
Berkshire-specific A compartments	9	77380000	77400000	0.301374	-0.360424	0.661798	0.997133	-	-	-	-	-
Berkshire-specific A compartments	9	80700000	80720000	0.387039	-0.180471	0.56751	0.996844	-	-	-	-	-
Berkshire-specific A compartments	9	92700000	92720000	0.149599	-0.271162	0.420761	0.994242	ENSSSCG00000032456	ABCB1	1.61326	4.79917	0.251583
Berkshire-specific A compartments	9	102180000	102200000	0.175964	-0.41272	0.588683	0.991644	ENSSSCG00000045565	Unknown	0.948909	0.947752	0.500305
Berkshire-specific A compartments	9	103400000	103420000	0.139216	-0.382325	0.521541	0.985824	-	-	-	-	-
Berkshire-specific A compartments	9	117340000	117360000	0.242451	-0.166042	0.408493	0.988116	-	-	-	-	-
Berkshire-specific A compartments	9	117740000	117760000	0.22961	-0.386601	0.616211	0.994417	-	-	-	-	-
Berkshire-specific A compartments	9	118160000	118180000	0.278123	-0.0957172	0.37384	0.995955	-	-	-	-	-
Berkshire-specific A compartments	9	131960000	131980000	0.155882	-0.581657	0.737539	0.984743	ENSSSCG00000040650	AC092017.2	0.133456	0.133456	-
Berkshire-specific A compartments	9	132580000	132600000	0.167963	-0.539175	0.707138	0.9851	-	-	-	-	-
Berkshire-specific A compartments	10	10260000	10280000	0.970318	-0.69425	1.66457	0.991882	ENSSSCG00000032644	HLX	2.34993	2.45502	0.489064
Berkshire-specific A compartments	10	10440000	10460000	0.456351	-0.627998	1.08435	0.988149	-	-	-	-	-
Berkshire-specific A compartments	10	10500000	10520000	0.558497	-0.893018	1.45152	0.990718	-	-	-	-	-
Berkshire-specific A compartments	10	10760000	10780000	0.367884	-0.83207	1.19995	0.991104	-	-	-	-	-
Berkshire-specific A compartments	10	10800000	10820000	0.481647	-0.698198	1.17985	0.98859	-	-	-	-	-
Berkshire-specific A compartments	10	10820000	10840000	0.88418	-0.471542	1.35572	0.986579	-	-	-	-	-
Berkshire-specific A compartments	10	10860000	10880000	0.911069	-0.407467	1.31854	0.993253	-	-	-	-	-
Berkshire-specific A compartments	10	10980000	11000000	0.817185	-0.46914	1.28633	0.985273	-	-	-	-	-
Berkshire-specific A compartments	10	11000000	11020000	0.932187	-0.467822	1.40001	0.984982	-	-	-	-	-
Berkshire-specific A compartments	10	11040000	11060000	1.01101	-0.43421	1.44522	0.99003	-	-	-	-	-
Berkshire-specific A compartments	10	11080000	11100000	0.693818	-0.56263	1.25645	0.98229	-	-	-	-	-
Berkshire-specific A compartments	10	11120000	11140000	0.634742	-0.792069	1.42681	0.979518	-	-	-	-	-
Berkshire-specific A compartments	10	11220000	11240000	0.750811	-0.638146	1.38896	0.984751	-	-	-	-	-
Berkshire-specific A compartments	10	11260000	11280000	0.949297	-0.687178	1.63647	0.983723	-	-	-	-	-
Berkshire-specific A compartments	10	24000000	24020000	0.744081	-0.637451	1.38153	0.989457	-	-	-	-	-
Berkshire-specific A compartments	11	19900000	19920000	0.396074	-0.196945	0.593018	0.98271	-	-	-	-	-
Berkshire-specific A compartments	11	19920000	19940000	0.261331	-0.452098	0.713429	0.985134	-	-	-	-	-
Berkshire-specific A compartments	11	32380000	32400000	0.222344	-0.311693	0.534037	0.996189	-	-	-	-	-
Berkshire-specific A compartments	11	43900000	43920000	0.264624	-0.217947	0.482572	0.995799	-	-	-	-	-
Berkshire-specific A compartments	11	51800000	51820000	0.366269	-0.0496754	0.415944	0.991032	-	-	-	-	-
Berkshire-specific A compartments	11	64960000	64980000	0.526217	-0.682435	1.20865	0.991103	-	-	-	-	-
Berkshire-specific A compartments	12	12060000	12080000	0.270675	-0.408239	0.678913	0.981977	-	-	-	-	-
Berkshire-specific A compartments	12	13200000	13220000	0.118749	-0.481406	0.600155	0.987377	-	-	-	-	-
Berkshire-specific A compartments	12	13220000	13240000	0.202753	-0.396146	0.598899	0.98548	-	-	-	-	-
Berkshire-specific A compartments	12	13260000	13280000	0.326079	-0.256489	0.582568	0.98366	-	-	-	-	-
Berkshire-specific A compartments	12	13280000	13300000	0.414223	-0.209108	0.623332	0.990769	ENSSSCG00000036461	CACNG5	0.0145956	0.0145956	-
Berkshire-specific A compartments	12	13300000	13320000	0.307741	-0.226398	0.534139	0.983985	-	-	-	-	-
Berkshire-specific A compartments	12	13340000	13360000	0.522532	-0.198665	0.721197	0.982212	-	-	-	-	-
Berkshire-specific A compartments	12	15660000	15680000	0.121117	-0.681267	0.802385	0.995261	-	-	-	-	-
Berkshire-specific A compartments	12	16300000	16320000	0.338144	-0.300244	0.638388	0.995787	ENSSSCG00000033421	METTL2A	9.73505	8.85443	0.523686
Berkshire-specific A compartments	12	17160000	17180000	0.142787	-0.543037	0.685824	0.986401	-	-	-	-	-
Berkshire-specific A compartments	12	17520000	17540000	0.237258	-0.434327	0.671585	0.994142	-	-	-	-	-
Berkshire-specific A compartments	12	17560000	17580000	0.21122	-0.39641	0.60763	0.990822	-	-	-	-	-
Berkshire-specific A compartments	12	17580000	17600000	0.277306	-0.556047	0.833353	0.991735	-	-	-	-	-
Berkshire-specific A compartments	12	17800000	17820000	0.479372	-0.356479	0.835852	0.98889	ENSSSCG00000017320	RPRML	0.0139686	0.0139686	-
Berkshire-specific A compartments	12	17820000	17840000	0.379285	-0.701347	1.08063	0.988582	ENSSSCG00000017321	LYZL6	0	0	-
Berkshire-specific A compartments	12	17840000	17860000	0.287519	-0.658173	0.945692	0.993971	ENSSSCG00000017577	Unknown	0.170268	0.170268	-
Berkshire-specific A compartments	12	17860000	17880000	0.5563	-0.399242	0.955542	0.996794	ENSSSCG00000041162	Unknown	0.135859	0.135859	-
Berkshire-specific A compartments	12	17880000	17900000	0.757064	-0.211555	0.968618	0.998303	-	-	-	-	-
Berkshire-specific A compartments	12	17900000	17920000	0.5932	-0.58366	1.17686	0.998906	-	-	-	-	-
Berkshire-specific A compartments	12	21000000	21020000	0.571605	-0.226344	0.79795	0.982083	ENSSSCG00000017433	Unknown	0.0143149	0.0143149	-
Berkshire-specific A compartments	12	21020000	21040000	0.360872	-0.474029	0.834901	0.986802	ENSSSCG00000017448	KRT14	22.8287	18.7541	0.548994
Berkshire-specific A compartments	12	21040000	21060000	0.0604158	-0.703941	0.764357	0.9836	-	-	-	-	-
Berkshire-specific A compartments	12	21100000	21120000	0.0755118	-1.13072	1.20624	0.987072	-	-	-	-	-
Berkshire-specific A compartments	12	21720000	21740000	0.355823	-0.636116	0.991939	0.99096	ENSSSCG00000017465	KRT24	0.184255	0.165846	-
Berkshire-specific A compartments	12	21740000	21760000	0.398326	-0.561784	0.96011	0.989828	-	-	-	-	-
Berkshire-specific A compartments	13	1900000	1920000	0.892985	-0.161375	1.05436	0.996439	-	-	-	-	-
Berkshire-specific A compartments	13	1960000	1980000	0.491969	-0.216557	0.708526	0.991416	ENSSSCG00000037830	TOMM22	0	0	-
Berkshire-specific A compartments	13	1980000	2000000	0.410038	-0.249444	0.659482	0.991065	ENSSSCG00000037430	COL6A6	1.14691	0.837878	0.577851
Berkshire-specific A compartments	13	2000000	2020000	0.320811	-0.590765	0.911576	0.983918	-	-	-	-	-
Berkshire-specific A compartments	13	2020000	2040000	0.213812	-0.468669	0.682481	0.988606	-	-	-	-	-
Berkshire-specific A compartments	13	2060000	2080000	0.41981	-0.481026	0.900836	0.984899	-	-	-	-	-
Berkshire-specific A compartments	13	2080000	2100000	0.333468	-0.417315	0.750783	0.983177	-	-	-	-	-
Berkshire-specific A compartments	13	2100000	2120000	0.475925	-0.5388	1.01473	0.985563	-	-	-	-	-
Berkshire-specific A compartments	13	2120000	2140000	0.849363	-0.595561	1.44492	0.986217	-	-	-	-	-
Berkshire-specific A compartments	13	2140000	2160000	0.802992	-0.41603	1.21902	0.982818	-	-	-	-	-
Berkshire-specific A compartments	13	2160000	2180000	0.824679	-0.42861	1.25329	0.984343	ENSSSCG00000011186	COL6A5	2.05611	2.60612	0.441014
Berkshire-specific A compartments	13	2180000	2200000	0.654239	-0.427472	1.08171	0.986494	-	-	-	-	-
Berkshire-specific A compartments	13	2200000	2220000	0.520649	-0.217554	0.738203	0.99361	-	-	-	-	-
Berkshire-specific A compartments	13	2220000	2240000	0.702694	-0.210017	0.912711	0.994104	-	-	-	-	-
Berkshire-specific A compartments	13	4280000	4300000	0.701947	-0.297676	0.999623	0.987639	-	-	-	-	-
Berkshire-specific A compartments	13	7040000	7060000	0.429811	-0.433469	0.86328	0.987029	-	-	-	-	-
Berkshire-specific A compartments	13	11480000	11500000	0.487774	-0.457677	0.945451	0.9911	-	-	-	-	-
Berkshire-specific A compartments	13	11500000	11520000	0.369396	-0.36859	0.737986	0.985989	-	-	-	-	-
Berkshire-specific A compartments	13	11820000	11840000	0.333229	-0.395891	0.72912	0.991937	-	-	-	-	-
Berkshire-specific A compartments	13	14020000	14040000	0.34574	-0.403636	0.749376	0.991219	-	-	-	-	-
Berkshire-specific A compartments	13	14040000	14060000	0.457291	-0.158748	0.616039	0.992825	ENSSSCG00000011218	SLC4A7	6.48906	6.21444	0.510809
Berkshire-specific A compartments	13	16580000	16600000	0.217849	-0.229493	0.447342	0.990962	-	-	-	-	-
Berkshire-specific A compartments	13	39280000	39300000	0.145682	-0.626195	0.771877	0.998293	-	-	-	-	-
Berkshire-specific A compartments	13	39320000	39340000	0.512944	-0.279014	0.791958	0.994084	-	-	-	-	-
Berkshire-specific A compartments	13	40440000	40460000	0.328818	-0.218265	0.547083	0.986055	ENSSSCG00000042038	Unknown	0.20995	0.20995	-
Berkshire-specific A compartments	13	40740000	40760000	0.500633	-0.344989	0.845622	0.992716	-	-	-	-	-
Berkshire-specific A compartments	13	40760000	40780000	0.292575	-0.464234	0.756809	0.9922	ENSSSCG00000011482	CFAP20DC	7.20875	6.83671	0.513244
Berkshire-specific A compartments	13	41720000	41740000	0.191262	-0.544324	0.735586	0.998113	-	-	-	-	-
Berkshire-specific A compartments	13	41760000	41780000	0.30686	-0.421233	0.728093	0.99445	-	-	-	-	-
Berkshire-specific A compartments	13	41780000	41800000	0.379318	-0.32528	0.704598	0.989688	-	-	-	-	-
Berkshire-specific A compartments	13	42940000	42960000	0.349351	-0.14087	0.490221	0.99403	-	-	-	-	-
Berkshire-specific A compartments	13	44880000	44900000	0.284543	-0.330326	0.614869	0.997332	-	-	-	-	-
Berkshire-specific A compartments	13	44980000	45000000	0.339227	-0.301825	0.641053	0.992225	-	-	-	-	-
Berkshire-specific A compartments	13	45000000	45020000	0.287435	-0.405104	0.692539	0.994106	-	-	-	-	-
Berkshire-specific A compartments	13	45020000	45040000	0.235359	-0.31043	0.545788	0.98947	-	-	-	-	-
Berkshire-specific A compartments	13	50400000	50420000	0.593087	-0.240795	0.833882	0.988723	-	-	-	-	-
Berkshire-specific A compartments	13	50900000	50920000	0.670984	-0.45626	1.12724	0.993971	-	-	-	-	-
Berkshire-specific A compartments	13	50920000	50940000	0.388325	-0.853029	1.24135	0.989453	-	-	-	-	-
Berkshire-specific A compartments	13	50940000	50960000	0.454969	-0.655673	1.11064	0.984355	-	-	-	-	-
Berkshire-specific A compartments	13	50960000	50980000	0.418789	-0.527215	0.946004	0.992729	-	-	-	-	-
Berkshire-specific A compartments	13	51080000	51100000	0.3446	-0.50825	0.85285	0.992203	-	-	-	-	-
Berkshire-specific A compartments	13	51100000	51120000	0.547102	-0.197211	0.744313	0.99491	-	-	-	-	-
Berkshire-specific A compartments	13	51380000	51400000	0.295288	-0.341508	0.636796	0.995818	-	-	-	-	-
Berkshire-specific A compartments	13	52280000	52300000	0.248273	-0.199566	0.447839	0.995473	-	-	-	-	-
Berkshire-specific A compartments	13	78900000	78920000	0.368635	-0.396652	0.765287	0.998096	ENSSSCG00000027467	DZIP1L	0.811029	0.808553	0.500764
Berkshire-specific A compartments	13	80180000	80200000	0.427528	-0.379237	0.806765	0.997011	-	-	-	-	-
Berkshire-specific A compartments	13	82480000	82500000	0.390194	-0.89142	1.28161	0.996959	-	-	-	-	-
Berkshire-specific A compartments	13	117660000	117680000	0.314075	-0.688352	1.00243	0.995878	-	-	-	-	-
Berkshire-specific A compartments	13	127380000	127400000	0.140941	-0.281811	0.422751	0.992421	-	-	-	-	-
Berkshire-specific A compartments	13	127720000	127740000	0.283412	-0.231234	0.514646	0.993822	ENSSSCG00000040904	CLDN1	133.129	127.216	0.511355
Berkshire-specific A compartments	13	127740000	127760000	0.146089	-0.299957	0.446046	0.991775	-	-	-	-	-
Berkshire-specific A compartments	13	153340000	153360000	0.348061	-0.098484	0.446545	0.996706	-	-	-	-	-
Berkshire-specific A compartments	13	153360000	153380000	0.306518	-0.209535	0.516052	0.998097	-	-	-	-	-
Berkshire-specific A compartments	13	153400000	153420000	0.439428	-0.142471	0.581899	0.998442	-	-	-	-	-
Berkshire-specific A compartments	13	158460000	158480000	0.359335	-0.273899	0.633233	0.996738	-	-	-	-	-
Berkshire-specific A compartments	13	179720000	179740000	0.122554	-0.193065	0.315619	0.989115	-	-	-	-	-
Berkshire-specific A compartments	13	180760000	180780000	0.387732	-0.29069	0.678422	0.987974	-	-	-	-	-
Berkshire-specific A compartments	13	181120000	181140000	0.217114	-0.198596	0.41571	0.994547	-	-	-	-	-
Berkshire-specific A compartments	13	181380000	181400000	0.265376	-0.224812	0.490187	0.989044	-	-	-	-	-
Berkshire-specific A compartments	13	181420000	181440000	0.230686	-0.119874	0.350559	0.993011	-	-	-	-	-
Berkshire-specific A compartments	13	181460000	181480000	0.24818	-0.308485	0.556665	0.99098	-	-	-	-	-
Berkshire-specific A compartments	13	181480000	181500000	0.123863	-0.289711	0.413574	0.993841	-	-	-	-	-
Berkshire-specific A compartments	13	181500000	181520000	0.209742	-0.150769	0.360511	0.994717	-	-	-	-	-
Berkshire-specific A compartments	13	190920000	190940000	0.357248	-0.00129021	0.358538	0.999833	-	-	-	-	-
Berkshire-specific A compartments	13	191380000	191400000	0.214913	-0.102201	0.317113	0.984716	-	-	-	-	-
Berkshire-specific A compartments	14	2520000	2540000	0.381205	-0.145677	0.526882	0.996037	-	-	-	-	-
Berkshire-specific A compartments	14	10600000	10620000	0.247386	-0.245701	0.493087	0.989591	-	-	-	-	-
Berkshire-specific A compartments	14	13520000	13540000	0.161401	-0.135495	0.296896	0.992479	-	-	-	-	-
Berkshire-specific A compartments	14	35080000	35100000	0.230924	-0.318717	0.549641	0.994206	-	-	-	-	-
Berkshire-specific A compartments	14	58380000	58400000	0.157489	-0.188897	0.346386	0.986229	-	-	-	-	-
Berkshire-specific A compartments	14	61020000	61040000	0.340733	-0.56327	0.904003	0.995148	ENSSSCG00000023596	Unknown	4.16792	3.76451	0.525428
Berkshire-specific A compartments	14	61120000	61140000	0.20469	-0.334582	0.539272	0.995706	-	-	-	-	-
Berkshire-specific A compartments	14	61320000	61340000	0.253313	-0.34939	0.602702	0.990646	-	-	-	-	-
Berkshire-specific A compartments	14	61420000	61440000	0.436465	-0.294573	0.731038	0.993326	-	-	-	-	-
Berkshire-specific A compartments	14	61700000	61720000	0.111795	-0.559289	0.671084	0.996731	-	-	-	-	-
Berkshire-specific A compartments	14	64360000	64380000	0.306685	-0.443664	0.750349	0.99837	-	-	-	-	-
Berkshire-specific A compartments	14	90740000	90760000	0.29717	-0.37867	0.67584	0.996302	-	-	-	-	-
Berkshire-specific A compartments	14	100660000	100680000	0.253155	-0.0866097	0.339764	0.993698	-	-	-	-	-
Berkshire-specific A compartments	14	103120000	103140000	0.265955	-0.202849	0.468804	0.994602	-	-	-	-	-
Berkshire-specific A compartments	14	105920000	105940000	0.35074	-0.182278	0.533017	0.997831	-	-	-	-	-
Berkshire-specific A compartments	14	105940000	105960000	0.342233	-0.173391	0.515624	0.997623	-	-	-	-	-
Berkshire-specific A compartments	14	128640000	128660000	0.412539	-0.401906	0.814445	0.981782	-	-	-	-	-
Berkshire-specific A compartments	14	130560000	130580000	0.314268	-0.621243	0.935511	0.981517	-	-	-	-	-
Berkshire-specific A compartments	14	130720000	130740000	0.18493	-0.453707	0.638636	0.985293	-	-	-	-	-
Berkshire-specific A compartments	14	131200000	131220000	0.339889	-0.453862	0.793751	0.988224	-	-	-	-	-
Berkshire-specific A compartments	14	131260000	131280000	0.598073	-0.106006	0.704079	0.981253	-	-	-	-	-
Berkshire-specific A compartments	14	131340000	131360000	0.468606	-0.160662	0.629268	0.980862	-	-	-	-	-
Berkshire-specific A compartments	14	141460000	141480000	0.554146	-0.831823	1.38597	0.995507	-	-	-	-	-
Berkshire-specific A compartments	14	141480000	141500000	0.280262	-0.650847	0.931108	0.996364	-	-	-	-	-
Berkshire-specific A compartments	14	141500000	141520000	0.319367	-1.21566	1.53503	0.995866	ENSSSCG00000036429;ENSSSCG00000043141	Unknown;Unknown	0.0188390495475833;0.101564929036025	0.0188390495475833;0.101564929036025	-;-
Berkshire-specific A compartments	14	141640000	141660000	0.466873	-1.59837	2.06524	0.997523	ENSSSCG00000046090;ENSSSCG00000049424	Unknown;Unknown	0.0122364973903167;3.411307946075e-09	0.0122364973903167;3.411307946075e-09	-;-
Berkshire-specific A compartments	15	15620000	15640000	0.626497	-0.251926	0.878422	0.990329	-	-	-	-	-
Berkshire-specific A compartments	15	23800000	23820000	0.178226	-0.30467	0.482896	0.994681	-	-	-	-	-
Berkshire-specific A compartments	15	24340000	24360000	0.186777	-0.525885	0.712661	0.996096	-	-	-	-	-
Berkshire-specific A compartments	15	24360000	24380000	0.269805	-0.408392	0.678197	0.995426	-	-	-	-	-
Berkshire-specific A compartments	15	24380000	24400000	0.446609	-0.276744	0.723353	0.995685	-	-	-	-	-
Berkshire-specific A compartments	15	67640000	67660000	0.252254	-0.488018	0.740272	0.9976	-	-	-	-	-
Berkshire-specific A compartments	15	67660000	67680000	0.390635	-0.48961	0.880245	0.997825	-	-	-	-	-
Berkshire-specific A compartments	15	67680000	67700000	0.381411	-0.439526	0.820936	0.995507	-	-	-	-	-
Berkshire-specific A compartments	15	68180000	68200000	0.189907	-0.315013	0.504921	0.999628	-	-	-	-	-
Berkshire-specific A compartments	15	68680000	68700000	0.213542	-0.381618	0.59516	0.993304	-	-	-	-	-
Berkshire-specific A compartments	15	96100000	96120000	0.293507	-0.287919	0.581426	0.990769	-	-	-	-	-
Berkshire-specific A compartments	15	121720000	121740000	0.366483	-0.369315	0.735798	0.982156	-	-	-	-	-
Berkshire-specific A compartments	16	22880000	22900000	0.0753773	-0.300654	0.376032	0.992807	-	-	-	-	-
Berkshire-specific A compartments	16	30120000	30140000	0.291679	-0.294528	0.586207	0.997576	-	-	-	-	-
Berkshire-specific A compartments	16	30500000	30520000	0.159161	-0.285167	0.444328	0.991523	-	-	-	-	-
Berkshire-specific A compartments	16	37240000	37260000	0.181781	-0.104041	0.285823	0.996994	-	-	-	-	-
Berkshire-specific A compartments	16	37800000	37820000	0.137707	-0.486101	0.623808	0.997301	-	-	-	-	-
Berkshire-specific A compartments	16	39860000	39880000	0.255037	-0.241121	0.496157	0.992907	-	-	-	-	-
Berkshire-specific A compartments	16	48860000	48880000	0.150037	-0.126439	0.276476	0.994418	-	-	-	-	-
Berkshire-specific A compartments	16	53940000	53960000	0.255632	-0.272837	0.528469	0.995106	ENSSSCG00000017010	INSYN2B	0.0227982	0.0113708	-
Berkshire-specific A compartments	16	63620000	63640000	0.513486	-0.65462	1.16811	0.992222	-	-	-	-	-
Berkshire-specific A compartments	16	63640000	63660000	0.479032	-0.835273	1.3143	0.990072	-	-	-	-	-
Berkshire-specific A compartments	16	63660000	63680000	0.399325	-1.01612	1.41545	0.996606	-	-	-	-	-
Berkshire-specific A compartments	16	63940000	63960000	0.211164	-0.588916	0.800079	0.99767	-	-	-	-	-
Berkshire-specific A compartments	16	64020000	64040000	0.237789	-0.211529	0.449318	0.990945	-	-	-	-	-
Berkshire-specific A compartments	16	64400000	64420000	0.169574	-0.330547	0.500122	0.991405	-	-	-	-	-
Berkshire-specific A compartments	16	64420000	64440000	0.182647	-0.490311	0.672958	0.996687	-	-	-	-	-
Berkshire-specific A compartments	16	64580000	64600000	0.198922	-0.48973	0.688653	0.992436	ENSSSCG00000048797	Unknown	0	0	-
Berkshire-specific A compartments	16	64600000	64620000	0.326601	-0.338161	0.664762	0.995575	-	-	-	-	-
Berkshire-specific A compartments	16	64660000	64680000	0.70829	-0.163888	0.872177	0.991627	-	-	-	-	-
Berkshire-specific A compartments	16	64680000	64700000	0.474748	-0.403096	0.877844	0.991465	-	-	-	-	-
Berkshire-specific A compartments	16	64700000	64720000	0.428471	-0.301363	0.729833	0.992656	-	-	-	-	-
Berkshire-specific A compartments	16	64720000	64740000	0.485638	-0.267589	0.753227	0.994361	-	-	-	-	-
Berkshire-specific A compartments	16	64760000	64780000	0.4873	-0.0789254	0.566226	0.992444	-	-	-	-	-
Berkshire-specific A compartments	16	64820000	64840000	0.362542	-0.25691	0.619451	0.994257	-	-	-	-	-
Berkshire-specific A compartments	16	64920000	64940000	0.128207	-0.452362	0.580569	0.993416	-	-	-	-	-
Berkshire-specific A compartments	16	64940000	64960000	0.259159	-0.178548	0.437707	0.991523	ENSSSCG00000048841	Unknown	0.0997857	0.0997857	-
Berkshire-specific A compartments	16	64960000	64980000	0.314871	-0.271081	0.585952	0.994652	-	-	-	-	-
Berkshire-specific A compartments	16	65240000	65260000	0.344247	-0.160486	0.504732	0.99345	-	-	-	-	-
Berkshire-specific A compartments	16	65260000	65280000	0.509774	-0.316124	0.825899	0.992525	-	-	-	-	-
Berkshire-specific A compartments	17	13220000	13240000	0.533952	-0.276989	0.81094	0.990186	-	-	-	-	-
Berkshire-specific A compartments	17	26020000	26040000	0.16793	-0.299725	0.467655	0.996402	-	-	-	-	-
Berkshire-specific A compartments	17	27120000	27140000	0.487275	-0.385236	0.872511	0.986689	-	-	-	-	-
Berkshire-specific A compartments	17	27140000	27160000	0.540801	-0.358969	0.89977	0.994532	-	-	-	-	-
Berkshire-specific A compartments	17	27180000	27200000	0.697174	-0.242805	0.939979	0.990726	-	-	-	-	-
Berkshire-specific A compartments	17	29660000	29680000	0.611764	-0.350501	0.962264	0.989038	-	-	-	-	-
Berkshire-specific A compartments	17	46620000	46640000	0.42667	-0.356198	0.782868	0.986997	ENSSSCG00000007369	JPH2	0.335164	0.343177	-
Berkshire-specific A compartments	17	60060000	60080000	0.547022	-0.20511	0.752133	0.987182	-	-	-	-	-
Berkshire-specific A compartments	17	60120000	60140000	0.233765	-0.655143	0.888908	0.992725	-	-	-	-	-
Berkshire-specific A compartments	17	61060000	61080000	0.618788	-0.573591	1.19238	0.993318	-	-	-	-	-
Berkshire-specific A compartments	17	61080000	61100000	0.774796	-0.433085	1.20788	0.993976	-	-	-	-	-
Berkshire-specific A compartments	17	61100000	61120000	0.508994	-0.546117	1.05511	0.995301	-	-	-	-	-
Berkshire-specific A compartments	17	61140000	61160000	1.10872	-0.290123	1.39885	0.991863	ENSSSCG00000046508	Unknown	0.0105028	0.0105028	-
Berkshire-specific A compartments	17	61160000	61180000	1.28465	-0.381369	1.66602	0.994401	-	-	-	-	-
Berkshire-specific A compartments	18	700000	720000	0.505433	-0.349061	0.854494	0.989655	-	-	-	-	-
Berkshire-specific A compartments	18	2040000	2060000	0.125353	-0.162284	0.287637	0.9798	-	-	-	-	-
Berkshire-specific A compartments	18	2400000	2420000	0.165315	-0.351264	0.516579	0.986873	-	-	-	-	-
Berkshire-specific A compartments	18	7180000	7200000	0.227498	-0.308482	0.53598	0.990546	ENSSSCG00000024155	OR6V1	0	0	-
Berkshire-specific A compartments	18	7600000	7620000	0.217523	-0.359416	0.576939	0.98807	ENSSSCG00000031312;ENSSSCG00000043992;ENSSSCG00000049878	TRBV6-8;Unknown;Unknown	0;0.0290849321098625;0.0704347840135	0;0.0290849321098625;0.0704347840135	-;-;-
Berkshire-specific A compartments	18	8820000	8840000	0.504266	-0.195582	0.699848	0.991021	-	-	-	-	-
Berkshire-specific A compartments	18	10960000	10980000	0.209671	-0.104371	0.314043	0.985576	ENSSSCG00000016517	SVOPL	0.250061	0.963431	0.206067
Berkshire-specific A compartments	18	11200000	11220000	0.198663	-0.158753	0.357416	0.995922	-	-	-	-	-
Berkshire-specific A compartments	18	11420000	11440000	0.420509	-0.144468	0.564978	0.9836	-	-	-	-	-
Berkshire-specific A compartments	18	11440000	11460000	0.320222	-0.194695	0.514918	0.991822	-	-	-	-	-
Berkshire-specific A compartments	18	11460000	11480000	0.194675	-0.159075	0.353751	0.984236	-	-	-	-	-
Berkshire-specific A compartments	18	29400000	29420000	0.264037	-0.179127	0.443165	0.991931	-	-	-	-	-
Berkshire-specific A compartments	18	33560000	33580000	0.23505	-0.167202	0.402253	0.993322	-	-	-	-	-
Berkshire-specific A compartments	18	47620000	47640000	0.482081	-0.206245	0.688326	0.993326	-	-	-	-	-
Berkshire-specific A compartments	18	47740000	47760000	0.473532	-0.478506	0.952038	0.98581	-	-	-	-	-
Berkshire-specific A compartments	18	53800000	53820000	0.13713	-0.432014	0.569144	0.992412	-	-	-	-	-
More active compartments in Berkshire	1	1600000	1620000	4.60281	4.07077	0.532031	0.992855	-	-	-	-	-
More active compartments in Berkshire	1	7640000	7660000	6.66496	6.1481	0.516854	0.991523	ENSSSCG00000004050;ENSSSCG00000040317	WTAP;SOD2	109.579599637155;167.069846187808	54.1539515676447;181.947320232192	0.669255621898114;0.478686615622682
More active compartments in Berkshire	1	8140000	8160000	5.24163	4.53636	0.705271	0.988133	-	-	-	-	-
More active compartments in Berkshire	1	8780000	8800000	5.6197	5.10948	0.510228	0.986252	-	-	-	-	-
More active compartments in Berkshire	1	11360000	11380000	-1.82113	-2.65974	0.838611	0.993945	-	-	-	-	-
More active compartments in Berkshire	1	11400000	11420000	-1.66735	-2.19202	0.524667	0.993728	-	-	-	-	-
More active compartments in Berkshire	1	11460000	11480000	-0.507889	-1.08496	0.577072	0.990637	-	-	-	-	-
More active compartments in Berkshire	1	23320000	23340000	-2.6701	-3.20096	0.530864	0.992719	-	-	-	-	-
More active compartments in Berkshire	1	26300000	26320000	2.20914	1.65346	0.555682	0.988493	ENSSSCG00000038420	PERP	81.4608	56.585	0.5901
More active compartments in Berkshire	1	26460000	26480000	3.7563	3.23826	0.518045	0.989649	-	-	-	-	-
More active compartments in Berkshire	1	27200000	27220000	3.07014	2.45961	0.610526	0.986143	-	-	-	-	-
More active compartments in Berkshire	1	27400000	27420000	3.30021	2.73089	0.569324	0.992457	-	-	-	-	-
More active compartments in Berkshire	1	27520000	27540000	2.84677	2.31456	0.53221	0.994679	-	-	-	-	-
More active compartments in Berkshire	1	28060000	28080000	2.87925	2.34936	0.529891	0.994249	-	-	-	-	-
More active compartments in Berkshire	1	28260000	28280000	2.75544	2.13297	0.622465	0.989566	-	-	-	-	-
More active compartments in Berkshire	1	75660000	75680000	2.69779	2.11775	0.580041	0.992259	-	-	-	-	-
More active compartments in Berkshire	1	87440000	87460000	-2.89005	-3.94206	1.052	0.992369	-	-	-	-	-
More active compartments in Berkshire	1	92600000	92620000	-2.72432	-3.30785	0.583524	0.997365	-	-	-	-	-
More active compartments in Berkshire	1	92620000	92640000	-2.30423	-3.30235	0.99812	0.998545	-	-	-	-	-
More active compartments in Berkshire	1	92640000	92660000	-2.38392	-3.20547	0.821545	0.997926	-	-	-	-	-
More active compartments in Berkshire	1	92720000	92740000	-3.16869	-3.79663	0.627939	0.999364	-	-	-	-	-
More active compartments in Berkshire	1	92820000	92840000	-3.17106	-3.73928	0.568217	0.998436	-	-	-	-	-
More active compartments in Berkshire	1	92960000	92980000	-6.08852	-6.6126	0.524077	0.995594	-	-	-	-	-
More active compartments in Berkshire	1	92980000	93000000	-5.82745	-6.8129	0.985451	0.99371	-	-	-	-	-
More active compartments in Berkshire	1	93360000	93380000	-4.49111	-6.1856	1.69449	0.997278	-	-	-	-	-
More active compartments in Berkshire	1	116680000	116700000	-1.55708	-2.16109	0.604007	0.992233	-	-	-	-	-
More active compartments in Berkshire	1	116700000	116720000	-1.96964	-2.50807	0.538424	0.986679	-	-	-	-	-
More active compartments in Berkshire	1	116720000	116740000	-2.25422	-2.83768	0.583456	0.986014	-	-	-	-	-
More active compartments in Berkshire	1	116740000	116760000	-2.45911	-3.0243	0.565195	0.989937	-	-	-	-	-
More active compartments in Berkshire	1	116760000	116780000	-2.62931	-3.13397	0.504656	0.996833	-	-	-	-	-
More active compartments in Berkshire	1	116780000	116800000	-2.52024	-3.21826	0.698028	0.99725	-	-	-	-	-
More active compartments in Berkshire	1	116840000	116860000	-2.94519	-3.49698	0.551788	0.993954	-	-	-	-	-
More active compartments in Berkshire	1	116880000	116900000	-2.97119	-3.51829	0.547105	0.994152	-	-	-	-	-
More active compartments in Berkshire	1	116900000	116920000	-3.10677	-3.71048	0.603709	0.994074	-	-	-	-	-
More active compartments in Berkshire	1	116920000	116940000	-3.02837	-3.58335	0.55498	0.995122	-	-	-	-	-
More active compartments in Berkshire	1	116940000	116960000	-3.57214	-4.38278	0.810646	0.994166	-	-	-	-	-
More active compartments in Berkshire	1	116980000	117000000	-3.15463	-3.77529	0.620661	0.986043	-	-	-	-	-
More active compartments in Berkshire	1	117000000	117020000	-3.26866	-3.89039	0.621731	0.98799	-	-	-	-	-
More active compartments in Berkshire	1	117020000	117040000	-3.26181	-3.83689	0.575084	0.985083	-	-	-	-	-
More active compartments in Berkshire	1	117060000	117080000	-3.3038	-3.80977	0.505974	0.996756	-	-	-	-	-
More active compartments in Berkshire	1	117080000	117100000	-3.15936	-3.7528	0.593439	0.990071	-	-	-	-	-
More active compartments in Berkshire	1	117100000	117120000	-3.0721	-3.72509	0.65299	0.980783	-	-	-	-	-
More active compartments in Berkshire	1	117160000	117180000	-3.00846	-3.53805	0.529582	0.989486	-	-	-	-	-
More active compartments in Berkshire	1	117180000	117200000	-2.76122	-3.3102	0.54898	0.990178	-	-	-	-	-
More active compartments in Berkshire	1	117220000	117240000	-2.53524	-3.08238	0.547139	0.992927	-	-	-	-	-
More active compartments in Berkshire	1	117240000	117260000	-2.16765	-3.01206	0.844413	0.990361	-	-	-	-	-
More active compartments in Berkshire	1	117260000	117280000	-2.09528	-2.84231	0.747026	0.991149	-	-	-	-	-
More active compartments in Berkshire	1	117280000	117300000	-2.03248	-2.86339	0.830909	0.995758	-	-	-	-	-
More active compartments in Berkshire	1	117300000	117320000	-2.28691	-2.81931	0.532398	0.99367	-	-	-	-	-
More active compartments in Berkshire	1	117320000	117340000	-2.19208	-2.82981	0.637733	0.995785	-	-	-	-	-
More active compartments in Berkshire	1	117340000	117360000	-2.21924	-2.98891	0.769679	0.993173	-	-	-	-	-
More active compartments in Berkshire	1	117360000	117380000	-2.26962	-3.03771	0.76809	0.992619	-	-	-	-	-
More active compartments in Berkshire	1	117380000	117400000	-2.49599	-3.12256	0.626571	0.992464	-	-	-	-	-
More active compartments in Berkshire	1	117400000	117420000	-2.67076	-3.4252	0.754432	0.99617	ENSSSCG00000051452	Unknown	0.127537	0.127537	-
More active compartments in Berkshire	1	117420000	117440000	-2.63352	-3.20206	0.56854	0.994239	-	-	-	-	-
More active compartments in Berkshire	1	117440000	117460000	-2.60492	-3.25142	0.646496	0.995854	-	-	-	-	-
More active compartments in Berkshire	1	117460000	117480000	-2.48703	-3.19142	0.704384	0.989412	-	-	-	-	-
More active compartments in Berkshire	1	117480000	117500000	-2.52475	-3.22909	0.704337	0.992422	-	-	-	-	-
More active compartments in Berkshire	1	117500000	117520000	-2.56663	-3.1547	0.588074	0.991485	-	-	-	-	-
More active compartments in Berkshire	1	117520000	117540000	-2.33472	-3.21749	0.882775	0.996898	-	-	-	-	-
More active compartments in Berkshire	1	117540000	117560000	-2.50485	-3.21901	0.71416	0.995287	-	-	-	-	-
More active compartments in Berkshire	1	117560000	117580000	-2.52918	-3.24726	0.718079	0.988277	-	-	-	-	-
More active compartments in Berkshire	1	117580000	117600000	-2.57853	-3.27546	0.696937	0.994393	-	-	-	-	-
More active compartments in Berkshire	1	117600000	117620000	-2.59677	-3.30517	0.708397	0.998726	-	-	-	-	-
More active compartments in Berkshire	1	117620000	117640000	-2.68351	-3.43686	0.753343	0.99667	-	-	-	-	-
More active compartments in Berkshire	1	117640000	117660000	-2.70709	-3.4125	0.705412	0.994583	-	-	-	-	-
More active compartments in Berkshire	1	117660000	117680000	-2.66679	-3.186	0.519218	0.993933	-	-	-	-	-
More active compartments in Berkshire	1	117680000	117700000	-2.72275	-3.26652	0.543774	0.993236	-	-	-	-	-
More active compartments in Berkshire	1	117700000	117720000	-2.63876	-3.28859	0.649828	0.991854	-	-	-	-	-
More active compartments in Berkshire	1	117720000	117740000	-2.48029	-3.16085	0.680568	0.996107	-	-	-	-	-
More active compartments in Berkshire	1	117740000	117760000	-2.48462	-3.20847	0.723852	0.994439	-	-	-	-	-
More active compartments in Berkshire	1	117760000	117780000	-2.21136	-2.81012	0.59876	0.994098	ENSSSCG00000004614	UNC13C	0.65873	0.0729106	0.900346
More active compartments in Berkshire	1	117780000	117800000	-2.19087	-2.78607	0.595202	0.993144	-	-	-	-	-
More active compartments in Berkshire	1	117800000	117820000	-2.22188	-2.87997	0.658092	0.992656	-	-	-	-	-
More active compartments in Berkshire	1	117820000	117840000	-2.31476	-2.96151	0.646743	0.994839	-	-	-	-	-
More active compartments in Berkshire	1	117840000	117860000	-2.54122	-3.17292	0.631703	0.990509	-	-	-	-	-
More active compartments in Berkshire	1	117860000	117880000	-2.38391	-3.02972	0.645811	0.990212	-	-	-	-	-
More active compartments in Berkshire	1	117880000	117900000	-2.37144	-2.96265	0.591208	0.994069	-	-	-	-	-
More active compartments in Berkshire	1	173640000	173660000	-3.36252	-4.05573	0.693207	0.995195	-	-	-	-	-
More active compartments in Berkshire	1	173680000	173700000	-3.34042	-3.90205	0.561627	0.997197	-	-	-	-	-
More active compartments in Berkshire	1	173760000	173780000	-3.37292	-4.02562	0.652702	0.994974	-	-	-	-	-
More active compartments in Berkshire	1	173780000	173800000	-3.34634	-4.04583	0.699487	0.996013	-	-	-	-	-
More active compartments in Berkshire	1	214960000	214980000	-0.902717	-1.41592	0.513201	0.995578	ENSSSCG00000042982;ENSSSCG00000046128	Unknown;Unknown	0.227806446855;0.0351838270026167	0.227806446855;0.0351838270026167	-;-
More active compartments in Berkshire	1	228520000	228540000	-1.81439	-2.40004	0.585648	0.993183	ENSSSCG00000045514	Unknown	-	-	-
More active compartments in Berkshire	1	257300000	257320000	-1.9415	-2.44777	0.506266	0.994408	-	-	-	-	-
More active compartments in Berkshire	1	257540000	257560000	-1.83975	-2.35449	0.51474	0.990404	-	-	-	-	-
More active compartments in Berkshire	1	262620000	262640000	-5.39578	-6.16598	0.770194	0.99364	-	-	-	-	-
More active compartments in Berkshire	1	262680000	262700000	-5.35481	-6.32249	0.96768	0.988295	ENSSSCG00000047130	Unknown	0	0	-
More active compartments in Berkshire	2	14400000	14420000	-5.62491	-6.9416	1.3167	0.995274	ENSSSCG00000043897;ENSSSCG00000046253	Unknown;OR4X2	0;0.00811325886172167	0;0.00811325886172167	-;-
More active compartments in Berkshire	2	14500000	14520000	-3.72552	-4.29745	0.571928	0.996455	ENSSSCG00000041772	OR4B1	0.0423971	0.0423971	-
More active compartments in Berkshire	2	14520000	14540000	-3.12671	-4.17677	1.05006	0.992731	-	-	-	-	-
More active compartments in Berkshire	2	27320000	27340000	1.43623	0.867946	0.568285	0.984795	-	-	-	-	-
More active compartments in Berkshire	2	52960000	52980000	-5.00805	-5.60167	0.593623	0.975308	-	-	-	-	-
More active compartments in Berkshire	2	53000000	53020000	-5.1033	-5.64461	0.541307	0.988448	-	-	-	-	-
More active compartments in Berkshire	2	53020000	53040000	-5.0607	-5.71549	0.654791	0.984904	-	-	-	-	-
More active compartments in Berkshire	2	53040000	53060000	-5.27718	-5.98628	0.709097	0.983105	ENSSSCG00000042521	OR2T11	0	0	-
More active compartments in Berkshire	2	53140000	53160000	-5.09267	-5.64222	0.549552	0.990104	ENSSSCG00000045400	OR2T11	0	0	-
More active compartments in Berkshire	2	53280000	53300000	-4.82603	-5.49982	0.673782	0.992688	-	-	-	-	-
More active compartments in Berkshire	2	53300000	53320000	-4.90997	-5.51232	0.602351	0.992665	ENSSSCG00000024040	Unknown	0.00407666	0.00407666	-
More active compartments in Berkshire	2	53320000	53340000	-4.91927	-5.567	0.64773	0.994261	-	-	-	-	-
More active compartments in Berkshire	2	53360000	53380000	-4.93122	-5.51261	0.581387	0.992125	ENSSSCG00000046739	Unknown	0	0	-
More active compartments in Berkshire	2	53380000	53400000	-4.93805	-5.52966	0.591615	0.993604	-	-	-	-	-
More active compartments in Berkshire	2	54280000	54300000	-4.88487	-5.63811	0.753238	0.984321	-	-	-	-	-
More active compartments in Berkshire	2	54440000	54460000	-5.15906	-6.08835	0.929293	0.967246	-	-	-	-	-
More active compartments in Berkshire	2	54460000	54480000	-5.31259	-6.04937	0.736777	0.958362	ENSSSCG00000033545	OR2T35	0.0127996	0.0127996	-
More active compartments in Berkshire	2	56260000	56280000	-5.76201	-6.48902	0.727001	0.996418	-	-	-	-	-
More active compartments in Berkshire	2	65660000	65680000	-1.54354	-2.09305	0.549507	0.996579	-	-	-	-	-
More active compartments in Berkshire	2	70220000	70240000	2.1914	1.6224	0.568998	0.997346	-	-	-	-	-
More active compartments in Berkshire	2	70520000	70540000	0.925077	0.370549	0.554528	0.997476	-	-	-	-	-
More active compartments in Berkshire	2	70540000	70560000	1.29274	0.675536	0.617209	0.998103	ENSSSCG00000013609	Unknown	0.0166165	0.0166165	-
More active compartments in Berkshire	2	70580000	70600000	1.86502	1.27683	0.588193	0.997532	-	-	-	-	-
More active compartments in Berkshire	2	70840000	70860000	5.08488	4.56701	0.517874	0.996643	-	-	-	-	-
More active compartments in Berkshire	2	71880000	71900000	4.04429	3.43333	0.610957	0.994942	-	-	-	-	-
More active compartments in Berkshire	2	71920000	71940000	3.44306	2.81392	0.629138	0.99571	-	-	-	-	-
More active compartments in Berkshire	2	71940000	71960000	2.97132	2.31411	0.657212	0.997506	ENSSSCG00000033635	Unknown	0.0563318	0.0563318	-
More active compartments in Berkshire	2	71960000	71980000	2.69926	1.47803	1.22123	0.999575	ENSSSCG00000013559	MBD3L3	0.0439192	0.0439192	-
More active compartments in Berkshire	2	71980000	72000000	2.57118	1.72936	0.841815	0.999	ENSSSCG00000041386	Unknown	0.036395	0.036395	-
More active compartments in Berkshire	2	72000000	72020000	2.49349	1.76575	0.727741	0.999378	-	-	-	-	-
More active compartments in Berkshire	2	72020000	72040000	2.3182	1.31858	0.999617	0.999328	ENSSSCG00000040926;ENSSSCG00000050658	Unknown;Unknown	0;0.0363949850121833	0;0.0363949850121833	-;-
More active compartments in Berkshire	2	72040000	72060000	2.31174	1.21288	1.09886	0.999447	ENSSSCG00000044953	MBD3L3	0	0	-
More active compartments in Berkshire	2	72060000	72080000	2.01843	1.23024	0.788192	0.998992	ENSSSCG00000046190	Unknown	0.036395	0.036395	-
More active compartments in Berkshire	2	72080000	72100000	2.0106	1.27352	0.737083	0.999225	-	-	-	-	-
More active compartments in Berkshire	2	72100000	72120000	2.13938	1.46442	0.674956	0.995342	ENSSSCG00000026402	Unknown	1.11077	0.623675	0.640417
More active compartments in Berkshire	2	72120000	72140000	2.04331	1.45652	0.586787	0.996098	-	-	-	-	-
More active compartments in Berkshire	2	72140000	72160000	2.14186	1.54305	0.598819	0.998853	ENSSSCG00000050480;ENSSSCG00000050577	Unknown;Unknown	0.0620738688922625;-	0.0620738688922625;-	-;-
More active compartments in Berkshire	2	72160000	72180000	2.05786	1.3961	0.661754	0.997671	-	-	-	-	-
More active compartments in Berkshire	2	72240000	72260000	2.39101	1.8106	0.580406	0.991151	-	-	-	-	-
More active compartments in Berkshire	2	73380000	73400000	5.09325	4.5438	0.54945	0.998667	-	-	-	-	-
More active compartments in Berkshire	2	104800000	104820000	-3.67198	-4.26164	0.589659	0.999917	-	-	-	-	-
More active compartments in Berkshire	2	106160000	106180000	-2.87879	-3.41291	0.534121	0.994689	-	-	-	-	-
More active compartments in Berkshire	2	106240000	106260000	-2.4695	-3.03068	0.561174	0.99161	-	-	-	-	-
More active compartments in Berkshire	2	128600000	128620000	-0.739325	-1.28032	0.540997	0.987083	-	-	-	-	-
More active compartments in Berkshire	2	128760000	128780000	-1.5359	-2.05536	0.519464	0.986094	-	-	-	-	-
More active compartments in Berkshire	2	141060000	141080000	6.31869	5.7796	0.539093	0.987958	-	-	-	-	-
More active compartments in Berkshire	2	142820000	142840000	-4.38787	-4.94495	0.557083	0.991533	-	-	-	-	-
More active compartments in Berkshire	2	142840000	142860000	-3.76814	-4.39743	0.629298	0.990871	ENSSSCG00000036516	PCDHB4	1.17428	0.655365	0.641809
More active compartments in Berkshire	2	143400000	143420000	3.99296	3.36511	0.627851	0.981165	-	-	-	-	-
More active compartments in Berkshire	2	143420000	143440000	3.79821	3.26578	0.532422	0.983772	-	-	-	-	-
More active compartments in Berkshire	2	143440000	143460000	4.07059	3.55058	0.520016	0.986986	-	-	-	-	-
More active compartments in Berkshire	2	143460000	143480000	4.4606	3.845	0.6156	0.992163	-	-	-	-	-
More active compartments in Berkshire	2	143480000	143500000	4.52534	4.02472	0.500624	0.992048	-	-	-	-	-
More active compartments in Berkshire	2	145500000	145520000	-2.03674	-2.65085	0.61411	0.985591	-	-	-	-	-
More active compartments in Berkshire	2	145860000	145880000	-7.02901	-7.64456	0.615549	0.987589	-	-	-	-	-
More active compartments in Berkshire	2	150740000	150760000	7.41396	6.8953	0.518658	0.988358	-	-	-	-	-
More active compartments in Berkshire	2	151200000	151220000	8.44758	7.77683	0.670759	0.992474	ENSSSCG00000014445	CDX1	0.0343231	0.0343231	-
More active compartments in Berkshire	3	21140000	21160000	-3.85865	-4.37634	0.517692	0.986415	-	-	-	-	-
More active compartments in Berkshire	3	57360000	57380000	1.6532	0.974966	0.67823	0.993809	-	-	-	-	-
More active compartments in Berkshire	3	57440000	57460000	2.27907	1.73841	0.54066	0.992588	-	-	-	-	-
More active compartments in Berkshire	3	60260000	60280000	-3.41881	-3.93203	0.513219	0.993785	-	-	-	-	-
More active compartments in Berkshire	3	60300000	60320000	-3.4395	-4.06992	0.630424	0.993839	-	-	-	-	-
More active compartments in Berkshire	3	60340000	60360000	-3.65516	-4.21639	0.561228	0.989727	-	-	-	-	-
More active compartments in Berkshire	3	60360000	60380000	-3.65906	-4.32485	0.665793	0.99333	-	-	-	-	-
More active compartments in Berkshire	3	60380000	60400000	-3.55268	-4.09327	0.540583	0.991837	-	-	-	-	-
More active compartments in Berkshire	3	60400000	60420000	-3.6172	-4.14963	0.532425	0.990366	-	-	-	-	-
More active compartments in Berkshire	3	60420000	60440000	-3.51982	-4.14262	0.622799	0.994442	-	-	-	-	-
More active compartments in Berkshire	3	60460000	60480000	-3.57826	-4.28788	0.709624	0.992763	-	-	-	-	-
More active compartments in Berkshire	3	60480000	60500000	-3.79812	-4.32821	0.530093	0.991292	-	-	-	-	-
More active compartments in Berkshire	3	60500000	60520000	-3.71483	-4.30829	0.593454	0.992725	-	-	-	-	-
More active compartments in Berkshire	3	60520000	60540000	-3.72431	-4.26814	0.543831	0.99296	-	-	-	-	-
More active compartments in Berkshire	3	60540000	60560000	-3.43236	-4.40581	0.973457	0.986267	-	-	-	-	-
More active compartments in Berkshire	3	60560000	60580000	-3.85018	-4.42486	0.574683	0.982962	-	-	-	-	-
More active compartments in Berkshire	3	60580000	60600000	-3.91095	-4.51298	0.602026	0.991161	-	-	-	-	-
More active compartments in Berkshire	3	60600000	60620000	-3.96674	-4.64807	0.681324	0.992697	-	-	-	-	-
More active compartments in Berkshire	3	60620000	60640000	-4.01342	-4.60561	0.592188	0.995685	-	-	-	-	-
More active compartments in Berkshire	3	78400000	78420000	-0.584539	-1.10374	0.519205	0.989791	-	-	-	-	-
More active compartments in Berkshire	3	78440000	78460000	-0.813867	-1.33194	0.518074	0.995971	ENSSSCG00000025751	MDH1	628.728	611.628	0.506893
More active compartments in Berkshire	3	78480000	78500000	-1.55384	-2.06681	0.512967	0.996883	-	-	-	-	-
More active compartments in Berkshire	3	78500000	78520000	-1.96163	-2.5191	0.557463	0.996051	-	-	-	-	-
More active compartments in Berkshire	3	78520000	78540000	-1.99849	-2.62385	0.625351	0.994858	-	-	-	-	-
More active compartments in Berkshire	3	78560000	78580000	-2.39671	-2.91954	0.522828	0.996684	-	-	-	-	-
More active compartments in Berkshire	3	78580000	78600000	-2.37971	-3.15208	0.772372	0.996751	-	-	-	-	-
More active compartments in Berkshire	3	78600000	78620000	-2.64821	-3.21964	0.571426	0.99408	-	-	-	-	-
More active compartments in Berkshire	3	78620000	78640000	-2.79507	-3.41762	0.622546	0.994189	-	-	-	-	-
More active compartments in Berkshire	3	78640000	78660000	-2.95996	-3.54605	0.586085	0.994527	-	-	-	-	-
More active compartments in Berkshire	3	78660000	78680000	-2.98367	-3.68944	0.705771	0.993249	-	-	-	-	-
More active compartments in Berkshire	3	78680000	78700000	-3.09103	-3.64657	0.555547	0.995384	-	-	-	-	-
More active compartments in Berkshire	3	78700000	78720000	-2.98442	-3.70184	0.717419	0.993541	-	-	-	-	-
More active compartments in Berkshire	3	78720000	78740000	-3.06935	-3.58042	0.511074	0.990453	-	-	-	-	-
More active compartments in Berkshire	3	78740000	78760000	-3.14079	-3.73601	0.595222	0.995458	-	-	-	-	-
More active compartments in Berkshire	3	78780000	78800000	-3.08718	-3.61269	0.525506	0.995771	-	-	-	-	-
More active compartments in Berkshire	3	78800000	78820000	-2.88422	-3.61659	0.732368	0.992342	-	-	-	-	-
More active compartments in Berkshire	3	78820000	78840000	-2.75895	-3.31671	0.557764	0.996032	-	-	-	-	-
More active compartments in Berkshire	3	78840000	78860000	-2.45916	-3.11221	0.653055	0.996452	-	-	-	-	-
More active compartments in Berkshire	3	78880000	78900000	-1.69322	-2.22736	0.53414	0.998626	-	-	-	-	-
More active compartments in Berkshire	3	78900000	78920000	-1.20017	-1.71802	0.517846	0.998425	ENSSSCG00000037564	OTX1	0.0253258	0.0253258	-
More active compartments in Berkshire	3	78920000	78940000	-0.955535	-1.50874	0.5532	0.99786	-	-	-	-	-
More active compartments in Berkshire	3	78940000	78960000	-0.756299	-1.31064	0.55434	0.998393	-	-	-	-	-
More active compartments in Berkshire	3	95140000	95160000	-0.279645	-0.826401	0.546757	0.994151	-	-	-	-	-
More active compartments in Berkshire	3	95320000	95340000	-0.732228	-1.34719	0.614957	0.991767	-	-	-	-	-
More active compartments in Berkshire	3	95380000	95400000	-0.899654	-1.41606	0.516402	0.990823	-	-	-	-	-
More active compartments in Berkshire	3	95400000	95420000	-0.919632	-1.43401	0.514379	0.989858	-	-	-	-	-
More active compartments in Berkshire	3	95500000	95520000	-0.552969	-1.09579	0.542822	0.990377	-	-	-	-	-
More active compartments in Berkshire	3	95520000	95540000	-0.767517	-1.365	0.597487	0.994771	ENSSSCG00000039283	SIX3	0.0112991	0.0112991	-
More active compartments in Berkshire	3	95540000	95560000	-1.02431	-1.66932	0.645007	0.990344	-	-	-	-	-
More active compartments in Berkshire	3	95560000	95580000	-1.2138	-1.79335	0.579543	0.988938	-	-	-	-	-
More active compartments in Berkshire	3	95600000	95620000	-1.33354	-1.95102	0.617485	0.983276	-	-	-	-	-
More active compartments in Berkshire	3	95620000	95640000	-1.38408	-2.02475	0.640661	0.991135	-	-	-	-	-
More active compartments in Berkshire	3	95640000	95660000	-1.34104	-1.98741	0.646373	0.991559	-	-	-	-	-
More active compartments in Berkshire	3	95660000	95680000	-1.49227	-2.04968	0.557418	0.990216	-	-	-	-	-
More active compartments in Berkshire	3	95680000	95700000	-1.39849	-1.96623	0.567739	0.992851	-	-	-	-	-
More active compartments in Berkshire	3	95720000	95740000	-1.52728	-2.28398	0.7567	0.995177	-	-	-	-	-
More active compartments in Berkshire	3	95740000	95760000	-1.4541	-2.03659	0.582497	0.993343	-	-	-	-	-
More active compartments in Berkshire	3	95760000	95780000	-1.50898	-2.06671	0.557733	0.99433	-	-	-	-	-
More active compartments in Berkshire	3	95780000	95800000	-1.56487	-2.25947	0.694593	0.993543	-	-	-	-	-
More active compartments in Berkshire	3	95800000	95820000	-1.49353	-2.37032	0.876796	0.989347	-	-	-	-	-
More active compartments in Berkshire	3	95820000	95840000	-1.46184	-2.25488	0.793033	0.994327	-	-	-	-	-
More active compartments in Berkshire	3	95840000	95860000	-1.32761	-2.2015	0.873883	0.99216	-	-	-	-	-
More active compartments in Berkshire	3	95860000	95880000	-1.2457	-1.94006	0.694361	0.992159	-	-	-	-	-
More active compartments in Berkshire	3	95880000	95900000	-1.28155	-2.02439	0.742841	0.997677	-	-	-	-	-
More active compartments in Berkshire	3	95920000	95940000	-1.14558	-1.77575	0.63017	0.998343	-	-	-	-	-
More active compartments in Berkshire	3	95940000	95960000	-1.11107	-1.63119	0.520117	0.998282	-	-	-	-	-
More active compartments in Berkshire	3	95960000	95980000	-0.858133	-1.54519	0.687053	0.99493	-	-	-	-	-
More active compartments in Berkshire	3	95980000	96000000	-0.626392	-1.3603	0.73391	0.997264	-	-	-	-	-
More active compartments in Berkshire	3	96000000	96020000	-0.5065	-1.22059	0.714092	0.994795	-	-	-	-	-
More active compartments in Berkshire	3	96020000	96040000	-0.414355	-1.05018	0.635824	0.991088	-	-	-	-	-
More active compartments in Berkshire	3	96140000	96160000	1.35218	0.828754	0.523422	0.9939	-	-	-	-	-
More active compartments in Berkshire	3	96360000	96380000	1.92646	1.39076	0.535706	0.990107	-	-	-	-	-
More active compartments in Berkshire	3	98700000	98720000	-4.59927	-5.10038	0.501113	0.993096	-	-	-	-	-
More active compartments in Berkshire	3	98760000	98780000	-4.64434	-5.18783	0.543485	0.991806	-	-	-	-	-
More active compartments in Berkshire	3	98780000	98800000	-4.61046	-5.20887	0.598406	0.991201	-	-	-	-	-
More active compartments in Berkshire	3	98800000	98820000	-4.62554	-5.13936	0.513813	0.987828	-	-	-	-	-
More active compartments in Berkshire	3	98840000	98860000	-4.36187	-5.12121	0.759334	0.993097	-	-	-	-	-
More active compartments in Berkshire	3	99060000	99080000	-4.55016	-5.07933	0.529163	0.995898	-	-	-	-	-
More active compartments in Berkshire	3	104680000	104700000	-5.12123	-5.7521	0.630874	0.990395	-	-	-	-	-
More active compartments in Berkshire	3	122060000	122080000	-1.12793	-1.72299	0.595063	0.983969	ENSSSCG00000045349	Unknown	0.788027	0.659876	0.544254
More active compartments in Berkshire	3	127280000	127300000	3.36572	2.712	0.653726	0.986909	-	-	-	-	-
More active compartments in Berkshire	4	60000	80000	6.65853	6.05689	0.601634	0.997233	ENSSSCG00000005880	C8orf33	5.29834	7.47154	0.414909
More active compartments in Berkshire	4	1360000	1380000	4.65584	3.84489	0.810956	0.994266	ENSSSCG00000031205;ENSSSCG00000031563;ENSSSCG00000039313	Unknown;Unknown;Unknown	0.0184963958255;0.052371969096;0.05485481616951	0.0184963958255;0.052371969096;0.05485481616951	-;-;-
More active compartments in Berkshire	4	1900000	1920000	3.08776	2.50863	0.579133	0.983193	-	-	-	-	-
More active compartments in Berkshire	4	5980000	6000000	-2.43841	-2.96283	0.524428	0.987777	-	-	-	-	-
More active compartments in Berkshire	4	6000000	6020000	-2.29639	-2.85767	0.561283	0.985593	-	-	-	-	-
More active compartments in Berkshire	4	6020000	6040000	-2.39705	-2.93386	0.536808	0.982984	-	-	-	-	-
More active compartments in Berkshire	4	6040000	6060000	-2.26646	-2.86268	0.596219	0.982048	-	-	-	-	-
More active compartments in Berkshire	4	6060000	6080000	-1.99982	-2.7099	0.710078	0.978935	-	-	-	-	-
More active compartments in Berkshire	4	6100000	6120000	-2.05534	-2.62324	0.5679	0.982504	-	-	-	-	-
More active compartments in Berkshire	4	8480000	8500000	2.65478	2.04395	0.61083	0.984959	ENSSSCG00000005951	TMEM71	2.6794	1.11797	0.705594
More active compartments in Berkshire	4	8520000	8540000	1.95961	1.23692	0.722687	0.9854	ENSSSCG00000005952	LRRC6	0.357807	0.299972	-
More active compartments in Berkshire	4	8540000	8560000	1.72548	1.05888	0.666605	0.981638	-	-	-	-	-
More active compartments in Berkshire	4	9260000	9280000	-2.03885	-2.56423	0.525378	0.981338	-	-	-	-	-
More active compartments in Berkshire	4	9980000	10000000	0.94431	0.420774	0.523536	0.994331	-	-	-	-	-
More active compartments in Berkshire	4	10740000	10760000	1.66714	1.15773	0.509413	0.985613	ENSSSCG00000005962	GSDMC	0.140194	0.140194	-
More active compartments in Berkshire	4	101140000	101160000	1.51433	0.71328	0.801055	0.99945	-	-	-	-	-
More active compartments in Berkshire	4	101240000	101260000	-0.805894	-3.26443	2.45854	0.999953	ENSSSCG00000045266	NBPF19	0.0312988	0.0312988	-
More active compartments in Berkshire	4	101280000	101300000	-1.0034	-2.88342	1.88002	0.999253	ENSSSCG00000044715	NBPF19	0	0	-
More active compartments in Berkshire	4	101340000	101360000	-0.555505	-1.57712	1.02162	0.998292	-	-	-	-	-
More active compartments in Berkshire	4	114420000	114440000	-5.63305	-6.17682	0.543776	0.986207	-	-	-	-	-
More active compartments in Berkshire	4	114560000	114580000	-4.82965	-5.47984	0.650193	0.987432	-	-	-	-	-
More active compartments in Berkshire	4	114580000	114600000	-4.53558	-5.50641	0.970832	0.990189	-	-	-	-	-
More active compartments in Berkshire	4	114600000	114620000	-4.52194	-5.19644	0.674497	0.986872	-	-	-	-	-
More active compartments in Berkshire	4	114620000	114640000	-4.55167	-5.55806	1.00639	0.985015	-	-	-	-	-
More active compartments in Berkshire	4	114640000	114660000	-4.60741	-5.90958	1.30217	0.986589	-	-	-	-	-
More active compartments in Berkshire	4	114700000	114720000	-5.33182	-5.98485	0.65303	0.985711	-	-	-	-	-
More active compartments in Berkshire	4	114720000	114740000	-4.94977	-6.20818	1.25841	0.990647	-	-	-	-	-
More active compartments in Berkshire	4	114760000	114780000	-5.06641	-5.98584	0.919431	0.987658	-	-	-	-	-
More active compartments in Berkshire	4	114780000	114800000	-5.1759	-6.04048	0.864575	0.988731	-	-	-	-	-
More active compartments in Berkshire	4	114800000	114820000	-5.35379	-6.1407	0.786919	0.988602	-	-	-	-	-
More active compartments in Berkshire	4	114860000	114880000	-5.91076	-6.50165	0.590895	0.986138	-	-	-	-	-
More active compartments in Berkshire	4	114920000	114940000	-6.04607	-6.57683	0.530763	0.988694	-	-	-	-	-
More active compartments in Berkshire	4	115000000	115020000	-6.09301	-6.59454	0.501531	0.992708	-	-	-	-	-
More active compartments in Berkshire	4	115140000	115160000	-6.11058	-6.61118	0.500599	0.98618	-	-	-	-	-
More active compartments in Berkshire	4	115280000	115300000	-2.4955	-3.14603	0.650524	0.994544	-	-	-	-	-
More active compartments in Berkshire	4	115300000	115320000	-2.17733	-2.69888	0.521554	0.993475	ENSSSCG00000030140;ENSSSCG00000037254	AMY1C;RNPC3	0.0483880894690313;-	0.041389960094267;-	-;-
More active compartments in Berkshire	4	115320000	115340000	-2.94866	-3.63716	0.6885	0.993067	-	-	-	-	-
More active compartments in Berkshire	4	115340000	115360000	-3.66114	-4.26814	0.607001	0.996867	-	-	-	-	-
More active compartments in Berkshire	4	115360000	115380000	-3.88626	-4.56544	0.679181	0.99683	-	-	-	-	-
More active compartments in Berkshire	4	115380000	115400000	-4.16736	-4.76051	0.593146	0.997036	-	-	-	-	-
More active compartments in Berkshire	4	115400000	115420000	-4.41122	-5.15539	0.744163	0.992749	-	-	-	-	-
More active compartments in Berkshire	4	115460000	115480000	-4.45804	-5.16798	0.709939	0.988982	-	-	-	-	-
More active compartments in Berkshire	4	115480000	115500000	-4.48831	-5.273	0.784692	0.996052	-	-	-	-	-
More active compartments in Berkshire	4	115500000	115520000	-4.56622	-5.28994	0.723721	0.998514	-	-	-	-	-
More active compartments in Berkshire	4	115520000	115540000	-4.62508	-5.33409	0.709015	0.998359	-	-	-	-	-
More active compartments in Berkshire	4	115540000	115560000	-4.36635	-5.48215	1.1158	0.997289	ENSSSCG00000006857	COL11A1	0.649836	0.190811	0.773019
More active compartments in Berkshire	4	115560000	115580000	-4.81494	-5.42794	0.613007	0.997866	-	-	-	-	-
More active compartments in Berkshire	4	115580000	115600000	-4.70798	-5.31803	0.610047	0.996891	-	-	-	-	-
More active compartments in Berkshire	4	115600000	115620000	-4.57865	-5.16711	0.588463	0.996614	-	-	-	-	-
More active compartments in Berkshire	4	115620000	115640000	-4.23722	-4.87465	0.637429	0.988627	-	-	-	-	-
More active compartments in Berkshire	4	115660000	115680000	-4.54931	-5.3657	0.816385	0.995924	-	-	-	-	-
More active compartments in Berkshire	4	115680000	115700000	-4.81454	-5.33142	0.516889	0.989418	-	-	-	-	-
More active compartments in Berkshire	4	115700000	115720000	-4.77275	-5.51018	0.737428	0.990571	-	-	-	-	-
More active compartments in Berkshire	4	115720000	115740000	-4.5067	-5.33811	0.831412	0.990272	-	-	-	-	-
More active compartments in Berkshire	4	115740000	115760000	-4.55474	-5.12944	0.574696	0.991634	-	-	-	-	-
More active compartments in Berkshire	4	115780000	115800000	-4.63787	-5.43966	0.801791	0.992344	-	-	-	-	-
More active compartments in Berkshire	4	115860000	115880000	-4.61156	-5.37116	0.759601	0.990617	-	-	-	-	-
More active compartments in Berkshire	4	115920000	115940000	-4.83036	-5.63293	0.802569	0.98892	-	-	-	-	-
More active compartments in Berkshire	4	115940000	115960000	-4.92736	-5.51834	0.590982	0.988279	-	-	-	-	-
More active compartments in Berkshire	4	115960000	115980000	-5.01113	-5.68333	0.672197	0.990689	-	-	-	-	-
More active compartments in Berkshire	4	115980000	116000000	-5.00152	-5.75114	0.74962	0.985959	-	-	-	-	-
More active compartments in Berkshire	4	116000000	116020000	-4.81852	-5.61397	0.795449	0.987999	-	-	-	-	-
More active compartments in Berkshire	4	116040000	116060000	-4.85135	-5.4278	0.576447	0.988296	-	-	-	-	-
More active compartments in Berkshire	4	116060000	116080000	-4.8009	-5.7127	0.911803	0.991221	-	-	-	-	-
More active compartments in Berkshire	4	116100000	116120000	-5.25936	-5.88667	0.627311	0.985119	-	-	-	-	-
More active compartments in Berkshire	4	116120000	116140000	-5.14931	-5.72594	0.57663	0.992276	-	-	-	-	-
More active compartments in Berkshire	4	116200000	116220000	-5.38509	-6.04592	0.660836	0.991162	-	-	-	-	-
More active compartments in Berkshire	4	116220000	116240000	-5.34064	-6.17985	0.839211	0.993848	-	-	-	-	-
More active compartments in Berkshire	4	116240000	116260000	-5.4538	-6.11458	0.660782	0.991181	-	-	-	-	-
More active compartments in Berkshire	4	116260000	116280000	-5.60531	-6.19927	0.593964	0.986809	-	-	-	-	-
More active compartments in Berkshire	4	116280000	116300000	-5.5109	-6.12581	0.614911	0.986683	-	-	-	-	-
More active compartments in Berkshire	4	116340000	116360000	-5.51423	-6.13124	0.617013	0.987519	-	-	-	-	-
More active compartments in Berkshire	4	116360000	116380000	-5.65432	-6.20027	0.545946	0.986257	-	-	-	-	-
More active compartments in Berkshire	4	116380000	116400000	-5.44674	-6.13748	0.69074	0.987542	-	-	-	-	-
More active compartments in Berkshire	5	1440000	1460000	2.81533	2.31501	0.500324	0.983006	-	-	-	-	-
More active compartments in Berkshire	5	2340000	2360000	2.0142	1.50839	0.505808	0.986486	-	-	-	-	-
More active compartments in Berkshire	5	3100000	3120000	4.55869	2.89402	1.66467	0.9994	-	-	-	-	-
More active compartments in Berkshire	5	12260000	12280000	1.45816	0.938269	0.519894	0.995753	-	-	-	-	-
More active compartments in Berkshire	5	19680000	19700000	1.43043	0.885329	0.545103	0.992112	-	-	-	-	-
More active compartments in Berkshire	5	19800000	19820000	-2.07803	-2.64063	0.5626	0.986722	-	-	-	-	-
More active compartments in Berkshire	5	19820000	19840000	-2.50382	-3.06656	0.56274	0.980531	-	-	-	-	-
More active compartments in Berkshire	5	19860000	19880000	-3.14231	-3.85796	0.715653	0.985821	-	-	-	-	-
More active compartments in Berkshire	5	19880000	19900000	-3.52083	-4.15829	0.637458	0.998945	-	-	-	-	-
More active compartments in Berkshire	5	19920000	19940000	-4.18449	-4.9808	0.796313	0.997277	-	-	-	-	-
More active compartments in Berkshire	5	20000000	20020000	-4.36272	-5.01123	0.648505	0.992604	ENSSSCG00000000299	TESPA1	0.592381	0.528749	0.528379
More active compartments in Berkshire	5	20700000	20720000	-8.46788	-9.37192	0.904033	0.984702	-	-	-	-	-
More active compartments in Berkshire	5	20720000	20740000	-8.12681	-8.84512	0.718308	0.992026	-	-	-	-	-
More active compartments in Berkshire	5	20740000	20760000	-8.48484	-9.31831	0.833468	0.997174	ENSSSCG00000042907;ENSSSCG00000043732	Unknown;Unknown	0.0358599623500833;0.0999934546485333	0.0358599623500833;0.0999934546485333	-;-
More active compartments in Berkshire	5	20800000	20820000	-7.90114	-8.91629	1.01514	0.999347	ENSSSCG00000047831	Unknown	0.0176386	0.0176386	-
More active compartments in Berkshire	5	20820000	20840000	-7.16813	-8.91652	1.74839	0.998789	ENSSSCG00000041091	Unknown	0.00988745	0.00988745	-
More active compartments in Berkshire	5	20940000	20960000	-3.55794	-5.05564	1.4977	0.999833	-	-	-	-	-
More active compartments in Berkshire	5	20960000	20980000	-5.17965	-7.56944	2.38979	0.997144	-	-	-	-	-
More active compartments in Berkshire	5	21000000	21020000	-3.7148	-4.68772	0.972918	0.992064	ENSSSCG00000035932	Unknown	0	0	-
More active compartments in Berkshire	5	21020000	21040000	-3.87421	-4.54552	0.671315	0.996962	ENSSSCG00000050560	Unknown	0.00922775	0.00922775	-
More active compartments in Berkshire	5	21060000	21080000	-2.73279	-3.27884	0.546053	0.989613	ENSSSCG00000031722;ENSSSCG00000040235	Unknown;Unknown	0.040932500015125;0	0.040932500015125;0	-;-
More active compartments in Berkshire	5	25500000	25520000	-3.78335	-4.30409	0.520741	0.986251	-	-	-	-	-
More active compartments in Berkshire	5	25620000	25640000	-3.69131	-4.30576	0.614446	0.978039	-	-	-	-	-
More active compartments in Berkshire	5	25680000	25700000	-3.71046	-4.23652	0.526066	0.98717	ENSSSCG00000049561	Unknown	2.95793	0.739483	0.8
More active compartments in Berkshire	5	25700000	25720000	-3.73309	-4.42648	0.693388	0.987512	ENSSSCG00000042934	Unknown	0.178067	0.178067	-
More active compartments in Berkshire	5	25720000	25740000	-3.65428	-4.2352	0.580927	0.991235	-	-	-	-	-
More active compartments in Berkshire	5	25780000	25800000	-3.67685	-4.27353	0.596683	0.999086	-	-	-	-	-
More active compartments in Berkshire	5	25800000	25820000	-3.72427	-4.38532	0.661046	0.997159	-	-	-	-	-
More active compartments in Berkshire	5	25820000	25840000	-3.63375	-4.32664	0.692885	0.996381	-	-	-	-	-
More active compartments in Berkshire	5	25860000	25880000	-3.63965	-4.31357	0.673926	0.988281	-	-	-	-	-
More active compartments in Berkshire	5	25880000	25900000	-3.5753	-4.41974	0.844445	0.992107	-	-	-	-	-
More active compartments in Berkshire	5	25900000	25920000	-3.6368	-4.3279	0.691094	0.997435	-	-	-	-	-
More active compartments in Berkshire	5	25920000	25940000	-3.58658	-4.32316	0.736579	0.99163	-	-	-	-	-
More active compartments in Berkshire	5	25960000	25980000	-3.35002	-4.18934	0.839327	0.985188	ENSSSCG00000044956	L1TD1	-	-	-
More active compartments in Berkshire	5	25980000	26000000	-3.36962	-4.08581	0.716194	0.988724	-	-	-	-	-
More active compartments in Berkshire	5	26000000	26020000	-3.4082	-3.93634	0.528145	0.989572	-	-	-	-	-
More active compartments in Berkshire	5	26020000	26040000	-3.41318	-4.02	0.606824	0.990459	-	-	-	-	-
More active compartments in Berkshire	5	26040000	26060000	-3.27315	-3.95565	0.682506	0.993961	-	-	-	-	-
More active compartments in Berkshire	5	26060000	26080000	-3.18198	-3.95564	0.77366	0.989936	-	-	-	-	-
More active compartments in Berkshire	5	26080000	26100000	-3.1345	-3.9116	0.777098	0.990046	-	-	-	-	-
More active compartments in Berkshire	5	26100000	26120000	-3.18555	-3.75583	0.570282	0.993537	-	-	-	-	-
More active compartments in Berkshire	5	26180000	26200000	-3.20337	-3.79401	0.590635	0.994472	-	-	-	-	-
More active compartments in Berkshire	5	26460000	26480000	-2.87476	-3.3816	0.506847	0.988292	-	-	-	-	-
More active compartments in Berkshire	5	34620000	34640000	-1.32965	-1.83368	0.504032	0.993101	-	-	-	-	-
More active compartments in Berkshire	5	34920000	34940000	-2.86271	-3.55425	0.691541	0.990791	-	-	-	-	-
More active compartments in Berkshire	5	34940000	34960000	-2.90781	-3.49471	0.586899	0.992702	-	-	-	-	-
More active compartments in Berkshire	5	35040000	35060000	-3.04333	-3.58979	0.546466	0.991079	-	-	-	-	-
More active compartments in Berkshire	5	35180000	35200000	-3.04243	-3.5578	0.515372	0.995679	-	-	-	-	-
More active compartments in Berkshire	5	39920000	39940000	-6.00426	-6.62204	0.617781	0.993148	-	-	-	-	-
More active compartments in Berkshire	5	78540000	78560000	-3.47839	-3.9902	0.511817	0.992366	-	-	-	-	-
More active compartments in Berkshire	5	101960000	101980000	-2.05248	-2.93509	0.882611	0.987748	-	-	-	-	-
More active compartments in Berkshire	5	101980000	102000000	-2.51537	-3.17208	0.656703	0.987183	-	-	-	-	-
More active compartments in Berkshire	5	102000000	102020000	-2.73775	-3.41458	0.676832	0.98958	-	-	-	-	-
More active compartments in Berkshire	5	102020000	102040000	-2.66315	-3.53396	0.870816	0.986082	ENSSSCG00000000948	SYT1	0.404499	0.2623	-
More active compartments in Berkshire	5	102060000	102080000	-2.59106	-3.66491	1.07385	0.990995	-	-	-	-	-
More active compartments in Berkshire	5	102100000	102120000	-3.21458	-4.06091	0.846325	0.989094	-	-	-	-	-
More active compartments in Berkshire	5	102180000	102200000	-3.21886	-4.12969	0.910824	0.986079	-	-	-	-	-
More active compartments in Berkshire	5	102200000	102220000	-3.12583	-3.92187	0.796036	0.992933	-	-	-	-	-
More active compartments in Berkshire	5	102260000	102280000	-3.11461	-4.0333	0.918686	0.991574	-	-	-	-	-
More active compartments in Berkshire	5	102300000	102320000	-3.48068	-4.20385	0.723169	0.987199	-	-	-	-	-
More active compartments in Berkshire	5	102340000	102360000	-3.3507	-4.07702	0.726322	0.99068	-	-	-	-	-
More active compartments in Berkshire	5	102360000	102380000	-3.23412	-4.23421	1.00009	0.989554	-	-	-	-	-
More active compartments in Berkshire	5	102460000	102480000	-3.25937	-4.1645	0.905129	0.994366	-	-	-	-	-
More active compartments in Berkshire	5	102720000	102740000	-2.8632	-3.70452	0.841313	0.991513	-	-	-	-	-
More active compartments in Berkshire	5	102780000	102800000	-2.7859	-3.40029	0.614392	0.994587	-	-	-	-	-
More active compartments in Berkshire	5	102880000	102900000	-2.44335	-3.41149	0.968144	0.991934	-	-	-	-	-
More active compartments in Berkshire	5	102940000	102960000	-2.60926	-3.43025	0.820992	0.993204	-	-	-	-	-
More active compartments in Berkshire	5	102960000	102980000	-2.59678	-3.32357	0.72679	0.989553	-	-	-	-	-
More active compartments in Berkshire	5	103000000	103020000	-2.62534	-3.43206	0.806723	0.995952	-	-	-	-	-
More active compartments in Berkshire	5	103020000	103040000	-2.48847	-3.16187	0.673398	0.996766	-	-	-	-	-
More active compartments in Berkshire	5	103100000	103120000	-2.62418	-3.23371	0.609528	0.991861	-	-	-	-	-
More active compartments in Berkshire	5	103140000	103160000	-2.24094	-3.10884	0.867899	0.988285	-	-	-	-	-
More active compartments in Berkshire	5	103180000	103200000	-2.25368	-3.13119	0.877503	0.991297	-	-	-	-	-
More active compartments in Berkshire	5	103200000	103220000	-2.20426	-2.96546	0.761208	0.992199	-	-	-	-	-
More active compartments in Berkshire	5	103240000	103260000	-1.62248	-2.35437	0.731893	0.992581	-	-	-	-	-
More active compartments in Berkshire	5	103440000	103460000	-1.31865	-1.93483	0.616184	0.990316	-	-	-	-	-
More active compartments in Berkshire	5	103460000	103480000	-1.44825	-2.08309	0.634837	0.994471	-	-	-	-	-
More active compartments in Berkshire	5	103520000	103540000	-1.53164	-2.23823	0.706598	0.991368	-	-	-	-	-
More active compartments in Berkshire	5	103540000	103560000	-1.31627	-2.35985	1.04358	0.993967	-	-	-	-	-
More active compartments in Berkshire	5	103560000	103580000	-1.41633	-2.14765	0.731326	0.991134	-	-	-	-	-
More active compartments in Berkshire	5	103620000	103640000	-1.0942	-1.8601	0.765899	0.995494	-	-	-	-	-
More active compartments in Berkshire	5	103660000	103680000	-0.736977	-1.46047	0.723496	0.992193	ENSSSCG00000044299;ENSSSCG00000045024	Unknown;Unknown	1.23227386778918;0.326149145575373	0.638141824390823;0.23778569152296	0.658823529411766;-
More active compartments in Berkshire	5	103680000	103700000	-0.656753	-1.4799	0.823143	0.993615	-	-	-	-	-
More active compartments in Berkshire	5	104380000	104400000	4.20305	3.67372	0.529329	0.99821	ENSSSCG00000000952	ZDHHC17	21.4374	18.8217	0.532485
More active compartments in Berkshire	6	5260000	5280000	-1.5608	-2.07225	0.511453	0.989335	-	-	-	-	-
More active compartments in Berkshire	6	76420000	76440000	1.61335	0.972465	0.640886	0.999389	-	-	-	-	-
More active compartments in Berkshire	6	126380000	126400000	-4.5681	-5.11904	0.55094	0.992054	-	-	-	-	-
More active compartments in Berkshire	6	126400000	126420000	-4.61029	-5.12774	0.517448	0.994547	-	-	-	-	-
More active compartments in Berkshire	6	126420000	126440000	-4.456	-4.96327	0.507271	0.993401	-	-	-	-	-
More active compartments in Berkshire	6	126440000	126460000	-4.45604	-5.05705	0.601018	0.991054	-	-	-	-	-
More active compartments in Berkshire	6	126600000	126620000	-4.23508	-4.76609	0.531001	0.990183	-	-	-	-	-
More active compartments in Berkshire	6	126700000	126720000	-4.33441	-4.9677	0.633285	0.994953	-	-	-	-	-
More active compartments in Berkshire	6	126720000	126740000	-4.32124	-4.95013	0.628889	0.989748	-	-	-	-	-
More active compartments in Berkshire	6	126800000	126820000	-4.48269	-5.00393	0.521245	0.987766	-	-	-	-	-
More active compartments in Berkshire	6	146500000	146520000	-4.1831	-4.72257	0.539462	0.989153	-	-	-	-	-
More active compartments in Berkshire	6	146580000	146600000	-3.66745	-4.19955	0.532103	0.986217	-	-	-	-	-
More active compartments in Berkshire	6	146620000	146640000	-3.99931	-4.76471	0.765401	0.986836	-	-	-	-	-
More active compartments in Berkshire	6	146640000	146660000	-4.2015	-4.70551	0.504015	0.989964	-	-	-	-	-
More active compartments in Berkshire	6	146660000	146680000	-4.30793	-5.05012	0.742182	0.9827	-	-	-	-	-
More active compartments in Berkshire	6	146680000	146700000	-4.35885	-4.89526	0.536411	0.98663	-	-	-	-	-
More active compartments in Berkshire	6	146700000	146720000	-4.37394	-5.07483	0.70089	0.985697	-	-	-	-	-
More active compartments in Berkshire	6	146720000	146740000	-4.55805	-5.08331	0.52526	0.991806	ENSSSCG00000003805	PDE4B	13.8282	14.2754	0.492044
More active compartments in Berkshire	6	160960000	160980000	-2.70165	-3.21287	0.511226	0.987005	-	-	-	-	-
More active compartments in Berkshire	6	162120000	162140000	-8.03587	-8.60923	0.573365	0.988392	-	-	-	-	-
More active compartments in Berkshire	6	162240000	162260000	-7.78704	-8.3176	0.530566	0.994143	-	-	-	-	-
More active compartments in Berkshire	6	162320000	162340000	-7.51223	-8.23368	0.721455	0.993742	-	-	-	-	-
More active compartments in Berkshire	6	162360000	162380000	-7.36867	-7.95296	0.584295	0.994412	-	-	-	-	-
More active compartments in Berkshire	6	162400000	162420000	-7.29843	-7.92638	0.627949	0.996049	-	-	-	-	-
More active compartments in Berkshire	6	162480000	162500000	-7.28413	-7.92814	0.644006	0.992676	-	-	-	-	-
More active compartments in Berkshire	6	162500000	162520000	-7.12466	-7.73366	0.608994	0.991228	-	-	-	-	-
More active compartments in Berkshire	6	162520000	162540000	-7.14644	-7.76813	0.621694	0.991174	-	-	-	-	-
More active compartments in Berkshire	6	162540000	162560000	-6.99894	-7.68541	0.686474	0.993589	ENSSSCG00000049367	Unknown	0.162765	0.162765	-
More active compartments in Berkshire	6	162640000	162660000	-6.72993	-7.35707	0.627133	0.998128	-	-	-	-	-
More active compartments in Berkshire	6	162660000	162680000	-6.61811	-7.30142	0.683311	0.993126	-	-	-	-	-
More active compartments in Berkshire	6	162740000	162760000	-6.17684	-6.75717	0.580329	0.99067	-	-	-	-	-
More active compartments in Berkshire	6	162920000	162940000	-5.0361	-5.61691	0.580811	0.988422	-	-	-	-	-
More active compartments in Berkshire	6	165420000	165440000	6.23234	5.58066	0.651679	0.984934	-	-	-	-	-
More active compartments in Berkshire	6	165520000	165540000	6.45059	5.438	1.01258	0.991295	-	-	-	-	-
More active compartments in Berkshire	6	165600000	165620000	6.60234	6.01791	0.58443	0.989311	-	-	-	-	-
More active compartments in Berkshire	6	165640000	165660000	6.92089	6.31324	0.607646	0.985262	-	-	-	-	-
More active compartments in Berkshire	6	166500000	166520000	8.62657	7.88811	0.73846	0.990242	-	-	-	-	-
More active compartments in Berkshire	6	168580000	168600000	6.22969	5.52134	0.708352	0.989512	ENSSSCG00000040559	ZNF691	1.66605	1.35006	0.552383
More active compartments in Berkshire	7	24240000	24260000	2.48818	1.5555	0.93268	0.996761	ENSSSCG00000001440	NOTCH4	3.23824	3.52463	0.478826
More active compartments in Berkshire	7	34460000	34480000	1.24863	0.6517	0.596934	0.996905	-	-	-	-	-
More active compartments in Berkshire	7	44140000	44160000	-6.17306	-6.69434	0.521284	0.993803	-	-	-	-	-
More active compartments in Berkshire	7	44160000	44180000	-5.95093	-6.6041	0.653164	0.990638	-	-	-	-	-
More active compartments in Berkshire	7	44220000	44240000	-6.1981	-6.85293	0.654827	0.991611	-	-	-	-	-
More active compartments in Berkshire	7	44240000	44260000	-6.368	-6.8874	0.519397	0.991671	-	-	-	-	-
More active compartments in Berkshire	7	47200000	47220000	-4.03356	-5.03171	0.998143	0.985796	-	-	-	-	-
More active compartments in Berkshire	7	47220000	47240000	-2.52307	-3.10589	0.582823	0.9922	-	-	-	-	-
More active compartments in Berkshire	7	47280000	47300000	-1.26215	-1.80297	0.540818	0.991614	-	-	-	-	-
More active compartments in Berkshire	7	71240000	71260000	-5.97437	-6.72116	0.746792	0.995409	ENSSSCG00000048926	Unknown	0.0572801	0.0572801	-
More active compartments in Berkshire	7	71300000	71320000	-5.96433	-6.50602	0.541687	0.993794	-	-	-	-	-
More active compartments in Berkshire	7	71440000	71460000	-5.84833	-6.41543	0.567108	0.996669	-	-	-	-	-
More active compartments in Berkshire	7	71460000	71480000	-5.93052	-6.47718	0.546654	0.99784	-	-	-	-	-
More active compartments in Berkshire	7	71720000	71740000	-5.34031	-5.93594	0.595623	0.994927	-	-	-	-	-
More active compartments in Berkshire	7	78680000	78700000	-5.68503	-6.18624	0.501206	0.995816	-	-	-	-	-
More active compartments in Berkshire	7	79080000	79100000	-7.38134	-8.05979	0.678456	0.999267	ENSSSCG00000049588	OR4F15	0	0	-
More active compartments in Berkshire	7	79100000	79120000	-7.62315	-8.35636	0.733211	0.997224	ENSSSCG00000039694	Unknown	0.0202061	0.0202061	-
More active compartments in Berkshire	7	79960000	79980000	-7.66923	-8.2388	0.569571	0.991563	ENSSSCG00000002235	LPCAT4	3.17291	3.65013	0.465029
More active compartments in Berkshire	7	101060000	101080000	-3.98412	-4.69578	0.711667	0.993749	-	-	-	-	-
More active compartments in Berkshire	7	101360000	101380000	-4.80389	-5.34845	0.544562	0.991929	-	-	-	-	-
More active compartments in Berkshire	7	101720000	101740000	-6.06442	-6.63966	0.575232	0.988922	-	-	-	-	-
More active compartments in Berkshire	7	101760000	101780000	-5.78385	-6.44213	0.658274	0.990561	-	-	-	-	-
More active compartments in Berkshire	7	103440000	103460000	-3.52644	-4.06642	0.53998	0.992809	-	-	-	-	-
More active compartments in Berkshire	7	103460000	103480000	-3.46126	-4.03152	0.570255	0.987818	-	-	-	-	-
More active compartments in Berkshire	7	103520000	103540000	-3.27733	-4.13202	0.854686	0.995137	-	-	-	-	-
More active compartments in Berkshire	7	103540000	103560000	-3.16613	-4.10759	0.941455	0.991634	-	-	-	-	-
More active compartments in Berkshire	7	103560000	103580000	-3.22949	-3.9025	0.67301	0.989127	-	-	-	-	-
More active compartments in Berkshire	7	103580000	103600000	-3.15041	-3.83412	0.683709	0.990607	-	-	-	-	-
More active compartments in Berkshire	7	103600000	103620000	-3.10613	-3.82705	0.720922	0.992272	-	-	-	-	-
More active compartments in Berkshire	7	103620000	103640000	-2.92484	-3.98448	1.05965	0.99006	-	-	-	-	-
More active compartments in Berkshire	7	103640000	103660000	-2.93751	-3.7137	0.776189	0.994779	-	-	-	-	-
More active compartments in Berkshire	7	103660000	103680000	-2.91258	-3.56292	0.650336	0.994085	-	-	-	-	-
More active compartments in Berkshire	7	103680000	103700000	-2.80491	-3.47374	0.668831	0.994336	-	-	-	-	-
More active compartments in Berkshire	7	103700000	103720000	-2.74601	-3.39125	0.64524	0.992552	-	-	-	-	-
More active compartments in Berkshire	7	108420000	108440000	-4.13132	-4.65249	0.521172	0.986068	-	-	-	-	-
More active compartments in Berkshire	7	108460000	108480000	-4.11232	-4.68575	0.573424	0.987367	-	-	-	-	-
More active compartments in Berkshire	7	108740000	108760000	-4.69751	-5.28486	0.58735	0.991123	-	-	-	-	-
More active compartments in Berkshire	7	109020000	109040000	-4.46492	-5.01993	0.55501	0.990029	-	-	-	-	-
More active compartments in Berkshire	7	109140000	109160000	-5.05121	-5.61117	0.559962	0.993109	-	-	-	-	-
More active compartments in Berkshire	7	109320000	109340000	-6.42209	-6.9558	0.533715	0.98785	-	-	-	-	-
More active compartments in Berkshire	7	109360000	109380000	-6.47589	-7.05443	0.578534	0.986173	-	-	-	-	-
More active compartments in Berkshire	7	109560000	109580000	-6.72439	-7.28163	0.557238	0.983987	-	-	-	-	-
More active compartments in Berkshire	7	110520000	110540000	-2.55265	-3.2876	0.734949	0.996302	-	-	-	-	-
More active compartments in Berkshire	7	110540000	110560000	-3.04519	-3.59801	0.552825	0.995739	-	-	-	-	-
More active compartments in Berkshire	7	110580000	110600000	-3.14637	-3.84281	0.696438	0.998264	-	-	-	-	-
More active compartments in Berkshire	7	110660000	110680000	-3.54472	-4.22932	0.684603	0.995492	-	-	-	-	-
More active compartments in Berkshire	7	110680000	110700000	-3.27524	-3.92194	0.646705	0.996807	-	-	-	-	-
More active compartments in Berkshire	7	110700000	110720000	-2.88985	-3.65708	0.767233	0.990014	ENSSSCG00000002427	EML5	2.16284	1.13572	0.655692
More active compartments in Berkshire	7	110720000	110740000	-2.67783	-3.38582	0.707988	0.987086	ENSSSCG00000002428	TTC8	1.92686	1.45606	0.569586
More active compartments in Berkshire	7	110760000	110780000	-3.09436	-3.64967	0.555308	0.992201	-	-	-	-	-
More active compartments in Berkshire	7	110780000	110800000	-3.27039	-3.87148	0.601088	0.987327	-	-	-	-	-
More active compartments in Berkshire	7	110800000	110820000	-3.17185	-3.9285	0.756655	0.989686	-	-	-	-	-
More active compartments in Berkshire	7	110820000	110840000	-3.1323	-3.68775	0.555453	0.984773	-	-	-	-	-
More active compartments in Berkshire	7	110840000	110860000	-2.65754	-3.72191	1.06437	0.986921	-	-	-	-	-
More active compartments in Berkshire	7	110860000	110880000	-2.77711	-3.39222	0.615114	0.984226	-	-	-	-	-
More active compartments in Berkshire	7	110880000	110900000	-2.30243	-2.83673	0.534301	0.984251	-	-	-	-	-
More active compartments in Berkshire	7	110900000	110920000	-1.89997	-2.43134	0.531376	0.983295	-	-	-	-	-
More active compartments in Berkshire	7	116920000	116940000	-1.13565	-1.63937	0.503718	0.987475	ENSSSCG00000002498	TCL1A	0	0	-
More active compartments in Berkshire	8	10700000	10720000	1.97219	1.36493	0.607256	0.986355	-	-	-	-	-
More active compartments in Berkshire	8	10720000	10740000	2.07383	1.55151	0.52232	0.987439	-	-	-	-	-
More active compartments in Berkshire	8	73640000	73660000	1.16666	0.578429	0.588232	0.987156	-	-	-	-	-
More active compartments in Berkshire	8	88500000	88520000	0.780357	0.238167	0.54219	0.991399	-	-	-	-	-
More active compartments in Berkshire	8	91520000	91540000	-1.35468	-1.86242	0.507734	0.996432	-	-	-	-	-
More active compartments in Berkshire	8	91740000	91760000	-1.56593	-2.08961	0.523676	0.995942	-	-	-	-	-
More active compartments in Berkshire	8	92200000	92220000	-0.736455	-1.39199	0.655532	0.993726	-	-	-	-	-
More active compartments in Berkshire	8	92420000	92440000	-0.908746	-1.46728	0.55853	0.994761	-	-	-	-	-
More active compartments in Berkshire	8	103660000	103680000	-1.27338	-1.89272	0.619339	0.990595	-	-	-	-	-
More active compartments in Berkshire	8	116100000	116120000	1.53318	0.840527	0.692648	0.989354	-	-	-	-	-
More active compartments in Berkshire	8	116120000	116140000	1.64265	0.894324	0.74833	0.988538	-	-	-	-	-
More active compartments in Berkshire	8	117680000	117700000	-1.49085	-2.22106	0.730207	0.987161	-	-	-	-	-
More active compartments in Berkshire	8	119140000	119160000	1.62104	0.9988	0.622239	0.98971	ENSSSCG00000022361	BANK1	18.6024	14.7918	0.557055
More active compartments in Berkshire	8	119180000	119200000	1.48825	0.949689	0.538561	0.991558	-	-	-	-	-
More active compartments in Berkshire	8	123200000	123220000	-1.80711	-2.32757	0.520457	0.986638	-	-	-	-	-
More active compartments in Berkshire	8	123280000	123300000	-1.60227	-2.41448	0.812202	0.984814	-	-	-	-	-
More active compartments in Berkshire	8	123340000	123360000	-1.4835	-2.40342	0.91992	0.988916	-	-	-	-	-
More active compartments in Berkshire	8	123360000	123380000	-1.81152	-2.44937	0.637855	0.988828	-	-	-	-	-
More active compartments in Berkshire	8	123380000	123400000	-2.04301	-2.68833	0.645325	0.985062	-	-	-	-	-
More active compartments in Berkshire	8	123420000	123440000	-2.20797	-2.83157	0.623604	0.989769	-	-	-	-	-
More active compartments in Berkshire	8	123440000	123460000	-2.12415	-2.71339	0.589245	0.989998	-	-	-	-	-
More active compartments in Berkshire	8	123580000	123600000	-2.16222	-2.74414	0.58192	0.988605	-	-	-	-	-
More active compartments in Berkshire	8	126360000	126380000	-1.54211	-2.09829	0.556187	0.991189	-	-	-	-	-
More active compartments in Berkshire	8	126620000	126640000	-2.45082	-3.04402	0.5932	0.990848	-	-	-	-	-
More active compartments in Berkshire	8	127180000	127200000	-1.38735	-1.90096	0.513603	0.989913	-	-	-	-	-
More active compartments in Berkshire	8	127200000	127220000	-1.40429	-2.05075	0.646463	0.990844	-	-	-	-	-
More active compartments in Berkshire	8	127260000	127280000	-1.89198	-2.45171	0.559728	0.985195	-	-	-	-	-
More active compartments in Berkshire	8	127360000	127380000	-2.13414	-2.70436	0.570215	0.992179	-	-	-	-	-
More active compartments in Berkshire	8	127420000	127440000	-1.67092	-2.41502	0.744102	0.994794	-	-	-	-	-
More active compartments in Berkshire	8	127500000	127520000	-2.26854	-2.82829	0.559743	0.986674	-	-	-	-	-
More active compartments in Berkshire	8	127540000	127560000	-2.19392	-2.80484	0.610919	0.986928	-	-	-	-	-
More active compartments in Berkshire	8	127600000	127620000	-2.13516	-2.84111	0.705944	0.983849	-	-	-	-	-
More active compartments in Berkshire	8	127620000	127640000	-2.09911	-2.69506	0.595957	0.9782	-	-	-	-	-
More active compartments in Berkshire	8	127780000	127800000	-1.22102	-1.77976	0.558742	0.987571	-	-	-	-	-
More active compartments in Berkshire	8	127800000	127820000	-0.89969	-1.72382	0.824127	0.986939	-	-	-	-	-
More active compartments in Berkshire	8	127820000	127840000	-0.758587	-1.38302	0.624433	0.988465	-	-	-	-	-
More active compartments in Berkshire	8	128100000	128120000	-1.60242	-2.14292	0.540508	0.985031	-	-	-	-	-
More active compartments in Berkshire	8	128360000	128380000	-1.72376	-2.35484	0.63108	0.975548	-	-	-	-	-
More active compartments in Berkshire	8	128380000	128400000	-1.7574	-2.38833	0.63093	0.980629	-	-	-	-	-
More active compartments in Berkshire	8	128400000	128420000	-1.86927	-2.38177	0.512498	0.986778	-	-	-	-	-
More active compartments in Berkshire	8	128420000	128440000	-1.68211	-2.39186	0.709749	0.98518	-	-	-	-	-
More active compartments in Berkshire	8	128480000	128500000	-1.4197	-2.09085	0.67115	0.985507	-	-	-	-	-
More active compartments in Berkshire	8	128540000	128560000	-1.32334	-2.07003	0.746692	0.987607	-	-	-	-	-
More active compartments in Berkshire	8	128580000	128600000	-1.42769	-2.15135	0.723661	0.987085	-	-	-	-	-
More active compartments in Berkshire	8	128620000	128640000	-1.32937	-2.18424	0.854862	0.991252	-	-	-	-	-
More active compartments in Berkshire	8	128640000	128660000	-1.48378	-2.2101	0.726316	0.988733	-	-	-	-	-
More active compartments in Berkshire	8	128680000	128700000	-1.40261	-2.03576	0.63315	0.987223	-	-	-	-	-
More active compartments in Berkshire	8	128780000	128800000	-0.918303	-1.66893	0.75063	0.983893	-	-	-	-	-
More active compartments in Berkshire	8	128800000	128820000	-0.734308	-1.30798	0.573671	0.982605	-	-	-	-	-
More active compartments in Berkshire	8	129020000	129040000	-0.652979	-1.35373	0.700754	0.988284	-	-	-	-	-
More active compartments in Berkshire	8	129140000	129160000	-0.695686	-1.2941	0.59841	0.98102	-	-	-	-	-
More active compartments in Berkshire	8	129160000	129180000	-0.692984	-1.32109	0.628109	0.98057	ENSSSCG00000009202	MMRN1	6.05372	4.38979	0.579663
More active compartments in Berkshire	8	129220000	129240000	-1.38213	-2.18528	0.803151	0.990024	-	-	-	-	-
More active compartments in Berkshire	8	129240000	129260000	-1.82617	-2.52071	0.694539	0.987584	ENSSSCG00000009203	SNCA	0.187102	0.187102	-
More active compartments in Berkshire	8	129280000	129300000	-2.05015	-2.896	0.84585	0.986762	-	-	-	-	-
More active compartments in Berkshire	8	129320000	129340000	-1.99117	-2.89874	0.907571	0.985511	-	-	-	-	-
More active compartments in Berkshire	8	129340000	129360000	-1.88175	-3.05379	1.17204	0.985699	-	-	-	-	-
More active compartments in Berkshire	8	129380000	129400000	-1.96956	-3.047	1.07744	0.983354	-	-	-	-	-
More active compartments in Berkshire	8	129400000	129420000	-1.9339	-2.78454	0.850642	0.991172	-	-	-	-	-
More active compartments in Berkshire	8	129440000	129460000	-1.71766	-2.32793	0.610272	0.980385	-	-	-	-	-
More active compartments in Berkshire	8	129520000	129540000	-1.91147	-2.76736	0.855891	0.984329	-	-	-	-	-
More active compartments in Berkshire	8	130880000	130900000	2.39626	1.77819	0.618071	1	-	-	-	-	-
More active compartments in Berkshire	8	133220000	133240000	-1.9674	-2.49782	0.530427	0.986187	-	-	-	-	-
More active compartments in Berkshire	8	133660000	133680000	2.61594	1.90214	0.713795	0.986017	ENSSSCG00000009230	WDFY3	10.9903	9.36913	0.539814
More active compartments in Berkshire	9	2780000	2800000	-3.50609	-4.26747	0.76138	0.996504	ENSSSCG00000043559;ENSSSCG00000044796	Unknown;OR2AG1	0;0.050651733466425	0;0.050651733466425	-;-
More active compartments in Berkshire	9	2820000	2840000	-2.94376	-3.73848	0.794718	0.992584	-	-	-	-	-
More active compartments in Berkshire	9	4280000	4300000	-3.00685	-3.79202	0.785173	0.986395	ENSSSCG00000014690;ENSSSCG00000014691	UBQLNL;UBQLN3	0.0134249164911;0.00447968808658	0.0134249164911;0.00447968808658	-;-
More active compartments in Berkshire	9	4320000	4340000	-3.75394	-4.49513	0.741194	0.983779	ENSSSCG00000034855;ENSSSCG00000037537;ENSSSCG00000044433	Unknown;Unknown;OR52D1	0;0.0139242647155833;0.0138061439661	0;0.0139242647155833;0.0138061439661	-;-;-
More active compartments in Berkshire	9	4340000	4360000	-4.04091	-4.71413	0.673219	0.983413	-	-	-	-	-
More active compartments in Berkshire	9	4440000	4460000	-4.84886	-5.36497	0.516108	0.99311	ENSSSCG00000051672	Unknown	5.02591e-05	5.02591e-05	-
More active compartments in Berkshire	9	4460000	4480000	-4.81468	-5.43899	0.624308	0.993799	ENSSSCG00000014693	OR52P1P	0.0581663	0.0581663	-
More active compartments in Berkshire	9	4480000	4500000	-4.69655	-5.41408	0.717525	0.995678	ENSSSCG00000014695;ENSSSCG00000043379	Unknown;Unknown	0.00595690115063333;0.245903233155	0.00595690115063333;0.245903233155	-;-
More active compartments in Berkshire	9	4540000	4560000	-4.82861	-5.71385	0.885244	0.999472	ENSSSCG00000040034	OR52A1	0	0	-
More active compartments in Berkshire	9	5020000	5040000	-4.43472	-5.32987	0.895147	0.985796	ENSSSCG00000032783	Unknown	0	0	-
More active compartments in Berkshire	9	5300000	5320000	-4.07016	-4.60362	0.533461	0.983895	ENSSSCG00000014757;ENSSSCG00000014758	OR51S1;OR51F2	0;0	0;0	-;-
More active compartments in Berkshire	9	5860000	5880000	-4.06117	-4.95396	0.892785	0.998067	-	-	-	-	-
More active compartments in Berkshire	9	5880000	5900000	-3.74679	-4.95082	1.20403	0.998684	-	-	-	-	-
More active compartments in Berkshire	9	11060000	11080000	2.22152	1.59338	0.62814	0.98782	-	-	-	-	-
More active compartments in Berkshire	9	11080000	11100000	2.11641	1.39847	0.717936	0.985335	-	-	-	-	-
More active compartments in Berkshire	9	11120000	11140000	2.03138	1.45785	0.573523	0.989477	-	-	-	-	-
More active compartments in Berkshire	9	11240000	11260000	2.12618	1.52435	0.601832	0.976525	ENSSSCG00000014876	MYO7A	5.60087	4.17165	0.573124
More active compartments in Berkshire	9	11280000	11300000	1.84291	1.24737	0.595547	0.980651	-	-	-	-	-
More active compartments in Berkshire	9	11420000	11440000	-2.01817	-2.53527	0.517106	0.983716	-	-	-	-	-
More active compartments in Berkshire	9	11500000	11520000	-2.13696	-2.64611	0.509148	0.987757	ENSSSCG00000050669	L1TD1	0.101079	0.101079	-
More active compartments in Berkshire	9	11960000	11980000	1.02423	0.502581	0.521652	0.986355	-	-	-	-	-
More active compartments in Berkshire	9	12400000	12420000	3.35184	2.38846	0.963375	0.998806	-	-	-	-	-
More active compartments in Berkshire	9	12420000	12440000	4.06292	2.51641	1.54652	0.999922	ENSSSCG00000014884	Unknown	4.59953	4.61203	0.499321
More active compartments in Berkshire	9	12440000	12460000	2.90358	2.19763	0.705952	0.999986	ENSSSCG00000031979	KCTD14	-	-	-
More active compartments in Berkshire	9	13700000	13720000	-0.66727	-1.22348	0.556214	0.986971	-	-	-	-	-
More active compartments in Berkshire	9	16240000	16260000	-4.33193	-4.8433	0.511374	0.986184	-	-	-	-	-
More active compartments in Berkshire	9	20220000	20240000	2.62988	2.05645	0.573435	0.997088	-	-	-	-	-
More active compartments in Berkshire	9	20260000	20280000	2.58756	2.02757	0.559988	0.991301	-	-	-	-	-
More active compartments in Berkshire	9	20280000	20300000	2.58287	2.02871	0.554161	0.9922	ENSSSCG00000014918;ENSSSCG00000047749	Unknown;Unknown	0.236652057404667;0.82943494112165	0.321542337634667;0.66452900566395	-;0.555190734626666
More active compartments in Berkshire	9	20300000	20320000	2.12059	1.50065	0.619938	0.989641	-	-	-	-	-
More active compartments in Berkshire	9	20360000	20380000	2.02171	1.51346	0.508245	0.988564	-	-	-	-	-
More active compartments in Berkshire	9	20380000	20400000	2.21293	1.46548	0.747454	0.988828	-	-	-	-	-
More active compartments in Berkshire	9	20400000	20420000	2.19706	1.47938	0.717688	0.988309	-	-	-	-	-
More active compartments in Berkshire	9	20420000	20440000	1.9927	1.4679	0.524802	0.984728	-	-	-	-	-
More active compartments in Berkshire	9	20440000	20460000	2.21675	1.32959	0.887157	0.98762	-	-	-	-	-
More active compartments in Berkshire	9	20460000	20480000	1.92672	1.32467	0.602041	0.986915	-	-	-	-	-
More active compartments in Berkshire	9	20480000	20500000	2.27939	1.47506	0.804338	0.99004	-	-	-	-	-
More active compartments in Berkshire	9	20540000	20560000	1.562	0.963286	0.598713	0.993401	-	-	-	-	-
More active compartments in Berkshire	9	20560000	20580000	1.43496	0.902914	0.532048	0.991947	-	-	-	-	-
More active compartments in Berkshire	9	20580000	20600000	1.64144	1.0452	0.596233	0.988086	-	-	-	-	-
More active compartments in Berkshire	9	21120000	21140000	-1.07672	-1.64174	0.565023	0.99599	-	-	-	-	-
More active compartments in Berkshire	9	21160000	21180000	-1.27433	-1.98041	0.706086	0.995228	-	-	-	-	-
More active compartments in Berkshire	9	21200000	21220000	-0.903381	-1.62266	0.719277	0.986569	-	-	-	-	-
More active compartments in Berkshire	9	21220000	21240000	-0.760798	-1.56741	0.80661	0.994562	-	-	-	-	-
More active compartments in Berkshire	9	21240000	21260000	-1.09133	-1.73495	0.643614	0.990261	-	-	-	-	-
More active compartments in Berkshire	9	21260000	21280000	-1.21253	-1.91667	0.704143	0.987263	-	-	-	-	-
More active compartments in Berkshire	9	21320000	21340000	-1.28726	-1.92467	0.637411	0.991061	-	-	-	-	-
More active compartments in Berkshire	9	21380000	21400000	-1.50194	-2.00394	0.501992	0.996568	-	-	-	-	-
More active compartments in Berkshire	9	21400000	21420000	-1.2649	-1.89826	0.633358	0.994212	-	-	-	-	-
More active compartments in Berkshire	9	26880000	26900000	1.77272	1.25983	0.51289	0.98519	-	-	-	-	-
More active compartments in Berkshire	9	26900000	26920000	2.04209	1.4297	0.61239	0.984871	-	-	-	-	-
More active compartments in Berkshire	9	26920000	26940000	2.0149	1.41136	0.603543	0.982704	-	-	-	-	-
More active compartments in Berkshire	9	28900000	28920000	-2.66312	-3.2054	0.542279	0.989905	-	-	-	-	-
More active compartments in Berkshire	9	28920000	28940000	-2.67671	-3.18078	0.504066	0.990307	-	-	-	-	-
More active compartments in Berkshire	9	28940000	28960000	-2.68879	-3.26139	0.572597	0.98337	-	-	-	-	-
More active compartments in Berkshire	9	28960000	28980000	-2.87288	-3.51796	0.645076	0.988515	-	-	-	-	-
More active compartments in Berkshire	9	29000000	29020000	-2.86073	-3.41236	0.55163	0.989795	-	-	-	-	-
More active compartments in Berkshire	9	29020000	29040000	-2.97637	-3.54869	0.57232	0.991926	-	-	-	-	-
More active compartments in Berkshire	9	29060000	29080000	-2.98523	-3.52869	0.543457	0.988367	-	-	-	-	-
More active compartments in Berkshire	9	29080000	29100000	-2.92437	-3.46399	0.539618	0.987544	-	-	-	-	-
More active compartments in Berkshire	9	29100000	29120000	-2.76175	-3.312	0.550245	0.991102	-	-	-	-	-
More active compartments in Berkshire	9	29120000	29140000	-2.88199	-3.5059	0.623907	0.992321	-	-	-	-	-
More active compartments in Berkshire	9	29140000	29160000	-2.79556	-3.34261	0.547053	0.987803	-	-	-	-	-
More active compartments in Berkshire	9	29180000	29200000	-2.96496	-3.67797	0.713007	0.991142	-	-	-	-	-
More active compartments in Berkshire	9	29200000	29220000	-3.06583	-3.65583	0.590007	0.990271	-	-	-	-	-
More active compartments in Berkshire	9	29300000	29320000	-3.15993	-3.74699	0.587058	0.993788	-	-	-	-	-
More active compartments in Berkshire	9	29320000	29340000	-3.12327	-3.66735	0.544087	0.994414	-	-	-	-	-
More active compartments in Berkshire	9	29380000	29400000	-2.66078	-3.16283	0.50205	0.993973	-	-	-	-	-
More active compartments in Berkshire	9	29400000	29420000	-2.78483	-3.29976	0.514928	0.987819	-	-	-	-	-
More active compartments in Berkshire	9	29440000	29460000	-2.89749	-3.48397	0.586475	0.99312	-	-	-	-	-
More active compartments in Berkshire	9	29480000	29500000	-2.99704	-3.5296	0.532556	0.986263	-	-	-	-	-
More active compartments in Berkshire	9	29780000	29800000	-3.21256	-3.81118	0.598614	0.9964	-	-	-	-	-
More active compartments in Berkshire	9	29820000	29840000	-3.09678	-3.657	0.56022	0.99028	-	-	-	-	-
More active compartments in Berkshire	9	29880000	29900000	-2.97917	-3.59221	0.613045	0.991957	-	-	-	-	-
More active compartments in Berkshire	9	29900000	29920000	-2.9554	-3.58887	0.633472	0.996231	-	-	-	-	-
More active compartments in Berkshire	9	29940000	29960000	-2.86863	-3.37871	0.510081	0.995067	-	-	-	-	-
More active compartments in Berkshire	9	29960000	29980000	-2.69484	-3.20043	0.505595	0.997993	-	-	-	-	-
More active compartments in Berkshire	9	29980000	30000000	-2.36973	-3.08351	0.71378	0.990929	-	-	-	-	-
More active compartments in Berkshire	9	30020000	30040000	-2.33977	-3.06202	0.722251	0.992157	-	-	-	-	-
More active compartments in Berkshire	9	30040000	30060000	-2.36194	-3.19232	0.830382	0.994188	-	-	-	-	-
More active compartments in Berkshire	9	30060000	30080000	-2.5137	-3.13796	0.624261	0.990529	-	-	-	-	-
More active compartments in Berkshire	9	30080000	30100000	-2.67399	-3.2179	0.543907	0.994041	-	-	-	-	-
More active compartments in Berkshire	9	30100000	30120000	-2.67548	-3.36152	0.686042	0.986922	-	-	-	-	-
More active compartments in Berkshire	9	30120000	30140000	-2.59722	-3.21131	0.614083	0.989268	-	-	-	-	-
More active compartments in Berkshire	9	30140000	30160000	-2.70525	-3.26475	0.559506	0.994544	-	-	-	-	-
More active compartments in Berkshire	9	30300000	30320000	-2.21603	-2.74937	0.533336	0.997728	-	-	-	-	-
More active compartments in Berkshire	9	30400000	30420000	-2.34501	-3.00228	0.657272	0.995383	-	-	-	-	-
More active compartments in Berkshire	9	30440000	30460000	-2.29898	-2.89511	0.596136	0.995155	-	-	-	-	-
More active compartments in Berkshire	9	30460000	30480000	-2.20633	-2.95987	0.753535	0.995384	-	-	-	-	-
More active compartments in Berkshire	9	30480000	30500000	-2.21891	-2.90717	0.688262	0.996151	ENSSSCG00000045634	Unknown	-	-	-
More active compartments in Berkshire	9	30520000	30540000	-2.26205	-2.83276	0.57071	0.997276	-	-	-	-	-
More active compartments in Berkshire	9	30540000	30560000	-2.21443	-2.85496	0.64053	0.99706	-	-	-	-	-
More active compartments in Berkshire	9	30560000	30580000	-2.31746	-2.93911	0.621646	0.998119	-	-	-	-	-
More active compartments in Berkshire	9	30580000	30600000	-2.29463	-2.88859	0.593966	0.996417	-	-	-	-	-
More active compartments in Berkshire	9	30680000	30700000	-2.83974	-3.42278	0.583039	0.997045	-	-	-	-	-
More active compartments in Berkshire	9	30740000	30760000	-2.89691	-3.50324	0.606334	0.988986	-	-	-	-	-
More active compartments in Berkshire	9	31220000	31240000	-3.21316	-3.80662	0.593452	0.995649	-	-	-	-	-
More active compartments in Berkshire	9	50800000	50820000	-5.55874	-6.25592	0.697182	0.99505	ENSSSCG00000044352	Unknown	0	0	-
More active compartments in Berkshire	9	50820000	50840000	-5.3647	-6.35383	0.989131	0.994933	ENSSSCG00000043498;ENSSSCG00000050901	Unknown;Unknown	0.01680108703265;0	0.01680108703265;0	-;-
More active compartments in Berkshire	9	50840000	50860000	-5.20221	-6.62118	1.41897	0.997271	ENSSSCG00000049068	Unknown	0.00872171	0.00872171	-
More active compartments in Berkshire	9	50860000	50880000	-5.1787	-6.33885	1.16015	0.996421	-	-	-	-	-
More active compartments in Berkshire	9	50880000	50900000	-5.54207	-6.19619	0.654125	0.994372	-	-	-	-	-
More active compartments in Berkshire	9	63360000	63380000	-7.01736	-8.1748	1.15744	0.995912	-	-	-	-	-
More active compartments in Berkshire	9	63380000	63400000	-6.40041	-7.48392	1.08351	0.996868	-	-	-	-	-
More active compartments in Berkshire	9	79260000	79280000	-3.5815	-4.12231	0.540812	0.996677	-	-	-	-	-
More active compartments in Berkshire	9	94760000	94780000	-3.49689	-4.03355	0.536663	0.996976	-	-	-	-	-
More active compartments in Berkshire	9	94800000	94820000	-3.26676	-3.94047	0.673712	0.998173	-	-	-	-	-
More active compartments in Berkshire	9	94820000	94840000	-3.26301	-3.90571	0.642699	0.998378	-	-	-	-	-
More active compartments in Berkshire	9	94880000	94900000	-2.83131	-3.40865	0.577345	0.994002	-	-	-	-	-
More active compartments in Berkshire	9	94920000	94940000	-2.88661	-3.40044	0.513828	0.994884	-	-	-	-	-
More active compartments in Berkshire	9	101860000	101880000	-2.34387	-2.86597	0.5221	0.99301	-	-	-	-	-
More active compartments in Berkshire	9	131920000	131940000	1.38421	0.873093	0.51112	0.984155	-	-	-	-	-
More active compartments in Berkshire	9	131980000	132000000	-0.588375	-1.13413	0.545755	0.975127	-	-	-	-	-
More active compartments in Berkshire	9	132000000	132020000	-1.06575	-1.64696	0.581208	0.983042	-	-	-	-	-
More active compartments in Berkshire	9	132020000	132040000	-1.37383	-1.96282	0.588993	0.981046	-	-	-	-	-
More active compartments in Berkshire	9	132040000	132060000	-1.60343	-2.18157	0.578141	0.983618	-	-	-	-	-
More active compartments in Berkshire	9	132060000	132080000	-1.73731	-2.41465	0.677345	0.984182	-	-	-	-	-
More active compartments in Berkshire	9	132080000	132100000	-1.82066	-2.48375	0.663084	0.984558	-	-	-	-	-
More active compartments in Berkshire	9	132100000	132120000	-1.67239	-2.39797	0.725579	0.986278	-	-	-	-	-
More active compartments in Berkshire	9	132120000	132140000	-1.71962	-2.34881	0.629198	0.977628	-	-	-	-	-
More active compartments in Berkshire	9	132140000	132160000	-1.67477	-2.4079	0.733129	0.977739	-	-	-	-	-
More active compartments in Berkshire	9	132160000	132180000	-1.56744	-2.38388	0.816445	0.983543	-	-	-	-	-
More active compartments in Berkshire	9	132180000	132200000	-1.39598	-2.38507	0.989088	0.986539	-	-	-	-	-
More active compartments in Berkshire	9	132200000	132220000	-1.25861	-2.38015	1.12154	0.983257	-	-	-	-	-
More active compartments in Berkshire	9	132220000	132240000	-1.26779	-2.08062	0.812832	0.976104	-	-	-	-	-
More active compartments in Berkshire	9	132240000	132260000	-0.846687	-1.62668	0.779989	0.983189	-	-	-	-	-
More active compartments in Berkshire	9	132260000	132280000	-0.879097	-1.83077	0.951671	0.981046	-	-	-	-	-
More active compartments in Berkshire	9	132280000	132300000	-0.661602	-1.7203	1.05869	0.981803	-	-	-	-	-
More active compartments in Berkshire	9	132300000	132320000	-0.717676	-1.8015	1.08382	0.984465	-	-	-	-	-
More active compartments in Berkshire	9	132320000	132340000	-0.986204	-1.83675	0.850541	0.986326	-	-	-	-	-
More active compartments in Berkshire	9	132340000	132360000	-0.88846	-1.82685	0.938391	0.980024	-	-	-	-	-
More active compartments in Berkshire	9	132360000	132380000	-1.06406	-1.75333	0.689265	0.986661	-	-	-	-	-
More active compartments in Berkshire	9	132380000	132400000	-0.85664	-1.75234	0.895701	0.975111	-	-	-	-	-
More active compartments in Berkshire	9	132400000	132420000	-0.674852	-1.41795	0.743094	0.982915	-	-	-	-	-
More active compartments in Berkshire	9	132420000	132440000	-0.632529	-1.24938	0.61685	0.984199	-	-	-	-	-
More active compartments in Berkshire	9	132440000	132460000	-0.639784	-1.25595	0.616167	0.982212	-	-	-	-	-
More active compartments in Berkshire	9	132460000	132480000	-0.674924	-1.22654	0.55162	0.981526	-	-	-	-	-
More active compartments in Berkshire	9	132860000	132880000	-2.86617	-3.41072	0.544546	0.985863	-	-	-	-	-
More active compartments in Berkshire	9	135260000	135280000	-1.38686	-2.15794	0.771074	0.979879	-	-	-	-	-
More active compartments in Berkshire	9	135300000	135320000	-1.57533	-2.38213	0.80679	0.986528	-	-	-	-	-
More active compartments in Berkshire	9	135320000	135340000	-1.49986	-2.38676	0.886899	0.981117	-	-	-	-	-
More active compartments in Berkshire	9	135360000	135380000	-1.8287	-2.51854	0.689839	0.98021	-	-	-	-	-
More active compartments in Berkshire	9	135380000	135400000	-1.86659	-2.78318	0.916586	0.986624	-	-	-	-	-
More active compartments in Berkshire	9	135400000	135420000	-2.01869	-2.75392	0.735235	0.978064	-	-	-	-	-
More active compartments in Berkshire	9	135420000	135440000	-1.94734	-2.72203	0.77469	0.983542	-	-	-	-	-
More active compartments in Berkshire	9	135460000	135480000	-2.41895	-2.94674	0.527783	0.98259	-	-	-	-	-
More active compartments in Berkshire	9	135480000	135500000	-2.25655	-3.08139	0.82484	0.980442	-	-	-	-	-
More active compartments in Berkshire	9	135520000	135540000	-2.57847	-3.28375	0.705284	0.985062	-	-	-	-	-
More active compartments in Berkshire	9	135540000	135560000	-2.69935	-3.23762	0.538263	0.9837	-	-	-	-	-
More active compartments in Berkshire	9	135580000	135600000	-2.77254	-3.56873	0.796191	0.98274	-	-	-	-	-
More active compartments in Berkshire	9	135600000	135620000	-2.84381	-3.57756	0.733754	0.983839	-	-	-	-	-
More active compartments in Berkshire	9	135680000	135700000	-2.86186	-3.50152	0.639657	0.985546	-	-	-	-	-
More active compartments in Berkshire	9	135700000	135720000	-2.70468	-3.50975	0.805068	0.991028	-	-	-	-	-
More active compartments in Berkshire	9	135720000	135740000	-2.64912	-3.25145	0.602328	0.982874	-	-	-	-	-
More active compartments in Berkshire	9	135740000	135760000	-2.61575	-3.24896	0.633215	0.986436	-	-	-	-	-
More active compartments in Berkshire	9	135840000	135860000	-1.97744	-2.82285	0.845405	0.98542	-	-	-	-	-
More active compartments in Berkshire	9	135860000	135880000	-2.10769	-2.85633	0.748642	0.985722	-	-	-	-	-
More active compartments in Berkshire	9	135880000	135900000	-2.04144	-2.68659	0.645154	0.985685	-	-	-	-	-
More active compartments in Berkshire	9	135900000	135920000	-1.83333	-2.677	0.843673	0.988618	-	-	-	-	-
More active compartments in Berkshire	9	135920000	135940000	-1.75456	-2.63735	0.882785	0.979752	-	-	-	-	-
More active compartments in Berkshire	9	136020000	136040000	-1.76908	-2.27579	0.506703	0.986506	-	-	-	-	-
More active compartments in Berkshire	9	136180000	136200000	-1.46522	-1.97945	0.514225	0.989795	ENSSSCG00000015627;ENSSSCG00000015628	ZPBP;SPATA48	1.248860113;0.03495514576057	1.248860113;0.03495514576057	0.5;-
More active compartments in Berkshire	10	66180000	66200000	1.99578	1.43154	0.564238	0.989241	-	-	-	-	-
More active compartments in Berkshire	10	66320000	66340000	2.19115	1.66243	0.528713	0.987156	-	-	-	-	-
More active compartments in Berkshire	11	20180000	20200000	-0.737688	-1.25962	0.521936	0.980498	-	-	-	-	-
More active compartments in Berkshire	11	28680000	28700000	-3.1582	-3.69543	0.537229	0.99488	-	-	-	-	-
More active compartments in Berkshire	11	57180000	57200000	-3.54617	-4.09062	0.544449	0.992274	-	-	-	-	-
More active compartments in Berkshire	11	57420000	57440000	-3.30899	-3.83261	0.523617	0.992516	ENSSSCG00000033995	COX5B	0	0	-
More active compartments in Berkshire	11	62180000	62200000	-3.50747	-4.11787	0.610403	0.986568	-	-	-	-	-
More active compartments in Berkshire	11	62200000	62220000	-3.42708	-4.12276	0.695676	0.987262	-	-	-	-	-
More active compartments in Berkshire	11	62220000	62240000	-3.31157	-3.94176	0.630184	0.988219	-	-	-	-	-
More active compartments in Berkshire	11	62240000	62260000	-3.21355	-3.78605	0.572499	0.986918	-	-	-	-	-
More active compartments in Berkshire	11	62260000	62280000	-3.19702	-3.78546	0.588434	0.988554	-	-	-	-	-
More active compartments in Berkshire	11	62280000	62300000	-2.93369	-3.61729	0.683596	0.988448	-	-	-	-	-
More active compartments in Berkshire	11	62320000	62340000	-2.45471	-3.24259	0.787878	0.98837	-	-	-	-	-
More active compartments in Berkshire	11	62340000	62360000	-2.24985	-2.97002	0.720172	0.985344	-	-	-	-	-
More active compartments in Berkshire	11	62400000	62420000	-2.62001	-3.19486	0.57485	0.98596	-	-	-	-	-
More active compartments in Berkshire	11	62520000	62540000	-2.82794	-3.38285	0.554906	0.984327	-	-	-	-	-
More active compartments in Berkshire	11	62540000	62560000	-2.84977	-3.37268	0.522907	0.987398	-	-	-	-	-
More active compartments in Berkshire	11	62580000	62600000	-2.49587	-3.12779	0.631923	0.989446	-	-	-	-	-
More active compartments in Berkshire	11	62600000	62620000	-2.45201	-3.10367	0.65166	0.987489	-	-	-	-	-
More active compartments in Berkshire	11	62640000	62660000	-2.52009	-3.2061	0.686017	0.989219	-	-	-	-	-
More active compartments in Berkshire	11	62660000	62680000	-2.87724	-3.57062	0.693383	0.986652	-	-	-	-	-
More active compartments in Berkshire	11	62680000	62700000	-2.89131	-3.65272	0.76141	0.99004	-	-	-	-	-
More active compartments in Berkshire	11	62700000	62720000	-3.03485	-3.7565	0.721651	0.985296	-	-	-	-	-
More active compartments in Berkshire	11	62720000	62740000	-3.20619	-3.9547	0.748513	0.985312	-	-	-	-	-
More active compartments in Berkshire	11	62740000	62760000	-3.34455	-4.06299	0.718438	0.987179	-	-	-	-	-
More active compartments in Berkshire	11	62760000	62780000	-3.59501	-4.176	0.580986	0.986813	-	-	-	-	-
More active compartments in Berkshire	11	62780000	62800000	-3.64507	-4.14609	0.501014	0.99158	-	-	-	-	-
More active compartments in Berkshire	11	62820000	62840000	-3.80733	-4.32445	0.517116	0.989785	-	-	-	-	-
More active compartments in Berkshire	11	62860000	62880000	-3.99635	-4.51226	0.515904	0.992548	-	-	-	-	-
More active compartments in Berkshire	11	62880000	62900000	-3.86688	-4.39718	0.530302	0.991767	-	-	-	-	-
More active compartments in Berkshire	11	62920000	62940000	-3.74298	-4.31018	0.567197	0.990112	-	-	-	-	-
More active compartments in Berkshire	11	63060000	63080000	-3.57433	-4.11489	0.540558	0.989996	-	-	-	-	-
More active compartments in Berkshire	11	64620000	64640000	-2.47211	-3.09036	0.618255	0.984178	-	-	-	-	-
More active compartments in Berkshire	11	64800000	64820000	-2.1534	-2.69903	0.545629	0.997145	-	-	-	-	-
More active compartments in Berkshire	11	64820000	64840000	-1.78324	-2.55285	0.769613	0.996003	-	-	-	-	-
More active compartments in Berkshire	11	65820000	65840000	-4.59646	-5.38648	0.790022	0.988192	-	-	-	-	-
More active compartments in Berkshire	11	65840000	65860000	-4.59522	-5.33906	0.743841	0.986413	-	-	-	-	-
More active compartments in Berkshire	11	65880000	65900000	-4.60725	-5.20638	0.599132	0.988428	-	-	-	-	-
More active compartments in Berkshire	11	65900000	65920000	-4.38601	-5.28131	0.895303	0.983377	-	-	-	-	-
More active compartments in Berkshire	11	65920000	65940000	-4.59485	-5.1303	0.535455	0.994868	-	-	-	-	-
More active compartments in Berkshire	11	65940000	65960000	-4.35368	-5.30004	0.946361	0.989236	-	-	-	-	-
More active compartments in Berkshire	11	65960000	65980000	-4.40328	-5.25646	0.853184	0.985453	-	-	-	-	-
More active compartments in Berkshire	11	65980000	66000000	-4.30128	-5.20862	0.907333	0.982686	-	-	-	-	-
More active compartments in Berkshire	11	66000000	66020000	-4.47033	-5.02842	0.558085	0.985381	-	-	-	-	-
More active compartments in Berkshire	11	66020000	66040000	-4.3099	-4.95605	0.646151	0.98754	-	-	-	-	-
More active compartments in Berkshire	11	66040000	66060000	-4.17731	-4.76334	0.586027	0.990801	-	-	-	-	-
More active compartments in Berkshire	11	66060000	66080000	-4.02344	-4.61322	0.589773	0.990113	-	-	-	-	-
More active compartments in Berkshire	11	66080000	66100000	-3.95047	-4.47055	0.520081	0.987215	-	-	-	-	-
More active compartments in Berkshire	11	66140000	66160000	-2.95613	-3.55517	0.599045	0.986062	-	-	-	-	-
More active compartments in Berkshire	11	71260000	71280000	-2.47455	-2.99536	0.520806	0.991476	-	-	-	-	-
More active compartments in Berkshire	11	71280000	71300000	-2.46067	-3.21219	0.751519	0.99243	-	-	-	-	-
More active compartments in Berkshire	11	71300000	71320000	-2.49188	-3.03567	0.543794	0.993912	ENSSSCG00000048829	Unknown	0.178443	0.178443	-
More active compartments in Berkshire	11	71320000	71340000	-2.24724	-3.41741	1.17016	0.986571	-	-	-	-	-
More active compartments in Berkshire	11	71340000	71360000	-2.56899	-3.62199	1.053	0.985443	ENSSSCG00000026317	SLC10A2	0.0462878	0.0462878	-
More active compartments in Berkshire	11	71360000	71380000	-3.25405	-3.85243	0.598376	0.989188	-	-	-	-	-
More active compartments in Berkshire	11	71460000	71480000	-4.29717	-4.88654	0.589361	0.986134	-	-	-	-	-
More active compartments in Berkshire	11	71540000	71560000	-4.63675	-5.18929	0.552545	0.989526	-	-	-	-	-
More active compartments in Berkshire	11	75880000	75900000	-1.39912	-2.04211	0.642996	0.98906	-	-	-	-	-
More active compartments in Berkshire	11	76980000	77000000	4.10613	3.59516	0.510969	0.992082	ENSSSCG00000009545;ENSSSCG00000044051	COL4A2;Unknown	36.5329475873418;51.9080880412981	41.3262081802749;48.5077286380186	0.469218388347034;0.516931393458357
More active compartments in Berkshire	12	2880000	2900000	1.17957	0.651113	0.528457	0.997235	-	-	-	-	-
More active compartments in Berkshire	12	4780000	4800000	4.30099	3.72173	0.579269	0.985196	-	-	-	-	-
More active compartments in Berkshire	12	6400000	6420000	4.32878	3.82855	0.500225	0.990175	-	-	-	-	-
More active compartments in Berkshire	12	16340000	16360000	-0.687515	-1.28054	0.593022	0.992745	ENSSSCG00000017304	EFCAB3	0.0308086	0.0308086	-
More active compartments in Berkshire	12	17320000	17340000	-0.595956	-1.16032	0.564363	0.990724	-	-	-	-	-
More active compartments in Berkshire	12	18060000	18080000	1.96702	1.44787	0.519152	0.991015	-	-	-	-	-
More active compartments in Berkshire	12	21140000	21160000	-0.657071	-1.63221	0.975142	0.983217	ENSSSCG00000017437	KRT36	0.0861418	0.0861418	-
More active compartments in Berkshire	12	21160000	21180000	-0.989025	-1.82519	0.836165	0.985405	ENSSSCG00000017438;ENSSSCG00000017439	KRT35;KRT32	0.00835201096877;0.02433661226102	0.00835201096877;0.02433661226102	-;-
More active compartments in Berkshire	12	21180000	21200000	-1.13724	-2.08803	0.950782	0.982509	ENSSSCG00000034177	Unknown	0.00579949	0.00579949	-
More active compartments in Berkshire	12	21200000	21220000	-1.17549	-2.46954	1.29406	0.98625	ENSSSCG00000021668	KRT31	0.0143851	0.0143851	-
More active compartments in Berkshire	12	21220000	21240000	-1.47603	-2.40241	0.926383	0.992635	ENSSSCG00000017441;ENSSSCG00000021755	KRT33A;KRT31	0.0187739264708833;0.0188920788870833	0.0187739264708833;0.0188920788870833	-;-
More active compartments in Berkshire	12	21240000	21260000	-1.71616	-2.67236	0.956204	0.994144	ENSSSCG00000030350	KRT33A	0.055601	0.055601	-
More active compartments in Berkshire	12	21260000	21280000	-1.64955	-2.67974	1.03019	0.987154	ENSSSCG00000041928;ENSSSCG00000047892	KRTAP17-1;KRTAP16-1	0;0.04487480165746	0;0.04487480165746	-;-
More active compartments in Berkshire	12	21280000	21300000	-1.84905	-2.67832	0.829276	0.98149	-	-	-	-	-
More active compartments in Berkshire	12	21300000	21320000	-1.80442	-2.86225	1.05783	0.988974	ENSSSCG00000037569;ENSSSCG00000039008;ENSSSCG00000046804	KRTAP9-1;KRTAP9-1;KRTAP9-1	0;0;0.0170495932820833	0;0;0.0170495932820833	-;-;-
More active compartments in Berkshire	12	21320000	21340000	-1.79821	-2.96494	1.16673	0.987226	-	-	-	-	-
More active compartments in Berkshire	12	21340000	21360000	-1.72476	-2.5804	0.855641	0.982038	ENSSSCG00000033085;ENSSSCG00000046207	Unknown;Unknown	0.0066918056253;0.183875525588167	0.0066918056253;0.183875525588167	-;-
More active compartments in Berkshire	12	21360000	21380000	-1.69608	-2.76526	1.06918	0.983005	-	-	-	-	-
More active compartments in Berkshire	12	21380000	21400000	-1.88578	-2.92886	1.04309	0.990445	ENSSSCG00000032172	KRTAP4-6	0.10677	0.10677	-
More active compartments in Berkshire	12	21400000	21420000	-1.87182	-2.86587	0.994046	0.983463	ENSSSCG00000025789;ENSSSCG00000039030	Unknown;Unknown	0;0.0467701499943	0;0.0467701499943	-;-
More active compartments in Berkshire	12	21420000	21440000	-1.85767	-2.83256	0.974887	0.987847	ENSSSCG00000017451;ENSSSCG00000027632;ENSSSCG00000038114;ENSSSCG00000049072	KRTAP10-11;KRTAP10-11;KRTAP1-1;KRTAP10-11	0;0;0;0.028293367358	0;0;0;0.028293367358	-;-;-;-
More active compartments in Berkshire	12	21440000	21460000	-1.62727	-2.65696	1.02969	0.987138	-	-	-	-	-
More active compartments in Berkshire	12	21480000	21500000	-1.69199	-2.58898	0.896998	0.986432	ENSSSCG00000017458;ENSSSCG00000036987	KRT39;KRT40	0;0	0;0	-;-
More active compartments in Berkshire	12	21500000	21520000	-1.39577	-2.33595	0.940183	0.985089	-	-	-	-	-
More active compartments in Berkshire	12	21520000	21540000	-1.26141	-2.15679	0.895388	0.986901	ENSSSCG00000024067	KRT23	0.672715	0.410215	0.621199
More active compartments in Berkshire	12	21540000	21560000	-1.11755	-1.95731	0.839752	0.988792	-	-	-	-	-
More active compartments in Berkshire	12	21560000	21580000	-0.875859	-1.51916	0.643296	0.984744	-	-	-	-	-
More active compartments in Berkshire	12	21580000	21600000	-0.756782	-1.38121	0.624429	0.993221	ENSSSCG00000017459;ENSSSCG00000017460	KRT20;KRT12	11.5722148772749;0.610723540574	6.22868242469504;0.305361770287	0.650091660042006;0.666666666666667
More active compartments in Berkshire	12	28460000	28480000	-5.29422	-5.80406	0.509837	0.99544	-	-	-	-	-
More active compartments in Berkshire	12	29260000	29280000	-4.85095	-5.35273	0.501787	0.997443	-	-	-	-	-
More active compartments in Berkshire	12	29340000	29360000	-4.74847	-5.25294	0.504468	0.995128	-	-	-	-	-
More active compartments in Berkshire	12	29500000	29520000	-4.85327	-5.64684	0.793575	0.997308	-	-	-	-	-
More active compartments in Berkshire	12	29520000	29540000	-5.18079	-5.81891	0.63812	0.998853	-	-	-	-	-
More active compartments in Berkshire	12	58540000	58560000	-6.18326	-6.86797	0.684701	0.988262	-	-	-	-	-
More active compartments in Berkshire	12	58560000	58580000	-6.51699	-8.03918	1.52219	0.998042	-	-	-	-	-
More active compartments in Berkshire	13	1620000	1640000	1.31432	0.772144	0.542177	0.989007	-	-	-	-	-
More active compartments in Berkshire	13	1720000	1740000	2.2271	1.47327	0.753829	0.98564	ENSSSCG00000029094	PIK3R4	19.747	16.573	0.543694
More active compartments in Berkshire	13	1760000	1780000	1.88139	1.29682	0.58457	0.989977	-	-	-	-	-
More active compartments in Berkshire	13	2340000	2360000	1.81599	1.23584	0.580152	0.99093	-	-	-	-	-
More active compartments in Berkshire	13	11120000	11140000	1.20398	0.680033	0.523945	0.989338	-	-	-	-	-
More active compartments in Berkshire	13	15920000	15940000	-2.15888	-2.76978	0.610904	0.992292	-	-	-	-	-
More active compartments in Berkshire	13	17740000	17760000	2.31242	1.75128	0.561136	0.998309	-	-	-	-	-
More active compartments in Berkshire	13	20600000	20620000	-3.35857	-3.9724	0.613828	0.995263	-	-	-	-	-
More active compartments in Berkshire	13	30960000	30980000	5.75792	4.87721	0.880714	0.999261	-	-	-	-	-
More active compartments in Berkshire	13	31000000	31020000	5.38454	4.54692	0.837615	0.999222	ENSSSCG00000047135	CAMP	3.65768	3.13516	0.538462
More active compartments in Berkshire	13	40280000	40300000	1.98324	1.40654	0.576705	0.993839	-	-	-	-	-
More active compartments in Berkshire	13	40360000	40380000	1.28844	0.777094	0.511349	0.987933	-	-	-	-	-
More active compartments in Berkshire	13	40800000	40820000	-1.23816	-1.90496	0.666798	0.990796	-	-	-	-	-
More active compartments in Berkshire	13	40820000	40840000	-1.60471	-2.22225	0.617538	0.991866	-	-	-	-	-
More active compartments in Berkshire	13	40840000	40860000	-1.76751	-2.46263	0.695118	0.991402	-	-	-	-	-
More active compartments in Berkshire	13	40860000	40880000	-1.84836	-2.57878	0.73043	0.994527	-	-	-	-	-
More active compartments in Berkshire	13	40880000	40900000	-2.03845	-2.72475	0.686293	0.98751	-	-	-	-	-
More active compartments in Berkshire	13	40900000	40920000	-2.09131	-2.86153	0.770225	0.992543	-	-	-	-	-
More active compartments in Berkshire	13	40920000	40940000	-2.01026	-2.62628	0.616023	0.991687	-	-	-	-	-
More active compartments in Berkshire	13	40980000	41000000	-1.60261	-2.48769	0.885077	0.993937	-	-	-	-	-
More active compartments in Berkshire	13	41000000	41020000	-1.4667	-2.20793	0.741236	0.993725	-	-	-	-	-
More active compartments in Berkshire	13	41020000	41040000	-1.628	-2.30297	0.674969	0.99521	-	-	-	-	-
More active compartments in Berkshire	13	41040000	41060000	-1.51609	-2.05204	0.53595	0.998594	-	-	-	-	-
More active compartments in Berkshire	13	41060000	41080000	-1.54018	-2.27222	0.732037	0.996956	-	-	-	-	-
More active compartments in Berkshire	13	41080000	41100000	-1.41916	-2.18248	0.763315	0.996101	-	-	-	-	-
More active compartments in Berkshire	13	41100000	41120000	-1.60372	-2.28796	0.684235	0.996309	-	-	-	-	-
More active compartments in Berkshire	13	41120000	41140000	-1.45393	-2.3886	0.934666	0.991746	-	-	-	-	-
More active compartments in Berkshire	13	41140000	41160000	-1.67417	-2.36769	0.693511	0.990702	-	-	-	-	-
More active compartments in Berkshire	13	41160000	41180000	-1.49457	-2.01101	0.516439	0.992555	-	-	-	-	-
More active compartments in Berkshire	13	41180000	41200000	-1.41381	-2.00197	0.588163	0.990047	-	-	-	-	-
More active compartments in Berkshire	13	41200000	41220000	-1.42719	-2.00997	0.582782	0.993386	ENSSSCG00000035734	Unknown	0.0865928	0.0865928	-
More active compartments in Berkshire	13	41220000	41240000	-1.25057	-1.78832	0.537756	0.995658	-	-	-	-	-
More active compartments in Berkshire	13	41240000	41260000	-0.950331	-1.64895	0.69862	0.996701	-	-	-	-	-
More active compartments in Berkshire	13	41300000	41320000	-0.609224	-1.13711	0.527887	0.993386	-	-	-	-	-
More active compartments in Berkshire	13	41380000	41400000	-0.466627	-1.01054	0.543917	0.994011	-	-	-	-	-
More active compartments in Berkshire	13	50760000	50780000	1.9524	1.44199	0.510409	0.992336	-	-	-	-	-
More active compartments in Berkshire	13	50800000	50820000	1.76661	1.19522	0.57139	0.992339	ENSSSCG00000011511	FRMD4B	29.6218	21.4885	0.579566
More active compartments in Berkshire	13	51200000	51220000	1.18996	0.632721	0.557244	0.993773	-	-	-	-	-
More active compartments in Berkshire	13	51720000	51740000	-2.0153	-2.59871	0.58341	0.995607	-	-	-	-	-
More active compartments in Berkshire	13	51920000	51940000	-0.514015	-1.0605	0.546486	0.997195	-	-	-	-	-
More active compartments in Berkshire	13	55040000	55060000	-1.63266	-2.13276	0.500106	0.993348	-	-	-	-	-
More active compartments in Berkshire	13	82660000	82680000	1.83066	1.32723	0.503431	0.996042	-	-	-	-	-
More active compartments in Berkshire	13	82680000	82700000	2.07008	1.46692	0.603156	0.994751	ENSSSCG00000011676	ATP1B3	50.3942	47.4712	0.514934
More active compartments in Berkshire	13	95860000	95880000	-1.51448	-2.01538	0.500892	0.99417	-	-	-	-	-
More active compartments in Berkshire	13	101840000	101860000	-3.9376	-4.45515	0.517542	0.99831	-	-	-	-	-
More active compartments in Berkshire	13	101880000	101900000	-3.76426	-4.33611	0.571848	0.998634	-	-	-	-	-
More active compartments in Berkshire	13	101900000	101920000	-3.61943	-4.14242	0.522988	0.998783	-	-	-	-	-
More active compartments in Berkshire	13	157980000	158000000	-1.44607	-1.95947	0.513398	0.993136	-	-	-	-	-
More active compartments in Berkshire	13	158160000	158180000	-0.868059	-1.39717	0.529113	0.994281	-	-	-	-	-
More active compartments in Berkshire	13	158180000	158200000	-0.785806	-1.30811	0.522306	0.994284	-	-	-	-	-
More active compartments in Berkshire	13	169900000	169920000	-2.38597	-2.91652	0.530547	0.997529	-	-	-	-	-
More active compartments in Berkshire	13	169980000	170000000	-2.50599	-3.01568	0.509695	0.993687	-	-	-	-	-
More active compartments in Berkshire	13	170140000	170160000	-2.6185	-3.13163	0.513132	0.998928	-	-	-	-	-
More active compartments in Berkshire	13	170500000	170520000	-3.15748	-3.73008	0.572603	0.996609	-	-	-	-	-
More active compartments in Berkshire	13	170540000	170560000	-3.1009	-3.60342	0.502519	0.997542	-	-	-	-	-
More active compartments in Berkshire	13	170580000	170600000	-3.02828	-3.54321	0.514932	0.996604	-	-	-	-	-
More active compartments in Berkshire	13	171420000	171440000	-2.54676	-3.07088	0.524119	0.995607	-	-	-	-	-
More active compartments in Berkshire	13	171440000	171460000	-2.5037	-3.00987	0.506174	0.995539	-	-	-	-	-
More active compartments in Berkshire	13	171460000	171480000	-2.35975	-2.9779	0.618149	0.996654	-	-	-	-	-
More active compartments in Berkshire	13	171480000	171500000	-2.21528	-2.96752	0.75224	0.99752	-	-	-	-	-
More active compartments in Berkshire	13	171520000	171540000	-2.29603	-2.83135	0.535317	0.996195	-	-	-	-	-
More active compartments in Berkshire	13	171540000	171560000	-2.07783	-2.72107	0.64324	0.995722	-	-	-	-	-
More active compartments in Berkshire	13	171580000	171600000	-2.106	-2.7862	0.680196	0.996432	-	-	-	-	-
More active compartments in Berkshire	13	171600000	171620000	-2.04279	-2.7387	0.69591	0.994096	-	-	-	-	-
More active compartments in Berkshire	13	171640000	171660000	-1.88455	-2.80028	0.915726	0.985937	-	-	-	-	-
More active compartments in Berkshire	13	171660000	171680000	-1.9934	-2.84188	0.848483	0.995632	-	-	-	-	-
More active compartments in Berkshire	13	171700000	171720000	-2.26747	-2.93794	0.670474	0.995863	-	-	-	-	-
More active compartments in Berkshire	13	171720000	171740000	-2.22754	-2.77341	0.545874	0.996877	-	-	-	-	-
More active compartments in Berkshire	13	171820000	171840000	-2.65161	-3.16231	0.510702	0.989064	-	-	-	-	-
More active compartments in Berkshire	13	171860000	171880000	-2.49294	-3.01241	0.519463	0.993335	-	-	-	-	-
More active compartments in Berkshire	13	172140000	172160000	-2.50808	-3.10024	0.59216	0.997268	-	-	-	-	-
More active compartments in Berkshire	13	188400000	188420000	-2.59622	-3.14596	0.549744	0.987042	-	-	-	-	-
More active compartments in Berkshire	13	188420000	188440000	-2.61033	-3.30443	0.694098	0.988591	-	-	-	-	-
More active compartments in Berkshire	13	188440000	188460000	-2.57233	-3.18951	0.61718	0.990512	-	-	-	-	-
More active compartments in Berkshire	13	188480000	188500000	-2.83343	-3.45499	0.621561	0.992036	-	-	-	-	-
More active compartments in Berkshire	13	188520000	188540000	-2.90703	-3.67216	0.765126	0.987642	-	-	-	-	-
More active compartments in Berkshire	13	188560000	188580000	-2.82394	-3.41702	0.59308	0.988413	-	-	-	-	-
More active compartments in Berkshire	13	188580000	188600000	-2.9702	-3.60161	0.63141	0.984915	-	-	-	-	-
More active compartments in Berkshire	13	188640000	188660000	-2.92277	-3.44311	0.520337	0.992058	-	-	-	-	-
More active compartments in Berkshire	13	192960000	192980000	-2.59624	-3.17356	0.577324	0.991474	-	-	-	-	-
More active compartments in Berkshire	13	193160000	193180000	-2.93644	-3.44086	0.50442	0.987582	-	-	-	-	-
More active compartments in Berkshire	13	204180000	204200000	1.52377	0.872818	0.650948	0.990976	-	-	-	-	-
More active compartments in Berkshire	13	205320000	205340000	7.51797	6.91236	0.605614	0.985638	-	-	-	-	-
More active compartments in Berkshire	13	206160000	206180000	7.2186	6.66659	0.552018	0.985254	-	-	-	-	-
More active compartments in Berkshire	13	207860000	207880000	6.76385	6.03696	0.726884	0.981714	-	-	-	-	-
More active compartments in Berkshire	13	208300000	208320000	8.75628	7.18023	1.57606	1	-	-	-	-	-
More active compartments in Berkshire	14	0	20000	-8.27156	-9.48366	1.21209	0.998997	ENSSSCG00000038672	CHCHD2	0.0293406	0.0293406	-
More active compartments in Berkshire	14	5960000	5980000	-3.98279	-4.51507	0.532282	0.997517	-	-	-	-	-
More active compartments in Berkshire	14	5980000	6000000	-1.12516	-2.44298	1.31783	0.999925	-	-	-	-	-
More active compartments in Berkshire	14	22200000	22220000	-4.25988	-4.87001	0.610128	0.98914	-	-	-	-	-
More active compartments in Berkshire	14	22260000	22280000	-3.8481	-4.36385	0.515756	0.98535	-	-	-	-	-
More active compartments in Berkshire	14	22280000	22300000	-3.84741	-4.39919	0.551783	0.98568	-	-	-	-	-
More active compartments in Berkshire	14	22400000	22420000	-1.76204	-2.32684	0.564801	0.989276	ENSSSCG00000035929	ANHX	1.48378	0	1
More active compartments in Berkshire	14	22460000	22480000	-1.0476	-1.57906	0.531459	0.992843	ENSSSCG00000050121;ENSSSCG00000050764	ANHX;Unknown	0.287636428759;0.0883061228431601	0.091685985208;0.0812677439075066	-;-
More active compartments in Berkshire	14	51580000	51600000	4.25737	3.65704	0.600328	0.997937	-	-	-	-	-
More active compartments in Berkshire	14	51640000	51660000	4.17592	3.63139	0.544531	0.998362	ENSSSCG00000032073	DGCR6L	17.5607	16.3743	0.517481
More active compartments in Berkshire	14	62540000	62560000	-2.26591	-2.92253	0.656619	0.993155	-	-	-	-	-
More active compartments in Berkshire	14	68440000	68460000	-5.55722	-6.22234	0.665116	0.993199	-	-	-	-	-
More active compartments in Berkshire	14	68500000	68520000	-5.59514	-6.20679	0.61165	0.991213	-	-	-	-	-
More active compartments in Berkshire	14	68520000	68540000	-5.74607	-6.33518	0.589107	0.995575	-	-	-	-	-
More active compartments in Berkshire	14	69100000	69120000	-5.87748	-6.42324	0.545764	0.994281	-	-	-	-	-
More active compartments in Berkshire	14	69140000	69160000	-5.82712	-6.40129	0.574168	0.994689	-	-	-	-	-
More active compartments in Berkshire	14	87200000	87220000	-3.95734	-4.46191	0.504569	0.993566	-	-	-	-	-
More active compartments in Berkshire	14	87340000	87360000	-2.57774	-4.54366	1.96591	0.997559	-	-	-	-	-
More active compartments in Berkshire	14	87360000	87380000	-2.84589	-5.02413	2.17825	0.998209	-	-	-	-	-
More active compartments in Berkshire	14	87380000	87400000	-2.72862	-4.85468	2.12606	0.997062	-	-	-	-	-
More active compartments in Berkshire	14	87400000	87420000	-2.79421	-4.95671	2.1625	0.998661	-	-	-	-	-
More active compartments in Berkshire	14	87420000	87440000	-2.50178	-4.36793	1.86615	0.997865	-	-	-	-	-
More active compartments in Berkshire	14	89420000	89440000	-1.85998	-2.41173	0.551752	0.994478	-	-	-	-	-
More active compartments in Berkshire	14	89440000	89460000	-1.85703	-2.52273	0.6657	0.990526	-	-	-	-	-
More active compartments in Berkshire	14	89460000	89480000	-1.859	-2.37985	0.520855	0.994003	-	-	-	-	-
More active compartments in Berkshire	14	89480000	89500000	-1.67578	-2.27594	0.600158	0.996238	-	-	-	-	-
More active compartments in Berkshire	14	89500000	89520000	-1.52226	-2.19346	0.671202	0.994494	-	-	-	-	-
More active compartments in Berkshire	14	89520000	89540000	-1.44041	-2.1012	0.660794	0.988319	-	-	-	-	-
More active compartments in Berkshire	14	89540000	89560000	-1.33859	-1.89513	0.556545	0.99226	-	-	-	-	-
More active compartments in Berkshire	14	89560000	89580000	-1.42626	-2.05672	0.630463	0.992054	ENSSSCG00000010384	LRRC18	0.448063	0.575547	0.437728
More active compartments in Berkshire	14	89580000	89600000	-1.26637	-1.76717	0.500801	0.994823	-	-	-	-	-
More active compartments in Berkshire	14	89600000	89620000	-1.21935	-1.75408	0.534724	0.992124	-	-	-	-	-
More active compartments in Berkshire	14	89660000	89680000	-1.19714	-1.71587	0.518725	0.988719	-	-	-	-	-
More active compartments in Berkshire	14	89680000	89700000	-1.08802	-1.59203	0.504002	0.990814	ENSSSCG00000010386	Unknown	0	0	-
More active compartments in Berkshire	14	90160000	90180000	-2.33057	-2.91771	0.587137	0.993558	ENSSSCG00000010393	C10orf53	0.0249422	0.0249422	-
More active compartments in Berkshire	14	92080000	92100000	-2.4394	-3.07141	0.632012	0.995383	-	-	-	-	-
More active compartments in Berkshire	14	106020000	106040000	-1.41804	-1.93808	0.520037	0.996715	-	-	-	-	-
More active compartments in Berkshire	14	106040000	106060000	-1.6377	-2.21505	0.577354	0.997539	-	-	-	-	-
More active compartments in Berkshire	14	106060000	106080000	-1.62601	-2.24011	0.614102	0.996109	ENSSSCG00000032095	Unknown	2.85025	21.8519	0.115385
More active compartments in Berkshire	14	106080000	106100000	-1.79925	-2.51805	0.718805	0.995978	-	-	-	-	-
More active compartments in Berkshire	14	106100000	106120000	-1.95416	-2.77215	0.817989	0.995853	-	-	-	-	-
More active compartments in Berkshire	14	106120000	106140000	-1.82097	-2.68755	0.866585	0.997434	-	-	-	-	-
More active compartments in Berkshire	14	106140000	106160000	-1.65182	-2.49769	0.845875	0.995332	ENSSSCG00000040085	Unknown	0	0	-
More active compartments in Berkshire	14	106160000	106180000	-1.86814	-2.67726	0.809122	0.987264	-	-	-	-	-
More active compartments in Berkshire	14	106180000	106200000	-1.69515	-2.79485	1.0997	0.989281	-	-	-	-	-
More active compartments in Berkshire	14	106200000	106220000	-1.70829	-2.61345	0.905155	0.993454	-	-	-	-	-
More active compartments in Berkshire	14	106600000	106620000	-1.5621	-2.17657	0.614469	0.99408	-	-	-	-	-
More active compartments in Berkshire	14	106620000	106640000	-1.33063	-1.87612	0.545491	0.995275	-	-	-	-	-
More active compartments in Berkshire	14	118640000	118660000	-5.98852	-6.50107	0.512546	0.993322	-	-	-	-	-
More active compartments in Berkshire	14	118980000	119000000	-5.93219	-6.4444	0.512217	0.991337	-	-	-	-	-
More active compartments in Berkshire	14	119020000	119040000	-5.8523	-6.37026	0.517957	0.991446	-	-	-	-	-
More active compartments in Berkshire	14	119180000	119200000	-5.78196	-6.32257	0.540616	0.987358	-	-	-	-	-
More active compartments in Berkshire	14	119280000	119300000	-5.6346	-6.2108	0.576203	0.98948	-	-	-	-	-
More active compartments in Berkshire	14	119320000	119340000	-5.70546	-6.21095	0.505493	0.987589	-	-	-	-	-
More active compartments in Berkshire	14	119360000	119380000	-5.60023	-6.27716	0.676937	0.993612	-	-	-	-	-
More active compartments in Berkshire	14	119380000	119400000	-5.61516	-6.18837	0.573205	0.99174	-	-	-	-	-
More active compartments in Berkshire	14	119460000	119480000	-5.57916	-6.17278	0.593617	0.992092	-	-	-	-	-
More active compartments in Berkshire	14	125440000	125460000	-2.26912	-2.86148	0.592359	0.988829	-	-	-	-	-
More active compartments in Berkshire	14	125460000	125480000	-2.69946	-3.30025	0.600797	0.991615	-	-	-	-	-
More active compartments in Berkshire	14	125480000	125500000	-3.07125	-3.74596	0.674713	0.992567	-	-	-	-	-
More active compartments in Berkshire	14	125500000	125520000	-3.48729	-4.15205	0.664764	0.990801	-	-	-	-	-
More active compartments in Berkshire	14	125540000	125560000	-3.70083	-4.39319	0.692361	0.995461	-	-	-	-	-
More active compartments in Berkshire	14	125560000	125580000	-3.94891	-4.53856	0.589645	0.991065	-	-	-	-	-
More active compartments in Berkshire	14	125580000	125600000	-3.94923	-4.7076	0.758364	0.987474	-	-	-	-	-
More active compartments in Berkshire	14	125600000	125620000	-3.9459	-4.60222	0.656328	0.99085	-	-	-	-	-
More active compartments in Berkshire	14	125620000	125640000	-3.82868	-4.68242	0.853742	0.987798	-	-	-	-	-
More active compartments in Berkshire	14	125640000	125660000	-4.12473	-4.80247	0.67774	0.988463	-	-	-	-	-
More active compartments in Berkshire	14	125660000	125680000	-4.10504	-4.88515	0.780114	0.985583	-	-	-	-	-
More active compartments in Berkshire	14	125680000	125700000	-4.10703	-4.75191	0.644881	0.981848	-	-	-	-	-
More active compartments in Berkshire	14	125700000	125720000	-4.40378	-4.99995	0.596175	0.994056	-	-	-	-	-
More active compartments in Berkshire	14	125720000	125740000	-4.46489	-4.97329	0.508399	0.994885	-	-	-	-	-
More active compartments in Berkshire	14	125740000	125760000	-4.55947	-5.31268	0.753214	0.988688	-	-	-	-	-
More active compartments in Berkshire	14	125780000	125800000	-4.62521	-5.16552	0.540302	0.984907	-	-	-	-	-
More active compartments in Berkshire	14	125800000	125820000	-4.69699	-5.22593	0.528944	0.991885	-	-	-	-	-
More active compartments in Berkshire	14	125840000	125860000	-4.58965	-5.29507	0.705425	0.989563	-	-	-	-	-
More active compartments in Berkshire	14	125880000	125900000	-4.62559	-5.3661	0.740507	0.987484	-	-	-	-	-
More active compartments in Berkshire	14	125900000	125920000	-4.65272	-5.25686	0.604139	0.988722	-	-	-	-	-
More active compartments in Berkshire	14	126000000	126020000	-4.46824	-5.00243	0.534194	0.991428	-	-	-	-	-
More active compartments in Berkshire	14	126520000	126540000	-4.35893	-4.91203	0.553097	0.991309	-	-	-	-	-
More active compartments in Berkshire	14	126620000	126640000	-5.0318	-5.71097	0.679166	0.99438	-	-	-	-	-
More active compartments in Berkshire	14	126900000	126920000	-1.87693	-2.48463	0.607703	0.983734	-	-	-	-	-
More active compartments in Berkshire	14	126960000	126980000	-1.48312	-2.24268	0.759563	0.983205	-	-	-	-	-
More active compartments in Berkshire	14	127420000	127440000	-0.628563	-1.14899	0.520425	0.987747	-	-	-	-	-
More active compartments in Berkshire	14	129960000	129980000	-0.454181	-0.999647	0.545466	0.987883	-	-	-	-	-
More active compartments in Berkshire	14	129980000	130000000	-0.714922	-1.2817	0.566779	0.987473	-	-	-	-	-
More active compartments in Berkshire	14	130040000	130060000	-0.633045	-1.15635	0.523307	0.990867	-	-	-	-	-
More active compartments in Berkshire	14	130100000	130120000	-0.845842	-1.53823	0.692384	0.981745	-	-	-	-	-
More active compartments in Berkshire	14	130120000	130140000	-0.736249	-1.43558	0.69933	0.98565	-	-	-	-	-
More active compartments in Berkshire	14	130140000	130160000	-0.787347	-1.63795	0.850602	0.978304	-	-	-	-	-
More active compartments in Berkshire	14	130180000	130200000	-1.00092	-1.52959	0.528671	0.989359	-	-	-	-	-
More active compartments in Berkshire	14	130200000	130220000	-0.84684	-1.36946	0.522624	0.978063	-	-	-	-	-
More active compartments in Berkshire	14	130220000	130240000	-0.763254	-1.38384	0.620585	0.983182	-	-	-	-	-
More active compartments in Berkshire	14	130240000	130260000	-0.750182	-1.4376	0.687416	0.979501	-	-	-	-	-
More active compartments in Berkshire	14	130260000	130280000	-0.815294	-1.55298	0.737686	0.981944	ENSSSCG00000010691	PLPP4	0.963209	0.666735	0.590946
More active compartments in Berkshire	14	130280000	130300000	-0.918338	-1.5102	0.591865	0.982623	-	-	-	-	-
More active compartments in Berkshire	14	130320000	130340000	-0.839413	-1.78988	0.950469	0.985568	-	-	-	-	-
More active compartments in Berkshire	14	130340000	130360000	-1.01311	-1.76686	0.753751	0.9882	-	-	-	-	-
More active compartments in Berkshire	14	130360000	130380000	-1.07826	-1.82807	0.749815	0.990025	-	-	-	-	-
More active compartments in Berkshire	14	130380000	130400000	-0.813775	-1.78806	0.974282	0.988476	-	-	-	-	-
More active compartments in Berkshire	14	130400000	130420000	-0.42974	-1.63525	1.20551	0.979445	-	-	-	-	-
More active compartments in Berkshire	14	130420000	130440000	-0.539387	-1.60299	1.0636	0.980894	-	-	-	-	-
More active compartments in Berkshire	14	130440000	130460000	-0.430198	-1.47697	1.04677	0.979986	-	-	-	-	-
More active compartments in Berkshire	14	130460000	130480000	-0.560705	-1.4184	0.85769	0.976855	-	-	-	-	-
More active compartments in Berkshire	14	130480000	130500000	-0.682377	-1.2838	0.601418	0.981629	-	-	-	-	-
More active compartments in Berkshire	14	130500000	130520000	-0.544158	-1.24942	0.705258	0.986075	ENSSSCG00000010692	WDR11	13.2342	13.1779	0.501066
More active compartments in Berkshire	14	130520000	130540000	-0.483578	-1.14533	0.661754	0.987216	-	-	-	-	-
More active compartments in Berkshire	14	130640000	130660000	1.41745	0.736926	0.68052	0.976939	-	-	-	-	-
More active compartments in Berkshire	14	130760000	130780000	-0.571003	-1.08876	0.517758	0.987703	-	-	-	-	-
More active compartments in Berkshire	14	130780000	130800000	-0.602633	-1.14466	0.542027	0.987233	-	-	-	-	-
More active compartments in Berkshire	14	130800000	130820000	-0.886671	-1.39948	0.512804	0.983929	-	-	-	-	-
More active compartments in Berkshire	14	130840000	130860000	-1.02077	-1.63702	0.616251	0.98679	-	-	-	-	-
More active compartments in Berkshire	14	130860000	130880000	-1.06323	-1.64153	0.578303	0.993309	-	-	-	-	-
More active compartments in Berkshire	14	130880000	130900000	-1.22437	-1.85436	0.629985	0.992025	-	-	-	-	-
More active compartments in Berkshire	14	130900000	130920000	-1.22045	-1.89145	0.671	0.987962	-	-	-	-	-
More active compartments in Berkshire	14	130920000	130940000	-1.11889	-1.96086	0.841967	0.985764	-	-	-	-	-
More active compartments in Berkshire	14	130940000	130960000	-1.24063	-1.93497	0.694338	0.99029	-	-	-	-	-
More active compartments in Berkshire	14	130960000	130980000	-1.2515	-1.82341	0.571916	0.989723	-	-	-	-	-
More active compartments in Berkshire	14	130980000	131000000	-1.2623	-1.85221	0.589914	0.989008	-	-	-	-	-
More active compartments in Berkshire	14	131000000	131020000	-1.04614	-1.54684	0.500699	0.988207	-	-	-	-	-
More active compartments in Berkshire	14	131020000	131040000	-1.09387	-1.71767	0.62381	0.993245	-	-	-	-	-
More active compartments in Berkshire	14	131060000	131080000	-0.903252	-1.45766	0.554411	0.990397	ENSSSCG00000041462;ENSSSCG00000043365	Unknown;Unknown	2.54842394596364;-	0.254842394596364;-	0.909090909090909;-
More active compartments in Berkshire	14	131080000	131100000	-0.540109	-1.13081	0.590697	0.982666	-	-	-	-	-
More active compartments in Berkshire	14	131100000	131120000	-0.629353	-1.18343	0.554078	0.982503	-	-	-	-	-
More active compartments in Berkshire	14	131440000	131460000	2.06382	1.36051	0.703309	0.993707	-	-	-	-	-
More active compartments in Berkshire	14	131500000	131520000	2.37875	1.77168	0.607066	0.982651	-	-	-	-	-
More active compartments in Berkshire	14	131540000	131560000	2.69094	2.16145	0.529495	0.983924	-	-	-	-	-
More active compartments in Berkshire	14	131620000	131640000	3.07588	2.49981	0.576064	0.982379	ENSSSCG00000037530	TACC2	1.48715	0.234998	0.863544
More active compartments in Berkshire	14	131640000	131660000	2.85709	2.28675	0.570344	0.978165	-	-	-	-	-
More active compartments in Berkshire	14	131680000	131700000	2.58345	1.97997	0.603472	0.987714	-	-	-	-	-
More active compartments in Berkshire	14	131700000	131720000	2.82266	2.08237	0.74029	0.98916	-	-	-	-	-
More active compartments in Berkshire	14	131720000	131740000	2.56825	1.99572	0.572533	0.977713	-	-	-	-	-
More active compartments in Berkshire	14	131740000	131760000	2.4618	1.95239	0.509415	0.983763	-	-	-	-	-
More active compartments in Berkshire	14	131760000	131780000	2.51751	1.87022	0.647293	0.988636	-	-	-	-	-
More active compartments in Berkshire	14	131780000	131800000	2.50799	1.81108	0.696902	0.993362	-	-	-	-	-
More active compartments in Berkshire	14	131800000	131820000	2.44899	1.78957	0.659422	0.984136	-	-	-	-	-
More active compartments in Berkshire	14	131820000	131840000	2.59917	2.02187	0.577298	0.985321	-	-	-	-	-
More active compartments in Berkshire	14	132200000	132220000	2.33962	1.7408	0.598816	0.993745	-	-	-	-	-
More active compartments in Berkshire	14	141520000	141540000	-0.591788	-1.53348	0.941695	0.999172	ENSSSCG00000049624	Unknown	0.0263507	0.0263507	-
More active compartments in Berkshire	14	141540000	141560000	-0.366579	-1.40938	1.0428	0.999461	ENSSSCG00000040664	Unknown	0.0218642	0.0218642	-
More active compartments in Berkshire	14	141740000	141760000	2.03053	0.401739	1.62879	1	-	-	-	-	-
More active compartments in Berkshire	15	0	20000	-6.5968	-7.83783	1.24103	1	-	-	-	-	-
More active compartments in Berkshire	15	20000	40000	-5.89745	-7.51088	1.61343	0.999861	-	-	-	-	-
More active compartments in Berkshire	15	9260000	9280000	-1.1483	-1.66705	0.518753	0.996684	-	-	-	-	-
More active compartments in Berkshire	15	20860000	20880000	-3.49385	-4.0405	0.546658	0.995149	-	-	-	-	-
More active compartments in Berkshire	15	20900000	20920000	-3.2932	-3.93847	0.645269	0.994579	-	-	-	-	-
More active compartments in Berkshire	15	20920000	20940000	-3.19036	-3.83206	0.641705	0.992504	-	-	-	-	-
More active compartments in Berkshire	15	20940000	20960000	-2.97789	-3.70382	0.725936	0.991699	-	-	-	-	-
More active compartments in Berkshire	15	20960000	20980000	-2.68319	-3.46203	0.77885	0.9921	-	-	-	-	-
More active compartments in Berkshire	15	20980000	21000000	-2.69727	-3.32179	0.624517	0.994151	-	-	-	-	-
More active compartments in Berkshire	15	21000000	21020000	-2.68249	-3.71869	1.0362	0.989984	-	-	-	-	-
More active compartments in Berkshire	15	21020000	21040000	-2.77375	-3.68995	0.916206	0.989575	-	-	-	-	-
More active compartments in Berkshire	15	21060000	21080000	-2.70615	-3.72103	1.01488	0.99471	-	-	-	-	-
More active compartments in Berkshire	15	21080000	21100000	-2.59131	-3.80637	1.21507	0.994868	-	-	-	-	-
More active compartments in Berkshire	15	21100000	21120000	-2.50549	-3.92516	1.41967	0.994316	-	-	-	-	-
More active compartments in Berkshire	15	21120000	21140000	-2.60714	-3.70758	1.10044	0.990051	-	-	-	-	-
More active compartments in Berkshire	15	21140000	21160000	-2.46483	-3.73961	1.27478	0.990408	-	-	-	-	-
More active compartments in Berkshire	15	21160000	21180000	-2.45863	-3.7151	1.25646	0.992452	-	-	-	-	-
More active compartments in Berkshire	15	21180000	21200000	-2.63611	-3.85083	1.21472	0.994947	-	-	-	-	-
More active compartments in Berkshire	15	21200000	21220000	-2.82427	-3.9221	1.09783	0.993486	-	-	-	-	-
More active compartments in Berkshire	15	21220000	21240000	-3.00037	-3.98573	0.985368	0.992205	-	-	-	-	-
More active compartments in Berkshire	15	21240000	21260000	-2.90104	-3.94654	1.0455	0.986714	-	-	-	-	-
More active compartments in Berkshire	15	21260000	21280000	-2.98591	-3.78184	0.795928	0.990705	-	-	-	-	-
More active compartments in Berkshire	15	21280000	21300000	-2.96426	-3.62352	0.659257	0.99198	-	-	-	-	-
More active compartments in Berkshire	15	21300000	21320000	-2.58247	-3.65742	1.07495	0.989358	-	-	-	-	-
More active compartments in Berkshire	15	21340000	21360000	-2.62332	-3.51721	0.89389	0.995313	-	-	-	-	-
More active compartments in Berkshire	15	21360000	21380000	-2.53194	-3.45633	0.924391	0.993366	-	-	-	-	-
More active compartments in Berkshire	15	21380000	21400000	-2.78597	-3.64764	0.861665	0.994149	-	-	-	-	-
More active compartments in Berkshire	15	21400000	21420000	-2.82313	-3.77645	0.953314	0.993152	-	-	-	-	-
More active compartments in Berkshire	15	21420000	21440000	-3.0223	-3.83925	0.816953	0.991404	-	-	-	-	-
More active compartments in Berkshire	15	21500000	21520000	-2.92778	-3.75356	0.825776	0.991698	-	-	-	-	-
More active compartments in Berkshire	15	21520000	21540000	-2.88061	-3.95049	1.06988	0.990661	-	-	-	-	-
More active compartments in Berkshire	15	21540000	21560000	-3.18014	-4.06329	0.883153	0.991174	-	-	-	-	-
More active compartments in Berkshire	15	21560000	21580000	-3.12916	-4.02775	0.898589	0.992268	-	-	-	-	-
More active compartments in Berkshire	15	21600000	21620000	-3.14833	-4.06732	0.918991	0.988962	-	-	-	-	-
More active compartments in Berkshire	15	21660000	21680000	-3.33548	-4.31719	0.981708	0.987963	-	-	-	-	-
More active compartments in Berkshire	15	21680000	21700000	-3.47334	-4.40687	0.93353	0.993435	-	-	-	-	-
More active compartments in Berkshire	15	21700000	21720000	-3.74007	-4.61217	0.872094	0.989177	-	-	-	-	-
More active compartments in Berkshire	15	21720000	21740000	-3.60048	-4.55002	0.949538	0.989001	-	-	-	-	-
More active compartments in Berkshire	15	21740000	21760000	-3.45023	-4.59209	1.14186	0.990737	-	-	-	-	-
More active compartments in Berkshire	15	21760000	21780000	-3.55241	-4.49923	0.946818	0.993266	ENSSSCG00000051241	Unknown	-	-	-
More active compartments in Berkshire	15	21780000	21800000	-3.71545	-4.53146	0.816015	0.992062	-	-	-	-	-
More active compartments in Berkshire	15	21800000	21820000	-3.54903	-4.5481	0.999071	0.992144	-	-	-	-	-
More active compartments in Berkshire	15	21820000	21840000	-3.43973	-4.50833	1.0686	0.989952	-	-	-	-	-
More active compartments in Berkshire	15	21840000	21860000	-3.45971	-4.52581	1.0661	0.995928	-	-	-	-	-
More active compartments in Berkshire	15	21860000	21880000	-3.45335	-4.37685	0.923501	0.986173	-	-	-	-	-
More active compartments in Berkshire	15	21880000	21900000	-3.18959	-4.56364	1.37405	0.988547	-	-	-	-	-
More active compartments in Berkshire	15	21900000	21920000	-3.23827	-4.57366	1.33539	0.991161	-	-	-	-	-
More active compartments in Berkshire	15	21920000	21940000	-3.44892	-4.46798	1.01906	0.9947	-	-	-	-	-
More active compartments in Berkshire	15	21940000	21960000	-3.43397	-4.52233	1.08836	0.997174	-	-	-	-	-
More active compartments in Berkshire	15	21960000	21980000	-3.25266	-4.37842	1.12576	0.995934	-	-	-	-	-
More active compartments in Berkshire	15	21980000	22000000	-3.24219	-4.38212	1.13993	0.990268	-	-	-	-	-
More active compartments in Berkshire	15	22000000	22020000	-3.25769	-4.27666	1.01896	0.989358	-	-	-	-	-
More active compartments in Berkshire	15	22020000	22040000	-3.30999	-4.19402	0.884033	0.992603	-	-	-	-	-
More active compartments in Berkshire	15	22040000	22060000	-3.3195	-4.27289	0.953392	0.988705	-	-	-	-	-
More active compartments in Berkshire	15	22060000	22080000	-3.41855	-4.16147	0.742926	0.990374	-	-	-	-	-
More active compartments in Berkshire	15	22080000	22100000	-3.35831	-4.40507	1.04676	0.987095	-	-	-	-	-
More active compartments in Berkshire	15	22100000	22120000	-3.38704	-4.28377	0.896728	0.991859	-	-	-	-	-
More active compartments in Berkshire	15	22140000	22160000	-3.53025	-4.24246	0.712212	0.990992	-	-	-	-	-
More active compartments in Berkshire	15	22160000	22180000	-3.60442	-4.26607	0.661649	0.996078	-	-	-	-	-
More active compartments in Berkshire	15	22180000	22200000	-3.70737	-4.25672	0.549345	0.994376	-	-	-	-	-
More active compartments in Berkshire	15	23680000	23700000	2.59786	2.07741	0.52045	0.992948	-	-	-	-	-
More active compartments in Berkshire	15	23840000	23860000	-0.480906	-0.991988	0.511082	0.992782	-	-	-	-	-
More active compartments in Berkshire	15	23860000	23880000	-0.512685	-1.13417	0.621488	0.994132	-	-	-	-	-
More active compartments in Berkshire	15	23960000	23980000	-0.698749	-1.20673	0.507985	0.991127	-	-	-	-	-
More active compartments in Berkshire	15	24040000	24060000	-0.782142	-1.50514	0.722995	0.99142	-	-	-	-	-
More active compartments in Berkshire	15	24080000	24100000	-0.953914	-1.65515	0.701235	0.992643	-	-	-	-	-
More active compartments in Berkshire	15	24160000	24180000	-0.852053	-1.44089	0.588842	0.99746	-	-	-	-	-
More active compartments in Berkshire	15	24180000	24200000	-0.780873	-1.56654	0.785669	0.993973	-	-	-	-	-
More active compartments in Berkshire	15	24240000	24260000	-0.723211	-1.22463	0.501424	0.996107	-	-	-	-	-
More active compartments in Berkshire	15	24520000	24540000	1.04017	0.506513	0.533657	0.991061	-	-	-	-	-
More active compartments in Berkshire	15	24700000	24720000	1.84264	1.30425	0.538394	0.991669	ENSSSCG00000031239	Unknown	0.0938244	0.0938244	-
More active compartments in Berkshire	15	32060000	32080000	5.74708	5.23836	0.508729	0.987868	-	-	-	-	-
More active compartments in Berkshire	15	32400000	32420000	3.90294	3.34108	0.561865	0.991823	-	-	-	-	-
More active compartments in Berkshire	15	32680000	32700000	2.76399	2.16447	0.599517	0.982919	-	-	-	-	-
More active compartments in Berkshire	15	32740000	32760000	2.54611	2.03764	0.508472	0.995416	-	-	-	-	-
More active compartments in Berkshire	15	32880000	32900000	2.61097	2.05625	0.554725	0.992905	-	-	-	-	-
More active compartments in Berkshire	15	116280000	116300000	-1.76043	-2.3209	0.560462	0.992986	-	-	-	-	-
More active compartments in Berkshire	15	116380000	116400000	-2.22479	-2.89594	0.67115	0.993427	-	-	-	-	-
More active compartments in Berkshire	15	116500000	116520000	-2.42906	-3.02542	0.596361	0.991493	-	-	-	-	-
More active compartments in Berkshire	15	116520000	116540000	-2.23453	-2.8894	0.654861	0.993082	-	-	-	-	-
More active compartments in Berkshire	15	116560000	116580000	-2.74877	-3.29027	0.541497	0.99033	-	-	-	-	-
More active compartments in Berkshire	15	116680000	116700000	-2.97831	-3.51511	0.536796	0.991318	-	-	-	-	-
More active compartments in Berkshire	15	122000000	122020000	-1.53831	-2.10557	0.567264	0.986407	-	-	-	-	-
More active compartments in Berkshire	15	123080000	123100000	-1.40839	-1.9251	0.516716	0.988832	-	-	-	-	-
More active compartments in Berkshire	15	123480000	123500000	-1.00964	-1.51597	0.506322	0.989624	-	-	-	-	-
More active compartments in Berkshire	15	126820000	126840000	-2.67559	-3.24901	0.573421	0.987085	-	-	-	-	-
More active compartments in Berkshire	15	133940000	133960000	3.90826	3.40152	0.506735	0.98653	ENSSSCG00000016306	USP40	9.33191	10.4467	0.471819
More active compartments in Berkshire	15	137560000	137580000	4.29136	3.67101	0.620343	0.986353	ENSSSCG00000027723	UBE2F-SCLY	37.2206	34.8477	0.516463
More active compartments in Berkshire	16	1540000	1560000	-3.67942	-4.29076	0.611339	0.987573	-	-	-	-	-
More active compartments in Berkshire	16	23660000	23680000	-1.68243	-2.26074	0.578315	0.999833	-	-	-	-	-
More active compartments in Berkshire	16	56520000	56540000	-3.04353	-3.65173	0.608201	0.996836	-	-	-	-	-
More active compartments in Berkshire	16	58460000	58480000	-2.62367	-3.19222	0.568552	0.991562	-	-	-	-	-
More active compartments in Berkshire	16	60180000	60200000	-0.779466	-1.36907	0.589605	0.987218	-	-	-	-	-
More active compartments in Berkshire	16	60520000	60540000	-2.50481	-3.19167	0.686859	0.991611	-	-	-	-	-
More active compartments in Berkshire	16	60540000	60560000	-2.66788	-3.35019	0.68231	0.995844	-	-	-	-	-
More active compartments in Berkshire	16	60560000	60580000	-2.64044	-3.5755	0.935063	0.996468	-	-	-	-	-
More active compartments in Berkshire	16	60580000	60600000	-2.55784	-3.3855	0.827663	0.991385	-	-	-	-	-
More active compartments in Berkshire	16	60600000	60620000	-2.51352	-3.57635	1.06283	0.995682	-	-	-	-	-
More active compartments in Berkshire	16	60640000	60660000	-2.95345	-3.8644	0.910956	0.991266	-	-	-	-	-
More active compartments in Berkshire	16	60660000	60680000	-3.10176	-3.91924	0.817485	0.990688	-	-	-	-	-
More active compartments in Berkshire	16	60680000	60700000	-3.2201	-4.05033	0.830226	0.994924	-	-	-	-	-
More active compartments in Berkshire	16	60700000	60720000	-3.38204	-4.02234	0.640305	0.988671	-	-	-	-	-
More active compartments in Berkshire	16	60720000	60740000	-3.19422	-4.21825	1.02403	0.990598	-	-	-	-	-
More active compartments in Berkshire	16	60740000	60760000	-3.34689	-4.08218	0.735289	0.99037	-	-	-	-	-
More active compartments in Berkshire	16	60760000	60780000	-3.37188	-4.25757	0.885689	0.985827	-	-	-	-	-
More active compartments in Berkshire	16	60780000	60800000	-3.26444	-4.34839	1.08395	0.991063	-	-	-	-	-
More active compartments in Berkshire	16	60800000	60820000	-3.27574	-4.23237	0.956622	0.993131	-	-	-	-	-
More active compartments in Berkshire	16	60820000	60840000	-3.15161	-4.0993	0.947694	0.988715	-	-	-	-	-
More active compartments in Berkshire	16	60840000	60860000	-3.29182	-4.27196	0.98014	0.99108	-	-	-	-	-
More active compartments in Berkshire	16	60860000	60880000	-3.32644	-4.26906	0.94262	0.995134	-	-	-	-	-
More active compartments in Berkshire	16	60880000	60900000	-3.47623	-4.35513	0.878905	0.993493	-	-	-	-	-
More active compartments in Berkshire	16	60900000	60920000	-3.49113	-4.34421	0.853081	0.991926	-	-	-	-	-
More active compartments in Berkshire	16	60920000	60940000	-3.52291	-4.19106	0.668149	0.992341	-	-	-	-	-
More active compartments in Berkshire	16	60940000	60960000	-3.52328	-4.24856	0.725282	0.990863	-	-	-	-	-
More active compartments in Berkshire	16	60960000	60980000	-3.54998	-4.2676	0.717627	0.990482	-	-	-	-	-
More active compartments in Berkshire	16	60980000	61000000	-3.48647	-4.22669	0.740223	0.992487	-	-	-	-	-
More active compartments in Berkshire	16	61000000	61020000	-3.4867	-4.0668	0.5801	0.992536	-	-	-	-	-
More active compartments in Berkshire	16	61040000	61060000	-3.43357	-4.12044	0.686862	0.994296	-	-	-	-	-
More active compartments in Berkshire	16	61080000	61100000	-3.57711	-4.12618	0.549069	0.995747	-	-	-	-	-
More active compartments in Berkshire	16	61100000	61120000	-3.5096	-4.02702	0.517424	0.993085	-	-	-	-	-
More active compartments in Berkshire	16	61120000	61140000	-3.38234	-3.91949	0.53715	0.994758	-	-	-	-	-
More active compartments in Berkshire	16	61140000	61160000	-3.2041	-3.85389	0.649792	0.992433	-	-	-	-	-
More active compartments in Berkshire	16	61160000	61180000	-3.25891	-3.99252	0.733615	0.992549	-	-	-	-	-
More active compartments in Berkshire	16	61180000	61200000	-3.29723	-3.8925	0.595269	0.989955	-	-	-	-	-
More active compartments in Berkshire	16	61200000	61220000	-3.16619	-3.93505	0.768861	0.991296	-	-	-	-	-
More active compartments in Berkshire	16	61220000	61240000	-3.31048	-3.81266	0.502178	0.990376	-	-	-	-	-
More active compartments in Berkshire	16	61240000	61260000	-3.3372	-3.9195	0.582295	0.992483	-	-	-	-	-
More active compartments in Berkshire	16	61520000	61540000	-3.80905	-4.3494	0.540356	0.988585	-	-	-	-	-
More active compartments in Berkshire	16	63740000	63760000	-0.65466	-1.29053	0.635873	0.991805	-	-	-	-	-
More active compartments in Berkshire	16	64500000	64520000	-0.406835	-0.99788	0.591045	0.995949	-	-	-	-	-
More active compartments in Berkshire	16	65360000	65380000	1.45379	0.947068	0.506718	0.991394	-	-	-	-	-
More active compartments in Berkshire	16	66500000	66520000	-1.40416	-2.00726	0.603095	0.989115	-	-	-	-	-
More active compartments in Berkshire	16	66520000	66540000	-0.98856	-1.86089	0.872331	0.987153	-	-	-	-	-
More active compartments in Berkshire	16	66540000	66560000	-1.26259	-2.1051	0.842508	0.990361	-	-	-	-	-
More active compartments in Berkshire	16	66560000	66580000	-1.55092	-2.42792	0.876995	0.986739	-	-	-	-	-
More active compartments in Berkshire	16	66580000	66600000	-1.78946	-2.774	0.984535	0.986333	-	-	-	-	-
More active compartments in Berkshire	16	66620000	66640000	-2.28233	-2.96102	0.678687	0.979575	-	-	-	-	-
More active compartments in Berkshire	16	66640000	66660000	-2.11429	-3.01922	0.904933	0.983262	-	-	-	-	-
More active compartments in Berkshire	16	66680000	66700000	-2.55539	-3.3133	0.757917	0.983739	-	-	-	-	-
More active compartments in Berkshire	16	66700000	66720000	-2.61442	-3.34424	0.729818	0.987938	-	-	-	-	-
More active compartments in Berkshire	16	66720000	66740000	-2.67941	-3.32155	0.642144	0.990859	-	-	-	-	-
More active compartments in Berkshire	16	66780000	66800000	-2.85334	-3.44376	0.590413	0.989965	-	-	-	-	-
More active compartments in Berkshire	16	66820000	66840000	-2.95728	-3.62847	0.671187	0.987594	-	-	-	-	-
More active compartments in Berkshire	16	66860000	66880000	-2.86243	-3.78327	0.920836	0.983373	-	-	-	-	-
More active compartments in Berkshire	16	66880000	66900000	-2.91872	-3.7689	0.850173	0.984306	ENSSSCG00000017063	SGCD	2.2181	1.16012	0.656588
More active compartments in Berkshire	16	66900000	66920000	-3.4352	-4.17598	0.740784	0.988621	-	-	-	-	-
More active compartments in Berkshire	16	66920000	66940000	-3.72056	-4.49322	0.772656	0.985006	-	-	-	-	-
More active compartments in Berkshire	16	66940000	66960000	-3.73678	-4.44996	0.713178	0.987812	-	-	-	-	-
More active compartments in Berkshire	16	66960000	66980000	-3.91894	-4.73975	0.820808	0.983479	-	-	-	-	-
More active compartments in Berkshire	16	66980000	67000000	-4.02494	-4.69581	0.67087	0.987059	-	-	-	-	-
More active compartments in Berkshire	16	67000000	67020000	-4.11665	-4.73026	0.613617	0.985799	-	-	-	-	-
More active compartments in Berkshire	16	67020000	67040000	-3.90301	-4.81102	0.908009	0.988323	-	-	-	-	-
More active compartments in Berkshire	16	67040000	67060000	-3.88051	-4.6913	0.810799	0.990991	-	-	-	-	-
More active compartments in Berkshire	16	67060000	67080000	-4.01039	-4.69061	0.680224	0.988527	-	-	-	-	-
More active compartments in Berkshire	16	67080000	67100000	-4.06119	-4.59354	0.532357	0.987763	-	-	-	-	-
More active compartments in Berkshire	16	67100000	67120000	-4.01605	-4.5606	0.544553	0.976968	-	-	-	-	-
More active compartments in Berkshire	16	67120000	67140000	-3.90528	-4.44873	0.543459	0.985278	-	-	-	-	-
More active compartments in Berkshire	16	67160000	67180000	-3.51903	-4.2525	0.73347	0.985488	-	-	-	-	-
More active compartments in Berkshire	16	67180000	67200000	-3.51411	-4.06462	0.550505	0.989162	-	-	-	-	-
More active compartments in Berkshire	16	67200000	67220000	-3.52796	-4.07136	0.543397	0.989355	-	-	-	-	-
More active compartments in Berkshire	16	67220000	67240000	-3.50793	-4.11369	0.605763	0.990554	-	-	-	-	-
More active compartments in Berkshire	16	67240000	67260000	-3.61024	-4.16978	0.559534	0.988594	-	-	-	-	-
More active compartments in Berkshire	16	67360000	67380000	-3.97623	-4.50539	0.529157	0.989816	-	-	-	-	-
More active compartments in Berkshire	16	67400000	67420000	-3.72672	-4.30321	0.576489	0.988816	ENSSSCG00000043071	Unknown	0.162245	0.162245	-
More active compartments in Berkshire	16	67420000	67440000	-3.29467	-3.99302	0.69834	0.996006	-	-	-	-	-
More active compartments in Berkshire	16	67440000	67460000	-3.19893	-3.87144	0.672508	0.988452	-	-	-	-	-
More active compartments in Berkshire	16	67460000	67480000	-2.92674	-3.54339	0.616645	0.990187	-	-	-	-	-
More active compartments in Berkshire	16	67560000	67580000	-3.10676	-3.76039	0.653624	0.99113	-	-	-	-	-
More active compartments in Berkshire	16	67600000	67620000	-2.58981	-3.22457	0.634753	0.989327	-	-	-	-	-
More active compartments in Berkshire	16	67620000	67640000	-2.52527	-3.03457	0.509298	0.99305	-	-	-	-	-
More active compartments in Berkshire	16	67820000	67840000	-3.24123	-3.84877	0.607537	0.989347	-	-	-	-	-
More active compartments in Berkshire	16	72560000	72580000	-1.99136	-2.55731	0.565949	0.990558	-	-	-	-	-
More active compartments in Berkshire	16	72580000	72600000	-1.80261	-2.61953	0.816921	0.99298	-	-	-	-	-
More active compartments in Berkshire	16	72600000	72620000	-1.64477	-2.63978	0.995009	0.985396	-	-	-	-	-
More active compartments in Berkshire	16	72620000	72640000	-1.33781	-2.44324	1.10543	0.990838	-	-	-	-	-
More active compartments in Berkshire	16	72640000	72660000	-1.16506	-2.40496	1.23991	0.989114	-	-	-	-	-
More active compartments in Berkshire	16	72660000	72680000	-1.38269	-2.32106	0.938367	0.989378	-	-	-	-	-
More active compartments in Berkshire	16	72680000	72700000	-1.14405	-2.05096	0.906915	0.99051	-	-	-	-	-
More active compartments in Berkshire	16	72700000	72720000	-1.38637	-2.10773	0.721362	0.985906	-	-	-	-	-
More active compartments in Berkshire	16	72760000	72780000	-0.924578	-1.4246	0.500027	0.989067	-	-	-	-	-
More active compartments in Berkshire	16	72820000	72840000	-1.80614	-2.33381	0.527669	0.985055	-	-	-	-	-
More active compartments in Berkshire	16	72940000	72960000	-2.79055	-3.33356	0.543006	0.985031	-	-	-	-	-
More active compartments in Berkshire	16	73140000	73160000	-2.77347	-3.27401	0.500536	0.982395	-	-	-	-	-
More active compartments in Berkshire	16	73480000	73500000	-3.32904	-3.85374	0.524697	0.990233	-	-	-	-	-
More active compartments in Berkshire	16	73600000	73620000	-2.00214	-2.57436	0.572227	0.98426	-	-	-	-	-
More active compartments in Berkshire	16	73680000	73700000	-2.21795	-2.77919	0.56124	0.981061	-	-	-	-	-
More active compartments in Berkshire	16	73700000	73720000	-2.13692	-2.87113	0.734218	0.981475	-	-	-	-	-
More active compartments in Berkshire	16	73720000	73740000	-2.13481	-2.76927	0.634455	0.982717	-	-	-	-	-
More active compartments in Berkshire	16	73740000	73760000	-2.09411	-2.781	0.686884	0.986784	-	-	-	-	-
More active compartments in Berkshire	16	73760000	73780000	-2.19248	-3.0165	0.824017	0.983233	-	-	-	-	-
More active compartments in Berkshire	16	73780000	73800000	-2.17911	-3.19329	1.01418	0.980639	-	-	-	-	-
More active compartments in Berkshire	16	73800000	73820000	-1.90477	-3.11752	1.21275	0.983629	-	-	-	-	-
More active compartments in Berkshire	16	73820000	73840000	-1.96312	-3.23283	1.26971	0.985749	-	-	-	-	-
More active compartments in Berkshire	16	73840000	73860000	-2.36602	-3.32978	0.963756	0.990923	-	-	-	-	-
More active compartments in Berkshire	16	73860000	73880000	-2.50849	-3.15269	0.6442	0.978243	-	-	-	-	-
More active compartments in Berkshire	16	73880000	73900000	-2.49466	-3.35784	0.86318	0.981513	-	-	-	-	-
More active compartments in Berkshire	16	73900000	73920000	-2.60305	-3.27217	0.669119	0.9811	-	-	-	-	-
More active compartments in Berkshire	16	73920000	73940000	-2.57372	-3.11045	0.536728	0.982758	-	-	-	-	-
More active compartments in Berkshire	16	73940000	73960000	-2.46375	-3.01154	0.54779	0.987501	-	-	-	-	-
More active compartments in Berkshire	16	77840000	77860000	-2.32794	-3.01488	0.686946	0.991644	-	-	-	-	-
More active compartments in Berkshire	16	77860000	77880000	-2.26054	-2.90854	0.648003	0.98495	-	-	-	-	-
More active compartments in Berkshire	16	77880000	77900000	-1.97564	-2.95778	0.982138	0.987646	-	-	-	-	-
More active compartments in Berkshire	16	77900000	77920000	-1.85544	-2.9944	1.13895	0.979381	-	-	-	-	-
More active compartments in Berkshire	16	77920000	77940000	-2.10251	-3.13137	1.02886	0.98111	-	-	-	-	-
More active compartments in Berkshire	16	77940000	77960000	-2.10101	-3.06915	0.968135	0.985315	-	-	-	-	-
More active compartments in Berkshire	16	77960000	77980000	-2.3235	-3.05713	0.733629	0.986063	-	-	-	-	-
More active compartments in Berkshire	16	77980000	78000000	-2.25856	-3.06907	0.810503	0.988957	-	-	-	-	-
More active compartments in Berkshire	16	78000000	78020000	-2.3535	-3.0577	0.704195	0.990109	-	-	-	-	-
More active compartments in Berkshire	16	78020000	78040000	-2.42955	-3.00903	0.579482	0.980855	-	-	-	-	-
More active compartments in Berkshire	16	78080000	78100000	-2.44051	-2.95516	0.514655	0.991327	-	-	-	-	-
More active compartments in Berkshire	16	78120000	78140000	-2.70464	-3.22604	0.521408	0.986449	-	-	-	-	-
More active compartments in Berkshire	17	340000	360000	-5.86998	-6.53214	0.66216	0.9876	-	-	-	-	-
More active compartments in Berkshire	17	16580000	16600000	-4.32976	-4.85602	0.526263	0.982859	-	-	-	-	-
More active compartments in Berkshire	17	16660000	16680000	-4.16051	-4.68377	0.523268	0.982307	-	-	-	-	-
More active compartments in Berkshire	17	27500000	27520000	1.00876	0.423293	0.585464	0.983645	-	-	-	-	-
More active compartments in Berkshire	17	27620000	27640000	0.759234	0.223006	0.536227	0.984628	-	-	-	-	-
More active compartments in Berkshire	17	27700000	27720000	0.970762	0.380079	0.590683	0.990074	-	-	-	-	-
More active compartments in Berkshire	17	48680000	48700000	2.299	1.74823	0.550775	0.9941	ENSSSCG00000032191	Unknown	0.00924251	0.00924251	-
More active compartments in Berkshire	17	48980000	49000000	1.44994	0.915191	0.534744	0.9941	-	-	-	-	-
More active compartments in Berkshire	17	49040000	49060000	1.59773	1.03039	0.567338	0.989275	-	-	-	-	-
More active compartments in Berkshire	17	49060000	49080000	1.49453	0.821363	0.673172	0.983363	-	-	-	-	-
More active compartments in Berkshire	17	49120000	49140000	1.65301	1.11954	0.533469	0.988319	-	-	-	-	-
More active compartments in Berkshire	17	52320000	52340000	3.56025	3.05068	0.509576	0.998534	-	-	-	-	-
More active compartments in Berkshire	17	59760000	59780000	-0.79159	-1.43263	0.641042	0.991064	-	-	-	-	-
More active compartments in Berkshire	17	60300000	60320000	-0.744446	-1.33746	0.593015	0.993537	-	-	-	-	-
More active compartments in Berkshire	17	60380000	60400000	-1.27181	-1.88617	0.614358	0.99358	-	-	-	-	-
More active compartments in Berkshire	17	60420000	60440000	-1.2801	-1.89788	0.617774	0.994561	-	-	-	-	-
More active compartments in Berkshire	17	60500000	60520000	-1.65076	-2.18191	0.531151	0.991995	-	-	-	-	-
More active compartments in Berkshire	17	60600000	60620000	-1.8159	-2.5537	0.737799	0.987254	-	-	-	-	-
More active compartments in Berkshire	17	60720000	60740000	-1.57931	-2.20557	0.626255	0.989445	-	-	-	-	-
More active compartments in Berkshire	17	60760000	60780000	-1.23414	-1.96381	0.72967	0.992539	-	-	-	-	-
More active compartments in Berkshire	17	61280000	61300000	1.72204	1.01184	0.710204	0.990365	-	-	-	-	-
More active compartments in Berkshire	17	61300000	61320000	1.82498	1.22313	0.601853	0.983081	-	-	-	-	-
More active compartments in Berkshire	18	28180000	28200000	-1.65586	-2.16908	0.513212	0.992326	-	-	-	-	-
More active compartments in Berkshire	18	47400000	47420000	1.32966	0.813564	0.516096	0.977044	-	-	-	-	-
More active compartments in Berkshire	18	47460000	47480000	1.04753	0.394131	0.653403	0.982985	-	-	-	-	-
Tibetan-specific A compartments	1	3460000	3480000	-0.359444	0.61478	-0.974224	0.990046	-	-	-	-	-
Tibetan-specific A compartments	1	12520000	12540000	-0.198214	0.545289	-0.743503	0.987004	-	-	-	-	-
Tibetan-specific A compartments	1	12560000	12580000	-0.407584	0.562159	-0.969743	0.98599	-	-	-	-	-
Tibetan-specific A compartments	1	20540000	20560000	-0.308082	0.356385	-0.664467	0.987524	-	-	-	-	-
Tibetan-specific A compartments	1	33120000	33140000	-0.560822	0.187935	-0.748757	0.986544	-	-	-	-	-
Tibetan-specific A compartments	1	33140000	33160000	-0.336193	0.406695	-0.742887	0.992688	ENSSSCG00000004202	SAMD3	0.954502	1.04539	0.477276
Tibetan-specific A compartments	1	33740000	33760000	-0.233392	0.36393	-0.597322	0.992099	-	-	-	-	-
Tibetan-specific A compartments	1	36920000	36940000	-0.373786	0.308964	-0.68275	0.996912	-	-	-	-	-
Tibetan-specific A compartments	1	43140000	43160000	-0.324917	0.145641	-0.470559	0.99171	-	-	-	-	-
Tibetan-specific A compartments	1	63660000	63680000	-0.340579	0.342873	-0.683452	0.997959	-	-	-	-	-
Tibetan-specific A compartments	1	64060000	64080000	-0.263836	0.241059	-0.504894	0.99647	ENSSSCG00000027002	KLHL32	3.60269	2.74482	0.567575
Tibetan-specific A compartments	1	65860000	65880000	-0.309551	0.243039	-0.55259	0.990006	-	-	-	-	-
Tibetan-specific A compartments	1	65960000	65980000	-0.342125	0.112333	-0.454458	0.998826	-	-	-	-	-
Tibetan-specific A compartments	1	71380000	71400000	-0.28744	0.28408	-0.57152	0.993449	-	-	-	-	-
Tibetan-specific A compartments	1	79840000	79860000	-0.228225	0.221404	-0.449629	0.996364	-	-	-	-	-
Tibetan-specific A compartments	1	81840000	81860000	-0.526617	0.260955	-0.787572	0.991864	-	-	-	-	-
Tibetan-specific A compartments	1	82040000	82060000	-0.319064	0.347168	-0.666231	0.996846	-	-	-	-	-
Tibetan-specific A compartments	1	83140000	83160000	-0.495443	0.278007	-0.77345	0.994423	ENSSSCG00000026346	UBE3D	7.35896	7.61223	0.491541
Tibetan-specific A compartments	1	84240000	84260000	-0.208838	0.143373	-0.352211	0.99437	-	-	-	-	-
Tibetan-specific A compartments	1	84260000	84280000	-0.193034	0.123938	-0.316972	0.992066	-	-	-	-	-
Tibetan-specific A compartments	1	86600000	86620000	-0.198779	0.304453	-0.503233	0.994232	-	-	-	-	-
Tibetan-specific A compartments	1	94340000	94360000	-0.416802	0.0601555	-0.476957	0.996675	-	-	-	-	-
Tibetan-specific A compartments	1	94400000	94420000	-0.453619	0.288195	-0.741814	0.996872	ENSSSCG00000045948	Unknown	0.0902489	0.08148	-
Tibetan-specific A compartments	1	95420000	95440000	-0.703674	0.296354	-1.00003	0.995085	-	-	-	-	-
Tibetan-specific A compartments	1	95440000	95460000	-0.57629	0.253425	-0.829715	0.992839	-	-	-	-	-
Tibetan-specific A compartments	1	95460000	95480000	-0.342462	0.4159	-0.758363	0.991979	ENSSSCG00000004493	SIGLEC15	0.176569	0.176569	-
Tibetan-specific A compartments	1	96840000	96860000	-0.266154	0.29584	-0.561994	0.993819	ENSSSCG00000005767	SKOR2	0.00385757	0.00385757	-
Tibetan-specific A compartments	1	104280000	104300000	-0.374406	0.420614	-0.79502	0.994125	-	-	-	-	-
Tibetan-specific A compartments	1	104300000	104320000	-0.19836	0.577771	-0.776131	0.994697	-	-	-	-	-
Tibetan-specific A compartments	1	104320000	104340000	-0.411056	0.482517	-0.893574	0.995936	-	-	-	-	-
Tibetan-specific A compartments	1	104380000	104400000	-0.268604	0.577508	-0.846111	0.994662	-	-	-	-	-
Tibetan-specific A compartments	1	104400000	104420000	-0.394856	0.336154	-0.73101	0.99795	-	-	-	-	-
Tibetan-specific A compartments	1	105240000	105260000	-0.245595	0.328618	-0.574213	0.996536	-	-	-	-	-
Tibetan-specific A compartments	1	105700000	105720000	-0.707361	0.399407	-1.10677	0.995597	-	-	-	-	-
Tibetan-specific A compartments	1	105720000	105740000	-0.845767	0.304782	-1.15055	0.996564	-	-	-	-	-
Tibetan-specific A compartments	1	116100000	116120000	-0.175346	0.176232	-0.351578	0.996444	-	-	-	-	-
Tibetan-specific A compartments	1	136500000	136520000	-0.346719	0.593257	-0.939976	0.993958	-	-	-	-	-
Tibetan-specific A compartments	1	144460000	144480000	-0.302982	0.136024	-0.439006	0.996946	-	-	-	-	-
Tibetan-specific A compartments	1	147160000	147180000	-0.35061	0.0672388	-0.417849	0.993786	-	-	-	-	-
Tibetan-specific A compartments	1	147200000	147220000	-0.355576	0.169523	-0.525099	0.989975	-	-	-	-	-
Tibetan-specific A compartments	1	149880000	149900000	-0.435884	0.384175	-0.820058	0.992155	-	-	-	-	-
Tibetan-specific A compartments	1	157860000	157880000	-0.457056	0.411251	-0.868307	0.993039	ENSSSCG00000004889	SERPINB10	12.6586	15.3959	0.451214
Tibetan-specific A compartments	1	158020000	158040000	-0.310383	0.204525	-0.514908	0.997834	ENSSSCG00000022337	SERPINB11	0.0447116	0.0447116	-
Tibetan-specific A compartments	1	159780000	159800000	-0.13982	0.431411	-0.571231	0.995518	-	-	-	-	-
Tibetan-specific A compartments	1	159800000	159820000	-0.278605	0.376796	-0.655401	0.994889	-	-	-	-	-
Tibetan-specific A compartments	1	161140000	161160000	-0.378079	0.39688	-0.774959	0.992642	-	-	-	-	-
Tibetan-specific A compartments	1	168980000	169000000	-0.260916	0.193584	-0.454501	0.996236	-	-	-	-	-
Tibetan-specific A compartments	1	169020000	169040000	-0.392401	0.275249	-0.66765	0.995884	-	-	-	-	-
Tibetan-specific A compartments	1	169040000	169060000	-0.383826	0.230064	-0.613889	0.997513	-	-	-	-	-
Tibetan-specific A compartments	1	169080000	169100000	-0.289828	0.237911	-0.52774	0.995339	-	-	-	-	-
Tibetan-specific A compartments	1	169120000	169140000	-0.338401	0.352297	-0.690698	0.995771	-	-	-	-	-
Tibetan-specific A compartments	1	169140000	169160000	-0.294165	0.189524	-0.483689	0.997247	-	-	-	-	-
Tibetan-specific A compartments	1	169160000	169180000	-0.331947	0.378766	-0.710712	0.994545	-	-	-	-	-
Tibetan-specific A compartments	1	169180000	169200000	-0.331118	0.172543	-0.503661	0.995807	-	-	-	-	-
Tibetan-specific A compartments	1	169240000	169260000	-0.449011	0.213989	-0.663	0.993022	-	-	-	-	-
Tibetan-specific A compartments	1	185920000	185940000	-0.280958	0.187533	-0.468491	0.996257	-	-	-	-	-
Tibetan-specific A compartments	1	189640000	189660000	-0.326429	0.340819	-0.667248	0.994083	-	-	-	-	-
Tibetan-specific A compartments	1	190880000	190900000	-0.329865	0.108047	-0.437912	0.993753	ENSSSCG00000041512	Unknown	0.0589809	0.0589809	-
Tibetan-specific A compartments	1	200620000	200640000	-0.922496	0.323931	-1.24643	0.995442	-	-	-	-	-
Tibetan-specific A compartments	1	201800000	201820000	-1.17884	0.215245	-1.39408	0.997818	-	-	-	-	-
Tibetan-specific A compartments	1	201940000	201960000	-0.371793	0.488089	-0.859882	0.99917	-	-	-	-	-
Tibetan-specific A compartments	1	204080000	204100000	-0.543069	0.200921	-0.743989	0.997132	-	-	-	-	-
Tibetan-specific A compartments	1	205660000	205680000	-0.525759	0.25192	-0.777678	0.997629	-	-	-	-	-
Tibetan-specific A compartments	1	208680000	208700000	-0.316779	0.273121	-0.5899	0.997979	-	-	-	-	-
Tibetan-specific A compartments	1	208700000	208720000	-0.207633	0.248524	-0.456157	0.996918	-	-	-	-	-
Tibetan-specific A compartments	1	208800000	208820000	-0.41642	0.126665	-0.543085	0.99812	-	-	-	-	-
Tibetan-specific A compartments	1	217840000	217860000	-0.0811717	0.138708	-0.21988	0.991471	-	-	-	-	-
Tibetan-specific A compartments	1	218180000	218200000	-0.283282	0.158191	-0.441473	0.99663	-	-	-	-	-
Tibetan-specific A compartments	1	218400000	218420000	-0.23946	0.595885	-0.835345	0.998339	-	-	-	-	-
Tibetan-specific A compartments	1	219200000	219220000	-0.271188	0.234785	-0.505973	0.997411	ENSSSCG00000005229	VLDLR	9.56418	11.1624	0.461446
Tibetan-specific A compartments	1	223420000	223440000	-0.323795	0.0924846	-0.41628	0.994251	-	-	-	-	-
Tibetan-specific A compartments	1	223440000	223460000	-0.395824	0.361459	-0.757283	0.992956	-	-	-	-	-
Tibetan-specific A compartments	1	229660000	229680000	-0.403052	0.164284	-0.567335	0.993526	ENSSSCG00000005278	PRUNE2	1.09107	2.51733	0.30237
Tibetan-specific A compartments	1	229980000	230000000	-0.730264	0.233583	-0.963847	0.992292	-	-	-	-	-
Tibetan-specific A compartments	1	232500000	232520000	-0.391237	0.127881	-0.519117	0.996219	-	-	-	-	-
Tibetan-specific A compartments	1	248160000	248180000	-0.285055	0.239182	-0.524238	0.996136	-	-	-	-	-
Tibetan-specific A compartments	1	249120000	249140000	-0.210455	0.19073	-0.401185	0.991479	-	-	-	-	-
Tibetan-specific A compartments	1	250660000	250680000	-0.356874	0.391605	-0.748479	0.987264	-	-	-	-	-
Tibetan-specific A compartments	1	250680000	250700000	-0.311019	0.400017	-0.711035	0.990501	ENSSSCG00000033120	PALM2AKAP2	12.252	11.791	0.509588
Tibetan-specific A compartments	1	250700000	250720000	-0.336868	0.372865	-0.709733	0.988778	-	-	-	-	-
Tibetan-specific A compartments	1	250720000	250740000	-0.257208	0.279397	-0.536606	0.988558	-	-	-	-	-
Tibetan-specific A compartments	1	251960000	251980000	-0.336719	0.602965	-0.939684	0.989741	ENSSSCG00000005457	LPAR1	1.18003	0.931458	0.558863
Tibetan-specific A compartments	1	251980000	252000000	-0.436064	0.653298	-1.08936	0.98872	-	-	-	-	-
Tibetan-specific A compartments	1	252000000	252020000	-0.400642	0.764981	-1.16562	0.988732	-	-	-	-	-
Tibetan-specific A compartments	1	252040000	252060000	-0.385199	0.671263	-1.05646	0.987874	-	-	-	-	-
Tibetan-specific A compartments	1	252080000	252100000	-0.165917	0.661108	-0.827025	0.986901	-	-	-	-	-
Tibetan-specific A compartments	1	252100000	252120000	-0.264909	0.581053	-0.845962	0.983392	-	-	-	-	-
Tibetan-specific A compartments	1	252120000	252140000	-0.149632	0.657461	-0.807094	0.988918	-	-	-	-	-
Tibetan-specific A compartments	1	256720000	256740000	-0.503735	0.0831543	-0.586889	0.989002	-	-	-	-	-
Tibetan-specific A compartments	2	14560000	14580000	-0.195444	0.368499	-0.563943	0.991843	-	-	-	-	-
Tibetan-specific A compartments	2	18760000	18780000	-0.26462	0.275387	-0.540007	0.987746	-	-	-	-	-
Tibetan-specific A compartments	2	18820000	18840000	-0.205986	0.347195	-0.553181	0.998375	-	-	-	-	-
Tibetan-specific A compartments	2	45800000	45820000	-0.134085	0.675204	-0.809288	0.992848	-	-	-	-	-
Tibetan-specific A compartments	2	47720000	47740000	-0.20812	0.458228	-0.666348	0.985265	-	-	-	-	-
Tibetan-specific A compartments	2	84140000	84160000	-0.188039	0.335395	-0.523434	0.99257	ENSSSCG00000014078	RPS17	0.0338835	0.0338835	-
Tibetan-specific A compartments	2	84160000	84180000	-0.286877	0.279557	-0.566435	0.993505	-	-	-	-	-
Tibetan-specific A compartments	2	84820000	84840000	-0.200926	0.357296	-0.558222	0.994201	-	-	-	-	-
Tibetan-specific A compartments	2	84980000	85000000	-0.572516	0.0717599	-0.644276	0.992861	ENSSSCG00000034062	SV2C	0.751092	0.618111	0.548562
Tibetan-specific A compartments	2	85020000	85040000	-0.427658	0.269059	-0.696717	0.994831	-	-	-	-	-
Tibetan-specific A compartments	2	86480000	86500000	-0.24245	0.363888	-0.606338	0.99753	-	-	-	-	-
Tibetan-specific A compartments	2	89180000	89200000	-0.416957	0.521247	-0.938204	0.990614	-	-	-	-	-
Tibetan-specific A compartments	2	89200000	89220000	-0.270366	0.505072	-0.775439	0.990633	-	-	-	-	-
Tibetan-specific A compartments	2	90200000	90220000	-0.459488	0.231895	-0.691382	0.993405	-	-	-	-	-
Tibetan-specific A compartments	2	90220000	90240000	-0.396814	0.510326	-0.90714	0.996196	-	-	-	-	-
Tibetan-specific A compartments	2	90240000	90260000	-0.306209	0.352341	-0.65855	0.994515	-	-	-	-	-
Tibetan-specific A compartments	2	90280000	90300000	-0.237262	0.543002	-0.780264	0.994532	-	-	-	-	-
Tibetan-specific A compartments	2	90320000	90340000	-0.431102	0.287515	-0.718616	0.99523	-	-	-	-	-
Tibetan-specific A compartments	2	117340000	117360000	-0.264388	0.675066	-0.939454	0.994297	-	-	-	-	-
Tibetan-specific A compartments	2	117360000	117380000	-0.276914	0.594612	-0.871527	0.996123	-	-	-	-	-
Tibetan-specific A compartments	2	117380000	117400000	-0.279577	0.487055	-0.766632	0.996436	-	-	-	-	-
Tibetan-specific A compartments	2	117420000	117440000	-0.174369	0.750472	-0.924841	0.991258	-	-	-	-	-
Tibetan-specific A compartments	2	117840000	117860000	-0.565412	0.646012	-1.21142	0.994781	-	-	-	-	-
Tibetan-specific A compartments	2	117860000	117880000	-0.379842	0.590804	-0.970646	0.994755	ENSSSCG00000014211	YTHDC2	19.9114	22.8527	0.46561
Tibetan-specific A compartments	2	134100000	134120000	-0.491509	0.302651	-0.79416	0.995758	-	-	-	-	-
Tibetan-specific A compartments	2	139820000	139840000	-0.379223	0.43231	-0.811533	0.997251	ENSSSCG00000014323	Unknown	0.0140488	0.0140488	-
Tibetan-specific A compartments	2	139880000	139900000	-0.448035	0.610285	-1.05832	0.996436	-	-	-	-	-
Tibetan-specific A compartments	3	3300000	3320000	-0.52614	0.538175	-1.06432	0.981876	-	-	-	-	-
Tibetan-specific A compartments	3	3340000	3360000	-0.341885	0.329626	-0.671512	0.977324	-	-	-	-	-
Tibetan-specific A compartments	3	6700000	6720000	-0.487766	0.417805	-0.90557	0.993339	-	-	-	-	-
Tibetan-specific A compartments	3	6720000	6740000	-0.702534	0.346608	-1.04914	0.993573	-	-	-	-	-
Tibetan-specific A compartments	3	6740000	6760000	-0.82032	0.770936	-1.59126	0.989384	-	-	-	-	-
Tibetan-specific A compartments	3	6760000	6780000	-0.905425	0.844849	-1.75027	0.992068	-	-	-	-	-
Tibetan-specific A compartments	3	6780000	6800000	-0.804057	0.752202	-1.55626	0.9876	ENSSSCG00000038518	Unknown	0.0826408	0.0826408	-
Tibetan-specific A compartments	3	13900000	13920000	-0.302341	0.190961	-0.493302	0.993886	-	-	-	-	-
Tibetan-specific A compartments	3	14020000	14040000	-0.160334	0.221751	-0.382085	0.989358	-	-	-	-	-
Tibetan-specific A compartments	3	14100000	14120000	-0.129187	0.291767	-0.420954	0.988491	-	-	-	-	-
Tibetan-specific A compartments	3	14280000	14300000	-0.263595	0.172567	-0.436162	0.987934	-	-	-	-	-
Tibetan-specific A compartments	3	15980000	16000000	-0.377053	0.32763	-0.704683	0.988719	-	-	-	-	-
Tibetan-specific A compartments	3	22960000	22980000	-0.313928	0.3736	-0.687528	0.990847	-	-	-	-	-
Tibetan-specific A compartments	3	25160000	25180000	-0.321991	0.390051	-0.712042	0.995157	-	-	-	-	-
Tibetan-specific A compartments	3	25260000	25280000	-0.147241	0.519226	-0.666467	0.99155	-	-	-	-	-
Tibetan-specific A compartments	3	25900000	25920000	-0.176843	0.312637	-0.489481	0.989027	-	-	-	-	-
Tibetan-specific A compartments	3	28120000	28140000	-0.289162	0.32726	-0.616422	0.996545	-	-	-	-	-
Tibetan-specific A compartments	3	32380000	32400000	-0.384661	0.222031	-0.606693	0.991273	-	-	-	-	-
Tibetan-specific A compartments	3	37200000	37220000	-0.411369	0.432052	-0.84342	0.994762	ENSSSCG00000007917	RBFOX1	0.114081	0.114081	-
Tibetan-specific A compartments	3	52780000	52800000	-0.429566	0.2423	-0.671866	0.992592	-	-	-	-	-
Tibetan-specific A compartments	3	52800000	52820000	-0.54824	0.281441	-0.82968	0.99364	-	-	-	-	-
Tibetan-specific A compartments	3	53320000	53340000	-0.603838	0.350772	-0.95461	0.986545	-	-	-	-	-
Tibetan-specific A compartments	3	92680000	92700000	-0.388782	0.329616	-0.718398	0.996651	ENSSSCG00000029485	FBXO11	20.0647	20.2147	0.498138
Tibetan-specific A compartments	3	94260000	94280000	-1.52284	1.62602	-3.14886	0.998983	-	-	-	-	-
Tibetan-specific A compartments	3	94280000	94300000	-1.75299	2.35481	-4.1078	0.996636	-	-	-	-	-
Tibetan-specific A compartments	3	94300000	94320000	-1.48981	2.36178	-3.85159	0.998317	-	-	-	-	-
Tibetan-specific A compartments	3	110280000	110300000	-0.285505	0.381045	-0.66655	0.979477	-	-	-	-	-
Tibetan-specific A compartments	3	132480000	132500000	-0.253061	0.393307	-0.646368	0.996845	-	-	-	-	-
Tibetan-specific A compartments	4	16660000	16680000	-0.317108	0.43185	-0.748958	0.991711	-	-	-	-	-
Tibetan-specific A compartments	4	18700000	18720000	-0.169737	0.748922	-0.918659	0.987539	-	-	-	-	-
Tibetan-specific A compartments	4	22060000	22080000	-0.281106	0.308545	-0.589651	0.998687	-	-	-	-	-
Tibetan-specific A compartments	4	33840000	33860000	-0.641698	0.306491	-0.948189	0.990409	ENSSSCG00000006052;ENSSSCG00000047822	FZD6;Unknown	23.0958485239986;-	16.152475241168;-	0.588454392656037;-
Tibetan-specific A compartments	4	33860000	33880000	-0.335333	0.163087	-0.498419	0.989202	-	-	-	-	-
Tibetan-specific A compartments	4	33900000	33920000	-0.302734	0.388291	-0.691025	0.986001	-	-	-	-	-
Tibetan-specific A compartments	4	33920000	33940000	-0.458264	0.242917	-0.701181	0.989802	-	-	-	-	-
Tibetan-specific A compartments	4	33960000	33980000	-0.441878	0.360136	-0.802014	0.988193	-	-	-	-	-
Tibetan-specific A compartments	4	42320000	42340000	-0.594808	0.17013	-0.764938	0.996447	-	-	-	-	-
Tibetan-specific A compartments	4	42740000	42760000	-0.536949	0.039149	-0.576098	0.995994	-	-	-	-	-
Tibetan-specific A compartments	4	42760000	42780000	-0.375935	0.435173	-0.811109	0.997957	ENSSSCG00000006107	PDP1	11.7624	14.0945	0.454903
Tibetan-specific A compartments	4	50540000	50560000	-0.253649	0.232719	-0.486368	0.997354	-	-	-	-	-
Tibetan-specific A compartments	4	51140000	51160000	-0.388096	0.211076	-0.599171	0.991884	-	-	-	-	-
Tibetan-specific A compartments	4	55940000	55960000	-0.327398	0.323631	-0.651029	0.989123	-	-	-	-	-
Tibetan-specific A compartments	4	62160000	62180000	-0.232157	0.121443	-0.3536	0.997926	-	-	-	-	-
Tibetan-specific A compartments	4	72360000	72380000	-0.202643	0.173058	-0.375701	0.988931	-	-	-	-	-
Tibetan-specific A compartments	4	74460000	74480000	-0.500187	0.275845	-0.776032	0.98889	-	-	-	-	-
Tibetan-specific A compartments	4	74640000	74660000	-0.871728	0.354821	-1.22655	0.988709	-	-	-	-	-
Tibetan-specific A compartments	4	80980000	81000000	-0.0865674	0.366389	-0.452956	0.99553	-	-	-	-	-
Tibetan-specific A compartments	4	91120000	91140000	-0.172671	0.322471	-0.495142	0.99562	ENSSSCG00000006413	FCER1A	-	-	-
Tibetan-specific A compartments	4	96500000	96520000	-0.425766	0.103333	-0.529099	0.999086	-	-	-	-	-
Tibetan-specific A compartments	4	120000000	120020000	-0.437613	0.271126	-0.708738	0.990361	-	-	-	-	-
Tibetan-specific A compartments	4	125640000	125660000	-0.463005	0.370331	-0.833336	0.985285	-	-	-	-	-
Tibetan-specific A compartments	4	125880000	125900000	-0.58929	0.350262	-0.939552	0.990225	-	-	-	-	-
Tibetan-specific A compartments	4	126620000	126640000	-0.786605	0.239768	-1.02637	0.983947	-	-	-	-	-
Tibetan-specific A compartments	4	128860000	128880000	-0.569833	0.265411	-0.835244	0.991255	-	-	-	-	-
Tibetan-specific A compartments	4	129600000	129620000	-0.543171	0.271776	-0.814947	0.993362	-	-	-	-	-
Tibetan-specific A compartments	4	129640000	129660000	-0.451279	0.528169	-0.979449	0.989383	ENSSSCG00000006933	CLCA1	0.0919272	0.0580906	-
Tibetan-specific A compartments	5	27140000	27160000	-0.232784	0.243919	-0.476704	0.994936	-	-	-	-	-
Tibetan-specific A compartments	5	51500000	51520000	-0.173866	0.228363	-0.402229	0.995325	-	-	-	-	-
Tibetan-specific A compartments	5	58040000	58060000	-0.557763	0.411801	-0.969564	0.997651	-	-	-	-	-
Tibetan-specific A compartments	5	58060000	58080000	-0.474872	0.440322	-0.915195	0.995881	-	-	-	-	-
Tibetan-specific A compartments	5	58080000	58100000	-0.462594	0.655934	-1.11853	0.997004	-	-	-	-	-
Tibetan-specific A compartments	5	59460000	59480000	-0.610299	0.443894	-1.05419	0.986284	-	-	-	-	-
Tibetan-specific A compartments	5	59480000	59500000	-0.172561	0.671968	-0.844529	0.982652	ENSSSCG00000000619;ENSSSCG00000040275	FAM234B;HEBP1	1.57462276249815;265.864946405766	1.37578427171518;194.556859776567	0.533696789710235;0.57743778169464
Tibetan-specific A compartments	5	59520000	59540000	-0.46023	0.489374	-0.949604	0.986974	ENSSSCG00000029545	GPRC5D	0.0873528	0.0873528	-
Tibetan-specific A compartments	5	59540000	59560000	-0.513805	0.269653	-0.783458	0.987329	-	-	-	-	-
Tibetan-specific A compartments	5	59580000	59600000	-0.434732	0.530644	-0.965376	0.991547	ENSSSCG00000029592	GPRC5A	0.313147	0.17624	-
Tibetan-specific A compartments	5	60840000	60860000	-0.187601	0.237938	-0.425538	0.991202	-	-	-	-	-
Tibetan-specific A compartments	5	61760000	61780000	-0.634468	0.113707	-0.748175	0.992056	ENSSSCG00000000645	GABARAPL1	81.5027	100.559	0.447664
Tibetan-specific A compartments	5	61820000	61840000	-0.458178	0.16283	-0.621008	0.989989	ENSSSCG00000000648	CLEC7A	1.50762	2.30251	0.395687
Tibetan-specific A compartments	5	61840000	61860000	-0.475687	0.278319	-0.754005	0.983368	ENSSSCG00000000649	CLEC1A	1.52368	1.63113	0.48297
Tibetan-specific A compartments	5	61860000	61880000	-0.485492	0.215127	-0.700619	0.987083	ENSSSCG00000000651	CLEC12B	1.87313	1.44989	0.563683
Tibetan-specific A compartments	5	62060000	62080000	-0.673437	0.298848	-0.972285	0.993542	ENSSSCG00000000653	CD69	1.36351	2.01083	0.404083
Tibetan-specific A compartments	5	62080000	62100000	-0.411913	0.526837	-0.93875	0.990686	-	-	-	-	-
Tibetan-specific A compartments	5	62660000	62680000	-0.228333	0.595758	-0.824091	0.994994	-	-	-	-	-
Tibetan-specific A compartments	5	62800000	62820000	-0.471119	0.617621	-1.08874	0.99086	-	-	-	-	-
Tibetan-specific A compartments	5	62820000	62840000	-0.461749	0.498639	-0.960388	0.981862	ENSSSCG00000000668	APOBEC1	2.14822	1.27302	0.627907
Tibetan-specific A compartments	5	62840000	62860000	-0.595154	0.632273	-1.22743	0.984551	ENSSSCG00000000669	GDF3	0.00930478	0.00930478	-
Tibetan-specific A compartments	5	62860000	62880000	-0.532832	0.611125	-1.14396	0.993435	-	-	-	-	-
Tibetan-specific A compartments	5	62900000	62920000	-0.560142	0.561255	-1.1214	0.986345	ENSSSCG00000047604	Unknown	-	-	-
Tibetan-specific A compartments	5	62920000	62940000	-0.698758	0.470949	-1.16971	0.98989	ENSSSCG00000040403	NANOG	0.163447	0.163447	-
Tibetan-specific A compartments	5	62940000	62960000	-0.619563	0.601925	-1.22149	0.991483	-	-	-	-	-
Tibetan-specific A compartments	5	62960000	62980000	-0.450073	0.715295	-1.16537	0.995359	-	-	-	-	-
Tibetan-specific A compartments	5	63100000	63120000	-0.44973	0.58374	-1.03347	0.990174	-	-	-	-	-
Tibetan-specific A compartments	5	63120000	63140000	-0.809251	0.40489	-1.21414	0.995538	ENSSSCG00000025179	NECAP1	28.1667	26.7146	0.51323
Tibetan-specific A compartments	5	90980000	91000000	-0.0992716	0.425499	-0.524771	0.984917	-	-	-	-	-
Tibetan-specific A compartments	5	91080000	91100000	-0.139623	0.270025	-0.409648	0.984694	-	-	-	-	-
Tibetan-specific A compartments	5	93040000	93060000	-0.371002	0.202414	-0.573416	0.989094	-	-	-	-	-
Tibetan-specific A compartments	6	13900000	13920000	-0.456083	0.165134	-0.621217	0.981575	-	-	-	-	-
Tibetan-specific A compartments	6	16000000	16020000	-0.404334	0.136734	-0.541069	0.990839	-	-	-	-	-
Tibetan-specific A compartments	6	31340000	31360000	-0.151388	0.180701	-0.332089	0.98472	-	-	-	-	-
Tibetan-specific A compartments	6	31360000	31380000	-0.141445	0.0711055	-0.212551	0.991502	-	-	-	-	-
Tibetan-specific A compartments	6	37080000	37100000	-0.308724	0.318257	-0.626981	0.993383	-	-	-	-	-
Tibetan-specific A compartments	6	37100000	37120000	-0.203293	0.214546	-0.417839	0.992144	-	-	-	-	-
Tibetan-specific A compartments	6	56900000	56920000	-0.342719	0.331932	-0.674651	0.998828	ENSSSCG00000042660	Unknown	0	0	-
Tibetan-specific A compartments	6	73000000	73020000	-0.3129	0.403688	-0.716588	0.984612	ENSSSCG00000003451	PDPN	0.256084	0.390465	-
Tibetan-specific A compartments	6	73960000	73980000	-0.350896	0.144341	-0.495237	0.991121	-	-	-	-	-
Tibetan-specific A compartments	6	74000000	74020000	-0.244588	0.308471	-0.553059	0.989905	-	-	-	-	-
Tibetan-specific A compartments	6	106060000	106080000	-0.266667	0.23037	-0.497037	0.999228	-	-	-	-	-
Tibetan-specific A compartments	6	106080000	106100000	-0.171112	0.418471	-0.589582	0.998675	-	-	-	-	-
Tibetan-specific A compartments	6	106520000	106540000	-0.419133	0.129492	-0.548625	0.998079	-	-	-	-	-
Tibetan-specific A compartments	6	144900000	144920000	-0.49301	0.387351	-0.880361	0.988077	-	-	-	-	-
Tibetan-specific A compartments	6	164340000	164360000	-0.930617	0.880196	-1.81081	0.98798	-	-	-	-	-
Tibetan-specific A compartments	6	164360000	164380000	-0.787637	0.658096	-1.44573	0.992145	ENSSSCG00000031778	CYP4X1	0.0270652	0.0270652	-
Tibetan-specific A compartments	6	164380000	164400000	-1.33321	0.738188	-2.0714	0.993643	-	-	-	-	-
Tibetan-specific A compartments	6	164420000	164440000	-1.34945	0.59434	-1.94379	0.995023	-	-	-	-	-
Tibetan-specific A compartments	6	164440000	164460000	-1.56254	0.558694	-2.12123	0.993609	-	-	-	-	-
Tibetan-specific A compartments	6	164460000	164480000	-1.90144	0.806807	-2.70824	0.996793	ENSSSCG00000024129	CYP4X1	0.0565066	0.0565066	-
Tibetan-specific A compartments	6	164540000	164560000	-1.84096	1.28388	-3.12484	0.999431	-	-	-	-	-
Tibetan-specific A compartments	6	164620000	164640000	-1.74032	1.22603	-2.96634	0.999697	-	-	-	-	-
Tibetan-specific A compartments	7	5440000	5460000	-0.511306	0.132782	-0.644088	0.984467	-	-	-	-	-
Tibetan-specific A compartments	7	7260000	7280000	-0.600976	0.0836967	-0.684673	0.982765	-	-	-	-	-
Tibetan-specific A compartments	7	9120000	9140000	-0.321025	0.470955	-0.79198	0.986214	-	-	-	-	-
Tibetan-specific A compartments	7	9180000	9200000	-0.347833	0.542668	-0.890501	0.983592	-	-	-	-	-
Tibetan-specific A compartments	7	12820000	12840000	-0.194887	0.308861	-0.503748	0.986664	-	-	-	-	-
Tibetan-specific A compartments	7	12840000	12860000	-0.295037	0.171707	-0.466745	0.987	-	-	-	-	-
Tibetan-specific A compartments	7	12880000	12900000	-0.350302	0.146909	-0.497211	0.992678	-	-	-	-	-
Tibetan-specific A compartments	7	12920000	12940000	-0.223366	0.137756	-0.361122	0.991081	-	-	-	-	-
Tibetan-specific A compartments	7	15980000	16000000	-0.320515	0.380896	-0.701411	0.990605	-	-	-	-	-
Tibetan-specific A compartments	7	16020000	16040000	-0.374068	0.251196	-0.625264	0.988831	-	-	-	-	-
Tibetan-specific A compartments	7	16080000	16100000	-0.406782	0.216515	-0.623297	0.99148	-	-	-	-	-
Tibetan-specific A compartments	7	16300000	16320000	-0.230762	0.407315	-0.638077	0.990172	-	-	-	-	-
Tibetan-specific A compartments	7	16400000	16420000	-0.35125	0.0553909	-0.406641	0.99521	-	-	-	-	-
Tibetan-specific A compartments	7	16460000	16480000	-0.26081	0.363718	-0.624528	0.992765	-	-	-	-	-
Tibetan-specific A compartments	7	16480000	16500000	-0.182781	0.282141	-0.464922	0.989365	-	-	-	-	-
Tibetan-specific A compartments	7	16520000	16540000	-0.230439	0.283384	-0.513823	0.992908	-	-	-	-	-
Tibetan-specific A compartments	7	16680000	16700000	-0.427001	0.179765	-0.606766	0.990416	-	-	-	-	-
Tibetan-specific A compartments	7	16880000	16900000	-0.224757	0.196331	-0.421087	0.995845	-	-	-	-	-
Tibetan-specific A compartments	7	20200000	20220000	-0.533108	0.681105	-1.21421	0.987362	-	-	-	-	-
Tibetan-specific A compartments	7	20240000	20260000	-0.471271	0.564295	-1.03557	0.985369	-	-	-	-	-
Tibetan-specific A compartments	7	20340000	20360000	-0.47041	0.571124	-1.04153	0.98234	-	-	-	-	-
Tibetan-specific A compartments	7	20480000	20500000	-0.719042	0.338365	-1.05741	0.992074	ENSSSCG00000031944	SLC17A4	32.8788	37.1788	0.469311
Tibetan-specific A compartments	7	20500000	20520000	-0.603518	0.415866	-1.01938	0.994498	ENSSSCG00000046594	Unknown	1.54438	1.79364	0.462664
Tibetan-specific A compartments	7	20540000	20560000	-0.389428	0.271563	-0.660991	0.992706	-	-	-	-	-
Tibetan-specific A compartments	7	20560000	20580000	-0.498889	0.524409	-1.0233	0.996892	ENSSSCG00000001107	SLC17A1	2.69192	2.07485	0.564726
Tibetan-specific A compartments	7	20580000	20600000	-0.442005	0.60858	-1.05059	0.99869	-	-	-	-	-
Tibetan-specific A compartments	7	40980000	41000000	-0.387248	0.318633	-0.705881	0.990506	-	-	-	-	-
Tibetan-specific A compartments	7	41320000	41340000	-0.390039	0.321751	-0.71179	0.983252	-	-	-	-	-
Tibetan-specific A compartments	7	41340000	41360000	-0.145255	0.21938	-0.364635	0.982044	-	-	-	-	-
Tibetan-specific A compartments	7	59980000	60000000	-0.235654	0.475585	-0.711239	0.996301	-	-	-	-	-
Tibetan-specific A compartments	7	60260000	60280000	-0.118744	0.243888	-0.362631	0.996375	-	-	-	-	-
Tibetan-specific A compartments	7	76480000	76500000	-0.219252	0.608962	-0.828214	0.99615	-	-	-	-	-
Tibetan-specific A compartments	7	76500000	76520000	-0.31492	0.418266	-0.733186	0.998167	-	-	-	-	-
Tibetan-specific A compartments	7	77620000	77640000	-0.26272	0.732805	-0.995524	0.997766	ENSSSCG00000022705	SALL2	6.72169	7.55431	0.470839
Tibetan-specific A compartments	7	78200000	78220000	-0.306127	0.673026	-0.979153	0.995504	ENSSSCG00000031649	RNASE1	0.838513	0.546014	0.605631
Tibetan-specific A compartments	7	114960000	114980000	-0.335999	0.494795	-0.830794	0.99524	-	-	-	-	-
Tibetan-specific A compartments	7	114980000	115000000	-0.297155	0.283461	-0.580616	0.994265	-	-	-	-	-
Tibetan-specific A compartments	7	115460000	115480000	-0.322223	0.351763	-0.673987	0.986347	-	-	-	-	-
Tibetan-specific A compartments	8	7360000	7380000	-0.723491	0.339557	-1.06305	0.984651	-	-	-	-	-
Tibetan-specific A compartments	8	7380000	7400000	-0.703941	0.237935	-0.941876	0.984807	-	-	-	-	-
Tibetan-specific A compartments	8	7400000	7420000	-0.676558	0.315182	-0.99174	0.987246	-	-	-	-	-
Tibetan-specific A compartments	8	75260000	75280000	-0.360949	0.159995	-0.520944	0.990498	-	-	-	-	-
Tibetan-specific A compartments	8	81240000	81260000	-0.384452	0.633092	-1.01754	0.992191	-	-	-	-	-
Tibetan-specific A compartments	8	81260000	81280000	-0.533959	0.465657	-0.999616	0.996821	ENSSSCG00000009031	EDNRA	5.34556	6.22798	0.461878
Tibetan-specific A compartments	8	81620000	81640000	-0.448061	0.604427	-1.05249	0.993385	-	-	-	-	-
Tibetan-specific A compartments	8	81660000	81680000	-0.373502	0.520498	-0.894	0.992557	-	-	-	-	-
Tibetan-specific A compartments	8	81720000	81740000	-0.506408	0.421742	-0.92815	0.987946	ENSSSCG00000043686	Unknown	0.178302	0.178302	-
Tibetan-specific A compartments	8	82060000	82080000	-0.292584	0.466787	-0.759371	0.988312	-	-	-	-	-
Tibetan-specific A compartments	8	95900000	95920000	-0.28748	0.230285	-0.517765	0.997008	-	-	-	-	-
Tibetan-specific A compartments	8	99260000	99280000	-0.34326	0.225872	-0.569132	0.994878	-	-	-	-	-
Tibetan-specific A compartments	8	122080000	122100000	-0.280043	0.399264	-0.679307	0.989491	-	-	-	-	-
Tibetan-specific A compartments	8	137480000	137500000	-0.78193	0.532263	-1.31419	0.988591	ENSSSCG00000037723	CFAP299	2.81018	4.08185	0.407743
Tibetan-specific A compartments	8	137520000	137540000	-0.804985	0.544525	-1.34951	0.99036	-	-	-	-	-
Tibetan-specific A compartments	8	137940000	137960000	-0.414579	0.773677	-1.18826	0.991981	-	-	-	-	-
Tibetan-specific A compartments	8	137960000	137980000	-0.541764	0.881252	-1.42302	0.984047	-	-	-	-	-
Tibetan-specific A compartments	8	138560000	138580000	-1.41273	0.335961	-1.74869	0.996232	-	-	-	-	-
Tibetan-specific A compartments	8	138580000	138600000	-0.852764	0.829479	-1.68224	0.995706	-	-	-	-	-
Tibetan-specific A compartments	9	1240000	1260000	-0.497349	0.317404	-0.814753	0.988733	-	-	-	-	-
Tibetan-specific A compartments	9	32800000	32820000	-0.167245	0.215481	-0.382726	0.993409	ENSSSCG00000031429	YAP1	26.7248	26.0857	0.506051
Tibetan-specific A compartments	9	36140000	36160000	-0.342193	0.538903	-0.881096	0.992362	ENSSSCG00000015002	ELMOD1	0.226565	1.72814	0.115907
Tibetan-specific A compartments	9	36160000	36180000	-0.484317	0.337787	-0.822104	0.995973	-	-	-	-	-
Tibetan-specific A compartments	9	36180000	36200000	-0.469787	0.181017	-0.650804	0.991864	-	-	-	-	-
Tibetan-specific A compartments	9	36200000	36220000	-0.468158	0.236982	-0.70514	0.996187	-	-	-	-	-
Tibetan-specific A compartments	9	36280000	36300000	-0.11572	0.488233	-0.603953	0.998621	-	-	-	-	-
Tibetan-specific A compartments	9	36320000	36340000	-0.108087	0.554921	-0.663008	0.991387	-	-	-	-	-
Tibetan-specific A compartments	9	37200000	37220000	-0.252096	0.451135	-0.703231	0.988446	-	-	-	-	-
Tibetan-specific A compartments	9	37220000	37240000	-0.222013	0.379188	-0.601202	0.993823	-	-	-	-	-
Tibetan-specific A compartments	9	37240000	37260000	-0.245649	0.349044	-0.594692	0.99602	-	-	-	-	-
Tibetan-specific A compartments	9	37260000	37280000	-0.26131	0.318635	-0.579945	0.992113	-	-	-	-	-
Tibetan-specific A compartments	9	37280000	37300000	-0.410676	0.351986	-0.762662	0.991409	-	-	-	-	-
Tibetan-specific A compartments	9	37300000	37320000	-0.497311	0.347354	-0.844665	0.993978	-	-	-	-	-
Tibetan-specific A compartments	9	37960000	37980000	-0.284528	0.275012	-0.55954	0.990421	-	-	-	-	-
Tibetan-specific A compartments	9	55600000	55620000	-0.270131	0.440942	-0.711072	0.991679	ENSSSCG00000015237	FLI1	11.2867	11.3965	0.497578
Tibetan-specific A compartments	9	55700000	55720000	-0.362026	0.536953	-0.89898	0.996183	-	-	-	-	-
Tibetan-specific A compartments	9	55740000	55760000	-0.394051	0.538066	-0.932117	0.991106	-	-	-	-	-
Tibetan-specific A compartments	9	83400000	83420000	-0.292453	0.171141	-0.463594	0.997772	ENSSSCG00000024591	ETV1	22.4446	22.4556	0.499878
Tibetan-specific A compartments	9	86180000	86200000	-0.154494	0.172268	-0.326761	0.990321	-	-	-	-	-
Tibetan-specific A compartments	9	86280000	86300000	-0.271163	0.221432	-0.492595	0.993663	-	-	-	-	-
Tibetan-specific A compartments	9	86320000	86340000	-0.243102	0.155771	-0.398874	0.989685	-	-	-	-	-
Tibetan-specific A compartments	9	86340000	86360000	-0.144359	0.125547	-0.269907	0.99091	ENSSSCG00000048277	Unknown	-	-	-
Tibetan-specific A compartments	9	90700000	90720000	-0.445395	0.124937	-0.570332	0.994245	-	-	-	-	-
Tibetan-specific A compartments	9	90720000	90740000	-0.188262	0.226528	-0.41479	0.995244	-	-	-	-	-
Tibetan-specific A compartments	9	108280000	108300000	-0.473718	0.358051	-0.831769	0.986162	-	-	-	-	-
Tibetan-specific A compartments	9	108300000	108320000	-0.336463	0.755405	-1.09187	0.991728	-	-	-	-	-
Tibetan-specific A compartments	9	114300000	114320000	-0.303483	0.741049	-1.04453	0.993788	-	-	-	-	-
Tibetan-specific A compartments	9	114340000	114360000	-0.397896	0.848819	-1.24672	0.983867	-	-	-	-	-
Tibetan-specific A compartments	9	114380000	114400000	-0.334046	0.661612	-0.995658	0.996098	-	-	-	-	-
Tibetan-specific A compartments	9	114540000	114560000	-0.456124	0.828613	-1.28474	0.995031	-	-	-	-	-
Tibetan-specific A compartments	9	114580000	114600000	-0.516091	0.87869	-1.39478	0.997148	-	-	-	-	-
Tibetan-specific A compartments	9	114700000	114720000	-0.454027	0.803824	-1.25785	0.996518	-	-	-	-	-
Tibetan-specific A compartments	9	115720000	115740000	-0.494475	0.57703	-1.07151	0.991857	-	-	-	-	-
[truncated: 2,015 more rows]

## Sheet: Sheet 3 (Muscle)
Differential compartments between breeds	Chromosome	Start	End	Mean A-B index of Berkshire	Mean A-B index of Tibetan	ΔA-B index (Berkshire – Tibetan)	Identity score	Gene Ensembl ID	Gene symbol	Berkshire TPM	Tibetan TPM	Allelic expression ratio of Berkshire
Berkshire-specific A compartments	1	3560000	3580000	0.530053	-0.336831	0.866884	0.982609	-	-	-	-	-
Berkshire-specific A compartments	1	25620000	25640000	0.314622	-0.0425241	0.357146	0.989885	-	-	-	-	-
Berkshire-specific A compartments	1	25820000	25840000	0.268496	-0.220437	0.488932	0.993992	-	-	-	-	-
Berkshire-specific A compartments	1	26280000	26300000	0.389093	-0.247916	0.637009	0.981901	-	-	-	-	-
Berkshire-specific A compartments	1	28740000	28760000	0.608776	-0.244595	0.853371	0.993332	-	-	-	-	-
Berkshire-specific A compartments	1	28820000	28840000	0.479293	-0.322032	0.801325	0.992062	-	-	-	-	-
Berkshire-specific A compartments	1	35160000	35180000	0.347098	-0.0588519	0.40595	0.992011	-	-	-	-	-
Berkshire-specific A compartments	1	45040000	45060000	0.208505	-0.153512	0.362017	0.994052	-	-	-	-	-
Berkshire-specific A compartments	1	53480000	53500000	0.100974	-0.0478447	0.148819	0.995167	-	-	-	-	-
Berkshire-specific A compartments	1	53500000	53520000	0.242679	-0.117622	0.360301	0.992362	-	-	-	-	-
Berkshire-specific A compartments	1	54220000	54240000	0.205651	-0.281362	0.487012	0.992341	-	-	-	-	-
Berkshire-specific A compartments	1	63960000	63980000	0.166929	-0.420069	0.586998	0.99449	ENSSSCG00000035240	GPR63	0.971412	0.884105	0.523526
Berkshire-specific A compartments	1	66900000	66920000	0.629089	-0.273766	0.902856	0.995766	-	-	-	-	-
Berkshire-specific A compartments	1	66920000	66940000	0.56905	-0.0954172	0.664467	0.997615	-	-	-	-	-
Berkshire-specific A compartments	1	105900000	105920000	0.124871	-0.198959	0.323831	0.99672	-	-	-	-	-
Berkshire-specific A compartments	1	119200000	119220000	0.115048	-0.42279	0.537838	0.99384	-	-	-	-	-
Berkshire-specific A compartments	1	204500000	204520000	0.276506	-0.187158	0.463664	0.999519	-	-	-	-	-
Berkshire-specific A compartments	1	204520000	204540000	0.0863196	-0.158106	0.244425	0.994193	-	-	-	-	-
Berkshire-specific A compartments	1	204540000	204560000	0.220266	-0.246737	0.467003	0.994845	-	-	-	-	-
Berkshire-specific A compartments	1	216240000	216260000	0.163223	-0.337547	0.50077	0.99088	ENSSSCG00000005206	MLANA	0	0	-
Berkshire-specific A compartments	1	229600000	229620000	0.33491	-0.309541	0.644451	0.994403	-	-	-	-	-
Berkshire-specific A compartments	1	234060000	234080000	0.097096	-0.263975	0.361071	0.99657	-	-	-	-	-
Berkshire-specific A compartments	1	234780000	234800000	0.146014	-0.259493	0.405508	0.99206	-	-	-	-	-
Berkshire-specific A compartments	1	240120000	240140000	0.620434	-0.205871	0.826305	0.990296	-	-	-	-	-
Berkshire-specific A compartments	1	240420000	240440000	0.673041	-0.584771	1.25781	0.992417	-	-	-	-	-
Berkshire-specific A compartments	1	260460000	260480000	0.580853	-0.188095	0.768948	0.987466	-	-	-	-	-
Berkshire-specific A compartments	2	10580000	10600000	0.222954	-0.394998	0.617952	0.996696	ENSSSCG00000013098;ENSSSCG00000029938	Unknown;Unknown	0;0.01168349907025	0;0.01168349907025	-;-
Berkshire-specific A compartments	2	10920000	10940000	0.440407	-0.29477	0.735177	0.987993	-	-	-	-	-
Berkshire-specific A compartments	2	36800000	36820000	0.0306265	-0.238799	0.269426	0.99292	-	-	-	-	-
Berkshire-specific A compartments	2	72360000	72380000	0.249078	-0.219112	0.46819	0.994642	-	-	-	-	-
Berkshire-specific A compartments	2	72480000	72500000	0.206603	-0.131286	0.337889	0.998956	-	-	-	-	-
Berkshire-specific A compartments	2	81960000	81980000	0.663897	-0.336367	1.00026	0.99209	-	-	-	-	-
Berkshire-specific A compartments	2	81980000	82000000	0.493392	-0.29695	0.790342	0.993997	-	-	-	-	-
Berkshire-specific A compartments	2	87120000	87140000	0.259123	-0.28523	0.544353	0.990985	-	-	-	-	-
Berkshire-specific A compartments	2	113400000	113420000	0.137739	-0.230423	0.368163	0.991333	-	-	-	-	-
Berkshire-specific A compartments	2	116280000	116300000	0.358288	-0.343628	0.701916	0.993032	ENSSSCG00000014203	MCC	9.77372	9.40575	0.509593
Berkshire-specific A compartments	2	126900000	126920000	0.271918	-0.119801	0.391719	0.988297	-	-	-	-	-
Berkshire-specific A compartments	2	142420000	142440000	0.238111	-0.242987	0.481097	0.985862	-	-	-	-	-
Berkshire-specific A compartments	2	145520000	145540000	0.194646	-0.331099	0.525745	0.988217	-	-	-	-	-
Berkshire-specific A compartments	3	2500000	2520000	0.463156	-0.241047	0.704203	0.985332	-	-	-	-	-
Berkshire-specific A compartments	3	2920000	2940000	0.4476	-0.498354	0.945953	0.983059	-	-	-	-	-
Berkshire-specific A compartments	3	30660000	30680000	0.343549	-0.208744	0.552293	0.985922	-	-	-	-	-
Berkshire-specific A compartments	3	30700000	30720000	0.496004	-0.0602183	0.556223	0.993906	-	-	-	-	-
Berkshire-specific A compartments	3	49500000	49520000	0.130605	-0.294452	0.425058	0.983643	-	-	-	-	-
Berkshire-specific A compartments	3	70120000	70140000	0.688979	-0.288742	0.977721	0.996616	-	-	-	-	-
Berkshire-specific A compartments	3	70200000	70220000	0.500045	-0.429694	0.929739	0.99333	-	-	-	-	-
Berkshire-specific A compartments	3	70700000	70720000	0.370756	-0.273024	0.64378	0.991932	-	-	-	-	-
Berkshire-specific A compartments	3	73300000	73320000	0.652531	-0.52187	1.1744	0.988505	-	-	-	-	-
Berkshire-specific A compartments	3	92360000	92380000	0.242691	-0.19888	0.441571	0.996246	-	-	-	-	-
Berkshire-specific A compartments	3	93060000	93080000	0.29209	-0.473209	0.765298	0.992078	-	-	-	-	-
Berkshire-specific A compartments	3	96640000	96660000	0.711538	-0.160448	0.871986	0.994607	-	-	-	-	-
Berkshire-specific A compartments	3	127540000	127560000	0.302138	-0.280433	0.582571	0.986832	-	-	-	-	-
Berkshire-specific A compartments	3	131640000	131660000	0.290354	-0.326127	0.616481	0.989856	-	-	-	-	-
Berkshire-specific A compartments	3	132540000	132560000	0.832111	-0.49444	1.32655	0.996439	-	-	-	-	-
Berkshire-specific A compartments	3	132560000	132580000	0.582177	-0.111364	0.69354	0.994385	-	-	-	-	-
Berkshire-specific A compartments	3	132580000	132600000	0.487078	-0.262603	0.749681	0.989098	-	-	-	-	-
Berkshire-specific A compartments	4	9040000	9060000	0.231323	-0.165409	0.396732	0.990146	-	-	-	-	-
Berkshire-specific A compartments	4	17400000	17420000	0.579457	-0.333256	0.912713	0.982314	-	-	-	-	-
Berkshire-specific A compartments	4	17420000	17440000	0.308433	-0.420912	0.729345	0.989319	-	-	-	-	-
Berkshire-specific A compartments	4	17440000	17460000	0.221286	-0.461075	0.682361	0.990684	-	-	-	-	-
Berkshire-specific A compartments	4	17460000	17480000	0.196275	-0.441137	0.637412	0.988646	-	-	-	-	-
Berkshire-specific A compartments	4	17500000	17520000	0.152456	-0.220415	0.372871	0.985743	-	-	-	-	-
Berkshire-specific A compartments	4	17560000	17580000	0.125398	-0.111531	0.236929	0.986268	-	-	-	-	-
Berkshire-specific A compartments	4	17820000	17840000	0.22767	-0.219805	0.447475	0.996535	-	-	-	-	-
Berkshire-specific A compartments	4	19360000	19380000	0.0985784	-0.188378	0.286957	0.991766	-	-	-	-	-
Berkshire-specific A compartments	4	28020000	28040000	0.524543	-0.314072	0.838615	0.991891	-	-	-	-	-
Berkshire-specific A compartments	4	28180000	28200000	0.299073	-0.395859	0.694931	0.995592	-	-	-	-	-
Berkshire-specific A compartments	4	28220000	28240000	0.207949	-0.60419	0.812139	0.995409	-	-	-	-	-
Berkshire-specific A compartments	4	31600000	31620000	0.0775436	-0.231865	0.309408	0.991408	-	-	-	-	-
Berkshire-specific A compartments	4	31620000	31640000	0.169519	-0.225199	0.394718	0.99357	-	-	-	-	-
Berkshire-specific A compartments	4	38400000	38420000	0.431069	-0.216728	0.647797	0.994506	-	-	-	-	-
Berkshire-specific A compartments	4	62260000	62280000	0.169279	-0.116378	0.285657	0.995501	-	-	-	-	-
Berkshire-specific A compartments	4	68900000	68920000	0.0586494	-0.452253	0.510903	0.997076	-	-	-	-	-
Berkshire-specific A compartments	4	77160000	77180000	0.109832	-0.220235	0.330066	0.992562	-	-	-	-	-
Berkshire-specific A compartments	4	89460000	89480000	0.462492	-0.201676	0.664168	0.989793	-	-	-	-	-
Berkshire-specific A compartments	4	101440000	101460000	0.621101	-0.651196	1.2723	0.995014	-	-	-	-	-
Berkshire-specific A compartments	4	104620000	104640000	0.505765	-0.361656	0.867421	0.989275	ENSSSCG00000006742	MAB21L3	0.104451	0.104451	-
Berkshire-specific A compartments	4	106300000	106320000	0.615223	-0.130236	0.745459	0.992437	-	-	-	-	-
Berkshire-specific A compartments	4	108940000	108960000	0.393514	-0.379899	0.773413	0.990584	ENSSSCG00000006792	PGB	0	0	-
Berkshire-specific A compartments	4	125520000	125540000	0.39731	-0.84336	1.24067	0.991004	ENSSSCG00000006912	HFM1	4.81711	2.30884	0.675996
Berkshire-specific A compartments	5	13240000	13260000	0.37959	-0.17698	0.55657	0.994153	-	-	-	-	-
Berkshire-specific A compartments	5	34540000	34560000	0.323124	-0.130405	0.453528	0.998102	-	-	-	-	-
Berkshire-specific A compartments	5	77800000	77820000	0.349583	-0.208933	0.558516	0.986055	-	-	-	-	-
Berkshire-specific A compartments	5	101460000	101480000	0.900843	-0.569377	1.47022	0.982946	-	-	-	-	-
Berkshire-specific A compartments	6	0	20000	4.54912	-2.4566	7.00572	0.985666	-	-	-	-	-
Berkshire-specific A compartments	6	20000	40000	3.96663	-3.89375	7.86039	0.99577	-	-	-	-	-
Berkshire-specific A compartments	6	7300000	7320000	0.253917	-0.317243	0.571159	0.98095	-	-	-	-	-
Berkshire-specific A compartments	6	7720000	7740000	0.392126	-0.183143	0.575269	0.98764	-	-	-	-	-
Berkshire-specific A compartments	6	37780000	37800000	0.318001	-0.194475	0.512476	0.992102	-	-	-	-	-
Berkshire-specific A compartments	6	37940000	37960000	0.456579	-0.0709925	0.527572	0.996865	ENSSSCG00000024443;ENSSSCG00000026239	ORC6;VPS35	3.467216758977;48.2821407217494	0.385246306553;68.2659747467505	0.9;0.41426788007395
Berkshire-specific A compartments	6	37960000	37980000	0.125732	-0.201312	0.327044	0.993671	-	-	-	-	-
Berkshire-specific A compartments	6	41380000	41400000	0.19078	-0.202434	0.393213	0.99198	-	-	-	-	-
Berkshire-specific A compartments	6	61780000	61800000	0.463266	-0.184525	0.647792	0.999575	ENSSSCG00000042823	Unknown	-	-	-
Berkshire-specific A compartments	6	76460000	76480000	0.785504	-0.414976	1.20048	0.998713	-	-	-	-	-
Berkshire-specific A compartments	6	76520000	76540000	0.747935	-0.745942	1.49388	0.9916	-	-	-	-	-
Berkshire-specific A compartments	6	76540000	76560000	0.570097	-0.527635	1.09773	0.992053	-	-	-	-	-
Berkshire-specific A compartments	6	76620000	76640000	0.762132	-0.447684	1.20982	0.989892	-	-	-	-	-
Berkshire-specific A compartments	6	76640000	76660000	0.866115	-0.448671	1.31479	0.988076	ENSSSCG00000043698;ENSSSCG00000051351	Unknown;Unknown	0;-	0;-	-;-
Berkshire-specific A compartments	6	86880000	86900000	0.43107	-0.205389	0.636459	0.989897	-	-	-	-	-
Berkshire-specific A compartments	6	86980000	87000000	0.530748	-0.107396	0.638144	0.988968	-	-	-	-	-
Berkshire-specific A compartments	6	156120000	156140000	0.294694	-0.396839	0.691533	0.991172	-	-	-	-	-
Berkshire-specific A compartments	6	156180000	156200000	0.327194	-0.430212	0.757406	0.991017	-	-	-	-	-
Berkshire-specific A compartments	6	156220000	156240000	0.235493	-0.571865	0.807358	0.98944	-	-	-	-	-
Berkshire-specific A compartments	7	26720000	26740000	0.334586	-0.459727	0.794314	0.991341	-	-	-	-	-
Berkshire-specific A compartments	7	28480000	28500000	0.294243	-0.275466	0.56971	0.992081	-	-	-	-	-
Berkshire-specific A compartments	7	41340000	41360000	0.845249	-0.606672	1.45192	0.982606	-	-	-	-	-
Berkshire-specific A compartments	7	41460000	41480000	0.495418	-0.393309	0.888728	0.989995	ENSSSCG00000021218	TDRD6	0.0447436	0.0447436	-
Berkshire-specific A compartments	7	41480000	41500000	0.718551	-0.357495	1.07605	0.983723	-	-	-	-	-
Berkshire-specific A compartments	7	90340000	90360000	0.43666	-0.112613	0.549273	0.99711	ENSSSCG00000002285	GPHN	45.1068	42.6116	0.514223
Berkshire-specific A compartments	7	94440000	94460000	0.336012	-0.155692	0.491703	0.994719	ENSSSCG00000002330	PCNX1	23.4328	22.1293	0.514305
Berkshire-specific A compartments	8	11620000	11640000	0.275787	-0.227141	0.502928	0.982628	-	-	-	-	-
Berkshire-specific A compartments	8	81300000	81320000	0.348532	-0.230014	0.578546	0.996888	-	-	-	-	-
Berkshire-specific A compartments	8	104180000	104200000	0.216744	-0.242575	0.459319	0.997201	-	-	-	-	-
Berkshire-specific A compartments	8	104200000	104220000	0.102902	-0.300834	0.403736	0.998632	-	-	-	-	-
Berkshire-specific A compartments	8	114360000	114380000	0.379017	-0.139012	0.518029	0.989756	-	-	-	-	-
Berkshire-specific A compartments	8	115300000	115320000	0.18678	-0.843298	1.03008	0.994083	-	-	-	-	-
Berkshire-specific A compartments	8	119200000	119220000	0.0816627	-0.338744	0.420407	0.995226	-	-	-	-	-
Berkshire-specific A compartments	8	133180000	133200000	0.540842	-0.391422	0.932264	0.983005	-	-	-	-	-
Berkshire-specific A compartments	8	133200000	133220000	0.474976	-0.213383	0.68836	0.982511	-	-	-	-	-
Berkshire-specific A compartments	8	134100000	134120000	0.454395	-0.130848	0.585243	0.987789	-	-	-	-	-
Berkshire-specific A compartments	9	21060000	21080000	0.232224	-0.261444	0.493667	0.98804	-	-	-	-	-
Berkshire-specific A compartments	9	28000000	28020000	0.173556	-0.116024	0.289581	0.993267	-	-	-	-	-
Berkshire-specific A compartments	9	53700000	53720000	0.352269	-0.367082	0.719351	0.990075	-	-	-	-	-
Berkshire-specific A compartments	9	76340000	76360000	0.254354	-0.478418	0.732772	0.998776	ENSSSCG00000015336;ENSSSCG00000015337	SLC25A13;Unknown	13.6061726460898;856.31372013798	11.7551657356351;1159.81854439202	0.536492689829582;0.424730924256898
Berkshire-specific A compartments	9	90960000	90980000	0.094245	-0.0924059	0.186651	0.990738	-	-	-	-	-
Berkshire-specific A compartments	9	116900000	116920000	0.192903	-0.107918	0.300821	0.99344	-	-	-	-	-
Berkshire-specific A compartments	9	130000000	130020000	0.45343	-0.439656	0.893086	0.990926	-	-	-	-	-
Berkshire-specific A compartments	9	130020000	130040000	0.610145	-0.307155	0.9173	0.98746	-	-	-	-	-
Berkshire-specific A compartments	9	130040000	130060000	0.330817	-0.349719	0.680536	0.989323	-	-	-	-	-
Berkshire-specific A compartments	9	130060000	130080000	0.396314	-0.498587	0.894901	0.983739	-	-	-	-	-
Berkshire-specific A compartments	9	134380000	134400000	0.556414	-0.54299	1.0994	0.98649	-	-	-	-	-
Berkshire-specific A compartments	9	134400000	134420000	0.676866	-0.404159	1.08103	0.989596	-	-	-	-	-
Berkshire-specific A compartments	9	135220000	135240000	0.522027	-0.170663	0.69269	0.985517	-	-	-	-	-
Berkshire-specific A compartments	9	135240000	135260000	0.455866	-0.313575	0.769441	0.986006	-	-	-	-	-
Berkshire-specific A compartments	10	1220000	1240000	0.374773	-0.168493	0.543266	0.989311	-	-	-	-	-
Berkshire-specific A compartments	10	12000000	12020000	0.545332	-0.528501	1.07383	0.987437	-	-	-	-	-
Berkshire-specific A compartments	10	12040000	12060000	0.505062	-0.994192	1.49925	0.979152	-	-	-	-	-
Berkshire-specific A compartments	10	12100000	12120000	0.477793	-0.729847	1.20764	0.986638	-	-	-	-	-
Berkshire-specific A compartments	10	12160000	12180000	0.517616	-0.741785	1.2594	0.985714	-	-	-	-	-
Berkshire-specific A compartments	10	12200000	12220000	0.571274	-0.532599	1.10387	0.984597	-	-	-	-	-
Berkshire-specific A compartments	10	12260000	12280000	0.803436	-0.606982	1.41042	0.984476	-	-	-	-	-
Berkshire-specific A compartments	10	20520000	20540000	0.183336	-0.21265	0.395986	0.99539	-	-	-	-	-
Berkshire-specific A compartments	10	21820000	21840000	0.0905142	-0.421352	0.511866	0.990992	-	-	-	-	-
Berkshire-specific A compartments	10	40080000	40100000	0.179956	-0.354302	0.534257	0.982737	-	-	-	-	-
Berkshire-specific A compartments	10	43540000	43560000	0.232926	-0.253356	0.486282	0.984372	-	-	-	-	-
Berkshire-specific A compartments	10	44160000	44180000	0.151468	-0.161923	0.313391	0.984415	-	-	-	-	-
Berkshire-specific A compartments	10	48220000	48240000	0.292737	-0.0663267	0.359064	0.985175	-	-	-	-	-
Berkshire-specific A compartments	10	49040000	49060000	0.684255	-0.148614	0.832868	0.994846	-	-	-	-	-
Berkshire-specific A compartments	10	52460000	52480000	0.0761787	-0.463786	0.539964	0.991054	-	-	-	-	-
Berkshire-specific A compartments	11	47280000	47300000	0.473231	-0.16706	0.640291	0.98914	-	-	-	-	-
Berkshire-specific A compartments	12	11600000	11620000	0.183954	-0.222236	0.406189	0.987109	ENSSSCG00000017258	FAM20A	1.76876	3.13502	0.360693
Berkshire-specific A compartments	12	12300000	12320000	0.239937	-0.239182	0.479118	0.985679	-	-	-	-	-
Berkshire-specific A compartments	12	12800000	12820000	0.404404	-0.242981	0.647385	0.992169	ENSSSCG00000023992	CEP112	4.21258	3.11148	0.57517
Berkshire-specific A compartments	12	13100000	13120000	0.333168	-0.272972	0.606139	0.981126	-	-	-	-	-
Berkshire-specific A compartments	12	13120000	13140000	0.393428	-0.100294	0.493722	0.985825	-	-	-	-	-
Berkshire-specific A compartments	12	13140000	13160000	0.534665	-0.285558	0.820223	0.978715	-	-	-	-	-
Berkshire-specific A compartments	12	16260000	16280000	0.455962	-0.416406	0.872368	0.993876	-	-	-	-	-
Berkshire-specific A compartments	12	17220000	17240000	0.468677	-0.32121	0.789887	0.988326	-	-	-	-	-
Berkshire-specific A compartments	12	17260000	17280000	0.260569	-0.950367	1.21094	0.988184	-	-	-	-	-
Berkshire-specific A compartments	12	17420000	17440000	0.642923	-0.468448	1.11137	0.988558	-	-	-	-	-
Berkshire-specific A compartments	13	4480000	4500000	0.118575	-0.208786	0.327361	0.995558	-	-	-	-	-
Berkshire-specific A compartments	13	23680000	23700000	0.535985	-0.337591	0.873576	0.993148	ENSSSCG00000029419	SCN11A	0.0547797	0.0547797	-
Berkshire-specific A compartments	13	27120000	27140000	0.575324	-0.270476	0.845799	0.988101	-	-	-	-	-
Berkshire-specific A compartments	13	40380000	40400000	0.341957	-0.18814	0.530097	0.987411	-	-	-	-	-
Berkshire-specific A compartments	13	48900000	48920000	0.227005	-0.101191	0.328196	0.998338	-	-	-	-	-
Berkshire-specific A compartments	13	51440000	51460000	0.316431	-0.122791	0.439223	0.998208	ENSSSCG00000039120;ENSSSCG00000048680	Unknown;Unknown	-;-	-;-	-;-
Berkshire-specific A compartments	13	84040000	84060000	0.447844	-0.27525	0.723094	0.996678	-	-	-	-	-
Berkshire-specific A compartments	13	85320000	85340000	0.204436	-0.222988	0.427423	0.996167	-	-	-	-	-
Berkshire-specific A compartments	13	111040000	111060000	0.276378	-0.119848	0.396226	0.986201	-	-	-	-	-
Berkshire-specific A compartments	13	111100000	111120000	0.0759594	-0.138428	0.214387	0.999163	ENSSSCG00000020906	GHSR	18.0507	21.641	0.454773
Berkshire-specific A compartments	13	118740000	118760000	0.354311	-0.499391	0.853702	0.996315	-	-	-	-	-
Berkshire-specific A compartments	13	148100000	148120000	0.290742	-0.261807	0.552549	0.994235	-	-	-	-	-
Berkshire-specific A compartments	13	165720000	165740000	0.5574	-0.461017	1.01842	0.997239	-	-	-	-	-
Berkshire-specific A compartments	13	165740000	165760000	0.455925	-0.409583	0.865509	0.996202	-	-	-	-	-
Berkshire-specific A compartments	13	170560000	170580000	0.628704	-0.141932	0.770636	0.993935	-	-	-	-	-
Berkshire-specific A compartments	13	170620000	170640000	0.360748	-0.185668	0.546416	0.998263	-	-	-	-	-
Berkshire-specific A compartments	13	170640000	170660000	0.601359	-0.175795	0.777154	0.997963	-	-	-	-	-
Berkshire-specific A compartments	14	11160000	11180000	0.363476	-0.298347	0.661823	0.991644	-	-	-	-	-
Berkshire-specific A compartments	14	11200000	11220000	0.581645	-0.312852	0.894497	0.988311	ENSSSCG00000009665;ENSSSCG00000009666	CHRNA2;EPHX2	0.00522783960630387;20.3208286453054	0.00343543745557113;6.01384261351958	-;0.771637832330856
Berkshire-specific A compartments	14	11300000	11320000	0.0611829	-0.695257	0.75644	0.988098	ENSSSCG00000009667	Unknown	0.156897	0.251358	-
Berkshire-specific A compartments	14	11340000	11360000	0.267168	-0.414171	0.681338	0.984326	ENSSSCG00000009668	CLU	30.2881	39.1312	0.436307
Berkshire-specific A compartments	14	11360000	11380000	0.313966	-0.263381	0.577348	0.992939	ENSSSCG00000020846	SCARA3	7.88997	12.4022	0.388818
Berkshire-specific A compartments	14	11940000	11960000	0.41139	-0.330412	0.741803	0.993544	-	-	-	-	-
Berkshire-specific A compartments	14	87440000	87460000	0.333322	-0.607914	0.941235	0.997596	-	-	-	-	-
Berkshire-specific A compartments	14	87460000	87480000	0.626988	-0.27847	0.905458	0.998716	-	-	-	-	-
Berkshire-specific A compartments	14	100100000	100120000	0.264523	-0.311745	0.576268	0.995977	-	-	-	-	-
Berkshire-specific A compartments	14	101120000	101140000	0.203509	-0.128474	0.331983	0.993031	ENSSSCG00000010449	CH25H	0.892473	0.537621	0.624066
Berkshire-specific A compartments	14	111140000	111160000	0.29141	-0.465245	0.756655	0.995764	-	-	-	-	-
Berkshire-specific A compartments	14	132800000	132820000	0.723934	-0.382343	1.10628	0.987622	-	-	-	-	-
Berkshire-specific A compartments	14	132860000	132880000	0.591906	-0.353897	0.945803	0.990935	-	-	-	-	-
Berkshire-specific A compartments	14	136840000	136860000	0.827477	-0.150723	0.978201	0.983808	-	-	-	-	-
Berkshire-specific A compartments	14	136860000	136880000	0.814857	-0.0806973	0.895554	0.985804	-	-	-	-	-
Berkshire-specific A compartments	15	2140000	2160000	0.911524	-0.251305	1.16283	0.99189	-	-	-	-	-
Berkshire-specific A compartments	15	3220000	3240000	0.20922	-0.110285	0.319506	0.98557	-	-	-	-	-
Berkshire-specific A compartments	15	3640000	3660000	0.102387	-0.289287	0.391673	0.992293	-	-	-	-	-
Berkshire-specific A compartments	15	3680000	3700000	0.169799	-0.136116	0.305915	0.992009	-	-	-	-	-
Berkshire-specific A compartments	15	4320000	4340000	0.21333	-0.22854	0.44187	0.990132	-	-	-	-	-
Berkshire-specific A compartments	15	13360000	13380000	0.231177	-0.393727	0.624904	0.994886	-	-	-	-	-
Berkshire-specific A compartments	15	13380000	13400000	0.239411	-0.443724	0.683135	0.992904	-	-	-	-	-
Berkshire-specific A compartments	15	13480000	13500000	0.602406	-0.790688	1.39309	0.985355	-	-	-	-	-
Berkshire-specific A compartments	15	13500000	13520000	0.237288	-0.855134	1.09242	0.991551	-	-	-	-	-
Berkshire-specific A compartments	15	32700000	32720000	0.382109	-0.168822	0.550931	0.989253	-	-	-	-	-
Berkshire-specific A compartments	15	68780000	68800000	0.194792	-0.0995072	0.2943	0.997458	-	-	-	-	-
Berkshire-specific A compartments	15	68920000	68940000	0.0986875	-0.255349	0.354037	0.995668	-	-	-	-	-
Berkshire-specific A compartments	15	100340000	100360000	0.312217	-0.35389	0.666107	0.990592	-	-	-	-	-
Berkshire-specific A compartments	15	105220000	105240000	0.811251	-0.15749	0.968741	0.99654	-	-	-	-	-
Berkshire-specific A compartments	15	107860000	107880000	0.0767396	-0.362143	0.438882	0.987987	-	-	-	-	-
Berkshire-specific A compartments	15	107900000	107920000	0.143759	-0.398931	0.54269	0.993214	-	-	-	-	-
Berkshire-specific A compartments	15	109120000	109140000	0.422976	-0.176405	0.599382	0.99694	-	-	-	-	-
Berkshire-specific A compartments	15	118480000	118500000	0.123051	-0.441874	0.564925	0.98758	-	-	-	-	-
Berkshire-specific A compartments	15	128640000	128660000	0.255057	-0.420384	0.675441	0.981545	-	-	-	-	-
Berkshire-specific A compartments	15	134220000	134240000	0.817735	-0.372785	1.19052	0.985296	-	-	-	-	-
Berkshire-specific A compartments	15	134300000	134320000	0.607326	-0.162416	0.769742	0.985163	-	-	-	-	-
Berkshire-specific A compartments	15	134340000	134360000	0.745985	-0.222147	0.968132	0.983584	-	-	-	-	-
Berkshire-specific A compartments	15	134400000	134420000	0.623482	-0.215458	0.83894	0.992017	-	-	-	-	-
Berkshire-specific A compartments	15	134680000	134700000	0.46928	-0.310849	0.780129	0.985898	-	-	-	-	-
Berkshire-specific A compartments	15	134700000	134720000	0.445201	-0.37173	0.81693	0.979787	-	-	-	-	-
Berkshire-specific A compartments	15	134820000	134840000	0.517353	-0.688156	1.20551	0.985455	-	-	-	-	-
Berkshire-specific A compartments	15	134840000	134860000	0.386306	-0.463944	0.85025	0.985129	-	-	-	-	-
Berkshire-specific A compartments	15	134880000	134900000	0.615894	-0.452755	1.06865	0.986606	-	-	-	-	-
Berkshire-specific A compartments	16	1860000	1880000	0.00107568	-0.413143	0.414219	1	ENSSSCG00000050328	Unknown	0.0285177	0.0285177	-
Berkshire-specific A compartments	16	4940000	4960000	0.150577	-0.136399	0.286976	0.991628	-	-	-	-	-
Berkshire-specific A compartments	16	24460000	24480000	0.0742819	-0.321451	0.395733	0.992792	-	-	-	-	-
Berkshire-specific A compartments	16	27000000	27020000	0.273799	-0.215651	0.48945	0.999156	-	-	-	-	-
Berkshire-specific A compartments	16	32080000	32100000	0.34479	-0.501841	0.846631	0.993922	-	-	-	-	-
Berkshire-specific A compartments	16	32200000	32220000	0.0977827	-0.4357	0.533482	0.991777	ENSSSCG00000046034	Unknown	-	-	-
Berkshire-specific A compartments	16	32220000	32240000	0.137886	-0.375081	0.512967	0.981291	-	-	-	-	-
Berkshire-specific A compartments	16	36880000	36900000	0.321478	-0.344552	0.66603	0.996614	-	-	-	-	-
Berkshire-specific A compartments	16	39520000	39540000	0.158903	-0.167969	0.326872	0.995746	-	-	-	-	-
Berkshire-specific A compartments	16	48140000	48160000	0.404578	-0.0655268	0.470104	0.992705	-	-	-	-	-
Berkshire-specific A compartments	16	53160000	53180000	0.213842	-0.278968	0.492811	0.996048	ENSSSCG00000017000	RANBP17	7.57034	6.73541	0.529182
Berkshire-specific A compartments	16	63600000	63620000	0.158838	-0.0409312	0.199769	0.988093	ENSSSCG00000017041	ADRA1B	0.919474	1.56687	0.369809
Berkshire-specific A compartments	16	65100000	65120000	0.321949	-0.326636	0.648585	0.99629	-	-	-	-	-
Berkshire-specific A compartments	17	53180000	53200000	0.274458	-0.350241	0.624699	0.992879	-	-	-	-	-
Berkshire-specific A compartments	17	53200000	53220000	0.566191	-0.156447	0.722638	0.991144	-	-	-	-	-
Berkshire-specific A compartments	17	54800000	54820000	0.381764	-0.0580347	0.439799	0.984606	-	-	-	-	-
Berkshire-specific A compartments	17	54920000	54940000	0.260386	-0.102184	0.362569	0.988545	-	-	-	-	-
Berkshire-specific A compartments	18	29480000	29500000	0.256911	-0.200336	0.457248	0.996933	-	-	-	-	-
Berkshire-specific A compartments	18	51980000	52000000	0.702268	-0.0928675	0.795136	0.991271	-	-	-	-	-
Berkshire-specific A compartments	18	52000000	52020000	0.647542	-0.194064	0.841606	0.990819	-	-	-	-	-
Berkshire-specific A compartments	18	52740000	52760000	0.478536	-0.385239	0.863775	0.991345	-	-	-	-	-
Berkshire-specific A compartments	18	53720000	53740000	0.0804704	-0.558036	0.638506	0.993433	-	-	-	-	-
Berkshire-specific A compartments	18	53780000	53800000	0.167386	-0.500853	0.668239	0.989512	-	-	-	-	-
Berkshire-specific A compartments	18	53840000	53860000	0.388299	-0.231116	0.619415	0.991704	-	-	-	-	-
Berkshire-specific A compartments	18	53900000	53920000	0.233552	-0.334674	0.568226	0.99259	-	-	-	-	-
Berkshire-specific A compartments	18	54100000	54120000	0.343132	-0.570314	0.913445	0.993899	-	-	-	-	-
Berkshire-specific A compartments	18	54120000	54140000	0.208052	-0.354514	0.562566	0.998339	-	-	-	-	-
More active compartments in Berkshire	1	9560000	9580000	4.27322	3.76791	0.505301	0.990105	-	-	-	-	-
More active compartments in Berkshire	1	9620000	9640000	4.72684	4.11122	0.61562	0.991465	ENSSSCG00000038527	Unknown	0.568157	0.386783	0.594966
More active compartments in Berkshire	1	26960000	26980000	1.14642	0.572832	0.573591	0.985432	-	-	-	-	-
More active compartments in Berkshire	1	28620000	28640000	1.72937	1.19648	0.532886	0.995128	-	-	-	-	-
More active compartments in Berkshire	1	35740000	35760000	1.12397	0.593333	0.530641	0.994413	-	-	-	-	-
More active compartments in Berkshire	1	66780000	66800000	-0.869371	-1.38158	0.512207	0.994772	-	-	-	-	-
More active compartments in Berkshire	1	92640000	92660000	-2.91763	-3.59439	0.67676	0.997876	-	-	-	-	-
More active compartments in Berkshire	1	92660000	92680000	-2.81427	-3.35595	0.541677	0.998038	-	-	-	-	-
More active compartments in Berkshire	1	119240000	119260000	-0.363347	-0.863737	0.50039	0.997451	-	-	-	-	-
More active compartments in Berkshire	1	132020000	132040000	2.3455	1.78264	0.562863	0.99655	-	-	-	-	-
More active compartments in Berkshire	1	177000000	177020000	-3.14137	-3.64368	0.502311	0.998844	-	-	-	-	-
More active compartments in Berkshire	1	177060000	177080000	-3.147	-3.75278	0.605781	0.997371	-	-	-	-	-
More active compartments in Berkshire	1	177160000	177180000	-2.62828	-3.19243	0.564149	0.994582	-	-	-	-	-
More active compartments in Berkshire	1	177200000	177220000	-2.42565	-2.99141	0.565767	0.996927	-	-	-	-	-
More active compartments in Berkshire	1	177220000	177240000	-2.1291	-2.64786	0.518759	0.990821	-	-	-	-	-
More active compartments in Berkshire	1	177260000	177280000	-1.62581	-2.16049	0.534675	0.989339	-	-	-	-	-
More active compartments in Berkshire	1	177340000	177360000	-1.90926	-2.53557	0.626307	0.997439	-	-	-	-	-
More active compartments in Berkshire	1	177360000	177380000	-1.95812	-2.5513	0.593176	0.997502	-	-	-	-	-
More active compartments in Berkshire	1	177400000	177420000	-1.96765	-2.4845	0.516843	0.995729	-	-	-	-	-
More active compartments in Berkshire	1	177480000	177500000	-2.45588	-3.00559	0.549715	0.996426	-	-	-	-	-
More active compartments in Berkshire	1	177500000	177520000	-2.73014	-3.23093	0.50079	0.995491	-	-	-	-	-
More active compartments in Berkshire	1	177520000	177540000	-2.81023	-3.40747	0.597242	0.996314	-	-	-	-	-
More active compartments in Berkshire	1	177720000	177740000	-3.16493	-3.68849	0.523559	0.987863	-	-	-	-	-
More active compartments in Berkshire	1	177920000	177940000	-3.16261	-3.67696	0.51436	0.99795	-	-	-	-	-
More active compartments in Berkshire	1	177980000	178000000	-2.9684	-3.48213	0.51373	0.996664	-	-	-	-	-
More active compartments in Berkshire	1	178020000	178040000	-3.04822	-3.5913	0.543078	0.994081	-	-	-	-	-
More active compartments in Berkshire	1	237100000	237120000	3.69551	3.1842	0.51131	0.991622	-	-	-	-	-
More active compartments in Berkshire	1	238960000	238980000	1.73634	1.1305	0.60584	0.998316	-	-	-	-	-
More active compartments in Berkshire	1	242880000	242900000	-1.17965	-2.2112	1.03156	0.986885	-	-	-	-	-
More active compartments in Berkshire	1	242900000	242920000	-1.35601	-2.247	0.890993	0.982889	-	-	-	-	-
More active compartments in Berkshire	1	242960000	242980000	-1.17779	-2.18326	1.00548	0.994387	-	-	-	-	-
More active compartments in Berkshire	1	243000000	243020000	-2.36899	-3.25307	0.884075	0.989538	-	-	-	-	-
More active compartments in Berkshire	1	260340000	260360000	-0.983866	-1.60424	0.620376	0.990442	-	-	-	-	-
More active compartments in Berkshire	1	263680000	263700000	-4.93678	-5.56094	0.624155	0.981326	ENSSSCG00000044533	Unknown	0	0	-
More active compartments in Berkshire	1	266540000	266560000	3.53589	2.98884	0.547053	0.996012	-	-	-	-	-
More active compartments in Berkshire	1	266600000	266620000	3.66866	2.98528	0.683383	0.993726	-	-	-	-	-
More active compartments in Berkshire	1	269700000	269720000	5.56749	4.9111	0.656385	0.987977	-	-	-	-	-
More active compartments in Berkshire	2	2160000	2180000	4.84859	4.34227	0.506324	0.996188	ENSSSCG00000012857	CARS1	35.6218	31.9419	0.527233
More active compartments in Berkshire	2	9800000	9820000	6.71504	6.1827	0.532343	0.99258	-	-	-	-	-
More active compartments in Berkshire	2	9960000	9980000	6.03646	5.52235	0.514109	0.989433	-	-	-	-	-
More active compartments in Berkshire	2	10000000	10020000	5.7568	5.24405	0.512752	0.988726	ENSSSCG00000013088	LRRC10B	1.07545	0.737319	0.593265
More active compartments in Berkshire	2	10500000	10520000	-1.06846	-2.0287	0.960245	0.993035	ENSSSCG00000027430	Unknown	0	0	-
More active compartments in Berkshire	2	12000000	12020000	-4.96223	-5.50266	0.540431	0.994173	ENSSSCG00000013132	OR5A2	0	0	-
More active compartments in Berkshire	2	15200000	15220000	7.23895	6.68451	0.554445	0.99494	ENSSSCG00000013238	SLC39A13	20.5853	15.8181	0.565478
More active compartments in Berkshire	2	18320000	18340000	3.55803	3.05033	0.507698	0.98751	-	-	-	-	-
More active compartments in Berkshire	2	37300000	37320000	-0.752015	-1.50405	0.75203	0.994479	-	-	-	-	-
More active compartments in Berkshire	2	37320000	37340000	-0.927406	-1.84627	0.918862	0.993166	-	-	-	-	-
More active compartments in Berkshire	2	37340000	37360000	-0.708271	-1.72412	1.01585	0.987791	-	-	-	-	-
More active compartments in Berkshire	2	37360000	37380000	-1.52235	-2.48674	0.964397	0.984284	-	-	-	-	-
More active compartments in Berkshire	2	37380000	37400000	-1.84313	-2.72312	0.879985	0.986901	ENSSSCG00000048514	Unknown	-	-	-
More active compartments in Berkshire	2	37400000	37420000	-2.03216	-2.84269	0.81053	0.989746	-	-	-	-	-
More active compartments in Berkshire	2	37420000	37440000	-2.16002	-2.97836	0.818345	0.982794	-	-	-	-	-
More active compartments in Berkshire	2	37440000	37460000	-2.67621	-3.60682	0.930613	0.988803	ENSSSCG00000044581	Unknown	0.0385503	0.0385503	-
More active compartments in Berkshire	2	37460000	37480000	-2.82416	-3.76344	0.939273	0.981363	-	-	-	-	-
More active compartments in Berkshire	2	37480000	37500000	-3.03404	-3.83906	0.805018	0.98481	-	-	-	-	-
More active compartments in Berkshire	2	37500000	37520000	-3.01093	-4.05681	1.04587	0.987595	-	-	-	-	-
More active compartments in Berkshire	2	37520000	37540000	-3.12557	-4.09317	0.967594	0.988141	-	-	-	-	-
More active compartments in Berkshire	2	37540000	37560000	-3.42089	-4.20334	0.782448	0.984918	-	-	-	-	-
More active compartments in Berkshire	2	37560000	37580000	-3.6259	-4.26469	0.638794	0.984363	-	-	-	-	-
More active compartments in Berkshire	2	37600000	37620000	-3.45672	-4.01231	0.555594	0.990647	-	-	-	-	-
More active compartments in Berkshire	2	37640000	37660000	-3.45512	-4.23947	0.784351	0.985972	-	-	-	-	-
More active compartments in Berkshire	2	37660000	37680000	-3.53656	-4.33073	0.794169	0.984018	-	-	-	-	-
More active compartments in Berkshire	2	37700000	37720000	-3.61029	-4.2062	0.595918	0.993216	-	-	-	-	-
More active compartments in Berkshire	2	37720000	37740000	-3.45972	-4.0642	0.604474	0.988446	-	-	-	-	-
More active compartments in Berkshire	2	37740000	37760000	-3.51525	-4.27069	0.755442	0.990716	-	-	-	-	-
More active compartments in Berkshire	2	37760000	37780000	-3.63073	-4.16286	0.532124	0.991666	-	-	-	-	-
More active compartments in Berkshire	2	37780000	37800000	-3.62072	-4.40724	0.786519	0.990445	-	-	-	-	-
More active compartments in Berkshire	2	37840000	37860000	-3.73578	-4.35051	0.61473	0.985394	-	-	-	-	-
More active compartments in Berkshire	2	37960000	37980000	-3.89227	-4.48048	0.588211	0.997199	-	-	-	-	-
More active compartments in Berkshire	2	38000000	38020000	-4.25239	-4.80793	0.555547	0.993253	-	-	-	-	-
More active compartments in Berkshire	2	38200000	38220000	-4.40326	-5.06546	0.662195	0.986273	-	-	-	-	-
More active compartments in Berkshire	2	38380000	38400000	-4.56235	-5.11796	0.555611	0.985775	-	-	-	-	-
More active compartments in Berkshire	2	39820000	39840000	1.93184	1.35477	0.577074	0.987743	-	-	-	-	-
More active compartments in Berkshire	2	54440000	54460000	-5.02055	-5.86098	0.840436	0.961483	-	-	-	-	-
More active compartments in Berkshire	2	54460000	54480000	-4.90607	-5.70218	0.796104	0.949394	ENSSSCG00000033545	OR2T35	0	0	-
More active compartments in Berkshire	2	56180000	56200000	-4.76876	-5.9351	1.16633	0.993568	-	-	-	-	-
More active compartments in Berkshire	2	56260000	56280000	-4.8879	-5.46598	0.578074	0.996345	-	-	-	-	-
More active compartments in Berkshire	2	57420000	57440000	-4.60613	-5.15506	0.548933	0.99617	-	-	-	-	-
More active compartments in Berkshire	2	57460000	57480000	-4.63323	-5.14497	0.511744	0.993918	ENSSSCG00000035236	OR2V2	0	0	-
More active compartments in Berkshire	2	60520000	60540000	6.1269	5.60443	0.522475	0.99762	-	-	-	-	-
More active compartments in Berkshire	2	60720000	60740000	5.23904	4.67616	0.56288	0.996287	-	-	-	-	-
More active compartments in Berkshire	2	60740000	60760000	5.55516	4.97554	0.579621	0.996477	ENSSSCG00000013868	F2RL3	0.0309736	0.0309736	-
More active compartments in Berkshire	2	60900000	60920000	5.37629	4.87194	0.504355	0.991914	-	-	-	-	-
More active compartments in Berkshire	2	63760000	63780000	-5.56791	-6.33836	0.770449	0.999056	-	-	-	-	-
More active compartments in Berkshire	2	71960000	71980000	-2.79754	-4.01447	1.21693	0.999475	ENSSSCG00000013559	MBD3L3	0.018265	0.018265	-
More active compartments in Berkshire	2	71980000	72000000	-2.78195	-3.35219	0.570242	0.998975	ENSSSCG00000041386	Unknown	0	0	-
More active compartments in Berkshire	2	72080000	72100000	-4.44286	-5.01613	0.573273	0.999375	-	-	-	-	-
More active compartments in Berkshire	2	72100000	72120000	-4.50256	-5.22063	0.71807	0.995484	ENSSSCG00000026402	Unknown	-	-	-
More active compartments in Berkshire	2	109280000	109300000	-4.71127	-5.22523	0.513957	0.997461	-	-	-	-	-
More active compartments in Berkshire	2	109800000	109820000	-4.53525	-5.04584	0.510594	0.998282	-	-	-	-	-
More active compartments in Berkshire	2	136480000	136500000	5.48528	4.93108	0.554197	0.993423	-	-	-	-	-
More active compartments in Berkshire	2	151220000	151240000	8.26936	7.70683	0.56253	0.99196	ENSSSCG00000014447	SLC6A7	0.0387266	0.0387266	-
More active compartments in Berkshire	3	440000	460000	4.73806	4.20256	0.535497	0.992638	-	-	-	-	-
More active compartments in Berkshire	3	560000	580000	4.92242	4.40521	0.517207	0.988451	-	-	-	-	-
More active compartments in Berkshire	3	6240000	6260000	3.84514	3.22243	0.622704	0.979399	-	-	-	-	-
More active compartments in Berkshire	3	6260000	6280000	4.11862	3.50561	0.613002	0.972747	-	-	-	-	-
More active compartments in Berkshire	3	21640000	21660000	-2.93965	-3.97337	1.03372	1	-	-	-	-	-
More active compartments in Berkshire	3	24240000	24260000	-2.41754	-3.27922	0.861684	0.987601	-	-	-	-	-
More active compartments in Berkshire	3	24280000	24300000	-3.94035	-4.48368	0.543332	0.992978	-	-	-	-	-
More active compartments in Berkshire	3	30280000	30300000	-3.03686	-3.57027	0.533412	0.993055	-	-	-	-	-
More active compartments in Berkshire	3	30300000	30320000	-2.48316	-3.312	0.828845	0.992802	-	-	-	-	-
More active compartments in Berkshire	3	30540000	30560000	-1.31719	-1.82392	0.506734	0.985903	-	-	-	-	-
More active compartments in Berkshire	3	30580000	30600000	-0.576363	-1.09481	0.518444	0.98719	-	-	-	-	-
More active compartments in Berkshire	3	42140000	42160000	3.3773	2.81749	0.55981	0.997259	ENSSSCG00000008073	OMD	12.7979	14.7089	0.465263
More active compartments in Berkshire	3	42180000	42200000	3.22944	2.72484	0.504597	0.9975	ENSSSCG00000008072	ASPN	196.052	234.656	0.455186
More active compartments in Berkshire	3	42220000	42240000	3.00905	2.49566	0.513384	0.99745	-	-	-	-	-
More active compartments in Berkshire	3	57360000	57380000	1.5905	1.08381	0.506684	0.99363	-	-	-	-	-
More active compartments in Berkshire	3	69620000	69640000	1.36473	0.811965	0.552769	0.981604	-	-	-	-	-
More active compartments in Berkshire	3	69640000	69660000	1.66568	1.08631	0.579372	0.996444	ENSSSCG00000022162	RAB11FIP5	4.50326	3.89314	0.536333
More active compartments in Berkshire	3	69700000	69720000	2.50057	1.63553	0.865044	0.984347	ENSSSCG00000008307	SFXN5	2.14624	1.72122	0.554948
More active compartments in Berkshire	3	73060000	73080000	1.72614	1.10266	0.623477	0.993511	-	-	-	-	-
More active compartments in Berkshire	3	94940000	94960000	1.92725	1.42484	0.50241	0.994386	-	-	-	-	-
More active compartments in Berkshire	3	95020000	95040000	1.18649	0.593998	0.59249	0.997396	-	-	-	-	-
More active compartments in Berkshire	3	95120000	95140000	1.74535	1.19808	0.547269	0.998282	-	-	-	-	-
More active compartments in Berkshire	3	95140000	95160000	1.84735	1.29928	0.548067	0.995079	-	-	-	-	-
More active compartments in Berkshire	3	95160000	95180000	1.83699	1.15151	0.685483	0.988862	-	-	-	-	-
More active compartments in Berkshire	3	95260000	95280000	2.13107	1.57285	0.558226	0.99419	-	-	-	-	-
More active compartments in Berkshire	3	95300000	95320000	1.91281	1.31098	0.601825	0.992558	-	-	-	-	-
More active compartments in Berkshire	3	95340000	95360000	1.35462	0.848181	0.506441	0.98993	-	-	-	-	-
More active compartments in Berkshire	3	95400000	95420000	1.26393	0.709398	0.554536	0.992905	-	-	-	-	-
More active compartments in Berkshire	3	96180000	96200000	1.33352	0.756031	0.577486	0.99118	-	-	-	-	-
More active compartments in Berkshire	3	104880000	104900000	-5.12834	-5.65434	0.525999	0.99419	-	-	-	-	-
More active compartments in Berkshire	3	128480000	128500000	-2.65058	-3.32681	0.676233	0.985187	-	-	-	-	-
More active compartments in Berkshire	3	128500000	128520000	-2.83678	-3.43579	0.59901	0.989366	-	-	-	-	-
More active compartments in Berkshire	3	128600000	128620000	-3.08315	-3.73362	0.650469	0.995777	-	-	-	-	-
More active compartments in Berkshire	3	129040000	129060000	-3.96713	-4.50415	0.537015	0.99025	-	-	-	-	-
More active compartments in Berkshire	3	131240000	131260000	2.95791	2.26627	0.691644	0.975223	ENSSSCG00000025629	COLEC11	0.0501928	0.0501928	-
More active compartments in Berkshire	3	132280000	132300000	4.27069	3.56142	0.709268	0.993994	-	-	-	-	-
More active compartments in Berkshire	4	100000	120000	5.27279	4.76931	0.503473	0.998226	ENSSSCG00000034031	ZNF16	12.5051	12.8486	0.493226
More active compartments in Berkshire	4	780000	800000	4.71897	3.96878	0.750189	0.998569	-	-	-	-	-
More active compartments in Berkshire	4	6180000	6200000	-1.74578	-2.25824	0.512467	0.985376	-	-	-	-	-
More active compartments in Berkshire	4	17140000	17160000	-1.66769	-2.19101	0.523322	0.996551	-	-	-	-	-
More active compartments in Berkshire	4	17160000	17180000	-1.69822	-2.24808	0.549857	0.992311	-	-	-	-	-
More active compartments in Berkshire	4	17180000	17200000	-1.39296	-1.97766	0.5847	0.991042	-	-	-	-	-
More active compartments in Berkshire	4	17260000	17280000	-1.09642	-1.78175	0.685335	0.989843	-	-	-	-	-
More active compartments in Berkshire	4	17280000	17300000	-1.17486	-1.83262	0.657759	0.985379	-	-	-	-	-
More active compartments in Berkshire	4	17300000	17320000	-1.14678	-1.69998	0.5532	0.987032	-	-	-	-	-
More active compartments in Berkshire	4	17320000	17340000	-0.946553	-1.52531	0.578759	0.992794	-	-	-	-	-
More active compartments in Berkshire	4	17340000	17360000	-0.799092	-1.36779	0.568695	0.996215	-	-	-	-	-
More active compartments in Berkshire	4	17360000	17380000	-0.513975	-1.10931	0.595333	0.993434	-	-	-	-	-
More active compartments in Berkshire	4	27120000	27140000	-2.4887	-3.01056	0.521867	0.999619	-	-	-	-	-
More active compartments in Berkshire	4	47040000	47060000	-0.94559	-1.46999	0.524402	0.995361	-	-	-	-	-
More active compartments in Berkshire	4	70560000	70580000	-4.39306	-4.91472	0.521663	0.99357	-	-	-	-	-
More active compartments in Berkshire	4	70780000	70800000	-3.68461	-4.35661	0.672001	0.993453	-	-	-	-	-
More active compartments in Berkshire	4	70800000	70820000	-3.21992	-3.83726	0.617335	0.991154	-	-	-	-	-
More active compartments in Berkshire	4	70820000	70840000	-2.75471	-3.39311	0.638399	0.992753	-	-	-	-	-
More active compartments in Berkshire	4	79240000	79260000	1.59886	0.979746	0.619118	0.994193	-	-	-	-	-
More active compartments in Berkshire	4	79260000	79280000	2.82527	2.27038	0.554888	0.996564	ENSSSCG00000039568	SNAI2	7.17496	15.2282	0.320265
More active compartments in Berkshire	4	79940000	79960000	4.38616	3.75689	0.62927	0.998047	-	-	-	-	-
More active compartments in Berkshire	4	97060000	97080000	-2.60604	-3.15719	0.551159	0.997369	-	-	-	-	-
More active compartments in Berkshire	4	100680000	100700000	2.90104	2.35702	0.544015	0.99577	-	-	-	-	-
More active compartments in Berkshire	4	100880000	100900000	2.80413	2.2848	0.519338	0.995187	ENSSSCG00000020964	SEC22B	95.4499	85.953	0.526176
More active compartments in Berkshire	4	101500000	101520000	1.67417	1.0034	0.670773	0.991304	-	-	-	-	-
More active compartments in Berkshire	4	108760000	108780000	3.64962	3.00685	0.642768	0.989363	-	-	-	-	-
More active compartments in Berkshire	4	108820000	108840000	3.13173	2.526	0.60573	0.992592	-	-	-	-	-
More active compartments in Berkshire	4	108880000	108900000	2.79024	2.26618	0.52406	0.987558	ENSSSCG00000025485	C1orf162	0.0821476	0.0821476	-
More active compartments in Berkshire	4	108900000	108920000	2.52013	1.93704	0.583084	0.988868	ENSSSCG00000006790;ENSSSCG00000006791;ENSSSCG00000037772	WDR77;OVGP1;ATP5PB	13.390250958335;0.0155847006204419;1146.31786817454	12.72125223924;0.0111932910247581;948.644706825464	0.512810421407626;-;0.547178208266817
More active compartments in Berkshire	4	118720000	118740000	-2.32402	-2.83239	0.508366	0.986356	-	-	-	-	-
More active compartments in Berkshire	5	540000	560000	6.1404	5.61327	0.52713	0.992988	-	-	-	-	-
More active compartments in Berkshire	5	13300000	13320000	1.60221	1.00398	0.598223	0.996189	-	-	-	-	-
More active compartments in Berkshire	5	39940000	39960000	-3.52557	-4.41072	0.88515	0.999613	-	-	-	-	-
More active compartments in Berkshire	5	48840000	48860000	-2.02291	-2.55762	0.534714	0.990304	-	-	-	-	-
More active compartments in Berkshire	5	51780000	51800000	-1.42299	-1.92886	0.505868	0.99316	-	-	-	-	-
More active compartments in Berkshire	5	51820000	51840000	-1.21951	-1.81847	0.598963	0.989584	-	-	-	-	-
More active compartments in Berkshire	5	51840000	51860000	-1.74581	-2.2466	0.50079	0.994606	-	-	-	-	-
More active compartments in Berkshire	5	51860000	51880000	-1.97821	-2.53755	0.559343	0.993182	ENSSSCG00000000577	GYS2	0.130706	0.130706	-
More active compartments in Berkshire	5	74540000	74560000	-0.77955	-1.3086	0.52905	0.983577	-	-	-	-	-
More active compartments in Berkshire	5	76980000	77000000	2.34143	1.80364	0.537792	0.992381	ENSSSCG00000034097	Unknown	0	0	-
More active compartments in Berkshire	5	80860000	80880000	-1.91685	-2.59208	0.675234	0.988005	-	-	-	-	-
More active compartments in Berkshire	5	80880000	80900000	-2.93748	-3.59902	0.661533	0.988693	-	-	-	-	-
More active compartments in Berkshire	5	94920000	94940000	-3.24141	-3.74569	0.504283	0.99237	-	-	-	-	-
More active compartments in Berkshire	5	101160000	101180000	-2.84084	-3.55216	0.711325	0.98942	-	-	-	-	-
More active compartments in Berkshire	5	101180000	101200000	-2.22888	-3.0305	0.801618	0.990684	-	-	-	-	-
More active compartments in Berkshire	5	101280000	101300000	-0.58497	-1.3564	0.771434	0.984486	-	-	-	-	-
More active compartments in Berkshire	5	101300000	101320000	-1.56723	-2.42856	0.861326	0.991442	-	-	-	-	-
More active compartments in Berkshire	5	101320000	101340000	-1.63895	-2.31834	0.679389	0.99172	-	-	-	-	-
More active compartments in Berkshire	5	101380000	101400000	-1.19932	-2.2605	1.06118	0.990255	-	-	-	-	-
More active compartments in Berkshire	5	101500000	101520000	3.0683	1.94243	1.12587	0.98246	-	-	-	-	-
More active compartments in Berkshire	6	4400000	4420000	5.26263	4.56575	0.696872	0.98723	ENSSSCG00000030446	KCNG4	0.0934917	0.0934917	-
More active compartments in Berkshire	6	39480000	39500000	-0.869759	-1.41718	0.547419	0.994808	-	-	-	-	-
More active compartments in Berkshire	6	39620000	39640000	-0.977948	-1.63014	0.652196	0.983864	ENSSSCG00000051598	Unknown	-	-	-
More active compartments in Berkshire	6	41800000	41820000	-2.1252	-2.68112	0.555918	0.986905	-	-	-	-	-
More active compartments in Berkshire	6	96300000	96320000	2.37627	1.83549	0.540786	0.987182	-	-	-	-	-
More active compartments in Berkshire	6	111860000	111880000	-2.85885	-3.36292	0.50407	0.992076	-	-	-	-	-
More active compartments in Berkshire	6	154460000	154480000	-5.43588	-5.95014	0.514267	0.983007	-	-	-	-	-
More active compartments in Berkshire	6	167640000	167660000	6.26296	5.4135	0.849459	0.987205	ENSSSCG00000026449	KDM4A	15.2862	15.4789	0.496868
More active compartments in Berkshire	7	5120000	5140000	1.1749	0.610905	0.563999	0.986012	-	-	-	-	-
More active compartments in Berkshire	7	5320000	5340000	0.87594	0.365807	0.510133	0.98644	-	-	-	-	-
More active compartments in Berkshire	7	8820000	8840000	-2.34554	-2.87925	0.533704	0.985703	-	-	-	-	-
More active compartments in Berkshire	7	8880000	8900000	-2.4061	-2.98666	0.580564	0.989976	-	-	-	-	-
More active compartments in Berkshire	7	15180000	15200000	-1.96566	-2.60931	0.643645	0.985417	-	-	-	-	-
More active compartments in Berkshire	7	22760000	22780000	2.05628	1.29237	0.763913	0.992724	-	-	-	-	-
More active compartments in Berkshire	7	24220000	24240000	4.91926	4.15749	0.761772	0.997599	ENSSSCG00000001437;ENSSSCG00000001438;ENSSSCG00000001439	AGER;PBX2;GPSM3	1.540587158631;14.2521991448523;1.503967260141	1.82646743124233;13.1463720694811;0.167107473349	0.457547425356403;0.520180378508071;0.9
More active compartments in Berkshire	7	24240000	24260000	2.58046	2.06432	0.516147	0.996279	ENSSSCG00000001440	NOTCH4	10.5884	8.2564	0.561875
More active compartments in Berkshire	7	44900000	44920000	-6.38576	-6.94486	0.559108	0.994533	-	-	-	-	-
More active compartments in Berkshire	7	45280000	45300000	-5.56899	-6.12885	0.55986	0.994929	-	-	-	-	-
More active compartments in Berkshire	7	45300000	45320000	-5.1997	-6.37196	1.17226	0.996154	-	-	-	-	-
More active compartments in Berkshire	7	45320000	45340000	-5.38024	-6.11404	0.733801	0.989959	-	-	-	-	-
More active compartments in Berkshire	7	45340000	45360000	-5.27702	-6.05028	0.773264	0.989822	-	-	-	-	-
More active compartments in Berkshire	7	45400000	45420000	-5.04757	-5.79355	0.745974	0.986372	-	-	-	-	-
More active compartments in Berkshire	7	45480000	45500000	-4.29721	-5.35803	1.06082	0.992586	-	-	-	-	-
More active compartments in Berkshire	7	45500000	45520000	-4.16531	-5.39295	1.22765	0.988051	-	-	-	-	-
More active compartments in Berkshire	7	45620000	45640000	-5.10047	-5.70851	0.608033	0.990851	-	-	-	-	-
More active compartments in Berkshire	7	45640000	45660000	-5.04433	-5.66413	0.619799	0.99274	-	-	-	-	-
More active compartments in Berkshire	7	45660000	45680000	-4.90551	-5.53088	0.625373	0.989736	-	-	-	-	-
More active compartments in Berkshire	7	94020000	94040000	-1.95919	-2.52518	0.56599	0.99985	ENSSSCG00000002321	Unknown	0	0	-
More active compartments in Berkshire	7	94060000	94080000	-2.23306	-2.7582	0.525137	0.999319	ENSSSCG00000002322	ADAM21	0.021088	0.021088	-
More active compartments in Berkshire	7	99000000	99020000	3.07715	2.43721	0.63994	0.995318	-	-	-	-	-
More active compartments in Berkshire	7	99040000	99060000	3.06186	2.4696	0.592258	0.996142	-	-	-	-	-
More active compartments in Berkshire	7	99300000	99320000	2.97222	2.35472	0.617499	0.9891	-	-	-	-	-
More active compartments in Berkshire	7	99340000	99360000	3.02849	2.51481	0.513679	0.995899	-	-	-	-	-
More active compartments in Berkshire	7	99400000	99420000	1.64981	1.10561	0.544202	0.991228	-	-	-	-	-
More active compartments in Berkshire	7	99540000	99560000	2.41372	1.75271	0.66101	0.986902	-	-	-	-	-
More active compartments in Berkshire	7	99560000	99580000	2.33863	1.70057	0.638062	0.987472	-	-	-	-	-
More active compartments in Berkshire	7	99580000	99600000	2.43971	1.59467	0.845045	0.988967	-	-	-	-	-
More active compartments in Berkshire	7	99600000	99620000	2.32191	1.82096	0.500948	0.987561	-	-	-	-	-
More active compartments in Berkshire	7	99640000	99660000	2.94058	2.35831	0.582272	0.983457	-	-	-	-	-
More active compartments in Berkshire	7	99740000	99760000	2.211	1.59228	0.618718	0.986725	-	-	-	-	-
More active compartments in Berkshire	7	99800000	99820000	2.12354	1.50345	0.620096	0.992928	-	-	-	-	-
More active compartments in Berkshire	7	100440000	100460000	3.16251	2.60542	0.557089	0.997045	ENSSSCG00000002400;ENSSSCG00000036028	SAMD15;TMED8	0.0580958594183;5.52571250496981	0.0580958594183;4.00388045330269	-;0.579847694352257
More active compartments in Berkshire	7	100880000	100900000	-3.03437	-3.61733	0.582961	0.991879	-	-	-	-	-
More active compartments in Berkshire	7	113120000	113140000	3.35985	2.63679	0.723061	0.9959	-	-	-	-	-
More active compartments in Berkshire	7	113140000	113160000	2.60212	1.94812	0.654006	0.9918	ENSSSCG00000002441	PPP4R3A	32.9763	33.0586	0.499376
More active compartments in Berkshire	7	115040000	115060000	-0.901749	-1.65821	0.756466	0.983376	-	-	-	-	-
More active compartments in Berkshire	8	240000	260000	3.56041	2.91199	0.648423	0.99617	-	-	-	-	-
More active compartments in Berkshire	8	21360000	21380000	-1.404	-1.93707	0.533068	0.986444	-	-	-	-	-
More active compartments in Berkshire	8	66220000	66240000	-3.62357	-4.29093	0.66736	0.997176	ENSSSCG00000034735;ENSSSCG00000047476	Unknown;Unknown	-;0	-;0	-;-
More active compartments in Berkshire	8	66240000	66260000	-3.95703	-5.13985	1.18282	0.9999	-	-	-	-	-
More active compartments in Berkshire	8	73860000	73880000	1.48669	0.979478	0.507215	0.995252	-	-	-	-	-
More active compartments in Berkshire	8	114280000	114300000	1.9827	1.39419	0.58851	0.987267	-	-	-	-	-
More active compartments in Berkshire	8	115280000	115300000	-0.473773	-0.976571	0.502798	0.996554	-	-	-	-	-
More active compartments in Berkshire	8	116600000	116620000	2.70821	2.0861	0.622109	0.991167	-	-	-	-	-
More active compartments in Berkshire	8	119820000	119840000	1.5211	0.912816	0.608281	0.988829	-	-	-	-	-
More active compartments in Berkshire	8	124220000	124240000	-0.790138	-1.34693	0.556789	0.988026	-	-	-	-	-
More active compartments in Berkshire	8	124260000	124280000	-0.621805	-1.17712	0.55531	0.994256	-	-	-	-	-
More active compartments in Berkshire	8	124340000	124360000	-1.03056	-1.55546	0.5249	0.987332	-	-	-	-	-
More active compartments in Berkshire	8	124400000	124420000	-0.933018	-1.43963	0.506612	0.988409	-	-	-	-	-
More active compartments in Berkshire	8	124420000	124440000	-0.864996	-1.39845	0.533456	0.985976	-	-	-	-	-
More active compartments in Berkshire	8	124440000	124460000	-0.84499	-1.37607	0.531083	0.990455	-	-	-	-	-
More active compartments in Berkshire	8	126000000	126020000	-1.63295	-2.38488	0.751929	0.986608	-	-	-	-	-
More active compartments in Berkshire	8	126020000	126040000	-1.23447	-2.05978	0.825308	0.987381	-	-	-	-	-
More active compartments in Berkshire	8	126080000	126100000	-1.41852	-2.41536	0.996841	0.9879	-	-	-	-	-
More active compartments in Berkshire	8	126100000	126120000	-1.66997	-2.38611	0.716146	0.980263	-	-	-	-	-
More active compartments in Berkshire	8	126540000	126560000	-2.30429	-2.81661	0.512319	0.989039	-	-	-	-	-
More active compartments in Berkshire	8	131300000	131320000	3.81943	3.2762	0.543227	0.99314	-	-	-	-	-
More active compartments in Berkshire	8	131320000	131340000	3.99108	3.24532	0.745766	0.986177	-	-	-	-	-
More active compartments in Berkshire	8	131340000	131360000	4.30916	3.79727	0.511892	0.984789	-	-	-	-	-
More active compartments in Berkshire	8	131360000	131380000	4.70429	3.88242	0.821865	0.990534	-	-	-	-	-
More active compartments in Berkshire	8	131540000	131560000	3.85485	3.20068	0.65417	0.984315	-	-	-	-	-
More active compartments in Berkshire	8	131560000	131580000	3.73221	3.17114	0.561063	0.987253	-	-	-	-	-
More active compartments in Berkshire	8	132080000	132100000	1.88343	1.20819	0.675244	0.990627	-	-	-	-	-
More active compartments in Berkshire	8	132160000	132180000	1.72696	1.03275	0.694208	0.977002	-	-	-	-	-
More active compartments in Berkshire	8	132320000	132340000	1.9168	1.29877	0.618028	0.987791	-	-	-	-	-
More active compartments in Berkshire	8	133680000	133700000	4.23097	3.57657	0.654409	0.988322	-	-	-	-	-
More active compartments in Berkshire	8	133800000	133820000	4.00463	3.11526	0.889368	0.988199	-	-	-	-	-
More active compartments in Berkshire	8	134540000	134560000	-2.09241	-2.62256	0.530152	0.984377	-	-	-	-	-
More active compartments in Berkshire	8	135600000	135620000	3.7523	3.21115	0.541153	0.985328	-	-	-	-	-
More active compartments in Berkshire	8	135700000	135720000	3.58663	2.93017	0.65646	0.982026	-	-	-	-	-
More active compartments in Berkshire	8	136620000	136640000	2.75215	2.21845	0.533699	0.985744	-	-	-	-	-
More active compartments in Berkshire	8	136700000	136720000	1.39321	0.627975	0.765234	0.987175	-	-	-	-	-
More active compartments in Berkshire	8	137520000	137540000	0.812303	0.28545	0.526853	0.989816	-	-	-	-	-
More active compartments in Berkshire	8	138720000	138740000	4.15292	3.55664	0.596275	0.995923	-	-	-	-	-
More active compartments in Berkshire	9	4040000	4060000	-4.75972	-5.34265	0.582933	0.998413	ENSSSCG00000042309;ENSSSCG00000050387	Unknown;Unknown	0;0	0;0	-;-
More active compartments in Berkshire	9	4500000	4520000	-4.15027	-5.19301	1.04274	0.999088	-	-	-	-	-
More active compartments in Berkshire	9	4680000	4700000	-3.57528	-4.35039	0.775104	0.998719	-	-	-	-	-
More active compartments in Berkshire	9	19360000	19380000	-2.22273	-2.81205	0.589318	0.992401	-	-	-	-	-
More active compartments in Berkshire	9	22980000	23000000	-2.48981	-3.14852	0.658709	0.990489	-	-	-	-	-
More active compartments in Berkshire	9	30220000	30240000	-2.62601	-3.17539	0.549383	0.997189	-	-	-	-	-
More active compartments in Berkshire	9	32140000	32160000	-3.84095	-4.34742	0.506472	0.994023	-	-	-	-	-
More active compartments in Berkshire	9	50720000	50740000	-3.11201	-3.81254	0.700538	0.995492	ENSSSCG00000015151	TMEM225	0.0444726	0.0444726	-
More active compartments in Berkshire	9	50740000	50760000	-3.49976	-4.0932	0.593438	0.996542	ENSSSCG00000015152	OR4D5	0	0	-
More active compartments in Berkshire	9	53600000	53620000	2.09461	1.58623	0.508377	0.994445	-	-	-	-	-
More active compartments in Berkshire	9	53620000	53640000	1.79356	1.12993	0.66363	0.989749	-	-	-	-	-
More active compartments in Berkshire	9	53640000	53660000	1.50524	0.974096	0.531146	0.992787	-	-	-	-	-
More active compartments in Berkshire	9	59860000	59880000	-3.26026	-3.83469	0.57443	0.992793	-	-	-	-	-
More active compartments in Berkshire	9	60060000	60080000	-3.15229	-3.70575	0.553467	0.994358	-	-	-	-	-
More active compartments in Berkshire	9	60120000	60140000	-2.31212	-2.9475	0.635383	0.993357	-	-	-	-	-
More active compartments in Berkshire	9	60140000	60160000	-2.29811	-2.87285	0.574743	0.99368	ENSSSCG00000037534	OPCML	1.92005	1.62233	0.542023
More active compartments in Berkshire	9	60160000	60180000	-2.28821	-2.91571	0.627498	0.994756	-	-	-	-	-
More active compartments in Berkshire	9	60180000	60200000	-2.18124	-2.92146	0.740229	0.995281	-	-	-	-	-
More active compartments in Berkshire	9	60240000	60260000	-2.2	-2.73846	0.538466	0.998138	-	-	-	-	-
More active compartments in Berkshire	9	60320000	60340000	-1.51283	-2.20873	0.695902	0.994523	-	-	-	-	-
More active compartments in Berkshire	9	60360000	60380000	-1.55718	-2.13411	0.576928	0.996089	-	-	-	-	-
More active compartments in Berkshire	9	61940000	61960000	-5.14387	-5.69311	0.54924	0.998226	-	-	-	-	-
More active compartments in Berkshire	9	62920000	62940000	-4.7224	-5.4225	0.7001	0.997993	-	-	-	-	-
More active compartments in Berkshire	9	63740000	63760000	-1.68578	-2.21518	0.529396	0.998319	ENSSSCG00000022759;ENSSSCG00000023472	Unknown;FMO3	0.041390824129;0.149769076756154	0.041390824129;0.066564034113846	-;-
More active compartments in Berkshire	9	67800000	67820000	-1.26259	-1.86709	0.6045	0.991768	-	-	-	-	-
More active compartments in Berkshire	9	70400000	70420000	-1.78068	-2.32075	0.54007	0.994974	-	-	-	-	-
More active compartments in Berkshire	9	90680000	90700000	1.03227	0.449039	0.583227	0.99266	-	-	-	-	-
More active compartments in Berkshire	9	90800000	90820000	2.4274	1.92375	0.503644	0.994601	ENSSSCG00000015380	CDCA7L	22.6172	29.477	0.43416
More active compartments in Berkshire	9	91160000	91180000	-0.73456	-1.29432	0.55976	0.989756	-	-	-	-	-
More active compartments in Berkshire	9	95220000	95240000	-1.38333	-1.89324	0.509907	0.992833	-	-	-	-	-
More active compartments in Berkshire	9	108720000	108740000	-1.50847	-2.20139	0.692922	0.997437	-	-	-	-	-
More active compartments in Berkshire	9	108740000	108760000	-2.10179	-2.73446	0.632666	0.990476	-	-	-	-	-
More active compartments in Berkshire	9	108760000	108780000	-2.44982	-3.01198	0.562157	0.99655	-	-	-	-	-
More active compartments in Berkshire	9	108880000	108900000	-3.52485	-4.14922	0.624373	0.991706	-	-	-	-	-
More active compartments in Berkshire	9	108980000	109000000	-3.57092	-4.14735	0.576428	0.985501	-	-	-	-	-
More active compartments in Berkshire	9	109000000	109020000	-3.62775	-4.30931	0.681556	0.984151	-	-	-	-	-
More active compartments in Berkshire	9	109020000	109040000	-3.51459	-4.09447	0.579887	0.987613	-	-	-	-	-
More active compartments in Berkshire	9	109040000	109060000	-3.51712	-4.08615	0.569027	0.98629	-	-	-	-	-
More active compartments in Berkshire	9	109060000	109080000	-3.13414	-3.80022	0.666088	0.993921	-	-	-	-	-
More active compartments in Berkshire	9	109080000	109100000	-2.80987	-3.52666	0.716796	0.991843	-	-	-	-	-
More active compartments in Berkshire	9	109100000	109120000	-2.34023	-3.08709	0.746857	0.993126	-	-	-	-	-
More active compartments in Berkshire	9	109120000	109140000	-1.84285	-2.50918	0.666328	0.992188	-	-	-	-	-
More active compartments in Berkshire	9	109140000	109160000	-1.05226	-1.75129	0.69903	0.983129	-	-	-	-	-
More active compartments in Berkshire	9	111880000	111900000	-3.93041	-4.43432	0.50391	0.986	-	-	-	-	-
More active compartments in Berkshire	9	112020000	112040000	-4.04282	-4.54729	0.504465	0.988332	-	-	-	-	-
More active compartments in Berkshire	9	112220000	112240000	-3.51784	-4.02224	0.504398	0.994548	-	-	-	-	-
More active compartments in Berkshire	9	128680000	128700000	-3.35635	-3.86957	0.513216	0.988276	-	-	-	-	-
More active compartments in Berkshire	9	131980000	132000000	-0.712042	-1.3465	0.63446	0.975204	-	-	-	-	-
More active compartments in Berkshire	9	132000000	132020000	-1.21516	-1.89487	0.679706	0.983083	-	-	-	-	-
More active compartments in Berkshire	9	132020000	132040000	-1.73544	-2.43404	0.698598	0.981027	-	-	-	-	-
More active compartments in Berkshire	9	132040000	132060000	-1.94501	-2.72272	0.777705	0.98331	-	-	-	-	-
More active compartments in Berkshire	9	132080000	132100000	-2.28608	-3.01336	0.727281	0.984496	-	-	-	-	-
More active compartments in Berkshire	9	132120000	132140000	-2.18309	-2.92817	0.745081	0.976633	-	-	-	-	-
More active compartments in Berkshire	9	132140000	132160000	-2.48125	-3.05536	0.574108	0.978655	-	-	-	-	-
More active compartments in Berkshire	9	132220000	132240000	-1.74718	-2.36324	0.616057	0.978061	-	-	-	-	-
More active compartments in Berkshire	9	132260000	132280000	-1.52984	-2.0302	0.500359	0.981355	-	-	-	-	-
More active compartments in Berkshire	9	132300000	132320000	-1.17764	-1.8517	0.674062	0.984318	-	-	-	-	-
More active compartments in Berkshire	9	132320000	132340000	-1.15441	-1.81045	0.656041	0.986353	-	-	-	-	-
More active compartments in Berkshire	9	132360000	132380000	-0.683102	-1.4606	0.777502	0.987613	-	-	-	-	-
More active compartments in Berkshire	9	132400000	132420000	-0.589066	-1.29949	0.710428	0.982504	-	-	-	-	-
More active compartments in Berkshire	9	134960000	134980000	5.19725	4.62938	0.567879	0.994482	-	-	-	-	-
More active compartments in Berkshire	9	135040000	135060000	4.01772	3.33979	0.677934	0.993326	-	-	-	-	-
More active compartments in Berkshire	9	135080000	135100000	4.49185	3.85836	0.633484	0.985571	-	-	-	-	-
More active compartments in Berkshire	9	135100000	135120000	3.36354	2.59532	0.768223	0.978977	-	-	-	-	-
More active compartments in Berkshire	9	135120000	135140000	2.58816	2.02735	0.560807	0.9803	-	-	-	-	-
More active compartments in Berkshire	9	135140000	135160000	2.15367	1.29257	0.861108	0.979391	-	-	-	-	-
More active compartments in Berkshire	9	135180000	135200000	1.38128	0.605997	0.775287	0.987315	-	-	-	-	-
More active compartments in Berkshire	9	136140000	136160000	-2.28177	-2.80834	0.526566	0.990727	-	-	-	-	-
More active compartments in Berkshire	9	137580000	137600000	-1.68887	-2.80634	1.11747	0.984561	-	-	-	-	-
More active compartments in Berkshire	10	2760000	2780000	-3.82391	-4.35099	0.527076	0.982322	-	-	-	-	-
More active compartments in Berkshire	10	2840000	2860000	-3.63911	-4.2235	0.584395	0.984228	-	-	-	-	-
More active compartments in Berkshire	10	2880000	2900000	-3.47702	-4.06462	0.587601	0.987559	-	-	-	-	-
More active compartments in Berkshire	10	9460000	9480000	2.33718	1.83597	0.501211	0.982575	-	-	-	-	-
More active compartments in Berkshire	10	9780000	9800000	4.38218	3.87683	0.505355	0.983863	-	-	-	-	-
More active compartments in Berkshire	10	11900000	11920000	1.53882	0.979535	0.559285	0.989438	-	-	-	-	-
More active compartments in Berkshire	10	12340000	12360000	1.45289	0.947085	0.505804	0.986618	-	-	-	-	-
More active compartments in Berkshire	10	12700000	12720000	3.37001	2.81571	0.554306	0.986503	-	-	-	-	-
More active compartments in Berkshire	10	12740000	12760000	3.36079	2.66465	0.696137	0.990845	ENSSSCG00000010849	WDR26	39.1362	37.2366	0.512436
More active compartments in Berkshire	10	15240000	15260000	2.87501	1.8984	0.976608	0.995323	-	-	-	-	-
More active compartments in Berkshire	10	24760000	24780000	4.67961	4.08891	0.590705	0.994623	-	-	-	-	-
More active compartments in Berkshire	10	24800000	24820000	5.00109	4.47968	0.52141	0.9943	ENSSSCG00000038360	Unknown	-	-	-
More active compartments in Berkshire	10	25040000	25060000	-8.06534	-11.8146	3.74926	0.9994	-	-	-	-	-
More active compartments in Berkshire	10	25060000	25080000	-11.1737	-13.0101	1.83637	0.999813	ENSSSCG00000032993	FAM240B	-	-	-
More active compartments in Berkshire	10	43620000	43640000	-2.4206	-2.93053	0.509927	0.984765	-	-	-	-	-
More active compartments in Berkshire	10	43860000	43880000	-1.17877	-1.72086	0.542088	0.984404	-	-	-	-	-
More active compartments in Berkshire	10	44120000	44140000	1.05629	0.43147	0.624815	0.984324	-	-	-	-	-
More active compartments in Berkshire	10	64980000	65000000	4.36207	3.73753	0.624534	0.981954	-	-	-	-	-
More active compartments in Berkshire	11	55360000	55380000	-3.06094	-3.60547	0.544539	0.986864	-	-	-	-	-
More active compartments in Berkshire	11	67920000	67940000	5.18581	4.60079	0.585028	0.98493	-	-	-	-	-
More active compartments in Berkshire	11	67940000	67960000	5.19557	4.67958	0.51599	0.988526	-	-	-	-	-
More active compartments in Berkshire	11	71360000	71380000	-0.679638	-1.20137	0.521736	0.989127	-	-	-	-	-
More active compartments in Berkshire	12	2220000	2240000	4.54644	4.0448	0.501639	0.992541	-	-	-	-	-
More active compartments in Berkshire	12	2300000	2320000	4.49268	3.98904	0.503634	0.992756	-	-	-	-	-
More active compartments in Berkshire	12	2860000	2880000	2.36265	1.75608	0.606568	0.997445	-	-	-	-	-
More active compartments in Berkshire	12	12620000	12640000	-0.305571	-0.856377	0.550806	0.992339	-	-	-	-	-
More active compartments in Berkshire	12	13420000	13440000	1.87818	1.28259	0.59559	0.978203	-	-	-	-	-
More active compartments in Berkshire	12	13680000	13700000	2.35559	1.82831	0.527279	0.982814	-	-	-	-	-
More active compartments in Berkshire	12	13700000	13720000	2.52654	1.99558	0.530965	0.992831	-	-	-	-	-
More active compartments in Berkshire	12	15460000	15480000	2.11774	1.55825	0.559495	0.99278	-	-	-	-	-
More active compartments in Berkshire	12	15720000	15740000	1.54402	1.02055	0.523478	0.993492	-	-	-	-	-
More active compartments in Berkshire	12	16200000	16220000	1.35859	0.723484	0.635102	0.99637	-	-	-	-	-
More active compartments in Berkshire	12	16420000	16440000	-2.26164	-2.82168	0.560037	0.982462	-	-	-	-	-
More active compartments in Berkshire	12	16440000	16460000	-2.3035	-2.9601	0.656599	0.986951	-	-	-	-	-
More active compartments in Berkshire	12	16500000	16520000	-2.17319	-2.86878	0.695591	0.993345	-	-	-	-	-
More active compartments in Berkshire	12	17440000	17460000	1.43462	0.781244	0.653378	0.992417	ENSSSCG00000017316;ENSSSCG00000031893	NSF;ARL17A	14.1796702612256;32.9145908662225	17.1385352392243;47.1531672868525	0.452761262487466;0.411084206994978
More active compartments in Berkshire	12	21260000	21280000	-2.85647	-3.63608	0.779602	0.989133	ENSSSCG00000041928;ENSSSCG00000047892	KRTAP17-1;KRTAP16-1	0;0.0098100131222875	0;0.0098100131222875	-;-
More active compartments in Berkshire	12	26420000	26440000	3.80514	3.23093	0.574211	0.98684	-	-	-	-	-
More active compartments in Berkshire	12	46300000	46320000	2.85576	2.29069	0.565071	0.992387	ENSSSCG00000017797	SLC6A4	1.77271	0.959481	0.648824
More active compartments in Berkshire	12	46340000	46360000	3.11435	2.53693	0.577416	0.9923	-	-	-	-	-
More active compartments in Berkshire	12	46420000	46440000	3.02566	2.40776	0.617898	0.992924	-	-	-	-	-
More active compartments in Berkshire	12	46660000	46680000	3.17516	2.59461	0.580548	0.992972	-	-	-	-	-
More active compartments in Berkshire	12	57480000	57500000	-4.44873	-5.01967	0.570933	0.985341	-	-	-	-	-
More active compartments in Berkshire	12	57600000	57620000	-4.33938	-5.19609	0.85671	0.97205	-	-	-	-	-
More active compartments in Berkshire	12	58560000	58580000	-3.96851	-5.48983	1.52132	0.997482	-	-	-	-	-
More active compartments in Berkshire	13	12720000	12740000	1.66174	0.99642	0.66532	0.988621	-	-	-	-	-
More active compartments in Berkshire	13	18300000	18320000	3.11271	2.55063	0.562077	0.988013	-	-	-	-	-
More active compartments in Berkshire	13	23760000	23780000	3.2205	2.62701	0.593492	0.991956	-	-	-	-	-
More active compartments in Berkshire	13	23940000	23960000	1.78687	1.06299	0.723887	0.986296	ENSSSCG00000024024	CX3CR1	3.02922	3.40923	0.470489
More active compartments in Berkshire	13	26820000	26840000	2.35819	1.8527	0.505485	0.994862	-	-	-	-	-
More active compartments in Berkshire	13	40280000	40300000	1.90214	1.36032	0.541829	0.99363	-	-	-	-	-
More active compartments in Berkshire	13	40320000	40340000	1.27168	0.685621	0.586063	0.992484	-	-	-	-	-
More active compartments in Berkshire	13	48220000	48240000	2.42407	1.89055	0.533523	0.994732	-	-	-	-	-
More active compartments in Berkshire	13	150020000	150040000	-2.6755	-3.26738	0.591883	0.99365	-	-	-	-	-
More active compartments in Berkshire	13	150080000	150100000	-2.3946	-3.04953	0.654933	0.995924	-	-	-	-	-
More active compartments in Berkshire	13	150100000	150120000	-2.05024	-2.75692	0.706687	0.989861	-	-	-	-	-
More active compartments in Berkshire	13	150120000	150140000	-2.29437	-2.87604	0.581664	0.994157	-	-	-	-	-
More active compartments in Berkshire	13	150140000	150160000	-2.22164	-2.98506	0.763424	0.995146	-	-	-	-	-
More active compartments in Berkshire	13	150180000	150200000	-2.53976	-3.11382	0.574064	0.994074	ENSSSCG00000031524	DPPA2	-	-	-
More active compartments in Berkshire	13	150200000	150220000	-2.5459	-3.16304	0.617144	0.991861	-	-	-	-	-
More active compartments in Berkshire	13	150220000	150240000	-2.53714	-3.05598	0.518838	0.990886	-	-	-	-	-
More active compartments in Berkshire	13	150240000	150260000	-2.65752	-3.19352	0.535999	0.989318	-	-	-	-	-
More active compartments in Berkshire	13	165780000	165800000	1.71897	0.920262	0.798705	0.989992	-	-	-	-	-
More active compartments in Berkshire	13	167040000	167060000	-1.37167	-1.9933	0.621631	0.992729	-	-	-	-	-
More active compartments in Berkshire	13	195680000	195700000	2.21824	1.65255	0.565687	0.972917	-	-	-	-	-
More active compartments in Berkshire	13	195820000	195840000	1.21301	0.687441	0.525566	0.993581	-	-	-	-	-
More active compartments in Berkshire	13	196040000	196060000	4.79304	4.22294	0.570108	0.981546	ENSSSCG00000032024	URB1	7.69811	6.68571	0.535192
More active compartments in Berkshire	13	196080000	196100000	3.5258	2.94415	0.581643	0.979254	-	-	-	-	-
More active compartments in Berkshire	13	196120000	196140000	3.13025	2.46499	0.665264	0.978954	-	-	-	-	-
More active compartments in Berkshire	13	196140000	196160000	3.45631	2.79727	0.659044	0.975538	-	-	-	-	-
More active compartments in Berkshire	13	196780000	196800000	5.28339	4.74061	0.542786	0.9871	-	-	-	-	-
More active compartments in Berkshire	13	207440000	207460000	6.80421	6.25754	0.546668	0.992611	-	-	-	-	-
More active compartments in Berkshire	14	5940000	5960000	-4.75944	-5.44206	0.682622	0.99915	-	-	-	-	-
More active compartments in Berkshire	14	5960000	5980000	-4.52908	-5.37393	0.844858	0.997582	-	-	-	-	-
More active compartments in Berkshire	14	14120000	14140000	-2.24367	-2.99524	0.751571	0.991881	-	-	-	-	-
More active compartments in Berkshire	14	14140000	14160000	-2.31453	-2.90594	0.591412	0.992797	-	-	-	-	-
More active compartments in Berkshire	14	14300000	14320000	-2.78935	-3.59714	0.807792	0.998582	-	-	-	-	-
More active compartments in Berkshire	14	21380000	21400000	-4.92	-5.4718	0.551797	0.991378	-	-	-	-	-
More active compartments in Berkshire	14	22380000	22400000	-2.13295	-2.63546	0.502508	0.996951	-	-	-	-	-
More active compartments in Berkshire	14	53820000	53840000	-5.5606	-6.14374	0.583133	0.996649	-	-	-	-	-
More active compartments in Berkshire	14	53840000	53860000	-5.71461	-6.3992	0.684592	0.995455	-	-	-	-	-
More active compartments in Berkshire	14	53880000	53900000	-5.91963	-6.46219	0.542561	0.997061	-	-	-	-	-
More active compartments in Berkshire	14	53900000	53920000	-5.69453	-6.27682	0.582284	0.996192	-	-	-	-	-
More active compartments in Berkshire	14	61040000	61060000	1.89913	1.33023	0.568908	0.995446	ENSSSCG00000037204	ZNF248	24.144	14.3961	0.626465
More active compartments in Berkshire	14	87200000	87220000	-3.85249	-4.52056	0.668075	0.993164	-	-	-	-	-
More active compartments in Berkshire	14	87240000	87260000	-3.76412	-4.5303	0.766182	0.992691	-	-	-	-	-
More active compartments in Berkshire	14	87320000	87340000	-2.52808	-3.85649	1.32842	0.998625	-	-	-	-	-
More active compartments in Berkshire	14	87340000	87360000	-1.93828	-4.26435	2.32606	0.99732	-	-	-	-	-
More active compartments in Berkshire	14	87360000	87380000	-2.81427	-5.21507	2.40081	0.998344	-	-	-	-	-
More active compartments in Berkshire	14	87380000	87400000	-2.25336	-4.9176	2.66424	0.997235	-	-	-	-	-
More active compartments in Berkshire	14	87400000	87420000	-2.40178	-5.25256	2.85078	0.998557	-	-	-	-	-
More active compartments in Berkshire	14	87420000	87440000	-1.78869	-4.37888	2.59019	0.998095	-	-	-	-	-
More active compartments in Berkshire	14	106060000	106080000	-5.90879	-6.7855	0.876717	0.995788	ENSSSCG00000032095	Unknown	0	0	-
More active compartments in Berkshire	14	112220000	112240000	5.11425	4.51162	0.60263	0.986286	-	-	-	-	-
More active compartments in Berkshire	14	124060000	124080000	1.34651	0.800234	0.546272	0.984711	ENSSSCG00000034754	PLEKHS1	-	-	-
More active compartments in Berkshire	14	124100000	124120000	1.2338	0.675361	0.558442	0.991055	-	-	-	-	-
More active compartments in Berkshire	14	124120000	124140000	1.73791	1.12505	0.612864	0.991246	-	-	-	-	-
More active compartments in Berkshire	14	124140000	124160000	1.9837	1.38743	0.59627	0.991038	-	-	-	-	-
More active compartments in Berkshire	14	124160000	124180000	2.00358	1.49042	0.513156	0.99381	ENSSSCG00000010644;ENSSSCG00000010645	DCLRE1A;NHLRC2	5.31432815723052;20.7260569151258	4.28547089893198;19.4902161379992	0.553587437209848;0.51536493418341
More active compartments in Berkshire	14	129080000	129100000	4.53974	3.91271	0.627031	0.987781	ENSSSCG00000010682	PRDX3	151.825	172.355	0.468336
More active compartments in Berkshire	14	132580000	132600000	3.32631	2.76882	0.557487	0.985535	-	-	-	-	-
More active compartments in Berkshire	14	133460000	133480000	3.27154	2.64791	0.623623	0.984495	-	-	-	-	-
More active compartments in Berkshire	14	133500000	133520000	3.35959	2.84246	0.517125	0.988149	-	-	-	-	-
More active compartments in Berkshire	14	135860000	135880000	1.82229	1.25981	0.562484	0.982614	-	-	-	-	-
More active compartments in Berkshire	14	139540000	139560000	-0.758871	-1.5344	0.775531	0.987272	-	-	-	-	-
More active compartments in Berkshire	14	139560000	139580000	-0.98168	-1.50942	0.527743	0.987431	-	-	-	-	-
More active compartments in Berkshire	14	139660000	139680000	-0.848271	-1.5146	0.666333	0.991367	-	-	-	-	-
More active compartments in Berkshire	14	140800000	140820000	5.1623	4.57472	0.587582	0.989434	-	-	-	-	-
More active compartments in Berkshire	14	141360000	141380000	3.21756	2.70982	0.507745	0.992288	ENSSSCG00000029088;ENSSSCG00000040586	MTG1;AL360181.3	41.4938204037375;6.45292098743077	58.6569273190126;5.87664431230173	0.414313635666564;0.523369707735825
More active compartments in Berkshire	15	44660000	44680000	3.45211	2.92135	0.53076	0.990391	-	-	-	-	-
More active compartments in Berkshire	15	44800000	44820000	3.81954	3.30838	0.511162	0.986249	ENSSSCG00000022456;ENSSSCG00000027901	CLDN24;CLDN22	0;0.07918921574075	0;0.07918921574075	-;-
More active compartments in Berkshire	15	57820000	57840000	-3.7547	-4.25774	0.503035	0.985523	-	-	-	-	-
More active compartments in Berkshire	15	60520000	60540000	-1.67345	-2.48408	0.810629	0.999462	-	-	-	-	-
More active compartments in Berkshire	15	60540000	60560000	-2.10878	-2.79619	0.687413	0.99895	-	-	-	-	-
More active compartments in Berkshire	15	60560000	60580000	-2.08222	-2.98696	0.904742	0.998444	-	-	-	-	-
More active compartments in Berkshire	15	60580000	60600000	-2.37564	-3.21928	0.84364	0.997551	-	-	-	-	-
More active compartments in Berkshire	15	60600000	60620000	-2.61283	-3.58422	0.971394	0.995436	-	-	-	-	-
More active compartments in Berkshire	15	60620000	60640000	-2.59843	-3.65813	1.0597	0.996104	-	-	-	-	-
More active compartments in Berkshire	15	60640000	60660000	-2.48601	-3.58097	1.09496	0.994379	-	-	-	-	-
More active compartments in Berkshire	15	60680000	60700000	-2.18354	-3.49939	1.31585	0.996722	-	-	-	-	-
More active compartments in Berkshire	15	60700000	60720000	-2.44095	-3.7369	1.29595	0.995834	-	-	-	-	-
More active compartments in Berkshire	15	60720000	60740000	-2.24718	-3.62489	1.37771	0.995706	-	-	-	-	-
More active compartments in Berkshire	15	60740000	60760000	-2.41533	-3.67576	1.26043	0.995492	-	-	-	-	-
More active compartments in Berkshire	15	60760000	60780000	-2.26836	-3.65632	1.38796	0.991622	-	-	-	-	-
More active compartments in Berkshire	15	60780000	60800000	-2.03625	-3.62259	1.58634	0.995221	-	-	-	-	-
More active compartments in Berkshire	15	60800000	60820000	-2.31758	-3.75244	1.43486	0.993754	-	-	-	-	-
More active compartments in Berkshire	15	60820000	60840000	-2.18316	-3.70013	1.51697	0.994791	-	-	-	-	-
More active compartments in Berkshire	15	60840000	60860000	-2.04796	-3.5487	1.50074	0.995679	-	-	-	-	-
More active compartments in Berkshire	15	60860000	60880000	-1.9618	-3.29767	1.33587	0.987629	-	-	-	-	-
More active compartments in Berkshire	15	60880000	60900000	-1.50437	-3.00542	1.50104	0.990957	-	-	-	-	-
More active compartments in Berkshire	15	60900000	60920000	-1.24192	-2.53914	1.29722	0.993924	-	-	-	-	-
More active compartments in Berkshire	15	60920000	60940000	-1.17648	-2.45323	1.27675	0.991716	-	-	-	-	-
More active compartments in Berkshire	15	60940000	60960000	-1.92227	-2.89159	0.969324	0.996458	-	-	-	-	-
More active compartments in Berkshire	15	60960000	60980000	-2.15664	-3.27529	1.11865	0.993726	-	-	-	-	-
More active compartments in Berkshire	15	60980000	61000000	-2.3141	-3.16739	0.853291	0.995996	-	-	-	-	-
More active compartments in Berkshire	15	61000000	61020000	-2.34378	-3.20845	0.864666	0.995313	-	-	-	-	-
More active compartments in Berkshire	15	61040000	61060000	-2.50227	-3.53501	1.03274	0.994264	-	-	-	-	-
More active compartments in Berkshire	15	61060000	61080000	-2.42559	-3.51453	1.08894	0.995835	-	-	-	-	-
More active compartments in Berkshire	15	61080000	61100000	-2.5365	-3.50334	0.966841	0.994735	-	-	-	-	-
More active compartments in Berkshire	15	61160000	61180000	-1.94428	-2.82479	0.880517	0.995181	-	-	-	-	-
More active compartments in Berkshire	15	61180000	61200000	-2.49294	-3.48843	0.995492	0.994791	-	-	-	-	-
More active compartments in Berkshire	15	61200000	61220000	-3.36263	-4.06743	0.704799	0.982947	-	-	-	-	-
More active compartments in Berkshire	15	61220000	61240000	-3.87962	-4.46342	0.583802	0.997415	-	-	-	-	-
More active compartments in Berkshire	15	61240000	61260000	-4.06241	-4.68644	0.624026	0.996929	-	-	-	-	-
More active compartments in Berkshire	15	71180000	71200000	-1.41079	-2.02484	0.614051	0.996358	-	-	-	-	-
More active compartments in Berkshire	15	91040000	91060000	-4.50415	-5.19223	0.68808	0.993046	-	-	-	-	-
More active compartments in Berkshire	15	91060000	91080000	-4.41892	-4.993	0.574086	0.999413	-	-	-	-	-
More active compartments in Berkshire	15	100260000	100280000	0.953686	0.353998	0.599688	0.991373	-	-	-	-	-
More active compartments in Berkshire	15	100300000	100320000	0.972888	0.355749	0.617139	0.991475	-	-	-	-	-
More active compartments in Berkshire	15	108060000	108080000	-0.50231	-1.03729	0.53498	0.992424	-	-	-	-	-
More active compartments in Berkshire	15	108160000	108180000	-0.773138	-1.27608	0.502946	0.983762	-	-	-	-	-
More active compartments in Berkshire	15	108180000	108200000	-0.76638	-1.40888	0.642498	0.992217	-	-	-	-	-
More active compartments in Berkshire	15	108460000	108480000	-0.623871	-1.13908	0.515212	0.99289	-	-	-	-	-
More active compartments in Berkshire	15	116360000	116380000	-1.81373	-2.88635	1.07262	0.992763	-	-	-	-	-
More active compartments in Berkshire	15	116380000	116400000	-2.09256	-3.07227	0.979711	0.992858	-	-	-	-	-
More active compartments in Berkshire	15	116400000	116420000	-2.30659	-3.1395	0.832909	0.991484	-	-	-	-	-
More active compartments in Berkshire	15	116420000	116440000	-2.82089	-3.4835	0.66261	0.99346	-	-	-	-	-
More active compartments in Berkshire	15	123240000	123260000	-1.12814	-1.63902	0.510883	0.99302	-	-	-	-	-
More active compartments in Berkshire	15	132120000	132140000	5.41484	4.87496	0.539875	0.988932	ENSSSCG00000033015	B3GNT7	0.0617561	0.0617561	-
More active compartments in Berkshire	15	139200000	139220000	1.77567	1.19589	0.579774	0.997563	-	-	-	-	-
More active compartments in Berkshire	15	139220000	139240000	2.14794	1.63168	0.516257	0.998669	ENSSSCG00000047211	Unknown	0.0373794	0.0373794	-
More active compartments in Berkshire	16	1620000	1640000	-3.17041	-3.71511	0.5447	0.992364	-	-	-	-	-
More active compartments in Berkshire	16	14820000	14840000	-2.19638	-2.71967	0.523283	0.994079	-	-	-	-	-
More active compartments in Berkshire	16	14840000	14860000	-2.22293	-2.77038	0.547449	0.990642	-	-	-	-	-
More active compartments in Berkshire	16	14960000	14980000	-1.47857	-2.08863	0.610056	0.986211	-	-	-	-	-
More active compartments in Berkshire	16	15020000	15040000	-1.28114	-1.8423	0.561155	0.989581	-	-	-	-	-
More active compartments in Berkshire	16	30280000	30300000	0.792925	0.28476	0.508165	0.990939	ENSSSCG00000029484	EMB	1.29466	3.11793	0.293401
More active compartments in Berkshire	16	31660000	31680000	-4.06367	-4.61043	0.546764	0.990925	-	-	-	-	-
More active compartments in Berkshire	16	31900000	31920000	-2.58001	-3.18616	0.606154	0.99486	-	-	-	-	-
More active compartments in Berkshire	16	31920000	31940000	-2.31472	-2.85238	0.537658	0.994244	-	-	-	-	-
More active compartments in Berkshire	16	31940000	31960000	-2.051	-2.72547	0.674467	0.992483	-	-	-	-	-
More active compartments in Berkshire	16	31960000	31980000	-1.75057	-2.46822	0.717649	0.992497	-	-	-	-	-
More active compartments in Berkshire	16	58540000	58560000	-3.60003	-4.16279	0.56276	0.988268	-	-	-	-	-
More active compartments in Berkshire	16	58580000	58600000	-3.63121	-4.26667	0.635468	0.992538	ENSSSCG00000047908	Unknown	-	-	-
More active compartments in Berkshire	16	58660000	58680000	-3.54158	-4.16061	0.61903	0.992324	-	-	-	-	-
More active compartments in Berkshire	16	58680000	58700000	-3.55218	-4.37547	0.823289	0.982707	-	-	-	-	-
More active compartments in Berkshire	16	58840000	58860000	-3.64254	-4.17223	0.529686	0.996909	-	-	-	-	-
More active compartments in Berkshire	16	59080000	59100000	-2.97914	-3.52094	0.541799	0.989664	-	-	-	-	-
More active compartments in Berkshire	16	65920000	65940000	2.09635	1.49944	0.596904	0.983979	-	-	-	-	-
More active compartments in Berkshire	16	65940000	65960000	2.23725	1.56808	0.669171	0.987996	-	-	-	-	-
More active compartments in Berkshire	16	65980000	66000000	2.52958	1.6731	0.856487	0.991044	-	-	-	-	-
More active compartments in Berkshire	16	66000000	66020000	2.05487	1.14962	0.905257	0.992681	ENSSSCG00000017054;ENSSSCG00000017058	CYFIP2;MED7	1.68829456987944;21.9184164942057	1.32223990659056;20.8202478194444	0.560795627180144;0.512847484735392
More active compartments in Berkshire	16	66020000	66040000	1.14438	0.463895	0.680484	0.987672	-	-	-	-	-
More active compartments in Berkshire	16	71000000	71020000	-2.38507	-3.26931	0.884243	0.99132	-	-	-	-	-
More active compartments in Berkshire	16	71080000	71100000	-2.43766	-2.96679	0.529131	0.987757	-	-	-	-	-
More active compartments in Berkshire	16	71140000	71160000	-1.35535	-1.90586	0.550509	0.991262	ENSSSCG00000017078	GLRA1	0	0	-
More active compartments in Berkshire	16	71620000	71640000	1.22919	0.640807	0.588388	0.990121	-	-	-	-	-
More active compartments in Berkshire	16	71640000	71660000	1.30586	0.656594	0.649271	0.989629	-	-	-	-	-
More active compartments in Berkshire	16	71660000	71680000	1.55302	0.841599	0.71142	0.990571	-	-	-	-	-
More active compartments in Berkshire	16	71720000	71740000	2.63966	1.98105	0.658609	0.98389	-	-	-	-	-
More active compartments in Berkshire	16	71740000	71760000	3.96411	3.30324	0.660871	0.984375	ENSSSCG00000017087	GM2A	17.2443	13.7492	0.556385
More active compartments in Berkshire	16	71760000	71780000	4.85276	4.35145	0.50131	0.988674	ENSSSCG00000040411	CCDC69	11.6064	10.0041	0.537073
More active compartments in Berkshire	17	2980000	3000000	-4.7759	-5.28147	0.505568	0.987894	-	-	-	-	-
More active compartments in Berkshire	17	3000000	3020000	-4.54074	-5.13029	0.589548	0.991075	-	-	-	-	-
More active compartments in Berkshire	17	3060000	3080000	-4.66482	-5.22429	0.559472	0.986653	-	-	-	-	-
More active compartments in Berkshire	17	3840000	3860000	-4.82834	-5.46683	0.638496	0.989129	-	-	-	-	-
More active compartments in Berkshire	17	30860000	30880000	3.71685	3.16704	0.54981	0.991229	-	-	-	-	-
More active compartments in Berkshire	17	45240000	45260000	-6.30151	-6.89778	0.596269	0.988893	-	-	-	-	-
More active compartments in Berkshire	17	53780000	53800000	-1.64781	-2.23516	0.587354	0.998095	-	-	-	-	-
More active compartments in Berkshire	17	53800000	53820000	-2.01841	-2.5515	0.533094	0.997615	-	-	-	-	-
More active compartments in Berkshire	18	4680000	4700000	2.88765	2.16483	0.722825	0.984441	-	-	-	-	-
More active compartments in Berkshire	18	15040000	15060000	2.512	1.98434	0.527654	0.98753	-	-	-	-	-
More active compartments in Berkshire	18	25720000	25740000	-0.450361	-0.966299	0.515938	0.989481	-	-	-	-	-
More active compartments in Berkshire	18	28220000	28240000	-3.16008	-3.69542	0.53534	0.996082	-	-	-	-	-
More active compartments in Berkshire	18	39980000	40000000	-1.44901	-1.98122	0.532214	0.997432	-	-	-	-	-
More active compartments in Berkshire	18	53380000	53400000	-1.49285	-2.10896	0.616106	0.988775	-	-	-	-	-
More active compartments in Berkshire	18	53400000	53420000	-1.42097	-1.95432	0.533349	0.995436	-	-	-	-	-
More active compartments in Berkshire	18	53640000	53660000	-0.411371	-0.918275	0.506903	0.989793	-	-	-	-	-
Tibetan-specific A compartments	1	31000000	31020000	-0.172087	0.190915	-0.363001	0.984255	ENSSSCG00000004181	VNN1	0.128633	0.128633	-
Tibetan-specific A compartments	1	31300000	31320000	-0.141316	0.228917	-0.370233	0.988462	-	-	-	-	-
Tibetan-specific A compartments	1	33400000	33420000	-0.210418	0.0802754	-0.290693	0.991034	-	-	-	-	-
Tibetan-specific A compartments	1	56320000	56340000	-0.145098	0.260259	-0.405357	0.99326	-	-	-	-	-
Tibetan-specific A compartments	1	72040000	72060000	-0.30377	0.281398	-0.585168	0.992409	-	-	-	-	-
Tibetan-specific A compartments	1	72060000	72080000	-0.304016	0.39698	-0.700996	0.993882	-	-	-	-	-
Tibetan-specific A compartments	1	72080000	72100000	-0.240313	0.315067	-0.55538	0.997159	-	-	-	-	-
Tibetan-specific A compartments	1	72100000	72120000	-0.351633	0.191253	-0.542886	0.995182	-	-	-	-	-
Tibetan-specific A compartments	1	72120000	72140000	-0.219341	0.244542	-0.463884	0.998332	-	-	-	-	-
Tibetan-specific A compartments	1	72140000	72160000	-0.333479	0.25103	-0.58451	0.996351	-	-	-	-	-
Tibetan-specific A compartments	1	72260000	72280000	-0.283143	0.122211	-0.405355	0.995836	-	-	-	-	-
Tibetan-specific A compartments	1	72680000	72700000	-0.631858	0.11216	-0.744018	0.996505	-	-	-	-	-
Tibetan-specific A compartments	1	72720000	72740000	-0.581247	0.102066	-0.683313	0.991004	-	-	-	-	-
Tibetan-specific A compartments	1	73120000	73140000	-0.218213	0.246945	-0.465158	0.993358	ENSSSCG00000031023;ENSSSCG00000037071	Unknown;TMEM256	4.09595536164605;-	0.341420801928948;-	0.923057953767462;-
Tibetan-specific A compartments	1	86140000	86160000	-0.172284	0.276217	-0.448501	0.991317	-	-	-	-	-
Tibetan-specific A compartments	1	95320000	95340000	-0.131463	0.353596	-0.485059	0.99215	-	-	-	-	-
Tibetan-specific A compartments	1	95340000	95360000	-0.349137	0.261494	-0.610631	0.994937	ENSSSCG00000004492	SLC14A1	0.198393	0.198393	-
Tibetan-specific A compartments	1	100000000	100020000	-0.324176	0.23733	-0.561506	0.987362	-	-	-	-	-
Tibetan-specific A compartments	1	100080000	100100000	-0.576532	0.128013	-0.704545	0.994692	-	-	-	-	-
Tibetan-specific A compartments	1	100180000	100200000	-0.567264	0.280488	-0.847753	0.991602	-	-	-	-	-
Tibetan-specific A compartments	1	100200000	100220000	-0.363852	0.576374	-0.940226	0.986664	-	-	-	-	-
Tibetan-specific A compartments	1	100220000	100240000	-0.49561	0.399386	-0.894996	0.992488	-	-	-	-	-
Tibetan-specific A compartments	1	100240000	100260000	-0.429698	0.235724	-0.665422	0.991213	-	-	-	-	-
Tibetan-specific A compartments	1	100260000	100280000	-0.431297	0.212892	-0.644188	0.983227	-	-	-	-	-
Tibetan-specific A compartments	1	100280000	100300000	-0.407215	0.146071	-0.553286	0.993502	-	-	-	-	-
Tibetan-specific A compartments	1	100300000	100320000	-0.551252	0.189962	-0.741214	0.990311	-	-	-	-	-
Tibetan-specific A compartments	1	100340000	100360000	-0.213337	0.148457	-0.361794	0.988631	-	-	-	-	-
Tibetan-specific A compartments	1	105560000	105580000	-0.113016	0.281719	-0.394736	0.99419	-	-	-	-	-
Tibetan-specific A compartments	1	105640000	105660000	-0.0858857	0.220888	-0.306774	0.997069	-	-	-	-	-
Tibetan-specific A compartments	1	105660000	105680000	-0.151747	0.336678	-0.488425	0.994386	-	-	-	-	-
Tibetan-specific A compartments	1	113800000	113820000	-0.477779	0.35225	-0.830029	0.996914	-	-	-	-	-
Tibetan-specific A compartments	1	120000000	120020000	-0.279388	0.414743	-0.694131	0.995855	ENSSSCG00000004628	TMOD2	6.41618	7.9803	0.445677
Tibetan-specific A compartments	1	122400000	122420000	-0.339656	0.271602	-0.611258	0.99674	-	-	-	-	-
Tibetan-specific A compartments	1	122760000	122780000	-0.2403	0.211334	-0.451634	0.995679	-	-	-	-	-
Tibetan-specific A compartments	1	123820000	123840000	-0.390822	0.251997	-0.642819	0.994279	-	-	-	-	-
Tibetan-specific A compartments	1	124080000	124100000	-0.149002	0.171206	-0.320208	0.993066	-	-	-	-	-
Tibetan-specific A compartments	1	126380000	126400000	-0.270412	0.237254	-0.507666	0.993754	-	-	-	-	-
Tibetan-specific A compartments	1	133500000	133520000	-2.81205	1.5718	-4.38385	0.992497	-	-	-	-	-
Tibetan-specific A compartments	1	137140000	137160000	-0.0638751	0.226908	-0.290783	0.987755	-	-	-	-	-
Tibetan-specific A compartments	1	139860000	139880000	-0.168913	0.32871	-0.497623	0.996607	-	-	-	-	-
Tibetan-specific A compartments	1	141320000	141340000	-0.274845	0.414206	-0.689051	0.998188	-	-	-	-	-
Tibetan-specific A compartments	1	145160000	145180000	-0.243758	0.139324	-0.383082	0.991391	-	-	-	-	-
Tibetan-specific A compartments	1	145300000	145320000	-0.225178	0.194747	-0.419924	0.988819	ENSSSCG00000005781	TARS3	-	-	-
Tibetan-specific A compartments	1	187860000	187880000	-0.283515	0.347867	-0.631382	0.992383	-	-	-	-	-
Tibetan-specific A compartments	1	187880000	187900000	-0.273724	0.340871	-0.614594	0.996278	-	-	-	-	-
Tibetan-specific A compartments	1	190260000	190280000	-0.138146	0.518774	-0.65692	0.993866	-	-	-	-	-
Tibetan-specific A compartments	1	190280000	190300000	-0.202586	0.337811	-0.540397	0.993347	-	-	-	-	-
Tibetan-specific A compartments	1	201300000	201320000	-0.128117	0.625179	-0.753297	0.997065	ENSSSCG00000040054	IFN-OMEGA-7	0	0	-
Tibetan-specific A compartments	1	201440000	201460000	-0.137991	0.487861	-0.625852	0.998975	-	-	-	-	-
Tibetan-specific A compartments	1	201620000	201640000	-0.194995	0.532488	-0.727483	0.996527	ENSSSCG00000033910	IFN-OMEGA-2	0	0	-
Tibetan-specific A compartments	1	201640000	201660000	-0.496106	0.309649	-0.805754	0.997977	ENSSSCG00000005152	IFN-DELTA-1	-	-	-
Tibetan-specific A compartments	1	202080000	202100000	-0.283133	0.315231	-0.598363	0.997442	-	-	-	-	-
Tibetan-specific A compartments	1	202280000	202300000	-0.106273	0.640026	-0.746299	0.99915	-	-	-	-	-
Tibetan-specific A compartments	1	205700000	205720000	-0.245813	0.210224	-0.456037	0.996471	-	-	-	-	-
Tibetan-specific A compartments	1	213700000	213720000	-0.17237	0.497263	-0.669633	0.996614	-	-	-	-	-
Tibetan-specific A compartments	1	213740000	213760000	-0.205374	0.4859	-0.691274	0.99543	-	-	-	-	-
Tibetan-specific A compartments	1	214040000	214060000	-0.21628	0.373665	-0.589946	0.995068	-	-	-	-	-
Tibetan-specific A compartments	1	214100000	214120000	-0.180312	0.216903	-0.397215	0.993349	-	-	-	-	-
Tibetan-specific A compartments	1	215240000	215260000	-0.331607	0.114573	-0.44618	0.996641	-	-	-	-	-
Tibetan-specific A compartments	1	215280000	215300000	-0.207428	0.203715	-0.411143	0.998163	-	-	-	-	-
Tibetan-specific A compartments	1	220880000	220900000	-0.274091	0.246472	-0.520563	0.988041	-	-	-	-	-
Tibetan-specific A compartments	1	221400000	221420000	-0.231896	0.56711	-0.799006	0.998164	-	-	-	-	-
Tibetan-specific A compartments	1	221420000	221440000	-0.294584	0.750146	-1.04473	0.993425	-	-	-	-	-
Tibetan-specific A compartments	1	221440000	221460000	-0.370109	0.5196	-0.889709	0.992276	-	-	-	-	-
Tibetan-specific A compartments	1	221460000	221480000	-0.441128	0.544991	-0.986119	0.997272	-	-	-	-	-
Tibetan-specific A compartments	1	222980000	223000000	-0.140723	0.0939674	-0.23469	0.993682	ENSSSCG00000005250	APBA1	0.679568	0.70226	0.491789
Tibetan-specific A compartments	2	13060000	13080000	-0.484234	0.376524	-0.860758	0.995712	-	-	-	-	-
Tibetan-specific A compartments	2	27480000	27500000	-0.18259	0.456634	-0.639224	0.985059	-	-	-	-	-
Tibetan-specific A compartments	2	84700000	84720000	-0.175548	0.311438	-0.486986	0.992839	-	-	-	-	-
Tibetan-specific A compartments	2	91360000	91380000	-0.406091	0.351512	-0.757602	0.999007	-	-	-	-	-
Tibetan-specific A compartments	2	113100000	113120000	-0.0921326	0.0977878	-0.18992	0.995465	-	-	-	-	-
Tibetan-specific A compartments	2	134460000	134480000	-0.420921	0.707208	-1.12813	0.994743	-	-	-	-	-
Tibetan-specific A compartments	3	27300000	27320000	-0.240385	0.381255	-0.62164	0.986923	-	-	-	-	-
Tibetan-specific A compartments	3	45380000	45400000	-0.136262	0.34654	-0.482802	0.995741	-	-	-	-	-
Tibetan-specific A compartments	3	74280000	74300000	-0.192963	0.554198	-0.747161	0.996847	-	-	-	-	-
Tibetan-specific A compartments	3	74300000	74320000	-0.243388	0.339852	-0.58324	0.993905	-	-	-	-	-
Tibetan-specific A compartments	3	74320000	74340000	-0.37345	0.283535	-0.656986	0.993029	-	-	-	-	-
Tibetan-specific A compartments	3	74340000	74360000	-0.398434	0.288753	-0.687187	0.987728	-	-	-	-	-
Tibetan-specific A compartments	3	74380000	74400000	-0.290378	0.345133	-0.635511	0.990375	-	-	-	-	-
Tibetan-specific A compartments	3	74420000	74440000	-0.133731	0.425728	-0.559459	0.997108	-	-	-	-	-
Tibetan-specific A compartments	3	74520000	74540000	-0.205968	0.343822	-0.54979	0.992213	-	-	-	-	-
Tibetan-specific A compartments	3	74540000	74560000	-0.318516	0.161112	-0.479628	0.991225	-	-	-	-	-
Tibetan-specific A compartments	3	74560000	74580000	-0.413355	0.163494	-0.576849	0.989989	-	-	-	-	-
Tibetan-specific A compartments	3	74580000	74600000	-0.367103	0.201246	-0.568349	0.993962	-	-	-	-	-
Tibetan-specific A compartments	3	74600000	74620000	-0.286002	0.177463	-0.463464	0.993483	-	-	-	-	-
Tibetan-specific A compartments	3	74620000	74640000	-0.161925	0.27889	-0.440815	0.991113	ENSSSCG00000045421	Unknown	-	-	-
Tibetan-specific A compartments	3	75640000	75660000	-0.118193	0.341474	-0.459667	0.991534	-	-	-	-	-
Tibetan-specific A compartments	3	75660000	75680000	-0.226176	0.266417	-0.492594	0.992114	-	-	-	-	-
Tibetan-specific A compartments	3	75700000	75720000	-0.192348	0.301666	-0.494014	0.991094	-	-	-	-	-
Tibetan-specific A compartments	3	75720000	75740000	-0.278225	0.377901	-0.656127	0.990492	-	-	-	-	-
Tibetan-specific A compartments	3	75740000	75760000	-0.136432	0.406027	-0.542459	0.992343	-	-	-	-	-
Tibetan-specific A compartments	3	75760000	75780000	-0.143348	0.302976	-0.446324	0.993429	-	-	-	-	-
Tibetan-specific A compartments	3	75780000	75800000	-0.163155	0.4497	-0.612855	0.993232	-	-	-	-	-
Tibetan-specific A compartments	3	75820000	75840000	-0.219095	0.375954	-0.595049	0.997425	-	-	-	-	-
Tibetan-specific A compartments	3	76000000	76020000	-0.314153	0.208157	-0.52231	0.99762	-	-	-	-	-
Tibetan-specific A compartments	3	76020000	76040000	-0.260969	0.272237	-0.533206	0.998557	-	-	-	-	-
Tibetan-specific A compartments	3	76040000	76060000	-0.405483	0.314641	-0.720124	0.994996	-	-	-	-	-
Tibetan-specific A compartments	3	76060000	76080000	-0.105262	0.317993	-0.423256	0.99226	-	-	-	-	-
Tibetan-specific A compartments	3	76140000	76160000	-0.355619	0.187794	-0.543413	0.9915	-	-	-	-	-
Tibetan-specific A compartments	3	76200000	76220000	-0.133968	0.254589	-0.388557	0.99855	-	-	-	-	-
Tibetan-specific A compartments	3	100600000	100620000	-0.380131	0.229269	-0.609401	0.988973	-	-	-	-	-
Tibetan-specific A compartments	3	100620000	100640000	-0.248796	0.19705	-0.445846	0.994743	-	-	-	-	-
Tibetan-specific A compartments	3	100720000	100740000	-0.381566	0.224129	-0.605696	0.991571	-	-	-	-	-
Tibetan-specific A compartments	3	124160000	124180000	-0.25429	0.250061	-0.504351	0.988582	-	-	-	-	-
Tibetan-specific A compartments	3	128800000	128820000	-0.215944	0.303426	-0.51937	0.990374	ENSSSCG00000008646	RNF144A	9.6958	7.92303	0.550309
Tibetan-specific A compartments	3	132100000	132120000	-0.622958	0.44261	-1.06557	0.986037	-	-	-	-	-
Tibetan-specific A compartments	4	3920000	3940000	-0.309086	0.70722	-1.01631	0.976747	-	-	-	-	-
Tibetan-specific A compartments	4	3960000	3980000	-0.389452	0.574873	-0.964325	0.979512	-	-	-	-	-
Tibetan-specific A compartments	4	21360000	21380000	-0.245793	0.163616	-0.409409	0.992738	-	-	-	-	-
Tibetan-specific A compartments	4	21380000	21400000	-0.276746	0.0617399	-0.338485	0.992353	-	-	-	-	-
Tibetan-specific A compartments	4	21500000	21520000	-0.302931	0.528535	-0.831466	0.990939	-	-	-	-	-
Tibetan-specific A compartments	4	21520000	21540000	-0.53821	0.111807	-0.650017	0.993891	-	-	-	-	-
Tibetan-specific A compartments	4	21820000	21840000	-0.388032	0.23065	-0.618682	0.98947	-	-	-	-	-
Tibetan-specific A compartments	4	31760000	31780000	-0.331316	0.246791	-0.578108	0.992775	-	-	-	-	-
Tibetan-specific A compartments	4	31800000	31820000	-0.160903	0.25839	-0.419293	0.993347	-	-	-	-	-
Tibetan-specific A compartments	4	31820000	31840000	-0.291623	0.193587	-0.48521	0.997594	-	-	-	-	-
Tibetan-specific A compartments	4	31920000	31940000	-0.282024	0.0795384	-0.361563	0.9926	-	-	-	-	-
Tibetan-specific A compartments	4	31980000	32000000	-0.399884	0.244358	-0.644242	0.996337	-	-	-	-	-
Tibetan-specific A compartments	4	32000000	32020000	-0.284871	0.317022	-0.601893	0.997008	-	-	-	-	-
Tibetan-specific A compartments	4	35460000	35480000	-0.182403	0.536414	-0.718817	0.990018	-	-	-	-	-
Tibetan-specific A compartments	4	42680000	42700000	-0.336242	0.109336	-0.445578	0.996314	-	-	-	-	-
Tibetan-specific A compartments	4	70960000	70980000	-0.283236	0.218041	-0.501277	0.994484	ENSSSCG00000037637	GGH	14.6984	16.854	0.465841
Tibetan-specific A compartments	4	83860000	83880000	-0.340085	0.0815121	-0.421597	0.994466	-	-	-	-	-
Tibetan-specific A compartments	4	85860000	85880000	-0.20999	0.214577	-0.424567	0.993583	-	-	-	-	-
Tibetan-specific A compartments	4	103540000	103560000	-0.277441	0.622106	-0.899547	0.985788	-	-	-	-	-
Tibetan-specific A compartments	4	111580000	111600000	-0.446284	0.568166	-1.01445	0.986508	-	-	-	-	-
Tibetan-specific A compartments	4	117220000	117240000	-0.391832	0.107923	-0.499755	0.987769	-	-	-	-	-
Tibetan-specific A compartments	4	124780000	124800000	-0.176689	0.276342	-0.45303	0.986057	-	-	-	-	-
Tibetan-specific A compartments	4	127240000	127260000	-0.770235	0.399675	-1.16991	0.991299	-	-	-	-	-
Tibetan-specific A compartments	4	127340000	127360000	-0.85741	0.562458	-1.41987	0.990273	-	-	-	-	-
Tibetan-specific A compartments	5	60720000	60740000	-0.211058	0.391283	-0.602341	0.987496	-	-	-	-	-
Tibetan-specific A compartments	5	92380000	92400000	-0.398186	0.17852	-0.576707	0.986463	-	-	-	-	-
Tibetan-specific A compartments	6	6380000	6400000	-0.356811	0.401565	-0.758376	0.990925	ENSSSCG00000035182	SDR42E1	1.68749	2.10638	0.444793
Tibetan-specific A compartments	6	59900000	59920000	-0.469453	0.138732	-0.608185	0.997235	ENSSSCG00000003306	HELZ2	0.00217939	0.00217939	-
Tibetan-specific A compartments	6	93020000	93040000	-0.366645	0.482238	-0.848883	0.984628	-	-	-	-	-
Tibetan-specific A compartments	6	103120000	103140000	-0.536156	0.248318	-0.784474	0.99553	-	-	-	-	-
Tibetan-specific A compartments	6	105940000	105960000	-0.10025	0.269552	-0.369802	0.997526	-	-	-	-	-
Tibetan-specific A compartments	6	108460000	108480000	-0.306119	0.224105	-0.530224	0.992348	-	-	-	-	-
Tibetan-specific A compartments	6	109200000	109220000	-0.0110236	0.244057	-0.25508	0.995076	-	-	-	-	-
Tibetan-specific A compartments	6	145060000	145080000	-0.209465	0.443383	-0.652848	0.992573	-	-	-	-	-
Tibetan-specific A compartments	6	160780000	160800000	-0.143302	0.226529	-0.369831	0.996314	-	-	-	-	-
Tibetan-specific A compartments	6	168060000	168080000	-0.374053	1.24469	-1.61874	0.978303	ENSSSCG00000003954	FAM183A	0.100563	0.100563	-
Tibetan-specific A compartments	6	168440000	168460000	-0.271649	0.84211	-1.11376	0.99472	-	-	-	-	-
Tibetan-specific A compartments	7	8360000	8380000	-0.475179	0.127461	-0.60264	0.989699	-	-	-	-	-
Tibetan-specific A compartments	7	8420000	8440000	-0.199647	0.217206	-0.416852	0.987215	-	-	-	-	-
Tibetan-specific A compartments	7	15940000	15960000	-0.140781	0.209018	-0.349799	0.99302	-	-	-	-	-
Tibetan-specific A compartments	7	16860000	16880000	-0.0878475	0.178226	-0.266073	0.989285	-	-	-	-	-
Tibetan-specific A compartments	7	17460000	17480000	-0.229567	0.248928	-0.478496	0.988437	ENSSSCG00000039721	PRL	0	0	-
Tibetan-specific A compartments	7	17540000	17560000	-0.247391	0.345465	-0.592856	0.991465	-	-	-	-	-
Tibetan-specific A compartments	7	17560000	17580000	-0.341748	0.271055	-0.612802	0.988571	-	-	-	-	-
Tibetan-specific A compartments	7	17700000	17720000	-0.292415	0.199057	-0.491471	0.993694	-	-	-	-	-
Tibetan-specific A compartments	7	17740000	17760000	-0.357586	0.253687	-0.611273	0.991861	-	-	-	-	-
Tibetan-specific A compartments	7	17760000	17780000	-0.413353	0.232184	-0.645537	0.992657	-	-	-	-	-
Tibetan-specific A compartments	7	17780000	17800000	-0.28995	0.0794142	-0.369364	0.990633	-	-	-	-	-
Tibetan-specific A compartments	7	17800000	17820000	-0.368905	0.328518	-0.697423	0.989005	-	-	-	-	-
Tibetan-specific A compartments	7	19480000	19500000	-0.609955	0.200509	-0.810464	0.992474	ENSSSCG00000001091	KIAA0319	0.0400426	0.0400426	-
Tibetan-specific A compartments	7	34520000	34540000	-0.370968	0.313198	-0.684166	0.991686	-	-	-	-	-
Tibetan-specific A compartments	7	34580000	34600000	-0.352138	0.185754	-0.537892	0.987739	-	-	-	-	-
Tibetan-specific A compartments	7	35180000	35200000	-0.484641	0.284923	-0.769564	0.989349	-	-	-	-	-
Tibetan-specific A compartments	7	35220000	35240000	-0.312259	0.445234	-0.757494	0.988833	-	-	-	-	-
Tibetan-specific A compartments	7	35240000	35260000	-0.167744	0.411803	-0.579546	0.989267	-	-	-	-	-
Tibetan-specific A compartments	7	35640000	35660000	-0.322244	0.733304	-1.05555	0.990635	-	-	-	-	-
Tibetan-specific A compartments	7	35660000	35680000	-0.206029	0.499371	-0.7054	0.991442	-	-	-	-	-
Tibetan-specific A compartments	7	35680000	35700000	-0.373414	0.687698	-1.06111	0.994563	-	-	-	-	-
Tibetan-specific A compartments	7	35700000	35720000	-0.339436	0.744798	-1.08423	0.996083	-	-	-	-	-
Tibetan-specific A compartments	7	48820000	48840000	-0.274747	0.26729	-0.542037	0.989107	-	-	-	-	-
Tibetan-specific A compartments	7	54000000	54020000	-0.240152	0.646926	-0.887078	0.990485	-	-	-	-	-
Tibetan-specific A compartments	7	54040000	54060000	-0.596588	0.646421	-1.24301	0.989212	-	-	-	-	-
Tibetan-specific A compartments	7	54060000	54080000	-0.462336	0.689575	-1.15191	0.987965	-	-	-	-	-
Tibetan-specific A compartments	7	54100000	54120000	-0.380514	0.905028	-1.28554	0.980887	-	-	-	-	-
Tibetan-specific A compartments	7	54140000	54160000	-0.511006	0.746468	-1.25747	0.984882	ENSSSCG00000041319	MYADM	0	0	-
Tibetan-specific A compartments	7	54160000	54180000	-0.419666	1.01853	-1.43819	0.985575	ENSSSCG00000033284	MYADM	0	0	-
Tibetan-specific A compartments	7	64900000	64920000	-0.389482	0.352808	-0.74229	0.996243	-	-	-	-	-
Tibetan-specific A compartments	7	65600000	65620000	-0.325604	0.276371	-0.601975	0.994278	-	-	-	-	-
Tibetan-specific A compartments	7	65720000	65740000	-0.184886	0.566528	-0.751414	0.992241	-	-	-	-	-
Tibetan-specific A compartments	7	65760000	65780000	-0.214841	0.442028	-0.65687	0.992104	-	-	-	-	-
Tibetan-specific A compartments	7	67660000	67680000	-0.390205	0.376798	-0.767002	0.994607	-	-	-	-	-
Tibetan-specific A compartments	7	116220000	116240000	-0.30134	0.231603	-0.532943	0.984286	-	-	-	-	-
Tibetan-specific A compartments	8	4700000	4720000	-0.275458	0.294012	-0.569471	0.987897	-	-	-	-	-
Tibetan-specific A compartments	8	6260000	6280000	-0.485599	0.214161	-0.69976	0.972101	-	-	-	-	-
Tibetan-specific A compartments	8	24020000	24040000	-0.246756	0.28452	-0.531276	0.996612	-	-	-	-	-
Tibetan-specific A compartments	8	24040000	24060000	-0.488148	0.067145	-0.555293	0.989014	-	-	-	-	-
Tibetan-specific A compartments	8	38040000	38060000	-0.324538	0.512754	-0.837293	0.986869	ENSSSCG00000008819	TXK	-	-	-
Tibetan-specific A compartments	8	38060000	38080000	-0.258745	0.642035	-0.90078	0.986136	-	-	-	-	-
Tibetan-specific A compartments	8	38080000	38100000	-0.216996	0.88979	-1.10679	0.990974	-	-	-	-	-
Tibetan-specific A compartments	8	46920000	46940000	-0.292796	0.213904	-0.506701	0.994855	-	-	-	-	-
Tibetan-specific A compartments	8	46960000	46980000	-0.349335	0.223527	-0.572862	0.991809	-	-	-	-	-
Tibetan-specific A compartments	8	46980000	47000000	-0.334395	0.410257	-0.744652	0.996321	-	-	-	-	-
Tibetan-specific A compartments	8	74740000	74760000	-0.2993	0.252639	-0.55194	0.985827	-	-	-	-	-
Tibetan-specific A compartments	8	81540000	81560000	-0.276094	0.270222	-0.546316	0.989823	-	-	-	-	-
Tibetan-specific A compartments	8	88600000	88620000	-0.144904	0.0686106	-0.213514	0.99624	ENSSSCG00000022649	SLC7A11	1.88155	2.92827	0.391189
Tibetan-specific A compartments	8	89100000	89120000	-0.383174	0.141828	-0.525002	0.995248	-	-	-	-	-
Tibetan-specific A compartments	8	89120000	89140000	-0.417042	0.123777	-0.540819	0.996902	-	-	-	-	-
Tibetan-specific A compartments	8	89200000	89220000	-0.313113	0.190604	-0.503717	0.988298	-	-	-	-	-
Tibetan-specific A compartments	8	89220000	89240000	-0.207487	0.153759	-0.361246	0.991705	-	-	-	-	-
Tibetan-specific A compartments	8	89280000	89300000	-0.436652	0.0755478	-0.512199	0.997778	-	-	-	-	-
Tibetan-specific A compartments	8	95880000	95900000	-0.341286	0.191482	-0.532767	0.992224	ENSSSCG00000043674	Unknown	-	-	-
Tibetan-specific A compartments	8	99160000	99180000	-0.148269	0.109658	-0.257927	0.998845	-	-	-	-	-
Tibetan-specific A compartments	8	113380000	113400000	-0.10637	0.445723	-0.552093	0.985376	-	-	-	-	-
Tibetan-specific A compartments	8	115700000	115720000	-0.172794	0.547	-0.719794	0.990149	-	-	-	-	-
Tibetan-specific A compartments	8	120980000	121000000	-0.560586	0.13901	-0.699596	0.989654	-	-	-	-	-
Tibetan-specific A compartments	8	121220000	121240000	-0.543187	0.146849	-0.690037	0.988624	ENSSSCG00000009184	ADH4	-	-	-
Tibetan-specific A compartments	8	129860000	129880000	-0.334555	0.196707	-0.531262	0.987981	-	-	-	-	-
Tibetan-specific A compartments	8	133580000	133600000	-0.510245	0.411066	-0.921311	0.981544	-	-	-	-	-
Tibetan-specific A compartments	8	133980000	134000000	-0.221726	0.552754	-0.77448	0.991032	-	-	-	-	-
Tibetan-specific A compartments	8	134020000	134040000	-0.353095	0.378253	-0.731348	0.986641	-	-	-	-	-
Tibetan-specific A compartments	8	136000000	136020000	-0.206295	0.972543	-1.17884	0.976603	-	-	-	-	-
Tibetan-specific A compartments	8	138120000	138140000	-0.164471	0.341862	-0.506333	0.996707	-	-	-	-	-
Tibetan-specific A compartments	9	34600000	34620000	-0.135758	0.384586	-0.520345	0.994309	-	-	-	-	-
Tibetan-specific A compartments	9	37220000	37240000	-0.0646916	0.257256	-0.321947	0.993576	-	-	-	-	-
Tibetan-specific A compartments	9	38020000	38040000	-0.219547	0.20116	-0.420707	0.990234	-	-	-	-	-
Tibetan-specific A compartments	9	42280000	42300000	-0.296032	0.168478	-0.46451	0.986585	-	-	-	-	-
Tibetan-specific A compartments	9	87780000	87800000	-0.137595	0.202638	-0.340233	0.992742	-	-	-	-	-
Tibetan-specific A compartments	9	106860000	106880000	-0.191494	0.264982	-0.456476	0.995566	-	-	-	-	-
Tibetan-specific A compartments	9	107880000	107900000	-0.200431	0.218593	-0.419024	0.991665	ENSSSCG00000032905	LAMB4	1.21602	3.47148	0.259418
Tibetan-specific A compartments	9	108200000	108220000	-0.21863	0.147036	-0.365666	0.985247	-	-	-	-	-
Tibetan-specific A compartments	9	116340000	116360000	-0.0476745	0.117525	-0.165199	0.991184	-	-	-	-	-
Tibetan-specific A compartments	9	117160000	117180000	-0.151838	0.580875	-0.732713	0.987329	ENSSSCG00000015507	TNN	0.528698	5.12145	0.0935724
Tibetan-specific A compartments	9	117180000	117200000	-0.169709	0.512295	-0.682004	0.986185	-	-	-	-	-
Tibetan-specific A compartments	9	117200000	117220000	-0.271729	0.49419	-0.765919	0.985588	-	-	-	-	-
Tibetan-specific A compartments	9	117220000	117240000	-0.48336	0.310446	-0.793806	0.984702	-	-	-	-	-
Tibetan-specific A compartments	9	117300000	117320000	-0.196581	0.352737	-0.549318	0.988853	-	-	-	-	-
Tibetan-specific A compartments	9	117860000	117880000	-0.306336	0.204528	-0.510864	0.990294	-	-	-	-	-
Tibetan-specific A compartments	9	118340000	118360000	-0.453474	0.312257	-0.765731	0.995064	-	-	-	-	-
Tibetan-specific A compartments	9	119540000	119560000	-1.3091	0.491518	-1.80062	0.987474	-	-	-	-	-
Tibetan-specific A compartments	9	119560000	119580000	-1.19646	0.628147	-1.82461	0.988692	-	-	-	-	-
Tibetan-specific A compartments	9	119580000	119600000	-1.00367	1.04187	-2.04554	0.98807	-	-	-	-	-
Tibetan-specific A compartments	9	119600000	119620000	-0.638234	1.25593	-1.89416	0.988956	-	-	-	-	-
Tibetan-specific A compartments	9	119620000	119640000	-0.857078	0.773184	-1.63026	0.989528	-	-	-	-	-
Tibetan-specific A compartments	9	119640000	119660000	-0.740659	0.671106	-1.41176	0.990151	-	-	-	-	-
Tibetan-specific A compartments	9	119660000	119680000	-0.886484	1.12137	-2.00785	0.992347	-	-	-	-	-
Tibetan-specific A compartments	9	119680000	119700000	-0.921566	0.719202	-1.64077	0.994549	-	-	-	-	-
Tibetan-specific A compartments	9	119700000	119720000	-0.900941	0.807079	-1.70802	0.988529	-	-	-	-	-
Tibetan-specific A compartments	9	119720000	119740000	-0.81489	0.791542	-1.60643	0.987983	-	-	-	-	-
Tibetan-specific A compartments	9	119740000	119760000	-0.775118	0.778356	-1.55347	0.990425	-	-	-	-	-
Tibetan-specific A compartments	9	119760000	119780000	-0.310196	0.679831	-0.990026	0.993989	-	-	-	-	-
Tibetan-specific A compartments	10	580000	600000	-0.525273	0.300412	-0.825684	0.987034	-	-	-	-	-
Tibetan-specific A compartments	10	7360000	7380000	-0.42533	0.426788	-0.852118	0.991899	-	-	-	-	-
Tibetan-specific A compartments	10	7760000	7780000	-0.242277	0.380677	-0.622954	0.991411	-	-	-	-	-
Tibetan-specific A compartments	10	16840000	16860000	-0.303158	0.253826	-0.556984	0.988102	-	-	-	-	-
Tibetan-specific A compartments	10	17020000	17040000	-0.147134	0.37661	-0.523744	0.985273	-	-	-	-	-
Tibetan-specific A compartments	10	28800000	28820000	-0.228077	0.283467	-0.511544	0.991361	-	-	-	-	-
Tibetan-specific A compartments	10	52840000	52860000	-0.223695	0.27675	-0.500446	0.988067	-	-	-	-	-
Tibetan-specific A compartments	10	64140000	64160000	-0.205634	0.413779	-0.619413	0.985517	-	-	-	-	-
Tibetan-specific A compartments	11	6140000	6160000	-0.59422	0.141283	-0.735502	0.981564	-	-	-	-	-
Tibetan-specific A compartments	11	10180000	10200000	-0.610303	0.435809	-1.04611	0.985813	-	-	-	-	-
Tibetan-specific A compartments	11	10200000	10220000	-0.325676	0.480008	-0.805684	0.991148	-	-	-	-	-
Tibetan-specific A compartments	11	10240000	10260000	-0.451396	0.39447	-0.845866	0.991533	-	-	-	-	-
Tibetan-specific A compartments	11	10260000	10280000	-0.531911	0.44076	-0.972671	0.985164	-	-	-	-	-
Tibetan-specific A compartments	11	10280000	10300000	-0.605043	0.460463	-1.06551	0.986613	-	-	-	-	-
Tibetan-specific A compartments	11	10300000	10320000	-0.370007	0.409846	-0.779853	0.993491	-	-	-	-	-
Tibetan-specific A compartments	11	10320000	10340000	-0.799153	0.273385	-1.07254	0.989588	-	-	-	-	-
Tibetan-specific A compartments	11	10340000	10360000	-0.669025	0.369737	-1.03876	0.989429	-	-	-	-	-
Tibetan-specific A compartments	11	11060000	11080000	-0.229761	0.456643	-0.686404	0.988838	-	-	-	-	-
Tibetan-specific A compartments	11	11160000	11180000	-0.481882	0.518496	-1.00038	0.992435	-	-	-	-	-
Tibetan-specific A compartments	11	11200000	11220000	-0.421829	0.537859	-0.959687	0.995338	-	-	-	-	-
Tibetan-specific A compartments	11	11420000	11440000	-0.562878	0.527311	-1.09019	0.992165	-	-	-	-	-
Tibetan-specific A compartments	11	11600000	11620000	-0.198683	0.898701	-1.09738	0.984511	-	-	-	-	-
Tibetan-specific A compartments	11	11660000	11680000	-0.285536	0.559652	-0.845187	0.985742	-	-	-	-	-
Tibetan-specific A compartments	11	12040000	12060000	-0.431352	0.612874	-1.04423	0.978107	-	-	-	-	-
Tibetan-specific A compartments	11	12100000	12120000	-0.764131	0.269043	-1.03317	0.977377	-	-	-	-	-
Tibetan-specific A compartments	11	45440000	45460000	-0.180039	0.065974	-0.246013	0.98767	-	-	-	-	-
Tibetan-specific A compartments	11	63480000	63500000	-0.563422	0.192905	-0.756327	0.989258	-	-	-	-	-
Tibetan-specific A compartments	11	68660000	68680000	-0.222536	0.387753	-0.610289	0.993929	-	-	-	-	-
Tibetan-specific A compartments	11	75640000	75660000	-0.441471	0.380154	-0.821625	0.97541	-	-	-	-	-
Tibetan-specific A compartments	12	34300000	34320000	-0.441287	0.461913	-0.903199	0.986902	-	-	-	-	-
Tibetan-specific A compartments	12	34320000	34340000	-0.454539	0.399259	-0.853799	0.991158	-	-	-	-	-
Tibetan-specific A compartments	12	37720000	37740000	-0.257497	0.460875	-0.718372	0.995046	ENSSSCG00000039473	USP32	14.412	14.4343	0.499614
Tibetan-specific A compartments	12	38060000	38080000	-0.378943	0.586363	-0.965306	0.993075	ENSSSCG00000017682;ENSSSCG00000017688;ENSSSCG00000035006	MYO19;GGNBP2;PIGW	4.18856563907262;-;3.59952814881727	4.48576428152987;-;3.50550861323523	0.482869072010313;-;0.506616400360107
Tibetan-specific A compartments	12	38080000	38100000	-0.495514	0.22697	-0.722484	0.996047	-	-	-	-	-
Tibetan-specific A compartments	12	41140000	41160000	-0.13361	0.181126	-0.314735	0.999357	-	-	-	-	-
Tibetan-specific A compartments	12	48760000	48780000	-0.974207	0.956824	-1.93103	0.992116	ENSSSCG00000017835	CLUH	50.0601	51.3197	0.493787
Tibetan-specific A compartments	12	49780000	49800000	-1.06723	0.932547	-1.99977	0.981589	ENSSSCG00000017868	P2RX5	85.8245	109.95	0.438386
Tibetan-specific A compartments	12	49800000	49820000	-1.37585	0.721478	-2.09733	0.985966	-	-	-	-	-
Tibetan-specific A compartments	12	49820000	49840000	-1.58976	0.676433	-2.2662	0.988605	-	-	-	-	-
Tibetan-specific A compartments	12	49840000	49860000	-1.46474	0.652078	-2.11681	0.985863	-	-	-	-	-
Tibetan-specific A compartments	12	49860000	49880000	-1.36629	0.630418	-1.99671	0.985346	-	-	-	-	-
Tibetan-specific A compartments	12	49880000	49900000	-0.748228	1.1397	-1.88793	0.993316	-	-	-	-	-
Tibetan-specific A compartments	12	49900000	49920000	-0.395274	1.2113	-1.60657	0.984839	ENSSSCG00000017869;ENSSSCG00000017870	ITGAE;NCBP3	2.93979184900012;5.46543642454638	2.73334668036988;4.72813812432362	0.518194969817982;0.536164855453208
Tibetan-specific A compartments	12	55280000	55300000	-0.313861	0.508803	-0.822664	0.986777	-	-	-	-	-
Tibetan-specific A compartments	12	55360000	55380000	-0.619795	0.203329	-0.823124	0.987433	ENSSSCG00000018007	MYH3	75.8464	76.9285	0.496458
Tibetan-specific A compartments	12	61440000	61460000	-1.00533	0.97578	-1.98111	0.991267	-	-	-	-	-
Tibetan-specific A compartments	12	61480000	61500000	-0.950995	0.911869	-1.86286	0.990139	-	-	-	-	-
Tibetan-specific A compartments	13	1620000	1640000	-0.0906866	0.32719	-0.417876	0.989323	-	-	-	-	-
Tibetan-specific A compartments	13	27560000	27580000	-0.286825	0.411753	-0.698578	0.990306	ENSSSCG00000029268	TOPAZ1	0.726234	3.59605	0.168021
Tibetan-specific A compartments	13	147680000	147700000	-0.344054	0.0974408	-0.441495	0.989997	ENSSSCG00000033637	C3orf52	-	-	-
Tibetan-specific A compartments	13	169900000	169920000	-0.317435	0.182288	-0.499723	0.9981	-	-	-	-	-
Tibetan-specific A compartments	13	169960000	169980000	-0.38859	0.142028	-0.530618	0.997426	-	-	-	-	-
Tibetan-specific A compartments	13	169980000	170000000	-0.417948	0.0532753	-0.471223	0.991752	-	-	-	-	-
Tibetan-specific A compartments	13	195200000	195220000	-0.258782	0.0645531	-0.323335	0.97891	-	-	-	-	-
Tibetan-specific A compartments	14	2360000	2380000	-0.203808	0.187974	-0.391782	0.987889	-	-	-	-	-
Tibetan-specific A compartments	14	33420000	33440000	-0.35498	0.339034	-0.694014	0.995848	-	-	-	-	-
Tibetan-specific A compartments	14	36440000	36460000	-0.219213	0.377107	-0.59632	0.999725	-	-	-	-	-
Tibetan-specific A compartments	14	57440000	57460000	-0.157994	0.343099	-0.501092	0.98743	-	-	-	-	-
Tibetan-specific A compartments	14	58540000	58560000	-0.16471	0.573187	-0.737897	0.985209	-	-	-	-	-
Tibetan-specific A compartments	14	58600000	58620000	-0.286276	0.528073	-0.814349	0.990153	-	-	-	-	-
Tibetan-specific A compartments	14	85560000	85580000	-0.7188	0.496248	-1.21505	0.99885	ENSSSCG00000027329	Unknown	0.0699151	0.0699151	-
Tibetan-specific A compartments	14	89680000	89700000	-0.430614	0.0236816	-0.454296	0.99018	ENSSSCG00000010386	Unknown	-	-	-
Tibetan-specific A compartments	14	89940000	89960000	-0.406493	0.0870013	-0.493494	0.988384	-	-	-	-	-
Tibetan-specific A compartments	14	90020000	90040000	-0.206551	0.334702	-0.541253	0.994537	-	-	-	-	-
Tibetan-specific A compartments	14	91120000	91140000	-0.314314	0.467857	-0.782171	0.991224	ENSSSCG00000029662	RASSF4	14.0081	15.392	0.476465
Tibetan-specific A compartments	14	100240000	100260000	-0.227541	0.188903	-0.416443	0.993879	-	-	-	-	-
Tibetan-specific A compartments	14	104900000	104920000	-0.463195	0.473378	-0.936573	0.986001	-	-	-	-	-
Tibetan-specific A compartments	14	115080000	115100000	-0.483667	0.251556	-0.735223	0.996129	-	-	-	-	-
Tibetan-specific A compartments	14	122940000	122960000	-0.106923	0.284658	-0.391582	0.992376	-	-	-	-	-
Tibetan-specific A compartments	14	122980000	123000000	-0.105403	0.25743	-0.362833	0.995255	-	-	-	-	-
Tibetan-specific A compartments	14	130640000	130660000	-0.346623	0.299523	-0.646146	0.975125	-	-	-	-	-
Tibetan-specific A compartments	15	1640000	1660000	-0.163923	0.494108	-0.658031	0.987199	-	-	-	-	-
Tibetan-specific A compartments	15	1660000	1680000	-0.170968	0.447405	-0.618373	0.993066	-	-	-	-	-
Tibetan-specific A compartments	15	4920000	4940000	-0.173662	0.137247	-0.310909	0.994828	-	-	-	-	-
Tibetan-specific A compartments	15	15980000	16000000	-0.43049	0.185041	-0.615532	0.990777	-	-	-	-	-
Tibetan-specific A compartments	15	16120000	16140000	-1.39937	0.13714	-1.53651	0.995676	-	-	-	-	-
Tibetan-specific A compartments	15	17400000	17420000	-0.185137	0.717906	-0.903043	0.982304	-	-	-	-	-
Tibetan-specific A compartments	15	32680000	32700000	-0.136105	0.255365	-0.39147	0.980871	-	-	-	-	-
Tibetan-specific A compartments	15	58720000	58740000	-0.542624	0.17844	-0.721064	0.990092	-	-	-	-	-
Tibetan-specific A compartments	15	58740000	58760000	-0.308416	0.373911	-0.682327	0.993272	-	-	-	-	-
Tibetan-specific A compartments	15	92240000	92260000	-0.19432	0.154812	-0.349132	0.992165	-	-	-	-	-
Tibetan-specific A compartments	15	92520000	92540000	-0.390251	0.142164	-0.532415	0.993767	-	-	-	-	-
Tibetan-specific A compartments	15	92560000	92580000	-0.23616	0.176885	-0.413045	0.989437	-	-	-	-	-
Tibetan-specific A compartments	15	93820000	93840000	-0.142311	0.208737	-0.351048	0.996951	-	-	-	-	-
Tibetan-specific A compartments	15	93840000	93860000	-0.0827666	0.205761	-0.288528	0.99043	-	-	-	-	-
Tibetan-specific A compartments	15	94480000	94500000	-0.413612	0.270753	-0.684365	0.994939	-	-	-	-	-
Tibetan-specific A compartments	15	109660000	109680000	-0.398682	0.238089	-0.636771	0.987952	ENSSSCG00000051399	Unknown	-	-	-
Tibetan-specific A compartments	15	115480000	115500000	-0.374021	0.0923213	-0.466342	0.993148	-	-	-	-	-
Tibetan-specific A compartments	15	115520000	115540000	-0.119909	0.254118	-0.374027	0.992573	-	-	-	-	-
Tibetan-specific A compartments	15	131280000	131300000	-0.208339	0.328139	-0.536477	0.99161	ENSSSCG00000016263	SP100	15.4425	15.2774	0.502687
Tibetan-specific A compartments	16	4320000	4340000	-0.237445	0.150526	-0.387972	0.983893	-	-	-	-	-
Tibetan-specific A compartments	16	20640000	20660000	-0.35165	0.43209	-0.78374	0.985252	-	-	-	-	-
Tibetan-specific A compartments	16	21240000	21260000	-0.242091	0.534691	-0.776782	0.983953	-	-	-	-	-
Tibetan-specific A compartments	16	21260000	21280000	-0.458958	0.342434	-0.801392	0.992068	-	-	-	-	-
Tibetan-specific A compartments	16	21280000	21300000	-0.386913	0.3617	-0.748613	0.991922	-	-	-	-	-
Tibetan-specific A compartments	16	21300000	21320000	-0.496631	0.43342	-0.930052	0.990839	ENSSSCG00000016832	IL7R	0.0617376	0.0617376	-
Tibetan-specific A compartments	16	21320000	21340000	-0.462649	0.562995	-1.02564	0.985756	-	-	-	-	-
Tibetan-specific A compartments	16	34920000	34940000	-0.113992	0.60476	-0.718752	0.990121	-	-	-	-	-
Tibetan-specific A compartments	16	34960000	34980000	-0.114069	0.442909	-0.556978	0.991685	-	-	-	-	-
Tibetan-specific A compartments	16	74200000	74220000	-0.170519	0.130481	-0.301	0.978145	-	-	-	-	-
Tibetan-specific A compartments	16	75040000	75060000	-0.276332	0.177823	-0.454155	0.983911	-	-	-	-	-
Tibetan-specific A compartments	16	75600000	75620000	-0.430008	0.398575	-0.828584	0.980337	-	-	-	-	-
Tibetan-specific A compartments	16	75620000	75640000	-0.656297	0.346725	-1.00302	0.982362	-	-	-	-	-
Tibetan-specific A compartments	16	75640000	75660000	-0.688171	0.239811	-0.927981	0.980324	-	-	-	-	-
Tibetan-specific A compartments	16	75660000	75680000	-0.753609	0.459774	-1.21338	0.977869	-	-	-	-	-
Tibetan-specific A compartments	16	75680000	75700000	-0.762406	0.175346	-0.937753	0.980805	-	-	-	-	-
Tibetan-specific A compartments	16	75700000	75720000	-1.10206	0.285868	-1.38793	0.977912	-	-	-	-	-
Tibetan-specific A compartments	16	75720000	75740000	-1.10864	0.34617	-1.45481	0.984163	-	-	-	-	-
Tibetan-specific A compartments	16	75740000	75760000	-1.2962	0.30055	-1.59675	0.9822	-	-	-	-	-
Tibetan-specific A compartments	16	75760000	75780000	-1.37427	0.420944	-1.79521	0.986712	-	-	-	-	-
Tibetan-specific A compartments	16	75780000	75800000	-1.4681	0.242318	-1.71042	0.985816	-	-	-	-	-
Tibetan-specific A compartments	16	75800000	75820000	-1.35226	0.479882	-1.83214	0.983626	-	-	-	-	-
Tibetan-specific A compartments	16	75820000	75840000	-1.38154	0.470438	-1.85198	0.976059	-	-	-	-	-
Tibetan-specific A compartments	16	75840000	75860000	-1.34293	0.557398	-1.90033	0.983679	-	-	-	-	-
Tibetan-specific A compartments	16	75860000	75880000	-0.975016	0.981781	-1.9568	0.983759	-	-	-	-	-
Tibetan-specific A compartments	16	75880000	75900000	-0.660892	1.14397	-1.80486	0.982643	-	-	-	-	-
Tibetan-specific A compartments	16	75900000	75920000	-0.619296	1.05749	-1.67679	0.982432	-	-	-	-	-
Tibetan-specific A compartments	16	75920000	75940000	-0.613793	1.03738	-1.65117	0.984525	-	-	-	-	-
Tibetan-specific A compartments	16	75940000	75960000	-0.526629	0.992838	-1.51947	0.981744	-	-	-	-	-
Tibetan-specific A compartments	16	75960000	75980000	-0.755239	0.876103	-1.63134	0.980613	-	-	-	-	-
Tibetan-specific A compartments	16	75980000	76000000	-0.516606	1.19163	-1.70824	0.981523	-	-	-	-	-
Tibetan-specific A compartments	16	76000000	76020000	-0.568468	0.751516	-1.31998	0.982938	-	-	-	-	-
Tibetan-specific A compartments	16	76020000	76040000	-0.616662	1.02523	-1.64189	0.984239	-	-	-	-	-
Tibetan-specific A compartments	16	76040000	76060000	-0.650232	0.854472	-1.5047	0.986212	-	-	-	-	-
Tibetan-specific A compartments	16	76060000	76080000	-0.336064	1.09245	-1.42851	0.978135	-	-	-	-	-
Tibetan-specific A compartments	16	78480000	78500000	-0.371905	0.305727	-0.677632	0.983779	-	-	-	-	-
Tibetan-specific A compartments	17	5080000	5100000	-0.302512	0.234054	-0.536566	0.986983	-	-	-	-	-
Tibetan-specific A compartments	17	12540000	12560000	-0.614642	0.41531	-1.02995	0.999381	-	-	-	-	-
Tibetan-specific A compartments	17	26060000	26080000	-0.316161	0.465577	-0.781737	0.994347	-	-	-	-	-
Tibetan-specific A compartments	17	26080000	26100000	-0.19075	0.386384	-0.577134	0.988712	-	-	-	-	-
Tibetan-specific A compartments	17	26280000	26300000	-0.182175	0.449924	-0.632099	0.990598	-	-	-	-	-
Tibetan-specific A compartments	17	26580000	26600000	-0.204066	0.222139	-0.426205	0.991913	ENSSSCG00000007093	ZNF133	5.83085	3.18704	0.646587
Tibetan-specific A compartments	17	28540000	28560000	-0.244	0.426464	-0.670464	0.993049	-	-	-	-	-
Tibetan-specific A compartments	18	980000	1000000	-0.34045	0.173271	-0.513722	0.975731	-	-	-	-	-
Tibetan-specific A compartments	18	1000000	1020000	-0.118361	0.377662	-0.496023	0.973916	-	-	-	-	-
Tibetan-specific A compartments	18	1060000	1080000	-0.220594	0.0538	-0.274394	0.982674	-	-	-	-	-
Tibetan-specific A compartments	18	1940000	1960000	-0.129087	0.462732	-0.591818	0.97979	-	-	-	-	-
Tibetan-specific A compartments	18	2480000	2500000	-0.0780522	0.350414	-0.428466	0.991393	-	-	-	-	-
Tibetan-specific A compartments	18	6700000	6720000	-0.752397	0.237248	-0.989645	0.985665	-	-	-	-	-
Tibetan-specific A compartments	18	37700000	37720000	-0.264392	0.161083	-0.425475	0.99124	ENSSSCG00000016658	ANLN	6.46199	6.27214	0.507454
Tibetan-specific A compartments	18	47800000	47820000	-0.648315	0.526236	-1.17455	0.986758	-	-	-	-	-
Tibetan-specific A compartments	18	47820000	47840000	-0.53555	0.586424	-1.12197	0.98796	-	-	-	-	-
Tibetan-specific A compartments	18	54980000	55000000	-0.235428	0.42993	-0.665357	0.988537	-	-	-	-	-
More active compartments in Tibetan	1	11640000	11660000	1.75746	2.29999	-0.542531	0.99484	-	-	-	-	-
More active compartments in Tibetan	1	11740000	11760000	2.56044	3.14889	-0.588453	0.989165	-	-	-	-	-
More active compartments in Tibetan	1	11760000	11780000	2.85599	3.3816	-0.525608	0.984929	-	-	-	-	-
More active compartments in Tibetan	1	11800000	11820000	2.2137	2.75579	-0.542089	0.983009	-	-	-	-	-
More active compartments in Tibetan	1	11820000	11840000	2.49401	3.1209	-0.626883	0.986445	-	-	-	-	-
More active compartments in Tibetan	1	12000000	12020000	2.88847	3.44586	-0.55739	0.989357	-	-	-	-	-
More active compartments in Tibetan	1	12780000	12800000	-3.81456	-3.25998	-0.554577	0.988115	-	-	-	-	-
More active compartments in Tibetan	1	12820000	12840000	-4.16591	-3.61953	-0.546376	0.980413	-	-	-	-	-
More active compartments in Tibetan	1	12860000	12880000	-4.15478	-3.5781	-0.57668	0.985	-	-	-	-	-
More active compartments in Tibetan	1	12900000	12920000	-4.08933	-3.50936	-0.579966	0.983377	-	-	-	-	-
More active compartments in Tibetan	1	12920000	12940000	-3.9211	-3.05655	-0.864559	0.988492	-	-	-	-	-
More active compartments in Tibetan	1	12980000	13000000	-3.63204	-3.0993	-0.532744	0.98208	-	-	-	-	-
More active compartments in Tibetan	1	13020000	13040000	-3.97361	-3.18673	-0.786877	0.990103	-	-	-	-	-
More active compartments in Tibetan	1	13040000	13060000	-4.21267	-3.27816	-0.93451	0.985992	-	-	-	-	-
More active compartments in Tibetan	1	13060000	13080000	-3.99904	-3.41696	-0.582076	0.9893	-	-	-	-	-
More active compartments in Tibetan	1	13080000	13100000	-4.19161	-3.52702	-0.664589	0.983811	-	-	-	-	-
More active compartments in Tibetan	1	13120000	13140000	-4.11542	-3.31377	-0.801652	0.985675	-	-	-	-	-
More active compartments in Tibetan	1	13140000	13160000	-4.2288	-3.48431	-0.744487	0.983314	-	-	-	-	-
More active compartments in Tibetan	1	13160000	13180000	-4.09163	-3.23618	-0.855451	0.985628	-	-	-	-	-
More active compartments in Tibetan	1	13180000	13200000	-4.11371	-3.12643	-0.987278	0.983285	-	-	-	-	-
More active compartments in Tibetan	1	13200000	13220000	-4.00379	-3.16449	-0.839302	0.987269	-	-	-	-	-
More active compartments in Tibetan	1	13220000	13240000	-3.97831	-3.09392	-0.884387	0.97979	-	-	-	-	-
More active compartments in Tibetan	1	13240000	13260000	-4.10599	-3.34029	-0.765706	0.976439	-	-	-	-	-
More active compartments in Tibetan	1	13260000	13280000	-4.08814	-3.24449	-0.84365	0.983361	-	-	-	-	-
More active compartments in Tibetan	1	13280000	13300000	-3.76924	-2.92303	-0.846209	0.985211	-	-	-	-	-
More active compartments in Tibetan	1	13300000	13320000	-3.71505	-2.76787	-0.947183	0.989321	-	-	-	-	-
More active compartments in Tibetan	1	13320000	13340000	-2.85106	-1.95772	-0.893346	0.990044	-	-	-	-	-
More active compartments in Tibetan	1	13340000	13360000	-2.53327	-1.73711	-0.796159	0.99031	ENSSSCG00000004075	RGS17	0.138706	0.152938	-
More active compartments in Tibetan	1	13360000	13380000	-2.87002	-2.08484	-0.785184	0.984382	-	-	-	-	-
More active compartments in Tibetan	1	16120000	16140000	3.67723	4.22277	-0.545541	0.990227	ENSSSCG00000004101	LRP11	7.23235	7.84932	0.479546
More active compartments in Tibetan	1	49240000	49260000	-2.76699	-2.20654	-0.560455	0.997414	-	-	-	-	-
More active compartments in Tibetan	1	70120000	70140000	-2.20704	-1.60789	-0.599153	0.996101	-	-	-	-	-
More active compartments in Tibetan	1	72620000	72640000	-1.04319	-0.416137	-0.627049	0.995565	-	-	-	-	-
More active compartments in Tibetan	1	72640000	72660000	-0.853859	-0.226047	-0.627812	0.987802	-	-	-	-	-
More active compartments in Tibetan	1	85740000	85760000	-1.14673	-0.533649	-0.61308	0.996442	-	-	-	-	-
More active compartments in Tibetan	1	85780000	85800000	-1.13476	-0.538256	-0.596508	0.996309	-	-	-	-	-
More active compartments in Tibetan	1	96340000	96360000	1.46487	2.1831	-0.718224	0.988869	-	-	-	-	-
More active compartments in Tibetan	1	96840000	96860000	-2.09245	-1.56824	-0.52421	0.992912	ENSSSCG00000005767	SKOR2	0	0	-
More active compartments in Tibetan	1	100020000	100040000	-0.865908	-0.316178	-0.54973	0.987807	-	-	-	-	-
More active compartments in Tibetan	1	100040000	100060000	-0.960945	-0.365009	-0.595936	0.99638	-	-	-	-	-
More active compartments in Tibetan	1	100580000	100600000	2.36811	2.91369	-0.545572	0.997676	-	-	-	-	-
More active compartments in Tibetan	1	100700000	100720000	1.19932	1.7292	-0.529887	0.993458	-	-	-	-	-
More active compartments in Tibetan	1	100820000	100840000	-1.19271	-0.644291	-0.54842	0.988124	-	-	-	-	-
More active compartments in Tibetan	1	100840000	100860000	-1.21084	-0.60568	-0.605165	0.997553	-	-	-	-	-
More active compartments in Tibetan	1	100860000	100880000	-1.04192	-0.485538	-0.556377	0.999375	-	-	-	-	-
More active compartments in Tibetan	1	102660000	102680000	-4.91828	-4.33477	-0.583518	0.996701	-	-	-	-	-
More active compartments in Tibetan	1	103280000	103300000	-5.41777	-4.8658	-0.551967	0.995866	-	-	-	-	-
More active compartments in Tibetan	1	103340000	103360000	-5.25836	-4.67179	-0.586578	0.995499	-	-	-	-	-
More active compartments in Tibetan	1	103360000	103380000	-5.12269	-4.51492	-0.607775	0.994595	-	-	-	-	-
More active compartments in Tibetan	1	103440000	103460000	-5.01643	-4.39312	-0.623306	0.990469	-	-	-	-	-
More active compartments in Tibetan	1	103480000	103500000	-4.58383	-3.84855	-0.735281	0.991797	-	-	-	-	-
More active compartments in Tibetan	1	103600000	103620000	-3.0112	-2.31505	-0.696151	0.993204	-	-	-	-	-
More active compartments in Tibetan	1	104020000	104040000	-4.48489	-3.90139	-0.583498	0.99604	-	-	-	-	-
More active compartments in Tibetan	1	109080000	109100000	6.11739	6.69248	-0.575092	0.992437	-	-	-	-	-
More active compartments in Tibetan	1	116180000	116200000	0.611225	1.32177	-0.710547	0.993115	-	-	-	-	-
More active compartments in Tibetan	1	116280000	116300000	1.78852	2.31245	-0.523937	0.998227	ENSSSCG00000004607	PYGO1	22.2485	32.0789	0.409526
More active compartments in Tibetan	1	116900000	116920000	-3.66501	-3.1113	-0.553714	0.997495	-	-	-	-	-
More active compartments in Tibetan	1	117020000	117040000	-4.35171	-3.70814	-0.643573	0.985483	-	-	-	-	-
More active compartments in Tibetan	1	117120000	117140000	-4.23906	-3.72536	-0.513704	0.991583	-	-	-	-	-
More active compartments in Tibetan	1	117600000	117620000	-4.43815	-3.87123	-0.566922	0.998439	-	-	-	-	-
More active compartments in Tibetan	1	118480000	118500000	-4.83732	-4.27275	-0.564566	0.991853	-	-	-	-	-
More active compartments in Tibetan	1	118500000	118520000	-4.81717	-4.29068	-0.52649	0.995662	-	-	-	-	-
More active compartments in Tibetan	1	122340000	122360000	-1.04137	-0.452063	-0.58931	0.99792	-	-	-	-	-
More active compartments in Tibetan	1	133460000	133480000	-2.6187	-2.07966	-0.539048	0.996174	-	-	-	-	-
More active compartments in Tibetan	1	133660000	133680000	-3.64373	-3.12297	-0.520756	0.998875	-	-	-	-	-
More active compartments in Tibetan	1	140180000	140200000	-3.13732	-2.63114	-0.506181	0.98759	-	-	-	-	-
More active compartments in Tibetan	1	140240000	140260000	-4.3872	-3.85198	-0.535219	0.997907	-	-	-	-	-
More active compartments in Tibetan	1	140340000	140360000	-4.52172	-4.00659	-0.51513	0.993767	-	-	-	-	-
More active compartments in Tibetan	1	145600000	145620000	1.25727	1.76758	-0.51031	0.992515	-	-	-	-	-
More active compartments in Tibetan	1	151380000	151400000	-5.02757	-4.26124	-0.766333	0.996477	-	-	-	-	-
More active compartments in Tibetan	1	151480000	151500000	-4.91593	-4.22589	-0.690035	0.993148	-	-	-	-	-
More active compartments in Tibetan	1	151500000	151520000	-4.95042	-4.27176	-0.678669	0.995142	-	-	-	-	-
More active compartments in Tibetan	1	151520000	151540000	-4.93543	-4.30581	-0.629627	0.990747	-	-	-	-	-
More active compartments in Tibetan	1	151540000	151560000	-5.07629	-4.31561	-0.760684	0.99541	-	-	-	-	-
More active compartments in Tibetan	1	151560000	151580000	-5.03993	-4.33417	-0.705767	0.995601	-	-	-	-	-
More active compartments in Tibetan	1	151620000	151640000	-5.47166	-4.58798	-0.883686	0.996701	-	-	-	-	-
More active compartments in Tibetan	1	151660000	151680000	-5.3166	-4.36523	-0.951369	0.997625	-	-	-	-	-
More active compartments in Tibetan	1	151900000	151920000	-5.27069	-4.54415	-0.726539	0.996338	-	-	-	-	-
More active compartments in Tibetan	1	151940000	151960000	-5.21103	-4.30988	-0.901143	0.99196	-	-	-	-	-
More active compartments in Tibetan	1	152000000	152020000	-4.86845	-4.04952	-0.81893	0.994742	-	-	-	-	-
More active compartments in Tibetan	1	152020000	152040000	-5.12295	-4.1406	-0.982347	0.994719	-	-	-	-	-
More active compartments in Tibetan	1	152100000	152120000	-4.59893	-3.72042	-0.878512	0.994033	-	-	-	-	-
More active compartments in Tibetan	1	152120000	152140000	-4.33814	-3.40504	-0.933107	0.986502	-	-	-	-	-
More active compartments in Tibetan	1	155320000	155340000	-3.81016	-3.24878	-0.56138	0.998488	-	-	-	-	-
More active compartments in Tibetan	1	155880000	155900000	-2.82998	-2.30032	-0.529666	0.993706	-	-	-	-	-
More active compartments in Tibetan	1	155960000	155980000	-3.19297	-2.60386	-0.589112	0.99422	-	-	-	-	-
More active compartments in Tibetan	1	156000000	156020000	-3.12142	-2.57	-0.551422	0.994888	-	-	-	-	-
More active compartments in Tibetan	1	156120000	156140000	-2.73951	-2.16461	-0.574901	0.997616	-	-	-	-	-
More active compartments in Tibetan	1	156140000	156160000	-2.91938	-2.36699	-0.552393	0.996791	-	-	-	-	-
More active compartments in Tibetan	1	156900000	156920000	-3.23139	-2.68946	-0.541928	0.995162	-	-	-	-	-
More active compartments in Tibetan	1	156920000	156940000	-3.30527	-2.7197	-0.585566	0.993978	-	-	-	-	-
More active compartments in Tibetan	1	156940000	156960000	-3.38881	-2.77753	-0.611284	0.997645	-	-	-	-	-
More active compartments in Tibetan	1	157000000	157020000	-3.45093	-2.74686	-0.704067	0.997301	-	-	-	-	-
More active compartments in Tibetan	1	157800000	157820000	-2.05328	-1.54221	-0.511075	0.994046	-	-	-	-	-
More active compartments in Tibetan	1	157820000	157840000	-1.16558	-0.619522	-0.546062	0.994923	ENSSSCG00000004888	SERPINB8	2.72317	3.50502	0.437233
More active compartments in Tibetan	1	157840000	157860000	-1.36268	-0.750019	-0.61266	0.996016	-	-	-	-	-
More active compartments in Tibetan	1	157860000	157880000	-1.7312	-1.12013	-0.611067	0.992981	ENSSSCG00000004889	SERPINB10	0.48112	0.112174	-
More active compartments in Tibetan	1	157880000	157900000	-1.86304	-1.29439	-0.568643	0.996877	ENSSSCG00000004890	SERPINB2	0.0397443	0.0397443	-
More active compartments in Tibetan	1	157900000	157920000	-2.27043	-1.76036	-0.510075	0.995927	-	-	-	-	-
More active compartments in Tibetan	1	191320000	191340000	1.39902	2.06525	-0.666231	0.990966	ENSSSCG00000005105;ENSSSCG00000037343	MRPL46;MRPS11	76.6815820089882;143.24376343556	86.0144001202618;144.715009415191	0.471318228055997;0.497445387815301
More active compartments in Tibetan	1	191380000	191400000	-1.05061	-0.425426	-0.625186	0.997751	ENSSSCG00000048650	Unknown	-	-	-
More active compartments in Tibetan	1	191400000	191420000	-1.03312	-0.385424	-0.6477	0.995239	-	-	-	-	-
More active compartments in Tibetan	1	191420000	191440000	-1.33388	-0.403258	-0.930622	0.986221	-	-	-	-	-
More active compartments in Tibetan	1	191440000	191460000	-1.47106	-0.827991	-0.643066	0.990425	-	-	-	-	-
More active compartments in Tibetan	1	191480000	191500000	-1.3946	-0.823607	-0.570993	0.993339	-	-	-	-	-
More active compartments in Tibetan	1	191500000	191520000	-1.22397	-0.564566	-0.659407	0.993527	-	-	-	-	-
More active compartments in Tibetan	1	195120000	195140000	-4.00501	-3.38512	-0.619889	0.990997	-	-	-	-	-
More active compartments in Tibetan	1	195320000	195340000	-4.35998	-3.68942	-0.670555	0.994222	-	-	-	-	-
More active compartments in Tibetan	1	195400000	195420000	-4.63399	-3.99176	-0.642229	0.995507	-	-	-	-	-
More active compartments in Tibetan	1	195420000	195440000	-4.79108	-4.12073	-0.670357	0.995078	-	-	-	-	-
More active compartments in Tibetan	1	195540000	195560000	-4.90465	-4.14018	-0.764469	0.98953	-	-	-	-	-
More active compartments in Tibetan	1	195580000	195600000	-4.89141	-4.13721	-0.754196	0.996517	-	-	-	-	-
More active compartments in Tibetan	1	195660000	195680000	-4.9044	-4.23385	-0.670557	0.999038	-	-	-	-	-
More active compartments in Tibetan	1	195720000	195740000	-4.67329	-3.89895	-0.774336	0.996939	-	-	-	-	-
More active compartments in Tibetan	1	195760000	195780000	-3.95752	-3.33751	-0.620014	0.991288	-	-	-	-	-
More active compartments in Tibetan	1	195920000	195940000	-3.32005	-2.72175	-0.598302	0.997245	-	-	-	-	-
More active compartments in Tibetan	1	196000000	196020000	-2.40171	-1.74806	-0.653642	0.996084	-	-	-	-	-
More active compartments in Tibetan	1	196020000	196040000	-2.15983	-1.58207	-0.57776	0.994088	-	-	-	-	-
More active compartments in Tibetan	1	199580000	199600000	-5.16311	-3.96255	-1.20056	0.996921	-	-	-	-	-
More active compartments in Tibetan	1	199820000	199840000	-5.9795	-4.86016	-1.11934	0.99865	-	-	-	-	-
More active compartments in Tibetan	1	199960000	199980000	-6.0056	-4.86522	-1.14038	0.998376	-	-	-	-	-
More active compartments in Tibetan	1	200320000	200340000	-5.96559	-4.42882	-1.53677	0.997251	-	-	-	-	-
More active compartments in Tibetan	1	200340000	200360000	-5.99126	-4.67366	-1.3176	0.997413	-	-	-	-	-
More active compartments in Tibetan	1	200480000	200500000	-6.15483	-4.28493	-1.8699	0.997327	-	-	-	-	-
More active compartments in Tibetan	1	212960000	212980000	-2.40824	-1.88408	-0.52416	0.991962	-	-	-	-	-
More active compartments in Tibetan	1	213140000	213160000	-1.59639	-1.05753	-0.538867	0.993108	-	-	-	-	-
More active compartments in Tibetan	1	217820000	217840000	-2.55876	-2.03754	-0.521214	0.994456	-	-	-	-	-
More active compartments in Tibetan	1	218660000	218680000	-1.319	-0.765145	-0.553859	0.990947	ENSSSCG00000039823	Unknown	0.298863	0.298863	-
More active compartments in Tibetan	1	221020000	221040000	2.87837	3.45218	-0.573816	0.987562	-	-	-	-	-
More active compartments in Tibetan	1	221240000	221260000	2.26574	2.79404	-0.528298	0.993384	-	-	-	-	-
More active compartments in Tibetan	1	231000000	231020000	-2.07182	-1.54829	-0.523523	0.997389	-	-	-	-	-
More active compartments in Tibetan	1	245940000	245960000	-4.93891	-4.40991	-0.529006	0.99252	ENSSSCG00000005413;ENSSSCG00000050029	Unknown;OR13F1	0;0.0840668610763333	0;0.0840668610763333	-;-
More active compartments in Tibetan	1	245980000	246000000	-4.5793	-3.89881	-0.680481	0.99232	ENSSSCG00000051550	OR13C9	0.122893	0.122893	-
More active compartments in Tibetan	1	247000000	247020000	2.63559	3.14982	-0.514237	0.997913	-	-	-	-	-
More active compartments in Tibetan	1	247040000	247060000	2.14638	2.66452	-0.518135	0.994531	-	-	-	-	-
More active compartments in Tibetan	1	247400000	247420000	0.852648	1.65828	-0.805635	0.99381	-	-	-	-	-
More active compartments in Tibetan	1	247500000	247520000	0.63255	1.20065	-0.568096	0.996514	-	-	-	-	-
More active compartments in Tibetan	1	247660000	247680000	1.55386	2.06498	-0.511119	0.993909	-	-	-	-	-
More active compartments in Tibetan	1	247940000	247960000	2.56329	3.14014	-0.576846	0.991436	-	-	-	-	-
More active compartments in Tibetan	1	247980000	248000000	2.5276	3.05339	-0.525783	0.990654	-	-	-	-	-
More active compartments in Tibetan	1	250200000	250220000	2.68039	3.52653	-0.846143	0.986876	-	-	-	-	-
More active compartments in Tibetan	1	250240000	250260000	2.42259	3.2014	-0.77881	0.98164	-	-	-	-	-
More active compartments in Tibetan	1	250320000	250340000	2.19848	2.85733	-0.658844	0.994898	-	-	-	-	-
More active compartments in Tibetan	1	250360000	250380000	2.32191	3.06326	-0.741346	0.990584	ENSSSCG00000005446	EPB41L4B	2.16043	2.73861	0.44099
More active compartments in Tibetan	1	250380000	250400000	2.08139	3.01019	-0.928795	0.98811	-	-	-	-	-
More active compartments in Tibetan	1	250400000	250420000	2.41877	2.98531	-0.566542	0.989881	-	-	-	-	-
More active compartments in Tibetan	1	250460000	250480000	2.63312	3.23831	-0.605185	0.980534	-	-	-	-	-
More active compartments in Tibetan	1	250480000	250500000	2.82092	3.38132	-0.560397	0.987671	-	-	-	-	-
More active compartments in Tibetan	1	250520000	250540000	2.96267	3.68081	-0.718132	0.991846	-	-	-	-	-
More active compartments in Tibetan	1	250540000	250560000	2.44657	3.02358	-0.577017	0.987493	-	-	-	-	-
More active compartments in Tibetan	1	250560000	250580000	1.53985	2.37318	-0.833324	0.986673	-	-	-	-	-
More active compartments in Tibetan	1	250580000	250600000	1.42661	2.6172	-1.19059	0.980366	ENSSSCG00000005449	PTPN3	4.7215	4.98623	0.486365
More active compartments in Tibetan	1	250600000	250620000	1.30558	1.98694	-0.681359	0.985495	-	-	-	-	-
More active compartments in Tibetan	1	250800000	250820000	1.57085	2.21824	-0.647386	0.990229	-	-	-	-	-
More active compartments in Tibetan	1	250820000	250840000	2.32113	3.05592	-0.734791	0.990294	-	-	-	-	-
More active compartments in Tibetan	1	250840000	250860000	2.45444	3.23602	-0.78158	0.984603	-	-	-	-	-
More active compartments in Tibetan	1	251020000	251040000	3.20823	3.81924	-0.611006	0.983219	-	-	-	-	-
More active compartments in Tibetan	1	251040000	251060000	3.42738	3.9938	-0.566416	0.986381	-	-	-	-	-
More active compartments in Tibetan	1	251060000	251080000	3.48344	4.01134	-0.527901	0.984636	-	-	-	-	-
More active compartments in Tibetan	1	252100000	252120000	1.76734	2.30465	-0.537315	0.983305	-	-	-	-	-
More active compartments in Tibetan	1	252400000	252420000	3.95231	4.47984	-0.52753	0.983094	-	-	-	-	-
More active compartments in Tibetan	1	258140000	258160000	-4.77095	-4.1425	-0.628447	0.988988	-	-	-	-	-
More active compartments in Tibetan	1	258240000	258260000	-5.19655	-4.69586	-0.50069	0.990957	-	-	-	-	-
More active compartments in Tibetan	1	258300000	258320000	-5.36073	-4.82589	-0.534842	0.991236	-	-	-	-	-
More active compartments in Tibetan	1	258440000	258460000	-5.44524	-4.87107	-0.574163	0.991145	-	-	-	-	-
More active compartments in Tibetan	1	259260000	259280000	-5.39761	-4.80241	-0.595205	0.991051	-	-	-	-	-
More active compartments in Tibetan	1	261820000	261840000	5.62685	6.23324	-0.606394	0.995459	-	-	-	-	-
More active compartments in Tibetan	1	262020000	262040000	3.1181	3.62042	-0.502326	0.982929	-	-	-	-	-
More active compartments in Tibetan	1	262060000	262080000	3.96761	4.52906	-0.561452	0.986233	-	-	-	-	-
More active compartments in Tibetan	1	262140000	262160000	3.15375	3.66064	-0.506888	0.995938	-	-	-	-	-
More active compartments in Tibetan	1	273660000	273680000	4.19253	4.78365	-0.591114	0.983166	-	-	-	-	-
More active compartments in Tibetan	2	13700000	13720000	-4.82006	-3.72359	-1.09647	0.997651	-	-	-	-	-
More active compartments in Tibetan	2	13780000	13800000	-5.85519	-4.43262	-1.42256	0.995678	-	-	-	-	-
More active compartments in Tibetan	2	13860000	13880000	-5.15264	-4.31444	-0.838209	0.998919	ENSSSCG00000013194;ENSSSCG00000013195	OR5AK2;Unknown	0.06955930709225;0	0.06955930709225;0	-;-
More active compartments in Tibetan	2	14320000	14340000	-11.2618	-9.01592	-2.24592	0.998563	-	-	-	-	-
More active compartments in Tibetan	2	27200000	27220000	2.55605	3.21527	-0.659222	0.987013	ENSSSCG00000013310	C11ORF91	0.225492	0.225492	-
More active compartments in Tibetan	2	27220000	27240000	1.87402	2.63385	-0.759834	0.980302	-	-	-	-	-
More active compartments in Tibetan	2	27240000	27260000	1.60678	2.13453	-0.527748	0.981425	-	-	-	-	-
More active compartments in Tibetan	2	31500000	31520000	-5.27947	-4.7378	-0.541675	0.988839	-	-	-	-	-
More active compartments in Tibetan	2	36300000	36320000	-4.58051	-4.07833	-0.502177	0.9984	ENSSSCG00000048778	L1TD1	0.223509	0.223509	-
More active compartments in Tibetan	2	36480000	36500000	-4.52351	-3.90151	-0.621994	0.991224	-	-	-	-	-
More active compartments in Tibetan	2	36560000	36580000	-4.1308	-3.5405	-0.590304	0.994947	-	-	-	-	-
More active compartments in Tibetan	2	44260000	44280000	-3.68338	-3.16232	-0.521058	0.996733	-	-	-	-	-
More active compartments in Tibetan	2	50560000	50580000	-5.24635	-3.77677	-1.46957	0.999838	-	-	-	-	-
More active compartments in Tibetan	2	50600000	50620000	-3.15768	-2.00517	-1.1525	0.999762	-	-	-	-	-
More active compartments in Tibetan	2	50760000	50780000	-1.84792	-1.03067	-0.817257	0.997538	-	-	-	-	-
More active compartments in Tibetan	2	54500000	54520000	-5.21469	-4.68189	-0.532801	0.99593	ENSSSCG00000039363	OR2T11	0	0	-
More active compartments in Tibetan	2	67740000	67760000	-7.29707	-5.68829	-1.60878	0.998419	ENSSSCG00000041949	DAPL1	-	-	-
More active compartments in Tibetan	2	67760000	67780000	-7.53464	-5.86589	-1.66875	0.999113	ENSSSCG00000033487	DAPL1	0	0	-
More active compartments in Tibetan	2	72260000	72280000	-3.39852	-2.13269	-1.26583	1	-	-	-	-	-
More active compartments in Tibetan	2	115680000	115700000	-4.10395	-3.54449	-0.559461	0.995189	-	-	-	-	-
More active compartments in Tibetan	2	118920000	118940000	-3.84177	-3.33016	-0.511613	0.996242	-	-	-	-	-
More active compartments in Tibetan	2	131720000	131740000	-2.94381	-2.40356	-0.540249	0.991641	-	-	-	-	-
More active compartments in Tibetan	2	131920000	131940000	-3.51652	-2.95039	-0.566128	0.986348	-	-	-	-	-
More active compartments in Tibetan	2	131960000	131980000	-3.78602	-3.13891	-0.647105	0.987555	-	-	-	-	-
More active compartments in Tibetan	2	131980000	132000000	-3.74715	-3.15894	-0.588206	0.988689	-	-	-	-	-
More active compartments in Tibetan	2	132020000	132040000	-3.88554	-3.15777	-0.727772	0.98652	-	-	-	-	-
More active compartments in Tibetan	2	132080000	132100000	-3.47047	-2.75575	-0.714723	0.988937	-	-	-	-	-
More active compartments in Tibetan	2	132100000	132120000	-3.5285	-2.86111	-0.667392	0.99251	-	-	-	-	-
More active compartments in Tibetan	2	132140000	132160000	-3.14894	-2.41044	-0.738497	0.989708	ENSSSCG00000014259	ADAMTS19	6.22799	6.53467	0.487985
More active compartments in Tibetan	2	132160000	132180000	-3.28543	-2.46593	-0.819504	0.983671	-	-	-	-	-
More active compartments in Tibetan	2	132180000	132200000	-3.4811	-2.57373	-0.907369	0.989325	-	-	-	-	-
More active compartments in Tibetan	2	132220000	132240000	-3.75468	-2.9212	-0.833478	0.989144	-	-	-	-	-
More active compartments in Tibetan	2	132240000	132260000	-3.70806	-3.03547	-0.672594	0.986048	-	-	-	-	-
More active compartments in Tibetan	2	132260000	132280000	-3.74284	-3.02375	-0.719087	0.986614	-	-	-	-	-
More active compartments in Tibetan	2	132320000	132340000	-3.47528	-2.88354	-0.591738	0.987896	-	-	-	-	-
More active compartments in Tibetan	2	132340000	132360000	-3.73983	-2.83652	-0.903308	0.987194	-	-	-	-	-
More active compartments in Tibetan	2	132520000	132540000	-2.40761	-1.90755	-0.500066	0.992523	ENSSSCG00000035069	CHSY3	2.283	2.88121	0.442081
More active compartments in Tibetan	2	139400000	139420000	-3.78039	-3.03472	-0.745666	0.990204	-	-	-	-	-
More active compartments in Tibetan	2	139880000	139900000	1.75234	2.32469	-0.57235	0.995728	-	-	-	-	-
More active compartments in Tibetan	2	142520000	142540000	-7.66142	-7.06947	-0.591951	0.991544	ENSSSCG00000024998;ENSSSCG00000037515;ENSSSCG00000046296;ENSSSCG00000049531	PCDHA11;Unknown;Unknown;Unknown	0.0227574150975;0;0;0	0.0227574150975;0;0;0	-;-;-;-
More active compartments in Tibetan	3	1320000	1340000	3.28013	3.90616	-0.626037	0.995803	-	-	-	-	-
More active compartments in Tibetan	3	6820000	6840000	-4.31673	-3.61181	-0.704928	0.982282	-	-	-	-	-
More active compartments in Tibetan	3	25360000	25380000	-2.31122	-1.67728	-0.633937	0.993572	-	-	-	-	-
More active compartments in Tibetan	3	25960000	25980000	1.50621	2.02897	-0.522755	0.984509	-	-	-	-	-
More active compartments in Tibetan	3	26520000	26540000	0.88201	1.39032	-0.508311	0.993041	-	-	-	-	-
More active compartments in Tibetan	3	27360000	27380000	0.869016	1.47099	-0.601969	0.989262	-	-	-	-	-
More active compartments in Tibetan	3	27380000	27400000	0.603768	1.22782	-0.62405	0.993732	-	-	-	-	-
More active compartments in Tibetan	3	27420000	27440000	0.34962	0.98924	-0.639621	0.992403	-	-	-	-	-
More active compartments in Tibetan	3	41680000	41700000	-5.66748	-4.64418	-1.02329	1	-	-	-	-	-
More active compartments in Tibetan	3	51340000	51360000	-2.96578	-2.46436	-0.501415	0.993263	-	-	-	-	-
More active compartments in Tibetan	3	56000000	56020000	0.7044	1.2306	-0.5262	0.988951	-	-	-	-	-
More active compartments in Tibetan	3	102160000	102180000	1.5345	2.13177	-0.597271	0.995901	-	-	-	-	-
More active compartments in Tibetan	3	103040000	103060000	1.55022	2.07529	-0.525069	0.998089	ENSSSCG00000008496	EIF2AK2	40.6082	36.2724	0.528199
More active compartments in Tibetan	3	107820000	107840000	-5.32736	-4.80787	-0.519492	0.994875	ENSSSCG00000008521	SRD5A2	0.0322947	0.0322947	-
More active compartments in Tibetan	3	108140000	108160000	-3.33111	-2.82748	-0.503627	0.988159	ENSSSCG00000024781	CAPN14	0.013432	0.013432	-
More active compartments in Tibetan	3	108760000	108780000	-1.66358	-1.14197	-0.521603	0.998738	-	-	-	-	-
More active compartments in Tibetan	3	108780000	108800000	-1.87897	-1.06326	-0.815712	0.9991	-	-	-	-	-
More active compartments in Tibetan	3	108800000	108820000	-1.4425	-0.761082	-0.681421	0.997026	-	-	-	-	-
More active compartments in Tibetan	3	109040000	109060000	-1.37891	-0.775411	-0.603498	0.992573	-	-	-	-	-
More active compartments in Tibetan	3	110000000	110020000	-1.23548	-0.705147	-0.530334	0.991205	-	-	-	-	-
More active compartments in Tibetan	3	114800000	114820000	2.60291	3.13751	-0.534595	0.99528	-	-	-	-	-
More active compartments in Tibetan	3	115000000	115020000	0.845645	1.41288	-0.567233	0.988591	-	-	-	-	-
More active compartments in Tibetan	4	2460000	2480000	4.32328	4.84308	-0.519804	0.987931	ENSSSCG00000005930	SLC45A4	1.96755	2.36715	0.453907
More active compartments in Tibetan	4	3380000	3400000	2.02243	2.62671	-0.604286	0.980894	-	-	-	-	-
More active compartments in Tibetan	4	4940000	4960000	-5.79843	-5.09387	-0.704555	0.985747	-	-	-	-	-
More active compartments in Tibetan	4	21860000	21880000	-0.715792	-0.140609	-0.575183	0.988445	-	-	-	-	-
More active compartments in Tibetan	4	32240000	32260000	-1.87994	-1.2482	-0.63174	0.993473	-	-	-	-	-
More active compartments in Tibetan	4	32260000	32280000	-1.91934	-1.28056	-0.638784	0.993944	-	-	-	-	-
More active compartments in Tibetan	4	32280000	32300000	-2.1248	-1.45015	-0.674655	0.98773	-	-	-	-	-
More active compartments in Tibetan	4	32340000	32360000	-1.64373	-1.01159	-0.632139	0.997801	-	-	-	-	-
More active compartments in Tibetan	4	32360000	32380000	-1.54346	-0.996557	-0.546898	0.995659	-	-	-	-	-
More active compartments in Tibetan	4	32380000	32400000	-1.61184	-0.910694	-0.701142	0.996705	-	-	-	-	-
More active compartments in Tibetan	4	32400000	32420000	-1.70801	-0.845136	-0.86287	0.991602	-	-	-	-	-
More active compartments in Tibetan	4	32500000	32520000	-1.11584	-0.60099	-0.514848	0.990676	-	-	-	-	-
More active compartments in Tibetan	4	33620000	33640000	-1.7753	-1.26933	-0.505977	0.987422	-	-	-	-	-
More active compartments in Tibetan	4	33840000	33860000	0.502159	1.11177	-0.609614	0.989256	ENSSSCG00000006052;ENSSSCG00000047822	FZD6;Unknown	10.4254100514231;-	9.54664591020185;-	0.521999841751639;-
More active compartments in Tibetan	4	33860000	33880000	0.489299	1.0513	-0.562006	0.990106	-	-	-	-	-
More active compartments in Tibetan	4	33880000	33900000	0.661509	1.23242	-0.570909	0.982816	-	-	-	-	-
More active compartments in Tibetan	4	33920000	33940000	0.580857	1.2182	-0.637342	0.988592	-	-	-	-	-
More active compartments in Tibetan	4	34000000	34020000	1.56846	2.10627	-0.537806	0.989009	-	-	-	-	-
More active compartments in Tibetan	4	40760000	40780000	-3.14333	-2.62617	-0.517157	0.994018	-	-	-	-	-
More active compartments in Tibetan	4	40800000	40820000	-3.14639	-2.55124	-0.595153	0.995627	-	-	-	-	-
More active compartments in Tibetan	4	40840000	40860000	-2.51331	-1.99157	-0.521743	0.989831	-	-	-	-	-
More active compartments in Tibetan	4	40860000	40880000	-2.56061	-1.9052	-0.655403	0.995386	-	-	-	-	-
More active compartments in Tibetan	4	40880000	40900000	-2.68669	-2.17727	-0.509423	0.995015	-	-	-	-	-
More active compartments in Tibetan	4	40900000	40920000	-3.06817	-2.51445	-0.553721	0.997315	-	-	-	-	-
More active compartments in Tibetan	4	40920000	40940000	-3.13705	-2.53513	-0.601915	0.992853	-	-	-	-	-
More active compartments in Tibetan	4	40940000	40960000	-3.31547	-2.73636	-0.579116	0.996689	-	-	-	-	-
More active compartments in Tibetan	4	40980000	41000000	-3.54392	-2.96709	-0.576832	0.995158	-	-	-	-	-
More active compartments in Tibetan	4	41020000	41040000	-4.14395	-3.57489	-0.569064	0.997113	-	-	-	-	-
More active compartments in Tibetan	4	41040000	41060000	-4.26047	-3.60893	-0.651541	0.991649	-	-	-	-	-
More active compartments in Tibetan	4	41060000	41080000	-4.20177	-3.69888	-0.502894	0.994444	-	-	-	-	-
More active compartments in Tibetan	4	41080000	41100000	-4.38495	-3.54411	-0.84084	0.994955	-	-	-	-	-
More active compartments in Tibetan	4	41120000	41140000	-4.37342	-3.60785	-0.765576	0.998301	-	-	-	-	-
More active compartments in Tibetan	4	41140000	41160000	-4.34529	-3.66333	-0.681959	0.995728	-	-	-	-	-
More active compartments in Tibetan	4	41160000	41180000	-4.02737	-3.4013	-0.62607	0.997001	-	-	-	-	-
More active compartments in Tibetan	4	41200000	41220000	-3.48359	-2.88122	-0.602371	0.993631	-	-	-	-	-
More active compartments in Tibetan	4	41260000	41280000	-3.02629	-2.37725	-0.649043	0.996213	-	-	-	-	-
More active compartments in Tibetan	4	45500000	45520000	-3.27083	-2.61224	-0.658586	0.999106	-	-	-	-	-
More active compartments in Tibetan	4	45540000	45560000	-3.40712	-2.81384	-0.593278	0.997064	-	-	-	-	-
More active compartments in Tibetan	4	45640000	45660000	-3.08075	-2.57383	-0.506919	0.989104	-	-	-	-	-
More active compartments in Tibetan	4	46420000	46440000	-4.06815	-3.27536	-0.792787	0.994522	-	-	-	-	-
More active compartments in Tibetan	4	46440000	46460000	-6.28605	-4.57987	-1.70618	0.996563	-	-	-	-	-
More active compartments in Tibetan	4	48160000	48180000	-4.04705	-3.49352	-0.553537	0.998388	-	-	-	-	-
More active compartments in Tibetan	4	51080000	51100000	-1.53321	-0.956715	-0.576499	0.998352	-	-	-	-	-
More active compartments in Tibetan	4	55080000	55100000	-2.26237	-1.72621	-0.536158	0.993939	ENSSSCG00000040681	FABP4	143.618	174.142	0.45197
More active compartments in Tibetan	4	65480000	65500000	0.897575	1.45485	-0.557271	0.983095	-	-	-	-	-
More active compartments in Tibetan	4	65520000	65540000	0.741844	1.32695	-0.585105	0.984701	-	-	-	-	-
More active compartments in Tibetan	4	86400000	86420000	-2.42117	-1.85311	-0.568059	0.995178	-	-	-	-	-
More active compartments in Tibetan	4	86580000	86600000	-2.68959	-2.15448	-0.535114	0.992632	-	-	-	-	-
More active compartments in Tibetan	4	86640000	86660000	-2.33668	-1.83068	-0.506	0.991685	-	-	-	-	-
More active compartments in Tibetan	4	86680000	86700000	-2.25033	-1.66673	-0.583603	0.993067	-	-	-	-	-
More active compartments in Tibetan	4	86700000	86720000	-2.03377	-1.42037	-0.613398	0.988563	-	-	-	-	-
More active compartments in Tibetan	4	86780000	86800000	-1.67165	-1.16949	-0.502165	0.992056	-	-	-	-	-
More active compartments in Tibetan	4	86840000	86860000	-2.00523	-1.43597	-0.569258	0.990576	-	-	-	-	-
More active compartments in Tibetan	4	86920000	86940000	-1.50291	-0.926712	-0.576202	0.991097	-	-	-	-	-
More active compartments in Tibetan	4	87120000	87140000	-3.06851	-2.50347	-0.565042	0.99593	-	-	-	-	-
More active compartments in Tibetan	4	87460000	87480000	-3.88629	-3.38112	-0.505175	0.98887	-	-	-	-	-
More active compartments in Tibetan	4	87580000	87600000	-3.49626	-2.84725	-0.649009	0.987945	-	-	-	-	-
More active compartments in Tibetan	4	87620000	87640000	-3.55898	-3.02297	-0.536006	0.986805	-	-	-	-	-
More active compartments in Tibetan	4	87640000	87660000	-3.63825	-2.89059	-0.747661	0.98526	-	-	-	-	-
More active compartments in Tibetan	4	87660000	87680000	-3.35908	-2.52921	-0.829864	0.988887	-	-	-	-	-
More active compartments in Tibetan	4	89640000	89660000	-3.32438	-2.7262	-0.598179	0.995942	-	-	-	-	-
More active compartments in Tibetan	4	89760000	89780000	-4.04161	-3.41983	-0.621781	0.997501	-	-	-	-	-
More active compartments in Tibetan	4	96460000	96480000	-6.15536	-4.45288	-1.70248	0.999056	-	-	-	-	-
More active compartments in Tibetan	4	109300000	109320000	-3.9478	-3.24894	-0.698862	0.99316	-	-	-	-	-
More active compartments in Tibetan	4	119460000	119480000	-4.87599	-4.043	-0.832991	0.986148	-	-	-	-	-
More active compartments in Tibetan	4	126480000	126500000	-5.13942	-4.20544	-0.933973	0.991457	-	-	-	-	-
More active compartments in Tibetan	4	129860000	129880000	1.71493	2.31078	-0.595851	0.993516	-	-	-	-	-
More active compartments in Tibetan	5	16920000	16940000	2.16184	2.67688	-0.515039	0.991531	-	-	-	-	-
More active compartments in Tibetan	5	16980000	17000000	2.21736	2.80312	-0.585756	0.992793	-	-	-	-	-
More active compartments in Tibetan	5	24720000	24740000	-4.3876	-3.76519	-0.622408	0.991002	-	-	-	-	-
More active compartments in Tibetan	5	25740000	25760000	-5.22316	-4.6678	-0.555364	0.992808	-	-	-	-	-
More active compartments in Tibetan	5	33280000	33300000	-1.87565	-1.27629	-0.599362	0.989368	-	-	-	-	-
More active compartments in Tibetan	5	45960000	45980000	-2.05992	-1.53974	-0.520179	0.996652	-	-	-	-	-
More active compartments in Tibetan	5	46560000	46580000	-1.12375	-0.513484	-0.610267	0.996851	-	-	-	-	-
More active compartments in Tibetan	5	46600000	46620000	-2.06479	-1.37417	-0.690615	0.996803	-	-	-	-	-
More active compartments in Tibetan	5	46620000	46640000	-2.29646	-1.5569	-0.739564	0.99215	ENSSSCG00000022288	STK38L	11.3729	12.7771	0.470927
More active compartments in Tibetan	5	46640000	46660000	-2.4197	-1.65439	-0.765317	0.994831	-	-	-	-	-
More active compartments in Tibetan	5	46660000	46680000	-2.56557	-1.61697	-0.948594	0.992085	ENSSSCG00000042702	Unknown	-	-	-
More active compartments in Tibetan	5	46680000	46700000	-2.18967	-1.49168	-0.697995	0.995652	-	-	-	-	-
More active compartments in Tibetan	5	46700000	46720000	-1.68931	-1.18792	-0.501388	0.996271	-	-	-	-	-
More active compartments in Tibetan	5	60920000	60940000	-3.03321	-2.48455	-0.548663	0.989984	-	-	-	-	-
More active compartments in Tibetan	5	62120000	62140000	-4.89974	-4.26537	-0.634371	0.995116	-	-	-	-	-
More active compartments in Tibetan	5	62200000	62220000	-4.35549	-3.83467	-0.520816	0.986727	-	-	-	-	-
More active compartments in Tibetan	5	68820000	68840000	4.62359	5.24262	-0.619031	0.996959	ENSSSCG00000000760	LRTM2	0.019719	0.019719	-
More active compartments in Tibetan	5	70240000	70260000	-3.25038	-2.63758	-0.612801	0.987683	-	-	-	-	-
More active compartments in Tibetan	5	79760000	79780000	-2.16415	-1.47936	-0.684793	0.992839	ENSSSCG00000044566	Unknown	2.2304e-08	2.2304e-08	-
More active compartments in Tibetan	5	82360000	82380000	-1.2774	-0.703296	-0.574104	0.991308	ENSSSCG00000000862	GNPTAB	13.0719	16.6602	0.439654
More active compartments in Tibetan	5	83980000	84000000	-3.82166	-3.2617	-0.559964	0.993538	-	-	-	-	-
More active compartments in Tibetan	5	84220000	84240000	-5.38486	-4.87771	-0.507151	0.98713	-	-	-	-	-
More active compartments in Tibetan	5	84500000	84520000	-6.07703	-5.56457	-0.512458	0.987142	-	-	-	-	-
More active compartments in Tibetan	5	84560000	84580000	-6.08508	-5.53225	-0.552831	0.990224	-	-	-	-	-
More active compartments in Tibetan	5	84600000	84620000	-5.86159	-5.21772	-0.643875	0.994775	-	-	-	-	-
More active compartments in Tibetan	5	84620000	84640000	-6.00339	-5.43955	-0.563833	0.993549	-	-	-	-	-
More active compartments in Tibetan	5	84640000	84660000	-5.95829	-5.38503	-0.573261	0.988755	-	-	-	-	-
More active compartments in Tibetan	5	84660000	84680000	-5.82763	-5.21919	-0.608439	0.984017	-	-	-	-	-
More active compartments in Tibetan	5	84760000	84780000	-5.36021	-4.7828	-0.577414	0.989217	-	-	-	-	-
More active compartments in Tibetan	5	84780000	84800000	-5.28985	-4.77518	-0.514674	0.989935	-	-	-	-	-
More active compartments in Tibetan	5	84820000	84840000	-5.14932	-4.52267	-0.626645	0.990865	-	-	-	-	-
More active compartments in Tibetan	5	84840000	84860000	-5.17499	-4.40852	-0.766466	0.994567	-	-	-	-	-
More active compartments in Tibetan	5	84860000	84880000	-4.92846	-4.04847	-0.879992	0.988408	-	-	-	-	-
More active compartments in Tibetan	5	84880000	84900000	-4.64586	-3.6774	-0.96846	0.984949	-	-	-	-	-
More active compartments in Tibetan	5	84900000	84920000	-4.39419	-3.40806	-0.986135	0.984106	ENSSSCG00000050703	Unknown	-	-	-
More active compartments in Tibetan	5	84920000	84940000	-4.47591	-3.57827	-0.897641	0.987425	-	-	-	-	-
More active compartments in Tibetan	5	84940000	84960000	-4.69671	-3.7714	-0.925311	0.989268	-	-	-	-	-
More active compartments in Tibetan	5	84960000	84980000	-4.65114	-3.66224	-0.988893	0.993315	-	-	-	-	-
More active compartments in Tibetan	5	84980000	85000000	-4.51933	-3.70376	-0.81557	0.995639	-	-	-	-	-
More active compartments in Tibetan	5	85000000	85020000	-4.50861	-3.62283	-0.885786	0.990329	-	-	-	-	-
More active compartments in Tibetan	5	85040000	85060000	-4.39092	-3.67285	-0.718067	0.990594	-	-	-	-	-
More active compartments in Tibetan	5	85100000	85120000	-3.65952	-3.04961	-0.60991	0.985413	-	-	-	-	-
More active compartments in Tibetan	5	86800000	86820000	-4.48236	-3.93605	-0.546311	0.985056	ENSSSCG00000050899	Unknown	-	-	-
More active compartments in Tibetan	5	88120000	88140000	1.52907	2.34492	-0.815851	0.986876	-	-	-	-	-
More active compartments in Tibetan	5	88560000	88580000	1.80665	2.42696	-0.620317	0.977463	-	-	-	-	-
More active compartments in Tibetan	5	88780000	88800000	1.60558	2.17033	-0.564745	0.980408	-	-	-	-	-
More active compartments in Tibetan	5	88860000	88880000	1.73925	2.31101	-0.571768	0.98867	-	-	-	-	-
More active compartments in Tibetan	5	89480000	89500000	4.41131	4.99892	-0.587616	0.986676	-	-	-	-	-
More active compartments in Tibetan	5	89820000	89840000	2.69819	3.35058	-0.652395	0.994439	-	-	-	-	-
More active compartments in Tibetan	5	90200000	90220000	2.37944	2.98782	-0.608375	0.990874	-	-	-	-	-
More active compartments in Tibetan	5	90220000	90240000	0.832546	1.43283	-0.600285	0.998414	-	-	-	-	-
More active compartments in Tibetan	5	98540000	98560000	-3.52502	-2.98198	-0.54304	0.989544	-	-	-	-	-
More active compartments in Tibetan	5	100320000	100340000	-3.17769	-2.43013	-0.747561	0.984013	-	-	-	-	-
More active compartments in Tibetan	5	100420000	100440000	-2.25415	-1.61891	-0.635244	0.985159	ENSSSCG00000000939;ENSSSCG00000046153	ACSS3;Unknown	12.7738441885907;-	14.0206681853093;-	0.476733594190482;-
More active compartments in Tibetan	5	103800000	103820000	-1.60432	-0.806981	-0.797334	0.996472	-	-	-	-	-
More active compartments in Tibetan	5	103920000	103940000	-2.24952	-1.54288	-0.70664	0.997371	-	-	-	-	-
More active compartments in Tibetan	5	104120000	104140000	2.33751	3.0159	-0.678394	0.995483	ENSSSCG00000000950	E2F7	1.22901	1.42988	0.462226
More active compartments in Tibetan	5	104140000	104160000	3.36062	4.31566	-0.955043	0.996068	-	-	-	-	-
More active compartments in Tibetan	6	880000	900000	8.18934	8.87246	-0.68312	0.993616	ENSSSCG00000002650;ENSSSCG00000002651	APRT;CDT1	21.9212318572344;1.3776036013498	13.9651941845156;1.1353412082452	0.610850237126745;0.548202887739434
More active compartments in Tibetan	6	13940000	13960000	-3.33083	-2.80239	-0.528444	0.991702	-	-	-	-	-
More active compartments in Tibetan	6	16680000	16700000	-4.36312	-3.80683	-0.556295	0.993206	-	-	-	-	-
More active compartments in Tibetan	6	20980000	21000000	-5.85744	-5.23356	-0.62388	0.988581	-	-	-	-	-
More active compartments in Tibetan	6	29660000	29680000	-2.04306	-1.46703	-0.576031	0.996123	-	-	-	-	-
More active compartments in Tibetan	6	101240000	101260000	-3.21311	-2.63464	-0.578467	0.995132	ENSSSCG00000051713	Unknown	-	-	-
More active compartments in Tibetan	6	101280000	101300000	-3.59466	-3.0809	-0.513753	0.991408	-	-	-	-	-
More active compartments in Tibetan	6	101400000	101420000	-3.56772	-3.02694	-0.540783	0.992617	-	-	-	-	-
More active compartments in Tibetan	6	101580000	101600000	-3.64167	-3.13826	-0.503419	0.992756	-	-	-	-	-
More active compartments in Tibetan	6	101600000	101620000	-3.65262	-3.10214	-0.550478	0.990976	-	-	-	-	-
More active compartments in Tibetan	6	101620000	101640000	-3.68842	-3.05902	-0.629401	0.994644	-	-	-	-	-
More active compartments in Tibetan	6	105320000	105340000	-5.58842	-5.07957	-0.508855	0.995457	-	-	-	-	-
More active compartments in Tibetan	6	107800000	107820000	-2.88962	-2.37091	-0.518701	0.996046	-	-	-	-	-
More active compartments in Tibetan	6	109340000	109360000	-2.85847	-2.34102	-0.517452	0.994995	-	-	-	-	-
More active compartments in Tibetan	6	123800000	123820000	-5.00411	-4.43978	-0.564337	0.993315	-	-	-	-	-
More active compartments in Tibetan	6	128760000	128780000	-3.82944	-3.20929	-0.620154	0.995124	ENSSSCG00000003755	MCOLN2	0.309049	0.721114	0.3
More active compartments in Tibetan	6	149140000	149160000	-2.52255	-1.97721	-0.545336	0.991902	ENSSSCG00000032215	FOXD3	-	-	-
More active compartments in Tibetan	6	152540000	152560000	-6.20306	-5.64697	-0.556093	0.992222	-	-	-	-	-
More active compartments in Tibetan	6	152580000	152600000	-6.38481	-5.726	-0.658809	0.986593	-	-	-	-	-
More active compartments in Tibetan	6	152660000	152680000	-5.60976	-5.04834	-0.561417	0.987712	-	-	-	-	-
More active compartments in Tibetan	6	161040000	161060000	-4.36281	-3.76818	-0.594635	0.992682	-	-	-	-	-
More active compartments in Tibetan	6	163260000	163280000	-5.45747	-4.76122	-0.696251	0.983992	ENSSSCG00000003881	SPATA6	3.70849	2.91003	0.56032
More active compartments in Tibetan	6	163720000	163740000	-2.87601	-2.14742	-0.728592	0.98817	-	-	-	-	-
More active compartments in Tibetan	6	164400000	164420000	-6.68763	-4.0556	-2.63203	0.991753	-	-	-	-	-
More active compartments in Tibetan	6	165040000	165060000	2.80996	3.6137	-0.803745	0.983469	ENSSSCG00000033249	Unknown	0	0	-
More active compartments in Tibetan	6	168220000	168240000	-3.94869	-3.19318	-0.75551	0.996244	-	-	-	-	-
More active compartments in Tibetan	6	168520000	168540000	1.83849	2.34158	-0.503091	0.992284	ENSSSCG00000023920	P3H1	36.4112	37.3121	0.49389
More active compartments in Tibetan	6	169900000	169920000	6.14688	6.7229	-0.576015	0.99382	-	-	-	-	-
More active compartments in Tibetan	7	9300000	9320000	-1.93164	-1.37607	-0.555568	0.974879	-	-	-	-	-
More active compartments in Tibetan	7	9320000	9340000	-2.10154	-1.29663	-0.804914	0.987659	-	-	-	-	-
More active compartments in Tibetan	7	9400000	9420000	-1.94339	-1.04894	-0.894456	0.986012	-	-	-	-	-
More active compartments in Tibetan	7	24340000	24360000	-3.38946	-2.131	-1.25846	0.997595	ENSSSCG00000038570	Unknown	0.0292809	0.0292809	-
More active compartments in Tibetan	7	34860000	34880000	-1.81792	-0.897865	-0.920056	0.990013	-	-	-	-	-
More active compartments in Tibetan	7	34900000	34920000	-1.7845	-0.911089	-0.873413	0.991042	-	-	-	-	-
More active compartments in Tibetan	7	34940000	34960000	-2.0383	-1.24614	-0.792156	0.991609	-	-	-	-	-
More active compartments in Tibetan	7	34960000	34980000	-2.27167	-1.32381	-0.94786	0.990371	-	-	-	-	-
More active compartments in Tibetan	7	35000000	35020000	-2.06875	-1.19951	-0.869241	0.995956	-	-	-	-	-
More active compartments in Tibetan	7	35020000	35040000	-1.84296	-1.13744	-0.705518	0.995703	-	-	-	-	-
More active compartments in Tibetan	7	35100000	35120000	-1.19525	-0.541354	-0.653893	0.992983	-	-	-	-	-
More active compartments in Tibetan	7	35800000	35820000	0.544192	1.21009	-0.665903	0.993008	-	-	-	-	-
More active compartments in Tibetan	7	35820000	35840000	0.672152	1.35749	-0.685336	0.992644	-	-	-	-	-
More active compartments in Tibetan	7	35880000	35900000	0.829281	1.47268	-0.6434	0.989772	-	-	-	-	-
More active compartments in Tibetan	7	43640000	43660000	-3.92156	-3.39985	-0.521709	0.986179	-	-	-	-	-
More active compartments in Tibetan	7	43860000	43880000	-6.34727	-5.81616	-0.53111	0.989594	-	-	-	-	-
More active compartments in Tibetan	7	43940000	43960000	-7.1214	-6.44542	-0.675981	0.989593	-	-	-	-	-
More active compartments in Tibetan	7	43980000	44000000	-7.41727	-6.67462	-0.742648	0.992262	ENSSSCG00000001741	DEFB114	0	0	-
More active compartments in Tibetan	7	44000000	44020000	-7.54952	-6.90578	-0.643734	0.986337	ENSSSCG00000034490	DEFB113	0	0	-
More active compartments in Tibetan	7	44040000	44060000	-7.42844	-6.85409	-0.574356	0.993162	ENSSSCG00000036460	DEFB112	0	0	-
More active compartments in Tibetan	7	86720000	86740000	-4.75787	-4.19823	-0.559645	0.987031	-	-	-	-	-
More active compartments in Tibetan	7	86740000	86760000	-4.32601	-3.74699	-0.579021	0.987012	-	-	-	-	-
More active compartments in Tibetan	7	87420000	87440000	-4.32386	-3.79303	-0.530828	0.990872	-	-	-	-	-
More active compartments in Tibetan	7	103160000	103180000	-5.26469	-4.75598	-0.508712	0.994303	-	-	-	-	-
More active compartments in Tibetan	7	103200000	103220000	-5.39351	-4.88053	-0.512976	0.995202	-	-	-	-	-
More active compartments in Tibetan	7	103220000	103240000	-5.1865	-4.66566	-0.520843	0.99284	-	-	-	-	-
More active compartments in Tibetan	7	103240000	103260000	-5.13785	-4.47232	-0.665534	0.988699	-	-	-	-	-
More active compartments in Tibetan	7	103300000	103320000	-4.79348	-4.1872	-0.606275	0.986941	-	-	-	-	-
More active compartments in Tibetan	7	103320000	103340000	-4.3922	-3.83148	-0.560725	0.99159	ENSSSCG00000040638	DIO2	2.21488	4.25723	0.34222
More active compartments in Tibetan	7	103340000	103360000	-4.75626	-4.00092	-0.755337	0.990459	-	-	-	-	-
More active compartments in Tibetan	7	103360000	103380000	-4.8756	-4.24793	-0.627669	0.989325	-	-	-	-	-
More active compartments in Tibetan	7	103380000	103400000	-4.90799	-4.25496	-0.653033	0.990913	-	-	-	-	-
More active compartments in Tibetan	7	103400000	103420000	-5.05073	-4.43509	-0.615643	0.989566	-	-	-	-	-
More active compartments in Tibetan	7	103420000	103440000	-5.10225	-4.56453	-0.537718	0.989826	-	-	-	-	-
More active compartments in Tibetan	7	103440000	103460000	-5.18509	-4.59704	-0.588046	0.992697	-	-	-	-	-
More active compartments in Tibetan	7	118320000	118340000	-5.5913	-5.01741	-0.573885	0.98759	-	-	-	-	-
More active compartments in Tibetan	8	2200000	2220000	2.48174	3.12868	-0.646943	0.983615	-	-	-	-	-
More active compartments in Tibetan	8	3860000	3880000	3.44738	4.0414	-0.594013	0.999531	-	-	-	-	-
More active compartments in Tibetan	8	8100000	8120000	-5.10143	-4.45606	-0.645369	0.982532	-	-	-	-	-
More active compartments in Tibetan	8	9080000	9100000	0.950614	1.70135	-0.750732	0.995283	-	-	-	-	-
More active compartments in Tibetan	8	9100000	9120000	1.48666	2.0092	-0.522543	0.997628	-	-	-	-	-
More active compartments in Tibetan	8	9380000	9400000	-3.90023	-3.1097	-0.790534	0.986652	-	-	-	-	-
More active compartments in Tibetan	8	9520000	9540000	-4.85683	-4.15912	-0.697715	0.986815	-	-	-	-	-
More active compartments in Tibetan	8	28300000	28320000	-3.04379	-2.48114	-0.562651	0.992602	ENSSSCG00000008769	CD68	0.403653	0	-
More active compartments in Tibetan	8	28340000	28360000	-3.2425	-2.73107	-0.511434	0.993654	-	-	-	-	-
More active compartments in Tibetan	8	28460000	28480000	-3.68606	-3.06362	-0.622447	0.992882	-	-	-	-	-
More active compartments in Tibetan	8	42400000	42420000	-3.17428	-2.42927	-0.745015	0.999656	-	-	-	-	-
More active compartments in Tibetan	8	47760000	47780000	1.89327	2.41451	-0.521236	0.993959	-	-	-	-	-
More active compartments in Tibetan	8	52900000	52920000	-3.86678	-3.32822	-0.53856	0.997615	ENSSSCG00000044531	Unknown	-	-	-
More active compartments in Tibetan	8	54920000	54940000	2.20964	2.72054	-0.510908	0.99905	-	-	-	-	-
More active compartments in Tibetan	8	55100000	55120000	0.679568	1.3297	-0.650129	0.998737	-	-	-	-	-
More active compartments in Tibetan	8	55340000	55360000	3.59426	4.10965	-0.515386	0.999206	-	-	-	-	-
More active compartments in Tibetan	8	66420000	66440000	-4.27476	-3.48285	-0.791912	0.996791	-	-	-	-	-
More active compartments in Tibetan	8	66440000	66460000	-4.0195	-3.27261	-0.746889	0.99411	-	-	-	-	-
More active compartments in Tibetan	8	66460000	66480000	-4.01374	-2.81301	-1.20072	0.994645	-	-	-	-	-
More active compartments in Tibetan	8	66520000	66540000	-3.76034	-2.93213	-0.828205	0.999313	-	-	-	-	-
More active compartments in Tibetan	8	66560000	66580000	-3.28777	-2.75344	-0.534338	0.998294	-	-	-	-	-
More active compartments in Tibetan	8	111880000	111900000	2.49727	3.0069	-0.509629	0.989671	-	-	-	-	-
More active compartments in Tibetan	8	121060000	121080000	-1.50186	-0.705718	-0.796144	0.986826	-	-	-	-	-
More active compartments in Tibetan	8	122220000	122240000	-3.27842	-2.63638	-0.642039	0.980182	-	-	-	-	-
More active compartments in Tibetan	8	122280000	122300000	-3.58729	-3.01108	-0.57621	0.982329	-	-	-	-	-
More active compartments in Tibetan	8	122720000	122740000	-3.20018	-2.61498	-0.585199	0.981317	-	-	-	-	-
More active compartments in Tibetan	8	122780000	122800000	-3.50314	-2.83333	-0.669808	0.986258	-	-	-	-	-
More active compartments in Tibetan	8	122900000	122920000	-3.17613	-2.45007	-0.726059	0.984869	-	-	-	-	-
More active compartments in Tibetan	8	122920000	122940000	-3.20574	-2.63131	-0.574427	0.984271	-	-	-	-	-
More active compartments in Tibetan	8	122940000	122960000	-3.38195	-2.54177	-0.840179	0.988194	-	-	-	-	-
More active compartments in Tibetan	8	122960000	122980000	-3.42277	-2.78399	-0.638789	0.991584	-	-	-	-	-
More active compartments in Tibetan	8	122980000	123000000	-3.66913	-3.03837	-0.630756	0.983312	-	-	-	-	-
More active compartments in Tibetan	8	123040000	123060000	-3.7979	-3.00911	-0.78879	0.988818	-	-	-	-	-
More active compartments in Tibetan	8	123180000	123200000	-3.4555	-2.66623	-0.789268	0.986266	-	-	-	-	-
More active compartments in Tibetan	8	123300000	123320000	-3.61514	-2.95628	-0.65886	0.990814	-	-	-	-	-
More active compartments in Tibetan	8	129140000	129160000	-3.09193	-2.51724	-0.574689	0.981075	-	-	-	-	-
More active compartments in Tibetan	9	2320000	2340000	1.18983	1.82723	-0.637392	0.983045	-	-	-	-	-
More active compartments in Tibetan	9	2340000	2360000	1.22251	1.96955	-0.747041	0.991748	ENSSSCG00000042696	Unknown	0	0	-
More active compartments in Tibetan	9	34140000	34160000	-1.78428	-1.15764	-0.626644	0.994912	-	-	-	-	-
More active compartments in Tibetan	9	34920000	34940000	-1.50242	-0.984897	-0.517521	0.988101	-	-	-	-	-
More active compartments in Tibetan	9	37680000	37700000	-2.76124	-2.09237	-0.668874	0.988156	-	-	-	-	-
More active compartments in Tibetan	9	37780000	37800000	-2.72956	-2.06742	-0.662138	0.996535	-	-	-	-	-
More active compartments in Tibetan	9	37860000	37880000	-2.98209	-2.25893	-0.723164	0.989969	-	-	-	-	-
More active compartments in Tibetan	9	37900000	37920000	-2.96249	-2.29338	-0.669114	0.991695	-	-	-	-	-
More active compartments in Tibetan	9	37940000	37960000	-2.5927	-1.98836	-0.604341	0.986311	-	-	-	-	-
More active compartments in Tibetan	9	37960000	37980000	-2.06086	-1.48154	-0.57932	0.990916	-	-	-	-	-
More active compartments in Tibetan	9	42940000	42960000	0.838672	1.41215	-0.573483	0.993661	-	-	-	-	-
More active compartments in Tibetan	9	43120000	43140000	1.4054	1.91776	-0.512352	0.9912	-	-	-	-	-
More active compartments in Tibetan	9	43200000	43220000	1.645	2.42619	-0.781193	0.98916	-	-	-	-	-
More active compartments in Tibetan	9	43260000	43280000	1.27849	1.93968	-0.661189	0.989619	-	-	-	-	-
[truncated: 454 more rows]

## Sheet: Sheet 4 (Brain)
Differential compartments between breeds	Chromosome	Start	End	Mean A-B index of Berkshire	Mean A-B index of Tibetan	ΔA-B index (Berkshire – Tibetan)	Identity score	Gene Ensembl ID	Gene symbol	Berkshire TPM	Tibetan TPM	Allelic expression ratio of Berkshire
[truncated: 1,600 more rows]

[truncated: 1 more sheets: ReadMe]
