# Supplementary material for: Haplotype-resolved 3D chromatin architecture of the hybrid pig
Source: HighWire-hosted journal article supplement (doi:10.1101/gr.278101.123), 2024-02-01
Supplement: Supplemental_Table_S4.xlsx [file Supplemental_Table_S4.xlsx]

## Sheet: Sheet 1 (liver vs. muscle)
Shifted TAD boundaries between liver and muscle	Chromosome	Start	End	ΔLBS (liver – muscle)	P-value of LBS	A-B index of each TAD boundary bin in liver	A-B index of each TAD boundary bin in muscle	|ΔA-B index| (liver – muscle)	Gene Ensembl ID	Gene symbol	TPM in liver	TPM in muscle	|log2FC of expression|	P-value of expression
Liver-restricted TAD boundary	1	43360000	43540000	0.270846	0.000141687	1.1;1.11;0.96;0.82;0.77;0.72;0.58;1.39;0.56	4.37;4.26;4.02;3.28;3.56;3.62;3.29;4.49;3.1	3.26;3.14;3.05;2.46;2.78;2.9;2.7;3.09;2.53	ENSSSCG00000004249	CEP85L	6.41	62.84	2.85	1.51949e-87
Liver-restricted TAD boundary	1	69280000	69460000	0.310208	0.000209869	-1.09;-1.06;-1.01;-1.01;-2.99;-3;-1.01;-2.95;-1.14	-0.01;-0.25;-0.4;-0.42;-0.7;0.96;-0.53;-0.4;-0.33	0.92;1.18;1.39;1.4;1.7;2.04;1.51;1.44;1.19	-	-	-	-	-	-
Liver-restricted TAD boundary	1	73780000	73920000	0.271872	0.000496848	2.71;2.78;2.82;2.88;2.91;2.88;2.42	2.58;2.84;2.98;2.64;2.48;2.31;2.05	0.13;0.05;0.16;0.23;0.42;0.56;0.37	ENSSSCG00000048970	Unknown	0.08	0.08	-	-
Liver-restricted TAD boundary	1	79160000	79340000	0.239886	3.4893e-05	0.69;0.52;0.21;0.06;0.22;0.35;0.54;0.82;0.43	1.59;1.55;1.51;1.84;1.67;1.8;1.66;1.58;1.66	2.29;2.07;1.73;1.91;1.45;1.45;1.11;2.41;1.23	ENSSSCG00000043946	Unknown	0.51	0.78	0.24	0.610406
Liver-restricted TAD boundary	1	80860000	81040000	0.204876	1.04724e-05	-1.16;-1.17;-1.23;-1.11;-1.09;-1.04;-1.31;-1.07;-1.23	-1.82;-1.96;-1.81;-0.03;-1.98;-0.1;-0.13;-1.83;-0.24	0.66;0.78;0.58;0.92;0.89;1.05;0.82;0.75;1	-	-	-	-	-	-
Liver-restricted TAD boundary	1	84980000	85160000	0.208479	0.000209316	0.71;0.71;0.87;-0.97;-0.77;-0.71;-0.49;-0.49;-0.87	-1.81;-1.91;-1.94;-1.97;-1.95;-0.08;-1.93;-1.84;-1.81	1.47;1.38;1.18;0.99;0.81;0.63;0.55;0.65;1.06	-	-	-	-	-	-
Liver-restricted TAD boundary	1	94660000	94840000	0.277647	2.94987e-05	-0.84;-0.57;-0.42;-0.16;-0.16;-1.91;-1.88;-1.78;-1.97	1.18;0.73;0.73;0.74;0.54;0.66;0.39;0.18;0.69	2.34;2.16;2.32;2.58;2.39;2.76;2.51;2.41;2.72	ENSSSCG00000050379	Unknown	0.1	0.3	-	-
Liver-restricted TAD boundary	1	161500000	161640000	0.205071	0.000175016	0.44;0.84;1.1;1.5;1.93;2.16;2.4	1.34;1.86;2.44;2.82;3.03;2.94;3.37	0.9;1.02;1.33;1.32;1.1;0.78;0.97	ENSSSCG00000004908;ENSSSCG00000004909	LMAN1;CPLX4	403.76;15.44	122.47;3.34	1.79;2.4	2.81033819108227e-24;0.00447377397579478
Liver-restricted TAD boundary	1	177160000	177300000	0.285825	0.000122457	-2.84;-1.01;-1.18;-1.12;-1.06;-1.04;-2.96	-1.09;-1.2;-1.62;-0.25;-0.11;-1.99;-1.3	0.25;0.19;0.43;1.13;1.05;0.95;0.33	-	-	-	-	-	-
Liver-restricted TAD boundary	1	222500000	222800000	0.319105	1.70707e-05	2.19;2.35;1.95;1.34;1.11;0.82;0.83;0.6;0.44;0.27;0.18;0;0.12;1.51;0.42	1.22;1.66;1.64;1.21;1.51;1.56;1.67;2.03;2;1.13;0.66;0.5;0.07;1.25;2.2	0.96;0.68;0.3;0.12;0.39;0.73;0.84;1.43;1.55;0.86;0.47;0.5;0.19;0.26;1.77	ENSSSCG00000005249	FAM189A2	2.53	44.14	3.91	1.77676e-120
Liver-restricted TAD boundary	1	236780000	236920000	0.27226	0.00042189	3.37;3.41;3.71;3.67;3.91;4.23;3.67	3.73;3.81;4.3;3.94;4.18;4.53;4.04	0.35;0.4;0.58;0.26;0.26;0.3;0.36	ENSSSCG00000005338;ENSSSCG00000031236	RECK;GLIPR2	10.71;12.31	23.09;54.4	0.91;0.03	0.000780475663054745;3.81922500314519e-09
Liver-restricted TAD boundary	1	242660000	242820000	0.204364	0.000234325	-1.12;-1.32;-1.32;-1.43;-0.09;-1.85;-1.73;-1.57	-0.9;0.89;-0.78;-0.62;-0.71;-0.57;-0.48;-0.52	1.78;1.78;1.45;1.18;0.62;0.71;0.75;0.94	ENSSSCG00000005393	PLPPR1	3.27	2.55	0.72	0.0103594
Liver-restricted TAD boundary	1	242820000	242960000	0.204364	0.000234325	-1.67;-1.74;-1.83;-0.19;-0.49;0.87;-1.81	-0.41;-0.44;-0.31;-0.2;-0.38;-0.79;-0.76	0.73;0.7;0.47;0;0.11;0.34;0.94	ENSSSCG00000045284	Unknown	1.01	1.36	0.21	0.462861
Liver-restricted TAD boundary	1	257860000	258000000	0.262065	0.000102233	-2.31;-2.32;-2.39;-2.54;-1.03;-1.27;-2.76	-2.37;-2.56;-2.5;-2.7;-2.81;-2.85;-1.02	0.06;0.23;0.1;0.15;0.22;0.42;0.26	-	-	-	-	-	-
Liver-restricted TAD boundary	2	104460000	104640000	0.302179	6.82474e-05	-4.97;-3.04;-3.17;-3.19;-3.24;-3.35;-3.34;-4.94;-3.16	-1.83;-0.08;-0.13;-0.15;-0.25;-0.24;-0.29;-1.77;-0.12	2.86;3.03;2.96;2.95;3.01;2.88;2.95;2.82;2.96	-	-	-	-	-	-
Liver-restricted TAD boundary	2	109380000	109560000	0.222602	0.000756279	-2.13;-2.1;-2.03;-2.01;-2.07;-2.14;-2.09;-3.96;-2.01	-3.22;-3.19;-3.24;-3.12;-3.18;-3.24;-3.25;-3.06;-3.15	0.91;0.9;0.78;0.89;0.88;0.89;0.84;0.89;0.86	-	-	-	-	-	-
Liver-restricted TAD boundary	2	139980000	140120000	0.411551	0.00105584	2.42;2.76;3.24;3.24;3;2.12;3.15	2.91;2.9;3.4;2.81;2.36;2.77;2.34	0.48;0.13;0.15;0.42;0.64;0.65;0.81	ENSSSCG00000023647;ENSSSCG00000029125;ENSSSCG00000040026	WNT8A;FAM13B;JTB	0.06;41.26;0.28	0.06;28.26;2.16	-;0.62;2.81	-;0.00558891565291208;0.000191976814290304
Liver-restricted TAD boundary	2	147220000	147400000	0.536884	0.000420548	-2.06;-3.92;-3.62;-3.74;-3.44;-3.41;-3.26;-3.6;-3.39	0.89;0.61;0.37;0.51;0.49;0.61;1.4;0.74;0.62	3.04;3.46;4;4.77;5.06;5.2;6.14;5.15;5.23	ENSSSCG00000014410;ENSSSCG00000040306	SH3RF2;GRXCR2	0.74;0.01	12.71;2.17	3.82;6.49	3.72220494587584e-23;5.15410611353741e-08
Liver-restricted TAD boundary	2	148620000	148800000	0.28301	0.000384493	-4.12;-4.02;-5.78;-5.52;-5.67;-5.23;-5.07;-5.69;-5.11	-1.85;-0.76;0.76;-0.92;0.73;-0.87;-0.68;-2.91;-0.77	3.73;4.73;5.45;5.39;5.59;5.64;5.6;3.22;5.65	ENSSSCG00000036549	DPYSL3	1.8	43	3.63	2.84832e-32
Liver-restricted TAD boundary	3	6300000	6480000	0.314007	0.000247704	4.12;4.43;4.12;4.38;4.16;3.91;3.64;3.23;3.9	4.53;4.85;4.99;5.14;5.01;4.68;4.18;3.49;4.5	0.4;0.42;0.87;0.75;0.85;0.77;0.53;0.25;0.6	ENSSSCG00000007622;ENSSSCG00000007623;ENSSSCG00000026896;ENSSSCG00000031809;ENSSSCG00000033450;ENSSSCG00000034019;ENSSSCG00000036665	ATP5MF-PTCD1;BUD31;CPSF4;ZKSCAN5;PDAP1;ATP5MF;ZNF394	13;216.06;34.32;7.31;152.18;458.21;24.37	23.33;124.2;30.84;12.46;105.76;833.51;5.06	0.88;0.87;0.13;0.69;0.48;0.77;2.15	0.000770551063012908;4.08260754039483e-07;0.624446708550482;1.80490109443692e-05;0.0105362316658216;1.41861194636785e-05;8.20719838204853e-35
Liver-restricted TAD boundary	3	14000000	14180000	0.200543	0.0011715	0.08;0.01;0;0.07;0.03;0.12;0.21;0.03;0.18	2.09;2.11;2.15;2.46;2.49;2.37;2.34;2.11;2.28	2;2.12;2.14;2.38;2.46;2.49;2.55;2.15;2.47	-	-	-	-	-	-
Liver-restricted TAD boundary	3	35820000	36000000	0.214939	0.000961342	-2.03;-2.04;-3.99;-2.32;-2.48;-2.47;-2.35;-2.2;-2.32	-3.39;-3.29;-3.37;-3.36;-3.75;-3.47;-3.31;-3.33;-3.59	0.63;0.75;0.62;0.96;0.72;0.99;1.03;0.87;0.72	-	-	-	-	-	-
Liver-restricted TAD boundary	3	75620000	75800000	0.341002	0.000151797	-0.25;-1.93;-1.85;-1.56;-1.48;-1.3;-1.21;0.8;-1.39	0.15;0.14;0.21;0.1;0.14;0.19;0.25;0.87;0.23	1.91;2.21;2.37;2.55;2.67;2.9;3.05;1.67;2.84	ENSSSCG00000039161	MEIS1	58.15	24.27	1.37	1.74101e-08
Liver-restricted TAD boundary	4	3720000	3860000	0.275982	0.000347054	0.82;0.66;0.59;0.72;0.78;-0.88;0.79	0.31;0.27;0.46;0.55;1.08;0.87;0.95	1.13;0.94;1.06;1.27;1.86;2;1.75	-	-	-	-	-	-
Liver-restricted TAD boundary	4	11560000	11740000	0.220466	0.000611342	0.39;0.49;0.63;0.67;0.78;0.94;1.05;0.99;0.97	2.78;2.39;2.43;2.62;2.29;2.34;2.22;2.2;2.53	2.39;1.89;1.8;1.94;1.5;1.39;1.17;1.21;1.56	-	-	-	-	-	-
Liver-restricted TAD boundary	4	58400000	58660000	0.328093	4.84522e-05	-3.95;-3.98;-3.98;-2.05;-2.21;-2.17;-2.03;-3.83;-2.17;-2.14;-2.21;-3.97;-2.13	-0.18;-1.9;-1.78;-1.79;-1.9;-0.2;-1.76;-1.48;-1.52;-1.43;-1.58;-1.81;-1.45	2.22;1.91;1.8;1.74;1.68;2.02;1.73;1.65;1.34;1.28;1.37;1.84;1.32	-	-	-	-	-	-
Liver-restricted TAD boundary	4	59840000	59980000	0.260066	0.000222419	-2.73;-2.44;-3.95;-3.78;-3.67;-3.65;-2.15	-1.4;-1.03;-2.62;-2.64;-2.46;-2.58;-2.9	0.67;0.58;0.66;0.85;0.78;0.92;0.75	-	-	-	-	-	-
Liver-restricted TAD boundary	4	63500000	63640000	0.345614	0.000204097	-2.43;-2.68;-2.98;-2.98;-2.91;-2.83;-1.2	-2.22;-2.52;-1.11;-1.79;-0.07;-1.74;-1.88	0.21;0.15;0.12;0.8;1.15;0.91;0.68	-	-	-	-	-	-
Liver-restricted TAD boundary	5	29660000	29800000	0.252187	0.000419491	-0.63;-0.5;-0.31;-0.17;-1.69;-1.63;-1.91	0.2;0.23;0.81;0.56;0.1;0.06;0.16	1.16;1.73;2.51;2.4;2.2;2.3;2.26	ENSSSCG00000026004	MSRB3	16.48	307.67	3.96	4.44212e-58
Liver-restricted TAD boundary	5	55680000	55860000	0.248594	0.000192943	-5;-3.17;-3.26;-3.32;-3.5;-3.52;-3.41;-3.09;-3.54	-5.73;-5.61;-5.63;-5.57;-5.66;-5.69;-5.74;-5.7;-5.57	1.26;1.55;1.62;1.74;1.83;1.83;1.66;1.38;1.97	ENSSSCG00000043124	CETN2	0.22	0	-	-
Liver-restricted TAD boundary	6	5020000	5200000	0.334887	0.000757104	-0.63;-0.66;-0.56;-0.47;-0.37;-0.44;-0.38;-0.35;-0.48	0.51;0.27;0.28;0.45;0.19;0.3;0.45;0.48;0.23	1.89;1.62;1.73;1.99;1.83;1.87;2.08;2.13;1.76	-	-	-	-	-	-
Liver-restricted TAD boundary	6	5760000	5940000	0.334887	0.000757104	-0.4;-0.24;-0.4;-0.13;-0.21;-0.24;-0.17;-0.47;-0.19	1.12;1.43;1.18;0.97;0.73;0.18;0.23;1.08;0.41	2.73;3.19;2.79;2.84;2.52;1.94;2.06;2.61;2.22	ENSSSCG00000002684	CDH13	4.84	197.17	4.76	1.26317e-162
Liver-restricted TAD boundary	6	15280000	15460000	0.221092	0.00112667	-0.04;-1.96;-1.84;-1.81;-1.74;-1.66;-1.82;-1.68;-1.89	-2.2;-2.02;-2.1;-2.23;-3.86;-2.48;-2.25;-2.29;-2.34	1.84;1.93;1.74;1.57;1.88;1.17;1.56;1.39;1.54	ENSSSCG00000002747;ENSSSCG00000045697	PMFBP1;Unknown	0.42;0	0.3;0	-;-	-;-
Liver-restricted TAD boundary	6	20920000	21100000	0.240421	6.67705e-05	-2.1;-2.38;-2.25;-2.21;-2.35;-2.47;-2.46;-2.31;-2.24	-5.93;-4.52;-4.46;-4.17;-4.21;-4.46;-4.47;-4.42;-4.53	2.16;1.85;1.79;2.04;2.13;2;1.99;1.88;1.7	-	-	-	-	-	-
Liver-restricted TAD boundary	6	21600000	21780000	0.240421	6.67705e-05	-3.91;-2.09;-3.98;-3.83;-3.71;-3.87;-3.61;-2.05;-3.82	-4.76;-4.74;-4.84;-3.06;-4.53;-4.61;-4.65;-4.65;-4.7	1.14;1.35;1.13;0.77;1.17;1.25;0.96;1.4;1.12	-	-	-	-	-	-
Liver-restricted TAD boundary	6	25360000	25540000	0.208176	0.000389539	-3.82;-3.71;-3.64;-3.55;-3.55;-3.55;-3.45;-3.47;-3.52	-2.67;-2.33;-2.8;-2.62;-2.36;-2.24;-2.57;-2.77;-2.36	0.85;0.61;1.15;1.06;0.81;0.68;1.11;1.29;0.84	-	-	-	-	-	-
Liver-restricted TAD boundary	6	26520000	26700000	0.208176	0.000389539	-2.19;-2.12;-2.15;-2.09;-2.06;-3.97;-3.98;-4;-2.08	-0.49;-0.7;-0.64;-0.47;-0.25;-1.95;-1.7;-1.89;-0.21	2.3;2.58;2.48;2.37;2.19;1.98;1.71;1.89;2.12	-	-	-	-	-	-
Liver-restricted TAD boundary	6	30920000	31100000	0.21365	0.000659127	0.72;0.68;0.68;0.69;0.63;0.56;0.45;0.78;0.51	0.88;0.62;0.5;0.64;0.56;0.79;0.36;0.7;0.6	1.61;1.31;1.19;1.34;1.2;1.36;0.82;1.49;1.12	ENSSSCG00000002831	IRX3	0.07	8.06	5.33	6.00741e-18
Liver-restricted TAD boundary	6	33100000	33280000	0.303464	8.37211e-05	-0.4;-0.44;-0.52;-0.48;-0.57;-0.48;-0.46;-0.36;-0.46	-3.2;-3.72;-3.52;-3.81;-3.45;-3.35;-3.56;-3.4;-3.73	3.19;2.72;3;2.66;3.12;3.13;2.89;2.95;2.73	-	-	-	-	-	-
Liver-restricted TAD boundary	6	34380000	34560000	0.239585	0.000206399	1.06;1.17;1.38;1.53;2.05;2.1;2.26;2.15;1.84	1.79;1.68;1.83;1.95;2.76;2.83;2.81;2.5;2.63	0.73;0.51;0.45;0.41;0.7;0.73;0.55;0.34;0.78	ENSSSCG00000021644	BRD7	82	89.94	0.08	0.555069
Liver-restricted TAD boundary	6	42740000	42880000	0.224581	0.000314929	2.75;2.88;3.1;3.58;3.61;3.57;3.74	1.22;1.46;1.7;2.76;2.38;2.38;2.5	1.52;1.41;1.39;0.82;1.22;1.19;1.23	ENSSSCG00000025152;ENSSSCG00000040905	CEP89;FAAP24	5.1;11.23	6.18;1.73	0.25;2.8	0.204699004526712;4.28900016138934e-18
Liver-restricted TAD boundary	6	56680000	56860000	0.355274	0.000192431	0.78;0.76;0.57;0.07;0.03;0;0.09;0.35;0.33	-1.28;-1.18;-2.9;-1.01;-1.14;-1.42;-1.73;-1.97;-1.1	3.51;3.58;3.67;2.91;2.82;2.57;2.17;2.39;3.24	ENSSSCG00000040389;ENSSSCG00000042197	Unknown;Unknown	0.02;0	0.01;0	-;-	-;-
Liver-restricted TAD boundary	6	110160000	110340000	0.222851	0.00015837	-3.64;-3.72;-3.61;-3.54;-3.34;-3.17;-3.22;-3.19;-3.7	-0.5;-0.24;-0.24;-0.25;-1.97;-0.02;-0.1;-0.11;-0.3	2.86;2.52;2.62;2.71;2.63;2.85;2.88;2.91;2.6	-	-	-	-	-	-
Liver-restricted TAD boundary	6	115300000	115520000	0.265029	0.00098847	-2.36;-2.69;-2.65;-2.86;-1.11;-1.2;-1.67;-0.24;-0.06;-0.1;-2.65	-4.67;-4.8;-3.1;-3.22;-3.37;-3.34;-3.45;-3.52;-3.41;-3.45;-4.8	1.68;1.88;1.55;1.64;1.74;1.86;2.22;2.71;2.65;2.65;1.85	ENSSSCG00000022739;ENSSSCG00000023686;ENSSSCG00000027160	DSG2;TTR;DSG3	70.37;9632.67;0.16	1.71;4.04;0.1	5.34;11.31;-	4.09211300007979e-95;3.56349835436399e-231;-
Liver-restricted TAD boundary	6	118420000	118600000	0.330842	0.000151231	-4.37;-4.5;-4.54;-4.84;-3.07;-3.06;-3.19;-3.27;-4.68	-0.55;0.87;-0.97;0.88;0.97;0.72;0.77;0.89;-1	4.17;4.62;4.43;4.28;3.96;4.21;4.04;3.84;4.31	-	-	-	-	-	-
Liver-restricted TAD boundary	6	133300000	133480000	0.241634	0.00148706	-2.34;-2.31;-2.28;-2.21;-2.15;-2.04;-4;-2.29;-2.07	-1.12;-1.08;-1.04;-1.05;-1.12;-1.09;-1.17;-2.86;-1.1	0.78;0.76;0.76;0.84;0.96;1.04;1.17;0.57;1.02	-	-	-	-	-	-
Liver-restricted TAD boundary	6	152800000	152940000	0.27627	0.000939532	-0.7;0.75;0.58;0.68;0.61;0.41;0.79	0.1;0.64;0.66;0.45;0.59;0.92;0.62	1.19;1.4;1.24;1.14;1.21;1.34;1.42	ENSSSCG00000043152	Unknown	0.44	2.21	1.96	0.00289372
Liver-restricted TAD boundary	7	38160000	38300000	0.216111	0.00102434	3.43;3.29;3.68;3.69;3.51;3.69;3.66	4.57;4.31;5.09;5.02;4.59;4.74;4.82	1.13;1.01;1.41;1.33;1.07;1.04;1.16	ENSSSCG00000001661;ENSSSCG00000001664;ENSSSCG00000026568;ENSSSCG00000030196	SRF;TTBK1;DNPH1;CUL9	8.16;0.7;148.23;3.39	74.23;0.11;63.01;3.93	2.89;2.9;1.12;0.13	1.38087665183286e-42;1.28665364813568e-11;3.1175967960621e-05;0.680418975971422
Liver-restricted TAD boundary	7	39580000	39740000	0.3727	0.000145199	1.98;2.11;2.22;2.14;1.94;1.98;2.1;2.04	1.64;1.63;1.49;1.49;1.41;1.77;1.79;1.39	0.33;0.48;0.72;0.64;0.53;0.21;0.3;0.64	-	-	-	-	-	-
Liver-restricted TAD boundary	7	68520000	68700000	0.27109	0.000244799	0.25;-0.85;-0.03;-1.44;-2.97;-2.7;-2.55;0.72;-2.49	1.9;1.13;0.44;0.19;0.36;0.76;-0.92;1.58;-0.87	2.15;2.29;2.42;2.75;2.67;2.53;2.36;2.3;2.37	ENSSSCG00000022679	COCH	0.7	1.38	0.65	0.000264233
Liver-restricted TAD boundary	7	73600000	73780000	0.263343	4.9253e-05	-3.87;-3.79;-3.61;-3.29;-3.35;-3.07;-4.93;-4.99;-3.38	-4.51;-4.65;-4.39;-4.18;-4.09;-4.07;-5.76;-5.8;-4.27	1.36;1.14;1.21;1.11;1.26;0.99;1.17;1.19;1.1	-	-	-	-	-	-
Liver-restricted TAD boundary	7	85280000	85540000	0.321615	5.08055e-05	-4.85;-4.9;-3.05;-3.21;-3.25;-3.26;-3.35;-3.57;-3.66;-3.68;-3.78;-3.04;-3.43	-0.89;-0.94;0.76;0.79;0.84;0.67;0.58;0.49;0.38;0.2;0.04;-0.97;0.49	4.03;4.03;4.19;4;3.9;4.07;4.06;3.94;3.95;4.12;4.17;3.93;4.07	-	-	-	-	-	-
Liver-restricted TAD boundary	7	89780000	89920000	0.304984	0.000110907	0.95;0.87;0.8;0.79;0.65;0.93;0.43	-1.35;-1.41;-1.29;-1.54;-1.46;-1.69;-2.84	3.6;3.46;3.52;3.26;3.19;3.24;3.6	-	-	-	-	-	-
Liver-restricted TAD boundary	8	6300000	6440000	0.286613	0.000201965	0.97;1.3;1.35;1.33;1.64;1.88;2.4	0.73;1.34;1.83;2.46;3.07;3.64;6.47	0.23;0.03;0.48;1.13;1.42;1.76;4.06	ENSSSCG00000031700	SLC2A9	0.34	1.07	0.47	0.000300148
Liver-restricted TAD boundary	8	9700000	9880000	0.254119	0.000516935	-1.63;-1.65;-1.9;-1.98;-1.92;-1.88;-1.91;-1.91;-1.77	-4.9;-4.91;-4.79;-4.92;-4.83;-4.86;-4.89;-4.88;-4.66	2.73;2.74;3.1;3.06;3.08;3.02;3.01;3.02;3.1	-	-	-	-	-	-
Liver-restricted TAD boundary	8	65560000	65740000	0.356635	0.000389124	1.53;1.3;1.2;1.32;1.02;0.28;0.11;0.09;0.66	-1.52;-1.5;-1.76;-0.05;-1.91;-2.83;-2.5;-2.49;-1.26	4.02;3.8;3.45;3.28;3.11;3.46;3.61;3.41;3.41	ENSSSCG00000008926;ENSSSCG00000008927;ENSSSCG00000008929;ENSSSCG00000029658	TMPRSS11D;TMPRSS11A;Unknown;Unknown	0.08;0.07;0.01;0.48	0;0.04;0;0	-;-;-;-	-;-;-;-
Liver-restricted TAD boundary	8	69420000	69560000	0.224758	0.000413537	3.57;3.53;3.72;3.52;3.26;2.54;3.65	4.14;3.99;4.8;4.24;3.49;0.93;4.18	0.57;0.46;1.08;0.71;0.22;1.6;0.53	ENSSSCG00000008948;ENSSSCG00000024592	ALB;ANKRD17	266029.66;45.8	22.45;92.73	13.41;0.83	1.36098229264744e-98;6.8644681259276e-06
Liver-restricted TAD boundary	8	100500000	100720000	0.235191	8.20573e-05	0.45;0.51;0.7;0.92;1.06;1.21;1.5;2.01;2.05;0.57;1.96	3.55;3.38;3.17;3.46;3.09;3.2;3.2;3.59;3.29;3.45;3.58	3.09;2.86;2.47;2.53;2.03;1.98;1.7;1.58;1.23;2.88;1.61	ENSSSCG00000050208	Unknown	0.6	1.16	0.8	0.0214396
Liver-restricted TAD boundary	8	104960000	105100000	0.240698	0.000507858	2.15;1.88;1.64;1.4;0.59;0.19;1.96	3.44;2.98;2.8;2.76;1.44;0.78;3.29	1.28;1.09;1.15;1.35;0.84;0.59;1.33	ENSSSCG00000009113	METTL14	39.47	40.79	0.13	0.560098
Liver-restricted TAD boundary	8	109680000	109820000	0.251923	0.00166054	-0.44;-0.82;0.82;0.49;0.29;0.45;-0.59	2.43;2.68;2.98;2.78;3.1;3.2;2.55	3.99;3.86;3.8;3.28;3.4;3.66;3.96	-	-	-	-	-	-
Liver-restricted TAD boundary	8	116480000	116620000	0.269176	0.000247775	1.53;1.58;1.19;0.78;0.18;0.04;1.79	3.66;4.09;3.17;2.95;3.09;2.39;3.97	2.12;2.5;1.97;2.16;2.9;2.43;2.18	ENSSSCG00000009157	TET2	13.15	78.45	1.64	1.81284e-58
Liver-restricted TAD boundary	8	119680000	119820000	0.230728	0.000302406	2.14;1.95;1.88;1.68;1.33;0.93;1.18	2.69;2.51;2.26;2.28;1.94;1.4;1.68	0.55;0.55;0.38;0.6;0.6;0.46;0.49	-	-	-	-	-	-
Liver-restricted TAD boundary	8	138020000	138200000	0.200175	0.00124272	0.68;-0.94;-0.69;-0.6;-0.5;-0.68;-1.91;-1.49;-0.1	0.85;1.04;0.4;0.25;0.23;0.1;0.38;0.79;0.27	1.54;2.11;1.71;1.66;1.73;1.43;1.71;1.72;1.63	ENSSSCG00000049598	Unknown	0.72	1.9	0.76	4.09277e-05
Liver-restricted TAD boundary	8	138540000	138680000	0.200175	0.00124272	0.77;0.21;0.5;1.69;3.64;-0.68;4.6	0.41;1.06;1.38;2.37;3.8;0;3.99	1.18;1.27;0.88;0.67;0.15;1.31;0.6	ENSSSCG00000009259	PAQR3	27.51	8.84	1.62	1.40756e-14
Liver-restricted TAD boundary	9	34660000	34840000	0.265026	0.000101206	-1.09;-2.93;-2.83;-2.77;-2.74;-2.73;-2.8;-2.89;-2.79	0.98;-0.77;-0.81;-0.98;0.94;0.76;0.86;-1;-0.83	1.93;1.84;1.97;2.2;2.32;2.5;2.34;2.1;2.04	-	-	-	-	-	-
Liver-restricted TAD boundary	9	62800000	62980000	0.23732	0.00178491	-5.65;-5.59;-5.54;-5.48;-5.31;-5.26;-5.37;-5.34;-5.4	-4.52;-4.55;-4.65;-4.55;-4.7;-4.93;-4.81;-3.03;-4.83	0.87;0.96;1.11;1.06;1.38;1.66;1.44;1.68;1.42	-	-	-	-	-	-
Liver-restricted TAD boundary	9	75500000	75780000	0.285382	0.000319998	0.4;0.18;0.19;0.02;0.08;0.02;0.01;0.02;0.08;0.32;0.35;0.48;0.02;0.32	-0.31;-0.25;-0.13;-2;-1.9;-1.98;-0.26;-0.46;-0.68;-0.63;-0.75;-0.58;-0.08;-0.7	2.1;1.94;2.07;2.02;2.01;2;1.72;1.51;1.4;1.7;1.61;1.9;1.89;1.63	-	-	-	-	-	-
Liver-restricted TAD boundary	9	83100000	83280000	0.236565	1.84114e-05	-2.97;-1.03;-1.16;-1.3;-1.57;-1.76;-1.93;-0.14;-1.85	-1.89;-1.79;-1.85;-1.78;-1.96;-1.96;-1.98;-0.15;-0.03	0.91;0.76;0.68;0.47;0.38;0.2;0.05;0;0.18	-	-	-	-	-	-
Liver-restricted TAD boundary	9	93280000	93540000	0.252693	0.000118676	1.91;2.37;1.44;1.34;1.93;2.04;1.69;0.65;0.11;0.47;0.49;1.6;1.84	0.08;0.69;0.66;0.35;0.94;1.54;1.38;0.26;-0.99;-0.48;-0.56;1.38;0.43	2;1.67;2.1;1.7;0.99;0.49;0.31;0.38;0.9;1.04;0.94;0.21;2.27	ENSSSCG00000015391;ENSSSCG00000015393;ENSSSCG00000025326	CROT;DMTF1;TMEM243	828.25;23.3;213.33	40.72;30.97;28.94	3.89;0.29;2.89	8.02388316994467e-72;0.0869636944386821;8.09832111869413e-49
Liver-restricted TAD boundary	9	94020000	94200000	0.263747	0.0011341	-2.16;-2.13;-2.15;-2.17;-2.19;-2.07;-3.9;-3.77;-2.29	-4.87;-4.96;-3.04;-3.07;-4.97;-3.08;-3.07;-4.98;-3.12	1.28;1.17;1.11;1.09;1.22;0.98;0.83;0.78;1.16	-	-	-	-	-	-
Liver-restricted TAD boundary	9	96000000	96180000	0.25221	1.08375e-05	-2.8;-2.75;-2.71;-2.64;-2.6;-2.67;-2.77;-1.01;-2.69	0.97;-0.92;-0.89;-0.8;-0.88;0.98;0.57;0.24;-0.92	2.23;2.17;2.18;2.15;2.27;2.34;2.66;2.74;2.22	ENSSSCG00000015398	SEMA3A	10.4	18.61	0.91	0.000780724
Liver-restricted TAD boundary	9	108520000	108660000	0.251526	0.000165831	-1.52;-1.86;-0.33;-0.79;0.48;-1.43;0.5	-1.49;-1.7;-0.21;-0.78;0.07;-1.29;0.19	0.02;0.16;0.11;0.01;0.4;0.14;0.31	ENSSSCG00000024028	STARD3NL	31.67	14.17	1.28	5.09725e-08
Liver-restricted TAD boundary	9	134700000	134880000	0.285397	5.84672e-05	0.65;0.6;0.49;0.68;0.75;0.85;1.23;0.55;1.4	4.39;4.39;5.32;5.5;5.01;4.48;4.73;4.9;4.46	3.74;3.78;4.83;4.82;4.26;3.63;3.49;4.35;3.06	-	-	-	-	-	-
Liver-restricted TAD boundary	10	4680000	4820000	0.247707	0.000279463	-2.35;-2.2;-2.18;-2.03;-2.16;-3.91;-2.31	-1.01;-1.35;-1.59;-1.45;-1.51;-1.4;-1.13	0.65;1.15;1.41;1.42;1.35;1.49;0.82	-	-	-	-	-	-
Liver-restricted TAD boundary	10	12300000	12480000	0.232157	0.00534554	0.64;0.47;0.3;0.13;0.22;0.51;0.28;0.59;0.55	0.84;1.19;1.39;1.58;2.15;2.58;1.72;1.08;2.04	1.48;1.67;1.7;1.72;1.93;2.06;1.43;1.68;1.48	ENSSSCG00000010840;ENSSSCG00000025686;ENSSSCG00000028178	RGS7;KMO;FH	16.65;280.12;312.32	10.36;5.77;297.51	0.75;5.6;0.18	0.000292773990694035;1.79184311640348e-112;0.401075560802625
Liver-restricted TAD boundary	10	51960000	52120000	0.318785	0.000471234	2.02;1.99;2;2.21;2.12;2.1;1.92;2.23	-0.7;-0.97;0.87;-0.6;-0.55;-0.62;-0.59;-0.73	3.33;3.02;2.88;3.61;3.57;3.49;3.34;3.51	ENSSSCG00000011078	ARMC3	1.27	0.02	8.39	1.79854e-10
Liver-restricted TAD boundary	10	60800000	60980000	0.281105	0.000150985	0.4;0.66;0.66;-0.96;-0.95;-0.88;-0.68;-0.46;0.54	0.33;0.49;0.06;0.5;0.43;0.68;-0.56;-0.69;0.85	0.74;1.16;0.59;0.54;0.62;0.43;0.12;0.22;1.39	-	-	-	-	-	-
Liver-restricted TAD boundary	10	61280000	61460000	0.281105	0.000150985	-1.64;-1.46;-1.25;-1.09;-2.96;-2.88;-2.81;-2.73;-1.31	-1.93;-1.67;-1.4;-2.85;-2.8;-2.76;-2.62;-2.65;-1.08	0.28;0.21;0.15;0.23;0.15;0.12;0.18;0.07;0.22	-	-	-	-	-	-
Liver-restricted TAD boundary	11	23720000	23900000	0.358565	0.000201126	0.48;0.41;0.51;0.58;0.52;0.61;0.61;0.58;0.67	3.53;3.74;3.38;3.47;2.97;2.8;2.86;3.82;3.05	3.05;3.33;2.86;2.88;2.45;2.19;2.25;3.24;2.38	-	-	-	-	-	-
Liver-restricted TAD boundary	11	42280000	42460000	0.203395	5.54099e-06	-2.08;-2.3;-2.4;-2.5;-2.61;-2.82;-2.61;-2.62;-2.38	-2.1;-2.42;-2.46;-2.44;-2.6;-2.67;-2.38;-2.6;-2.46	0.01;0.11;0.05;0.06;0;0.15;0.23;0.01;0.07	ENSSSCG00000009456	KLHL1	0.03	0.17	-	-
Liver-restricted TAD boundary	11	43520000	43700000	0.237513	0.000193699	-0.81;-0.79;-0.93;-0.81;-0.91;0.94;-1;0.72;-0.9	-1.44;-1.67;-0.06;-1.46;-1.47;-1.45;-1.39;-1.68;-1.41	1.37;1.11;0.86;1.35;1.43;1.6;1.6;1.59;1.49	-	-	-	-	-	-
Liver-restricted TAD boundary	11	44340000	44480000	0.237513	0.000193699	0.86;0.92;-0.88;-0.68;-0.39;-0.46;-0.48	-2.42;-2.78;-2.53;-2.58;-2.48;-2.55;-2.58	2.71;2.29;2.34;2.09;1.9;1.91;1.89	-	-	-	-	-	-
Liver-restricted TAD boundary	11	61300000	61540000	0.201295	0.00115232	-2.14;-2.13;-3.93;-3.99;-3.98;-2.07;-2.19;-2.62;-2.71;-2.62;-4;-2.37	-4.25;-4.49;-4.19;-4.24;-4.26;-4.22;-4.35;-4.65;-4.66;-4.51;-4.31;-4.37	1.89;1.64;1.74;1.74;1.71;1.84;1.84;1.97;2.04;2.11;1.69;2	-	-	-	-	-	-
Liver-restricted TAD boundary	11	77020000	77160000	0.215487	0.000373539	3.97;3.97;4;4.11;4.51;4.58;4.04	5.53;5.5;4.67;4.99;5.16;5.29;5.4	1.56;1.52;0.66;0.87;0.64;0.71;1.35	-	-	-	-	-	-
Liver-restricted TAD boundary	12	4160000	4300000	0.218223	8.16644e-05	2.28;2.46;2.43;2.81;3.03;3.22;2.43	3.06;3.11;3.08;3.36;3.57;3.9;3.2	0.77;0.64;0.65;0.54;0.53;0.67;0.76	-	-	-	-	-	-
Liver-restricted TAD boundary	12	28040000	28220000	0.232359	0.00160484	-5.94;-5.96;-4.08;-6;-4.09;-4.05;-4.25;-5.94;-5.99	-4.11;-4.1;-4.26;-5.85;-5.94;-4.07;-4.61;-5.97;-4.24	0.16;0.14;0.17;0.15;0.15;0.01;0.36;0.02;0.24	-	-	-	-	-	-
Liver-restricted TAD boundary	12	30480000	30660000	0.224323	0.000239421	-4.87;-4.91;-4.84;-4.73;-4.63;-4.62;-4.74;-4.74;-3.01	-3.61;-3.61;-3.55;-3.62;-3.55;-3.38;-3.47;-3.64;-3.6	0.73;0.7;0.71;0.88;0.91;0.76;0.72;0.9;0.58	-	-	-	-	-	-
Liver-restricted TAD boundary	12	30920000	31100000	0.224323	0.000239421	-4.34;-4.22;-4.2;-4.33;-4.29;-4.26;-4.45;-4.23;-4.34	-5;-4.93;-4.71;-4.7;-4.51;-4.51;-4.62;-3.04;-4.53	0.65;0.7;0.51;0.36;0.22;0.24;0.16;0.8;0.18	-	-	-	-	-	-
Liver-restricted TAD boundary	13	55840000	55980000	0.253182	3.2734e-05	-2.06;-2.04;-2.02;-2.08;-2.08;-2.23;-2.19	-0.25;-0.02;-0.3;-0.34;-0.68;-0.94;-0.87	2.18;1.97;2.27;2.26;2.59;2.71;2.68	-	-	-	-	-	-
Liver-restricted TAD boundary	13	108760000	108900000	0.206069	0.000463451	0.37;1.01;1.26;1.29;1.36;1.4;0.84	1.43;2.43;2.56;2.78;2.89;2.86;1.95	1.05;1.42;1.3;1.48;1.52;1.45;1.11	ENSSSCG00000030467;ENSSSCG00000051128	PHC3;Unknown	49.79;0.46	98.45;1.13	0.95;0.91	1.47406891331605e-09;0.000710372061187155
Liver-restricted TAD boundary	14	10180000	10320000	0.269096	7.0261e-05	1.03;1;0.46;0.57;0.67;0.66;0.77	2.14;2.13;1.33;1.12;0.63;0.89;1.73	1.1;1.13;0.86;0.55;0.03;0.23;0.96	ENSSSCG00000009657;ENSSSCG00000009658	PPP2R2A;BNIP3L	58.84;57.68	67.45;21.79	0.05;1.48	0.823777792497328;3.19928337902661e-06
Liver-restricted TAD boundary	14	61980000	62120000	0.233001	1.38795e-05	-0.29;-0.42;-0.4;-0.01;-1.72;-1.57;-0.34	0.23;0.26;0.29;0.21;0.69;0.87;0.21	1.48;1.84;1.89;1.77;1.58;1.55;1.44	-	-	-	-	-	-
Liver-restricted TAD boundary	14	62160000	62300000	0.233001	1.38795e-05	-1.25;-1.18;-1.12;-1.32;-1.55;-1.81;-1.4	-0.45;-0.12;-0.13;-0.19;-0.43;-0.66;-0.32	1.19;0.94;1.01;0.87;0.88;0.85;0.92	-	-	-	-	-	-
Liver-restricted TAD boundary	14	81980000	82120000	0.243763	6.01152e-05	0.04;0.11;0.02;0.14;0.07;0.01;0.01	0.39;0.54;0.65;-0.97;-0.79;-0.63;0.83	0.44;0.42;0.62;1.17;1.28;1.39;0.82	ENSSSCG00000010334;ENSSSCG00000010336	SFTPD;SFTPA1	1.42;8.54	1.46;3.16	0.16;1.06	0.681504650736258;0.104899027055657
Liver-restricted TAD boundary	14	91320000	91580000	0.210417	0.000249309	-2.55;-2.81;-2.78;-2.8;-2.8;-2.87;-2.86;-1.38;-1.49;-1.68;-1.68;-2.81;-3	-1.49;-1.81;-1.81;-1.96;-1.92;-0.06;-1.83;-0.8;0.85;-0.97;-0.88;-1.8;-0.14	0.94;0.99;1.02;1.16;1.11;1.19;0.96;1.41;1.66;1.29;1.2;0.98;1.14	ENSSSCG00000034973	CXCL12	294.44	116.84	1.2	0.0039701
Liver-restricted TAD boundary	14	108380000	108560000	0.248998	0.000448068	2.87;2.75;2.72;2.45;2.38;2.24;2.15;2.96;2.14	0.97;0.77;1.11;1.37;0.7;0.34;0.21;0.93;0.09	1.9;1.98;1.61;1.07;1.68;1.9;2.37;2.02;2.23	-	-	-	-	-	-
Liver-restricted TAD boundary	14	122000000	122180000	0.203746	0.00102735	-1.57;-1.19;-1.08;-2.92;-2.82;-2.78;-2.8;-1.38;-2.85	-2.16;-2.05;-3.91;-3.93;-3.94;-3.91;-2.13;-2.14;-3.96	1.41;1.14;1.17;0.98;0.88;0.87;0.67;1.23;0.88	-	-	-	-	-	-
Liver-restricted TAD boundary	14	137580000	137760000	0.211479	0.000503311	0.47;0.44;0.45;0.44;0.47;0.46;0.57;0.43;0.62	2.61;2.61;2.79;2.76;2.89;2.41;2.5;2.57;2.52	3.08;3.06;3.24;3.21;3.36;2.88;3.07;3.01;3.15	-	-	-	-	-	-
Liver-restricted TAD boundary	14	138280000	138460000	0.211479	0.000503311	0.18;0.13;0.11;0.19;0.53;0.86;1.33;0.41;0.56	2.64;2.59;2.58;2.77;2.87;2.8;2.94;2.59;2.62	2.82;2.73;2.47;2.57;2.34;1.93;1.61;3;2.06	-	-	-	-	-	-
Liver-restricted TAD boundary	15	25160000	25340000	0.204718	9.4261e-05	3.31;2.72;2.27;1.92;1.55;1.97;2.49;1.73;3.73	4.22;3.82;3.5;3.17;3.45;4.84;5.66;4.47;4.22	0.91;1.1;1.23;1.24;1.89;2.86;3.17;2.73;0.48	ENSSSCG00000015720;ENSSSCG00000015721	BIN1;ERCC3	27.82;13.72	774.22;13.59	3.31;0.03	3.87154996691453e-109;0.876064458175109
Liver-restricted TAD boundary	15	62100000	62240000	0.206612	8.53804e-05	-3.85;-2.21;-2.35;-2.84;-1.14;-1.24;-3.96	-0.35;-0.97;-0.91;-0.7;-0.91;0.59;-0.58	2.49;2.76;2.55;1.86;1.76;2.17;2.62	-	-	-	-	-	-
Liver-restricted TAD boundary	15	69500000	69640000	0.218853	0.00189283	-3.62;-3.6;-3.7;-3.83;-2.54;-2.72;-2.11	-2.8;-2.53;-2.52;-2.28;-2.45;-2.4;-2.41	1.18;0.93;0.82;0.45;0.09;0.32;0.3	ENSSSCG00000015898	KCNH7	0.03	0.47	-	-
Liver-restricted TAD boundary	15	113440000	113580000	0.266495	0.000325737	-0.03;-1.82;-1.47;-2.38;-2.52;-2.6;-2.88	-0.95;-0.78;-0.66;-0.09;-0.12;-0.25;-0.32	0.91;0.96;1.18;1.71;1.59;1.65;1.43	-	-	-	-	-	-
Liver-restricted TAD boundary	15	114560000	114740000	0.266495	0.000325737	-3.64;-3.69;-3.7;-3.81;-3.89;-3.8;-2.26;-2.17;-3.94	-0.61;-0.48;-0.52;-0.68;-0.6;-0.39;-0.48;-0.62;-0.32	2.97;2.78;2.82;2.87;2.71;2.58;2.21;2.44;2.37	ENSSSCG00000016160	ERBB4	0.12	8.31	5.68	1.73046e-35
Liver-restricted TAD boundary	15	116760000	116940000	0.224641	0.00125675	-2.7;-2.87;-1.11;-1.16;-1.23;-1.33;-1.19;-2.67;-1.16	-1.39;-1.62;-0.13;-0.05;-0.13;-0.43;-0.45;-1.55;-0.36	0.68;0.74;1.02;0.88;0.9;1.09;1.25;0.87;1.19	ENSSSCG00000016168	VWC2L	1.28	1.01	0.28	0.316214
Liver-restricted TAD boundary	15	122900000	123080000	0.246705	0.00126888	-1.61;-1.65;-1.77;-1.95;-0.1;-0.28;-0.2;-1.82;-0.36	-0.4;-0.59;-0.96;0.94;-0.98;0.63;0.94;-0.43;0.84	0.79;0.94;1.18;1.1;0.88;1.08;0.85;0.6;0.79	-	-	-	-	-	-
Liver-restricted TAD boundary	16	8540000	8720000	0.205946	6.36147e-05	-2.48;-2.5;-2.58;-2.56;-2.54;-2.7;-2.74;-2.87;-2.61	-2.42;-2.66;-2.56;-2.56;-2.67;-2.55;-2.61;-2.46;-2.58	0.06;0.15;0.01;0;0.12;0.14;0.12;0.4;0.03	ENSSSCG00000026842;ENSSSCG00000050005	CDH18;L1TD1	0.61;0.84	1.35;1.12	0.83;0.11	0.0232323132173334;0.758999030420885
Liver-restricted TAD boundary	16	26100000	26280000	0.217389	0.000860837	0.07;0.3;0.87;-0.73;-0.51;-0.48;-0.36;-0.31;-0.47	-1.86;-1.86;-1.87;-1.88;-1.87;-0.15;-2;-0.24;-1.99	2.22;1.83;1.25;0.84;0.64;0.33;0.36;0.06;0.47	ENSSSCG00000048052	Unknown	0.17	0.06	-	-
Liver-restricted TAD boundary	16	27380000	27560000	0.207848	0.00048773	0.06;0.11;0.3;0.69;0.91;1.26;2.85;0.34;2.12	1.69;1.39;1.35;1.45;1.42;1.44;3.07;2.19;2.07	1.62;1.28;1.05;0.75;0.5;0.18;0.21;1.85;0.04	ENSSSCG00000016867	CCDC152	1.27	0	5.08	0.0491574
Liver-restricted TAD boundary	16	40640000	40780000	0.220855	0.000101899	0.52;0.43;0.18;0.31;0.55;0.65;0.62	-2.64;-2.65;-2.91;-2.79;-2.61;-2.43;-2.25	2.84;2.91;2.9;2.89;2.83;2.91;3.12	ENSSSCG00000046595	Unknown	0.74	0.76	0.16	0.699106
Liver-restricted TAD boundary	16	55360000	55540000	0.22929	0.000254207	1.99;2.13;2.15;1.76;0.94;0.79;0.73;0.73;1.37	2.72;2.84;2.73;1.66;0.44;0.28;0.41;0.46;1.16	0.72;0.7;0.58;0.09;0.49;1.07;1.15;1.2;0.21	ENSSSCG00000017015	RARS1	136.66	177.06	0.21	0.260331
Liver-restricted TAD boundary	16	72780000	72960000	0.210637	0.000445362	-0.92;-0.31;-1.94;-1.59;-1.34;-1.25;-1.1;-2.94;-1.53	0.68;0.65;0.21;0.08;0.31;0.4;0.74;0.78;0.18	1.77;2.34;2.28;2.33;2.35;2.35;2.16;2.27;2.28	-	-	-	-	-	-
Liver-restricted TAD boundary	17	24840000	24980000	0.234443	0.000297107	-3.63;-3.77;-3.96;-2.36;-2.61;-2.81;-2.26	-2.61;-2.73;-2.9;-2.77;-2.89;-1.09;-2.86	0.98;0.96;0.93;0.4;0.27;0.28;0.59	-	-	-	-	-	-
Liver-restricted TAD boundary	17	33220000	33360000	0.227702	4.29962e-06	1.97;2;2.02;1.95;2.16;2.18;1.96	2.2;2.06;2.08;2.22;2.42;2.5;2.39	0.23;0.05;0.05;0.27;0.25;0.32;0.43	ENSSSCG00000026043	TGM3	3.45	0.82	2.06	0.00819281
Liver-restricted TAD boundary	17	42820000	43000000	0.332251	0.000262189	-2.94;-2.99;-1.21;-1.48;-1.61;-1.52;-1.59;-1.14;-1.7	2.04;2;1.71;1.98;1.86;1.95;2.13;2.01;2.09	5.1;5.01;4.5;4.5;4.25;4.44;4.55;4.88;4.39	ENSSSCG00000048705	Unknown	2.18	2.86	0.13	0.665187
Liver-restricted TAD boundary	18	37160000	37340000	0.240442	0.00106607	-0.62;-0.71;-0.59;-0.4;-0.19;-0.12;-0.27;-0.05;-0.47	-0.21;-0.67;-0.42;-0.46;-0.43;-0.22;-0.48;-0.29;-0.44	0.4;0.04;0.17;0.05;0.24;0.09;0.21;0.24;0.03	-	-	-	-	-	-
Liver-restricted TAD boundary	18	50880000	51020000	0.266904	0.000514479	2.19;2.3;2.21;2.43;2.42;2.43;2.38	3.78;3.65;3.91;4;3.65;3.97;3.8	1.58;1.34;1.69;1.57;1.23;1.53;1.41	ENSSSCG00000016750	YKT6	110.99	121.67	0.09	0.668133
Muscle-restricted TAD boundary	1	7340000	7480000	-0.20227	0.0110226	4.99;5.15;4.98;5.58;5.73;5.79;4.37	5.62;5.5;5.29;5.79;5.5;5.8;4.2	0.63;0.35;0.3;0.21;0.23;0.01;0.16	ENSSSCG00000004041;ENSSSCG00000004044	SLC22A1;IGF2R	227.72;25.51	0.15;45.76	10.55;0.74	2.37681346712642e-110;0.00467686889381804
Muscle-restricted TAD boundary	1	19480000	19680000	-0.42852	0.000547083	-2.99;-1.16;-1.7;-0.19;-0.84;0.13;0.4;0.33;-1.5;0.28	-2.57;-2.57;-1.49;-0.11;-0.83;0.7;1.42;1.58;-1.24;2.07	0.42;0.58;0.21;0.08;0.01;0.83;1.02;1.24;0.25;1.78	ENSSSCG00000004119;ENSSSCG00000004120	GRM1;SHPRH	0.04;36.44	0.01;40.58	-;0	-;0.949416094878206
Muscle-restricted TAD boundary	1	43660000	43840000	-0.526642	0.000232367	0.35;0.07;0.2;0.46;-1;-0.59;-0.59;-0.47;-0.86	2.57;1.71;0.93;0.45;0.07;0.57;0.55;0.83;0.31	2.22;1.64;1.13;0.92;0.92;0.84;0.86;0.7;0.82	ENSSSCG00000004250	SLC35F1	0.27	4.4	2.25	8.45592e-24
Muscle-restricted TAD boundary	1	69120000	69260000	-0.310208	0.000209869	-2.94;-2.96;-2.85;-2.98;-1.04;-2.9;-2.97	-1.48;-1.47;-1.41;-1.64;-1.8;-1.81;-1.7	0.54;0.5;0.55;0.65;0.75;0.9;0.72	-	-	-	-	-	-
Muscle-restricted TAD boundary	1	70220000	70400000	-0.347434	0.000509898	-1.62;-1.76;-1.86;-1.86;-1.91;-1.87;-1.55;-1.74;-1.65	-1.35;-1.01;-1.04;-2.94;-2.89;-2.72;-2.58;-2.69;-1.21	0.27;0.75;0.82;0.91;1.02;1.14;0.97;1.05;0.43	-	-	-	-	-	-
Muscle-restricted TAD boundary	1	82140000	82280000	-0.569678	6.63093e-05	0.41;0.62;0.34;0.62;0.58;0.54;0.22	1;0.81;-0.14;-1.19;-2.91;-2.53;0.7	0.59;0.19;1.52;2.18;2.51;2.92;0.93	ENSSSCG00000004445;ENSSSCG00000004446;ENSSSCG00000023415;ENSSSCG00000025656;ENSSSCG00000040660	CALHM4;RWDD1;SULT1A3;SULT1A3;TRAPPC3L	0.06;95.44;2566.46;2.95;0.23	1.11;90.34;1.33;0;1.27	3.18;0.22;11.03;6.8;1.8	0.000160453204354245;0.242369115903105;3.2281447435019e-219;5.8021827933226e-06;0.0489767322102193
Muscle-restricted TAD boundary	1	95380000	95640000	-0.240418	0.000248331	0.09;0.22;0.13;0.13;0.62;1;1.39;1.77;1.86;2.18;1.7;1.57;0.17	0.52;0.68;0.44;0.11;0.88;1.53;2.11;2.94;3.3;3.69;3.37;2.42;0.49	0.43;0.46;0.3;0.02;0.26;0.53;0.71;1.17;1.44;1.5;1.67;0.85;0.31	ENSSSCG00000004493;ENSSSCG00000021072	SIGLEC15;EPG5	0.65;22.67	0.62;26.03	0.26;0.1	0.579093942234027;0.533028955909707
Muscle-restricted TAD boundary	1	190260000	190400000	-0.280437	9.03465e-05	1.73;1.94;2.07;2.12;2.42;2.31;1.9	0.11;0.03;0.77;1.93;2.82;2.99;0.41	1.62;1.91;1.3;0.18;0.4;0.67;1.48	-	-	-	-	-	-
Muscle-restricted TAD boundary	1	243020000	243160000	-0.368012	0.000100201	0.2;0.4;0.39;0.07;0.7;0.51;0.94	-1.24;-1.14;-1.39;-0.42;0.27;0.56;0.86	2.56;2.46;2.21;1.65;0.98;1.07;1.8	ENSSSCG00000005398;ENSSSCG00000027974;ENSSSCG00000034239;ENSSSCG00000035245;ENSSSCG00000038300;ENSSSCG00000042524	Unknown;MRPL50;ZNF189;BAAT;ALDOB;Unknown	460.38;42.37;37.49;0.22;9950.2;2.23	0.64;30.19;30.7;0;1.28;2.1	9.65;0.55;0.46;-;12.91;0.33	4.96331915818674e-163;0.0147104385384196;0.00773152470686889;-;3.44256980252758e-105;0.227360436171005
Muscle-restricted TAD boundary	2	34180000	34360000	-0.247544	0.000407518	-1.06;-1.29;-1.19;-1.27;-1.38;-1.42;-1.14;-1.2;-1.34	-2.08;-2.02;-2.2;-3.92;-3.98;-2.15;-2.06;-2.2;-2.27	0.98;1.26;0.98;1.34;1.39;1.26;1.07;0.99;1.07	-	-	-	-	-	-
Muscle-restricted TAD boundary	2	37380000	37560000	-0.225428	0.00968797	-3.27;-3.33;-3.6;-3.54;-3.72;-3.6;-3.53;-3.43;-3.65	-1.72;-1.57;-1.44;-2.86;-2.71;-2.47;-2.4;-2.19;-2.57	2.45;2.24;1.83;1.32;0.99;0.87;0.86;0.75;0.91	ENSSSCG00000044581;ENSSSCG00000048514	Unknown;Unknown	0.16;0.98	0.07;1.59	-;0.43	-;0.143099762543726
Muscle-restricted TAD boundary	2	147040000	147220000	-0.373726	0.00176735	-4.34;-3.22;-3.78;-4;-2.38;-2.42;-2.42;-4.78;-2.79	-4.89;-2.14;-2.81;-1.71;-0.58;-0.94;0.73;-3.48;0.37	0.55;0.91;1.02;1.71;2.2;2.52;2.85;0.69;2.84	ENSSSCG00000014406;ENSSSCG00000041978	PRELID2;Unknown	13.36;0.61	17;1.45	0.34;0.82	0.332029482183362;9.77987984796368e-05
Muscle-restricted TAD boundary	3	6480000	6660000	-0.314007	0.000247704	3.12;2.6;2.2;1.8;1.47;1.23;0.81;0.69;1.75	3.43;2.79;2.11;0.55;0.36;-0.53;-1.84;-1.34;0.88	0.31;0.18;0.09;1.25;1.84;2.7;2.98;3.36;0.86	ENSSSCG00000007617;ENSSSCG00000007618;ENSSSCG00000023320;ENSSSCG00000029175;ENSSSCG00000031485;ENSSSCG00000039842;ENSSSCG00000043842	ZNF655;ZNF789;CYP3A29;FAM200A;Unknown;ZSCAN25;TMEM225B	28.27;21.07;116.32;1.6;2.75;3.89;0.53	27.8;23.43;2.92;5.49;5.41;4.65;0.68	0.03;0.12;5.28;0.45;0.93;0.24;0.35	0.790483441186813;0.599103568357982;3.6692821709014e-42;2.72227299450139e-11;0.000647982122369798;0.326273629070923;0.214392054304204
Muscle-restricted TAD boundary	3	34340000	34560000	-0.312145	9.90924e-05	-2.27;-2.17;-2.16;-2.21;-2.16;-4;-4;-3.92;-3.97;-2.29;-2.12	-2.64;-2.38;-2.43;-2.55;-1.01;-2.89;-1.28;-2.96;-1.25;-2.2;-2.87	0.37;0.2;0.26;0.33;0.84;0.89;1.28;1.03;1.28;0.08;0.74	-	-	-	-	-	-
Muscle-restricted TAD boundary	3	34840000	35020000	-0.312145	9.90924e-05	-3.92;-3.91;-3.85;-3.85;-4;-2.03;-4;-3.93;-3.98	-1.69;-1.76;-1.91;-0.07;-0.54;-0.57;-0.87;-1.91;-0.73	1.77;1.84;2.05;2.21;2.53;2.54;2.86;1.98;2.74	-	-	-	-	-	-
Muscle-restricted TAD boundary	3	35620000	35800000	-0.214939	0.000961342	-3.94;-3.93;-3.94;-3.87;-3.82;-3.87;-2.06;-3.98;-3.9	-2.74;-3.89;-3.7;-3.47;-3.31;-3.35;-3.11;-3.18;-2.16	0.8;0.04;0.24;0.4;0.5;0.52;0.94;0.8;0.25	-	-	-	-	-	-
Muscle-restricted TAD boundary	4	46620000	46760000	-0.284856	6.50688e-05	-2.58;-2.84;-1.46;-0.34;0.89;0.29;-1.17	-4.71;-4.82;-3.58;-2.72;-0.01;0.87;-3.05	1.86;2.01;1.88;1.61;1.09;0.58;2.11	ENSSSCG00000006125	CALB1	1.48	0.52	1.67	0.00580817
Muscle-restricted TAD boundary	4	58860000	59040000	-0.242664	0.000960869	-3;-1.15;-1.3;-1.06;-2.87;-2.81;-2.7;-2.61;-2.65	-1.8;-0.18;-0.03;-1.59;-1.39;-1.34;-1.26;-1.32;-1.29	0.79;1.03;0.73;0.53;0.52;0.52;0.55;0.71;0.63	-	-	-	-	-	-
Muscle-restricted TAD boundary	4	59660000	59800000	-0.223665	0.000146056	-0.19;-1.67;-1.38;-1.16;-2.98;-2.89;-2.99	-0.15;-1.81;-1.66;-1.55;-1.24;-1.46;-1.44	0.04;0.14;0.28;0.39;0.26;0.56;0.45	ENSSSCG00000045839	Unknown	0.46	0.22	-	-
Muscle-restricted TAD boundary	4	68040000	68180000	-0.202218	0.000537453	1.48;1.7;1.39;1.02;0.33;0.3;0.14	0.1;1.02;0.87;0.83;0.04;0.22;0.35	1.37;0.67;0.52;0.18;0.38;0.08;0.2	ENSSSCG00000006209;ENSSSCG00000027872	VCPIP1;MYBL1	40.94;8.14	24.04;2.03	0.89;2.07	1.78526050925247e-05;5.02125074187131e-05
Muscle-restricted TAD boundary	5	11660000	11800000	-0.250436	9.59161e-05	3.24;3.01;2.89;3.07;2.99;3.34;3.03	4.41;4.09;3.92;4.78;4.74;4.57;4.58	1.16;1.07;1.02;1.7;1.74;1.23;1.55	-	-	-	-	-	-
Muscle-restricted TAD boundary	5	19080000	19220000	-0.250908	0.000197535	1.8;1.87;1.95;1.93;2.06;2.16;1.94	1.78;2.04;2.8;2.96;3.47;3.8;2.38	0.02;0.17;0.84;1.02;1.4;1.64;0.43	ENSSSCG00000000279;ENSSSCG00000000281;ENSSSCG00000022728;ENSSSCG00000028104;ENSSSCG00000034474	HOXC13;HOXC12;HOXC10;HOXC11;HOXC9	0.1;0.01;0.01;0.03;0.08	0.04;0;3.91;0.26;21.05	-;-;8.85;-;7.08	-;-;0.0128032705373378;-;5.21854971388328e-19
Muscle-restricted TAD boundary	5	30540000	30680000	-0.2081	0.00056356	0.34;0.46;0.62;0.68;0.92;0.82;-0.89	-0.12;-1.85;-1.73;-0.11;-0.34;-0.78;-0.31	1.54;1.68;1.64;1.21;0.73;0.4;0.58	ENSSSCG00000000477	HELB	19.31	14.94	0.43	0.0106779
Muscle-restricted TAD boundary	5	35000000	35140000	-0.200076	0.00304323	-2.76;-2.69;-2.69;-2.67;-2.63;-2.47;-2.48	-2.79;-2.74;-2.89;-2.88;-2.67;-2.64;-2.57	0.03;0.05;0.19;0.21;0.03;0.17;0.09	-	-	-	-	-	-
Muscle-restricted TAD boundary	5	55080000	55220000	-0.248594	0.000192943	-3.09;-5;-3.08;-3.08;-3.25;-3.14;-3.34	-5.69;-5.76;-5.68;-5.64;-5.88;-5.88;-5.91	1.39;1.24;1.4;1.44;1.37;1.25;1.42	-	-	-	-	-	-
Muscle-restricted TAD boundary	5	55860000	56040000	-0.248594	0.000192943	-3.47;-3.5;-3.63;-3.58;-3.65;-3.87;-3.96;-2.19;-3.72	-5.68;-5.8;-5.76;-5.69;-5.72;-5.93;-5.89;-5.87;-5.97	1.78;1.69;1.86;1.89;1.93;1.93;2.07;2.31;1.75	-	-	-	-	-	-
Muscle-restricted TAD boundary	5	57220000	57400000	-0.248594	0.000192943	-2.12;-2.25;-2.93;-1.13;-1.04;-1.03;-2.94;-2.95;-2.49	-4.71;-4.83;-3.61;-3.93;-2.19;-2.35;-2.51;-2.39;-3.08	1.4;1.41;1.31;1.2;0.84;0.68;0.43;0.55;1.41	ENSSSCG00000000601;ENSSSCG00000000602	PTPRO;RERG	0.75;8.4	0.96;8.67	0.04;0.07	0.943995492864633;0.863927665066517
Muscle-restricted TAD boundary	5	63120000	63300000	-0.335676	7.67865e-05	0.27;0.63;-0.44;-0.5;-0.62;-0.31;-0.36;-0.29;-0.88	-1.53;-2.33;-4.81;-4.23;-4.21;-5.82;-5.71;-5.42;-3.36	2.2;3.04;3.62;4.26;4.4;4.48;4.65;4.87;3.51	ENSSSCG00000025179;ENSSSCG00000031242;ENSSSCG00000038418	NECAP1;CLEC4D;CLEC4E	54.88;1.15;2.32	52.19;1.95;0.25	0.15;0.66;5.27	0.421446016400682;0.0433911589544686;0.000198934350218706
Muscle-restricted TAD boundary	5	79480000	79660000	-0.323052	4.89226e-05	1.65;1.45;1.32;1.52;1.86;1.52;1.26;1.28;1.65	0.95;0.37;0.17;0.07;0.28;0.88;-0.77;-0.68;0.08	0.69;1.08;1.14;1.45;2.15;2.4;2.5;2.61;1.56	ENSSSCG00000000838;ENSSSCG00000000839;ENSSSCG00000027792;ENSSSCG00000046998	SLC41A2;ALDH1L2;C12ORF45;Unknown	189.54;34.5;138.33;2.09	11.77;55.94;96.64;2.9	4.04;0.58;0.61;0.45	9.87001405018635e-88;0.112452149867531;0.00319991437640673;0.175748815828566
Muscle-restricted TAD boundary	5	101560000	101760000	-0.282257	0.00177715	1.05;0.87;0.85;0.49;1.03;1.16;1.25;1.02;1.22;1.31	2.16;1.1;0.73;0.42;0.36;0.8;-0.79;-0.31;1.76;-0.89	1.1;0.23;0.11;0.92;1.39;1.97;2.47;2.71;0.54;2.43	ENSSSCG00000036560	PAWR	73.62	4.51	4.05	6.55818e-47
Muscle-restricted TAD boundary	6	29020000	29160000	-0.293696	0.00131587	3.17;2.98;3.08;0.22;0.36;0;2.59	1.27;0.52;0.06;-2.34;-4.57;0;0.5	1.89;2.46;3.15;3.88;5.06;0;3.09	ENSSSCG00000002764	SMPD3	9.98	0.13	6.41	1.77316e-85
Muscle-restricted TAD boundary	6	33800000	33940000	-0.303464	8.37211e-05	0.3;0.38;0.55;0.46;0.41;0.31;0.31	-1.02;-2.75;-1.18;-1.43;-1.43;-1.85;-2.86	2.67;2.87;2.27;2.1;2.16;1.83;2.83	-	-	-	-	-	-
Muscle-restricted TAD boundary	6	59700000	59840000	-0.277731	0.000123385	4.3;4.87;4.44;4.06;3.17;2.7;4.31	5.49;5.72;5.52;3.72;2.04;1.49;4.92	1.18;0.85;1.07;0.34;1.13;1.2;0.61	ENSSSCG00000024661;ENSSSCG00000025138;ENSSSCG00000029156;ENSSSCG00000031349;ENSSSCG00000033985;ENSSSCG00000034466;ENSSSCG00000034815;ENSSSCG00000035081;ENSSSCG00000037024;ENSSSCG00000039670;ENSSSCG00000040721	ZNF524;ZNF579;ZNF865;ZNF580;FIZ1;GLRX;U2AF2;CCDC106;ZNF784;EPN1;ZNF581	21.28;2.97;1.79;4.37;4.29;0.21;74.57;6.02;10.81;56.32;1.83	48.46;6.14;5.17;8.63;6.76;0.46;89.34;3.91;19.57;86.49;2.18	0.62;0.86;0.47;0.97;0.65;-;0.38;0.61;0.89;0.71;0.33	6.00620219194522e-08;0.00196679859647351;0.000285227013869258;8.73126586748058e-05;0.0102129664894141;-;0.0690837585534274;0.0119628985366262;0.000480089271896448;0.0191349325438557;0.190583916399158
Muscle-restricted TAD boundary	6	106300000	106500000	-0.253584	0.00010677	1.38;1.19;0.8;0.55;0.4;0.32;0.27;0.04;0.1;0.27	1.63;0.96;0.39;0.19;0.42;0.74;-0.7;-0.55;-0.5;0.99	0.25;0.22;0.41;0.35;0.83;1.07;1.57;1.5;1.39;1.26	ENSSSCG00000003699;ENSSSCG00000021893;ENSSSCG00000026051;ENSSSCG00000032125	GREB1L;ROCK1;GRPEL1;PLP2	4.77;71.99;0.08;0.25	5.7;35.67;0;0.33	0.25;1.12;-;-	0.292947640936984;6.92846951526642e-08;-;-
Muscle-restricted TAD boundary	6	107960000	108100000	-0.268714	0.00041903	1.94;1.8;1.95;1.91;2.17;2.11;1.87	-0.59;-0.71;-0.7;-0.51;-0.58;-0.8;-0.72	3.35;3.09;3.26;3.41;3.59;3.32;3.16	-	-	-	-	-	-
Muscle-restricted TAD boundary	6	118920000	119060000	-0.330842	0.000151231	-0.87;-0.89;-0.94;-0.42;-0.13;-0.32;-0.2	1.98;1.97;2.3;1.24;0.28;0.26;0.53	3.12;3.09;3.37;2.82;2.15;1.95;2.33	-	-	-	-	-	-
Muscle-restricted TAD boundary	6	153900000	154040000	-0.215733	0.000393228	-1.2;-2.73;-2.45;-2.18;-2.02;-3.73;-3.84	-2.84;-3.98;-3.32;-4.98;-4.56;-4.2;-4.32	0.35;0.74;1.13;1.19;1.46;1.52;1.52	-	-	-	-	-	-
Muscle-restricted TAD boundary	7	19300000	19440000	-0.20136	0.00138588	0.35;0.52;0.52;0.38;0.31;0.59;0.29	-1.93;-1.73;-0.2;-1.91;-0.05;-0.66;-1.9	2.42;2.8;2.32;2.48;2.26;1.94;2.4	ENSSSCG00000001089;ENSSSCG00000001090	GPLD1;ALDH5A1	120.58;101.11	0.52;36.99	7.93;1.39	1.00403104077192e-59;1.67291288491993e-06
Muscle-restricted TAD boundary	7	23060000	23240000	-0.414568	0.000288377	3.37;3.83;3.9;3.91;4.31;4.1;4.49;4.2;3.51	4.32;5.24;5.15;5.42;6.12;5.37;5.82;5.67;4.3	0.94;1.41;1.25;1.51;1.8;1.26;1.33;1.47;0.78	ENSSSCG00000001346;ENSSSCG00000001347;ENSSSCG00000001372;ENSSSCG00000001376;ENSSSCG00000021130;ENSSSCG00000023639;ENSSSCG00000024604;ENSSSCG00000025892;ENSSSCG00000025943;ENSSSCG00000029425;ENSSSCG00000031492	ABCF1;PPP1R10;GNL1;DHX16;RPP21;NRM;ATAT1;PRR3;C6ORF136;MRPS18B;PPP1R18	61.72;18.44;21.68;14.24;19.97;2.69;4.71;5.47;12.28;160.42;6.83	73.01;17.37;15.1;21.53;36.65;3.92;5.93;8.21;26.87;176.45;7.41	0.13;0.02;0.51;0.59;0.92;0.79;0.19;0.5;0.91;0.21;0.11	0.520265623997664;0.933327949104929;0.00467743729555914;0.00239761199925379;0.000118572600737259;0.392996010075927;0.45797950956453;0.0529581043529316;7.78171056124924e-05;0.323842461393264;0.440318537657052
Muscle-restricted TAD boundary	7	73180000	73360000	-0.231272	0.000245222	-1.15;-1.09;-1.04;-1.16;-2.98;-2.8;-2.78;-2.73;-1.1	-3.34;-3.29;-3.36;-3.32;-3.01;-3.02;-3.03;-4.82;-3.1	1.81;1.79;1.67;1.84;1.97;1.78;1.74;1.91;1.99	ENSSSCG00000049021;ENSSSCG00000050140	Unknown;GCSH	0.79;0.78	0.98;0.71	0.01;0.54	0.972088865662648;0.338315261360422
Muscle-restricted TAD boundary	7	93760000	93900000	-0.209038	0.000765773	0.62;0.64;0.46;0.6;0.76;0.84;0.63	1.24;1.02;0.41;0.21;0.29;0.41;0.12	0.61;0.37;0.04;0.39;0.46;0.42;0.51	ENSSSCG00000002315;ENSSSCG00000002316	SLC8A3;COX16	0.15;40.66	21.65;28.13	5.26;0.59	1.93732089918908e-64;0.0131703366118394
Muscle-restricted TAD boundary	8	5060000	5200000	-0.305287	0.000354471	0.57;0.31;0.19;0.1;0.19;0.34;0.46	0.58;0.98;-1.97;-1.65;-2.97;-2.67;-0.45	1.16;1.3;2.23;2.46;2.84;2.99;2.02	-	-	-	-	-	-
Muscle-restricted TAD boundary	8	13880000	14060000	-0.21791	0.000571489	-1.51;-1.55;-1.87;-1.58;-1.16;-1.05;-2.76;-1.15;-1.04	-1.41;-1.58;-1.77;-1.78;-1.64;-1.47;-1.4;-1.46;-1.42	0.09;0.03;0.09;0.19;0.48;0.41;0.63;0.31;0.38	-	-	-	-	-	-
Muscle-restricted TAD boundary	8	15940000	16080000	-0.250528	0.000843188	-2.75;-2.66;-2.75;-2.57;-2.77;-2.73;-2.76	-3.34;-3.28;-3.2;-3.1;-3.41;-3.48;-3.37	1.4;1.38;1.55;1.47;1.35;1.25;1.38	-	-	-	-	-	-
Muscle-restricted TAD boundary	8	16900000	17040000	-0.275515	8.14781e-05	0.81;0.86;-0.99;-0.68;-0.61;0.73;-0.42	-0.42;-1.9;-1.73;-1.57;-1.42;0.98;-1.27	0.76;1.23;1.25;1.1;1.19;0.25;1.14	-	-	-	-	-	-
Muscle-restricted TAD boundary	8	55660000	55860000	-0.21197	0.000102994	4.15;4.43;4.48;4.07;3.58;3.35;3.42;3.65;4.67;3.62	4.89;5.08;5.37;4.85;4.18;3.51;3.06;3.41;5.34;3.22	0.73;0.65;0.89;0.78;0.6;0.16;0.36;0.24;0.67;0.4	ENSSSCG00000008899;ENSSSCG00000008900;ENSSSCG00000008901;ENSSSCG00000008902;ENSSSCG00000032353;ENSSSCG00000043888	ARL9;SRP72;PAICS;PPAT;THEGL;Unknown	1.71;224.45;180.06;108.71;0.56;5.32	4.96;110.27;26.31;4.04;0.01;5.81	0.64;1.07;2.67;4.7;5.93;0	9.76990656289629e-06;1.1082533005916e-08;1.33628493581255e-36;2.00822980950112e-62;0.00155615053272563;0.995933102979657
Muscle-restricted TAD boundary	8	58900000	59040000	-0.215683	0.000706662	-0.2;-0.36;-0.3;-0.54;0.96;-0.66;-0.63	-2.95;-2.92;-1.07;-1.16;-1.31;-1.36;-1.17	1.25;1.43;1.23;1.37;1.73;1.29;1.46	ENSSSCG00000049794	Unknown	0.22	0.49	-	-
Muscle-restricted TAD boundary	8	65420000	65560000	-0.356635	0.000389124	2.73;2.64;2.59;1.82;1.55;1.5;1.51	1.92;1.84;1.61;0.25;-0.5;-1.57;-1.91	0.8;0.8;0.98;2.08;3.05;3.93;3.6	ENSSSCG00000008924	UBA6	49.55	19.82	1.5	3.53062e-14
Muscle-restricted TAD boundary	8	66160000	66300000	-0.273779	0.000345029	1.04;0.47;0.17;0.07;0.15;0.02;0.7	-1.56;-2.53;-2.05;-3.46;-3.44;-3.27;-2.89	3.48;3.94;4.13;4.62;4.4;4.7;3.81	ENSSSCG00000034735;ENSSSCG00000037635;ENSSSCG00000040980;ENSSSCG00000047476	Unknown;Unknown;Unknown;Unknown	1.78;0.14;2631.98;89.72	1.45;0;0.5;0	0.68;-;12.74;11.56	0.209837494098605;-;0;1.87773093237422e-27
Muscle-restricted TAD boundary	8	111880000	112100000	-0.207867	0.000314114	1.2;1.39;1.28;1.34;1.51;1.66;2.02;2.65;2.38;1.38;2.52	2.75;2.61;2.9;2.39;2.4;2.69;2.84;3.37;3.02;2.82;3.26	1.55;1.22;1.61;1.05;0.89;1.02;0.82;0.71;0.64;1.43;0.73	ENSSSCG00000009133	Unknown	1.56	5.78	0.16	0.00176051
Muscle-restricted TAD boundary	9	42720000	42860000	-0.256749	0.000163422	1.26;1.27;1.27;1.31;1.45;1.54;1.22	1.05;1.03;1.09;1.03;0.98;0.88;1.14	0.2;0.24;0.17;0.28;0.46;0.65;0.08	-	-	-	-	-	-
Muscle-restricted TAD boundary	11	2740000	2940000	-0.208445	0.0001488	2.47;2.71;3.01;2.96;2.95;2.82;3.36;3.21;2.36;3.2	3.36;3.67;4.11;4.08;3.84;3.55;4.02;3.91;3.68;3.67	0.89;0.95;1.1;1.12;0.89;0.72;0.66;0.7;1.31;0.46	ENSSSCG00000009285;ENSSSCG00000009290;ENSSSCG00000031308	C1QTNF9;MIPEP;Unknown	1.59;47.99;0.14	31.66;54.28;0.04	2.13;0.38;-	1.33991005508795e-08;0.0602400343882956;-
Muscle-restricted TAD boundary	11	26320000	26460000	-0.236305	4.37371e-05	-1.23;-2.88;-2.5;-2.27;-2.13;-2.2;-2.85	-0.54;0.69;-0.7;-1.97;-1.78;-1.74;-0.83	1.31;2.43;2.19;1.69;1.64;1.53;1.98	ENSSSCG00000009444	OLFM4	0.44	0.08	-	-
Muscle-restricted TAD boundary	11	43060000	43200000	-0.237513	0.000193699	-0.3;-0.27;-0.02;-1.75;-1.79;-1.7;-1.86	-2.4;-2.09;-2.1;-2.13;-2.17;-2.24;-2.08	1.9;2.18;1.91;1.61;1.62;1.45;1.77	-	-	-	-	-	-
Muscle-restricted TAD boundary	12	49540000	49680000	-0.233712	0.00073086	-2.3;-2.75;-1.16;-1.08;-1.19;-3.84;-1.38	-4.89;-3.5;-2.05;-2.35;-2.57;-4.79;-2.35	1.4;1.24;1.1;0.72;0.62;1.04;1.03	ENSSSCG00000017861;ENSSSCG00000017862;ENSSSCG00000029709;ENSSSCG00000041283	ASPA;TRPV3;Unknown;Unknown	11;0.22;3.36;0.2	15.75;1.47;1.78;0.28	0.84;1.14;0.96;-	0.0344460642280895;1.46230308067106e-10;0.0518154992350404;-
Muscle-restricted TAD boundary	12	52080000	52220000	-0.273143	0.000587344	4.18;3.83;4.17;3.9;3.74;3.2;3.89	3.99;3.8;3.62;3.79;3.12;2.95;3.72	0.19;0.03;0.54;0.11;0.61;0.24;0.16	ENSSSCG00000017912;ENSSSCG00000017913;ENSSSCG00000017914;ENSSSCG00000017915;ENSSSCG00000017918;ENSSSCG00000017919;ENSSSCG00000017920;ENSSSCG00000017921;ENSSSCG00000017924;ENSSSCG00000031112	PLD2;PSMB6;GLTPD2;VMO1;ARRB2;MED11;CXCL16;ZMYND15;PELP1;TM4SF5	4.9;489.45;63.92;12.86;42.89;55.59;87.7;0.16;9.09;35.12	9.65;585.19;0.05;43.4;19.14;30.78;7.22;0.01;23.88;0.02	0.96;0.24;11.81;0.22;1.08;0.92;3.64;-;0.61;11.17	2.91143612957279e-09;0.141582908800821;1.75113196428703e-27;1.06421461018645e-06;1.73365626899705e-05;4.80041538794718e-05;3.81634623455781e-18;-;2.99962490438571e-09;1.93538331784271e-23
Muscle-restricted TAD boundary	12	56440000	56620000	-0.289615	0.000196503	-2.86;-2.94;-2.34;-2.36;-2.25;-2.12;-3.96;-3.79;-2.56	-2.23;-2.13;-3.56;-3.3;-3.17;-3.03;-3.12;-4.94;-3.62	0.62;0.81;0.78;1.06;1.08;1.09;0.84;0.85;0.93	-	-	-	-	-	-
Muscle-restricted TAD boundary	13	38780000	38920000	-0.220749	0.0090248	1.83;1.56;1.41;1.45;1.33;1.19;1.96	2.02;2.09;2.71;2.65;3.02;2.79;2.14	0.19;0.53;1.3;1.2;1.68;1.6;0.17	-	-	-	-	-	-
Muscle-restricted TAD boundary	14	10500000	10640000	-0.227284	0.000203787	1.32;1.15;0.7;0.43;0.33;0.12;0.09	0.18;0.25;0.76;-0.45;-1.72;-1.59;-1.59	1.13;1.4;1.46;1.98;2.61;2.29;2.51	-	-	-	-	-	-
Muscle-restricted TAD boundary	14	48160000	48300000	-0.202163	0.000338435	3.52;3.53;3.48;2.97;3.28;3.26;3.16	4.41;4.29;4.4;3.6;3.63;3.81;3.86	0.89;0.75;0.91;0.62;0.35;0.54;0.69	ENSSSCG00000010030;ENSSSCG00000010031;ENSSSCG00000035290	EIF4ENIF1;SFI1;Unknown	14.19;41.88;8.47	19.03;1.89;2.03	0.32;4.19;2.14	0.15461009804913;1.55404728916939e-53;1.02571123547228e-07
Muscle-restricted TAD boundary	14	71560000	71700000	-0.277087	0.000161291	3.11;3.24;3.17;3.1;3.09;3.04;3.03	3.68;3.84;3.95;4;3.79;3.55;3.98	0.57;0.6;0.78;0.9;0.69;0.5;0.94	ENSSSCG00000010240;ENSSSCG00000010241;ENSSSCG00000022303	DNA2;TET1;SLC25A16	23.5;17.14;60.68	5.83;35.11;7.56	2.05;0.98;3.08	5.21852894954875e-09;1.31174441064183e-07;5.83369900866773e-42
Muscle-restricted TAD boundary	14	76120000	76260000	-0.214088	1.86951e-05	3.49;3.43;3.77;3.91;4.05;4.06;3.48	3.71;3.87;4.31;4.45;4.9;4.85;3.78	0.22;0.43;0.53;0.53;0.84;0.78;0.3	ENSSSCG00000010298;ENSSSCG00000010299	CFAP70;ANXA7	1.75;132.32	3.51;236.17	0.92;0.72	0.00140831026961006;0.000120793588225756
Muscle-restricted TAD boundary	14	81800000	81940000	-0.243763	6.01152e-05	2.34;2.32;2.31;2.09;1.85;1.4;1.14	4.58;4.17;4.4;4.1;3.86;3.11;2.18	2.23;1.84;2.09;2;2.01;1.71;1.03	ENSSSCG00000010331;ENSSSCG00000010332	ANXA11;PLAC9	57.96;11.25	116.75;90.01	0.89;2.91	1.57758095731013e-05;7.41701826676347e-26
Muscle-restricted TAD boundary	14	97260000	97400000	-0.227945	0.000864305	-3.29;-3.23;-3.4;-3.67;-3.77;-3.54;-3.47	-3.5;-3.63;-3.82;-2.2;-2.46;-2.25;-2.23	0.2;0.39;0.42;0.52;0.69;0.71;0.75	-	-	-	-	-	-
Muscle-restricted TAD boundary	14	108020000	108160000	-0.244762	9.33448e-05	3.13;2.7;2.57;2.6;2.63;2.55;2.61	0.28;0.85;-0.3;-1.84;-1.21;-2.56;-2.73	2.84;3.56;4.27;4.76;5.43;6;5.89	ENSSSCG00000010508	TM9SF3	348.59	156.48	1.2	8.48962e-10
Muscle-restricted TAD boundary	14	108240000	108380000	-0.383268	5.99275e-05	2.12;2.45;2.92;2.93;2.93;2.95;2.38	-1.73;0.79;0.71;0.82;0.95;0.97;-0.03	4.4;3.25;2.21;2.11;1.97;1.97;4.35	ENSSSCG00000010509;ENSSSCG00000010513	PIK3AP1;LCOR	55.1;31.36	7.08;33.96	3.05;0.11	7.24787575301776e-31;0.491568266386848
Muscle-restricted TAD boundary	14	124560000	124700000	-0.263609	0.000332115	1.04;0.99;0.78;0.7;0.62;0.47;0.6	0.71;0.91;0.94;1.32;2.18;2.45;1.79	0.32;0.08;0.16;0.62;1.56;1.97;1.18	ENSSSCG00000010649	VWA2	0.7	0.99	0.47	0.303705
Muscle-restricted TAD boundary	14	140060000	140200000	-0.255034	2.09898e-05	0.32;0.2;0.17;0.27;0.13;0.19;0.25	0.8;0.77;0.33;0.01;0.22;0.67;0.59	0.48;0.57;0.16;0.28;0.08;0.48;0.33	-	-	-	-	-	-
Muscle-restricted TAD boundary	14	140260000	140400000	-0.255034	2.09898e-05	1.25;1.49;1.61;2.54;3.42;2.75;3.5	1.92;2.46;2.79;4.03;4.96;4.43;5.39	0.67;0.96;1.17;1.49;1.54;1.67;1.88	ENSSSCG00000024388;ENSSSCG00000024633;ENSSSCG00000027988	BNIP3;JAKMIP3;Unknown	198.83;0.17;16.78	172.65;0.28;15.96	0.08;-;0.16	0.61070931737102;-;0.450920121912505
Muscle-restricted TAD boundary	14	141340000	141480000	-0.536917	6.55583e-05	4.47;3.56;2.61;1.74;0.59;0.04;1.29	4.16;2.96;0.77;-0.54;-3.63;-4.41;-2.66	0.3;0.6;1.83;3.21;4.97;5.63;4.64	ENSSSCG00000010787;ENSSSCG00000010788;ENSSSCG00000029088;ENSSSCG00000038086;ENSSSCG00000039939;ENSSSCG00000040586	SCART1;Unknown;MTG1;ECHS1;Unknown;AL360181.3	0.04;0.04;42.14;825.91;0.01;20.33	0;0;100.15;237.76;0;12.32	-;-;0.69;1.58;-;0.64	-;-;6.26044105371653e-08;1.37615038823085e-11;-;0.0155010430152603
Muscle-restricted TAD boundary	15	7400000	7580000	-0.220106	0.000245037	0.48;0.47;0.47;0.92;1.31;1.3;1.65;1.58;0.65	1.07;1.19;1.26;1.75;2.9;3.01;3.47;3.03;1.39	0.59;0.71;0.79;0.83;1.58;1.71;1.81;1.44;0.73	ENSSSCG00000021343	ZEB2	50.85	101.34	0.86	6.77028e-09
Muscle-restricted TAD boundary	15	27000000	27140000	-0.20359	0.00163835	0.59;0.93;-0.9;-0.68;-0.71;0.7;-0.76	-1.3;-1.05;-1.21;-1.32;-1.4;-1.22;-1.55	2.11;2.02;1.68;1.35;1.3;2.07;1.2	-	-	-	-	-	-
Muscle-restricted TAD boundary	15	29980000	30120000	-0.302676	7.22681e-05	3.9;4.02;3.85;3.65;3.6;3.44;4.26	4.22;3.94;3.22;2.94;2.82;2.6;4.31	0.32;0.08;0.62;0.71;0.78;0.83;0.05	ENSSSCG00000015732	TFCP2L1	9.35	0.71	3.61	2.52662e-19
Muscle-restricted TAD boundary	15	63340000	63520000	-0.2146	0.00130881	-0.83;0.75;0.84;0.92;0.68;0.21;0.46;0.9;0.9	-0.04;-0.3;-0.36;-0.43;0.89;0.32;0.99;1.87;-0.7	0.78;0.94;0.79;0.64;0.21;0.11;0.53;0.97;0.39	ENSSSCG00000015871	NR4A2	2.45	4.25	0.71	0.0577261
Muscle-restricted TAD boundary	15	114000000	114180000	-0.266495	0.000325737	-3.74;-3.84;-3.77;-3.92;-3.78;-3.94;-4;-3.66;-3.82	-1.14;-1.35;-1.42;-1.11;-1.37;-1.62;-1.51;-1.15;-1.7	1.4;1.5;1.64;1.18;1.59;1.67;1.5;1.48;1.87	-	-	-	-	-	-
Muscle-restricted TAD boundary	16	8980000	9160000	-0.27061	0.00115883	-1.33;-1.45;-1.49;-1.71;-1.89;-1.94;-1.99;-0.03;-1.54	-2.38;-2.39;-2.45;-2.62;-2.81;-2.83;-2.89;-2.82;-2.53	0.95;1.05;1.04;1.09;1.08;1.11;1.1;1.2;1.01	-	-	-	-	-	-
Muscle-restricted TAD boundary	16	27000000	27180000	-0.207848	0.00048773	-0.51;-0.67;-1;0.78;0.33;0.47;0.34;-0.42;0.4	0.1;0.16;0.41;0.89;1.52;2.95;3.12;0.05;2.58	1.38;1.49;1.41;1.67;1.85;2.48;2.78;1.63;2.17	ENSSSCG00000016866	GHR	95.21	91.19	0.29	0.189028
Muscle-restricted TAD boundary	16	27580000	27720000	-0.225704	0.000678134	2.71;2.57;2.07;1.52;1.45;1.7;1.64	1.99;1.82;1.87;1.64;1.88;2.48;1.55	0.72;0.74;0.2;0.12;0.42;0.78;0.09	ENSSSCG00000021208;ENSSSCG00000048667;ENSSSCG00000050190;ENSSSCG00000051775	SELENOP;Unknown;Unknown;Unknown	9447.97;0;0.27;0.36	465.13;0;0;0	4.36;-;-;-	9.10656072407747e-44;-;-;-
Muscle-restricted TAD boundary	16	40480000	40620000	-0.220855	0.000101899	1.08;0.71;0.64;0.72;0.15;0.2;0.89	0.96;-0.47;-0.17;-0.01;-1.31;-2.86;-0.6	2.04;2.25;2.48;2.71;2.85;2.94;2.3	-	-	-	-	-	-
Muscle-restricted TAD boundary	18	11580000	11720000	-0.280073	6.2054e-05	0.77;0.45;0.34;0.13;0.64;0.81;0.36	0.04;0.28;0.38;-0.91;-0.39;-0.55;-0.64	0.82;0.74;0.72;0.95;0.96;0.63;1	ENSSSCG00000016521	DGKI	0.24	0.17	-	-
Muscle-restricted TAD boundary	18	48460000	48600000	-0.395553	2.35662e-05	1.3;1.58;1.96;2.04;1.9;1.96;1.17	1.17;2.06;2.88;3.18;3.06;3.04;1.46	0.12;0.47;0.91;1.14;1.15;1.08;0.28	ENSSSCG00000022557;ENSSSCG00000023801;ENSSSCG00000028523;ENSSSCG00000033266	SUN3;LANCL2;HUS1;C7ORF57	0.07;29.62;31.59;0.36	0.03;34.61;36.32;0.68	-;0.22;0.14;0.84	-;0.173501517053746;0.625826077513654;0.0277197828540224
Muscle-restricted TAD boundary	18	50700000	50840000	-0.266904	0.000514479	3.11;2.9;2.86;2.7;2.75;2.61;2.87	4.23;3.95;3.78;4;4.1;4.14;3.9	1.11;1.05;0.92;1.3;1.34;1.52;1.03	ENSSSCG00000016745;ENSSSCG00000016746;ENSSSCG00000016747;ENSSSCG00000016751	DDX56;NPC1L1;NUDCD3;GCK	36.51;4.16;69.59;3.38	42.69;0.67;134.14;30.45	0.23;2.34;0.97;1.26	0.458302531323032;7.94636684780218e-19;0.000230450473618216;8.33121455906642e-10
Muscle-restricted TAD boundary	18	51280000	51420000	-0.272722	0.000247024	0.83;0.71;0.58;0.54;0.36;0.32;0.09	1.55;1.54;1.32;1.55;0.93;0.71;0.02	0.72;0.83;0.73;1.01;0.56;0.39;0.06	ENSSSCG00000016758;ENSSSCG00000040496	STK17A;Unknown	18.29;0	8.63;0	1.17;-	1.21184682374385e-08;-

## Sheet: Sheet 2 (liver vs. brain)
Shifted TAD boundaries between liver and brain	Chromosome	Start	End	ΔLBS (liver – brain)	P-value of LBS	A-B index of each TAD boundary bin in liver	A-B index of each TAD boundary bin in brain	|ΔA-B index| (liver – brain)	Gene Ensembl ID	Gene symbol	TPM in liver	TPM in brain	|log2FC of expression|	P-value of expression
Liver-restricted TAD boundary	1	19260000	19400000	0.346856	2.14237e-12	-1.65;-1.7;-1.22;-1.06;-1.06;-1.72;-2.73	-2;-0.07;-1.65;-1.46;-1.61;-1.82;-1.66	0.35;0.36;0.43;0.4;0.54;0.09;0.93	-	-	-	-	-	-
Liver-restricted TAD boundary	1	33020000	33160000	0.281924	1.57512e-11	0.44;0.44;0.37;0.39;0.21;0.02;0.38	0.61;0.44;0.63;0.85;0.83;0.55;0.38	0.17;0;0.25;0.45;0.62;0.53;0	ENSSSCG00000004201;ENSSSCG00000004202	TMEM200A;SAMD3	0.91;1.63	16.07;0.41	4.03;1.77	3.41216325027311e-19;0.000918733396399277
Liver-restricted TAD boundary	1	139960000	140100000	0.417958	2.90985e-14	0.46;0.89;-0.7;-0.48;-0.31;-0.02;0.65	0.98;0.91;0.74;0.8;0.95;-0.88;0.83	0.51;0.01;0.56;0.72;0.74;0.85;0.18	-	-	-	-	-	-
Liver-restricted TAD boundary	1	141020000	141200000	0.230336	1.72211e-11	-1.51;-1.47;-1.6;-1.94;-0.07;-1.98;-0.44;-1.52;-0.15	-0.28;-0.35;-0.66;0.87;0.67;0.99;0.68;-0.14;0.99	0.76;0.88;1.06;1.19;1.25;1.02;0.88;0.62;0.86	-	-	-	-	-	-
Liver-restricted TAD boundary	1	177160000	177300000	0.251215	1.80087e-13	-2.84;-1.01;-1.18;-1.12;-1.06;-1.04;-2.96	-0.77;-0.82;0.9;0.84;0.77;0.61;-0.96	1.93;1.81;1.91;2.04;2.17;2.35;1.99	-	-	-	-	-	-
Liver-restricted TAD boundary	1	221320000	221460000	0.201359	5.46879e-09	2.14;2;1.89;1.99;2.27;2.49;1.91	0.28;0.13;0.02;0.51;0.85;0.85;0.48	1.86;1.87;1.91;2.51;3.13;3.35;2.4	-	-	-	-	-	-
Liver-restricted TAD boundary	1	224780000	224920000	0.219372	4.61998e-11	-1.63;-1.98;-0.2;-0.54;0.62;-1.43;0.21	-0.25;-0.48;-0.64;-0.69;0.79;-0.13;0.03	0.61;0.49;0.44;0.15;0.16;0.69;0.25	-	-	-	-	-	-
Liver-restricted TAD boundary	1	227260000	227440000	0.226335	2.26137e-12	-2.54;-2.59;-2.67;-2.51;-2.51;-2.26;-2.25;-2.61;-2.22	-1.93;-0.01;-0.15;-0.13;-0.15;-1.86;-1.77;-0.05;-1.72	1.38;1.41;1.48;1.62;1.64;1.59;1.52;1.44;1.5	-	-	-	-	-	-
Liver-restricted TAD boundary	1	242660000	242840000	0.267352	1.17424e-12	-1.12;-1.32;-1.32;-1.43;-0.09;-1.85;-1.73;-1.67;-1.57	-1.69;-0.08;-1.68;-1.68;-1.88;-1.79;-1.76;-1.61;-1.76	0.56;0.75;0.36;0.25;0.21;0.06;0.03;0.06;0.18	ENSSSCG00000005393;ENSSSCG00000045284	PLPPR1;Unknown	3.27;1.01	69.63;3.06	4.15;1.5	2.9880696557472e-52;1.33795655588484e-07
Liver-restricted TAD boundary	1	242900000	243040000	0.314254	1.7829e-14	-0.19;-0.49;0.87;0.11;0.06;0.2;0.16	-1.89;-0.31;-0.46;-0.15;-1.96;-1.49;-1.39	0.3;0.18;0.67;1.73;1.97;2.31;2.45	ENSSSCG00000005398;ENSSSCG00000038171;ENSSSCG00000042524	Unknown;Unknown;Unknown	460.38;239.99;2.23	0.43;0.49;4.45	9.85;8.89;0.85	4.57486729738114e-174;1.91484152780444e-130;0.00206096426125418
Liver-restricted TAD boundary	2	7620000	7760000	0.283464	1.96016e-08	5.7;5.63;5.72;5.81;5.65;5.7;5.84	5.24;4.92;5.03;5.13;5.45;5.62;5.43	0.46;0.71;0.68;0.68;0.2;0.07;0.4	-	-	-	-	-	-
Liver-restricted TAD boundary	2	48360000	48540000	0.371854	1.09627e-14	0.24;0.19;0.04;0.24;0.45;0.87;1.01;0.37;0.63	0.78;0.99;1.07;1.16;1.3;1.53;1.56;0.62;1.6	1.03;1.18;1.12;0.92;0.85;0.66;0.54;0.99;0.96	-	-	-	-	-	-
Liver-restricted TAD boundary	2	51460000	51640000	0.203588	8.34629e-10	0.91;0.8;-0.74;-0.43;-0.25;-0.27;-0.42;-0.64;-0.94	0.77;0.61;-1;-0.54;-0.51;-1;0.56;0.35;0.56	0.13;0.19;0.25;0.1;0.26;0.72;1.02;1.01;0.5	ENSSSCG00000046223;ENSSSCG00000048088	Unknown;Unknown	0.54;0.03	1.23;0.35	1.11;-	0.0137666374468092;-
Liver-restricted TAD boundary	2	54480000	54620000	0.207268	2.01897e-10	-4.45;-4.5;-4.41;-4.48;-4.54;-4.53;-4.48	-2.35;-2.37;-2.32;-2.26;-2.41;-2.41;-2.35	1.9;1.87;1.9;1.78;1.86;1.88;1.86	ENSSSCG00000039363	OR2T11	0.04	0	-	-
Liver-restricted TAD boundary	2	56980000	57120000	0.207268	2.01897e-10	-3.11;-3.61;-3.99;-3.93;-3.77;-3.51;-3.34	-2.69;-1.79;-0.92;0.97;-0.46;-1.57;-1.31	1.57;2.18;2.92;3.1;2.68;2.05;1.96	ENSSSCG00000036756;ENSSSCG00000049755	ZNF496;Unknown	7.19;0.02	16.11;0.09	1.15;-	5.53032364902627e-12;-
Liver-restricted TAD boundary	2	58340000	58480000	0.207268	2.01897e-10	0.59;1.1;1.51;2.34;2.82;3.1;2.98	2.54;3.54;4.19;5.04;4.81;4.87;4.83	1.94;2.44;2.67;2.69;1.99;1.77;1.84	ENSSSCG00000013934;ENSSSCG00000013935;ENSSSCG00000013936;ENSSSCG00000013937	CILP2;YJEFN3;NDUFA13;TSSK6	0.03;0.03;90.42;0.36	0.35;14.1;37.84;0.24	-;9.46;0.93;-	-;1.4183172361742e-15;6.83581801414537e-05;-
Liver-restricted TAD boundary	3	37460000	37600000	0.262246	5.59958e-10	4.54;4.46;4.38;4.48;4.41;4.61;4.24	4.34;4.68;4.67;4.78;4.77;4.94;4.44	0.2;0.22;0.28;0.3;0.36;0.33;0.19	ENSSSCG00000007924;ENSSSCG00000007927;ENSSSCG00000007931;ENSSSCG00000007932	UBN1;PPL;GLYR1;ROGDI	16.98;8.21;70.87;49.39	21.8;0.89;81.68;129.59	0.45;2.77;0.26;1.52	0.00939476074896607;8.00162316248428e-12;0.143930583706263;1.9097044946819e-12
Liver-restricted TAD boundary	3	39320000	39460000	0.207816	1.74258e-08	4.17;4.07;4.23;4.29;4.2;3.77;4.03	4.65;4.88;4.69;4.71;4.8;4.38;4.64	0.48;0.8;0.46;0.41;0.59;0.61;0.6	ENSSSCG00000008058;ENSSSCG00000008062;ENSSSCG00000033610;ENSSSCG00000035594;ENSSSCG00000037112	KCTD5;PRSS27;ZG16B;PRSS22;ZG16B	24.97;0.24;0.01;2.71;0	12.25;0.27;0;8.13;0	1;-;-;1.69;-	0.00139640786252365;-;-;5.24658424258577e-09;-
Liver-restricted TAD boundary	3	57540000	57680000	0.202795	0.000234601	0.39;0.31;0.15;0.17;0.21;0.6;0.32	-0.84;0.94;-0.58;-0.34;-0.41;-0.81;-0.4	1.55;1.25;1.58;1.84;1.8;1.8;1.92	ENSSSCG00000036354	FOXI3	0.03	0	-	-
Liver-restricted TAD boundary	3	63760000	63900000	0.412776	3.39797e-14	-5.95;-5.99;-5.92;-5.89;-5.82;-5.82;-5.93	-2.59;-2.62;-2.84;-2.74;-2.66;-2.73;-2.81	2.63;2.62;2.91;2.85;2.83;2.9;2.88	-	-	-	-	-	-
Liver-restricted TAD boundary	3	131520000	131700000	0.202037	8.52211e-10	-1.96;-1.73;-1.53;-1.62;-1.69;-1.74;-1.46;-1.77;-1.43	1.25;0.94;1.02;1.4;1.97;1.75;1.23;1.7;1.11	3.29;3.22;3.49;3.79;4.28;4.01;3.78;3.93;3.68	-	-	-	-	-	-
Liver-restricted TAD boundary	4	5840000	6020000	0.222297	1.84975e-14	-2.83;-2.81;-2.76;-2.91;-2.92;-1.11;-1.3;-1.43;-2.81	0.77;0.9;0.93;0.75;0.75;0.68;0.62;0.47;0.75	2.39;2.28;2.3;2.33;2.33;2.21;2.07;2.1;2.43	-	-	-	-	-	-
Liver-restricted TAD boundary	4	7360000	7540000	0.21937	3.50252e-12	1.69;1.65;1.67;1.79;1.85;2.17;2.2;2.35;2.05	0.74;0.77;0.79;0.8;0.96;0.94;0.98;1.14;0.75	0.94;0.87;0.88;0.98;0.89;1.23;1.21;1.2;1.3	-	-	-	-	-	-
Liver-restricted TAD boundary	4	33520000	33660000	0.266887	1.67008e-10	-1.29;-1.76;-0.32;-0.83;-0.85;0.64;-1.52	-0.71;0.95;0.57;0.05;0.52;0.6;-0.91	1.41;1.29;1.1;1.22;0.62;0.04;1.39	ENSSSCG00000031957	RIMS2	9.22	78.94	3.33	1.50934e-17
Liver-restricted TAD boundary	4	40680000	40820000	0.260742	3.8338e-11	-0.3;-0.32;-0.07;-0.06;-1.61;-1.3;-1.83	-1.35;-1.46;-1.65;-0.04;-1.68;-1.54;-1.81	0.94;0.85;0.42;0.01;0.06;0.23;0.01	-	-	-	-	-	-
Liver-restricted TAD boundary	4	43440000	43620000	0.231661	7.33731e-11	-2.74;-2.79;-2.8;-2.87;-2.85;-2.96;-2.96;-2.95;-2.76	-0.75;-0.79;-0.96;-0.78;-0.75;-0.86;-0.95;-0.89;-0.8	2;1.99;2.15;1.9;1.9;1.9;1.99;1.94;2.03	-	-	-	-	-	-
Liver-restricted TAD boundary	4	45860000	46040000	0.207735	3.47336e-06	-4;-3.92;-3.8;-3.64;-3.54;-3.52;-3.27;-2.14;-3.3	-0.27;-0.38;-0.31;-0.02;-1.88;-1.82;-1.67;-0.3;-1.64	2.27;2.45;2.51;2.38;2.34;2.3;2.39;2.15;2.34	ENSSSCG00000040562;ENSSSCG00000043905;ENSSSCG00000050644	C8ORF88;Unknown;Unknown	1.93;0.99;0.9	2.56;5;2.56	0.52;2.2;1.26	0.232189538220381;2.90698319616854e-05;0.00413585437869297
Liver-restricted TAD boundary	4	82260000	82440000	0.360283	1.06802e-14	1.03;1.02;0.95;0.83;0.79;0.72;0.62;0.7;0.83	-0.31;-0.35;-0.23;-0.22;-0.19;-0.57;-0.22;-0.18;-0.27	2.72;2.67;2.73;2.62;2.6;2.15;2.4;2.52;2.56	ENSSSCG00000006298;ENSSSCG00000035937;ENSSSCG00000037962	XCL1;DPT;Unknown	5.45;22.36;0	0.03;0.11;0	7.48;7.41;-	7.29980683529107e-12;5.94935097236853e-25;-
Liver-restricted TAD boundary	4	121740000	121920000	0.349794	3.00282e-08	-1.42;-1.14;-1.14;-2.98;-1.02;-1.14;-1.11;-1.18;-1.13	-1.12;-1.1;-2.7;-3;-1.1;-1.06;-2.93;-1.09;-1.18	0.3;0.03;0.43;0.01;0.07;0.08;0.17;0.08;0.04	ENSSSCG00000050922	Unknown	0.06	0.18	-	-
Liver-restricted TAD boundary	5	30680000	30820000	0.263744	1.16311e-11	-0.82;-0.55;-0.3;-2;-1.44;-1.05;-2.78	-1.67;-1.39;-1.26;-1.43;-1.31;-2.88;-2.95	1.15;1.15;1.03;0.56;0.13;0.17;0.16	-	-	-	-	-	-
Liver-restricted TAD boundary	5	52120000	52260000	0.229697	3.90347e-06	-0.35;-0.23;-1.94;-1.63;-1.38;-2.9;-0.12	-2.02;-3.86;-3.82;-3.96;-2.25;-3.95;-3.83	2.33;2.36;2.12;1.67;1.13;0.95;2.28	ENSSSCG00000021998	SLCO1B1	1443.43	1.2	9.88	4.7324e-286
Liver-restricted TAD boundary	6	43120000	43260000	0.214622	2.6119e-09	3.86;4.21;4.06;3.65;3.97;3.73;4.04	2.93;3.65;3.37;3;3.12;2.73;3.27	0.93;0.55;0.69;0.64;0.84;0.99;0.77	ENSSSCG00000002867	CEBPG	76.69	18.76	1.97	1.53608e-10
Liver-restricted TAD boundary	6	56680000	56860000	0.346481	4.1542e-05	0.78;0.76;0.57;0.07;0.03;0;0.09;0.35;0.33	0.25;0.37;0.44;0.47;0.47;0.37;0.17;0.3;0.2	1.03;1.13;1.02;0.39;0.43;0.36;0.07;0.04;0.12	ENSSSCG00000040389;ENSSSCG00000042197	Unknown;Unknown	0.02;0	0.03;0	-;-	-;-
Liver-restricted TAD boundary	6	59900000	60040000	0.233911	9.12097e-08	1.83;1.65;1.04;0.71;0.37;0.08;0.19	1.06;1.02;0.45;0.11;0.26;0.53;0.88	0.77;0.63;0.58;0.83;0.63;0.62;0.68	ENSSSCG00000003306;ENSSSCG00000003307;ENSSSCG00000038117;ENSSSCG00000049200	HELZ2;NLRP9;Unknown;Unknown	0.01;0.02;0;0.04	0;0.01;0;0	-;-;-;-	-;-;-;-
Liver-restricted TAD boundary	6	76840000	77020000	0.220662	2.82631e-09	1.19;1.29;1.39;1.34;1.24;1.25;1.34;1.36;1.3	2.15;2.24;2.6;2.59;2.36;2.29;2.43;2.44;2.46	0.96;0.95;1.21;1.24;1.11;1.04;1.09;1.08;1.16	-	-	-	-	-	-
Liver-restricted TAD boundary	6	86460000	86640000	0.230815	3.03844e-08	0.67;0.56;0.51;0.41;0.44;0.43;0.48;0.55;0.55	1.61;1.52;1.35;1.42;1.35;1.35;1.42;1.39;1.55	0.93;0.96;0.84;1.01;0.91;0.91;0.94;0.84;1	-	-	-	-	-	-
Liver-restricted TAD boundary	6	86880000	87060000	0.230815	3.03844e-08	0.26;0.3;0.18;0.27;0.36;0.44;0.68;0.21;0.47	1.61;1.37;1.51;1.26;1.58;1.62;1.74;1.45;1.7	1.35;1.07;1.33;0.99;1.21;1.18;1.06;1.23;1.23	-	-	-	-	-	-
Liver-restricted TAD boundary	6	112220000	112360000	0.206568	3.71933e-08	-2.09;-3.94;-2.06;-3.89;-3.91;-2.22;-4	-2.83;-2.8;-2.82;-2.75;-2.93;-2.95;-2.89	0.74;0.86;0.75;0.86;1.01;0.73;0.89	-	-	-	-	-	-
Liver-restricted TAD boundary	6	118420000	118600000	0.331993	1.85481e-10	-4.37;-4.5;-4.54;-4.84;-3.07;-3.06;-3.19;-3.27;-4.68	-2.41;-2.83;-2.93;-1.02;-1.27;-1.4;-1.41;-1.54;-2.72	2.03;2.33;2.39;2.18;2.2;2.33;2.22;2.26;2.03	-	-	-	-	-	-
Liver-restricted TAD boundary	6	119960000	120100000	0.287811	2.38071e-14	-1.76;-1.75;-1.49;-1.54;-2.96;-2.42;-2.63	-1.06;-1.16;-1.58;-0.22;-1.61;-1.1;-1.32	0.69;0.58;0.09;0.68;0.64;0.67;0.69	ENSSSCG00000027935	FHOD3	0.73	40.51	5.71	1.39747e-79
Liver-restricted TAD boundary	6	135700000	135840000	0.225806	1.11791e-14	0.87;-0.95;-0.5;-0.07;-1.34;-1.34;-1.74	-0.53;-0.44;-0.33;-0.28;-1.91;-1.72;-0.08	0.59;0.51;0.16;0.2;0.57;0.38;0.33	-	-	-	-	-	-
Liver-restricted TAD boundary	6	136580000	136760000	0.201497	1.50361e-12	-3.34;-3.4;-3.37;-3.36;-3.36;-3.43;-3.32;-3.22;-3.34	-1.23;-1.3;-1.38;-1.6;-1.63;-1.68;-1.56;-1.43;-1.55	1.88;1.89;2;2.24;2.26;2.25;2.23;2.21;2.21	ENSSSCG00000041929	Unknown	0.66	1.37	0.99	0.0584166
Liver-restricted TAD boundary	7	36100000	36280000	0.248184	5.20835e-12	1.25;1.11;1.3;1.53;1.75;1.85;1.9;2.14;1.4	0.64;0.42;0.61;1.01;1.19;1.4;1.33;1.46;0.72	0.6;0.68;0.69;0.52;0.56;0.44;0.56;0.67;0.67	-	-	-	-	-	-
Liver-restricted TAD boundary	7	90780000	90960000	0.226934	2.675e-09	0.73;0.73;1.09;1.1;1.36;1.51;1.77;2.18;1.01	0.48;0.34;0.02;0.25;0.09;0.12;0.37;0.85;0.15	1.21;1.08;1.11;1.36;1.45;1.39;1.4;1.33;1.16	ENSSSCG00000002286;ENSSSCG00000002287	FAM71D;MPP5	1.8;40.46	1.43;35.52	0.28;0.24	0.43334283744821;0.410008434452161
Liver-restricted TAD boundary	7	109140000	109280000	0.224381	1.39527e-11	-4.67;-4.29;-5.95;-5.96;-5.61;-5.62;-4.27	-2.18;-2.18;-2.12;-2.17;-2.18;-4;-2.07	1.5;1.88;2.17;2.21;2.56;2.38;1.79	ENSSSCG00000042684	Unknown	0.42	2.51	2.64	7.88873e-05
Liver-restricted TAD boundary	7	109600000	109740000	0.224381	1.39527e-11	-5.23;-5.47;-5.5;-5.43;-5.62;-4.07;-5.77	-2.25;-2.48;-2.55;-2.42;-2.48;-2.42;-2.62	3.02;3;3.04;2.98;2.85;2.35;2.85	ENSSSCG00000037928	Unknown	3.79	6.9	0.85	0.229892
Liver-restricted TAD boundary	7	113860000	114040000	0.339588	2.4699e-14	2.39;2.41;2.7;2.93;3.3;3.03;3.33;2.52;3.7	1.06;1.15;1.49;1.63;1.69;1.78;1.81;1.31;2.2	1.32;1.25;1.2;1.29;1.6;1.24;1.52;1.21;1.49	ENSSSCG00000002451	RIN3	5.7	0.77	1.07	7.3167e-15
Liver-restricted TAD boundary	8	12620000	12860000	0.236756	1.95058e-05	2.39;1.65;1.32;1.07;0.88;1.28;1.52;1.32;0.94;0.94;0.86;0.9	0.97;0.84;0.74;0.85;0.42;0.88;0.96;0.53;0.26;0.8;0.54;0.76	1.42;0.8;0.58;0.22;0.46;0.4;0.56;0.78;0.68;0.14;0.32;0.14	ENSSSCG00000008747;ENSSSCG00000026232;ENSSSCG00000029989;ENSSSCG00000040393	NCAPG;FAM184B;MED28;DCAF16	89.97;0.09;124.15;2.51	3.55;4.72;128.59;12.49	3.42;5.57;0.12;2.37	4.61030887393777e-08;6.86512223213665e-38;0.474600920803199;9.74027558282874e-06
Liver-restricted TAD boundary	8	17180000	17320000	0.24586	6.47372e-15	-1.01;-1.03;-1.15;-1.24;-1.32;-1.61;-1.59	0.87;0.86;0.94;0.77;0.72;0.57;0.68	2.12;2.1;1.91;1.98;1.96;1.81;1.73	-	-	-	-	-	-
Liver-restricted TAD boundary	8	17420000	17560000	0.24586	6.47372e-15	-1.93;-0.15;-0.57;0.99;0.94;-0.95;-1.64	0.69;0.44;0.49;0.6;0.49;0.81;0.81	1.37;1.41;0.94;0.39;0.45;0.24;1.54	-	-	-	-	-	-
Liver-restricted TAD boundary	8	19020000	19200000	0.257393	7.981e-13	2.13;2.05;2.27;2.33;2.75;2.77;2.57;2.74;3.08	0.54;0.51;0.69;0.57;1.2;0.98;0.71;0.66;1.5	1.59;1.53;1.58;1.75;1.54;1.78;1.85;2.08;1.58	ENSSSCG00000025315	SEPSECS	137.06	8.98	2.16	1.24809e-82
Liver-restricted TAD boundary	8	115200000	115340000	0.216973	3.68618e-06	-1.12;-1.4;-1.78;-1.92;-0.53;-0.73;-2.94	0.13;0.06;0.23;0.35;0.25;0.37;0.41	2.75;2.67;2.45;2.43;1.73;1.65;2.65	-	-	-	-	-	-
Liver-restricted TAD boundary	8	132980000	133120000	0.238079	3.57992e-11	0.46;0.88;-0.42;-1.85;-1.7;-1.6;-0.5	0.85;0.48;0.15;0.15;0.07;0.04;0.29	1.32;1.37;1.73;2.3;2.38;2.35;1.79	-	-	-	-	-	-
Liver-restricted TAD boundary	9	41120000	41260000	0.268838	9.88004e-10	0.29;0.35;0.43;0.51;0.57;0.7;0.32	1.93;1.9;1.82;1.85;1.8;1.65;1.72	1.63;1.54;1.38;1.33;1.22;0.95;1.39	ENSSSCG00000015048	DRD2	0.02	4.11	7.47	4.37433e-07
Liver-restricted TAD boundary	9	91500000	91680000	0.27777	1.11368e-05	1.59;1.66;1.93;2.37;2.59;2.07;1.79;1.85;2.3	0.21;0.02;0;0.88;0.99;0.18;0.5;0.8;0.26	1.38;1.63;1.94;1.48;1.59;2.25;2.3;2.65;2.03	ENSSSCG00000015383;ENSSSCG00000015384;ENSSSCG00000020970	RAPGEF5;TOMM7;IL6	47.24;558.75;0.87	92.43;104.69;0.4	0.98;1.62;0.72	2.91482158653678e-06;9.59045598648773e-37;0.215065000859809
Liver-restricted TAD boundary	9	108520000	108660000	0.23218	9.66244e-05	-1.52;-1.86;-0.33;-0.79;0.48;-1.43;0.5	-1.43;-1.76;-0.58;-0.94;0.22;-1.14;0.27	0.08;0.1;0.24;0.14;0.7;0.29;0.78	ENSSSCG00000024028	STARD3NL	31.67	44.71	0.47	0.0443234
Liver-restricted TAD boundary	9	111400000	111540000	0.230524	6.68933e-08	-2.61;-2.75;-2.74;-2.78;-2.89;-2.77;-2.69	-0.02;-0.08;-0.25;-0.28;-0.54;-0.29;-0.05	1.41;1.32;1.51;1.5;1.65;1.51;1.35	ENSSSCG00000049521	Unknown	0.71	2.47	1.73	1.35194e-06
Liver-restricted TAD boundary	9	117340000	117520000	0.225687	3.73629e-15	0;0.03;0.21;0.43;0.61;0.7;0.83;0.77;0.66	0.19;0.16;0;0.03;0.19;0.44;0.34;0.24;0.38	0.18;0.19;0.22;0.4;0.41;0.26;0.48;0.52;0.28	-	-	-	-	-	-
Liver-restricted TAD boundary	10	880000	1160000	0.211875	1.97889e-14	-0.49;-0.43;-0.14;-1.61;-1.42;-1.23;-1.03;-1.35;-1.47;-1.8;-0.03;-0.25;-0.25;-1.16	1.2;1.38;1.28;1.2;0.92;0.99;1.03;1.37;1.19;1.14;0.91;1.03;1.12;0.92	2.72;2.95;3.14;3.59;3.51;3.76;4.01;4.03;3.72;3.34;2.89;2.78;2.88;3.76	ENSSSCG00000032416;ENSSSCG00000037241;ENSSSCG00000040300	RGS1;RGS2;RGS13	21.61;29.68;1.06	7.08;29.46;1.17	0.39;0.09;0.15	0.0055147940196602;0.817195788101067;0.812483522193867
Liver-restricted TAD boundary	10	4640000	4820000	0.222172	2.17813e-07	-2.58;-2.53;-2.35;-2.2;-2.18;-2.03;-2.16;-3.91;-2.31	0.53;0.35;0.26;0.38;0.18;0.31;0.36;0.55;0.35	2.89;3.12;3.38;3.42;3.63;3.65;3.48;3.54;3.34	-	-	-	-	-	-
Liver-restricted TAD boundary	10	12300000	12440000	0.329396	1.40452e-09	0.64;0.47;0.3;0.13;0.22;0.51;0.59	1.33;1.3;1.28;1.44;1.55;2.01;1.42	1.98;1.77;1.58;1.57;1.33;1.5;2.02	ENSSSCG00000010840;ENSSSCG00000025686;ENSSSCG00000028178	RGS7;KMO;FH	16.65;280.12;312.32	130.85;2.47;68.01	2.99;5.26;0.16	1.96893996410793e-48;9.20112258189915e-154;3.23005839273998e-16
Liver-restricted TAD boundary	10	31740000	31920000	0.284235	3.98042e-16	1.99;1.88;1.9;2.06;2.08;2.27;2.36;2.28;2.3	-1.19;-1.09;-1.22;-1.4;-1.07;-2.7;-2.67;-2.52;-2.67	4.8;4.79;4.68;4.67;5.02;5.58;5.69;5.77;5.64	-	-	-	-	-	-
Liver-restricted TAD boundary	10	33800000	33940000	0.284583	8.36657e-15	1.8;2.65;3.26;3.1;2.83;3.02;1.49	-2.51;-1.08;-1.15;-2.95;-1.07;-2.93;-2.2	5.29;5.57;6.12;6.15;5.77;6.1;5.29	ENSSSCG00000011004;ENSSSCG00000030408	TOPORS;DDX58	60.56;109.72	19.4;45.41	0.36;0.71	1.88124590849121e-10;0.276058120889972
Liver-restricted TAD boundary	10	47460000	47640000	0.202866	1.8695e-14	1.06;1.09;1.11;1.18;1.17;1.25;1.24;1.29;1.33	0.35;0.33;0.25;0.3;0.1;0.05;0.15;0.11;0.11	1.42;1.42;1.37;1.48;1.28;1.3;1.08;1.18;1.44	-	-	-	-	-	-
Liver-restricted TAD boundary	10	61280000	61460000	0.251086	7.22697e-10	-1.64;-1.46;-1.25;-1.09;-2.96;-2.88;-2.81;-2.73;-1.31	-0.13;-1.99;-1.8;-1.61;-1.46;-1.62;-1.54;-1.32;-1.71	0.49;0.53;0.55;0.52;0.5;0.74;0.73;0.59;0.4	-	-	-	-	-	-
Liver-restricted TAD boundary	11	3000000	3140000	0.3407	5.31673e-06	2.54;2.62;2.36;2.4;2.12;2.23;2.54	2.68;2.91;2.48;2.67;2.52;2.93;2.42	0.13;0.29;0.12;0.27;0.4;0.7;0.12	ENSSSCG00000009293;ENSSSCG00000022678	SPATA13;AMER2	19.32;0.07	11.29;26.76	0.65;8.37	0.00403855706799012;4.25791753173465e-47
Liver-restricted TAD boundary	11	23720000	23900000	0.229363	3.43983e-18	0.48;0.41;0.51;0.58;0.52;0.61;0.61;0.58;0.67	0.18;0.02;0.06;0.09;0.17;0.26;0.1;0.33;0.17	0.29;0.38;0.45;0.68;0.69;0.87;0.71;0.24;0.84	-	-	-	-	-	-
Liver-restricted TAD boundary	11	24280000	24500000	0.229363	3.43983e-18	0.67;0.82;0.64;0.66;0.74;1.05;1.17;1.5;1.72;2.14;0.61	0.17;0.4;0.45;0.25;0.28;0.65;0.62;0.65;1.01;1.42;0.38	0.49;0.42;0.19;0.41;0.46;0.4;0.55;0.85;0.7;0.72;0.22	ENSSSCG00000009428	FAM216B	7.66	7.61	0.02	0.958766
Liver-restricted TAD boundary	11	51360000	51500000	0.254198	3.01582e-12	2.34;2.8;2.39;2.12;2.6;3.03;2.43	1.92;2.54;1.39;0.62;0.49;1.58;2.09	0.41;0.26;0.99;1.5;2.1;1.44;0.34	ENSSSCG00000009479;ENSSSCG00000009480	RBM26;NDFIP2	77.47;310.06	57.37;169.88	0.48;0.71	0.00131561168938332;0.0073211025371486
Liver-restricted TAD boundary	12	7160000	7340000	0.205058	3.10501e-14	-1.92;-1.95;-1.86;-1.92;-0.2;-0.25;-0.24;-0.46;-0.1	-0.21;-0.14;-0.34;-0.44;-0.5;-0.54;-0.11;-0.53;-0.36	0.28;0.18;0.48;0.52;0.29;0.29;0.13;0.06;0.25	-	-	-	-	-	-
Liver-restricted TAD boundary	12	7920000	8060000	0.215852	2.79015e-14	-1.93;-1.59;-1.59;-1.27;-1.08;-2.98;-1.51	-0.76;-0.62;-0.53;-0.4;-0.33;-0.23;-0.59	0.83;1.03;0.94;1.12;1.24;1.24;1.08	-	-	-	-	-	-
Liver-restricted TAD boundary	12	49340000	49480000	0.244043	5.79797e-05	-5.03;-4.65;-4.8;-4.96;0;0;-4.86	-5.51;-4.56;-4.5;-4.73;0;0;-4.6	0.47;0.08;0.29;0.22;0;0;0.26	ENSSSCG00000031932;ENSSSCG00000036211;ENSSSCG00000047874	OR3A1;OR3A2;OR1A1	0.04;0.05;0.06	0.03;0;0	-;-;-	-;-;-
Liver-restricted TAD boundary	13	5500000	5680000	0.200309	4.91119e-07	-1.12;-2.95;-2.89;-2.75;-2.46;-2.4;-2.46;-1.23;-2.48	-1.37;-1.47;-1.27;-1.48;-1.04;-1.03;-1.17;-1.58;-1.17	0.25;0.51;0.38;0.72;0.57;0.62;0.71;0.34;0.69	-	-	-	-	-	-
Liver-restricted TAD boundary	13	62820000	63000000	0.225338	7.56007e-10	-2.46;-2.52;-2.61;-2.55;-2.71;-2.8;-2.98;-1.03;-2.52	-2.98;-2.94;-2.87;-2.97;-3;-2.92;-2.86;-2.78;-2.76	0.51;0.41;0.25;0.41;0.29;0.11;0.12;0.24;0.23	-	-	-	-	-	-
Liver-restricted TAD boundary	13	112060000	112240000	0.316643	8.61981e-14	-3.5;-3.39;-3.45;-3.51;-3.49;-3.47;-3.48;-3.52;-3.5	-0.47;-0.47;-0.82;-0.76;-0.72;-0.49;-0.59;-0.59;-0.57	2.97;3.08;3.36;3.25;3.23;3.02;3.1;3.06;3.07	-	-	-	-	-	-
Liver-restricted TAD boundary	13	130140000	130320000	0.252504	1.3053e-13	-1.69;-1.71;-1.61;-1.53;-1.51;-1.55;-1.91;-1.9;-1.7	-1.63;-1.68;-1.63;-1.74;-1.92;-1.88;-0.08;-1.66;-0.12	0.05;0.03;0.01;0.21;0.4;0.32;0.17;0.23;0.41	ENSSSCG00000036094;ENSSSCG00000048327	PLAAT1;Unknown	1.46;1.04	4.34;1.94	1.47;0.8	6.93047632305257e-06;0.0871175027830968
Liver-restricted TAD boundary	13	137460000	137640000	0.229038	4.13614e-16	3.75;3.66;3.76;3.48;3.41;3.43;3.31;3.75;3.43	1.9;2.1;1.9;1.79;1.65;1.19;1.13;2.13;1.48	1.85;1.56;1.85;1.68;1.75;2.23;2.17;1.61;1.94	-	-	-	-	-	-
Liver-restricted TAD boundary	13	148320000	148460000	0.207836	2.27427e-11	-0.57;-0.6;-0.64;-0.69;-0.92;0.73;-0.59	-1.43;-1.64;-1.57;-1.67;-1.84;-0.47;-1.43	1.14;0.95;1.06;1.02;1.08;0.79;1.16	-	-	-	-	-	-
Liver-restricted TAD boundary	14	3680000	3860000	0.246291	0.000546173	-4.95;-4.69;-4.65;-4.53;-4.66;-4.78;-4.85;-4.83;-4.94	-2.47;-2.52;-2.32;-2.39;-2.52;-2.75;-2.48;-2.63;-2.7	1.52;1.83;1.67;1.85;1.85;1.96;1.62;1.79;1.76	-	-	-	-	-	-
Liver-restricted TAD boundary	14	26220000	26400000	0.292117	3.39975e-13	-1.36;-1.19;-2.85;-2.7;-2.66;-2.42;-2.26;-2.05;-2.32	0.67;0.67;0.72;-0.92;-0.89;-0.85;-0.62;-0.67;-0.71	1.96;2.14;2.43;2.21;2.23;2.42;2.36;2.62;2.39	-	-	-	-	-	-
Liver-restricted TAD boundary	14	27780000	27960000	0.292117	3.39975e-13	-2.19;-2.31;-2.55;-1.04;-1.27;-1.42;-1.55;-2.13;-1.34	0.69;0.4;0.23;0.08;0.12;0;0.31;0.55;0.06	3.11;3.29;3.22;2.88;2.61;2.59;2.14;3.32;2.59	-	-	-	-	-	-
Liver-restricted TAD boundary	14	58340000	58520000	0.217287	1.66471e-16	0.06;0.09;0.05;0.14;0.09;0.33;0.37;0.33;0.26	1.52;1.46;1.28;1.41;1.43;1.51;1.34;1.25;1.38	1.46;1.55;1.34;1.55;1.52;1.84;1.72;1.58;1.65	-	-	-	-	-	-
Liver-restricted TAD boundary	14	69800000	69980000	0.204463	7.34554e-09	-4.32;-4.24;-4.32;-4.48;-4.57;-4.71;-4.83;-4.98;-4.41	-3.28;-3.26;-3.31;-3.16;-3.18;-3.36;-3.22;-3.37;-3.11	0.96;1.02;0.99;0.67;0.6;0.64;0.38;0.39;0.7	-	-	-	-	-	-
Liver-restricted TAD boundary	14	93440000	93620000	0.204414	5.25375e-12	-4.39;-4.5;-4.56;-4.63;-4.51;-4.54;-4.53;-4.37;-4.58	-3.52;-3.45;-3.46;-3.49;-3.52;-3.54;-3.64;-3.29;-3.53	1.13;0.94;0.9;0.86;1.01;0.99;1.1;0.91;0.95	-	-	-	-	-	-
Liver-restricted TAD boundary	14	93800000	93980000	0.204414	5.25375e-12	-4.34;-4.34;-4.36;-4.49;-4.58;-4.53;-4.73;-4.42;-4.65	-3.48;-3.41;-3.57;-3.43;-3.46;-3.49;-3.6;-3.57;-3.68	1.14;1.06;1.2;0.94;0.87;0.95;0.86;1.15;1.03	ENSSSCG00000044100	Unknown	0.92	3.34	1.76	2.47451e-06
Liver-restricted TAD boundary	14	94520000	94660000	0.204414	5.25375e-12	-4.53;-4.73;-4.75;-4.94;-3.12;-3.11;-4.94	-3.51;-3.62;-3.43;-3.83;-3.79;-3.65;-3.58	0.98;0.88;0.67;0.88;0.66;0.53;0.63	-	-	-	-	-	-
Liver-restricted TAD boundary	14	101320000	101460000	0.209383	5.38084e-12	0.89;0.8;0.94;0.68;0.55;0.48;0.56	-1.88;-0.05;-0.37;-0.52;-0.26;-0.3;-0.36	3.02;2.75;2.58;2.17;2.3;2.19;2.2	ENSSSCG00000010455	SLC16A12	206.69	4.44	4.42	3.4523e-57
Liver-restricted TAD boundary	14	109260000	109400000	0.234311	1.24926e-13	0.52;0.44;0.24;0.31;0.28;0.49;0.29	0.85;-0.77;-0.62;-0.46;-0.57;0.81;-0.69	1.38;1.67;1.63;1.85;1.71;1.31;1.6	ENSSSCG00000010530	CRTAC1	1.99	41.94	4.01	3.57707e-10
Liver-restricted TAD boundary	14	122000000	122180000	0.244079	2.52747e-09	-1.57;-1.19;-1.08;-2.92;-2.82;-2.78;-2.8;-1.38;-2.85	-1.83;-1.78;-1.75;-1.67;-1.74;-1.6;-1.79;-1.86;-1.71	0.25;0.58;0.67;0.74;0.92;0.81;0.99;0.48;0.85	-	-	-	-	-	-
Liver-restricted TAD boundary	14	134480000	134660000	0.274114	3.23094e-14	2.54;2.01;1.69;1.39;1.14;0.98;0.84;0.52;0.86	3.19;3.11;2.7;2.51;2.56;2.6;2.55;2.37;2.48	0.64;1.09;1.01;1.11;1.41;1.62;1.7;1.85;1.62	ENSSSCG00000010739;ENSSSCG00000045428	CTBP2;Unknown	12.64;0	16.43;0	0.39;-	0.0271735708685381;-
Liver-restricted TAD boundary	14	138280000	138460000	0.267729	5.05754e-16	0.18;0.13;0.11;0.19;0.53;0.86;1.33;0.41;0.56	1.54;1.4;1.54;1.51;1.81;1.6;1.86;1.38;1.65	1.73;1.54;1.43;1.32;1.28;0.73;0.53;1.79;1.08	-	-	-	-	-	-
Liver-restricted TAD boundary	15	18680000	18820000	0.21597	3.50911e-16	0.38;0.4;0.54;0.78;0.88;0.64;0.52	0.98;1.17;1.08;0.85;0.84;1.08;1.13	1.36;1.58;1.63;1.64;1.73;1.73;1.65	ENSSSCG00000023479	NCKAP5	1.75	29.85	3.82	1.00445e-29
Liver-restricted TAD boundary	15	50520000	50700000	0.209638	6.33942e-15	-0.11;-1.94;-1.63;-1.43;-1.34;-1.24;-1.29;-1.13;-1.57	0.96;-0.94;-0.79;-0.7;-0.76;-0.9;-0.86;-0.83;0.99	0.93;0.99;1.16;1.27;1.42;1.66;1.56;1.69;1.43	ENSSSCG00000048163	Unknown	0.01	0.11	-	-
Liver-restricted TAD boundary	15	66980000	67120000	0.248464	2.98988e-14	1.38;1.41;1.26;1.09;1.02;0.96;0.92	0.03;0.47;0.08;0.04;0.38;0.45;0.6	1.35;0.93;1.18;1.13;1.4;1.41;1.53	ENSSSCG00000015885	PLA2R1	12.9	16.67	0.42	0.303084
Liver-restricted TAD boundary	15	69500000	69640000	0.315061	1.05452e-12	-3.62;-3.6;-3.7;-3.83;-2.54;-2.72;-2.11	-1.86;-2;-0.36;-0.01;-1.92;-1.82;-1.76	2.24;2.4;2.66;2.18;1.37;1.1;1.65	ENSSSCG00000015898	KCNH7	0.03	75.36	12.05	1.35253e-80
Liver-restricted TAD boundary	15	111800000	111980000	0.219767	6.88327e-06	-2.16;-2.12;-2.29;-2.42;-2.75;-2.84;-2.76;-3.86;-2.78	-1.01;-1.13;-1.27;-1.4;-1.8;-1.79;-1.66;-2.95;-1.67	0.85;1;0.98;0.98;1.04;0.95;0.89;1.08;0.89	ENSSSCG00000038814;ENSSSCG00000045276;ENSSSCG00000051711	Unknown;Unknown;Unknown	0;0.14;0.75	0.11;0.22;1.55	-;-;0.77	-;-;0.122928965722654
Liver-restricted TAD boundary	15	113440000	113580000	0.418632	2.00802e-09	-0.03;-1.82;-1.47;-2.38;-2.52;-2.6;-2.88	-1.99;-1.96;-1.99;-0.15;-0.14;-1.98;-0.03	0.04;0.13;0.51;1.77;1.61;1.37;1.14	-	-	-	-	-	-
Liver-restricted TAD boundary	16	17540000	17680000	0.223061	2.19348e-09	-0.01;-0.02;-0.11;-0.39;-0.68;-0.7;-0.1	0.05;0.55;0.51;0.71;0.88;-0.89;0.43	1.93;1.43;1.37;0.89;0.44;0.19;1.46	-	-	-	-	-	-
Liver-restricted TAD boundary	16	72440000	72620000	0.26719	3.26706e-12	-0.72;-0.46;-1.85;-1.68;-1.71;-1.73;-1.79;-0.18;-1.86	0.36;0.61;0.97;-0.93;0.77;0.7;0.88;0.87;0.85	0.91;0.92;1.18;1.24;1.52;1.57;1.32;0.94;1.29	ENSSSCG00000017095	SEMA5A	3.15	43.7	3.77	1.47033e-88
Liver-restricted TAD boundary	17	15460000	15600000	0.240921	1.14953e-07	-4.73;-4.61;-4.82;-3.07;-3.2;-4.45;-3.47	-4.99;-3.09;-3.19;-3.35;-3.47;-4.99;-3.37	0.26;0.48;0.37;0.27;0.26;0.54;0.09	-	-	-	-	-	-
Liver-restricted TAD boundary	17	28300000	28440000	0.297799	6.0178e-11	0.49;0.52;0.81;0.92;1.05;1.12;0.58	0.08;0.4;0.55;0.65;0.72;0.87;0.22	0.41;0.11;0.26;0.26;0.32;0.24;0.35	-	-	-	-	-	-
Liver-restricted TAD boundary	17	60320000	60500000	0.348011	3.3747e-12	-0.89;-0.71;-0.74;-0.43;-0.5;-0.25;-0.2;-0.08;-0.42	1.56;1.48;1.34;1.5;1.53;1.38;1.4;1.13;1.38	2.67;2.78;2.61;3.08;3.03;3.14;3.2;3.05;2.97	-	-	-	-	-	-
Liver-restricted TAD boundary	17	60540000	60720000	0.348011	3.3747e-12	-1.86;-1.57;-1.82;-1.83;-1.89;-1.94;-0.11;-0.04;-0.11	1.1;1.19;1.24;1.16;1.31;1.34;1.47;1.09;1.39	3.24;3.62;3.43;3.34;3.43;3.41;3.37;3.05;3.29	-	-	-	-	-	-
Liver-restricted TAD boundary	17	62220000	62400000	0.247416	4.08672e-06	3.94;4.19;4.34;4.45;4.36;4.4;4.51;4.19;4.21	3.69;4.09;3.98;4.11;3.99;4.28;4.37;3.82;3.82	0.24;0.09;0.35;0.34;0.37;0.12;0.14;0.37;0.39	ENSSSCG00000032235;ENSSSCG00000036109;ENSSSCG00000036544;ENSSSCG00000037260;ENSSSCG00000040086;ENSSSCG00000043262	ARFGAP1;Unknown;NKAIN4;Unknown;YTHDF1;BIRC7	53.51;0.14;0.79;0.11;9.05;0.02	44.82;0.02;9.59;0.45;12.32;0.04	0.15;-;3.85;-;0.53;-	0.520170522025138;-;6.01625653753121e-17;-;0.0814750192263235;-
Liver-restricted TAD boundary	17	62400000	62580000	0.247416	4.08672e-06	4.13;4.2;4.2;4.13;4.24;4.14;4.29;4.11;4.23	3.61;3.7;3.51;3.69;3.4;3.59;3.76;3.71;3.93	0.52;0.49;0.69;0.43;0.83;0.54;0.53;0.4;0.3	ENSSSCG00000031474;ENSSSCG00000031746;ENSSSCG00000036706;ENSSSCG00000038651;ENSSSCG00000039677;ENSSSCG00000040118;ENSSSCG00000040401	PTK6;KCNQ2;SRMS;FNDC11;CHRNA4;PPDPF;EEF1A2	0.28;0.03;0.13;0.02;0.04;76.66;0.36	0.19;64.64;0.04;0.07;2.71;38.72;498.96	-;12.3;-;-;6.2;0.82;11.87	-;2.12331129347582e-88;-;-;2.97986504451402e-33;0.0304374092645009;2.37073985453251e-117
Liver-restricted TAD boundary	18	44340000	44480000	0.236243	1.96179e-12	0.6;-0.43;-0.28;-0.44;-0.64;-0.87;-0.55	0.77;1.01;0.78;0.83;0.85;1.07;0.82	1.37;2.59;2.51;2.39;2.22;2.2;2.28	-	-	-	-	-	-
Brain-restricted TAD boundary	1	4800000	4960000	-0.444711	2.69328e-10	4.07;3.96;3.66;3.82;3.39;3.29;2.85;3.84	2.09;2.07;1.59;2;2.29;2.54;2.01;2	1.98;1.88;2.06;1.81;1.1;0.75;0.84;1.84	ENSSSCG00000004029	QKI	188.26	468.52	1.3	1.07286e-06
Brain-restricted TAD boundary	1	7340000	7480000	-0.252774	1.99209e-10	4.99;5.15;4.98;5.58;5.73;5.79;4.37	3.51;3.88;3.63;4;3.94;4.36;2.51	1.47;1.26;1.35;1.58;1.79;1.43;1.86	ENSSSCG00000004041;ENSSSCG00000004044	SLC22A1;IGF2R	227.72;25.51	0.04;12.27	12.95;0.96	1.46487762019147e-48;7.25136408067468e-05
Brain-restricted TAD boundary	1	44660000	44800000	-0.20738	3.42513e-10	-0.38;-0.75;0.83;0.43;0.65;0.73;-0.53	-1.95;-0.37;-0.56;-1.99;-1.99;-1.83;-0.12	0.43;0.37;0.6;1.58;1.35;1.44;0.41	-	-	-	-	-	-
Brain-restricted TAD boundary	1	48740000	48960000	-0.200962	2.97438e-09	-2.59;-2.61;-2.7;-2.84;-2.91;-2.9;-2.96;-2.92;-1.02;-2.54;-2.94	-0.66;-0.75;-0.88;0.47;0.71;0.53;0.15;0.31;0.28;-0.37;0.04	2.07;2.13;2.17;2.68;2.38;2.57;2.88;2.76;2.7;1.83;3.1	ENSSSCG00000004270	ADGRB3	0.19	89.7	8.66	1.39132e-66
Brain-restricted TAD boundary	1	82120000	82260000	-0.33047	4.39845e-07	0.4;0.41;0.62;0.34;0.62;0.58;0.22	0.33;0.52;0.87;-0.27;-1.43;-1.29;0.52	0.07;0.11;0.25;1.39;1.94;2.12;0.75	ENSSSCG00000004445;ENSSSCG00000004446;ENSSSCG00000023415;ENSSSCG00000025656;ENSSSCG00000040660	CALHM4;RWDD1;SULT1A3;SULT1A3;TRAPPC3L	0.06;95.44;2566.46;2.95;0.23	0.22;22.18;2.18;0;0.18	-;1.86;9.84;5.2;-	-;6.79288148219552e-28;2.84705347246115e-206;5.75956555164482e-06;-
Brain-restricted TAD boundary	1	236400000	236540000	-0.212532	4.95105e-07	5.16;4.9;4.95;4.69;4.78;4.97;5.08	3.99;4;4.2;3.72;4.02;4.48;4.19	1.17;0.89;0.74;0.96;0.75;0.49;0.88	ENSSSCG00000005316;ENSSSCG00000005317;ENSSSCG00000005318;ENSSSCG00000005319;ENSSSCG00000005320;ENSSSCG00000005322;ENSSSCG00000025842;ENSSSCG00000038905	TPM2;TLN1;CREB3;GBA2;RGP1;NPR2;SPAG8;MSMP	84.71;95.25;106.09;67.24;4.36;4.47;92.78;0.13	12.14;33.21;59.22;41.17;8.7;13.84;18.71;0.04	1.11;0.45;0.78;0.57;1.12;1.59;1.9;-	4.00640082059949e-44;1.31287833867037e-10;0.000714172916386726;0.0157825511391912;5.6573222046529e-06;2.6266390476636e-13;5.4090201632881e-15;-
Brain-restricted TAD boundary	1	273720000	273860000	-0.237765	3.28129e-05	3.48;3.56;3.59;3.32;3.41;3.52;3.1	2.52;2.5;2.54;2.26;2.03;2.26;1.95	0.96;1.05;1.05;1.06;1.38;1.25;1.15	-	-	-	-	-	-
Brain-restricted TAD boundary	2	47520000	47660000	-0.204739	4.74331e-05	1.98;2.05;1.48;1.17;0.48;0.75;1.95	2.85;2.88;2.64;1.64;0.25;0.87;3.01	0.86;0.82;1.16;0.47;0.23;0.12;1.06	ENSSSCG00000013402;ENSSSCG00000031143	USP47;CCNE1	99.53;0.26	68.24;4.17	0.62;4.37	0.00532991015367859;0.0150820760531519
Brain-restricted TAD boundary	2	56600000	56740000	-0.207268	2.01897e-10	-4.08;-5.9;-4.08;-4.01;-4.21;-4.22;-6	-3.95;-3.89;-3.92;-3.85;-2.15;-2.09;-3.78	1.87;1.99;1.84;1.83;1.94;1.86;1.78	ENSSSCG00000013944;ENSSSCG00000013945;ENSSSCG00000031624;ENSSSCG00000045699	OR2G3;OR2G2;Unknown;Unknown	0.01;0.04;0;0.31	0;0;0;0.51	-;-;-;0.75	-;-;-;0.0641897764865853
Brain-restricted TAD boundary	2	57920000	58140000	-0.207268	2.01897e-10	-3.92;-3.45;-3.33;-4.89;-4.78;-4.71;-4.65;-4.69;-4.78;-2.82;-4.69	-1.07;-2.45;-2.29;-3.98;-3.79;-3.66;-3.92;-3.9;-3.9;-0.06;-3.73	1.15;0.99;0.96;1.09;1.01;0.95;1.27;1.21;1.12;1.24;1.04	ENSSSCG00000033438;ENSSSCG00000038707;ENSSSCG00000043984;ENSSSCG00000049001	OR2Y1;Unknown;Unknown;Unknown	0;0;0.54;0.02	0;0;1.78;0.03	-;-;1.5;-	-;-;2.81638996476715e-06;-
Brain-restricted TAD boundary	2	131760000	131900000	-0.251641	1.06676e-12	-2.57;-2.48;-2.32;-2.56;-2.75;-2.34;-2.86	-2.6;-2.61;-2.57;-2.73;-1.35;-2.72;-1.21	0.03;0.13;0.24;0.17;0.6;0.37;0.35	ENSSSCG00000014258	ISOC1	166.78	33.74	1.8	3.36766e-22
Brain-restricted TAD boundary	3	6540000	6680000	-0.414438	6.10505e-13	1.8;1.47;1.23;0.81;0.69;0.57;1.75	3.38;2.76;1.67;0.95;0.6;0.37;3.46	1.57;1.28;0.43;0.13;0.09;0.19;1.71	ENSSSCG00000023320;ENSSSCG00000039842;ENSSSCG00000043842	CYP3A29;ZSCAN25;TMEM225B	116.32;3.89;0.53	3.27;6.49;1.74	4.99;0.83;1.83	2.38597474811682e-38;0.000683498523989;2.68051218676952e-11
Brain-restricted TAD boundary	3	34420000	34600000	-0.262246	5.59958e-10	-2.21;-2.16;-4;-4;-3.92;-3.97;-3.92;-3.93;-2.12	-0.21;-0.06;-0.16;-0.47;-0.09;-0.26;-0.12;-0.12;-0.14	1.99;1.9;2.16;2.47;2.16;2.28;2.19;2.18;2.02	-	-	-	-	-	-
Brain-restricted TAD boundary	3	35260000	35440000	-0.262246	5.59958e-10	-2.36;-2.32;-2.49;-2.36;-2.28;-2.24;-2.18;-2.03;-2.15	-0.32;-0.5;-0.56;-0.58;-0.73;-0.5;-0.16;-0.31;-0.22	1.96;2.18;2.07;2.21;2.45;2.26;1.98;2.27;2.07	-	-	-	-	-	-
Brain-restricted TAD boundary	3	35500000	35680000	-0.262246	5.59958e-10	-3.98;-3.9;-2.01;-4;-3.92;-3.94;-3.93;-2.07;-3.9	-0.22;-0.16;-0.13;-0.21;-0.38;-0.32;-0.37;-0.11;-0.3	2.23;2.25;2.11;2.2;2.45;2.38;2.43;2.04;2.4	-	-	-	-	-	-
Brain-restricted TAD boundary	3	64660000	64800000	-0.234191	3.73256e-09	-5.54;-5.6;-5.67;-5.77;-4.13;-4.11;-5.96	-2.83;-2.73;-2.73;-2.85;-2.68;-2.64;-2.88	3.28;3.12;3.06;3.08;2.55;2.52;2.92	ENSSSCG00000037620	REG1B	0.56	1.19	0.95	0.0339696
Brain-restricted TAD boundary	3	79060000	79200000	-0.271112	1.04494e-12	0.67;0.56;0.48;0.38;0.15;0.56;0.17	-0.85;-0.89;-0.97;0.9;0.58;0.39;0.31	0.48;0.54;0.54;0.51;0.42;0.95;0.49	-	-	-	-	-	-
Brain-restricted TAD boundary	3	122620000	122800000	-0.202082	1.04344e-10	-4.84;-3.23;-3.26;-3.63;-3.58;-3.3;-3.35;-4.94;-3.16	-2.65;-2.58;-2.6;-1.41;-1.24;-2.63;-2.57;-2.36;-2.85	1.81;1.35;1.33;1.77;1.66;1.32;1.21;1.41;1.68	ENSSSCG00000008664;ENSSSCG00000043944	LRATD1;Unknown	5.29;1.48	51.2;4.4	3.18;1.38	5.34390147028632e-14;3.9738854249095e-06
Brain-restricted TAD boundary	3	129720000	129880000	-0.247936	1.9019e-12	-2.32;-2.64;-2.51;-2.4;-2.28;-2.19;-2.17;-2.71	-0.03;-0.17;0.89;-0.7;-0.15;-1.91;-1.77;-0.26	1.7;1.53;2.59;2.3;1.87;1.71;1.6;1.55	ENSSSCG00000008649;ENSSSCG00000047407	SOX11;Unknown	0.39;1.01	10.09;1.66	4.74;0.5	8.37768055132481e-45;0.373512422062249
Brain-restricted TAD boundary	4	340000	520000	-0.276794	0.000176024	5.22;5.19;4.7;4.6;5.15;4.95;4.79;4.79;5.06	3.33;2.95;2.62;2.71;2.98;2.62;2.82;2.51;2.69	1.89;2.23;2.08;1.89;2.16;2.33;1.97;2.28;2.36	ENSSSCG00000005904;ENSSSCG00000005905;ENSSSCG00000005907;ENSSSCG00000005908;ENSSSCG00000005909;ENSSSCG00000005910;ENSSSCG00000005917;ENSSSCG00000005918;ENSSSCG00000025116;ENSSSCG00000025879;ENSSSCG00000034551;ENSSSCG00000046182	VPS28;SLC39A4;ADCK5;SLC52A1;FBXL6;TMEM249;HSF1;DGAT1;TONSL;SCRT1;SCX;CPSF1	7.11;0.94;11.28;8.84;12.33;1.62;9.46;28.34;9.99;0;0.71;55.38	26.36;0.31;12.53;13.44;10.41;4.47;13.37;7.33;2.44;16.9;0.22;54.27	2.26;0.62;0.35;0.74;0.03;1.56;0.76;0.32;0.17;11.2;1.87;0.15	7.45812942491435e-36;0.128438050473407;0.258219346587854;0.0256786610368272;0.902811143991831;0.000160725145231069;0.0433641563163934;1.00655111201573e-15;1.61844059502936e-08;2.79093816761082e-24;0.0154449461712477;0.642453817792659
Brain-restricted TAD boundary	4	620000	820000	-0.276794	0.000176024	4.98;4.81;4.62;4.72;5.09;4.45;4.81;5.43;4.62;5.38	2.31;2.44;2.34;2.41;2.56;2.11;2.34;2.79;2.51;2.75	2.67;2.36;2.28;2.3;2.52;2.34;2.47;2.64;2.11;2.62	ENSSSCG00000005911;ENSSSCG00000005922;ENSSSCG00000005923;ENSSSCG00000005925;ENSSSCG00000032796;ENSSSCG00000038025;ENSSSCG00000038800;ENSSSCG00000039094	OPLAH;Unknown;SPATC1;EXOSC4;GRINA;NRBP2;PUF60;PLEC	30.09;0.31;0.05;40.02;30.68;3.17;80.08;18.56	5.68;0.65;1.3;18.01;118;31.3;73.88;31.59	1.91;1.27;6.52;0.98;2.24;3.41;0.04;0.81	8.12811073624258e-08;0.0860260558042015;2.54396582765981e-07;0.00345966225057583;1.17225220192831e-17;1.85750531178287e-80;0.829160596427339;0.0108507488503741
Brain-restricted TAD boundary	4	8020000	8180000	-0.209482	5.79192e-09	3.49;3.41;3.36;2.96;2.8;3.35;3.29;3.12	2.09;2.23;1.9;1.82;1.84;2.02;1.75;1.82	1.39;1.17;1.45;1.13;0.96;1.32;1.53;1.3	ENSSSCG00000005946	CCN4	1.9	3.56	0.92	0.0800281
Brain-restricted TAD boundary	4	11880000	12060000	-0.270807	2.19509e-16	1.42;1.4;1.46;1.45;1.46;1.49;1.69;1.42;1.72	0.63;0.5;0.55;0.59;0.74;0.52;0.52;0.58;0.68	0.79;0.9;0.91;0.85;0.72;0.96;1.17;0.83;1.03	-	-	-	-	-	-
Brain-restricted TAD boundary	4	20540000	20680000	-0.203481	3.54058e-11	0.37;0.05;0.21;0.64;1.37;1.61;0.3	0.48;0.36;0.15;0.45;1.14;0.91;0.61	0.1;0.31;0.36;0.19;0.23;0.7;0.3	ENSSSCG00000006009	EXT1	95.67	45.91	0.9	1.02057e-06
Brain-restricted TAD boundary	4	21880000	22060000	-0.233307	3.34473e-13	0.72;0.17;0.59;0.4;0.34;0.37;0.31;-0.95;0.5	0.55;0.39;1.26;0.86;0.69;0.61;0.58;0.61;0.66	0.17;0.56;0.66;0.46;0.34;0.24;0.26;0.43;0.15	ENSSSCG00000006016;ENSSSCG00000030493	EIF3H;UTP23	364.32;88.16	262.76;19.89	0.37;1.86	0.045266264076675;1.61269870773173e-22
Brain-restricted TAD boundary	4	40840000	41020000	-0.260742	3.8338e-11	-1.35;-1.38;-1.31;-1.29;-1.22;-1.13;-1.03;-2.99;-1.31	-1.82;-1.84;-1.86;-1.83;-1.66;-1.73;-1.96;-1.9;-1.92	0.46;0.46;0.54;0.54;0.43;0.6;0.93;0.9;0.61	-	-	-	-	-	-
Brain-restricted TAD boundary	4	90140000	90280000	-0.315816	3.20071e-08	3.38;3.47;3.63;3.39;3.27;3.29;3.4	1.72;1.86;2.26;1.88;1.8;2.26;1.62	1.65;1.61;1.37;1.5;1.46;1.02;1.77	ENSSSCG00000006385;ENSSSCG00000006386;ENSSSCG00000006388;ENSSSCG00000023091;ENSSSCG00000032164	NCSTN;COPA;DCAF8;PEX19;PEA15	51.34;211.68;135.19;186.45;48.55	52.42;143.65;72.62;99.76;591.11	0.13;0.5;0.86;0.81;3.7	0.45207753180873;0.00639321403705378;1.3777055836701e-09;1.79531295380553e-05;3.15385738017032e-66
Brain-restricted TAD boundary	5	30980000	31160000	-0.263744	1.16311e-11	-2.14;-2.15;-2.29;-2.32;-3.87;-3.75;-3.67;-3.73;-2.14	-1.08;-1.24;-1.44;-1.61;-1.16;-1.09;-1.27;-1.15;-1.38	0.93;1.09;1.15;1.28;1.28;1.33;1.59;1.42;1.23	ENSSSCG00000000478;ENSSSCG00000046465	GRIP1;Unknown	0.73;0.04	29.53;0.38	5.37;-	3.51847137743625e-67;-
Brain-restricted TAD boundary	5	40340000	40520000	-0.266816	8.40321e-10	-5.91;-4.47;-3.02;-3.1;-4.55;-4.45;-4.2;-4.21;-5.97	-2.75;-2.9;-1.29;-1.27;-2.42;-2.33;-2.32;-2.73;-2.4	2.84;2.43;2.26;2.17;1.87;1.88;2.12;2.52;2.42	ENSSSCG00000026719	ALG10B	47.95	36.15	0.38	0.126741
Brain-restricted TAD boundary	5	63100000	63280000	-0.291781	0.0256746	0.15;0.27;0.63;-0.44;-0.5;-0.62;-0.31;-0.36;-0.88	-0.3;-0.14;-1.25;-2.3;-2.35;-2.47;-3.82;-3.74;-2.51	1.86;1.58;2.12;2.13;2.15;2.14;2.48;2.61;2.36	ENSSSCG00000025179;ENSSSCG00000031242;ENSSSCG00000038418	NECAP1;CLEC4D;CLEC4E	54.88;1.15;2.32	205.68;1.54;0.05	1.92;0.43;5.29	1.31189704326762e-22;0.182190337270985;2.13824574577843e-06
Brain-restricted TAD boundary	5	63680000	63880000	-0.329755	1.81949e-08	4.09;4.5;4.5;4.82;4.88;4.6;5.18;4.86;4.38;4.94	2.52;3.61;4.09;4.2;5.06;4.54;6.26;6.14;3.49;5.21	1.57;0.89;0.4;0.62;0.18;0.06;1.08;1.27;0.88;0.27	ENSSSCG00000000679;ENSSSCG00000000682;ENSSSCG00000000683;ENSSSCG00000000684;ENSSSCG00000000685;ENSSSCG00000024655;ENSSSCG00000025117;ENSSSCG00000025460;ENSSSCG00000025537;ENSSSCG00000026812;ENSSSCG00000027205;ENSSSCG00000028373;ENSSSCG00000040186	LRRC23;GNB3;CDCA3;USP5;TPI1;PHB2;ATN1;SPSB2;PTPN6;EMG1;LPCAT3;ENO2;C12ORF57	3.88;0.13;41.36;67.71;403.19;538.62;2.35;38.1;46.41;107.26;58.61;2.59;204.03	2.48;1.18;3.45;85.26;556.49;49.82;33.35;1.83;7.52;20.75;32.91;421.31;64.02	0.51;3.64;2.61;0.33;0.69;2.61;3.79;3.73;1.45;1.64;0.64;7.55;0.36	0.440403988736604;1.83891126527001e-08;0.000273086769658099;0.13410672506279;0.00525562438900846;2.00503208958445e-39;2.52420887567964e-23;2.79609033276388e-38;5.21988765194047e-15;5.71490571649954e-24;0.00743459904628953;3.40376024285502e-274;2.90952264772465e-10
Brain-restricted TAD boundary	5	101560000	101720000	-0.278686	5.67964e-13	1.05;0.87;0.85;0.49;1.03;1.16;1.22;1.31	0.22;0.36;0.03;0.49;0.28;0.53;0.01;0.1	1.28;1.23;0.88;0.99;1.32;1.7;1.24;1.2	ENSSSCG00000036560	PAWR	73.62	11.04	1.33	9.54807e-22
Brain-restricted TAD boundary	6	56880000	57020000	-0.346481	4.1542e-05	0.02;0.01;0.09;0.43;0.85;0.26;1.28	0.26;0.24;0.17;0.38;1.23;0.26;1.77	0.28;0.26;0.07;0.05;0.37;0;0.48	ENSSSCG00000027741;ENSSSCG00000032978;ENSSSCG00000041243;ENSSSCG00000042660;ENSSSCG00000043639;ENSSSCG00000044698	ZNF835;Unknown;FRG2C;Unknown;Unknown;Unknown	14.09;7.37;0.05;0;0.01;5.32	16.78;16.02;0;0;0;4.88	0.23;1.11;-;-;-;0.02	0.0832659859985388;4.43485519280288e-06;-;-;-;0.97444326839516
Brain-restricted TAD boundary	6	76600000	76780000	-0.220662	2.82631e-09	1.12;1.13;1.16;1.32;1.23;1.29;1.19;1.1;1.15	2.08;1.91;2.03;1.95;2.16;2.19;2.26;2.18;2.06	0.95;0.78;0.86;0.63;0.92;0.9;1.07;1.08;0.91	ENSSSCG00000020992;ENSSSCG00000043698;ENSSSCG00000051351	IGSF21;Unknown;Unknown	0.15;0.08;1.28	89.94;1.12;4.24	9.35;4.08;1.86	4.90134863441579e-89;0.00193056073933086;0.00108734548058157
Brain-restricted TAD boundary	6	93660000	93800000	-0.20949	2.42186e-11	2.57;2.5;2.61;2.97;2.76;2.44;2.47	3.81;3.71;3.69;4.51;3.84;3.69;3.6	1.23;1.21;1.07;1.53;1.07;1.25;1.12	ENSSSCG00000032240;ENSSSCG00000032909;ENSSSCG00000039905	RSPO1;CDCA8;C1ORF109	0.7;36.2;23.61	1.1;1.94;10.98	0.59;3.93;0.87	0.279334987785059;7.20758568663203e-06;3.99107491377117e-09
Brain-restricted TAD boundary	6	111460000	111640000	-0.223916	5.13976e-11	-3.8;-3.71;-3.67;-3.61;-3.88;-3.83;-3.84;-3.73;-3.74	-1.66;-1.37;-1.59;-1.25;-1.19;-2.79;-2.74;-2.56;-1.27	1.85;1.66;1.92;1.64;1.3;0.96;0.9;0.83;1.53	-	-	-	-	-	-
Brain-restricted TAD boundary	7	23020000	23240000	-0.289813	2.00573e-13	4.05;3.76;3.37;3.83;3.9;3.91;4.31;4.1;4.49;4.2;3.51	2.77;2.77;2.51;3.34;3.19;3.38;3.99;3.49;3.9;3.78;2.67	1.27;0.99;0.85;0.48;0.7;0.52;0.32;0.61;0.58;0.42;0.84	ENSSSCG00000001342;ENSSSCG00000001346;ENSSSCG00000001347;ENSSSCG00000001372;ENSSSCG00000001376;ENSSSCG00000021130;ENSSSCG00000023639;ENSSSCG00000024604;ENSSSCG00000025892;ENSSSCG00000025943;ENSSSCG00000029425;ENSSSCG00000031492	TRIM39;ABCF1;PPP1R10;GNL1;DHX16;RPP21;NRM;ATAT1;PRR3;C6ORF136;MRPS18B;PPP1R18	9.7;61.72;18.44;21.68;14.24;19.97;2.69;4.71;5.47;12.28;160.42;6.83	9.17;27.4;16.87;51.03;10.89;46.38;0.34;27.27;19.96;37.73;35.8;6.52	0.01;0.84;0.08;1.34;0.27;1.54;1.19;2.52;1.89;1.68;0.02;0.03	0.880496921083167;3.98905179892852e-08;0.728212420529089;9.69558087678957e-14;0.154781836079472;3.73846365973283e-08;0.00391844904781172;1.15847147155172e-21;1.50523038692412e-13;9.51576192028782e-10;4.15769000724136e-20;0.835545742852236
Brain-restricted TAD boundary	7	35900000	36080000	-0.248184	5.20835e-12	1.18;1.22;1.25;1.15;1.16;1.22;1.07;0.95;1.2	1.01;0.85;0.88;0.86;0.7;0.78;0.5;1.06;0.57	0.16;0.36;0.37;0.28;0.46;0.44;0.57;0.11;0.62	ENSSSCG00000001597	LRFN2	0.13	11.86	6.38	2.0537e-58
Brain-restricted TAD boundary	7	74900000	75040000	-0.309655	3.11092e-12	3.6;3.7;4.11;4.3;4.18;4.21;4.33	1.09;1.59;2.04;2.72;2.52;2.55;2.39	2.5;2.1;2.06;1.58;1.65;1.66;1.93	ENSSSCG00000001986;ENSSSCG00000001987;ENSSSCG00000001988;ENSSSCG00000001989;ENSSSCG00000001990;ENSSSCG00000001991;ENSSSCG00000001992;ENSSSCG00000001993;ENSSSCG00000020941;ENSSSCG00000027911	NFATC4;RIPK3;ADCY4;CIDEB;NOP9;DHRS1;RABGGTA;TGM1;LTB4R2;LTB4R	8.09;54.45;5.16;350.93;17.01;67.37;5.15;1.27;5.39;2.3	2.71;2.4;3.4;0.29;5.18;15.27;14.95;1.89;1.7;0.15	0.67;3.58;0.58;9.94;0.29;1.88;1.71;0.61;0.44;3.98	0.000135670460316017;2.56570204317899e-69;0.0204679843158098;4.0312874289573e-150;1.61219592065236e-08;1.08259525603625e-07;4.47816582759267e-09;0.00231682255906775;2.85639544394555e-10;4.50963629614229e-13
Brain-restricted TAD boundary	7	110460000	110600000	-0.226995	7.94185e-09	-0.71;-1.86;-1.08;-2.68;-2.48;-2.51;-0.49	0.76;0.1;-0.92;-0.36;-0.27;-0.34;0.4	2.05;2.04;1.83;1.67;1.78;1.82;1.92	ENSSSCG00000002426	ZC3H14	130.18	76.29	0.78	4.48778e-07
Brain-restricted TAD boundary	8	2260000	2440000	-0.276262	1.30049e-09	2.82;2.82;2.81;2.59;2.38;2.44;2.41;2.5;2.71	0.82;0.9;1.04;0.88;0.64;0.76;0.75;0.84;0.73	1.99;1.92;1.77;1.71;1.74;1.68;1.65;1.66;1.97	ENSSSCG00000008703	ADRA2C	0.58	9.06	4.01	1.59627e-17
Brain-restricted TAD boundary	8	13880000	14060000	-0.219883	1.38207e-11	-1.51;-1.55;-1.87;-1.58;-1.16;-1.05;-2.76;-1.15;-1.04	0.74;0.35;0.27;0.39;0.47;0.64;0.84;0.37;0.55	1.75;2.1;1.86;2.03;2.37;2.3;2.39;2.48;2.41	-	-	-	-	-	-
Brain-restricted TAD boundary	8	16840000	16980000	-0.238104	1.06388e-12	-0.77;-0.72;0.91;0.81;0.86;-0.99;0.73	0.44;0.38;0.53;0.21;0.54;0.23;0.64	1.68;1.66;1.44;0.6;0.32;0.77;1.38	ENSSSCG00000008754	GBA3	168.88	2.86	4.19	2.40747e-127
Brain-restricted TAD boundary	8	17000000	17140000	-0.238104	1.06388e-12	-0.61;-0.23;-1.95;-1.79;-1.44;-1.37;-0.42	0.49;0.43;0.45;0.42;0.47;0.89;0.47	0.89;1.33;1.6;1.79;2.09;1.74;1.1	-	-	-	-	-	-
Brain-restricted TAD boundary	8	17720000	17900000	-0.226598	9.15275e-10	-0.85;0.98;0.64;0.53;0.5;0.12;0.11;0.06;0.39	0.54;0.62;0.19;0.6;0.57;0.14;0.08;0.17;0.4	0.6;0.35;0.44;0.07;0.07;0.26;0.03;0.23;0.01	-	-	-	-	-	-
Brain-restricted TAD boundary	8	55620000	55840000	-0.301011	2.24696e-09	3.81;4.07;4.15;4.43;4.48;4.07;3.58;3.35;3.42;4.67;3.62	3.36;3.74;3.5;3.5;4.02;3.75;3.37;3.17;3.12;3.84;3.24	0.45;0.32;0.64;0.92;0.45;0.31;0.21;0.18;0.3;0.83;0.37	ENSSSCG00000008899;ENSSSCG00000008900;ENSSSCG00000008901;ENSSSCG00000008902;ENSSSCG00000027403;ENSSSCG00000032353;ENSSSCG00000043888	ARL9;SRP72;PAICS;PPAT;AASDH;THEGL;Unknown	1.71;224.45;180.06;108.71;26.03;0.56;5.32	8.08;125.31;20.12;10.09;19.48;0.06;5.92	2.17;0.78;1.04;2.72;0.32;2.09;0.13	1.03313530160944e-12;2.62485464149466e-05;1.43370794837567e-44;5.64834445453515e-32;0.00290619397051621;0.0280926563632462;0.490738168267966
Brain-restricted TAD boundary	8	119300000	119440000	-0.238298	1.46267e-12	1.74;1.82;2.08;2.2;2.38;2.71;2.43	0.11;0.26;0.36;0.54;0.49;1.56;0.75	1.86;1.55;1.71;1.66;1.88;1.15;1.67	ENSSSCG00000009172;ENSSSCG00000048657	PPP3CA;Unknown	90.13;1.82	412.6;1.41	2.13;0.55	2.50375030820793e-40;0.139399460295745
Brain-restricted TAD boundary	8	127060000	127220000	-0.304317	2.52644e-13	-0.17;-0.35;-0.65;-0.53;-0.45;-0.36;-0.28;-0.79	0.02;0.03;0.39;0.28;0.18;0.19;0.24;0.73	1.85;1.69;1.74;1.76;1.74;1.45;1.47;1.95	-	-	-	-	-	-
Brain-restricted TAD boundary	9	2980000	3120000	-0.253214	1.05173e-10	0.94;0.21;0.31;1.23;1.67;2.1;0.13	-0.93;0.54;0.14;1.5;2.26;2.68;0.42	0.12;0.75;0.45;0.26;0.58;0.57;0.29	ENSSSCG00000014600;ENSSSCG00000024693;ENSSSCG00000029189	ZNF215;MRPL17;DCHS1	0.67;23.17;3.18	2.67;10.93;10.09	1.9;0.94;1.66	2.41554444698346e-12;1.15913448157277e-06;1.56375477737445e-08
Brain-restricted TAD boundary	9	16380000	16560000	-0.211791	1.87494e-10	-3.84;-3.75;-3.63;-3.24;-3.12;-4.81;-4.79;-3.86;-3.05	-1.53;-1.68;-1.66;-1.5;-1.44;-1.13;-1.09;-1.53;-1.3	1.68;1.92;2.03;2.26;2.32;2.32;2.3;1.66;2.25	-	-	-	-	-	-
Brain-restricted TAD boundary	9	26200000	26340000	-0.201132	1.66639e-12	0.97;0.52;0.12;0.16;0.57;0.93;1.42	1.24;0.7;0.16;0.01;0.45;0.81;1.73	0.26;0.18;0.03;0.17;0.11;0.11;0.31	ENSSSCG00000014950;ENSSSCG00000041237	VSTM5;Unknown	1.29;0.73	9.04;1.02	2.73;0.52	5.06603417063995e-40;0.217801294523127
Brain-restricted TAD boundary	9	41320000	41460000	-0.268838	9.88004e-10	1.46;1.75;2.12;2.66;2.52;2.66;2.68	2.36;2.49;2.93;3.56;2.91;2.83;3.33	0.9;0.73;0.8;0.89;0.39;0.17;0.65	ENSSSCG00000015049;ENSSSCG00000015050;ENSSSCG00000015051	TMPRSS5;ZW10;CLDN25	0.17;86.23;0.41	3.22;26.17;0.41	5.03;0.26;-	2.47653044598641e-13;4.52534143272341e-13;-
Brain-restricted TAD boundary	11	2720000	2940000	-0.275493	1.65639e-12	2.19;2.47;2.71;3.01;2.96;2.95;2.82;3.36;3.21;2.36;3.2	2.19;2.24;2.41;2.78;2.82;2.7;2.37;2.87;2.77;2.23;2.67	0;0.23;0.3;0.23;0.13;0.24;0.45;0.48;0.43;0.13;0.53	ENSSSCG00000009285;ENSSSCG00000009290;ENSSSCG00000031308	C1QTNF9;MIPEP;Unknown	1.59;47.99;0.14	1.7;11.89;0.03	0.26;0.3;-	0.703883167540875;2.20959684698005e-16;-
Brain-restricted TAD boundary	11	3140000	3280000	-0.299371	4.71962e-11	2.45;2.66;3.12;3.29;2.99;2.56;2.29	2.83;2.87;3.45;3.43;2.95;2.24;2.97	0.37;0.2;0.33;0.13;0.04;0.31;0.68	ENSSSCG00000035119;ENSSSCG00000035318;ENSSSCG00000035421	MTMR6;NUP58;ATP8A2	30.75;60.94;0.35	76.01;49.35;31.55	1.39;0.23;6.12	2.4898585526954e-34;0.204177914090703;1.50876273218949e-116
Brain-restricted TAD boundary	12	4900000	5040000	-0.271495	1.08039e-10	3.68;4.1;4.09;4.15;4.06;4.24;4.04	3.88;4.19;4.46;4.62;4.09;4.33;4.38	0.19;0.09;0.37;0.47;0.02;0.08;0.34	ENSSSCG00000017177;ENSSSCG00000017181;ENSSSCG00000023362;ENSSSCG00000028604	ST6GALNAC2;CYGB;RHBDF2;PRCD	41.34;7.91;4.83;2.07	18.8;15.91;0.66;0.75	0.94;1.13;1.22;0.74	3.76730284957419e-05;0.000299774570209358;8.701826044565e-17;0.409333379533447
Brain-restricted TAD boundary	12	56440000	56600000	-0.230996	6.37418e-08	-2.86;-2.94;-2.34;-2.36;-2.25;-2.12;-3.96;-2.56	-2.69;-2.6;-2.07;-3.9;-3.49;-3.28;-3.18;-2.39	0.17;0.33;0.26;0.46;0.76;0.83;0.77;0.17	-	-	-	-	-	-
Brain-restricted TAD boundary	12	58080000	58260000	-0.312433	1.07083e-08	-2.79;-2.88;-2.9;-2.78;-2.59;-2.13;-3.84;-3.61;-2.17	-2.93;-1.09;-1.2;-2.45;-3.9;-3.59;-3.34;-3.37;-3.5	0.14;0.21;0.3;0.33;0.69;0.53;0.5;0.24;0.67	ENSSSCG00000039318	HS3ST3B1	15.45	0.38	4.83	3.09483e-85
Brain-restricted TAD boundary	12	59840000	59980000	-0.202215	9.34875e-09	2.77;2.75;2.89;3.11;3.41;3.25;2.89	4.69;4.49;4.93;4.51;4.63;4.53;4.56	1.92;1.74;2.03;1.4;1.21;1.27;1.66	ENSSSCG00000018041;ENSSSCG00000018042;ENSSSCG00000018044	ALDH3A2;SLC47A2;ALDH3A1	200.04;0.13;0.47	46.08;0.25;1.49	0.13;-;2.19	1.14825007034737e-18;-;0.000290970276794574
Brain-restricted TAD boundary	13	97780000	97960000	-0.212218	3.66406e-12	-1.48;-1.62;-1.85;-0.13;-0.66;0.88;-0.76;-0.75;-0.96	-1.41;-1.45;-1.75;-0.36;0.63;0.63;-0.84;-0.47;0.52	0.07;0.16;0.1;0.22;0.7;1.51;0.07;0.28;0.52	ENSSSCG00000025238;ENSSSCG00000027556	SHOX2;RSRC1	0.51;124.73	0.12;20.2	1.92;1.4	1.23184462812433e-06;3.51297017645601e-24
Brain-restricted TAD boundary	13	106640000	106780000	-0.357571	9.40723e-10	-0.62;-0.7;-0.86;0.84;0.69;0.21;-0.76	-0.08;-1.87;-0.09;-1.98;-1.96;-1.88;-0.27	0.54;0.82;0.77;1.17;1.34;1.9;0.49	ENSSSCG00000040950	Unknown	0.44	0.83	0.83	0.123483
Brain-restricted TAD boundary	13	129840000	129980000	-0.289113	5.56399e-17	-0.26;-0.72;0.16;0.32;0.3;0.28;0.68	-0.42;-0.71;0.42;0.23;0.23;0.36;0.55	0.15;0;0.25;0.56;0.54;0.65;0.12	-	-	-	-	-	-
Brain-restricted TAD boundary	13	148500000	148640000	-0.21433	6.7199e-07	0.35;0.24;0.14;0.37;0.51;0.34;0.6	-0.86;0.89;0.27;0.64;-0.49;-0.78;-0.14	0.79;0.64;0.13;0.26;0.99;0.87;1.25	ENSSSCG00000011933;ENSSSCG00000030335	NECTIN3;Unknown	223.65;0.22	60.33;1.01	0.22;2.57	1.56323184614109e-13;1.7172473402337e-06
Brain-restricted TAD boundary	14	14660000	14840000	-0.216241	7.56245e-12	0.4;0.42;0.48;0.72;0.83;0.91;0.8;0.97;0.41	0.8;-1.83;-0.23;-0.2;-1.96;-1.54;-1.16;-1.22;-0.38	1.21;2.6;2.25;2.53;2.88;3.37;3.65;3.75;2.04	ENSSSCG00000027568;ENSSSCG00000032852	BLK;FAM167A	0.43;0.35	0.03;6.25	-;4.24	-;6.00523033477268e-19
Brain-restricted TAD boundary	14	27480000	27660000	-0.292117	3.39975e-13	-3.39;-3.49;-3.69;-3.53;-3.62;-3.67;-3.68;-3.57;-3.71	-0.6;-0.79;-0.88;-0.92;-0.96;-0.97;-0.75;-0.83;-0.98	3.2;3.29;3.19;3.38;3.34;3.3;3.07;3.25;3.26	-	-	-	-	-	-
Brain-restricted TAD boundary	14	81720000	81900000	-0.21027	8.42025e-13	2.77;2.79;2.93;2.34;2.32;2.31;2.09;1.85;2.48	1.95;1.96;1.89;0.92;0.03;0.07;0.11;0;1.15	0.81;0.83;1.03;1.42;2.29;2.38;1.97;1.84;1.32	ENSSSCG00000010331;ENSSSCG00000033074	ANXA11;ZCCHC24	57.96;54.04	22.46;31.04	0.63;0.65	3.75428778134568e-11;0.000318981638346515
Brain-restricted TAD boundary	14	93160000	93340000	-0.204414	5.25375e-12	-4.52;-4.77;-4.73;-4.65;-4.51;-4.44;-4.48;-4.66;-4.41	-3.59;-3.98;-3.7;-3.61;-3.72;-3.51;-3.35;-3.64;-3.51	1.07;1.21;0.97;0.95;1.2;1.07;0.86;0.97;1.1	ENSSSCG00000044916	Unknown	0.64	1.98	1.42	1.82258e-05
Brain-restricted TAD boundary	14	93980000	94160000	-0.204414	5.25375e-12	-4.65;-4.62;-4.9;-3.09;-3.28;-3.67;-3.11;-4.8;-3.51	-3.57;-3.65;-3.71;-3.86;-2.05;-2.91;-2.07;-3.77;-2.5	0.91;1.03;0.81;0.77;0.77;1.24;0.96;0.96;0.99	ENSSSCG00000027984;ENSSSCG00000047077	ZWINT;Unknown	14.87;0.43	1.48;1.47	2.7;1.66	3.03225565315058e-12;0.000218092004733434
Brain-restricted TAD boundary	14	94680000	94820000	-0.204414	5.25375e-12	-4.96;-4.91;-4.91;-4.96;-4.98;-4.92;-3.02	-3.7;-3.59;-3.58;-3.62;-3.83;-3.65;-2.03	0.73;0.68;0.67;0.65;0.85;0.73;1	-	-	-	-	-	-
Brain-restricted TAD boundary	14	95920000	96060000	-0.204414	5.25375e-12	-3.55;-3.86;-3.85;-3.76;-3.71;-3.86;-3.7	-2.56;-2.63;-2.68;-2.62;-2.54;-2.51;-2.6	1.01;0.77;0.83;0.85;0.83;0.65;0.9	-	-	-	-	-	-
Brain-restricted TAD boundary	14	103260000	103440000	-0.207084	2.89903e-13	0.88;0.49;0.65;0.89;1.16;1.49;1.56;0.61;1.65	0.63;-1.82;-1.82;-0.14;-0.96;0.17;0.18;-0.39;0.08	1.52;2.67;2.84;2.76;2.21;1.66;1.75;2.23;1.73	ENSSSCG00000010464;ENSSSCG00000010465;ENSSSCG00000031691	PPP1R3C;TNKS2;Unknown	74.55;67.27;0.02	18.03;62.4;0	0.21;0.11;-	8.0576985619703e-10;0.584651988820014;-
Brain-restricted TAD boundary	14	140240000	140400000	-0.261998	9.9202e-10	1.25;1.49;1.61;2.54;3.42;2.75;0.82;3.5	1.9;2.27;2.34;3.57;4.12;3.39;2.16;4.32	0.64;0.77;0.72;1.03;0.7;0.63;1.33;0.81	ENSSSCG00000024388;ENSSSCG00000024633;ENSSSCG00000027988	BNIP3;JAKMIP3;Unknown	198.83;0.17;16.78	53.55;10.72;8.16	0.34;5.92;0.98	3.43441563996507e-24;1.83417229465235e-27;3.77908398367141e-06
Brain-restricted TAD boundary	14	141320000	141460000	-0.618392	4.72759e-11	4.26;4.47;3.56;2.61;1.74;0.59;1.29	3.46;3.69;2.76;0.87;-0.62;-2.68;-1.41	0.8;0.77;0.79;1.74;3.13;3.92;3.88	ENSSSCG00000010787;ENSSSCG00000010788;ENSSSCG00000010791;ENSSSCG00000010792;ENSSSCG00000029088;ENSSSCG00000038086;ENSSSCG00000039939;ENSSSCG00000040586	SCART1;Unknown;FUOM;PRAP1;MTG1;ECHS1;Unknown;AL360181.3	0.04;0.04;156.08;1.93;42.14;825.91;0.01;20.33	0.01;0;10.09;0.72;16.75;47.58;0;5.34	-;-;2.24;0.95;0.85;2.2;-;0.26	-;-;1.73911377703988e-82;0.249876244978242;2.60774072487216e-06;8.00662460762974e-59;-;6.18462602654256e-11
Brain-restricted TAD boundary	15	7420000	7580000	-0.302462	4.50608e-14	0.47;0.47;0.92;1.31;1.3;1.65;1.58;0.65	0.87;0.69;1.29;1.99;2.03;2.53;2.36;0.87	0.39;0.22;0.37;0.67;0.72;0.88;0.77;0.21	ENSSSCG00000021343	ZEB2	50.85	205.11	1.98	5.50644e-40
Brain-restricted TAD boundary	15	67120000	67260000	-0.248464	2.98988e-14	0.85;0.99;1.22;1.5;1.86;2.2;1.83	0.43;0.19;0.21;0.75;0.86;1.07;1.02	1.29;1.18;1.01;0.74;1;1.13;0.81	ENSSSCG00000015886	ITGB6	0.59	0.21	0.33	0.000361331
Brain-restricted TAD boundary	16	9100000	9280000	-0.400321	1.08625e-12	-1.94;-1.99;-0.03;-0.04;-0.06;-0.63;-0.69;-0.53;-1.95	0.83;0.9;-0.84;-0.37;-0.28;-0.36;-0.34;-0.5;-0.66	1.23;1.1;0.81;0.33;0.22;0.26;0.34;0.03;0.71	-	-	-	-	-	-
Brain-restricted TAD boundary	16	11780000	11960000	-0.264554	2.16093e-13	-3.47;-3.54;-3.56;-3.43;-3.54;-3.51;-3.57;-3.47;-3.49	-1.67;-1.9;-1.75;-1.84;-1.76;-1.72;-1.8;-1.96;-1.58	2.19;2.36;2.19;2.4;2.22;2.2;2.23;2.48;2.09	-	-	-	-	-	-
Brain-restricted TAD boundary	16	15820000	15960000	-0.223384	2.70449e-09	-3.77;-3.71;-3.71;-3.95;-3.68;-3.54;-3.77	-1.24;-1.48;-1.45;-1.87;-1.62;-1.43;-1.32	1.46;1.77;1.74;1.92;1.94;1.89;1.55	ENSSSCG00000033328	Unknown	0.06	0.25	-	-
Brain-restricted TAD boundary	16	56560000	56740000	-0.235354	1.06683e-09	-2.57;-2.51;-2.53;-2.4;-2.48;-2.3;-2.38;-2.39;-2.57	-1.89;-1.95;-0.41;-0.36;-0.49;-0.59;-0.72;-0.66;-0.33	1.32;1.44;1.87;1.95;2.01;2.28;2.33;2.26;1.75	-	-	-	-	-	-
Brain-restricted TAD boundary	16	74660000	74820000	-0.240804	3.01116e-09	-3.96;-2.1;-2.65;-2.57;-2.46;-2.52;-2.46;-2.37	0.32;0.01;0.17;0.09;0.28;0.04;0.4;0	3.71;3.91;3.53;3.33;3.83;3.44;3.13;3.63	-	-	-	-	-	-
Brain-restricted TAD boundary	17	25020000	25200000	-0.204512	4.12198e-09	-1.27;-1.2;-1.21;-1.35;-1.47;-1.62;-1.8;-1.37;-1.64	-2.56;-2.7;-2.74;-2.53;-2.49;-2.6;-2.65;-2.61;-2.65	0.7;0.49;0.47;0.82;0.98;1.02;1.14;0.76;0.99	ENSSSCG00000007080	Unknown	43.26	9.61	1.92	9.902e-18
Brain-restricted TAD boundary	17	31860000	32040000	-0.242077	4.24798e-07	3.13;3.07;3.4;3.35;3.22;3.07;3.02;3.16;2.9	3.38;3.3;3.69;3.73;3.79;3.48;3.57;3.81;3.33	0.25;0.22;0.28;0.37;0.56;0.41;0.54;0.64;0.42	ENSSSCG00000007143;ENSSSCG00000007145;ENSSSCG00000007146;ENSSSCG00000007147;ENSSSCG00000007149;ENSSSCG00000007151;ENSSSCG00000033297;ENSSSCG00000035666	MAVS;ADAM33;SIGLEC1;HSPA12B;SPEF1;CDC25B;AP5S1;C20ORF27	25.04;0.8;10.77;3.93;0.54;7.26;9.37;40.59	19.26;11.16;0.61;4.42;2.03;4.56;14.82;46	0.29;3.73;3.75;0.16;1.97;0.56;0.61;0.26	0.113302836441607;1.87533183664416e-24;8.89310430620588e-14;0.530308210489048;4.43152678748561e-08;0.081178603201707;0.00732994609462115;0.217028872464651
Brain-restricted TAD boundary	17	33800000	33940000	-0.224612	1.74159e-14	2.06;2.3;2.58;2.53;2.88;2.95;2.05	2.03;2.39;2.6;2.53;2.97;2.95;1.94	0.02;0.09;0.01;0;0.08;0;0.1	ENSSSCG00000007185;ENSSSCG00000007187;ENSSSCG00000007188	SIRPB2;NSFL1C;FKBP1C	2.2;68.56;44.87	3.59;78.95;55.98	0.6;0.24;0.4	0.0567784813838669;0.334264546916528;0.0101624029603348
Brain-restricted TAD boundary	17	43720000	43880000	-0.227926	2.60207e-10	1.38;1.29;1.26;1.4;1.33;1.24;1.07;1.14	1.58;1.67;2.01;2.51;2.15;2.13;1.85;1.62	0.2;0.38;0.74;1.1;0.82;0.88;0.77;0.47	ENSSSCG00000007356	PLCG1	9.27	43.77	2.25	1.00529e-36
Brain-restricted TAD boundary	18	3840000	4000000	-0.276435	1.28295e-08	-3.89;-3.86;-3.81;-3.7;-3.9;-3.73;-3.94;-3.81	0.34;0.24;0.05;0.08;0.26;0.17;0.22;0.1	3.77;3.9;4.13;4.39;3.83;4.09;3.84;4.08	ENSSSCG00000016423	DPP6	0.06	139.63	11.43	1.70419e-36
Brain-restricted TAD boundary	18	8120000	8260000	-0.280516	4.1713e-10	1.01;1.05;1.11;1.27;0.86;0.6;0.82	-0.87;0.4;0.48;0.31;0.31;-0.11;0.1	2.15;1.45;1.59;1.58;1.17;2.5;0.93	ENSSSCG00000016488;ENSSSCG00000016489;ENSSSCG00000016491;ENSSSCG00000021525;ENSSSCG00000028394	SSBP1;WEE2;DENND11;TAS2R4;TAS2R3	78.21;0.06;13.23;0.36;0.37	18.96;0;29.31;0.21;0.55	1.88;-;1.24;-;0.73	3.30465359939658e-22;-;7.90355846111159e-11;-;0.513821304079408

## Sheet: Sheet 3 (muscle vs. brain)
Shifted TAD boundaries between muscle and brain	Chromosome	Start	End	ΔLBS (muscle – brain)	P-value of LBS	A-B index of each TAD boundary bin in muscle	A-B index of each TAD boundary bin in brain	|ΔA-B index| (muscle – brain)	Gene Ensembl ID	Gene symbol	TPM in muscle	TPM in brain	|log2FC of expression|	P-value of expression
Muscle-restricted TAD boundary	1	126680000	126820000	0.221371	1.10751e-08	1.22;1;0.75;0.91;1.26;1.85;0.89	1.13;1.22;0.78;1.08;1.2;1.89;0.94	0.09;0.21;0.03;0.17;0.06;0.04;0.05	ENSSSCG00000004679;ENSSSCG00000004680;ENSSSCG00000004681	SORD;TERB2;TRIM69	10.93;0.46;0.18	8.41;0.27;0.01	0.27;-;-	0.124981829217928;-;-
Muscle-restricted TAD boundary	1	155380000	155520000	0.207776	1.62417e-09	-2.25;-2.37;-2.35;-2.62;-2.52;-2.43;-2.53	-1.94;-1.96;-1.91;-0.26;-1.99;-1.77;-0.18	1.68;1.59;1.55;1.64;1.46;1.34;1.64	-	-	-	-	-	-
Muscle-restricted TAD boundary	1	160000000	160180000	0.253121	1.01755e-07	-0.08;-1.68;-1.2;-2.85;-2.69;-2.79;-2.77;-0.14;-2.78	0.7;-0.34;-1.81;-1.64;-1.68;-1.73;-1.74;0.73;-1.73	1.21;0.66;0.61;0.78;0.98;0.93;0.96;1.12;0.95	ENSSSCG00000004903	CDH20	0.7	22.56	5.15	8.14726e-118
Muscle-restricted TAD boundary	1	176020000	176160000	0.2501	3.29382e-10	-3.82;-3.82;-3.85;-3.88;-3.93;-2.03;-3.75	-0.21;-0.02;-0.1;-0.16;-0.29;-0.26;-0.02	2.38;2.2;2.25;2.28;2.35;2.22;2.26	-	-	-	-	-	-
Muscle-restricted TAD boundary	1	178540000	178680000	0.207272	2.71528e-07	-3.76;-3.79;-3.79;-3.82;-3.92;-3.82;-3.93	-1.67;-1.77;-1.73;-1.65;-1.74;-1.97;-1.91	1.9;1.98;1.93;1.82;1.82;2.15;1.98	-	-	-	-	-	-
Muscle-restricted TAD boundary	1	185840000	185980000	0.300459	4.59041e-08	0.21;-0.9;-0.12;-1.71;-1.53;-1.39;0.44	0.51;0.07;0.76;-0.81;-0.71;-0.65;0.38	0.72;1.18;1.11;1.1;1.18;1.25;0.83	-	-	-	-	-	-
Muscle-restricted TAD boundary	1	186240000	186380000	0.300459	4.59041e-08	-1.25;-1.44;-1.64;-0.24;-0.82;0.14;-1.17	-0.75;-0.93;0.84;0.59;0.08;0.56;-0.69	1.49;1.48;1.51;1.17;1.09;0.7;1.52	-	-	-	-	-	-
Muscle-restricted TAD boundary	1	186240000	186380000	0.347456	2.3808e-11	-1.25;-1.44;-1.64;-0.24;-0.82;0.14;-1.17	-0.75;-0.93;0.84;0.59;0.08;0.56;-0.69	1.49;1.48;1.51;1.17;1.09;0.7;1.52	-	-	-	-	-	-
Muscle-restricted TAD boundary	1	257260000	257400000	0.394703	4.52364e-13	-3.28;-3.27;-3.18;-3.17;-3.46;-3.39;-3.37	0.9;0.9;-0.92;0.95;0.66;0.43;0.98	3.82;3.82;3.74;3.88;3.87;4.18;3.65	-	-	-	-	-	-
Muscle-restricted TAD boundary	2	7680000	7820000	0.212134	2.13697e-06	5.31;5.5;5.72;6.27;6.03;6.52;5.7	5.13;5.45;5.62;5.8;5.64;6.17;5.43	0.17;0.04;0.09;0.46;0.38;0.35;0.27	ENSSSCG00000013027;ENSSSCG00000013028;ENSSSCG00000013029;ENSSSCG00000013030;ENSSSCG00000013042;ENSSSCG00000028806	CATSPERZ;ESRRA;TRMT112;PRDX5;CCDC88B;RPS6KA4	0.17;177.63;198.19;54.05;0.51;10.03	8.78;17.1;106.48;102.53;0.93;8.7	6.54;2.74;0.77;1.01;1;0.09	6.56273946301148e-23;2.15342812747891e-37;0.00587848438127213;2.61211371625724e-05;0.0018241667362478;0.644645979083691
Muscle-restricted TAD boundary	2	48360000	48540000	0.440017	7.5693e-12	2.45;2.67;2.99;3.64;3.7;3.92;4.12;2.3;3.6	0.78;0.99;1.07;1.16;1.3;1.53;1.56;0.62;1.6	1.67;1.68;1.91;2.48;2.39;2.38;2.55;1.68;2	-	-	-	-	-	-
Muscle-restricted TAD boundary	2	48360000	48540000	0.221607	9.25568e-09	2.45;2.67;2.99;3.64;3.7;3.92;4.12;2.3;3.6	0.78;0.99;1.07;1.16;1.3;1.53;1.56;0.62;1.6	1.67;1.68;1.91;2.48;2.39;2.38;2.55;1.68;2	-	-	-	-	-	-
Muscle-restricted TAD boundary	2	51480000	51680000	0.2017	3.35233e-10	3.4;3.96;3.39;3.05;2.49;2.25;2.33;4.42;4.46;3.23	0.61;-1;-0.54;-0.51;-1;0.56;0.35;2.23;0.56;0.67	4.01;4.97;4.85;4.55;3.5;2.81;2.68;2.18;5.03;2.55	ENSSSCG00000032994;ENSSSCG00000046223;ENSSSCG00000048088	RNF187;Unknown;Unknown	24.12;0.74;0.38	38.76;1.23;0.35	0.78;0.85;-	0.000217212807741073;0.0573518835174642;-
Muscle-restricted TAD boundary	2	95520000	95660000	0.330843	3.12013e-12	-3.3;-3.77;-2.32;-2.74;-1.34;-1.56;-3.43	-0.43;-0.15;-0.76;-0.55;-0.69;-0.73;-0.07	3.13;2.37;2.44;1.8;1.35;1.16;2.64	-	-	-	-	-	-
Muscle-restricted TAD boundary	3	51680000	51820000	0.234362	7.47187e-07	-2.92;-1.21;-1.26;-1.23;-2.38;-3.98;-2.71	-1.57;-1.46;-1.52;-1.74;-1.76;-1.18;-1.92	0.65;0.24;0.26;0.5;1.37;1.19;1.2	ENSSSCG00000008155;ENSSSCG00000008157	SLC9A4;IL18RAP	0.14;0.2	0.2;0.06	-;-	-;-
Muscle-restricted TAD boundary	3	129320000	129500000	0.223171	1.40364e-08	-3.34;-3.25;-3.2;-3.38;-3.58;-3.73;-3.88;-3.06;-2.14	-1.71;-1.56;-1.49;-1.64;-2;-1.93;-1.72;-1.41;-1.68	2.36;2.3;2.28;2.25;2.42;2.19;1.83;2.34;1.53	-	-	-	-	-	-
Muscle-restricted TAD boundary	4	1060000	1300000	0.296449	1.53595e-08	4.16;4.73;4.9;4.34;4.14;4.26;4.52;4.39;4.06;3.67;3.55;4.3	2.41;2.38;2.51;2.56;2.52;2.58;2.53;2.49;2.52;2.18;1.86;2.42	1.75;2.34;2.38;1.77;1.62;1.68;1.98;1.9;1.53;1.49;1.68;1.87	ENSSSCG00000006957;ENSSSCG00000006958;ENSSSCG00000006959;ENSSSCG00000033353;ENSSSCG00000034689;ENSSSCG00000034820;ENSSSCG00000039881;ENSSSCG00000049988;ENSSSCG00000050716	RHPN1;TOP1MT;ZNF696;LY6H;GPIHBP1;MAFA;GLI4;LY6L;Unknown	0.29;1.04;10.98;0.21;124.29;50.58;24.29;0;0	4;1.9;9.32;80.22;8.03;1.93;24.76;0.46;0	3.95;0.98;0.11;9.03;2.16;3.32;0.14;-;-	2.78302898642583e-23;0.000976479174287052;0.65127089485733;2.09858138731438e-48;3.18861087139183e-11;3.84124993114099e-59;0.629334709614143;-;-
Muscle-restricted TAD boundary	4	1060000	1300000	0.223352	0.000156023	4.16;4.73;4.9;4.34;4.14;4.26;4.52;4.39;4.06;3.67;3.55;4.3	2.41;2.38;2.51;2.56;2.52;2.58;2.53;2.49;2.52;2.18;1.86;2.42	1.75;2.34;2.38;1.77;1.62;1.68;1.98;1.9;1.53;1.49;1.68;1.87	ENSSSCG00000006957;ENSSSCG00000006958;ENSSSCG00000006959;ENSSSCG00000033353;ENSSSCG00000034689;ENSSSCG00000034820;ENSSSCG00000039881;ENSSSCG00000049988;ENSSSCG00000050716	RHPN1;TOP1MT;ZNF696;LY6H;GPIHBP1;MAFA;GLI4;LY6L;Unknown	0.29;1.04;10.98;0.21;124.29;50.58;24.29;0;0	4;1.9;9.32;80.22;8.03;1.93;24.76;0.46;0	3.95;0.98;0.11;9.03;2.16;3.32;0.14;-;-	2.78302898642583e-23;0.000976479174287052;0.65127089485733;2.09858138731438e-48;3.18861087139183e-11;3.84124993114099e-59;0.629334709614143;-;-
Muscle-restricted TAD boundary	4	4760000	4900000	0.257741	1.12003e-08	-4.71;-4.61;-4.59;-4.57;-4.4;-4.2;-4.17	0.92;0.96;-0.83;0.98;-0.72;-0.73;-0.73	4.37;4.42;4.23;4.44;4.31;4.52;4.56	-	-	-	-	-	-
Muscle-restricted TAD boundary	4	4760000	4900000	0.259304	5.06016e-14	-4.71;-4.61;-4.59;-4.57;-4.4;-4.2;-4.17	0.92;0.96;-0.83;0.98;-0.72;-0.73;-0.73	4.37;4.42;4.23;4.44;4.31;4.52;4.56	-	-	-	-	-	-
Muscle-restricted TAD boundary	4	5960000	6140000	0.259304	5.06016e-14	-2.3;-2.45;-2.53;-2.88;-1.1;-1.2;-1.34;-1.49;-2.65	0.68;0.62;0.47;0.38;0.17;0.27;0.3;0.3;0.34	3.02;2.92;3;2.74;2.73;2.52;2.35;2.21;3	-	-	-	-	-	-
Muscle-restricted TAD boundary	4	7360000	7540000	0.228109	9.23162e-08	1.28;1.16;1.37;1.67;1.71;1.9;1.96;2.15;1.78	0.74;0.77;0.79;0.8;0.96;0.94;0.98;1.14;0.75	0.54;0.38;0.58;0.86;0.75;0.96;0.98;1.01;1.02	-	-	-	-	-	-
Muscle-restricted TAD boundary	4	33480000	33740000	0.24368	1.51707e-06	-2.44;-2.46;-2.55;-1.02;-1.74;-0.26;-0.48;0.94;0.14;1.2;0.46;0.58;-2.61	-0.61;-0.68;-0.71;0.95;0.57;0.05;0.52;0.6;0.25;0.61;0.3;0.25;-0.91	2.16;2.22;2.15;2.03;1.68;1.79;0.99;0.34;0.11;0.59;0.77;0.33;2.29	ENSSSCG00000006048;ENSSSCG00000006049;ENSSSCG00000031957;ENSSSCG00000049578	DCAF13;AC012213.5;RIMS2;Unknown	68.97;7.31;0.39;4.48	30.03;4.68;78.94;4.8	0.91;0.54;7.81;0.22	6.55568432233286e-09;0.00661388307753495;2.56956640202047e-78;0.614129539645705
Muscle-restricted TAD boundary	4	112840000	113020000	0.235555	4.43812e-08	-5.92;-5.94;-5.89;-5.83;-5.63;-5.48;-5.5;-4.23;-5.57	-2.17;-2.06;-2.13;-2.3;-4;-3.96;-3.88;-2.21;-2.01	2.24;2.11;2.24;2.47;2.36;2.47;2.37;1.97;2.44	-	-	-	-	-	-
Muscle-restricted TAD boundary	4	114800000	114980000	0.245157	5.8905e-10	-3.11;-3.11;-3.16;-3.4;-3.69;-2.06;-1.43;-3.14;-2.82	-3.39;-3.29;-3.33;-3.32;-3.47;-3.48;-3.69;-3.41;-3.71	0.28;0.17;0.17;0.08;0.22;0.57;1.73;0.27;1.11	ENSSSCG00000035697	Unknown	0.64	1.44	1.29	0.0160558
Muscle-restricted TAD boundary	5	19000000	19220000	0.386195	1.60981e-08	2.43;2.04;2.2;1.78;2.04;2.8;2.96;3.47;3.8;2.67;2.38	0.66;0.88;0.98;-0.84;0.9;0.32;0.05;0.05;0.23;0.43;0.73	3.09;2.93;3.19;2.94;2.94;3.12;3.02;3.53;3.56;3.11;3.12	ENSSSCG00000000279;ENSSSCG00000000281;ENSSSCG00000022728;ENSSSCG00000028104;ENSSSCG00000034474	HOXC13;HOXC12;HOXC10;HOXC11;HOXC9	0.04;0;3.91;0.26;21.05	0.06;0;0;0;0.01	-;-;8.84;-;9.04	-;-;0.0127491111684941;-;4.16511992047424e-21
Muscle-restricted TAD boundary	5	103140000	103340000	0.237596	2.18197e-09	0.3;0.38;0.2;0.43;0.7;1.1;1.88;2.4;0.45;0.78	0.91;0.41;0.11;0.96;0.87;0.87;0.52;1;0.64;0	1.22;0.79;0.09;0.52;0.16;0.22;1.35;1.4;1.1;0.79	-	-	-	-	-	-
Muscle-restricted TAD boundary	5	103480000	103660000	0.237596	2.18197e-09	0.61;0.57;-0.92;-0.34;-1.95;-1.99;-1.78;-1.84;-0.62	0.32;0.2;0.39;0.25;0.63;0.83;0.75;-0.91;0.2	0.28;0.36;0.69;1.4;1.41;1.17;1.47;1.07;1.17	-	-	-	-	-	-
Muscle-restricted TAD boundary	5	103480000	103660000	0.23792	3.75056e-08	0.61;0.57;-0.92;-0.34;-1.95;-1.99;-1.78;-1.84;-0.62	0.32;0.2;0.39;0.25;0.63;0.83;0.75;-0.91;0.2	0.28;0.36;0.69;1.4;1.41;1.17;1.47;1.07;1.17	-	-	-	-	-	-
Muscle-restricted TAD boundary	5	104020000	104240000	0.23792	3.75056e-08	0.72;0.44;-0.9;1.5;2.67;3.83;4.13;4.96;4.83;0.25;5.21	0.1;0.03;-0.75;0.85;2.06;3.21;3.14;3.56;3.42;0.13;3.84	0.62;0.48;0.14;0.65;0.61;0.61;0.99;1.39;1.41;0.11;1.37	ENSSSCG00000000950;ENSSSCG00000043521	E2F7;Unknown	1.53;1.44	0.84;2.62	0.81;0.96	0.171857830345825;0.00270055157282806
Muscle-restricted TAD boundary	6	59900000	60040000	0.215688	2.9018e-07	0.27;0.87;-0.4;-1.62;-2.85;-2.49;-2.26	1.06;1.02;0.45;0.11;0.26;0.53;0.88	1.34;1.89;2.06;2.27;2.88;2.97;2.85	ENSSSCG00000003306;ENSSSCG00000003307;ENSSSCG00000038117;ENSSSCG00000049200	HELZ2;NLRP9;Unknown;Unknown	0;0;0;0	0;0.01;0;0	-;-;-;-	-;-;-;-
Muscle-restricted TAD boundary	6	117840000	117980000	0.271922	7.57712e-12	-4.83;-4.82;-4.84;-4.88;-3.14;-3.33;-3.56	-2.28;-2.35;-2.4;-2.37;-2.57;-2.63;-2.73	1.44;1.52;1.55;1.48;1.42;1.3;1.17	-	-	-	-	-	-
Muscle-restricted TAD boundary	6	153900000	154040000	0.230776	9.13141e-11	-2.84;-3.98;-3.32;-4.98;-4.56;-4.2;-4.32	-1.92;-1.65;-1.57;-1.16;-1.18;-1.21;-1.22	1.07;1.66;2.25;2.17;2.61;3.01;2.9	-	-	-	-	-	-
Muscle-restricted TAD boundary	6	154220000	154420000	0.230776	9.13141e-11	-5.67;-4.07;-4.14;-4.11;-4.11;-4.25;-4.16;-4.32;-4.02;-4.23	-1.44;-1.73;-1.86;-1.9;-1.9;-1.93;-1.83;-0.12;-1.83;-0.17	3.77;3.66;3.72;3.79;3.79;3.67;3.67;3.8;3.8;3.94	-	-	-	-	-	-
Muscle-restricted TAD boundary	7	22640000	22860000	0.256926	5.26425e-07	1.65;0.34;0.23;0.57;0.94;1.67;1.63;2.15;1.99;0.8;1.63	1.95;0.69;0.52;0.76;1.29;2.09;1.94;2.03;1.85;1.09;1.68	0.3;0.34;0.28;0.18;0.35;0.42;0.3;0.12;0.14;0.28;0.04	ENSSSCG00000001229;ENSSSCG00000001232;ENSSSCG00000001233;ENSSSCG00000001234;ENSSSCG00000001235;ENSSSCG00000001236;ENSSSCG00000022261;ENSSSCG00000025208;ENSSSCG00000044574	Unknown;Unknown;TRIM26;TRIM10;TRIM15;TRIM40;TRIM31;RNF39;Unknown	245.62;0.02;10.21;0.85;1.61;1.29;0;2.04;0.38	64.52;0.15;14.07;0.77;2.63;1.72;0;9.85;0.19	0.16;-;0.56;0.05;0.82;0.53;-;2.43;-	0.0026823671153283;-;0.0078532130042749;0.88863425293609;0.0112946392600395;0.0346567777911566;-;1.30605290950118e-05;-
Muscle-restricted TAD boundary	8	17200000	17340000	0.2369	1.97983e-09	-1.13;-1.36;-1.92;-0.39;0.74;0.88;0.66	0.86;0.94;0.77;0.72;0.57;0.63;0.68	2;1.69;1.3;0.89;0.16;0.24;0.02	-	-	-	-	-	-
Muscle-restricted TAD boundary	8	28500000	28680000	0.322552	3.16034e-09	-2.63;-2.72;-2.79;-2.76;-2.68;-2.9;-2.81;-2.69;-2.68	0.05;0.04;0.25;0.16;0;0.18;0.09;0.08;0.17	3.32;3.32;3.46;3.41;3.32;3.29;3.29;3.4;3.5	-	-	-	-	-	-
Muscle-restricted TAD boundary	8	132900000	133080000	0.319417	6.50436e-11	3.78;3.8;3.51;2.11;1.5;0.56;0.21;4.4;0.89	0.89;0.73;0.68;0.85;0.48;0.15;0.15;0.72;0.29	2.88;3.06;2.83;1.25;1.01;0.4;0.06;3.67;0.6	-	-	-	-	-	-
Muscle-restricted TAD boundary	9	25840000	25980000	0.261184	9.39369e-09	-1.91;-0.37;0.77;0.33;1.67;2.38;1.82	-0.38;-0.49;0.97;0.16;0.07;0.77;0.38	0.46;0.11;0.19;0.49;1.6;1.61;1.44	-	-	-	-	-	-
Muscle-restricted TAD boundary	9	25840000	25980000	0.209229	1.77471e-09	-1.91;-0.37;0.77;0.33;1.67;2.38;1.82	-0.38;-0.49;0.97;0.16;0.07;0.77;0.38	0.46;0.11;0.19;0.49;1.6;1.61;1.44	-	-	-	-	-	-
Muscle-restricted TAD boundary	9	41160000	41300000	0.320561	7.92853e-08	1.56;1.72;1.79;1.84;1.86;2.08;2.33	1.9;1.82;1.85;1.8;1.65;1.67;1.97	0.33;0.09;0.05;0.04;0.21;0.4;0.35	-	-	-	-	-	-
Muscle-restricted TAD boundary	9	65580000	65860000	0.30131	9.34336e-06	2.48;2.48;2.92;3.16;3.76;3.83;3.84;3.79;4.02;4.94;5.19;4.98;3.46;4.61	3.4;3.31;3.45;3.74;3.74;3.83;4.09;3.77;4.01;4.66;4.71;4.31;3.58;4.48	0.91;0.82;0.53;0.58;0.01;0;0.24;0.01;0;0.27;0.47;0.67;0.12;0.13	ENSSSCG00000015288;ENSSSCG00000039446;ENSSSCG00000040824;ENSSSCG00000051647	RBBP5;Unknown;CNTN2;TMEM81	49.19;0;0.32;1.75	51.28;0;40.04;2.41	0.16;-;7.15;0.6	0.2884340996621;-;6.11541993201306e-45;0.278840547485389
Muscle-restricted TAD boundary	9	79380000	79560000	0.204956	2.35584e-07	-3.19;-3.21;-3.17;-3.22;-3.17;-3.38;-3.42;-3.45;-3.27	-1.64;-1.56;-1.5;-1.5;-1.79;-1.6;-1.7;-1.55;-1.52	2.45;2.34;2.33;2.28;2.62;2.22;2.27;2.1;2.25	-	-	-	-	-	-
Muscle-restricted TAD boundary	10	21320000	21460000	0.253218	1.51664e-09	-0.07;-0.03;-1.38;-1.4;-1.31;-1.13;-1.66	1.97;1.86;1.99;2.07;2.01;2.09;1.95	3.9;3.84;4.61;4.68;4.71;4.97;4.29	ENSSSCG00000036270	ATP6V1G3	0.57	0.21	1.56	0.17512
Muscle-restricted TAD boundary	10	22840000	23020000	0.208719	4.72137e-10	0.83;0.61;0.4;0.04;0.53;1.04;1.46;1.58;0.11	2.58;2.67;2.68;2.74;2.75;3.08;3.23;3.2;2.7	3.42;3.28;3.09;2.79;2.21;2.03;1.77;1.61;2.58	-	-	-	-	-	-
Muscle-restricted TAD boundary	10	41240000	41380000	0.31418	9.04423e-15	3.62;3.5;3.47;3.64;3.62;3.66;3.61	0.35;0.35;0.02;0.14;0.13;0.04;0.17	3.97;3.85;3.5;3.78;3.76;3.71;3.78	-	-	-	-	-	-
Muscle-restricted TAD boundary	10	45420000	45600000	0.232176	3.07622e-08	-1.76;-1.1;-2.44;-3.71;-3.31;-3.29;-3.05;-4.91;-3.93	-1.89;-1.85;-1.86;-1.85;-1.61;-1.57;-1.61;-1.6;-1.98	0.13;0.74;1.42;2.14;2.3;2.27;2.55;2.68;2.04	ENSSSCG00000022953	PTER	5.75	1.26	1.89	1.15076e-10
Muscle-restricted TAD boundary	10	47480000	47660000	0.233341	1.68389e-07	-1.83;-1.99;-0.12;-0.52;0.45;0.16;0.63;0.72;-0.86	0.33;0.25;0.3;0.1;0.05;0.15;0.11;0.18;0.11	1.84;1.76;1.57;1.38;0.39;0;0.52;0.53;1.02	-	-	-	-	-	-
Muscle-restricted TAD boundary	11	3000000	3140000	0.20361	9.52282e-09	3.65;3.88;3.53;3.22;3.21;3.26;3.55	2.68;2.91;2.48;2.67;2.52;2.93;2.42	0.97;0.96;1.04;0.55;0.68;0.32;1.12	ENSSSCG00000009293;ENSSSCG00000022678	SPATA13;AMER2	5.65;0.09	11.29;26.76	1.1;8.74	1.15861550910042e-06;4.58795715879788e-43
Muscle-restricted TAD boundary	11	13840000	14020000	0.243396	8.5121e-10	-0.07;-0.18;-0.84;0.49;0.44;1.86;1.78;1.53;-0.14	-0.25;-0.5;-1.96;-0.01;-0.38;-0.52;-0.22;-0.27;-0.02	0.18;0.31;0.88;1.5;2.07;3.35;3.56;3.27;0.12	ENSSSCG00000009364	FREM2	40.23	2.42	2.05	7.11682e-28
Muscle-restricted TAD boundary	11	33040000	33180000	0.264835	1.8038e-08	-0.3;-0.36;-0.58;-0.96;-0.89;0.83;0.76	-0.24;-0.53;-0.8;0.84;-0.98;-0.99;0.86	0.05;0.17;0.21;0.19;0.09;0.17;0.09	-	-	-	-	-	-
Muscle-restricted TAD boundary	13	5500000	5640000	0.240893	7.89016e-08	-2.2;-3.99;-2.03;-2.09;-3.78;-2.22;-3.66	-1.37;-1.47;-1.27;-1.48;-1.04;-1.58;-1.17	1.16;1.47;1.24;1.38;1.25;1.36;1.51	-	-	-	-	-	-
Muscle-restricted TAD boundary	13	17080000	17260000	0.272452	1.11568e-06	2.58;2.3;2.31;1.71;0.94;0.79;0.29;0.67;1.28	0.86;-0.98;0.74;0.66;0.54;0.56;0.73;0.6;0.32	3.44;3.32;3.06;2.38;1.48;1.36;1.02;1.28;1.61	ENSSSCG00000038607	GADL1	373.86	1.9	6.43	2.88952e-50
Muscle-restricted TAD boundary	13	23380000	23520000	0.250478	1.75023e-10	2.68;2.53;2.23;1.32;0.63;0.21;0.99	0.77;1.09;0.94;0.86;0.79;0.31;0.56	1.91;1.43;1.29;0.46;0.16;0.09;0.43	ENSSSCG00000011259	SCN5A	1.19	5.38	2.28	6.98611e-08
Muscle-restricted TAD boundary	13	26040000	26180000	0.233209	7.20445e-08	4.18;4.65;5.75;5.48;5.32;5.23;4.94	3.04;3.38;4.36;4.29;4.12;4.16;3.62	1.13;1.27;1.38;1.18;1.2;1.07;1.31	ENSSSCG00000011284;ENSSSCG00000027711;ENSSSCG00000034200	NKTR;SS18L2;SEC22C	69.11;452.64;26.54	62.65;81.29;36.08	0.04;1.62;0.53	0.747704732932829;5.22466510534064e-22;0.0333099956900251
Muscle-restricted TAD boundary	13	28320000	28460000	0.269037	2.51476e-08	2.41;2.46;2.66;3.01;3.36;2.99;3.23	2.63;2.71;3.05;3;3.32;3.1;3.38	0.22;0.25;0.39;0.01;0.04;0.1;0.14	ENSSSCG00000030575	TMEM158	1.77	13.57	3.1	6.42626e-22
Muscle-restricted TAD boundary	13	117340000	117520000	0.219416	3.60392e-11	0.58;1.96;2.12;2.27;1.81;1.27;1.2;1.51;1.37	0.25;0.99;1.08;1.57;1.15;0.89;1.11;1.42;1.09	0.83;0.97;1.04;0.7;0.66;0.38;0.08;0.08;0.27	ENSSSCG00000037583;ENSSSCG00000038443;ENSSSCG00000039285	GNB4;ZNF639;MFN1	40.33;51.3;90.33	161.33;20.79;60.82	2.08;0.79;0.47	3.94224721065749e-09;9.65264502486249e-06;0.0150199340820385
Muscle-restricted TAD boundary	13	118940000	119080000	0.246432	7.20923e-10	-0.28;-1.71;-1.35;-2.88;-2.88;-2.86;-1.1	-0.95;-0.51;-0.33;-0.14;-0.09;-0.19;-0.28	0.66;0.8;0.97;1.25;1.21;1.32;1.17	-	-	-	-	-	-
Muscle-restricted TAD boundary	13	196440000	196580000	0.324754	2.74521e-10	1.82;1.44;1.48;1.65;1.69;1.85;1.74	2.18;1.83;1.99;2.26;2.54;2.55;2.18	0.36;0.39;0.51;0.6;0.84;0.69;0.43	-	-	-	-	-	-
Muscle-restricted TAD boundary	13	202240000	202420000	0.233184	2.34382e-06	2.14;2.25;2.85;3.26;3.04;3.75;3.72;2.14;3.27	0.47;0.7;1.12;1.14;1.05;1.48;1.57;0.63;1.32	1.66;1.55;1.72;2.12;1.98;2.26;2.15;1.51;1.94	ENSSSCG00000022318	ERG	43.01	12.4	0.32	6.33737e-07
Muscle-restricted TAD boundary	13	203240000	203420000	0.208816	1.40838e-09	0.64;0.48;1.18;1.65;1.4;0.56;0.65;0.08;1	0.74;1.03;1.34;1.59;1.83;1.54;1.66;1.29;1.12	0.09;0.54;0.15;0.06;0.43;0.97;1;1.38;0.11	ENSSSCG00000012071;ENSSSCG00000037110	Unknown;PCP4	1.86;0.75	3.65;280.86	1.08;9.05	0.0293747126999962;5.30674522387702e-45
Muscle-restricted TAD boundary	13	204840000	205020000	0.208816	1.40838e-09	4.76;4.06;3.72;3.72;3.85;4.33;4.09;4.26;4.23	4.88;4.29;4.18;4.26;4.69;4.46;3.9;3.97;4.37	0.11;0.22;0.46;0.54;0.84;0.12;0.19;0.28;0.13	ENSSSCG00000012077;ENSSSCG00000020673;ENSSSCG00000024336;ENSSSCG00000036487	MX1;KRTAP9-1;TMPRSS2;KRTAP4-5	57.3;0;0.35;0	132.61;0;0.84;0	1.28;-;1.44;-	0.194702414671194;-;0.000432098306995428;-
Muscle-restricted TAD boundary	14	134500000	134680000	0.331052	3.25444e-11	4.26;3.63;3.36;3.11;2.91;2.49;2.24;2.33;2.73	3.11;2.7;2.51;2.56;2.6;2.55;2.37;2.48;2.48	1.14;0.92;0.84;0.54;0.3;0.05;0.13;0.15;0.24	ENSSSCG00000045428	Unknown	0	0	-	-
Muscle-restricted TAD boundary	14	140060000	140200000	0.253345	9.97059e-10	0.8;0.77;0.33;0.01;0.22;0.67;0.59	0.4;0.53;0.7;0.94;1.48;1.51;0.71	1.21;1.31;1.03;0.92;1.25;0.83;1.3	-	-	-	-	-	-
Muscle-restricted TAD boundary	15	84300000	84440000	0.431955	3.19191e-08	0.14;0.15;0.72;0.82;0.36;2.38;0.38	-0.26;-0.27;-0.11;-0.33;-0.62;-0.24;-0.26	1.6;1.89;2.61;2.49;1.75;4.14;2.12	ENSSSCG00000034677;ENSSSCG00000038561;ENSSSCG00000042430	TTN;Unknown;Unknown	84.45;8008.27;8560.26	1;1.28;1.51	5.69;11.48;11.6	7.50928922221888e-83;3.71402582037492e-285;5.91904821377852e-163
Muscle-restricted TAD boundary	15	84740000	84880000	0.431955	3.19191e-08	2.13;2.22;2.35;2.88;2.49;2.9;2.51	0.34;0.34;0.15;0.07;0.05;0.39;0.25	2.47;2.56;2.5;2.95;2.55;2.5;2.76	-	-	-	-	-	-
Muscle-restricted TAD boundary	16	17520000	17660000	0.321044	6.5827e-08	-2.72;-1.06;-1.36;-1.55;-1.82;-0.12;-1.35	0.09;0.05;0.55;0.51;0.71;0.88;0.43	3.19;2.88;2.08;1.94;1.47;1;2.22	ENSSSCG00000032931	CDH6	3.78	49.88	3.81	1.58965e-55
Muscle-restricted TAD boundary	16	72400000	72620000	0.215312	6.44338e-05	0.27;0.45;0.6;0.88;-0.51;-0.57;-0.63;-0.69;-0.56;-0.89;-0.23	0.62;0.47;0.36;0.61;0.97;-0.93;0.77;0.7;0.88;0.87;0.85	0.34;0.01;0.23;0.27;0.52;0.35;0.6;0.61;0.56;0.23;0.92	ENSSSCG00000017095	SEMA5A	29.02	43.7	0.68	0.000193484
Muscle-restricted TAD boundary	17	60540000	60720000	0.213017	1.28437e-08	0.33;0.26;0.12;0.44;0.46;0.45;1.12;0.44;0.87	1.1;1.19;1.24;1.16;1.31;1.34;1.47;1.09;1.39	0.76;0.93;1.12;0.71;0.85;0.88;0.35;0.65;0.52	-	-	-	-	-	-
Brain-restricted TAD boundary	1	4800000	4960000	-0.335041	1.35246e-08	3.85;3.91;2.93;3.5;3.38;3.72;2.93;3.64	2.09;2.07;1.59;2;2.29;2.54;2.01;2	1.76;1.83;1.34;1.49;1.09;1.17;0.92;1.63	ENSSSCG00000004029	QKI	403.7	468.52	0.3	0.256015
Brain-restricted TAD boundary	1	130980000	131120000	-0.208579	8.96654e-08	6.33;5.86;6.13;5.59;5.4;5.24;6.16	3.95;3.42;3.51;2.98;2.97;2.74;3.32	2.37;2.44;2.61;2.61;2.43;2.5;2.83	ENSSSCG00000004779;ENSSSCG00000004781	PLCB2;PAK6	1.3;0.52	2.79;53.37	1.2;6.82	7.89452924343419e-05;2.37112192706342e-110
Brain-restricted TAD boundary	1	200860000	201000000	-0.26282	0.001755	-1.26;-0.19;-0.82;-1.1;-2.34;-3.57;-0.51	-0.16;-0.92;0.53;-0.98;-0.11;-1.54;0.24	0.9;0.73;0.65;1.87;1.77;1.96;1.73	ENSSSCG00000005135;ENSSSCG00000041931	MTAP;Unknown	26.18;2.33	9.62;1.74	0.65;0.3	1.02024860623457e-12;0.436867162174253
Brain-restricted TAD boundary	1	257880000	258020000	-0.263314	1.32514e-09	-2.56;-2.5;-2.7;-2.81;-2.85;-2.59;-1.02	-0.51;-0.56;-0.59;-0.83;0.63;0.49;-0.62	1.95;2.06;1.88;2.01;2.52;2.92;1.59	-	-	-	-	-	-
Brain-restricted TAD boundary	2	95260000	95440000	-0.330843	3.12013e-12	-4.64;-3.07;-3.03;-4.99;-3.05;-4.97;-3.04;-4.68;-3.02	-1.16;-1.99;-0.49;-0.14;-1.87;-1.85;-0.15;-1.5;-0.36	2.52;2.91;3.45;3.15;2.81;2.88;3.1;2.82;3.33	-	-	-	-	-	-
Brain-restricted TAD boundary	2	147420000	147600000	-0.281072	1.31642e-09	0.6;0.79;1;1.19;1.53;3.04;2.98;0.41;1.88	-1.91;-0.15;-0.65;0.98;0.64;0.54;0.73;-1.81;0.08	2.69;2.65;2.35;2.17;2.17;2.49;2.24;2.61;1.8	ENSSSCG00000014408;ENSSSCG00000014411;ENSSSCG00000014414	PLAC8L1;LARS1;RBM27	1.33;132.71;36.02	2.34;78.14;30.88	1.06;0.65;0.12	0.0629695685270765;0.00210431939267299;0.393463126955074
Brain-restricted TAD boundary	2	148580000	148780000	-0.284378	9.7771e-09	-2.26;-2.44;-1.85;-0.76;0.76;-0.92;0.73;-0.87;-2.91;-0.77	-1.93;-0.13;-0.64;0.75;0.62;0.72;0.49;0.82;-0.27;0.72	1.66;1.69;0.78;0.49;0.14;0.35;0.24;0.3;1.35;0.5	ENSSSCG00000036549	DPYSL3	43	113.58	1.5	4.04007e-05
Brain-restricted TAD boundary	2	149000000	149140000	-0.424022	3.0019e-11	-4.27;-4.15;-5.94;-5.62;-5.51;-5.2;-5.96	-0.82;-0.76;-0.04;-1.58;-1.32;-1.18;-0.91	4.55;4.6;4.1;3.95;3.8;3.98;4.94	ENSSSCG00000014420;ENSSSCG00000024111;ENSSSCG00000034511	JAKMIP2;SCGB3A2;SPINK1	0.86;0.53;0	47.78;0.17;0.02	5.91;0.33;-	6.05252359754006e-142;0.240491831722713;-
Brain-restricted TAD boundary	3	1760000	1900000	-0.200525	4.32125e-09	4.31;4.79;4.64;4.73;4.26;4.19;4.46	3.28;4.04;3.89;3.8;3.68;3.56;3.75	1.03;0.75;0.74;0.93;0.58;0.62;0.71	ENSSSCG00000007565;ENSSSCG00000007569;ENSSSCG00000007572	TTYH3;GRIFIN;LFNG	16.57;6.77;15.83	62.78;0.04;56.21	2.02;7.92;1.94	3.83584444188046e-18;2.97426685135043e-11;3.53263339061644e-16
Brain-restricted TAD boundary	3	47980000	48120000	-0.287315	1.68359e-07	-3.77;-3.78;-3.97;-2.35;-2.64;-2.12;-3.63	-0.2;-0.31;-0.52;-0.7;0.94;-0.66;-0.26	2.42;2.52;2.55;2.35;2.42;2.53;2.62	ENSSSCG00000008140	SLC5A7	0.01	4.24	10.11	1.61697e-06
Brain-restricted TAD boundary	3	49380000	49560000	-0.231161	2.74001e-11	0.72;0.77;1.14;1.6;0.81;0.04;0.35;0.75;0.56	0.32;0.87;1.34;1.9;1.13;0.72;0.44;0.52;0.26	0.4;0.1;0.19;0.3;0.32;0.76;0.79;0.22;0.83	ENSSSCG00000024636;ENSSSCG00000035390	TGFBRAP1;C2ORF49	14.93;22.32	12.74;22.45	0.11;0.11	0.500035546576569;0.575883569623368
Brain-restricted TAD boundary	3	79060000	79240000	-0.218833	1.55812e-08	-0.07;-0.18;-0.39;-0.43;-0.67;0.79;0.65;0.54;-0.98	-0.85;-0.89;-0.97;0.9;0.58;0.39;0.51;0.37;0.31	0.78;0.7;0.58;0.66;0.75;0.39;0.13;0.16;0.7	-	-	-	-	-	-
Brain-restricted TAD boundary	3	79060000	79240000	-0.328607	1.30252e-11	-0.07;-0.18;-0.39;-0.43;-0.67;0.79;0.65;0.54;-0.98	-0.85;-0.89;-0.97;0.9;0.58;0.39;0.51;0.37;0.31	0.78;0.7;0.58;0.66;0.75;0.39;0.13;0.16;0.7	-	-	-	-	-	-
Brain-restricted TAD boundary	3	131160000	131300000	-0.205617	1.29394e-08	-1.81;-0.45;0.84;2.61;4.01;4.43;0.14	0.58;0.04;2.31;3.49;5.23;4.87;1.45	1.61;1.51;1.46;0.87;1.22;0.44;1.59	ENSSSCG00000008651;ENSSSCG00000025305;ENSSSCG00000025629;ENSSSCG00000029161	DCDC2C;RNASEH1;COLEC11;ADI1	0.29;36.28;0.11;94.15	0.54;14.42;3.65;19.93	1.11;0.78;5.5;1.87	0.0801253686587702;6.94633626715337e-07;5.50810724731493e-17;3.33889727502489e-20
Brain-restricted TAD boundary	3	132220000	132480000	-0.427494	6.7396e-13	1.97;3.31;3.91;4.69;4.28;4.52;4.66;4.11;4.26;1.82;1.32;2.48;3.91	1.82;3.51;3.55;3.97;4.06;3.66;4.2;4.68;6.66;2.91;2.13;2.44;3.74	0.14;0.19;0.36;0.72;0.21;0.86;0.46;0.57;2.4;1.09;0.8;0.04;0.16	ENSSSCG00000029570;ENSSSCG00000033193	PXDN;TPO	52.99;0.13	2.25;0	3.55;-	2.72101532765728e-62;-
Brain-restricted TAD boundary	4	340000	520000	-0.223352	0.000156023	5.09;4.49;4.1;4.28;4.86;4.16;4.49;4.29;4.19	3.33;2.95;2.62;2.71;2.98;2.62;2.82;2.51;2.69	1.75;1.53;1.48;1.56;1.88;1.53;1.67;1.78;1.49	ENSSSCG00000005904;ENSSSCG00000005905;ENSSSCG00000005907;ENSSSCG00000005908;ENSSSCG00000005909;ENSSSCG00000005910;ENSSSCG00000005917;ENSSSCG00000005918;ENSSSCG00000025116;ENSSSCG00000025879;ENSSSCG00000034551;ENSSSCG00000046182	VPS28;SLC39A4;ADCK5;SLC52A1;FBXL6;TMEM249;HSF1;DGAT1;TONSL;SCRT1;SCX;CPSF1	19.72;0.1;10.98;9.93;10.53;2.05;22.38;7.16;6.56;0;3.43;106.18	26.36;0.31;12.53;13.44;10.41;4.47;13.37;7.33;2.44;16.9;0.22;54.27	0.52;-;0.31;0.55;0.09;1.29;0.62;0.13;0.67;11.2;3.58;0.85	0.00339943383799383;-;0.325836950823283;0.095836364202436;0.730675043958522;0.00157291381152554;0.0996968632756832;0.512142099919106;4.27856459911309e-05;2.70986751110042e-24;2.17281549102223e-07;0.00822007018157325
Brain-restricted TAD boundary	4	620000	820000	-0.223352	0.000156023	4.35;3.98;3.87;4.25;4.55;3.69;3.91;4.73;4.08;4.34	2.31;2.44;2.34;2.41;2.56;2.11;2.34;2.79;2.51;2.75	2.03;1.53;1.53;1.83;1.98;1.58;1.57;1.93;1.56;1.58	ENSSSCG00000005911;ENSSSCG00000005922;ENSSSCG00000005923;ENSSSCG00000005925;ENSSSCG00000032796;ENSSSCG00000038025;ENSSSCG00000038800;ENSSSCG00000039094	OPLAH;Unknown;SPATC1;EXOSC4;GRINA;NRBP2;PUF60;PLEC	35.81;0.24;0.03;32.76;8.39;13.73;146.55;182.3	5.68;0.65;1.3;18.01;118;31.3;73.88;31.59	1.47;1.54;5.8;0.74;3.92;1.29;0.87;1.58	8.04096393317225e-11;0.039133300331801;4.48372341428345e-06;0.0345975011733934;1.57910570310772e-49;8.29592159597137e-14;2.48249110845983e-06;3.94689189594984e-14
Brain-restricted TAD boundary	4	1380000	1520000	-0.296449	1.53595e-08	3.14;3.03;3.03;4.08;3.81;4.16;3.7	2.03;2.08;1.95;2.56;2.21;2.27;2.14	1.11;0.94;1.07;1.52;1.6;1.88;1.55	ENSSSCG00000031724;ENSSSCG00000032063;ENSSSCG00000033594;ENSSSCG00000035372;ENSSSCG00000037524;ENSSSCG00000037975;ENSSSCG00000038965;ENSSSCG00000049907	LYNX1;THEM6;LY6K;PSCA;LY6D;JRK;ARC;SLURP1	14.83;0.43;0.1;0.13;0;8.01;0.21;0	155.26;24.13;0.01;0.81;0;6.81;44.72;0.12	3.47;6.04;-;3.73;-;0.1;7.94;-	1.59012347598933e-21;1.96040083652845e-43;-;0.00730437100964108;-;0.738665196314649;1.3823234926111e-70;-
Brain-restricted TAD boundary	4	1380000	1520000	-0.258315	4.80945e-07	3.14;3.03;3.03;4.08;3.81;4.16;3.7	2.03;2.08;1.95;2.56;2.21;2.27;2.14	1.11;0.94;1.07;1.52;1.6;1.88;1.55	ENSSSCG00000031724;ENSSSCG00000032063;ENSSSCG00000033594;ENSSSCG00000035372;ENSSSCG00000037524;ENSSSCG00000037975;ENSSSCG00000038965;ENSSSCG00000049907	LYNX1;THEM6;LY6K;PSCA;LY6D;JRK;ARC;SLURP1	14.83;0.43;0.1;0.13;0;8.01;0.21;0	155.26;24.13;0.01;0.81;0;6.81;44.72;0.12	3.47;6.04;-;3.73;-;0.1;7.94;-	1.59012347598933e-21;1.96040083652845e-43;-;0.00730437100964108;-;0.738665196314649;1.3823234926111e-70;-
Brain-restricted TAD boundary	4	1540000	1720000	-0.258315	4.80945e-07	3.67;3.7;3.48;3.25;3.19;3.3;3.77;3.6;3.48	2.16;2.07;2.14;2.19;2.09;2.04;2.29;1.85;2.1	1.51;1.63;1.33;1.06;1.09;1.26;1.47;1.74;1.37	ENSSSCG00000033726;ENSSSCG00000035891;ENSSSCG00000036022;ENSSSCG00000050724	Unknown;ADGRB1;TSNARE1;Unknown	0.03;0.9;2.66;0	0;53.13;3.33;0	-;6;0.43;-	-;2.81500706535627e-52;0.241310764312884;-
Brain-restricted TAD boundary	4	4960000	5140000	-0.259304	5.06016e-14	-4.59;-3.03;-3.01;-4.85;-4.89;-4.82;-4.77;-4.82;-4.85	0.67;0.46;0.72;-0.97;-0.97;0.94;-0.9;0.66;0.87	4.74;4.51;4.26;4.11;4.07;4.23;4.13;4.51;4.28	-	-	-	-	-	-
Brain-restricted TAD boundary	4	17900000	18040000	-0.219659	3.83541e-05	0.04;0.26;0.73;0.97;0.85;0.96;0.52	0.59;0.69;-0.9;-0.7;-0.63;-0.76;-0.96	0.64;0.43;0.37;0.33;0.52;0.28;0.51	-	-	-	-	-	-
Brain-restricted TAD boundary	4	33340000	33480000	-0.25631	8.79879e-12	-1.09;-1.34;-1.68;-1.54;-2.92;-2.53;-1.17	-0.89;0.68;0.59;0.61;-0.91;-0.68;0.69	1.8;1.98;1.72;1.84;1.99;2.14;2.14	-	-	-	-	-	-
Brain-restricted TAD boundary	4	40840000	41020000	-0.209572	1.87017e-07	-1.75;-1.77;-1.21;-1.17;-2.98;-2.9;-2.75;-2.53;-1.57	-1.82;-1.84;-1.86;-1.83;-1.66;-1.73;-1.96;-1.9;-1.92	0.06;0.07;0.64;0.66;0.68;0.82;1.21;1.36;0.35	-	-	-	-	-	-
Brain-restricted TAD boundary	4	75860000	76000000	-0.228085	1.2019e-06	0.63;0.57;0.53;1.01;0.86;0.17;0.63	0.27;0.08;0.05;0.09;0.23;0.69;0.21	0.35;0.49;0.59;0.91;0.62;0.51;0.42	ENSSSCG00000006250;ENSSSCG00000006251;ENSSSCG00000006252	LYN;TGS1;TMEM68	15.29;17.86;33.8	10.55;10.9;58.9	0.44;0.6;0.9	0.050821131246441;0.00029174484846746;4.0357921825056e-07
Brain-restricted TAD boundary	4	113240000	113380000	-0.245157	5.8905e-10	-5.43;-5.42;-5.39;-5.25;-5.12;-5.28;-5.46	-3.92;-3.75;-3.6;-3.45;-3.39;-3.2;-3.79	2.48;2.32;2.21;2.2;2.27;1.91;2.33	-	-	-	-	-	-
Brain-restricted TAD boundary	4	121580000	121760000	-0.216523	1.0213e-05	-4.22;-4.33;-4.36;-4.37;-4.38;-4.45;-4.56;-4.55;-4.38	-1.15;-1.22;-1.15;-1.26;-1.27;-1.24;-1.33;-1.12;-1.32	2.93;2.89;2.78;2.89;2.89;2.79;2.77;2.56;2.94	-	-	-	-	-	-
Brain-restricted TAD boundary	5	10420000	10560000	-0.210479	2.30041e-08	5;4.67;4.58;4.54;4.36;4.45;4.41	3.41;3.46;3.22;3.46;3.12;3.05;3.06	1.58;1.2;1.35;1.08;1.24;1.4;1.34	ENSSSCG00000000130;ENSSSCG00000000131;ENSSSCG00000021944	CYTH4;ELFN2;RAC2	5.47;0.02;7.65	7.36;31.83;3.16	0.51;12.72;0.82	0.123647141299006;2.77507471017317e-33;0.000474128843381488
Brain-restricted TAD boundary	5	19360000	19520000	-0.351748	1.02494e-10	3.52;3.5;3.67;4.27;4.92;4.8;4.11;3.56	0.06;0.72;0.62;0.68;1.07;0.9;0.41;0.3	3.59;2.77;3.04;3.58;3.84;3.9;3.7;3.25	ENSSSCG00000000288;ENSSSCG00000000289;ENSSSCG00000024221;ENSSSCG00000039191	HNRNPA1;NFE2;SMUG1;CBX5	458.05;0.82;11.8;88.64	229.66;0.21;10.37;123.95	0.89;1.93;0.07;0.57	1.26744555301983e-07;0.00149931829035707;0.708839407601927;0.00303119041259339
Brain-restricted TAD boundary	5	23860000	24040000	-0.231273	9.56083e-10	-2.54;-2.55;-2.43;-2.68;-2.67;-2.75;-2.53;-2.73;-2.71	-3.14;-3.21;-3.32;-3.22;-3.21;-3.59;-3.26;-3.39;-3.39	1.39;1.33;1.11;1.45;1.45;1.15;1.26;1.34;1.31	-	-	-	-	-	-
Brain-restricted TAD boundary	5	35680000	35820000	-0.224851	0.00425202	0.9;0.16;0.37;0.24;0.33;0.96;0.86	-0.53;-1.85;-1.43;-1.97;-1.84;-1.41;-1.42	2.38;2.32;2.2;1.78;1.82;1.62;1.71	ENSSSCG00000000510	TMEM19	143.53	115.68	0.22	0.315585
Brain-restricted TAD boundary	5	40340000	40520000	-0.343674	3.50538e-07	-3.29;-3.47;-2.01;-2.08;-3.66;-3.47;-3.53;-3.39;-3.3	-2.75;-2.9;-1.29;-1.27;-2.42;-2.33;-2.32;-2.73;-2.4	1.46;1.42;1.27;1.19;0.76;0.86;0.79;1.34;1.09	ENSSSCG00000026719	ALG10B	26.93	36.15	0.52	0.0365803
Brain-restricted TAD boundary	5	42140000	42320000	-0.279455	4.5471e-07	-2.78;-2.79;-2.78;-2.6;-2.6;-1.23;-1.58;-1.35;-2.77	-0.37;-1.84;-1.91;-1.13;-1.29;-1.78;-0.39;-1.97;-1.42	1.59;1.05;1.13;0.52;0.68;0.55;0.81;0.61;0.64	ENSSSCG00000000531;ENSSSCG00000030616	BICD1;RESF1	2.19;39.35	23.94;22.79	3.54;0.69	4.45016617710571e-36;0.0194380200194933
Brain-restricted TAD boundary	5	45680000	45820000	-0.323899	4.304e-08	-3.45;-3.53;-3.63;-3.86;-3.88;-3.7;-3.75	-3.8;-2.06;-2.34;-2.69;-1.03;-2.71;-2.74	0.34;0.52;0.71;0.83;1.15;1.01;0.98	ENSSSCG00000036893	PTHLH	0.86	6.33	3.08	8.40114e-07
Brain-restricted TAD boundary	5	85700000	85880000	-0.277185	1.82651e-08	-2.67;-2.36;-2.34;-2.54;-2.63;-2.58;-2.26;-2.49;-2.37	-1.81;-1.94;-1.79;-0.04;-0.08;-0.09;-1.81;-1.86;-2	1.14;1.57;1.45;1.5;1.44;1.5;1.54;1.36;1.63	-	-	-	-	-	-
Brain-restricted TAD boundary	6	15260000	15400000	-0.374968	5.7614e-07	-2.54;-2.2;-2.02;-2.1;-2.23;-3.86;-2.34	0.56;0.7;0.16;0.93;0.97;-0.51;0.64	2.89;3.1;3.81;2.97;2.8;2.64;3.01	ENSSSCG00000002747;ENSSSCG00000045697	PMFBP1;Unknown	0.3;0	0.81;16.83	1.54;8.1	0.000510427815496381;1.18881214198811e-11
Brain-restricted TAD boundary	6	48940000	49140000	-0.2154	6.56454e-06	5.62;5.51;5.68;4.76;4.81;4.7;4.57;4.47;4.48;4.71	5.09;4.92;5.23;4.4;4.57;4.36;4.43;4.35;4.13;4.42	0.52;0.58;0.44;0.36;0.23;0.34;0.13;0.12;0.35;0.28	ENSSSCG00000002993;ENSSSCG00000002994;ENSSSCG00000002995;ENSSSCG00000002996;ENSSSCG00000002997;ENSSSCG00000002998;ENSSSCG00000003000;ENSSSCG00000028627;ENSSSCG00000040533;ENSSSCG00000041114	CYP2A19;CYP2F1;EGLN2;RAB4B-EGLN2;MIA;SNRPA;ITPKC;Unknown;C19ORF54;EGLN2	1.93;0;4.24;25.97;2.11;24.14;7.76;0;11.53;64.57	3.93;0;7.9;58.38;2.95;20.59;3.34;0;4.02;70.8	1.16;-;1;1.27;0.59;0.11;0.9;-;0.59;0.24	NA;-;0.00314161932151844;2.00709556004536e-07;0.432372614371717;0.681825196532176;1.69471578585867e-07;-;0.00055624669349872;0.375393369827349
Brain-restricted TAD boundary	6	65760000	65900000	-0.432487	9.89396e-14	-1.26;-1.25;-1.46;-1.38;-1.11;-1.08;-1.43	0.68;0.45;0.41;0.68;0.68;0.99;0.65	3.43;3.21;2.95;3.3;3.57;3.92;3.23	ENSSSCG00000031344	AJAP1	0.22	37.67	7.88	3.44868e-66
Brain-restricted TAD boundary	6	65760000	65900000	-0.340965	2.60422e-10	-1.26;-1.25;-1.46;-1.38;-1.11;-1.08;-1.43	0.68;0.45;0.41;0.68;0.68;0.99;0.65	3.43;3.21;2.95;3.3;3.57;3.92;3.23	ENSSSCG00000031344	AJAP1	0.22	37.67	7.88	3.44868e-66
Brain-restricted TAD boundary	6	71900000	72040000	-0.336001	7.15142e-11	4.26;4.2;4.98;5.48;4.98;5.34;4.21	4.11;4.17;4.41;5.09;4.47;4.68;3.92	0.14;0.02;0.57;0.39;0.5;0.65;0.28	ENSSSCG00000003431;ENSSSCG00000003432;ENSSSCG00000003433;ENSSSCG00000003434	NPPB;KIAA2013;PLOD1;MFN2	0.83;83.02;101.95;147.73	2.17;37.15;33.79;42.01	1.63;0.96;0.51;0.29	0.0125861691408509;6.66644513870675e-05;1.81833314440937e-14;8.27024119482144e-24
Brain-restricted TAD boundary	6	90360000	90540000	-0.215037	3.2543e-14	-1.15;-1.27;-1.52;-1.19;-1.05;-1.2;-2.74;-2.86;-1.2	0.29;0.38;0.37;0.26;0.22;0.02;0.13;0.21;0.5	3.14;3.12;2.85;3.07;3.18;2.83;3.13;2.92;3.3	ENSSSCG00000003623;ENSSSCG00000049113	C1ORF94;Unknown	0;0.1	0.17;16.76	-;8.2	-;8.02919724839364e-26
Brain-restricted TAD boundary	6	90960000	91100000	-0.215037	3.2543e-14	0.91;0.54;0.36;0.68;0.98;-0.87;1.61	1.41;1.6;2.28;2.34;2.39;1.21;2.89	2.33;2.15;1.91;1.66;1.4;2.34;1.28	ENSSSCG00000003585;ENSSSCG00000035068;ENSSSCG00000038677;ENSSSCG00000039983	GJB5;GJB4;GJB3;GJA4	0;0;0.4;24.33	0.06;0;0.35;3.83	-;-;-;1.43	-;-;-;5.99637053653999e-14
Brain-restricted TAD boundary	6	91240000	91420000	-0.215037	3.2543e-14	2.72;3.12;3.61;4.05;4.15;4.08;4.72;4.84;3.91	2.81;2.95;3.44;3.53;3.34;3.47;3.69;3.97;3.3	0.09;0.16;0.16;0.51;0.8;0.61;1.02;0.87;0.61	ENSSSCG00000032016;ENSSSCG00000034292;ENSSSCG00000034618;ENSSSCG00000035690;ENSSSCG00000046350	FARSB;ZMYM1;ZMYM6;SFPQ;Unknown	14.04;17.87;25.32;166.75;2.67	8.46;10.13;23;124.74;3.17	0.62;0.72;0.03;0.31;0.35	0.0313425759908241;5.99436512326633e-06;0.81059198185601;0.131973082192824;0.328618308942052
Brain-restricted TAD boundary	6	93540000	93800000	-0.215037	3.2543e-14	4.71;4.06;4.44;4.15;3.77;3.1;2.81;3.14;3.82;3.23;2.86;4.4;2.83	4.9;4.41;4.82;4.41;4.22;3.81;3.71;3.69;4.51;3.84;3.69;4.67;3.6	0.19;0.34;0.38;0.26;0.44;0.71;0.9;0.55;0.68;0.61;0.83;0.26;0.76	ENSSSCG00000029991;ENSSSCG00000031631;ENSSSCG00000032240;ENSSSCG00000032909;ENSSSCG00000034611;ENSSSCG00000037815;ENSSSCG00000039034;ENSSSCG00000039905	SNIP1;GNL2;RSPO1;CDCA8;MEAF6;ZC3H12A;DNALI1;C1ORF109	21.14;38.63;0.61;4.91;42.04;3.73;0.65;30.67	11;16.38;1.1;1.94;81.31;0.72;1.47;10.98	0.83;0.88;0.99;0.71;1.04;1.74;1.29;0.63	2.2357753637193e-07;7.47124252023488e-07;0.0762450122069928;0.154640865724838;2.47077996441678e-10;6.30946880350834e-17;3.3884653310208e-05;1.18397228870877e-12
Brain-restricted TAD boundary	6	115320000	115520000	-0.229227	1.25937e-06	-4.8;-3.1;-3.22;-3.37;-3.34;-3.45;-3.52;-3.41;-3.45;-4.8	-3.9;-2.2;-2.26;-2.47;-2.43;-2.56;-2.72;-2.48;-2.97;-2.01	1.1;1.09;1.03;1.1;1.09;1.1;1.2;1.07;1.51;1.2	ENSSSCG00000022739;ENSSSCG00000023686;ENSSSCG00000027160	DSG2;TTR;DSG3	1.71;4.04;0.1	2.39;4.81;0.19	0.57;0.36;-	0.0317962343863833;0.310659149573777;-
Brain-restricted TAD boundary	6	154860000	155040000	-0.230776	9.13141e-11	-5.83;-5.82;-5.81;-5.78;-5.76;-5.74;-5.82;-5.7;-5.86	-1.95;-0.02;-0.17;-0.67;-0.69;-0.61;-0.86;-0.86;-0.5	4.11;4.2;4.36;4.89;4.92;4.87;5.03;5.15;4.64	ENSSSCG00000003833	DAB1	1.32	46.62	5.27	9.27525e-100
Brain-restricted TAD boundary	8	17720000	17900000	-0.244213	2.45014e-11	1.07;1.21;1.71;1.09;1.17;2.03;2.4;2.09;1.49	0.54;0.62;0.19;0.6;0.57;0.14;0.08;0.17;0.4	1.62;1.84;1.91;1.7;1.75;1.88;2.32;2.27;1.9	-	-	-	-	-	-
Brain-restricted TAD boundary	8	63560000	63740000	-0.248121	6.84793e-10	0.45;0.46;0.85;-0.83;-0.71;-0.57;-0.34;0.61;-0.32	2;2.32;1.74;1.47;1.42;1.38;1.25;2.17;1.2	2.46;2.78;2.6;2.64;2.72;2.82;2.92;2.78;2.89	ENSSSCG00000008919	EPHA5	1.54	98.36	6.09	3.70684e-35
Brain-restricted TAD boundary	8	119300000	119440000	-0.204386	6.80761e-10	1.06;1.68;2.12;2.12;2.39;3.26;2.82	0.11;0.26;0.36;0.54;0.49;1.56;0.75	1.18;1.42;1.75;1.57;1.9;1.69;2.06	ENSSSCG00000009172;ENSSSCG00000048657	PPP3CA;Unknown	219.95;0.64	412.6;1.41	1;1.26	4.73470037622468e-10;0.000991215711570877
Brain-restricted TAD boundary	9	24560000	24700000	-0.248867	1.02716e-09	-2.03;-2.03;-2.19;-2.29;-2.29;-2.56;-2.27	-0.38;-0.3;-0.56;-0.53;-0.35;-0.45;-0.37	2.34;2.27;2.36;2.24;2.06;1.88;2.1	-	-	-	-	-	-
Brain-restricted TAD boundary	9	26020000	26160000	-0.209229	1.77471e-09	0.91;0.59;0.54;2.21;2.43;2.86;1.03	0.03;0.31;0.18;1.69;1.7;2.12;0.42	0.88;0.9;0.73;0.52;0.72;0.73;0.61	ENSSSCG00000014946	CEP295	31.12	26.66	0.12	0.328085
Brain-restricted TAD boundary	9	41320000	41460000	-0.320561	7.92853e-08	2.99;3.19;3.61;4.36;4.03;4.29;4.44	2.36;2.49;2.93;3.56;2.91;2.83;3.33	0.62;0.69;0.68;0.79;1.12;1.45;1.1	ENSSSCG00000015049;ENSSSCG00000015050;ENSSSCG00000015051	TMPRSS5;ZW10;CLDN25	2.13;69.54;0.26	3.22;26.17;0.41	0.73;0.69;-	0.175703385682604;5.44420097513146e-08;-
Brain-restricted TAD boundary	9	65400000	65560000	-0.30131	9.34336e-06	2.3;2.3;2.33;2.49;2.5;2.41;2.48;2.35	3.29;3.21;3.08;3.17;3.42;3.42;3.25;3.36	0.99;0.9;0.74;0.68;0.92;1.01;0.77;1.01	ENSSSCG00000022951	NFASC	1.17	172.49	7.31	1.57832e-89
Brain-restricted TAD boundary	10	44460000	44640000	-0.281174	4.2493e-07	-1.23;-1.2;-1.21;-1.2;-1.29;-1.36;-1.58;-1.93;-1.08	-1.95;-0.02;-0.09;-0.28;-0.09;-0.21;-0.12;-0.09;-0.15	0.72;0.82;0.87;1.08;0.8;0.85;0.54;0.16;1.06	-	-	-	-	-	-
Brain-restricted TAD boundary	10	44460000	44640000	-0.204039	6.55257e-09	-1.23;-1.2;-1.21;-1.2;-1.29;-1.36;-1.58;-1.93;-1.08	-1.95;-0.02;-0.09;-0.28;-0.09;-0.21;-0.12;-0.09;-0.15	0.72;0.82;0.87;1.08;0.8;0.85;0.54;0.16;1.06	-	-	-	-	-	-
Brain-restricted TAD boundary	10	47820000	48000000	-0.204965	3.92267e-09	1.08;0.98;0.63;0.73;1.07;1.16;1.18;1.1;1.21	0.34;0.33;0.17;0.33;0.34;0.48;0.5;0.42;0.59	0.74;0.65;0.45;0.39;0.72;0.67;0.68;0.67;0.62	-	-	-	-	-	-
Brain-restricted TAD boundary	10	60740000	60920000	-0.295144	1.97574e-05	0.98;0.71;0.73;0.33;0.49;0.06;0.5;0.43;0.85	-0.68;-0.74;-0.85;-0.54;-0.65;-0.57;-0.4;-0.25;-0.75	2.31;1.97;1.89;1.8;1.84;1.36;1.09;1.31;2.1	-	-	-	-	-	-
Brain-restricted TAD boundary	11	3140000	3280000	-0.20361	9.52282e-09	3.31;3.58;4.07;4.5;3.87;3.11;3.18	2.83;2.87;3.45;3.43;2.95;2.24;2.97	0.48;0.71;0.62;1.07;0.91;0.86;0.21	ENSSSCG00000035119;ENSSSCG00000035318;ENSSSCG00000035421	MTMR6;NUP58;ATP8A2	41.67;69.5;0.85	76.01;49.35;31.55	0.97;0.38;5.32	1.50726714383135e-17;0.0378006682856159;1.0019796225493e-92
Brain-restricted TAD boundary	11	33240000	33380000	-0.264835	1.8038e-08	2.37;2.31;1.2;1.18;1.26;1.35;1.39	2.14;2.14;0.76;0.55;0.81;0.7;0.81	0.23;0.17;0.44;0.63;0.44;0.64;0.58	ENSSSCG00000009449	TDRD3	56.16	28.15	0.9	8.30198e-06
Brain-restricted TAD boundary	11	61400000	61540000	-0.240698	9.43137e-06	-4.26;-4.22;-4.35;-4.65;-4.66;-4.51;-4.37	-1.83;-1.86;-1.91;-0.43;-0.34;-0.3;-1.98	3.56;3.63;3.55;3.77;3.67;3.79;3.61	-	-	-	-	-	-
Brain-restricted TAD boundary	11	78640000	78780000	-0.249338	4.28521e-06	4.62;4.15;4.27;4.08;4.22;3.83;3.88	3.56;3.57;3.8;3.41;3.59;3.47;3.07	1.06;0.57;0.46;0.67;0.62;0.36;0.8	ENSSSCG00000009560;ENSSSCG00000009563;ENSSSCG00000024103;ENSSSCG00000026536;ENSSSCG00000048674	TFDP1;TMCO3;Unknown;DCUN1D2;Unknown	32.5;18.23;237.91;37.91;18.78	17.35;21.15;0.41;25.68;0.02	0.79;0.32;8.76;0.45;8.04	0.000133944945004992;0.0866920543511094;1.6833712231673e-94;0.043637367620313;1.04284142116224e-54
Brain-restricted TAD boundary	12	15380000	15560000	-0.22453	2.07663e-07	2.65;2.41;2.47;2.32;1.53;1.43;1.45;1.43;1.83	2.21;2.08;2.15;1.9;1.24;1.21;1.18;1.2;1.36	0.43;0.32;0.31;0.41;0.29;0.21;0.27;0.22;0.47	ENSSSCG00000017296;ENSSSCG00000017297;ENSSSCG00000023612	ACE;CYB561;Unknown	21.81;8.97;0.56	10.39;27.22;0.05	0.95;1.72;2.3	0.00011490993883382;1.1682845276131e-08;0.000511806795574241
Brain-restricted TAD boundary	12	18380000	18520000	-0.213697	4.00732e-08	4.07;4.31;4.31;4.14;4.84;4.6;4.58	4.14;4.28;4.36;4.16;5.03;4.56;4.67	0.06;0.03;0.04;0.02;0.18;0.04;0.09	ENSSSCG00000017342;ENSSSCG00000017343;ENSSSCG00000017344;ENSSSCG00000017345;ENSSSCG00000017346;ENSSSCG00000039101	KIF18B;GFAP;FAM187A;CCDC103;EFTUD2;C1QL1	1.99;3.67;0.06;0;94.77;0.5	1.7;547.7;0.39;0.19;49.23;18.8	0.17;7.33;-;-;0.83;5.7	0.804554917848695;1.82793454257609e-176;-;-;9.50292701273341e-07;2.7198655967021e-35
Brain-restricted TAD boundary	12	21520000	21700000	-0.262482	2.45395e-08	-1.43;-1.77;-0.01;-0.05;-0.25;-0.79;-0.62;-0.55;-0.44	-0.14;-0.61;0.92;-0.79;0.81;0.41;0.94;0.98;0.73	0.7;0.84;1.06;0.73;0.94;0.79;0.43;0.47;0.83	ENSSSCG00000017459;ENSSSCG00000017460;ENSSSCG00000017461;ENSSSCG00000017462;ENSSSCG00000017463;ENSSSCG00000024067;ENSSSCG00000028522	KRT20;KRT12;KRT28;KRT27;KRT26;KRT23;KRT10	0.58;0.65;0.03;0.05;0;0.44;1.32	1.11;0.38;0.05;14.71;0.2;0.32;2.41	1.1;0.67;-;9.29;-;-;0.98	NA;0.304925203224179;-;5.41155297134446e-18;-;-;0.00954727571345043
Brain-restricted TAD boundary	12	34520000	34660000	-0.237607	5.41917e-10	-1.96;-1.97;-1.97;-0.55;0.83;-0.7;-0.83	0.19;0.41;0.71;1.29;2.06;1.32;2.23	2.23;2.44;2.74;2.75;2.9;2.63;3.41	ENSSSCG00000017636;ENSSSCG00000017637;ENSSSCG00000017638;ENSSSCG00000034752	LPO;MPO;TSPOAP1;SUPT4H1	0.16;0.17;0.67;18.15	0.4;0.06;40.19;16.68	-;-;6.02;0.01	-;-;1.83109759935226e-69;0.943180622388178
Brain-restricted TAD boundary	12	58080000	58260000	-0.206167	4.90084e-06	-2.52;-2.62;-2.54;-3.93;-3.75;-4.99;-5;-4.79;-3.49	-2.93;-1.09;-1.2;-2.45;-3.9;-3.59;-3.34;-3.37;-3.5	0.4;0.46;0.66;0.51;0.14;0.6;0.33;0.58;0	ENSSSCG00000039318	HS3ST3B1	0.99	0.38	0.74	4.33545e-06
Brain-restricted TAD boundary	13	18380000	18560000	-0.255484	3.22248e-07	3.15;2.97;2.95;3.09;3.58;3.4;3.52;3.89;3.54	1.52;1.38;1.34;1.21;1.99;1.83;1.7;2.36;1.96	1.63;1.59;1.61;1.88;1.58;1.56;1.81;1.53;1.58	ENSSSCG00000011233;ENSSSCG00000038362	DYNC1LI1;CMTM6	63.35;120.01	60.43;67.23	0.02;0.74	0.866911543719686;0.000668589054909689
Brain-restricted TAD boundary	13	106640000	106780000	-0.290701	3.24338e-10	0.85;0.77;0.53;0.31;0.41;0.69;0.66	-0.08;-1.87;-0.09;-1.98;-1.96;-1.88;-0.27	1.07;1.36;1.37;1.71;2.45;2.81;1.06	ENSSSCG00000040950	Unknown	0.76	0.83	0.26	0.613222
Brain-restricted TAD boundary	13	108700000	108880000	-0.267215	5.32435e-11	1.29;1.13;1.16;1.43;2.43;2.56;2.78;2.89;1.95	0.42;0.6;0.24;0.03;1.05;1.11;1.14;1.41;0.87	1.71;1.73;1.41;1.47;1.38;1.45;1.63;1.48;1.08	ENSSSCG00000035883;ENSSSCG00000051128	GPR160;Unknown	1.62;1.13	0.51;1.41	0.47;0.42	0.000963130776493841;0.166889319664147
Brain-restricted TAD boundary	13	108700000	108880000	-0.337703	3.41677e-12	1.29;1.13;1.16;1.43;2.43;2.56;2.78;2.89;1.95	0.42;0.6;0.24;0.03;1.05;1.11;1.14;1.41;0.87	1.71;1.73;1.41;1.47;1.38;1.45;1.63;1.48;1.08	ENSSSCG00000035883;ENSSSCG00000051128	GPR160;Unknown	1.62;1.13	0.51;1.41	0.47;0.42	0.000963130776493841;0.166889319664147
Brain-restricted TAD boundary	13	121500000	121640000	-0.257534	3.88414e-07	5.66;6.33;6.35;5.99;5.58;5.28;5.66	3.74;4.21;5.09;4.64;4.54;3.6;4.69	1.91;2.12;1.25;1.35;1.04;1.68;0.97	ENSSSCG00000011775;ENSSSCG00000011776	KLHL24;YEATS2	327.9;22.52	62.52;29.68	1.69;0.49	5.52708965710396e-06;0.0095383859528961
Brain-restricted TAD boundary	13	153940000	154120000	-0.20065	3.86389e-12	-0.49;-0.51;-0.9;-0.36;-0.41;-1.92;-1.91;-1.81;-0.76	0.08;0.36;0.65;0.62;0.55;-0.58;-0.49;-0.45;0.02	1.6;1.86;1.75;1.01;1.03;0.65;0.57;0.64;1.22	ENSSSCG00000011946;ENSSSCG00000041691	ALCAM;L1TD1	15.97;0.47	91.24;0.58	2.6;0.42	3.25084037507299e-22;0.28960359937971
Brain-restricted TAD boundary	13	161040000	161220000	-0.244148	1.22699e-06	-3.72;-3.83;-3.69;-3.88;-3.88;-3.83;-3.9;-3.78;-3.78	-2.68;-2.66;-2.92;-2.79;-2.79;-2.83;-2.89;-2.93;-2.73	0.95;0.83;1.22;0.9;0.9;1;0.98;1.14;0.95	ENSSSCG00000038996;ENSSSCG00000041140;ENSSSCG00000045161;ENSSSCG00000047390;ENSSSCG00000048471	OR5H8;OR5H8;OR5H8;OR5H8;OR5H8	0;0;0;0.36;0	0;0;0;0.46;0	-;-;-;-;-	-;-;-;-;-
Brain-restricted TAD boundary	13	191440000	191620000	-0.227292	2.8129e-09	0.89;0.85;0.22;0.23;0.14;0.07;0.22;0.2;0.54	-0.33;-0.55;-0.48;-0.23;-1.98;-1.86;-1.82;-0.11;-0.89	0.77;0.59;1.29;1.53;1.88;2.07;1.95;1.68;0.56	-	-	-	-	-	-
Brain-restricted TAD boundary	14	42640000	42820000	-0.32036	1.48045e-08	-0.31;-0.23;-0.13;-0.33;-0.2;-0.17;-0.27;-0.32;-0.24	1.35;1.44;1.37;1.35;1.43;1.47;1.25;1.25;1.34	3.04;3.22;3.25;3.02;3.24;3.3;2.99;2.94;3.1	ENSSSCG00000009951	SGSM1	1.13	60.24	5.83	1.29542e-63
Brain-restricted TAD boundary	14	43140000	43280000	-0.32036	1.48045e-08	2.94;2.75;2.48;2.46;2.61;2.59;2.83	2.87;2.63;2.43;2.3;1.93;1.85;2.1	0.06;0.12;0.05;0.15;0.68;0.73;0.72	ENSSSCG00000009954;ENSSSCG00000009955;ENSSSCG00000009956	CRYBB3;CRYBB2;GRK3	0.65;0.73;43.74	1.68;0.19;110.67	1.88;1.73;1.44	0.0455134628204428;NA;5.43294930995586e-19
Brain-restricted TAD boundary	14	61980000	62160000	-0.265103	1.55967e-10	0.23;0.26;0.29;0.21;0.69;0.87;-0.47;0.21;-0.62	-1.4;-1.78;-1.98;-0.02;-1.86;-1.48;-1.23;-1.18;-1.26	2.37;2.49;2.31;1.77;1.45;1.64;1.23;2.61;1.35	-	-	-	-	-	-
Brain-restricted TAD boundary	14	74860000	75020000	-0.212641	9.83846e-09	5.07;4.69;4.4;4.01;4.38;4.26;4.11;4.37	3.98;4.02;3.54;3.32;3.64;3.53;3.14;3.61	1.09;0.67;0.86;0.69;0.74;0.73;0.96;0.76	ENSSSCG00000010281;ENSSSCG00000010283	PSAP;SPOCK2	353.56;14.08	733.85;197.98	1.15;3.93	3.72749323216226e-06;2.38329231804047e-22
Brain-restricted TAD boundary	14	83200000	83380000	-0.214316	1.61424e-07	-5.83;-5.84;-5.98;-5.95;-5.84;-5.86;-5.63;-5.89;-5.68	-2.85;-2.77;-2.93;-1.29;-1.65;-1.76;-1.5;-2.68;-1.22	3.01;2.92;2.95;3.33;3.8;3.89;3.86;2.79;3.53	ENSSSCG00000010344;ENSSSCG00000049810	NRG3;Unknown	1.43;0	59;26.26	5.5;6.52	3.3223755566614e-33;3.00201488137237e-07
Brain-restricted TAD boundary	14	86420000	86600000	-0.235056	2.94445e-07	-5.95;-5.87;-4.05;-5.97;-4.3;-4.13;-4.13;-4.2;-4.59	-2.73;-2.83;-2.81;-2.91;-1.19;-1.18;-1.21;-1.3;-1.06	2.78;2.96;2.75;2.93;2.88;3.05;3.08;3.1;2.47	ENSSSCG00000050761	Unknown	0.56	0.92	0.88	0.157874
Brain-restricted TAD boundary	14	108360000	108580000	-0.233808	5.61058e-09	0.97;0.97;0.77;1.11;1.37;0.7;0.34;0.21;0.23;0.93;0.09	0.9;0.85;0.7;0.74;0.93;0.85;0.88;0.93;1.12;0.84;0.96	0.06;0.12;0.07;0.37;0.44;0.15;0.54;1.15;1.35;0.09;1.06	-	-	-	-	-	-
Brain-restricted TAD boundary	14	115480000	115620000	-0.206464	1.90409e-11	-4.94;-4.81;-4.84;-4.69;-4.52;-4.62;-4.45	-2.41;-2.52;-2.65;-2.73;-2.82;-1.22;-1.17	1.46;1.7;1.8;2.03;2.29;2.59;2.72	ENSSSCG00000010617	SORCS3	0.14	26.94	7.85	2.9622e-70
Brain-restricted TAD boundary	14	139900000	140040000	-0.253345	9.97059e-10	-0.71;-0.74;-0.47;-0.58;-0.86;-0.82;-0.72	0.52;0.23;0.34;0.33;0.67;0.6;0.74	1.81;1.5;1.87;1.75;1.82;1.78;2.03	ENSSSCG00000037698	TCERG1L	0	3.76	9.47	1.84692e-18
Brain-restricted TAD boundary	15	9160000	9340000	-0.232173	1.21504e-06	-2.72;-2.87;-2.99;-1.41;-1.06;-1.26;-1.04;-2.79;-1.07	-0.25;-0.27;-0.18;-0.26;-0.19;-0.1;-0.21;-0.33;-0.02	1.52;1.39;1.18;0.85;1.13;0.83;1.17;1.54;0.95	ENSSSCG00000047684	Unknown	0.48	1.14	1.4	0.00290411
Brain-restricted TAD boundary	15	131500000	131660000	-0.207984	0.000123653	4.63;4.49;4.55;3.39;2.56;2.08;1.57;2.93	2.9;2.99;2.74;2.7;3.02;2.85;2.41;2.74	1.72;1.5;1.8;0.69;0.46;0.77;0.84;0.18	ENSSSCG00000016267	ITM2C	40.27	429.32	3.51	5.19695e-25
Brain-restricted TAD boundary	15	131500000	131660000	-0.242155	1.17291e-08	4.63;4.49;4.55;3.39;2.56;2.08;1.57;2.93	2.9;2.99;2.74;2.7;3.02;2.85;2.41;2.74	1.72;1.5;1.8;0.69;0.46;0.77;0.84;0.18	ENSSSCG00000016267	ITM2C	40.27	429.32	3.51	5.19695e-25
Brain-restricted TAD boundary	16	42680000	42820000	-0.206034	4.64853e-11	-1.87;-1.75;-1.33;-1.24;-1.05;-2.83;-1.59	-0.64;-0.52;0.7;-0.93;-0.38;-0.36;-0.64	0.76;0.77;1.96;1.68;1.33;1.52;1.05	ENSSSCG00000016941	RNF180	13.26	22.73	0.86	0.0036293
Brain-restricted TAD boundary	16	66480000	66660000	-0.366735	4.06184e-08	1.35;1.34;1.45;1.73;1.95;2.18;2.18;2.48;2.17	0.11;0;0.31;0.58;0.96;-0.96;-0.91;0.83;0.93	1.23;1.34;1.76;2.32;2.92;3.22;3.27;3.31;3.1	-	-	-	-	-	-
Brain-restricted TAD boundary	16	71940000	72080000	-0.234226	6.10217e-06	4.31;4.57;4;4.39;4.39;4.47;4.82	2.43;2.69;2.23;2.91;2.94;3.16;3.07	1.87;1.88;1.76;1.48;1.45;1.3;1.74	ENSSSCG00000036438;ENSSSCG00000048920	GPX3;Unknown	81.54;0.62	5.78;0.42	2.3;0	6.30531147694908e-22;1
Brain-restricted TAD boundary	17	35380000	35520000	-0.311093	2.00972e-08	4.1;4.16;4.12;4.08;4.36;4.05;4.14	3.52;3.58;3.47;3.23;3.14;3.06;3.38	0.58;0.57;0.64;0.85;1.22;0.98;0.75	ENSSSCG00000007231;ENSSSCG00000007235;ENSSSCG00000035357	MYLK2;TPX2;BCL2L1	556.35;22.13;41.07	2.18;12.65;61.6	6.12;0.74;0.68	6.7575332493188e-80;0.187319398293574;4.24148818538688e-05
Brain-restricted TAD boundary	17	45340000	45520000	-0.271803	1.24409e-08	-5.58;-5.41;-5.46;-5.7;-5.69;-5.85;-5.67;-5.56;-5.58	-1.66;-1.8;-1.98;-1.88;-1.91;-1.74;-1.85;-1.49;-1.93	4.08;4.39;4.51;4.18;4.22;3.88;4.17;3.93;4.35	-	-	-	-	-	-

## Sheet: ReadMe
Supplementary Table 4. Characteristics of shifted TAD boundaries between tissues.
Sheet 1: Detailed information of shifted TAD boundaries between liver and skeletal muscle, including allelic differences in LBS, A-B index, and gene expression.
Sheet 2: Detailed information of shifted TAD boundaries between liver and brain, including allelic differences in LBS, A-B index, and gene expression.
Sheet 3: Detailed information of shifted TAD boundaries between skeletal muscle and brain, including allelic differences in LBS, A-B index, and gene expression.
