# Supplementary material for: Haplotype-resolved 3D chromatin architecture of the hybrid pig
Source: HighWire-hosted journal article supplement (doi:10.1101/gr.278101.123), 2024-02-01
Supplement: Supplemental_Table_S5.xlsx [file Supplemental_Table_S5.xlsx]

## Sheet: Sheet 1 (liver)
Shifted TAD boundary between parent-of-origin	Chromosome	Start	End	ΔLBS (maternal – paternal)	P-value of LBS	Imprinted genes located on/nearby the shifted boundary
						Gene Ensembl ID	Gene symbol	Maternal TPM	Paternal TPM
Paternal-specific TAD boundary	9	74420000	74660000	-0.261148	6.8092e-09	ENSSSCG00000015327;ENSSSCG00000015328;ENSSSCG00000036049;ENSSSCG00000015329;ENSSSCG00000015332;ENSSSCG00000029515	CASD1; SGCE; PEG10; PPP1R9A; PON1; PON3	31.48; -; 0.85; 12.74; 463.09; 148.87	26.89; -; 336.57; 9.72; 277.07; 149.59

## Sheet: Sheet 2 (muscle)
Shifted TAD boundary between parent-of-origin	Chromosome	Start	End	ΔLBS (maternal – paternal)	P-value of LBS	Imprinted genes located on/nearby the shifted boundary
						Gene Ensembl ID	Gene symbol	Maternal TPM	Paternal TPM
Paternal-specific TAD boundary	1	142420000	142660000	-0.39	0.000637854	ENSSSCG00000004834;ENSSSCG00000004835;ENSSSCG00000004836	NDN; MAGEL2; MKRN3	0.18; 0; 0.1	78.09; 4.73; 2.42
Maternal-specific TAD boundary	2	1320000	1460000	0.457356	0.000131608	ENSSSCG00000050649; ENSSSCG00000035293; ENSSSCG00000033740; ENSSSCG00000039767; ENSSSCG00000033507; ENSSSCG00000039243	H19; IGF2; INS; TH; ASCL2; CD81	3920.41; 34.58; 0; 0; 0.07; 169.37	0; 410.97; 0; 0; 0.07; 155.99

## Sheet: Sheet 3 (brain)
Shifted TAD boundary between parent-of-origin	Chromosome	Start	End	ΔLBS (maternal – paternal)	P-value of LBS	Imprinted genes located on/nearby the shifted boundary
						Gene Ensembl ID	Gene symbol	Maternal TPM	Paternal TPM
Paternal-specific TAD boundary	1	142400000	142680000	-0.27	7.55183e-07	ENSSSCG00000004834;ENSSSCG00000004835;ENSSSCG00000004836	NDN; MAGEL2; MKRN3	0.44; 0.08; 0.21	91.69; 16.26; 7.47
Paternal-specific TAD boundary	9	74440000	74600000	-0.28	1.2594e-05	ENSSSCG00000015327;ENSSSCG00000015328;ENSSSCG00000036049;	CASD1; SGCE; PEG10	31.66; -; 0.1	30.52; -; 180.19

## Sheet: ReadMe
Supplementary Table 5. Shifted TAD boundaries between parent-of-origin in the three tissues.
Sheet 1: Detailed information of one paternal-specific TAD boundary identified in the liver tissue, including the allelic differences in LBS, A-B index, and gene expression.
Sheet 2: Detailed information of one maternal-specific and one paternal-specific TAD boundaries identified in the skeletal muscle tissue, including the allelic differences in LBS, A-B index, and gene expression.
Sheet 3: Detailed information of two paternal-specific TAD boundaries identified in the brain tissue, including the allelic differences in LBS, A-B index, and gene expression.
