# Supplementary material for: Haplotype-resolved 3D chromatin architecture of the hybrid pig
Source: HighWire-hosted journal article supplement (doi:10.1101/gr.278101.123), 2024-02-01
Supplement: Supplemental_Table_S6.xlsx [file Supplemental_Table_S6.xlsx]

## Sheet: Sheet 1 (Liver)
Regions with differential LBS between breeds	Chromosome	Region start	Region end	P-value of LBS	ΔLBS (Berkshire – Tibetan)	Bin start	Bin end	Identity score
Higher LBS in Berkshire	1	3780000	3880000	7.36117e-07	0.0765211	3780000	3800000	0.987905
Higher LBS in Berkshire	1	3780000	3880000	7.36117e-07	0.0765211	3820000	3840000	0.990421
Higher LBS in Berkshire	1	3780000	3880000	7.36117e-07	0.0765211	3840000	3860000	0.995223
Higher LBS in Berkshire	1	3780000	3880000	7.36117e-07	0.0765211	3860000	3880000	0.996286
Higher LBS in Berkshire	1	3780000	3880000	7.36117e-07	0.0765211	3800000	3820000	0.991635
Higher LBS in Berkshire	1	12920000	13000000	1.68496e-05	0.0860171	12920000	12940000	0.987959
Higher LBS in Berkshire	1	12920000	13000000	1.68496e-05	0.0860171	12940000	12960000	0.985872
Higher LBS in Berkshire	1	12920000	13000000	1.68496e-05	0.0860171	12980000	13000000	0.982469
Higher LBS in Berkshire	1	12920000	13000000	1.68496e-05	0.0860171	12960000	12980000	0.985957
Higher LBS in Berkshire	1	19860000	19940000	3.6223e-05	0.0677683	19860000	19880000	0.990728
Higher LBS in Berkshire	1	19860000	19940000	3.6223e-05	0.0677683	19880000	19900000	0.988951
Higher LBS in Berkshire	1	19860000	19940000	3.6223e-05	0.0677683	19900000	19920000	0.987324
Higher LBS in Berkshire	1	19860000	19940000	3.6223e-05	0.0677683	19920000	19940000	0.993458
Higher LBS in Berkshire	1	20760000	20860000	3.65534e-12	0.0455368	20760000	20780000	0.989225
Higher LBS in Berkshire	1	20760000	20860000	3.65534e-12	0.0455368	20780000	20800000	0.98626
Higher LBS in Berkshire	1	20760000	20860000	3.65534e-12	0.0455368	20800000	20820000	0.983514
Higher LBS in Berkshire	1	20760000	20860000	3.65534e-12	0.0455368	20820000	20840000	0.978349
Higher LBS in Berkshire	1	20760000	20860000	3.65534e-12	0.0455368	20840000	20860000	0.985434
Higher LBS in Berkshire	1	23520000	23600000	9.16753e-13	0.0443556	23520000	23540000	0.993328
Higher LBS in Berkshire	1	23520000	23600000	9.16753e-13	0.0443556	23540000	23560000	0.993087
Higher LBS in Berkshire	1	23520000	23600000	9.16753e-13	0.0443556	23560000	23580000	0.992682
Higher LBS in Berkshire	1	23520000	23600000	9.16753e-13	0.0443556	23580000	23600000	0.992403
Higher LBS in Berkshire	1	24100000	24300000	1.75513e-34	0.0660958	24120000	24140000	0.995117
Higher LBS in Berkshire	1	24100000	24300000	1.75513e-34	0.0660958	24140000	24160000	0.996767
Higher LBS in Berkshire	1	24100000	24300000	1.75513e-34	0.0660958	24160000	24180000	0.996431
Higher LBS in Berkshire	1	24100000	24300000	1.75513e-34	0.0660958	24180000	24200000	0.992678
Higher LBS in Berkshire	1	24100000	24300000	1.75513e-34	0.0660958	24200000	24220000	0.990834
Higher LBS in Berkshire	1	24100000	24300000	1.75513e-34	0.0660958	24220000	24240000	0.99382
Higher LBS in Berkshire	1	24100000	24300000	1.75513e-34	0.0660958	24260000	24280000	0.994964
Higher LBS in Berkshire	1	24100000	24300000	1.75513e-34	0.0660958	24280000	24300000	0.992462
Higher LBS in Berkshire	1	24100000	24300000	1.75513e-34	0.0660958	24240000	24260000	0.993863
Higher LBS in Berkshire	1	24100000	24300000	1.75513e-34	0.0660958	24100000	24120000	0.995627
Higher LBS in Berkshire	1	25440000	25520000	6.57392e-14	0.0381493	25440000	25460000	0.987027
Higher LBS in Berkshire	1	25440000	25520000	6.57392e-14	0.0381493	25460000	25480000	0.989989
Higher LBS in Berkshire	1	25440000	25520000	6.57392e-14	0.0381493	25480000	25500000	0.993058
Higher LBS in Berkshire	1	25440000	25520000	6.57392e-14	0.0381493	25500000	25520000	0.995516
Higher LBS in Berkshire	1	26940000	27060000	1.1944e-08	0.0649905	26940000	26960000	0.992241
Higher LBS in Berkshire	1	26940000	27060000	1.1944e-08	0.0649905	26960000	26980000	0.985481
Higher LBS in Berkshire	1	26940000	27060000	1.1944e-08	0.0649905	26980000	27000000	0.987557
Higher LBS in Berkshire	1	26940000	27060000	1.1944e-08	0.0649905	27020000	27040000	0.992029
Higher LBS in Berkshire	1	26940000	27060000	1.1944e-08	0.0649905	27040000	27060000	0.991672
Higher LBS in Berkshire	1	26940000	27060000	1.1944e-08	0.0649905	27000000	27020000	0.985921
Higher LBS in Berkshire	1	29980000	30040000	2.93866e-06	0.048801	29980000	30000000	0.984414
Higher LBS in Berkshire	1	29980000	30040000	2.93866e-06	0.048801	30020000	30040000	0.989788
Higher LBS in Berkshire	1	29980000	30040000	2.93866e-06	0.048801	30000000	30020000	0.991456
Higher LBS in Berkshire	1	35280000	35340000	0.000191869	0.056202	35280000	35300000	0.993096
Higher LBS in Berkshire	1	35280000	35340000	0.000191869	0.056202	35300000	35320000	0.99167
Higher LBS in Berkshire	1	35280000	35340000	0.000191869	0.056202	35320000	35340000	0.989945
Higher LBS in Berkshire	1	41260000	41320000	1.09295e-08	0.0519263	41260000	41280000	0.991705
Higher LBS in Berkshire	1	41260000	41320000	1.09295e-08	0.0519263	41300000	41320000	0.986088
Higher LBS in Berkshire	1	41260000	41320000	1.09295e-08	0.0519263	41280000	41300000	0.992489
Higher LBS in Berkshire	1	43980000	44080000	9.55816e-08	0.0854137	43980000	44000000	0.995354
Higher LBS in Berkshire	1	43980000	44080000	9.55816e-08	0.0854137	44000000	44020000	0.997124
Higher LBS in Berkshire	1	43980000	44080000	9.55816e-08	0.0854137	44020000	44040000	0.997382
Higher LBS in Berkshire	1	43980000	44080000	9.55816e-08	0.0854137	44060000	44080000	0.993389
Higher LBS in Berkshire	1	43980000	44080000	9.55816e-08	0.0854137	44040000	44060000	0.998246
Higher LBS in Berkshire	1	45620000	45760000	0.00028586	0.0813906	45620000	45640000	0.992721
Higher LBS in Berkshire	1	45620000	45760000	0.00028586	0.0813906	45640000	45660000	0.989503
Higher LBS in Berkshire	1	45620000	45760000	0.00028586	0.0813906	45660000	45680000	0.99302
Higher LBS in Berkshire	1	45620000	45760000	0.00028586	0.0813906	45680000	45700000	0.993126
Higher LBS in Berkshire	1	45620000	45760000	0.00028586	0.0813906	45700000	45720000	0.988359
Higher LBS in Berkshire	1	45620000	45760000	0.00028586	0.0813906	45720000	45740000	0.98992
Higher LBS in Berkshire	1	45620000	45760000	0.00028586	0.0813906	45740000	45760000	0.99373
Higher LBS in Berkshire	1	47220000	47280000	5.07556e-10	0.0430811	47220000	47240000	0.993252
Higher LBS in Berkshire	1	47220000	47280000	5.07556e-10	0.0430811	47240000	47260000	0.993108
Higher LBS in Berkshire	1	47220000	47280000	5.07556e-10	0.0430811	47260000	47280000	0.989142
Higher LBS in Berkshire	1	54620000	54740000	2.01244e-10	0.0776907	54620000	54640000	0.995616
Higher LBS in Berkshire	1	54620000	54740000	2.01244e-10	0.0776907	54660000	54680000	0.986754
Higher LBS in Berkshire	1	54620000	54740000	2.01244e-10	0.0776907	54680000	54700000	0.996974
Higher LBS in Berkshire	1	54620000	54740000	2.01244e-10	0.0776907	54700000	54720000	0.997991
Higher LBS in Berkshire	1	54620000	54740000	2.01244e-10	0.0776907	54720000	54740000	0.996426
Higher LBS in Berkshire	1	54620000	54740000	2.01244e-10	0.0776907	54640000	54660000	0.995307
Higher LBS in Berkshire	1	55240000	55420000	0.0169383	0.137119	55240000	55260000	0.99396
Higher LBS in Berkshire	1	55240000	55420000	0.0169383	0.137119	55260000	55280000	0.996897
Higher LBS in Berkshire	1	55240000	55420000	0.0169383	0.137119	55280000	55300000	0.995171
Higher LBS in Berkshire	1	55240000	55420000	0.0169383	0.137119	55320000	55340000	0.987796
Higher LBS in Berkshire	1	55240000	55420000	0.0169383	0.137119	55340000	55360000	0.989884
Higher LBS in Berkshire	1	55240000	55420000	0.0169383	0.137119	55360000	55380000	0.99111
Higher LBS in Berkshire	1	55240000	55420000	0.0169383	0.137119	55380000	55400000	0.987042
Higher LBS in Berkshire	1	55240000	55420000	0.0169383	0.137119	55400000	55420000	0.994846
Higher LBS in Berkshire	1	55240000	55420000	0.0169383	0.137119	55300000	55320000	0.993659
Higher LBS in Berkshire	1	56220000	56320000	0.0103266	0.0816602	56240000	56260000	0.989893
Higher LBS in Berkshire	1	56220000	56320000	0.0103266	0.0816602	56260000	56280000	0.987531
Higher LBS in Berkshire	1	56220000	56320000	0.0103266	0.0816602	56280000	56300000	0.992395
Higher LBS in Berkshire	1	56220000	56320000	0.0103266	0.0816602	56300000	56320000	0.997316
Higher LBS in Berkshire	1	56220000	56320000	0.0103266	0.0816602	56220000	56240000	0.98932
Higher LBS in Berkshire	1	57200000	57280000	2.67768e-23	0.0327815	57200000	57220000	0.996497
Higher LBS in Berkshire	1	57200000	57280000	2.67768e-23	0.0327815	57220000	57240000	0.99268
Higher LBS in Berkshire	1	57200000	57280000	2.67768e-23	0.0327815	57240000	57260000	0.992609
Higher LBS in Berkshire	1	57200000	57280000	2.67768e-23	0.0327815	57260000	57280000	0.991953
Higher LBS in Berkshire	1	57480000	57560000	2.88337e-10	0.0533256	57480000	57500000	0.993761
Higher LBS in Berkshire	1	57480000	57560000	2.88337e-10	0.0533256	57500000	57520000	0.992693
Higher LBS in Berkshire	1	57480000	57560000	2.88337e-10	0.0533256	57520000	57540000	0.993066
Higher LBS in Berkshire	1	57480000	57560000	2.88337e-10	0.0533256	57540000	57560000	0.992283
Higher LBS in Berkshire	1	59440000	59580000	3.31398e-06	0.0928917	59440000	59460000	0.993173
Higher LBS in Berkshire	1	59440000	59580000	3.31398e-06	0.0928917	59460000	59480000	0.991029
Higher LBS in Berkshire	1	59440000	59580000	3.31398e-06	0.0928917	59480000	59500000	0.99386
Higher LBS in Berkshire	1	59440000	59580000	3.31398e-06	0.0928917	59520000	59540000	0.994271
Higher LBS in Berkshire	1	59440000	59580000	3.31398e-06	0.0928917	59540000	59560000	0.992765
Higher LBS in Berkshire	1	59440000	59580000	3.31398e-06	0.0928917	59560000	59580000	0.993252
Higher LBS in Berkshire	1	59440000	59580000	3.31398e-06	0.0928917	59500000	59520000	0.994092
Higher LBS in Berkshire	1	61700000	62060000	0.000143862	0.154662	61700000	61720000	0.994846
Higher LBS in Berkshire	1	61700000	62060000	0.000143862	0.154662	61740000	61760000	0.997816
Higher LBS in Berkshire	1	61700000	62060000	0.000143862	0.154662	61760000	61780000	0.997702
Higher LBS in Berkshire	1	61700000	62060000	0.000143862	0.154662	61780000	61800000	0.99631
Higher LBS in Berkshire	1	61700000	62060000	0.000143862	0.154662	61800000	61820000	0.994332
Higher LBS in Berkshire	1	61700000	62060000	0.000143862	0.154662	61820000	61840000	0.995492
Higher LBS in Berkshire	1	61700000	62060000	0.000143862	0.154662	61840000	61860000	0.986065
Higher LBS in Berkshire	1	61700000	62060000	0.000143862	0.154662	61880000	61900000	0.992318
Higher LBS in Berkshire	1	61700000	62060000	0.000143862	0.154662	61900000	61920000	0.996227
Higher LBS in Berkshire	1	61700000	62060000	0.000143862	0.154662	61920000	61940000	0.99393
Higher LBS in Berkshire	1	61700000	62060000	0.000143862	0.154662	61940000	61960000	0.993621
Higher LBS in Berkshire	1	61700000	62060000	0.000143862	0.154662	61960000	61980000	0.994247
Higher LBS in Berkshire	1	61700000	62060000	0.000143862	0.154662	62000000	62020000	0.997176
Higher LBS in Berkshire	1	61700000	62060000	0.000143862	0.154662	62020000	62040000	0.998459
Higher LBS in Berkshire	1	61700000	62060000	0.000143862	0.154662	62040000	62060000	0.997342
Higher LBS in Berkshire	1	61700000	62060000	0.000143862	0.154662	61720000	61740000	0.99695
Higher LBS in Berkshire	1	61700000	62060000	0.000143862	0.154662	61980000	62000000	0.996221
Higher LBS in Berkshire	1	61700000	62060000	0.000143862	0.154662	61860000	61880000	0.993891
Higher LBS in Berkshire	1	64200000	64260000	1.05937e-16	0.0469993	64200000	64220000	0.991576
Higher LBS in Berkshire	1	64200000	64260000	1.05937e-16	0.0469993	64240000	64260000	0.995996
Higher LBS in Berkshire	1	64200000	64260000	1.05937e-16	0.0469993	64220000	64240000	0.998209
Higher LBS in Berkshire	1	72120000	72240000	1.75986e-14	0.0396615	72120000	72140000	0.998454
Higher LBS in Berkshire	1	72120000	72240000	1.75986e-14	0.0396615	72140000	72160000	0.996559
Higher LBS in Berkshire	1	72120000	72240000	1.75986e-14	0.0396615	72160000	72180000	0.994543
Higher LBS in Berkshire	1	72120000	72240000	1.75986e-14	0.0396615	72180000	72200000	0.993836
Higher LBS in Berkshire	1	72120000	72240000	1.75986e-14	0.0396615	72200000	72220000	0.994025
Higher LBS in Berkshire	1	72120000	72240000	1.75986e-14	0.0396615	72220000	72240000	0.992218
Higher LBS in Berkshire	1	76860000	76980000	0.00374156	0.0725686	76860000	76880000	0.995519
Higher LBS in Berkshire	1	76860000	76980000	0.00374156	0.0725686	76880000	76900000	0.989084
Higher LBS in Berkshire	1	76860000	76980000	0.00374156	0.0725686	76900000	76920000	0.995818
Higher LBS in Berkshire	1	76860000	76980000	0.00374156	0.0725686	76940000	76960000	0.994863
Higher LBS in Berkshire	1	76860000	76980000	0.00374156	0.0725686	76960000	76980000	0.995241
Higher LBS in Berkshire	1	76860000	76980000	0.00374156	0.0725686	76920000	76940000	0.994871
Higher LBS in Berkshire	1	77420000	77560000	6.09638e-29	0.0401888	77420000	77440000	0.99568
Higher LBS in Berkshire	1	77420000	77560000	6.09638e-29	0.0401888	77440000	77460000	0.994535
Higher LBS in Berkshire	1	77420000	77560000	6.09638e-29	0.0401888	77480000	77500000	0.993543
Higher LBS in Berkshire	1	77420000	77560000	6.09638e-29	0.0401888	77500000	77520000	0.996369
Higher LBS in Berkshire	1	77420000	77560000	6.09638e-29	0.0401888	77520000	77540000	0.996
Higher LBS in Berkshire	1	77420000	77560000	6.09638e-29	0.0401888	77540000	77560000	0.995697
Higher LBS in Berkshire	1	77420000	77560000	6.09638e-29	0.0401888	77460000	77480000	0.990491
Higher LBS in Berkshire	1	78040000	78100000	2.13143e-08	0.0682882	78040000	78060000	0.997432
Higher LBS in Berkshire	1	78040000	78100000	2.13143e-08	0.0682882	78060000	78080000	0.994695
Higher LBS in Berkshire	1	78040000	78100000	2.13143e-08	0.0682882	78080000	78100000	0.995159
Higher LBS in Berkshire	1	79760000	79820000	0.000303712	0.0424913	79760000	79780000	0.992956
Higher LBS in Berkshire	1	79760000	79820000	0.000303712	0.0424913	79780000	79800000	0.994561
Higher LBS in Berkshire	1	79760000	79820000	0.000303712	0.0424913	79800000	79820000	0.995433
Higher LBS in Berkshire	1	80940000	81100000	0.00121418	0.0859479	80940000	80960000	0.995952
Higher LBS in Berkshire	1	80940000	81100000	0.00121418	0.0859479	80960000	80980000	0.99557
Higher LBS in Berkshire	1	80940000	81100000	0.00121418	0.0859479	80980000	81000000	0.994449
Higher LBS in Berkshire	1	80940000	81100000	0.00121418	0.0859479	81020000	81040000	0.994633
Higher LBS in Berkshire	1	80940000	81100000	0.00121418	0.0859479	81040000	81060000	0.994767
Higher LBS in Berkshire	1	80940000	81100000	0.00121418	0.0859479	81060000	81080000	0.997283
Higher LBS in Berkshire	1	80940000	81100000	0.00121418	0.0859479	81080000	81100000	0.997373
Higher LBS in Berkshire	1	80940000	81100000	0.00121418	0.0859479	81000000	81020000	0.993548
Higher LBS in Berkshire	1	81880000	82140000	8.41191e-10	0.100168	81880000	81900000	0.993827
Higher LBS in Berkshire	1	81880000	82140000	8.41191e-10	0.100168	81900000	81920000	0.992635
Higher LBS in Berkshire	1	81880000	82140000	8.41191e-10	0.100168	81920000	81940000	0.985
Higher LBS in Berkshire	1	81880000	82140000	8.41191e-10	0.100168	81940000	81960000	0.99391
Higher LBS in Berkshire	1	81880000	82140000	8.41191e-10	0.100168	81960000	81980000	0.994581
Higher LBS in Berkshire	1	81880000	82140000	8.41191e-10	0.100168	81980000	82000000	0.991899
Higher LBS in Berkshire	1	81880000	82140000	8.41191e-10	0.100168	82000000	82020000	0.995575
Higher LBS in Berkshire	1	81880000	82140000	8.41191e-10	0.100168	82020000	82040000	0.99689
Higher LBS in Berkshire	1	81880000	82140000	8.41191e-10	0.100168	82060000	82080000	0.996492
Higher LBS in Berkshire	1	81880000	82140000	8.41191e-10	0.100168	82080000	82100000	0.997203
Higher LBS in Berkshire	1	81880000	82140000	8.41191e-10	0.100168	82100000	82120000	0.997505
Higher LBS in Berkshire	1	81880000	82140000	8.41191e-10	0.100168	82120000	82140000	0.993918
Higher LBS in Berkshire	1	81880000	82140000	8.41191e-10	0.100168	82040000	82060000	0.996846
Higher LBS in Berkshire	1	85280000	85340000	9.21358e-10	0.0635009	85280000	85300000	0.997968
Higher LBS in Berkshire	1	85280000	85340000	9.21358e-10	0.0635009	85300000	85320000	0.997887
Higher LBS in Berkshire	1	85280000	85340000	9.21358e-10	0.0635009	85320000	85340000	0.995079
Higher LBS in Berkshire	1	86120000	86400000	7.67635e-08	0.0851194	86120000	86140000	0.991771
Higher LBS in Berkshire	1	86120000	86400000	7.67635e-08	0.0851194	86140000	86160000	0.991616
Higher LBS in Berkshire	1	86120000	86400000	7.67635e-08	0.0851194	86160000	86180000	0.993541
Higher LBS in Berkshire	1	86120000	86400000	7.67635e-08	0.0851194	86180000	86200000	0.992956
Higher LBS in Berkshire	1	86120000	86400000	7.67635e-08	0.0851194	86200000	86220000	0.992452
Higher LBS in Berkshire	1	86120000	86400000	7.67635e-08	0.0851194	86220000	86240000	0.992893
Higher LBS in Berkshire	1	86120000	86400000	7.67635e-08	0.0851194	86260000	86280000	0.991122
Higher LBS in Berkshire	1	86120000	86400000	7.67635e-08	0.0851194	86280000	86300000	0.987292
Higher LBS in Berkshire	1	86120000	86400000	7.67635e-08	0.0851194	86300000	86320000	0.98891
Higher LBS in Berkshire	1	86120000	86400000	7.67635e-08	0.0851194	86320000	86340000	0.996263
Higher LBS in Berkshire	1	86120000	86400000	7.67635e-08	0.0851194	86340000	86360000	0.99314
Higher LBS in Berkshire	1	86120000	86400000	7.67635e-08	0.0851194	86380000	86400000	0.994565
Higher LBS in Berkshire	1	86120000	86400000	7.67635e-08	0.0851194	86240000	86260000	0.994858
Higher LBS in Berkshire	1	86120000	86400000	7.67635e-08	0.0851194	86360000	86380000	0.992854
Higher LBS in Berkshire	1	94820000	94900000	0.000288676	0.0808329	94820000	94840000	0.992225
Higher LBS in Berkshire	1	94820000	94900000	0.000288676	0.0808329	94840000	94860000	0.996509
Higher LBS in Berkshire	1	94820000	94900000	0.000288676	0.0808329	94860000	94880000	0.996109
Higher LBS in Berkshire	1	94820000	94900000	0.000288676	0.0808329	94880000	94900000	0.996021
Higher LBS in Berkshire	1	96340000	96440000	3.61413e-14	0.0490662	96340000	96360000	0.98894
Higher LBS in Berkshire	1	96340000	96440000	3.61413e-14	0.0490662	96360000	96380000	0.994686
Higher LBS in Berkshire	1	96340000	96440000	3.61413e-14	0.0490662	96380000	96400000	0.991117
Higher LBS in Berkshire	1	96340000	96440000	3.61413e-14	0.0490662	96400000	96420000	0.989767
Higher LBS in Berkshire	1	96340000	96440000	3.61413e-14	0.0490662	96420000	96440000	0.989927
Higher LBS in Berkshire	1	100520000	100720000	0.000118871	0.0776973	100540000	100560000	0.987512
Higher LBS in Berkshire	1	100520000	100720000	0.000118871	0.0776973	100560000	100580000	0.996696
Higher LBS in Berkshire	1	100520000	100720000	0.000118871	0.0776973	100580000	100600000	0.998076
Higher LBS in Berkshire	1	100520000	100720000	0.000118871	0.0776973	100600000	100620000	0.996278
Higher LBS in Berkshire	1	100520000	100720000	0.000118871	0.0776973	100620000	100640000	0.995971
Higher LBS in Berkshire	1	100520000	100720000	0.000118871	0.0776973	100640000	100660000	0.996756
Higher LBS in Berkshire	1	100520000	100720000	0.000118871	0.0776973	100680000	100700000	0.99772
Higher LBS in Berkshire	1	100520000	100720000	0.000118871	0.0776973	100700000	100720000	0.993597
Higher LBS in Berkshire	1	100520000	100720000	0.000118871	0.0776973	100520000	100540000	0.997046
Higher LBS in Berkshire	1	100520000	100720000	0.000118871	0.0776973	100660000	100680000	0.997217
Higher LBS in Berkshire	1	101360000	101460000	0.000732782	0.0590272	101360000	101380000	0.992947
Higher LBS in Berkshire	1	101360000	101460000	0.000732782	0.0590272	101380000	101400000	0.995571
Higher LBS in Berkshire	1	101360000	101460000	0.000732782	0.0590272	101400000	101420000	0.996355
Higher LBS in Berkshire	1	101360000	101460000	0.000732782	0.0590272	101420000	101440000	0.994185
Higher LBS in Berkshire	1	101360000	101460000	0.000732782	0.0590272	101440000	101460000	0.994874
Higher LBS in Berkshire	1	102140000	102200000	2.37474e-05	0.117779	102140000	102160000	0.993958
Higher LBS in Berkshire	1	102140000	102200000	2.37474e-05	0.117779	102160000	102180000	0.995202
Higher LBS in Berkshire	1	102140000	102200000	2.37474e-05	0.117779	102180000	102200000	0.995253
Higher LBS in Berkshire	1	104260000	104480000	3.92035e-11	0.051387	104260000	104280000	0.988439
Higher LBS in Berkshire	1	104260000	104480000	3.92035e-11	0.051387	104280000	104300000	0.994125
Higher LBS in Berkshire	1	104260000	104480000	3.92035e-11	0.051387	104300000	104320000	0.994697
Higher LBS in Berkshire	1	104260000	104480000	3.92035e-11	0.051387	104340000	104360000	0.99173
Higher LBS in Berkshire	1	104260000	104480000	3.92035e-11	0.051387	104360000	104380000	0.997659
Higher LBS in Berkshire	1	104260000	104480000	3.92035e-11	0.051387	104380000	104400000	0.994662
Higher LBS in Berkshire	1	104260000	104480000	3.92035e-11	0.051387	104400000	104420000	0.99795
Higher LBS in Berkshire	1	104260000	104480000	3.92035e-11	0.051387	104420000	104440000	0.993716
Higher LBS in Berkshire	1	104260000	104480000	3.92035e-11	0.051387	104440000	104460000	0.993079
Higher LBS in Berkshire	1	104260000	104480000	3.92035e-11	0.051387	104320000	104340000	0.995936
Higher LBS in Berkshire	1	104260000	104480000	3.92035e-11	0.051387	104460000	104480000	0.98814
Higher LBS in Berkshire	1	107080000	107140000	0.000120797	0.0709445	107100000	107120000	0.993485
Higher LBS in Berkshire	1	107080000	107140000	0.000120797	0.0709445	107120000	107140000	0.994236
Higher LBS in Berkshire	1	107080000	107140000	0.000120797	0.0709445	107080000	107100000	0.990509
Higher LBS in Berkshire	1	107720000	107800000	3.62952e-09	0.0412328	107720000	107740000	0.99647
Higher LBS in Berkshire	1	107720000	107800000	3.62952e-09	0.0412328	107760000	107780000	0.995534
Higher LBS in Berkshire	1	107720000	107800000	3.62952e-09	0.0412328	107780000	107800000	0.996161
Higher LBS in Berkshire	1	107720000	107800000	3.62952e-09	0.0412328	107740000	107760000	0.994883
Higher LBS in Berkshire	1	112840000	112920000	1.21264e-09	0.0492172	112860000	112880000	0.99382
Higher LBS in Berkshire	1	112840000	112920000	1.21264e-09	0.0492172	112880000	112900000	0.996635
Higher LBS in Berkshire	1	112840000	112920000	1.21264e-09	0.0492172	112900000	112920000	0.994561
Higher LBS in Berkshire	1	112840000	112920000	1.21264e-09	0.0492172	112840000	112860000	0.991255
Higher LBS in Berkshire	1	113700000	114380000	0.000965081	0.0560581	113700000	113720000	0.998792
Higher LBS in Berkshire	1	113700000	114380000	0.000965081	0.0560581	113720000	113740000	0.997996
Higher LBS in Berkshire	1	113700000	114380000	0.000965081	0.0560581	113740000	113760000	0.994911
Higher LBS in Berkshire	1	113700000	114380000	0.000965081	0.0560581	113780000	113800000	0.997555
Higher LBS in Berkshire	1	113700000	114380000	0.000965081	0.0560581	113800000	113820000	0.996871
Higher LBS in Berkshire	1	113700000	114380000	0.000965081	0.0560581	113820000	113840000	0.994173
Higher LBS in Berkshire	1	113700000	114380000	0.000965081	0.0560581	113840000	113860000	0.991357
Higher LBS in Berkshire	1	113700000	114380000	0.000965081	0.0560581	113860000	113880000	0.984768
Higher LBS in Berkshire	1	113700000	114380000	0.000965081	0.0560581	113880000	113900000	0.988751
Higher LBS in Berkshire	1	113700000	114380000	0.000965081	0.0560581	113920000	113940000	0.996026
Higher LBS in Berkshire	1	113700000	114380000	0.000965081	0.0560581	113940000	113960000	0.996847
Higher LBS in Berkshire	1	113700000	114380000	0.000965081	0.0560581	113960000	113980000	0.995546
Higher LBS in Berkshire	1	113700000	114380000	0.000965081	0.0560581	113980000	114000000	0.997127
Higher LBS in Berkshire	1	113700000	114380000	0.000965081	0.0560581	114000000	114020000	0.995335
Higher LBS in Berkshire	1	113700000	114380000	0.000965081	0.0560581	114040000	114060000	0.994193
Higher LBS in Berkshire	1	113700000	114380000	0.000965081	0.0560581	114060000	114080000	0.993815
Higher LBS in Berkshire	1	113700000	114380000	0.000965081	0.0560581	114080000	114100000	0.994134
Higher LBS in Berkshire	1	113700000	114380000	0.000965081	0.0560581	114100000	114120000	0.995612
Higher LBS in Berkshire	1	113700000	114380000	0.000965081	0.0560581	114120000	114140000	0.992547
Higher LBS in Berkshire	1	113700000	114380000	0.000965081	0.0560581	114140000	114160000	0.993379
Higher LBS in Berkshire	1	113700000	114380000	0.000965081	0.0560581	114180000	114200000	0.995292
Higher LBS in Berkshire	1	113700000	114380000	0.000965081	0.0560581	114200000	114220000	0.994365
Higher LBS in Berkshire	1	113700000	114380000	0.000965081	0.0560581	114220000	114240000	0.996952
Higher LBS in Berkshire	1	113700000	114380000	0.000965081	0.0560581	114240000	114260000	0.994933
Higher LBS in Berkshire	1	113700000	114380000	0.000965081	0.0560581	114260000	114280000	0.995486
Higher LBS in Berkshire	1	113700000	114380000	0.000965081	0.0560581	114300000	114320000	0.993651
Higher LBS in Berkshire	1	113700000	114380000	0.000965081	0.0560581	114320000	114340000	0.993951
Higher LBS in Berkshire	1	113700000	114380000	0.000965081	0.0560581	114340000	114360000	0.990677
Higher LBS in Berkshire	1	113700000	114380000	0.000965081	0.0560581	114360000	114380000	0.997334
Higher LBS in Berkshire	1	113700000	114380000	0.000965081	0.0560581	113760000	113780000	0.997176
Higher LBS in Berkshire	1	113700000	114380000	0.000965081	0.0560581	113900000	113920000	0.991115
Higher LBS in Berkshire	1	113700000	114380000	0.000965081	0.0560581	114020000	114040000	0.996227
Higher LBS in Berkshire	1	113700000	114380000	0.000965081	0.0560581	114160000	114180000	0.993337
Higher LBS in Berkshire	1	113700000	114380000	0.000965081	0.0560581	114280000	114300000	0.992429
Higher LBS in Berkshire	1	115940000	116040000	0.0426261	0.040303	115940000	115960000	0.994203
Higher LBS in Berkshire	1	115940000	116040000	0.0426261	0.040303	115960000	115980000	0.997742
Higher LBS in Berkshire	1	115940000	116040000	0.0426261	0.040303	116000000	116020000	0.995752
Higher LBS in Berkshire	1	115940000	116040000	0.0426261	0.040303	116020000	116040000	0.993524
Higher LBS in Berkshire	1	115940000	116040000	0.0426261	0.040303	115980000	116000000	0.995139
Higher LBS in Berkshire	1	117160000	117300000	0.00350409	0.083249	117180000	117200000	0.990178
Higher LBS in Berkshire	1	117160000	117300000	0.00350409	0.083249	117200000	117220000	0.990662
Higher LBS in Berkshire	1	117160000	117300000	0.00350409	0.083249	117220000	117240000	0.992927
Higher LBS in Berkshire	1	117160000	117300000	0.00350409	0.083249	117240000	117260000	0.990361
Higher LBS in Berkshire	1	117160000	117300000	0.00350409	0.083249	117260000	117280000	0.991149
Higher LBS in Berkshire	1	117160000	117300000	0.00350409	0.083249	117280000	117300000	0.995758
Higher LBS in Berkshire	1	117160000	117300000	0.00350409	0.083249	117160000	117180000	0.989486
Higher LBS in Berkshire	1	119360000	119480000	4.72363e-08	0.0498297	119360000	119380000	0.99759
Higher LBS in Berkshire	1	119360000	119480000	4.72363e-08	0.0498297	119380000	119400000	0.998136
Higher LBS in Berkshire	1	119360000	119480000	4.72363e-08	0.0498297	119420000	119440000	0.987223
Higher LBS in Berkshire	1	119360000	119480000	4.72363e-08	0.0498297	119440000	119460000	0.991369
Higher LBS in Berkshire	1	119360000	119480000	4.72363e-08	0.0498297	119460000	119480000	0.995452
Higher LBS in Berkshire	1	119360000	119480000	4.72363e-08	0.0498297	119400000	119420000	0.99602
Higher LBS in Berkshire	1	120020000	120080000	1.66716e-06	0.0384604	120020000	120040000	0.996316
Higher LBS in Berkshire	1	120020000	120080000	1.66716e-06	0.0384604	120040000	120060000	0.996902
Higher LBS in Berkshire	1	120020000	120080000	1.66716e-06	0.0384604	120060000	120080000	0.99749
Higher LBS in Berkshire	1	120580000	120760000	4.14788e-07	0.0901389	120600000	120620000	0.996138
Higher LBS in Berkshire	1	120580000	120760000	4.14788e-07	0.0901389	120620000	120640000	0.994064
Higher LBS in Berkshire	1	120580000	120760000	4.14788e-07	0.0901389	120640000	120660000	0.996351
Higher LBS in Berkshire	1	120580000	120760000	4.14788e-07	0.0901389	120660000	120680000	0.997678
Higher LBS in Berkshire	1	120580000	120760000	4.14788e-07	0.0901389	120680000	120700000	0.996777
Higher LBS in Berkshire	1	120580000	120760000	4.14788e-07	0.0901389	120720000	120740000	0.997887
Higher LBS in Berkshire	1	120580000	120760000	4.14788e-07	0.0901389	120740000	120760000	0.997303
Higher LBS in Berkshire	1	120580000	120760000	4.14788e-07	0.0901389	120700000	120720000	0.998411
Higher LBS in Berkshire	1	120580000	120760000	4.14788e-07	0.0901389	120580000	120600000	0.996895
Higher LBS in Berkshire	1	121420000	121480000	0.00655581	0.0613169	121420000	121440000	0.998461
Higher LBS in Berkshire	1	121420000	121480000	0.00655581	0.0613169	121440000	121460000	0.997584
Higher LBS in Berkshire	1	121420000	121480000	0.00655581	0.0613169	121460000	121480000	0.999092
Higher LBS in Berkshire	1	123220000	123340000	9.41405e-15	0.0568944	123220000	123240000	0.997069
Higher LBS in Berkshire	1	123220000	123340000	9.41405e-15	0.0568944	123240000	123260000	0.999075
Higher LBS in Berkshire	1	123220000	123340000	9.41405e-15	0.0568944	123260000	123280000	0.995836
Higher LBS in Berkshire	1	123220000	123340000	9.41405e-15	0.0568944	123280000	123300000	0.994993
Higher LBS in Berkshire	1	123220000	123340000	9.41405e-15	0.0568944	123300000	123320000	0.996535
Higher LBS in Berkshire	1	123220000	123340000	9.41405e-15	0.0568944	123320000	123340000	0.997401
Higher LBS in Berkshire	1	127600000	127700000	2.16659e-14	0.0559431	127600000	127620000	0.994224
Higher LBS in Berkshire	1	127600000	127700000	2.16659e-14	0.0559431	127620000	127640000	0.99725
Higher LBS in Berkshire	1	127600000	127700000	2.16659e-14	0.0559431	127640000	127660000	0.996421
Higher LBS in Berkshire	1	127600000	127700000	2.16659e-14	0.0559431	127680000	127700000	0.993937
Higher LBS in Berkshire	1	127600000	127700000	2.16659e-14	0.0559431	127660000	127680000	0.997702
Higher LBS in Berkshire	1	130300000	130440000	1.52822e-13	0.0442014	130300000	130320000	0.996579
Higher LBS in Berkshire	1	130300000	130440000	1.52822e-13	0.0442014	130320000	130340000	0.995969
Higher LBS in Berkshire	1	130300000	130440000	1.52822e-13	0.0442014	130340000	130360000	0.998537
Higher LBS in Berkshire	1	130300000	130440000	1.52822e-13	0.0442014	130360000	130380000	0.998439
Higher LBS in Berkshire	1	130300000	130440000	1.52822e-13	0.0442014	130380000	130400000	0.998509
Higher LBS in Berkshire	1	130300000	130440000	1.52822e-13	0.0442014	130420000	130440000	0.9962
Higher LBS in Berkshire	1	130300000	130440000	1.52822e-13	0.0442014	130400000	130420000	0.998056
Higher LBS in Berkshire	1	131720000	131780000	5.10227e-06	0.0544751	131740000	131760000	0.995142
Higher LBS in Berkshire	1	131720000	131780000	5.10227e-06	0.0544751	131760000	131780000	0.997716
Higher LBS in Berkshire	1	131720000	131780000	5.10227e-06	0.0544751	131720000	131740000	0.998217
Higher LBS in Berkshire	1	136180000	136480000	0.0283439	0.133302	136200000	136220000	0.997381
Higher LBS in Berkshire	1	136180000	136480000	0.0283439	0.133302	136220000	136240000	0.996278
Higher LBS in Berkshire	1	136180000	136480000	0.0283439	0.133302	136240000	136260000	0.995164
Higher LBS in Berkshire	1	136180000	136480000	0.0283439	0.133302	136260000	136280000	0.997701
Higher LBS in Berkshire	1	136180000	136480000	0.0283439	0.133302	136280000	136300000	0.997309
Higher LBS in Berkshire	1	136180000	136480000	0.0283439	0.133302	136320000	136340000	0.99325
Higher LBS in Berkshire	1	136180000	136480000	0.0283439	0.133302	136340000	136360000	0.995466
Higher LBS in Berkshire	1	136180000	136480000	0.0283439	0.133302	136360000	136380000	0.996286
Higher LBS in Berkshire	1	136180000	136480000	0.0283439	0.133302	136380000	136400000	0.995896
Higher LBS in Berkshire	1	136180000	136480000	0.0283439	0.133302	136400000	136420000	0.993757
Higher LBS in Berkshire	1	136180000	136480000	0.0283439	0.133302	136420000	136440000	0.997601
Higher LBS in Berkshire	1	136180000	136480000	0.0283439	0.133302	136460000	136480000	0.993615
Higher LBS in Berkshire	1	136180000	136480000	0.0283439	0.133302	136180000	136200000	0.996544
Higher LBS in Berkshire	1	136180000	136480000	0.0283439	0.133302	136440000	136460000	0.994853
Higher LBS in Berkshire	1	136180000	136480000	0.0283439	0.133302	136300000	136320000	0.993725
Higher LBS in Berkshire	1	140980000	141080000	0.0200344	0.119742	140980000	141000000	0.993992
Higher LBS in Berkshire	1	140980000	141080000	0.0200344	0.119742	141000000	141020000	0.978512
Higher LBS in Berkshire	1	140980000	141080000	0.0200344	0.119742	141040000	141060000	0.995538
Higher LBS in Berkshire	1	140980000	141080000	0.0200344	0.119742	141060000	141080000	0.99429
Higher LBS in Berkshire	1	140980000	141080000	0.0200344	0.119742	141020000	141040000	0.993763
Higher LBS in Berkshire	1	143720000	143800000	8.74703e-14	0.0386698	143720000	143740000	0.994197
Higher LBS in Berkshire	1	143720000	143800000	8.74703e-14	0.0386698	143740000	143760000	0.995238
Higher LBS in Berkshire	1	143720000	143800000	8.74703e-14	0.0386698	143760000	143780000	0.990869
Higher LBS in Berkshire	1	143720000	143800000	8.74703e-14	0.0386698	143780000	143800000	0.995904
Higher LBS in Berkshire	1	145280000	145340000	1.85443e-24	0.0377793	145280000	145300000	0.993126
Higher LBS in Berkshire	1	145280000	145340000	1.85443e-24	0.0377793	145300000	145320000	0.989143
Higher LBS in Berkshire	1	145280000	145340000	1.85443e-24	0.0377793	145320000	145340000	0.99441
Higher LBS in Berkshire	1	147100000	147180000	2.94832e-13	0.0504615	147100000	147120000	0.995662
Higher LBS in Berkshire	1	147100000	147180000	2.94832e-13	0.0504615	147120000	147140000	0.991201
Higher LBS in Berkshire	1	147100000	147180000	2.94832e-13	0.0504615	147140000	147160000	0.990903
Higher LBS in Berkshire	1	147100000	147180000	2.94832e-13	0.0504615	147160000	147180000	0.993786
Higher LBS in Berkshire	1	148780000	148900000	2.75521e-12	0.0480678	148780000	148800000	0.995147
Higher LBS in Berkshire	1	148780000	148900000	2.75521e-12	0.0480678	148800000	148820000	0.995702
Higher LBS in Berkshire	1	148780000	148900000	2.75521e-12	0.0480678	148820000	148840000	0.992669
Higher LBS in Berkshire	1	148780000	148900000	2.75521e-12	0.0480678	148840000	148860000	0.996433
Higher LBS in Berkshire	1	148780000	148900000	2.75521e-12	0.0480678	148860000	148880000	0.994017
Higher LBS in Berkshire	1	148780000	148900000	2.75521e-12	0.0480678	148880000	148900000	0.990713
Higher LBS in Berkshire	1	150180000	150460000	4.74873e-10	0.176231	150180000	150200000	0.994966
Higher LBS in Berkshire	1	150180000	150460000	4.74873e-10	0.176231	150220000	150240000	0.989813
Higher LBS in Berkshire	1	150180000	150460000	4.74873e-10	0.176231	150240000	150260000	0.992764
Higher LBS in Berkshire	1	150180000	150460000	4.74873e-10	0.176231	150260000	150280000	0.993041
Higher LBS in Berkshire	1	150180000	150460000	4.74873e-10	0.176231	150280000	150300000	0.991883
Higher LBS in Berkshire	1	150180000	150460000	4.74873e-10	0.176231	150300000	150320000	0.995211
Higher LBS in Berkshire	1	150180000	150460000	4.74873e-10	0.176231	150340000	150360000	0.997615
Higher LBS in Berkshire	1	150180000	150460000	4.74873e-10	0.176231	150360000	150380000	0.992363
Higher LBS in Berkshire	1	150180000	150460000	4.74873e-10	0.176231	150380000	150400000	0.995044
Higher LBS in Berkshire	1	150180000	150460000	4.74873e-10	0.176231	150400000	150420000	0.996029
Higher LBS in Berkshire	1	150180000	150460000	4.74873e-10	0.176231	150420000	150440000	0.998126
Higher LBS in Berkshire	1	150180000	150460000	4.74873e-10	0.176231	150440000	150460000	0.997283
Higher LBS in Berkshire	1	150180000	150460000	4.74873e-10	0.176231	150200000	150220000	0.994811
Higher LBS in Berkshire	1	150180000	150460000	4.74873e-10	0.176231	150320000	150340000	0.995915
Higher LBS in Berkshire	1	158060000	158240000	3.25217e-05	0.0936064	158080000	158100000	0.996843
Higher LBS in Berkshire	1	158060000	158240000	3.25217e-05	0.0936064	158100000	158120000	0.996006
Higher LBS in Berkshire	1	158060000	158240000	3.25217e-05	0.0936064	158120000	158140000	0.9949
Higher LBS in Berkshire	1	158060000	158240000	3.25217e-05	0.0936064	158140000	158160000	0.9982
Higher LBS in Berkshire	1	158060000	158240000	3.25217e-05	0.0936064	158160000	158180000	0.991524
Higher LBS in Berkshire	1	158060000	158240000	3.25217e-05	0.0936064	158180000	158200000	0.995581
Higher LBS in Berkshire	1	158060000	158240000	3.25217e-05	0.0936064	158220000	158240000	0.997967
Higher LBS in Berkshire	1	158060000	158240000	3.25217e-05	0.0936064	158060000	158080000	0.999911
Higher LBS in Berkshire	1	158060000	158240000	3.25217e-05	0.0936064	158200000	158220000	0.994871
Higher LBS in Berkshire	1	159420000	159560000	1.08342e-08	0.0578941	159420000	159440000	0.985639
Higher LBS in Berkshire	1	159420000	159560000	1.08342e-08	0.0578941	159440000	159460000	0.995474
Higher LBS in Berkshire	1	159420000	159560000	1.08342e-08	0.0578941	159460000	159480000	0.995491
Higher LBS in Berkshire	1	159420000	159560000	1.08342e-08	0.0578941	159480000	159500000	0.995672
Higher LBS in Berkshire	1	159420000	159560000	1.08342e-08	0.0578941	159520000	159540000	0.992581
Higher LBS in Berkshire	1	159420000	159560000	1.08342e-08	0.0578941	159540000	159560000	0.996944
Higher LBS in Berkshire	1	159420000	159560000	1.08342e-08	0.0578941	159500000	159520000	0.991363
Higher LBS in Berkshire	1	169080000	169140000	0.000262399	0.0836002	169100000	169120000	0.992315
Higher LBS in Berkshire	1	169080000	169140000	0.000262399	0.0836002	169120000	169140000	0.995771
Higher LBS in Berkshire	1	169080000	169140000	0.000262399	0.0836002	169080000	169100000	0.995339
Higher LBS in Berkshire	1	171460000	171540000	0.000157096	0.0689359	171460000	171480000	0.998714
Higher LBS in Berkshire	1	171460000	171540000	0.000157096	0.0689359	171480000	171500000	0.998509
Higher LBS in Berkshire	1	171460000	171540000	0.000157096	0.0689359	171500000	171520000	0.994512
Higher LBS in Berkshire	1	171460000	171540000	0.000157096	0.0689359	171520000	171540000	0.989722
Higher LBS in Berkshire	1	173880000	174240000	2.19426e-09	0.0838529	173880000	173900000	0.993156
Higher LBS in Berkshire	1	173880000	174240000	2.19426e-09	0.0838529	173900000	173920000	0.996334
Higher LBS in Berkshire	1	173880000	174240000	2.19426e-09	0.0838529	173940000	173960000	0.995207
Higher LBS in Berkshire	1	173880000	174240000	2.19426e-09	0.0838529	173960000	173980000	0.997995
Higher LBS in Berkshire	1	173880000	174240000	2.19426e-09	0.0838529	173980000	174000000	0.995279
Higher LBS in Berkshire	1	173880000	174240000	2.19426e-09	0.0838529	174000000	174020000	0.990977
Higher LBS in Berkshire	1	173880000	174240000	2.19426e-09	0.0838529	174020000	174040000	0.992112
Higher LBS in Berkshire	1	173880000	174240000	2.19426e-09	0.0838529	174040000	174060000	0.995074
Higher LBS in Berkshire	1	173880000	174240000	2.19426e-09	0.0838529	174080000	174100000	0.994059
Higher LBS in Berkshire	1	173880000	174240000	2.19426e-09	0.0838529	174100000	174120000	0.993941
Higher LBS in Berkshire	1	173880000	174240000	2.19426e-09	0.0838529	174120000	174140000	0.990291
Higher LBS in Berkshire	1	173880000	174240000	2.19426e-09	0.0838529	174140000	174160000	0.995912
Higher LBS in Berkshire	1	173880000	174240000	2.19426e-09	0.0838529	174160000	174180000	0.998914
Higher LBS in Berkshire	1	173880000	174240000	2.19426e-09	0.0838529	174200000	174220000	0.991973
Higher LBS in Berkshire	1	173880000	174240000	2.19426e-09	0.0838529	174220000	174240000	0.993346
Higher LBS in Berkshire	1	173880000	174240000	2.19426e-09	0.0838529	173920000	173940000	0.996505
Higher LBS in Berkshire	1	173880000	174240000	2.19426e-09	0.0838529	174180000	174200000	0.995461
Higher LBS in Berkshire	1	173880000	174240000	2.19426e-09	0.0838529	174060000	174080000	0.993533
Higher LBS in Berkshire	1	177860000	178180000	2.32565e-07	0.194672	177880000	177900000	0.994498
Higher LBS in Berkshire	1	177860000	178180000	2.32565e-07	0.194672	177900000	177920000	0.998079
Higher LBS in Berkshire	1	177860000	178180000	2.32565e-07	0.194672	177920000	177940000	0.997656
Higher LBS in Berkshire	1	177860000	178180000	2.32565e-07	0.194672	177940000	177960000	0.996781
Higher LBS in Berkshire	1	177860000	178180000	2.32565e-07	0.194672	177960000	177980000	0.996634
Higher LBS in Berkshire	1	177860000	178180000	2.32565e-07	0.194672	178000000	178020000	0.993662
Higher LBS in Berkshire	1	177860000	178180000	2.32565e-07	0.194672	178020000	178040000	0.993987
Higher LBS in Berkshire	1	177860000	178180000	2.32565e-07	0.194672	178040000	178060000	0.997001
Higher LBS in Berkshire	1	177860000	178180000	2.32565e-07	0.194672	178060000	178080000	0.996417
Higher LBS in Berkshire	1	177860000	178180000	2.32565e-07	0.194672	178080000	178100000	0.997425
Higher LBS in Berkshire	1	177860000	178180000	2.32565e-07	0.194672	178100000	178120000	0.996564
Higher LBS in Berkshire	1	177860000	178180000	2.32565e-07	0.194672	178140000	178160000	0.996674
Higher LBS in Berkshire	1	177860000	178180000	2.32565e-07	0.194672	178160000	178180000	0.993203
Higher LBS in Berkshire	1	177860000	178180000	2.32565e-07	0.194672	177860000	177880000	0.994106
Higher LBS in Berkshire	1	177860000	178180000	2.32565e-07	0.194672	177980000	178000000	0.996129
Higher LBS in Berkshire	1	177860000	178180000	2.32565e-07	0.194672	178120000	178140000	0.995079
Higher LBS in Berkshire	1	178640000	178760000	4.9941e-06	0.0741535	178660000	178680000	0.996018
Higher LBS in Berkshire	1	178640000	178760000	4.9941e-06	0.0741535	178680000	178700000	0.994625
Higher LBS in Berkshire	1	178640000	178760000	4.9941e-06	0.0741535	178700000	178720000	0.989097
Higher LBS in Berkshire	1	178640000	178760000	4.9941e-06	0.0741535	178720000	178740000	0.993248
Higher LBS in Berkshire	1	178640000	178760000	4.9941e-06	0.0741535	178740000	178760000	0.992987
Higher LBS in Berkshire	1	178640000	178760000	4.9941e-06	0.0741535	178640000	178660000	0.995759
Higher LBS in Berkshire	1	179780000	179880000	9.58102e-09	0.0567544	179780000	179800000	0.995605
Higher LBS in Berkshire	1	179780000	179880000	9.58102e-09	0.0567544	179800000	179820000	0.995124
Higher LBS in Berkshire	1	179780000	179880000	9.58102e-09	0.0567544	179840000	179860000	0.995762
Higher LBS in Berkshire	1	179780000	179880000	9.58102e-09	0.0567544	179860000	179880000	0.999011
Higher LBS in Berkshire	1	179780000	179880000	9.58102e-09	0.0567544	179820000	179840000	0.995871
Higher LBS in Berkshire	1	180440000	180560000	7.81183e-13	0.0363792	180440000	180460000	0.999332
Higher LBS in Berkshire	1	180440000	180560000	7.81183e-13	0.0363792	180460000	180480000	0.999039
Higher LBS in Berkshire	1	180440000	180560000	7.81183e-13	0.0363792	180500000	180520000	0.997515
Higher LBS in Berkshire	1	180440000	180560000	7.81183e-13	0.0363792	180520000	180540000	0.993587
Higher LBS in Berkshire	1	180440000	180560000	7.81183e-13	0.0363792	180540000	180560000	0.992076
Higher LBS in Berkshire	1	180440000	180560000	7.81183e-13	0.0363792	180480000	180500000	0.997024
Higher LBS in Berkshire	1	181880000	182040000	3.00288e-07	0.0517741	181880000	181900000	0.993963
Higher LBS in Berkshire	1	181880000	182040000	3.00288e-07	0.0517741	181900000	181920000	0.99049
Higher LBS in Berkshire	1	181880000	182040000	3.00288e-07	0.0517741	181940000	181960000	0.990172
Higher LBS in Berkshire	1	181880000	182040000	3.00288e-07	0.0517741	181960000	181980000	0.996547
Higher LBS in Berkshire	1	181880000	182040000	3.00288e-07	0.0517741	181980000	182000000	0.994878
Higher LBS in Berkshire	1	181880000	182040000	3.00288e-07	0.0517741	182000000	182020000	0.996844
Higher LBS in Berkshire	1	181880000	182040000	3.00288e-07	0.0517741	182020000	182040000	0.995254
Higher LBS in Berkshire	1	181880000	182040000	3.00288e-07	0.0517741	181920000	181940000	0.98369
Higher LBS in Berkshire	1	183320000	183380000	2.70913e-09	0.0551636	183320000	183340000	0.997562
Higher LBS in Berkshire	1	183320000	183380000	2.70913e-09	0.0551636	183340000	183360000	0.992252
Higher LBS in Berkshire	1	183320000	183380000	2.70913e-09	0.0551636	183360000	183380000	0.995572
Higher LBS in Berkshire	1	187540000	187660000	1.86288e-11	0.0558499	187540000	187560000	0.998326
Higher LBS in Berkshire	1	187540000	187660000	1.86288e-11	0.0558499	187580000	187600000	0.995547
Higher LBS in Berkshire	1	187540000	187660000	1.86288e-11	0.0558499	187600000	187620000	0.996913
Higher LBS in Berkshire	1	187540000	187660000	1.86288e-11	0.0558499	187620000	187640000	0.995069
Higher LBS in Berkshire	1	187540000	187660000	1.86288e-11	0.0558499	187640000	187660000	0.995596
Higher LBS in Berkshire	1	187540000	187660000	1.86288e-11	0.0558499	187560000	187580000	0.997354
Higher LBS in Berkshire	1	188700000	188800000	0.000636417	0.0720256	188700000	188720000	0.992663
Higher LBS in Berkshire	1	188700000	188800000	0.000636417	0.0720256	188720000	188740000	0.993599
Higher LBS in Berkshire	1	188700000	188800000	0.000636417	0.0720256	188760000	188780000	0.99537
Higher LBS in Berkshire	1	188700000	188800000	0.000636417	0.0720256	188780000	188800000	0.99704
Higher LBS in Berkshire	1	188700000	188800000	0.000636417	0.0720256	188740000	188760000	0.992104
Higher LBS in Berkshire	1	189900000	189960000	8.94623e-11	0.0382955	189900000	189920000	0.996029
Higher LBS in Berkshire	1	189900000	189960000	8.94623e-11	0.0382955	189940000	189960000	0.99627
Higher LBS in Berkshire	1	189900000	189960000	8.94623e-11	0.0382955	189920000	189940000	0.995565
Higher LBS in Berkshire	1	191300000	191720000	1.05559e-17	0.0551323	191300000	191320000	0.995362
Higher LBS in Berkshire	1	191300000	191720000	1.05559e-17	0.0551323	191320000	191340000	0.992247
Higher LBS in Berkshire	1	191300000	191720000	1.05559e-17	0.0551323	191340000	191360000	0.995754
Higher LBS in Berkshire	1	191300000	191720000	1.05559e-17	0.0551323	191380000	191400000	0.997917
Higher LBS in Berkshire	1	191300000	191720000	1.05559e-17	0.0551323	191400000	191420000	0.995993
Higher LBS in Berkshire	1	191300000	191720000	1.05559e-17	0.0551323	191420000	191440000	0.987929
Higher LBS in Berkshire	1	191300000	191720000	1.05559e-17	0.0551323	191440000	191460000	0.992012
Higher LBS in Berkshire	1	191300000	191720000	1.05559e-17	0.0551323	191460000	191480000	0.99142
Higher LBS in Berkshire	1	191300000	191720000	1.05559e-17	0.0551323	191500000	191520000	0.994011
Higher LBS in Berkshire	1	191300000	191720000	1.05559e-17	0.0551323	191520000	191540000	0.997701
Higher LBS in Berkshire	1	191300000	191720000	1.05559e-17	0.0551323	191540000	191560000	0.994797
Higher LBS in Berkshire	1	191300000	191720000	1.05559e-17	0.0551323	191560000	191580000	0.993995
Higher LBS in Berkshire	1	191300000	191720000	1.05559e-17	0.0551323	191580000	191600000	0.990727
Higher LBS in Berkshire	1	191300000	191720000	1.05559e-17	0.0551323	191600000	191620000	0.996538
Higher LBS in Berkshire	1	191300000	191720000	1.05559e-17	0.0551323	191640000	191660000	0.997174
Higher LBS in Berkshire	1	191300000	191720000	1.05559e-17	0.0551323	191660000	191680000	0.996011
Higher LBS in Berkshire	1	191300000	191720000	1.05559e-17	0.0551323	191680000	191700000	0.994829
Higher LBS in Berkshire	1	191300000	191720000	1.05559e-17	0.0551323	191700000	191720000	0.994777
Higher LBS in Berkshire	1	191300000	191720000	1.05559e-17	0.0551323	191360000	191380000	0.993343
Higher LBS in Berkshire	1	191300000	191720000	1.05559e-17	0.0551323	191480000	191500000	0.994276
Higher LBS in Berkshire	1	191300000	191720000	1.05559e-17	0.0551323	191620000	191640000	0.993497
Higher LBS in Berkshire	1	193420000	193800000	3.03619e-09	0.0599269	193420000	193440000	0.995498
Higher LBS in Berkshire	1	193420000	193800000	3.03619e-09	0.0599269	193440000	193460000	0.994819
Higher LBS in Berkshire	1	193420000	193800000	3.03619e-09	0.0599269	193480000	193500000	0.996643
Higher LBS in Berkshire	1	193420000	193800000	3.03619e-09	0.0599269	193500000	193520000	0.991924
Higher LBS in Berkshire	1	193420000	193800000	3.03619e-09	0.0599269	193520000	193540000	0.99711
Higher LBS in Berkshire	1	193420000	193800000	3.03619e-09	0.0599269	193540000	193560000	0.996003
Higher LBS in Berkshire	1	193420000	193800000	3.03619e-09	0.0599269	193560000	193580000	0.994437
Higher LBS in Berkshire	1	193420000	193800000	3.03619e-09	0.0599269	193600000	193620000	0.994104
Higher LBS in Berkshire	1	193420000	193800000	3.03619e-09	0.0599269	193620000	193640000	0.996942
Higher LBS in Berkshire	1	193420000	193800000	3.03619e-09	0.0599269	193640000	193660000	0.997386
Higher LBS in Berkshire	1	193420000	193800000	3.03619e-09	0.0599269	193660000	193680000	0.991159
Higher LBS in Berkshire	1	193420000	193800000	3.03619e-09	0.0599269	193680000	193700000	0.990681
Higher LBS in Berkshire	1	193420000	193800000	3.03619e-09	0.0599269	193700000	193720000	0.996496
Higher LBS in Berkshire	1	193420000	193800000	3.03619e-09	0.0599269	193740000	193760000	0.984313
Higher LBS in Berkshire	1	193420000	193800000	3.03619e-09	0.0599269	193760000	193780000	0.99439
Higher LBS in Berkshire	1	193420000	193800000	3.03619e-09	0.0599269	193780000	193800000	0.995935
Higher LBS in Berkshire	1	193420000	193800000	3.03619e-09	0.0599269	193460000	193480000	0.99303
Higher LBS in Berkshire	1	193420000	193800000	3.03619e-09	0.0599269	193580000	193600000	0.988373
Higher LBS in Berkshire	1	193420000	193800000	3.03619e-09	0.0599269	193720000	193740000	0.986055
Higher LBS in Berkshire	1	194520000	194680000	2.34194e-05	0.0366998	194520000	194540000	0.996627
Higher LBS in Berkshire	1	194520000	194680000	2.34194e-05	0.0366998	194540000	194560000	0.994886
Higher LBS in Berkshire	1	194520000	194680000	2.34194e-05	0.0366998	194560000	194580000	0.994148
Higher LBS in Berkshire	1	194520000	194680000	2.34194e-05	0.0366998	194580000	194600000	0.994028
Higher LBS in Berkshire	1	194520000	194680000	2.34194e-05	0.0366998	194600000	194620000	0.996231
Higher LBS in Berkshire	1	194520000	194680000	2.34194e-05	0.0366998	194620000	194640000	0.998362
Higher LBS in Berkshire	1	194520000	194680000	2.34194e-05	0.0366998	194660000	194680000	0.996921
Higher LBS in Berkshire	1	194520000	194680000	2.34194e-05	0.0366998	194640000	194660000	0.997422
Higher LBS in Berkshire	1	195400000	195560000	1.52983e-08	0.0913347	195400000	195420000	0.994982
Higher LBS in Berkshire	1	195400000	195560000	1.52983e-08	0.0913347	195440000	195460000	0.993445
Higher LBS in Berkshire	1	195400000	195560000	1.52983e-08	0.0913347	195460000	195480000	0.991385
Higher LBS in Berkshire	1	195400000	195560000	1.52983e-08	0.0913347	195480000	195500000	0.992147
Higher LBS in Berkshire	1	195400000	195560000	1.52983e-08	0.0913347	195500000	195520000	0.993088
Higher LBS in Berkshire	1	195400000	195560000	1.52983e-08	0.0913347	195520000	195540000	0.991182
Higher LBS in Berkshire	1	195400000	195560000	1.52983e-08	0.0913347	195420000	195440000	0.995134
Higher LBS in Berkshire	1	195400000	195560000	1.52983e-08	0.0913347	195540000	195560000	0.990587
Higher LBS in Berkshire	1	196920000	197160000	1.26116e-27	0.0822366	196920000	196940000	0.995418
Higher LBS in Berkshire	1	196920000	197160000	1.26116e-27	0.0822366	196940000	196960000	0.993313
Higher LBS in Berkshire	1	196920000	197160000	1.26116e-27	0.0822366	196960000	196980000	0.99361
Higher LBS in Berkshire	1	196920000	197160000	1.26116e-27	0.0822366	196980000	197000000	0.996255
Higher LBS in Berkshire	1	196920000	197160000	1.26116e-27	0.0822366	197020000	197040000	0.996752
Higher LBS in Berkshire	1	196920000	197160000	1.26116e-27	0.0822366	197040000	197060000	0.997758
Higher LBS in Berkshire	1	196920000	197160000	1.26116e-27	0.0822366	197060000	197080000	0.996482
Higher LBS in Berkshire	1	196920000	197160000	1.26116e-27	0.0822366	197080000	197100000	0.997434
Higher LBS in Berkshire	1	196920000	197160000	1.26116e-27	0.0822366	197100000	197120000	0.997237
Higher LBS in Berkshire	1	196920000	197160000	1.26116e-27	0.0822366	197140000	197160000	0.998612
Higher LBS in Berkshire	1	196920000	197160000	1.26116e-27	0.0822366	197000000	197020000	0.996013
Higher LBS in Berkshire	1	196920000	197160000	1.26116e-27	0.0822366	197120000	197140000	0.997292
Higher LBS in Berkshire	1	200560000	200840000	3.6376e-10	0.0636897	200560000	200580000	0.993484
Higher LBS in Berkshire	1	200560000	200840000	3.6376e-10	0.0636897	200580000	200600000	0.997701
Higher LBS in Berkshire	1	200560000	200840000	3.6376e-10	0.0636897	200600000	200620000	0.994301
Higher LBS in Berkshire	1	200560000	200840000	3.6376e-10	0.0636897	200620000	200640000	0.995442
Higher LBS in Berkshire	1	200560000	200840000	3.6376e-10	0.0636897	200640000	200660000	0.995601
Higher LBS in Berkshire	1	200560000	200840000	3.6376e-10	0.0636897	200680000	200700000	0.994985
Higher LBS in Berkshire	1	200560000	200840000	3.6376e-10	0.0636897	200700000	200720000	0.993013
Higher LBS in Berkshire	1	200560000	200840000	3.6376e-10	0.0636897	200720000	200740000	0.996324
Higher LBS in Berkshire	1	200560000	200840000	3.6376e-10	0.0636897	200740000	200760000	0.996261
Higher LBS in Berkshire	1	200560000	200840000	3.6376e-10	0.0636897	200760000	200780000	0.997457
Higher LBS in Berkshire	1	200560000	200840000	3.6376e-10	0.0636897	200780000	200800000	0.99615
Higher LBS in Berkshire	1	200560000	200840000	3.6376e-10	0.0636897	200820000	200840000	0.995708
Higher LBS in Berkshire	1	200560000	200840000	3.6376e-10	0.0636897	200660000	200680000	0.99712
Higher LBS in Berkshire	1	200560000	200840000	3.6376e-10	0.0636897	200800000	200820000	0.997995
Higher LBS in Berkshire	1	201260000	201340000	4.27113e-07	0.115325	201260000	201280000	0.997859
Higher LBS in Berkshire	1	201260000	201340000	4.27113e-07	0.115325	201280000	201300000	0.997882
Higher LBS in Berkshire	1	201260000	201340000	4.27113e-07	0.115325	201300000	201320000	0.99681
Higher LBS in Berkshire	1	201260000	201340000	4.27113e-07	0.115325	201320000	201340000	0.996285
Higher LBS in Berkshire	1	202180000	202240000	1.99186e-07	0.086951	202180000	202200000	0.998784
Higher LBS in Berkshire	1	202180000	202240000	1.99186e-07	0.086951	202200000	202220000	0.998679
Higher LBS in Berkshire	1	202180000	202240000	1.99186e-07	0.086951	202220000	202240000	0.998428
Higher LBS in Berkshire	1	202600000	202720000	3.72476e-05	0.105641	202600000	202620000	0.998453
Higher LBS in Berkshire	1	202600000	202720000	3.72476e-05	0.105641	202640000	202660000	0.995563
Higher LBS in Berkshire	1	202600000	202720000	3.72476e-05	0.105641	202660000	202680000	0.996527
Higher LBS in Berkshire	1	202600000	202720000	3.72476e-05	0.105641	202680000	202700000	0.992893
Higher LBS in Berkshire	1	202600000	202720000	3.72476e-05	0.105641	202700000	202720000	0.997132
Higher LBS in Berkshire	1	202600000	202720000	3.72476e-05	0.105641	202620000	202640000	0.997342
Higher LBS in Berkshire	1	204240000	204420000	2.1737e-91	0.0451276	204240000	204260000	0.997585
Higher LBS in Berkshire	1	204240000	204420000	2.1737e-91	0.0451276	204260000	204280000	0.993127
Higher LBS in Berkshire	1	204240000	204420000	2.1737e-91	0.0451276	204280000	204300000	0.996713
Higher LBS in Berkshire	1	204240000	204420000	2.1737e-91	0.0451276	204300000	204320000	0.99649
Higher LBS in Berkshire	1	204240000	204420000	2.1737e-91	0.0451276	204320000	204340000	0.996043
Higher LBS in Berkshire	1	204240000	204420000	2.1737e-91	0.0451276	204360000	204380000	0.997147
Higher LBS in Berkshire	1	204240000	204420000	2.1737e-91	0.0451276	204380000	204400000	0.998595
Higher LBS in Berkshire	1	204240000	204420000	2.1737e-91	0.0451276	204400000	204420000	0.998367
Higher LBS in Berkshire	1	204240000	204420000	2.1737e-91	0.0451276	204340000	204360000	0.993087
Higher LBS in Berkshire	1	205080000	205160000	0.00909179	0.0568319	205080000	205100000	0.993583
Higher LBS in Berkshire	1	205080000	205160000	0.00909179	0.0568319	205100000	205120000	0.990958
Higher LBS in Berkshire	1	205080000	205160000	0.00909179	0.0568319	205140000	205160000	0.995782
Higher LBS in Berkshire	1	205080000	205160000	0.00909179	0.0568319	205120000	205140000	0.986189
Higher LBS in Berkshire	1	206760000	206860000	7.69761e-08	0.0359866	206760000	206780000	0.994544
Higher LBS in Berkshire	1	206760000	206860000	7.69761e-08	0.0359866	206780000	206800000	0.997662
Higher LBS in Berkshire	1	206760000	206860000	7.69761e-08	0.0359866	206800000	206820000	0.997764
Higher LBS in Berkshire	1	206760000	206860000	7.69761e-08	0.0359866	206840000	206860000	0.997613
Higher LBS in Berkshire	1	206760000	206860000	7.69761e-08	0.0359866	206820000	206840000	0.994343
Higher LBS in Berkshire	1	210260000	210320000	1.94238e-08	0.067429	210260000	210280000	0.99385
Higher LBS in Berkshire	1	210260000	210320000	1.94238e-08	0.067429	210280000	210300000	0.996099
Higher LBS in Berkshire	1	210260000	210320000	1.94238e-08	0.067429	210300000	210320000	0.995997
Higher LBS in Berkshire	1	214340000	214440000	2.2714e-08	0.0547469	214340000	214360000	0.995934
Higher LBS in Berkshire	1	214340000	214440000	2.2714e-08	0.0547469	214360000	214380000	0.996912
Higher LBS in Berkshire	1	214340000	214440000	2.2714e-08	0.0547469	214380000	214400000	0.992956
Higher LBS in Berkshire	1	214340000	214440000	2.2714e-08	0.0547469	214400000	214420000	0.995191
Higher LBS in Berkshire	1	214340000	214440000	2.2714e-08	0.0547469	214420000	214440000	0.994751
Higher LBS in Berkshire	1	220500000	220680000	9.86349e-06	0.0757824	220500000	220520000	0.991693
Higher LBS in Berkshire	1	220500000	220680000	9.86349e-06	0.0757824	220520000	220540000	0.993804
Higher LBS in Berkshire	1	220500000	220680000	9.86349e-06	0.0757824	220540000	220560000	0.994411
Higher LBS in Berkshire	1	220500000	220680000	9.86349e-06	0.0757824	220560000	220580000	0.995613
Higher LBS in Berkshire	1	220500000	220680000	9.86349e-06	0.0757824	220600000	220620000	0.999375
Higher LBS in Berkshire	1	220500000	220680000	9.86349e-06	0.0757824	220620000	220640000	0.995997
Higher LBS in Berkshire	1	220500000	220680000	9.86349e-06	0.0757824	220640000	220660000	0.994345
Higher LBS in Berkshire	1	220500000	220680000	9.86349e-06	0.0757824	220660000	220680000	0.996205
Higher LBS in Berkshire	1	220500000	220680000	9.86349e-06	0.0757824	220580000	220600000	0.996903
Higher LBS in Berkshire	1	220900000	221040000	1.25188e-05	0.0880133	220900000	220920000	0.987312
Higher LBS in Berkshire	1	220900000	221040000	1.25188e-05	0.0880133	220920000	220940000	0.987672
Higher LBS in Berkshire	1	220900000	221040000	1.25188e-05	0.0880133	220940000	220960000	0.98899
Higher LBS in Berkshire	1	220900000	221040000	1.25188e-05	0.0880133	220960000	220980000	0.994935
Higher LBS in Berkshire	1	220900000	221040000	1.25188e-05	0.0880133	221000000	221020000	0.995054
Higher LBS in Berkshire	1	220900000	221040000	1.25188e-05	0.0880133	221020000	221040000	0.986857
Higher LBS in Berkshire	1	220900000	221040000	1.25188e-05	0.0880133	220980000	221000000	0.988819
Higher LBS in Berkshire	1	221540000	221640000	1.58603e-09	0.0773905	221540000	221560000	0.991717
Higher LBS in Berkshire	1	221540000	221640000	1.58603e-09	0.0773905	221560000	221580000	0.995364
Higher LBS in Berkshire	1	221540000	221640000	1.58603e-09	0.0773905	221580000	221600000	0.986905
Higher LBS in Berkshire	1	221540000	221640000	1.58603e-09	0.0773905	221600000	221620000	0.984661
Higher LBS in Berkshire	1	221540000	221640000	1.58603e-09	0.0773905	221620000	221640000	0.991327
Higher LBS in Berkshire	1	224140000	224220000	3.63704e-07	0.0547138	224140000	224160000	0.993859
Higher LBS in Berkshire	1	224140000	224220000	3.63704e-07	0.0547138	224160000	224180000	0.992461
Higher LBS in Berkshire	1	224140000	224220000	3.63704e-07	0.0547138	224180000	224200000	0.997436
Higher LBS in Berkshire	1	224140000	224220000	3.63704e-07	0.0547138	224200000	224220000	0.997216
Higher LBS in Berkshire	1	228040000	228100000	3.50389e-08	0.0405879	228040000	228060000	0.997377
Higher LBS in Berkshire	1	228040000	228100000	3.50389e-08	0.0405879	228080000	228100000	0.995985
Higher LBS in Berkshire	1	228040000	228100000	3.50389e-08	0.0405879	228060000	228080000	0.998823
Higher LBS in Berkshire	1	230900000	230980000	4.58739e-09	0.0492889	230900000	230920000	0.990784
Higher LBS in Berkshire	1	230900000	230980000	4.58739e-09	0.0492889	230920000	230940000	0.991203
Higher LBS in Berkshire	1	230900000	230980000	4.58739e-09	0.0492889	230960000	230980000	0.99367
Higher LBS in Berkshire	1	230900000	230980000	4.58739e-09	0.0492889	230940000	230960000	0.988094
Higher LBS in Berkshire	1	231620000	231700000	0.000254312	0.0848037	231620000	231640000	0.996247
Higher LBS in Berkshire	1	231620000	231700000	0.000254312	0.0848037	231640000	231660000	0.997377
Higher LBS in Berkshire	1	231620000	231700000	0.000254312	0.0848037	231660000	231680000	0.99814
Higher LBS in Berkshire	1	231620000	231700000	0.000254312	0.0848037	231680000	231700000	0.997257
Higher LBS in Berkshire	1	235980000	236040000	1.92511e-11	0.0316292	235980000	236000000	0.996174
Higher LBS in Berkshire	1	235980000	236040000	1.92511e-11	0.0316292	236000000	236020000	0.997878
Higher LBS in Berkshire	1	235980000	236040000	1.92511e-11	0.0316292	236020000	236040000	0.997359
Higher LBS in Berkshire	1	236640000	236760000	2.72574e-06	0.090208	236640000	236660000	0.994424
Higher LBS in Berkshire	1	236640000	236760000	2.72574e-06	0.090208	236660000	236680000	0.990286
Higher LBS in Berkshire	1	236640000	236760000	2.72574e-06	0.090208	236680000	236700000	0.991757
Higher LBS in Berkshire	1	236640000	236760000	2.72574e-06	0.090208	236720000	236740000	0.991716
Higher LBS in Berkshire	1	236640000	236760000	2.72574e-06	0.090208	236740000	236760000	0.989855
Higher LBS in Berkshire	1	236640000	236760000	2.72574e-06	0.090208	236700000	236720000	0.992207
Higher LBS in Berkshire	1	237340000	237420000	8.02757e-10	0.0801835	237340000	237360000	0.993632
Higher LBS in Berkshire	1	237340000	237420000	8.02757e-10	0.0801835	237380000	237400000	0.987861
Higher LBS in Berkshire	1	237340000	237420000	8.02757e-10	0.0801835	237400000	237420000	0.989192
Higher LBS in Berkshire	1	237340000	237420000	8.02757e-10	0.0801835	237360000	237380000	0.985233
Higher LBS in Berkshire	1	238400000	238520000	5.98203e-09	0.0505702	238420000	238440000	0.99169
Higher LBS in Berkshire	1	238400000	238520000	5.98203e-09	0.0505702	238440000	238460000	0.990636
Higher LBS in Berkshire	1	238400000	238520000	5.98203e-09	0.0505702	238460000	238480000	0.983361
Higher LBS in Berkshire	1	238400000	238520000	5.98203e-09	0.0505702	238480000	238500000	0.9922
Higher LBS in Berkshire	1	238400000	238520000	5.98203e-09	0.0505702	238500000	238520000	0.989219
Higher LBS in Berkshire	1	238400000	238520000	5.98203e-09	0.0505702	238400000	238420000	0.993431
Higher LBS in Berkshire	1	242220000	242300000	4.22631e-05	0.0589059	242240000	242260000	0.995283
Higher LBS in Berkshire	1	242220000	242300000	4.22631e-05	0.0589059	242260000	242280000	0.993435
Higher LBS in Berkshire	1	242220000	242300000	4.22631e-05	0.0589059	242280000	242300000	0.992012
Higher LBS in Berkshire	1	242220000	242300000	4.22631e-05	0.0589059	242220000	242240000	0.996039
Higher LBS in Berkshire	1	243800000	243960000	2.18195e-05	0.110649	243800000	243820000	0.98999
Higher LBS in Berkshire	1	243800000	243960000	2.18195e-05	0.110649	243820000	243840000	0.992762
Higher LBS in Berkshire	1	243800000	243960000	2.18195e-05	0.110649	243840000	243860000	0.992873
Higher LBS in Berkshire	1	243800000	243960000	2.18195e-05	0.110649	243860000	243880000	0.994586
Higher LBS in Berkshire	1	243800000	243960000	2.18195e-05	0.110649	243880000	243900000	0.983585
Higher LBS in Berkshire	1	243800000	243960000	2.18195e-05	0.110649	243900000	243920000	0.984223
Higher LBS in Berkshire	1	243800000	243960000	2.18195e-05	0.110649	243940000	243960000	0.997635
Higher LBS in Berkshire	1	243800000	243960000	2.18195e-05	0.110649	243920000	243940000	0.994015
Higher LBS in Berkshire	1	248080000	248260000	2.12168e-09	0.0783697	248080000	248100000	0.994829
Higher LBS in Berkshire	1	248080000	248260000	2.12168e-09	0.0783697	248120000	248140000	0.993272
Higher LBS in Berkshire	1	248080000	248260000	2.12168e-09	0.0783697	248140000	248160000	0.994269
Higher LBS in Berkshire	1	248080000	248260000	2.12168e-09	0.0783697	248160000	248180000	0.996136
Higher LBS in Berkshire	1	248080000	248260000	2.12168e-09	0.0783697	248180000	248200000	0.993383
Higher LBS in Berkshire	1	248080000	248260000	2.12168e-09	0.0783697	248200000	248220000	0.991399
Higher LBS in Berkshire	1	248080000	248260000	2.12168e-09	0.0783697	248220000	248240000	0.991993
Higher LBS in Berkshire	1	248080000	248260000	2.12168e-09	0.0783697	248100000	248120000	0.991596
Higher LBS in Berkshire	1	248080000	248260000	2.12168e-09	0.0783697	248240000	248260000	0.987994
Higher LBS in Berkshire	1	249060000	249140000	1.81317e-10	0.0419478	249060000	249080000	0.994996
Higher LBS in Berkshire	1	249060000	249140000	1.81317e-10	0.0419478	249080000	249100000	0.997221
Higher LBS in Berkshire	1	249060000	249140000	1.81317e-10	0.0419478	249100000	249120000	0.992787
Higher LBS in Berkshire	1	249060000	249140000	1.81317e-10	0.0419478	249120000	249140000	0.991479
Higher LBS in Berkshire	1	249720000	249860000	4.84542e-10	0.0713943	249720000	249740000	0.996802
Higher LBS in Berkshire	1	249720000	249860000	4.84542e-10	0.0713943	249740000	249760000	0.990422
Higher LBS in Berkshire	1	249720000	249860000	4.84542e-10	0.0713943	249760000	249780000	0.987042
Higher LBS in Berkshire	1	249720000	249860000	4.84542e-10	0.0713943	249780000	249800000	0.994287
Higher LBS in Berkshire	1	249720000	249860000	4.84542e-10	0.0713943	249800000	249820000	0.994489
Higher LBS in Berkshire	1	249720000	249860000	4.84542e-10	0.0713943	249840000	249860000	0.988732
Higher LBS in Berkshire	1	249720000	249860000	4.84542e-10	0.0713943	249820000	249840000	0.998162
Higher LBS in Berkshire	1	252420000	252520000	1.88104e-10	0.0735785	252420000	252440000	0.991199
Higher LBS in Berkshire	1	252420000	252520000	1.88104e-10	0.0735785	252460000	252480000	0.994473
Higher LBS in Berkshire	1	252420000	252520000	1.88104e-10	0.0735785	252480000	252500000	0.989179
Higher LBS in Berkshire	1	252420000	252520000	1.88104e-10	0.0735785	252500000	252520000	0.976892
Higher LBS in Berkshire	1	252420000	252520000	1.88104e-10	0.0735785	252440000	252460000	0.989166
Higher LBS in Berkshire	1	253080000	253180000	4.56548e-05	0.0582427	253080000	253100000	0.991496
Higher LBS in Berkshire	1	253080000	253180000	4.56548e-05	0.0582427	253120000	253140000	0.983243
Higher LBS in Berkshire	1	253080000	253180000	4.56548e-05	0.0582427	253140000	253160000	0.985625
Higher LBS in Berkshire	1	253080000	253180000	4.56548e-05	0.0582427	253160000	253180000	0.98906
Higher LBS in Berkshire	1	253080000	253180000	4.56548e-05	0.0582427	253100000	253120000	0.985924
Higher LBS in Berkshire	1	261940000	262020000	1.37782e-10	0.0830905	261940000	261960000	0.988257
Higher LBS in Berkshire	1	261940000	262020000	1.37782e-10	0.0830905	261960000	261980000	0.996334
Higher LBS in Berkshire	1	261940000	262020000	1.37782e-10	0.0830905	261980000	262000000	1
Higher LBS in Berkshire	1	261940000	262020000	1.37782e-10	0.0830905	262000000	262020000	0.994268
Higher LBS in Berkshire	1	262240000	262340000	1.13454e-07	0.0464451	262240000	262260000	0.992081
Higher LBS in Berkshire	1	262240000	262340000	1.13454e-07	0.0464451	262280000	262300000	0.991355
Higher LBS in Berkshire	1	262240000	262340000	1.13454e-07	0.0464451	262300000	262320000	0.994315
Higher LBS in Berkshire	1	262240000	262340000	1.13454e-07	0.0464451	262320000	262340000	0.991418
Higher LBS in Berkshire	1	262240000	262340000	1.13454e-07	0.0464451	262260000	262280000	0.990534
Higher LBS in Berkshire	1	263160000	263220000	7.03856e-06	0.0855828	263160000	263180000	0.99036
Higher LBS in Berkshire	1	263160000	263220000	7.03856e-06	0.0855828	263200000	263220000	0.989843
Higher LBS in Berkshire	1	263160000	263220000	7.03856e-06	0.0855828	263180000	263200000	0.991129
Higher LBS in Berkshire	1	266160000	266320000	8.36003e-08	0.0720085	266160000	266180000	0.995174
Higher LBS in Berkshire	1	266160000	266320000	8.36003e-08	0.0720085	266180000	266200000	0.994294
Higher LBS in Berkshire	1	266160000	266320000	8.36003e-08	0.0720085	266220000	266240000	0.993807
Higher LBS in Berkshire	1	266160000	266320000	8.36003e-08	0.0720085	266240000	266260000	0.996141
Higher LBS in Berkshire	1	266160000	266320000	8.36003e-08	0.0720085	266260000	266280000	0.992334
Higher LBS in Berkshire	1	266160000	266320000	8.36003e-08	0.0720085	266280000	266300000	0.99284
Higher LBS in Berkshire	1	266160000	266320000	8.36003e-08	0.0720085	266300000	266320000	0.99344
Higher LBS in Berkshire	1	266160000	266320000	8.36003e-08	0.0720085	266200000	266220000	0.994315
Higher LBS in Berkshire	1	267580000	267840000	2.49289e-46	0.0254135	267580000	267600000	0.987766
Higher LBS in Berkshire	1	267580000	267840000	2.49289e-46	0.0254135	267600000	267620000	0.989496
Higher LBS in Berkshire	1	267580000	267840000	2.49289e-46	0.0254135	267620000	267640000	0.990969
Higher LBS in Berkshire	1	267580000	267840000	2.49289e-46	0.0254135	267660000	267680000	0.986463
Higher LBS in Berkshire	1	267580000	267840000	2.49289e-46	0.0254135	267680000	267700000	0.989267
Higher LBS in Berkshire	1	267580000	267840000	2.49289e-46	0.0254135	267700000	267720000	0.988854
Higher LBS in Berkshire	1	267580000	267840000	2.49289e-46	0.0254135	267720000	267740000	0.986862
Higher LBS in Berkshire	1	267580000	267840000	2.49289e-46	0.0254135	267740000	267760000	0.990627
Higher LBS in Berkshire	1	267580000	267840000	2.49289e-46	0.0254135	267760000	267780000	0.991107
Higher LBS in Berkshire	1	267580000	267840000	2.49289e-46	0.0254135	267800000	267820000	0.990403
Higher LBS in Berkshire	1	267580000	267840000	2.49289e-46	0.0254135	267820000	267840000	0.984903
Higher LBS in Berkshire	1	267580000	267840000	2.49289e-46	0.0254135	267640000	267660000	0.988675
Higher LBS in Berkshire	1	267580000	267840000	2.49289e-46	0.0254135	267780000	267800000	0.98843
Higher LBS in Berkshire	2	2020000	2080000	1.83833e-10	0.0409641	2020000	2040000	0.997212
Higher LBS in Berkshire	2	2020000	2080000	1.83833e-10	0.0409641	2040000	2060000	0.991003
Higher LBS in Berkshire	2	2020000	2080000	1.83833e-10	0.0409641	2060000	2080000	0.990393
Higher LBS in Berkshire	2	2180000	2280000	0.00623316	0.0947711	2180000	2200000	0.998019
Higher LBS in Berkshire	2	2180000	2280000	0.00623316	0.0947711	2200000	2220000	0.985282
Higher LBS in Berkshire	2	2180000	2280000	0.00623316	0.0947711	2240000	2260000	0.984568
Higher LBS in Berkshire	2	2180000	2280000	0.00623316	0.0947711	2260000	2280000	0.986132
Higher LBS in Berkshire	2	2180000	2280000	0.00623316	0.0947711	2220000	2240000	0.980386
Higher LBS in Berkshire	2	13760000	13820000	0.0471578	0.123181	13780000	13800000	0.995825
Higher LBS in Berkshire	2	13760000	13820000	0.0471578	0.123181	13800000	13820000	0.996627
Higher LBS in Berkshire	2	13760000	13820000	0.0471578	0.123181	13760000	13780000	0.995137
Higher LBS in Berkshire	2	14280000	14380000	7.23004e-06	0.407717	14300000	14320000	0.998608
Higher LBS in Berkshire	2	14280000	14380000	7.23004e-06	0.407717	14320000	14340000	0.998867
Higher LBS in Berkshire	2	14280000	14380000	7.23004e-06	0.407717	14340000	14360000	0.999525
Higher LBS in Berkshire	2	14280000	14380000	7.23004e-06	0.407717	14360000	14380000	0.996917
Higher LBS in Berkshire	2	14280000	14380000	7.23004e-06	0.407717	14280000	14300000	0.998736
Higher LBS in Berkshire	2	19300000	19620000	2.81707e-11	0.11731	19300000	19320000	0.992199
Higher LBS in Berkshire	2	19300000	19620000	2.81707e-11	0.11731	19320000	19340000	0.996455
Higher LBS in Berkshire	2	19300000	19620000	2.81707e-11	0.11731	19340000	19360000	0.997328
Higher LBS in Berkshire	2	19300000	19620000	2.81707e-11	0.11731	19360000	19380000	0.99594
Higher LBS in Berkshire	2	19300000	19620000	2.81707e-11	0.11731	19400000	19420000	0.996144
Higher LBS in Berkshire	2	19300000	19620000	2.81707e-11	0.11731	19420000	19440000	0.994783
Higher LBS in Berkshire	2	19300000	19620000	2.81707e-11	0.11731	19440000	19460000	0.994077
Higher LBS in Berkshire	2	19300000	19620000	2.81707e-11	0.11731	19460000	19480000	0.994363
Higher LBS in Berkshire	2	19300000	19620000	2.81707e-11	0.11731	19480000	19500000	0.991096
Higher LBS in Berkshire	2	19300000	19620000	2.81707e-11	0.11731	19500000	19520000	0.993888
Higher LBS in Berkshire	2	19300000	19620000	2.81707e-11	0.11731	19540000	19560000	0.990874
Higher LBS in Berkshire	2	19300000	19620000	2.81707e-11	0.11731	19560000	19580000	0.992311
Higher LBS in Berkshire	2	19300000	19620000	2.81707e-11	0.11731	19580000	19600000	0.993877
Higher LBS in Berkshire	2	19300000	19620000	2.81707e-11	0.11731	19600000	19620000	0.992421
Higher LBS in Berkshire	2	19300000	19620000	2.81707e-11	0.11731	19380000	19400000	0.994863
Higher LBS in Berkshire	2	19300000	19620000	2.81707e-11	0.11731	19520000	19540000	0.994788
Higher LBS in Berkshire	2	20140000	20280000	2.331e-07	0.0566128	20140000	20160000	0.994447
Higher LBS in Berkshire	2	20140000	20280000	2.331e-07	0.0566128	20160000	20180000	0.986525
Higher LBS in Berkshire	2	20140000	20280000	2.331e-07	0.0566128	20200000	20220000	0.988435
Higher LBS in Berkshire	2	20140000	20280000	2.331e-07	0.0566128	20220000	20240000	0.987812
Higher LBS in Berkshire	2	20140000	20280000	2.331e-07	0.0566128	20240000	20260000	0.984324
Higher LBS in Berkshire	2	20140000	20280000	2.331e-07	0.0566128	20260000	20280000	0.986532
Higher LBS in Berkshire	2	20140000	20280000	2.331e-07	0.0566128	20180000	20200000	0.993657
Higher LBS in Berkshire	2	24460000	24660000	5.6126e-06	0.174322	24460000	24480000	0.991703
Higher LBS in Berkshire	2	24460000	24660000	5.6126e-06	0.174322	24480000	24500000	0.99279
Higher LBS in Berkshire	2	24460000	24660000	5.6126e-06	0.174322	24520000	24540000	0.99049
Higher LBS in Berkshire	2	24460000	24660000	5.6126e-06	0.174322	24540000	24560000	0.990514
Higher LBS in Berkshire	2	24460000	24660000	5.6126e-06	0.174322	24560000	24580000	0.991501
Higher LBS in Berkshire	2	24460000	24660000	5.6126e-06	0.174322	24580000	24600000	0.988683
Higher LBS in Berkshire	2	24460000	24660000	5.6126e-06	0.174322	24600000	24620000	0.990354
Higher LBS in Berkshire	2	24460000	24660000	5.6126e-06	0.174322	24620000	24640000	0.993174
Higher LBS in Berkshire	2	24460000	24660000	5.6126e-06	0.174322	24500000	24520000	0.988997
Higher LBS in Berkshire	2	24460000	24660000	5.6126e-06	0.174322	24640000	24660000	0.991983
Higher LBS in Berkshire	2	27280000	27400000	1.51592e-05	0.0600592	27280000	27300000	0.982133
Higher LBS in Berkshire	2	27280000	27400000	1.51592e-05	0.0600592	27300000	27320000	0.98775
Higher LBS in Berkshire	2	27280000	27400000	1.51592e-05	0.0600592	27320000	27340000	0.984795
Higher LBS in Berkshire	2	27280000	27400000	1.51592e-05	0.0600592	27340000	27360000	0.988781
Higher LBS in Berkshire	2	27280000	27400000	1.51592e-05	0.0600592	27360000	27380000	0.988091
Higher LBS in Berkshire	2	27280000	27400000	1.51592e-05	0.0600592	27380000	27400000	0.990854
Higher LBS in Berkshire	2	28220000	28720000	0.00197472	0.0444629	28220000	28240000	0.99235
Higher LBS in Berkshire	2	28220000	28720000	0.00197472	0.0444629	28240000	28260000	0.991625
Higher LBS in Berkshire	2	28220000	28720000	0.00197472	0.0444629	28260000	28280000	0.987672
Higher LBS in Berkshire	2	28220000	28720000	0.00197472	0.0444629	28280000	28300000	0.985287
Higher LBS in Berkshire	2	28220000	28720000	0.00197472	0.0444629	28320000	28340000	0.992779
Higher LBS in Berkshire	2	28220000	28720000	0.00197472	0.0444629	28340000	28360000	0.995215
Higher LBS in Berkshire	2	28220000	28720000	0.00197472	0.0444629	28360000	28380000	0.992882
Higher LBS in Berkshire	2	28220000	28720000	0.00197472	0.0444629	28380000	28400000	0.991771
Higher LBS in Berkshire	2	28220000	28720000	0.00197472	0.0444629	28400000	28420000	0.996069
Higher LBS in Berkshire	2	28220000	28720000	0.00197472	0.0444629	28420000	28440000	0.995537
Higher LBS in Berkshire	2	28220000	28720000	0.00197472	0.0444629	28460000	28480000	0.988525
Higher LBS in Berkshire	2	28220000	28720000	0.00197472	0.0444629	28480000	28500000	0.995007
Higher LBS in Berkshire	2	28220000	28720000	0.00197472	0.0444629	28500000	28520000	0.995504
Higher LBS in Berkshire	2	28220000	28720000	0.00197472	0.0444629	28520000	28540000	0.991138
Higher LBS in Berkshire	2	28220000	28720000	0.00197472	0.0444629	28540000	28560000	0.987693
Higher LBS in Berkshire	2	28220000	28720000	0.00197472	0.0444629	28580000	28600000	0.99262
Higher LBS in Berkshire	2	28220000	28720000	0.00197472	0.0444629	28600000	28620000	0.988231
Higher LBS in Berkshire	2	28220000	28720000	0.00197472	0.0444629	28620000	28640000	0.988488
Higher LBS in Berkshire	2	28220000	28720000	0.00197472	0.0444629	28640000	28660000	0.988645
Higher LBS in Berkshire	2	28220000	28720000	0.00197472	0.0444629	28660000	28680000	0.990187
Higher LBS in Berkshire	2	28220000	28720000	0.00197472	0.0444629	28680000	28700000	0.989257
Higher LBS in Berkshire	2	28220000	28720000	0.00197472	0.0444629	28440000	28460000	0.993649
Higher LBS in Berkshire	2	28220000	28720000	0.00197472	0.0444629	28560000	28580000	0.9904
Higher LBS in Berkshire	2	28220000	28720000	0.00197472	0.0444629	28700000	28720000	0.988489
Higher LBS in Berkshire	2	28220000	28720000	0.00197472	0.0444629	28300000	28320000	0.987015
Higher LBS in Berkshire	2	30260000	30320000	1.75683e-83	0.0315622	30280000	30300000	0.995889
Higher LBS in Berkshire	2	30260000	30320000	1.75683e-83	0.0315622	30300000	30320000	0.994127
Higher LBS in Berkshire	2	30260000	30320000	1.75683e-83	0.0315622	30260000	30280000	0.992377
Higher LBS in Berkshire	2	32740000	32920000	2.98195e-08	0.0902935	32740000	32760000	0.992568
Higher LBS in Berkshire	2	32740000	32920000	2.98195e-08	0.0902935	32780000	32800000	0.9958
Higher LBS in Berkshire	2	32740000	32920000	2.98195e-08	0.0902935	32800000	32820000	0.993154
Higher LBS in Berkshire	2	32740000	32920000	2.98195e-08	0.0902935	32820000	32840000	0.992913
Higher LBS in Berkshire	2	32740000	32920000	2.98195e-08	0.0902935	32840000	32860000	0.995494
Higher LBS in Berkshire	2	32740000	32920000	2.98195e-08	0.0902935	32860000	32880000	0.993006
Higher LBS in Berkshire	2	32740000	32920000	2.98195e-08	0.0902935	32900000	32920000	0.990255
Higher LBS in Berkshire	2	32740000	32920000	2.98195e-08	0.0902935	32760000	32780000	0.995736
Higher LBS in Berkshire	2	32740000	32920000	2.98195e-08	0.0902935	32880000	32900000	0.989492
Higher LBS in Berkshire	2	33660000	33740000	0.00554605	0.0971557	33660000	33680000	0.992985
Higher LBS in Berkshire	2	33660000	33740000	0.00554605	0.0971557	33700000	33720000	0.99399
Higher LBS in Berkshire	2	33660000	33740000	0.00554605	0.0971557	33720000	33740000	0.985246
Higher LBS in Berkshire	2	33660000	33740000	0.00554605	0.0971557	33680000	33700000	0.992727
Higher LBS in Berkshire	2	36400000	36660000	0.0328542	0.0750607	36400000	36420000	0.991221
Higher LBS in Berkshire	2	36400000	36660000	0.0328542	0.0750607	36440000	36460000	0.990394
Higher LBS in Berkshire	2	36400000	36660000	0.0328542	0.0750607	36460000	36480000	0.991222
Higher LBS in Berkshire	2	36400000	36660000	0.0328542	0.0750607	36480000	36500000	0.991106
Higher LBS in Berkshire	2	36400000	36660000	0.0328542	0.0750607	36500000	36520000	0.994107
Higher LBS in Berkshire	2	36400000	36660000	0.0328542	0.0750607	36520000	36540000	0.994418
Higher LBS in Berkshire	2	36400000	36660000	0.0328542	0.0750607	36540000	36560000	0.98996
Higher LBS in Berkshire	2	36400000	36660000	0.0328542	0.0750607	36580000	36600000	0.986334
Higher LBS in Berkshire	2	36400000	36660000	0.0328542	0.0750607	36600000	36620000	0.990836
Higher LBS in Berkshire	2	36400000	36660000	0.0328542	0.0750607	36620000	36640000	0.99206
Higher LBS in Berkshire	2	36400000	36660000	0.0328542	0.0750607	36640000	36660000	0.995946
Higher LBS in Berkshire	2	36400000	36660000	0.0328542	0.0750607	36420000	36440000	0.990009
Higher LBS in Berkshire	2	36400000	36660000	0.0328542	0.0750607	36560000	36580000	0.994534
Higher LBS in Berkshire	2	38680000	38840000	1.4293e-08	0.0864856	38680000	38700000	0.992499
Higher LBS in Berkshire	2	38680000	38840000	1.4293e-08	0.0864856	38700000	38720000	0.992174
Higher LBS in Berkshire	2	38680000	38840000	1.4293e-08	0.0864856	38720000	38740000	0.99282
Higher LBS in Berkshire	2	38680000	38840000	1.4293e-08	0.0864856	38740000	38760000	0.993621
Higher LBS in Berkshire	2	38680000	38840000	1.4293e-08	0.0864856	38760000	38780000	0.992748
Higher LBS in Berkshire	2	38680000	38840000	1.4293e-08	0.0864856	38800000	38820000	0.986102
Higher LBS in Berkshire	2	38680000	38840000	1.4293e-08	0.0864856	38820000	38840000	0.988437
Higher LBS in Berkshire	2	38680000	38840000	1.4293e-08	0.0864856	38780000	38800000	0.992081
Higher LBS in Berkshire	2	44820000	44880000	2.91202e-07	0.0415129	44840000	44860000	0.985818
Higher LBS in Berkshire	2	44820000	44880000	2.91202e-07	0.0415129	44860000	44880000	0.99606
Higher LBS in Berkshire	2	44820000	44880000	2.91202e-07	0.0415129	44820000	44840000	0.994745
Higher LBS in Berkshire	2	48660000	48780000	1.69497e-10	0.0597714	48660000	48680000	0.996396
Higher LBS in Berkshire	2	48660000	48780000	1.69497e-10	0.0597714	48680000	48700000	0.993507
Higher LBS in Berkshire	2	48660000	48780000	1.69497e-10	0.0597714	48700000	48720000	0.995186
Higher LBS in Berkshire	2	48660000	48780000	1.69497e-10	0.0597714	48720000	48740000	0.988343
Higher LBS in Berkshire	2	48660000	48780000	1.69497e-10	0.0597714	48760000	48780000	0.991489
Higher LBS in Berkshire	2	48660000	48780000	1.69497e-10	0.0597714	48740000	48760000	0.988752
Higher LBS in Berkshire	2	51340000	51400000	0.0207009	0.0468733	51340000	51360000	0.995663
Higher LBS in Berkshire	2	51340000	51400000	0.0207009	0.0468733	51360000	51380000	0.997954
Higher LBS in Berkshire	2	51340000	51400000	0.0207009	0.0468733	51380000	51400000	0.997387
Higher LBS in Berkshire	2	51660000	51760000	1.04035e-05	0.0710182	51660000	51680000	0.995415
Higher LBS in Berkshire	2	51660000	51760000	1.04035e-05	0.0710182	51680000	51700000	0.996154
Higher LBS in Berkshire	2	51660000	51760000	1.04035e-05	0.0710182	51700000	51720000	0.997378
Higher LBS in Berkshire	2	51660000	51760000	1.04035e-05	0.0710182	51720000	51740000	0.995785
Higher LBS in Berkshire	2	51660000	51760000	1.04035e-05	0.0710182	51740000	51760000	0.993914
Higher LBS in Berkshire	2	56020000	56260000	1.96671e-06	0.0753643	56020000	56040000	0.996203
Higher LBS in Berkshire	2	56020000	56260000	1.96671e-06	0.0753643	56040000	56060000	0.989196
Higher LBS in Berkshire	2	56020000	56260000	1.96671e-06	0.0753643	56060000	56080000	0.987835
Higher LBS in Berkshire	2	56020000	56260000	1.96671e-06	0.0753643	56100000	56120000	0.991598
Higher LBS in Berkshire	2	56020000	56260000	1.96671e-06	0.0753643	56120000	56140000	0.989974
Higher LBS in Berkshire	2	56020000	56260000	1.96671e-06	0.0753643	56140000	56160000	0.984481
Higher LBS in Berkshire	2	56020000	56260000	1.96671e-06	0.0753643	56160000	56180000	0.991283
Higher LBS in Berkshire	2	56020000	56260000	1.96671e-06	0.0753643	56180000	56200000	0.993104
Higher LBS in Berkshire	2	56020000	56260000	1.96671e-06	0.0753643	56200000	56220000	0.992754
Higher LBS in Berkshire	2	56020000	56260000	1.96671e-06	0.0753643	56240000	56260000	0.981646
Higher LBS in Berkshire	2	56020000	56260000	1.96671e-06	0.0753643	56080000	56100000	0.990101
Higher LBS in Berkshire	2	56020000	56260000	1.96671e-06	0.0753643	56220000	56240000	0.97938
Higher LBS in Berkshire	2	56560000	56620000	5.76641e-07	0.0566581	56560000	56580000	0.993828
Higher LBS in Berkshire	2	56560000	56620000	5.76641e-07	0.0566581	56580000	56600000	0.993101
Higher LBS in Berkshire	2	56560000	56620000	5.76641e-07	0.0566581	56600000	56620000	0.99583
Higher LBS in Berkshire	2	57560000	57900000	2.91621e-06	0.189465	57560000	57580000	0.997918
Higher LBS in Berkshire	2	57560000	57900000	2.91621e-06	0.189465	57580000	57600000	0.997372
Higher LBS in Berkshire	2	57560000	57900000	2.91621e-06	0.189465	57600000	57620000	0.998277
Higher LBS in Berkshire	2	57560000	57900000	2.91621e-06	0.189465	57620000	57640000	0.996026
Higher LBS in Berkshire	2	57560000	57900000	2.91621e-06	0.189465	57640000	57660000	0.998614
Higher LBS in Berkshire	2	57560000	57900000	2.91621e-06	0.189465	57680000	57700000	0.99528
Higher LBS in Berkshire	2	57560000	57900000	2.91621e-06	0.189465	57700000	57720000	0.990351
Higher LBS in Berkshire	2	57560000	57900000	2.91621e-06	0.189465	57720000	57740000	0.995542
Higher LBS in Berkshire	2	57560000	57900000	2.91621e-06	0.189465	57740000	57760000	0.997318
Higher LBS in Berkshire	2	57560000	57900000	2.91621e-06	0.189465	57760000	57780000	0.998053
Higher LBS in Berkshire	2	57560000	57900000	2.91621e-06	0.189465	57780000	57800000	0.996333
Higher LBS in Berkshire	2	57560000	57900000	2.91621e-06	0.189465	57820000	57840000	0.996705
Higher LBS in Berkshire	2	57560000	57900000	2.91621e-06	0.189465	57840000	57860000	0.996519
Higher LBS in Berkshire	2	57560000	57900000	2.91621e-06	0.189465	57860000	57880000	0.997635
Higher LBS in Berkshire	2	57560000	57900000	2.91621e-06	0.189465	57880000	57900000	0.998084
Higher LBS in Berkshire	2	57560000	57900000	2.91621e-06	0.189465	57800000	57820000	0.997895
Higher LBS in Berkshire	2	57560000	57900000	2.91621e-06	0.189465	57660000	57680000	0.999986
Higher LBS in Berkshire	2	60860000	61020000	0.0344216	0.0573557	60860000	60880000	0.994405
Higher LBS in Berkshire	2	60860000	61020000	0.0344216	0.0573557	60880000	60900000	0.995635
Higher LBS in Berkshire	2	60860000	61020000	0.0344216	0.0573557	60900000	60920000	0.992665
Higher LBS in Berkshire	2	60860000	61020000	0.0344216	0.0573557	60920000	60940000	0.996432
Higher LBS in Berkshire	2	60860000	61020000	0.0344216	0.0573557	60960000	60980000	0.997568
Higher LBS in Berkshire	2	60860000	61020000	0.0344216	0.0573557	60980000	61000000	0.998167
Higher LBS in Berkshire	2	60860000	61020000	0.0344216	0.0573557	61000000	61020000	0.997376
Higher LBS in Berkshire	2	60860000	61020000	0.0344216	0.0573557	60940000	60960000	0.995381
Higher LBS in Berkshire	2	61780000	61880000	0.0191283	0.164086	61780000	61800000	0.993461
Higher LBS in Berkshire	2	61780000	61880000	0.0191283	0.164086	61800000	61820000	0.997923
Higher LBS in Berkshire	2	61780000	61880000	0.0191283	0.164086	61820000	61840000	0.995963
Higher LBS in Berkshire	2	61780000	61880000	0.0191283	0.164086	61840000	61860000	0.99546
Higher LBS in Berkshire	2	61780000	61880000	0.0191283	0.164086	61860000	61880000	0.997793
Higher LBS in Berkshire	2	61980000	62140000	0.0448532	0.32226	62000000	62020000	0.999972
Higher LBS in Berkshire	2	61980000	62140000	0.0448532	0.32226	62020000	62040000	0.999264
Higher LBS in Berkshire	2	61980000	62140000	0.0448532	0.32226	62040000	62060000	0.997859
Higher LBS in Berkshire	2	61980000	62140000	0.0448532	0.32226	62060000	62080000	0.991676
Higher LBS in Berkshire	2	61980000	62140000	0.0448532	0.32226	62080000	62100000	0.995598
Higher LBS in Berkshire	2	61980000	62140000	0.0448532	0.32226	62100000	62120000	0.995763
Higher LBS in Berkshire	2	61980000	62140000	0.0448532	0.32226	61980000	62000000	0.999025
Higher LBS in Berkshire	2	61980000	62140000	0.0448532	0.32226	62120000	62140000	0.997634
Higher LBS in Berkshire	2	63620000	63880000	0.000171474	0.316875	63620000	63640000	0.996172
Higher LBS in Berkshire	2	63620000	63880000	0.000171474	0.316875	63640000	63660000	0.998295
Higher LBS in Berkshire	2	63620000	63880000	0.000171474	0.316875	63660000	63680000	0.996539
Higher LBS in Berkshire	2	63620000	63880000	0.000171474	0.316875	63680000	63700000	0.994186
Higher LBS in Berkshire	2	63620000	63880000	0.000171474	0.316875	63720000	63740000	0.996846
Higher LBS in Berkshire	2	63620000	63880000	0.000171474	0.316875	63740000	63760000	0.999034
Higher LBS in Berkshire	2	63620000	63880000	0.000171474	0.316875	63760000	63780000	0.999067
Higher LBS in Berkshire	2	63620000	63880000	0.000171474	0.316875	63780000	63800000	0.999272
Higher LBS in Berkshire	2	63620000	63880000	0.000171474	0.316875	63800000	63820000	0.99743
Higher LBS in Berkshire	2	63620000	63880000	0.000171474	0.316875	63840000	63860000	0.997878
Higher LBS in Berkshire	2	63620000	63880000	0.000171474	0.316875	63860000	63880000	0.998384
Higher LBS in Berkshire	2	63620000	63880000	0.000171474	0.316875	63700000	63720000	0.996143
Higher LBS in Berkshire	2	63620000	63880000	0.000171474	0.316875	63820000	63840000	0.999317
Higher LBS in Berkshire	2	64100000	64440000	0.00359336	0.179286	64100000	64120000	0.989681
Higher LBS in Berkshire	2	64100000	64440000	0.00359336	0.179286	64120000	64140000	0.996868
Higher LBS in Berkshire	2	64100000	64440000	0.00359336	0.179286	64140000	64160000	0.997312
Higher LBS in Berkshire	2	64100000	64440000	0.00359336	0.179286	64160000	64180000	0.997776
Higher LBS in Berkshire	2	64100000	64440000	0.00359336	0.179286	64180000	64200000	0.996394
Higher LBS in Berkshire	2	64100000	64440000	0.00359336	0.179286	64200000	64220000	0.995564
Higher LBS in Berkshire	2	64100000	64440000	0.00359336	0.179286	64240000	64260000	0.994709
Higher LBS in Berkshire	2	64100000	64440000	0.00359336	0.179286	64260000	64280000	0.99033
Higher LBS in Berkshire	2	64100000	64440000	0.00359336	0.179286	64280000	64300000	0.994458
Higher LBS in Berkshire	2	64100000	64440000	0.00359336	0.179286	64300000	64320000	0.994134
Higher LBS in Berkshire	2	64100000	64440000	0.00359336	0.179286	64320000	64340000	0.991323
Higher LBS in Berkshire	2	64100000	64440000	0.00359336	0.179286	64360000	64380000	0.996798
Higher LBS in Berkshire	2	64100000	64440000	0.00359336	0.179286	64380000	64400000	0.993317
Higher LBS in Berkshire	2	64100000	64440000	0.00359336	0.179286	64400000	64420000	0.996943
Higher LBS in Berkshire	2	64100000	64440000	0.00359336	0.179286	64420000	64440000	0.99811
Higher LBS in Berkshire	2	64100000	64440000	0.00359336	0.179286	64220000	64240000	0.996189
Higher LBS in Berkshire	2	64100000	64440000	0.00359336	0.179286	64340000	64360000	0.996094
Higher LBS in Berkshire	2	65520000	65580000	2.79297e-07	0.0608885	65540000	65560000	0.994848
Higher LBS in Berkshire	2	65520000	65580000	2.79297e-07	0.0608885	65560000	65580000	0.997083
Higher LBS in Berkshire	2	65520000	65580000	2.79297e-07	0.0608885	65520000	65540000	0.995503
Higher LBS in Berkshire	2	68720000	68800000	3.43654e-12	0.0991455	68720000	68740000	0.993381
Higher LBS in Berkshire	2	68720000	68800000	3.43654e-12	0.0991455	68740000	68760000	0.994402
Higher LBS in Berkshire	2	68720000	68800000	3.43654e-12	0.0991455	68760000	68780000	0.995647
Higher LBS in Berkshire	2	68720000	68800000	3.43654e-12	0.0991455	68780000	68800000	0.997809
Higher LBS in Berkshire	2	73200000	73440000	3.14971e-10	0.0978049	73200000	73220000	0.991912
Higher LBS in Berkshire	2	73200000	73440000	3.14971e-10	0.0978049	73220000	73240000	0.98436
Higher LBS in Berkshire	2	73200000	73440000	3.14971e-10	0.0978049	73240000	73260000	0.992059
Higher LBS in Berkshire	2	73200000	73440000	3.14971e-10	0.0978049	73280000	73300000	0.997818
Higher LBS in Berkshire	2	73200000	73440000	3.14971e-10	0.0978049	73300000	73320000	0.998634
Higher LBS in Berkshire	2	73200000	73440000	3.14971e-10	0.0978049	73320000	73340000	0.998234
Higher LBS in Berkshire	2	73200000	73440000	3.14971e-10	0.0978049	73340000	73360000	0.9972
Higher LBS in Berkshire	2	73200000	73440000	3.14971e-10	0.0978049	73360000	73380000	0.997461
Higher LBS in Berkshire	2	73200000	73440000	3.14971e-10	0.0978049	73380000	73400000	0.998667
Higher LBS in Berkshire	2	73200000	73440000	3.14971e-10	0.0978049	73420000	73440000	0.994599
Higher LBS in Berkshire	2	73200000	73440000	3.14971e-10	0.0978049	73260000	73280000	0.997399
Higher LBS in Berkshire	2	73200000	73440000	3.14971e-10	0.0978049	73400000	73420000	0.990552
Higher LBS in Berkshire	2	77060000	77140000	3.349e-15	0.0440326	77080000	77100000	0.99771
Higher LBS in Berkshire	2	77060000	77140000	3.349e-15	0.0440326	77100000	77120000	0.997076
Higher LBS in Berkshire	2	77060000	77140000	3.349e-15	0.0440326	77120000	77140000	0.996085
Higher LBS in Berkshire	2	77060000	77140000	3.349e-15	0.0440326	77060000	77080000	0.996634
Higher LBS in Berkshire	2	85300000	85380000	2.33394e-16	0.0342275	85300000	85320000	0.986986
Higher LBS in Berkshire	2	85300000	85380000	2.33394e-16	0.0342275	85340000	85360000	0.983676
Higher LBS in Berkshire	2	85300000	85380000	2.33394e-16	0.0342275	85360000	85380000	0.990395
Higher LBS in Berkshire	2	85300000	85380000	2.33394e-16	0.0342275	85320000	85340000	0.988681
Higher LBS in Berkshire	2	86240000	86340000	6.36053e-07	0.0455042	86260000	86280000	0.994348
Higher LBS in Berkshire	2	86240000	86340000	6.36053e-07	0.0455042	86280000	86300000	0.993854
Higher LBS in Berkshire	2	86240000	86340000	6.36053e-07	0.0455042	86300000	86320000	0.995742
Higher LBS in Berkshire	2	86240000	86340000	6.36053e-07	0.0455042	86320000	86340000	0.997063
Higher LBS in Berkshire	2	86240000	86340000	6.36053e-07	0.0455042	86240000	86260000	0.996036
Higher LBS in Berkshire	2	86640000	86700000	2.41149e-24	0.0448662	86640000	86660000	0.997055
Higher LBS in Berkshire	2	86640000	86700000	2.41149e-24	0.0448662	86660000	86680000	0.995552
Higher LBS in Berkshire	2	86640000	86700000	2.41149e-24	0.0448662	86680000	86700000	0.99389
Higher LBS in Berkshire	2	88400000	88460000	3.72069e-07	0.0350327	88400000	88420000	0.997213
Higher LBS in Berkshire	2	88400000	88460000	3.72069e-07	0.0350327	88420000	88440000	0.993711
Higher LBS in Berkshire	2	88400000	88460000	3.72069e-07	0.0350327	88440000	88460000	0.996181
Higher LBS in Berkshire	2	90100000	90260000	2.03039e-12	0.0621357	90100000	90120000	0.993876
Higher LBS in Berkshire	2	90100000	90260000	2.03039e-12	0.0621357	90120000	90140000	0.997701
Higher LBS in Berkshire	2	90100000	90260000	2.03039e-12	0.0621357	90140000	90160000	0.992475
Higher LBS in Berkshire	2	90100000	90260000	2.03039e-12	0.0621357	90180000	90200000	0.993384
Higher LBS in Berkshire	2	90100000	90260000	2.03039e-12	0.0621357	90200000	90220000	0.993405
Higher LBS in Berkshire	2	90100000	90260000	2.03039e-12	0.0621357	90220000	90240000	0.996196
Higher LBS in Berkshire	2	90100000	90260000	2.03039e-12	0.0621357	90240000	90260000	0.994515
Higher LBS in Berkshire	2	90100000	90260000	2.03039e-12	0.0621357	90160000	90180000	0.995471
Higher LBS in Berkshire	2	92800000	92900000	1.94838e-05	0.079983	92800000	92820000	0.995765
Higher LBS in Berkshire	2	92800000	92900000	1.94838e-05	0.079983	92820000	92840000	0.994808
Higher LBS in Berkshire	2	92800000	92900000	1.94838e-05	0.079983	92840000	92860000	0.988303
Higher LBS in Berkshire	2	92800000	92900000	1.94838e-05	0.079983	92860000	92880000	0.983175
Higher LBS in Berkshire	2	92800000	92900000	1.94838e-05	0.079983	92880000	92900000	0.993072
Higher LBS in Berkshire	2	94320000	94440000	1.36223e-09	0.0696088	94320000	94340000	0.994841
Higher LBS in Berkshire	2	94320000	94440000	1.36223e-09	0.0696088	94340000	94360000	0.991804
Higher LBS in Berkshire	2	94320000	94440000	1.36223e-09	0.0696088	94380000	94400000	0.996245
Higher LBS in Berkshire	2	94320000	94440000	1.36223e-09	0.0696088	94400000	94420000	0.994586
Higher LBS in Berkshire	2	94320000	94440000	1.36223e-09	0.0696088	94420000	94440000	0.997296
Higher LBS in Berkshire	2	94320000	94440000	1.36223e-09	0.0696088	94360000	94380000	0.99517
Higher LBS in Berkshire	2	97380000	97500000	1.17697e-05	0.0553499	97400000	97420000	0.995425
Higher LBS in Berkshire	2	97380000	97500000	1.17697e-05	0.0553499	97420000	97440000	0.996097
Higher LBS in Berkshire	2	97380000	97500000	1.17697e-05	0.0553499	97440000	97460000	0.996792
Higher LBS in Berkshire	2	97380000	97500000	1.17697e-05	0.0553499	97460000	97480000	0.996004
Higher LBS in Berkshire	2	97380000	97500000	1.17697e-05	0.0553499	97480000	97500000	0.995354
Higher LBS in Berkshire	2	97380000	97500000	1.17697e-05	0.0553499	97380000	97400000	0.996406
Higher LBS in Berkshire	2	102220000	102340000	7.5484e-11	0.058397	102240000	102260000	0.990094
Higher LBS in Berkshire	2	102220000	102340000	7.5484e-11	0.058397	102260000	102280000	0.993261
Higher LBS in Berkshire	2	102220000	102340000	7.5484e-11	0.058397	102280000	102300000	0.989913
Higher LBS in Berkshire	2	102220000	102340000	7.5484e-11	0.058397	102300000	102320000	0.98882
Higher LBS in Berkshire	2	102220000	102340000	7.5484e-11	0.058397	102320000	102340000	0.99238
Higher LBS in Berkshire	2	102220000	102340000	7.5484e-11	0.058397	102220000	102240000	0.991776
Higher LBS in Berkshire	2	106500000	106560000	4.44967e-07	0.0491368	106500000	106520000	0.994147
Higher LBS in Berkshire	2	106500000	106560000	4.44967e-07	0.0491368	106520000	106540000	0.994021
Higher LBS in Berkshire	2	106500000	106560000	4.44967e-07	0.0491368	106540000	106560000	0.994762
Higher LBS in Berkshire	2	107600000	107800000	0.000168264	0.059923	107620000	107640000	0.990289
Higher LBS in Berkshire	2	107600000	107800000	0.000168264	0.059923	107640000	107660000	0.991136
Higher LBS in Berkshire	2	107600000	107800000	0.000168264	0.059923	107660000	107680000	0.990028
Higher LBS in Berkshire	2	107600000	107800000	0.000168264	0.059923	107680000	107700000	0.991469
Higher LBS in Berkshire	2	107600000	107800000	0.000168264	0.059923	107700000	107720000	0.987807
Higher LBS in Berkshire	2	107600000	107800000	0.000168264	0.059923	107720000	107740000	0.98845
Higher LBS in Berkshire	2	107600000	107800000	0.000168264	0.059923	107760000	107780000	0.993708
Higher LBS in Berkshire	2	107600000	107800000	0.000168264	0.059923	107780000	107800000	0.993134
Higher LBS in Berkshire	2	107600000	107800000	0.000168264	0.059923	107600000	107620000	0.988909
Higher LBS in Berkshire	2	107600000	107800000	0.000168264	0.059923	107740000	107760000	0.995429
Higher LBS in Berkshire	2	113360000	113460000	3.8712e-13	0.057165	113380000	113400000	0.997121
Higher LBS in Berkshire	2	113360000	113460000	3.8712e-13	0.057165	113400000	113420000	0.99198
Higher LBS in Berkshire	2	113360000	113460000	3.8712e-13	0.057165	113420000	113440000	0.993889
Higher LBS in Berkshire	2	113360000	113460000	3.8712e-13	0.057165	113440000	113460000	0.996351
Higher LBS in Berkshire	2	113360000	113460000	3.8712e-13	0.057165	113360000	113380000	0.997938
Higher LBS in Berkshire	2	114160000	114260000	3.57871e-10	0.055404	114180000	114200000	0.99342
Higher LBS in Berkshire	2	114160000	114260000	3.57871e-10	0.055404	114200000	114220000	0.992995
Higher LBS in Berkshire	2	114160000	114260000	3.57871e-10	0.055404	114220000	114240000	0.992986
Higher LBS in Berkshire	2	114160000	114260000	3.57871e-10	0.055404	114240000	114260000	0.992299
Higher LBS in Berkshire	2	114160000	114260000	3.57871e-10	0.055404	114160000	114180000	0.995996
Higher LBS in Berkshire	2	116620000	116740000	8.47371e-05	0.0943371	116620000	116640000	0.987053
Higher LBS in Berkshire	2	116620000	116740000	8.47371e-05	0.0943371	116660000	116680000	0.980442
Higher LBS in Berkshire	2	116620000	116740000	8.47371e-05	0.0943371	116680000	116700000	0.99073
Higher LBS in Berkshire	2	116620000	116740000	8.47371e-05	0.0943371	116700000	116720000	0.987842
Higher LBS in Berkshire	2	116620000	116740000	8.47371e-05	0.0943371	116720000	116740000	0.994177
Higher LBS in Berkshire	2	116620000	116740000	8.47371e-05	0.0943371	116640000	116660000	0.989223
Higher LBS in Berkshire	2	117320000	117620000	3.7897e-42	0.0342419	117320000	117340000	0.992673
Higher LBS in Berkshire	2	117320000	117620000	3.7897e-42	0.0342419	117340000	117360000	0.994297
Higher LBS in Berkshire	2	117320000	117620000	3.7897e-42	0.0342419	117360000	117380000	0.996123
Higher LBS in Berkshire	2	117320000	117620000	3.7897e-42	0.0342419	117380000	117400000	0.996436
Higher LBS in Berkshire	2	117320000	117620000	3.7897e-42	0.0342419	117400000	117420000	0.995248
Higher LBS in Berkshire	2	117320000	117620000	3.7897e-42	0.0342419	117420000	117440000	0.991258
Higher LBS in Berkshire	2	117320000	117620000	3.7897e-42	0.0342419	117460000	117480000	0.98147
Higher LBS in Berkshire	2	117320000	117620000	3.7897e-42	0.0342419	117480000	117500000	0.991209
Higher LBS in Berkshire	2	117320000	117620000	3.7897e-42	0.0342419	117500000	117520000	0.987678
Higher LBS in Berkshire	2	117320000	117620000	3.7897e-42	0.0342419	117520000	117540000	0.99487
Higher LBS in Berkshire	2	117320000	117620000	3.7897e-42	0.0342419	117540000	117560000	0.99423
Higher LBS in Berkshire	2	117320000	117620000	3.7897e-42	0.0342419	117580000	117600000	0.987349
Higher LBS in Berkshire	2	117320000	117620000	3.7897e-42	0.0342419	117600000	117620000	0.984689
Higher LBS in Berkshire	2	117320000	117620000	3.7897e-42	0.0342419	117560000	117580000	0.989073
Higher LBS in Berkshire	2	117320000	117620000	3.7897e-42	0.0342419	117440000	117460000	0.996257
Higher LBS in Berkshire	2	119180000	119320000	2.08352e-34	0.0599225	119180000	119200000	0.990587
Higher LBS in Berkshire	2	119180000	119320000	2.08352e-34	0.0599225	119200000	119220000	0.989678
Higher LBS in Berkshire	2	119180000	119320000	2.08352e-34	0.0599225	119220000	119240000	0.991481
Higher LBS in Berkshire	2	119180000	119320000	2.08352e-34	0.0599225	119240000	119260000	0.991209
Higher LBS in Berkshire	2	119180000	119320000	2.08352e-34	0.0599225	119280000	119300000	0.990011
Higher LBS in Berkshire	2	119180000	119320000	2.08352e-34	0.0599225	119300000	119320000	0.9852
Higher LBS in Berkshire	2	119180000	119320000	2.08352e-34	0.0599225	119260000	119280000	0.987846
Higher LBS in Berkshire	2	124700000	124820000	8.60755e-09	0.0695948	124700000	124720000	0.988572
Higher LBS in Berkshire	2	124700000	124820000	8.60755e-09	0.0695948	124720000	124740000	0.991916
Higher LBS in Berkshire	2	124700000	124820000	8.60755e-09	0.0695948	124740000	124760000	0.984711
Higher LBS in Berkshire	2	124700000	124820000	8.60755e-09	0.0695948	124760000	124780000	0.986295
Higher LBS in Berkshire	2	124700000	124820000	8.60755e-09	0.0695948	124800000	124820000	0.989572
Higher LBS in Berkshire	2	124700000	124820000	8.60755e-09	0.0695948	124780000	124800000	0.986889
Higher LBS in Berkshire	2	127720000	127800000	4.64357e-19	0.037785	127720000	127740000	0.990134
Higher LBS in Berkshire	2	127720000	127800000	4.64357e-19	0.037785	127740000	127760000	0.986756
Higher LBS in Berkshire	2	127720000	127800000	4.64357e-19	0.037785	127760000	127780000	0.988484
Higher LBS in Berkshire	2	127720000	127800000	4.64357e-19	0.037785	127780000	127800000	0.988375
Higher LBS in Berkshire	2	131100000	131180000	8.01105e-130	0.052355	131100000	131120000	0.98829
Higher LBS in Berkshire	2	131100000	131180000	8.01105e-130	0.052355	131120000	131140000	0.987922
Higher LBS in Berkshire	2	131100000	131180000	8.01105e-130	0.052355	131140000	131160000	0.992177
Higher LBS in Berkshire	2	131100000	131180000	8.01105e-130	0.052355	131160000	131180000	0.990694
Higher LBS in Berkshire	2	131880000	132460000	1.12392e-08	0.202236	131880000	131900000	0.986664
Higher LBS in Berkshire	2	131880000	132460000	1.12392e-08	0.202236	131900000	131920000	0.982643
Higher LBS in Berkshire	2	131880000	132460000	1.12392e-08	0.202236	131920000	131940000	0.986612
Higher LBS in Berkshire	2	131880000	132460000	1.12392e-08	0.202236	131940000	131960000	0.990364
Higher LBS in Berkshire	2	131880000	132460000	1.12392e-08	0.202236	131960000	131980000	0.988509
Higher LBS in Berkshire	2	131880000	132460000	1.12392e-08	0.202236	132000000	132020000	0.98853
Higher LBS in Berkshire	2	131880000	132460000	1.12392e-08	0.202236	132020000	132040000	0.986526
Higher LBS in Berkshire	2	131880000	132460000	1.12392e-08	0.202236	132040000	132060000	0.985472
Higher LBS in Berkshire	2	131880000	132460000	1.12392e-08	0.202236	132060000	132080000	0.990259
Higher LBS in Berkshire	2	131880000	132460000	1.12392e-08	0.202236	132080000	132100000	0.988161
Higher LBS in Berkshire	2	131880000	132460000	1.12392e-08	0.202236	132100000	132120000	0.991728
Higher LBS in Berkshire	2	131880000	132460000	1.12392e-08	0.202236	132140000	132160000	0.98965
Higher LBS in Berkshire	2	131880000	132460000	1.12392e-08	0.202236	132160000	132180000	0.983616
Higher LBS in Berkshire	2	131880000	132460000	1.12392e-08	0.202236	132180000	132200000	0.98836
Higher LBS in Berkshire	2	131880000	132460000	1.12392e-08	0.202236	132200000	132220000	0.994416
Higher LBS in Berkshire	2	131880000	132460000	1.12392e-08	0.202236	132220000	132240000	0.989699
Higher LBS in Berkshire	2	131880000	132460000	1.12392e-08	0.202236	132260000	132280000	0.987412
Higher LBS in Berkshire	2	131880000	132460000	1.12392e-08	0.202236	132280000	132300000	0.983784
Higher LBS in Berkshire	2	131880000	132460000	1.12392e-08	0.202236	132300000	132320000	0.988884
Higher LBS in Berkshire	2	131880000	132460000	1.12392e-08	0.202236	132320000	132340000	0.988093
Higher LBS in Berkshire	2	131880000	132460000	1.12392e-08	0.202236	132340000	132360000	0.988655
Higher LBS in Berkshire	2	131880000	132460000	1.12392e-08	0.202236	132360000	132380000	0.986424
Higher LBS in Berkshire	2	131880000	132460000	1.12392e-08	0.202236	132400000	132420000	0.986086
Higher LBS in Berkshire	2	131880000	132460000	1.12392e-08	0.202236	132420000	132440000	0.987079
Higher LBS in Berkshire	2	131880000	132460000	1.12392e-08	0.202236	132440000	132460000	0.988343
Higher LBS in Berkshire	2	131880000	132460000	1.12392e-08	0.202236	131980000	132000000	0.98872
Higher LBS in Berkshire	2	131880000	132460000	1.12392e-08	0.202236	132240000	132260000	0.987221
Higher LBS in Berkshire	2	131880000	132460000	1.12392e-08	0.202236	132380000	132400000	0.990363
Higher LBS in Berkshire	2	131880000	132460000	1.12392e-08	0.202236	132120000	132140000	0.991605
Higher LBS in Berkshire	2	136300000	136380000	5.36581e-21	0.0476668	136320000	136340000	0.987021
Higher LBS in Berkshire	2	136300000	136380000	5.36581e-21	0.0476668	136340000	136360000	0.984184
Higher LBS in Berkshire	2	136300000	136380000	5.36581e-21	0.0476668	136360000	136380000	0.985137
Higher LBS in Berkshire	2	136300000	136380000	5.36581e-21	0.0476668	136300000	136320000	0.989291
Higher LBS in Berkshire	2	139060000	139220000	4.06103e-07	0.0683767	139080000	139100000	0.98378
Higher LBS in Berkshire	2	139060000	139220000	4.06103e-07	0.0683767	139100000	139120000	0.986033
Higher LBS in Berkshire	2	139060000	139220000	4.06103e-07	0.0683767	139120000	139140000	0.986765
Higher LBS in Berkshire	2	139060000	139220000	4.06103e-07	0.0683767	139140000	139160000	0.984742
Higher LBS in Berkshire	2	139060000	139220000	4.06103e-07	0.0683767	139160000	139180000	0.984996
Higher LBS in Berkshire	2	139060000	139220000	4.06103e-07	0.0683767	139200000	139220000	0.984611
Higher LBS in Berkshire	2	139060000	139220000	4.06103e-07	0.0683767	139060000	139080000	0.98007
Higher LBS in Berkshire	2	139060000	139220000	4.06103e-07	0.0683767	139180000	139200000	0.987352
Higher LBS in Berkshire	2	140620000	140740000	8.20919e-15	0.0413075	140620000	140640000	0.992349
Higher LBS in Berkshire	2	140620000	140740000	8.20919e-15	0.0413075	140660000	140680000	0.989025
Higher LBS in Berkshire	2	140620000	140740000	8.20919e-15	0.0413075	140680000	140700000	0.990377
Higher LBS in Berkshire	2	140620000	140740000	8.20919e-15	0.0413075	140700000	140720000	0.99265
Higher LBS in Berkshire	2	140620000	140740000	8.20919e-15	0.0413075	140720000	140740000	0.99201
Higher LBS in Berkshire	2	140620000	140740000	8.20919e-15	0.0413075	140640000	140660000	0.988855
Higher LBS in Berkshire	2	142440000	142540000	7.60695e-21	0.0770057	142440000	142460000	0.988564
Higher LBS in Berkshire	2	142440000	142540000	7.60695e-21	0.0770057	142480000	142500000	0.992611
Higher LBS in Berkshire	2	142440000	142540000	7.60695e-21	0.0770057	142500000	142520000	0.989888
Higher LBS in Berkshire	2	142440000	142540000	7.60695e-21	0.0770057	142520000	142540000	0.991396
Higher LBS in Berkshire	2	142440000	142540000	7.60695e-21	0.0770057	142460000	142480000	0.988754
Higher LBS in Berkshire	2	144820000	144880000	3.15548e-39	0.0255792	144840000	144860000	0.993517
Higher LBS in Berkshire	2	144820000	144880000	3.15548e-39	0.0255792	144860000	144880000	0.994243
Higher LBS in Berkshire	2	144820000	144880000	3.15548e-39	0.0255792	144820000	144840000	0.990776
Higher LBS in Berkshire	2	150880000	150960000	0.000959696	0.0506013	150880000	150900000	0.99354
Higher LBS in Berkshire	2	150880000	150960000	0.000959696	0.0506013	150900000	150920000	0.994542
Higher LBS in Berkshire	2	150880000	150960000	0.000959696	0.0506013	150920000	150940000	0.984553
Higher LBS in Berkshire	2	150880000	150960000	0.000959696	0.0506013	150940000	150960000	0.987317
Higher LBS in Berkshire	3	460000	580000	0.000749895	0.0971578	460000	480000	0.988798
Higher LBS in Berkshire	3	460000	580000	0.000749895	0.0971578	480000	500000	0.994797
Higher LBS in Berkshire	3	460000	580000	0.000749895	0.0971578	500000	520000	0.997218
Higher LBS in Berkshire	3	460000	580000	0.000749895	0.0971578	540000	560000	0.992971
Higher LBS in Berkshire	3	460000	580000	0.000749895	0.0971578	560000	580000	0.986766
Higher LBS in Berkshire	3	460000	580000	0.000749895	0.0971578	520000	540000	0.993899
Higher LBS in Berkshire	3	1020000	1120000	3.65298e-06	0.0963875	1020000	1040000	0.995641
Higher LBS in Berkshire	3	1020000	1120000	3.65298e-06	0.0963875	1060000	1080000	0.986044
Higher LBS in Berkshire	3	1020000	1120000	3.65298e-06	0.0963875	1080000	1100000	0.987206
Higher LBS in Berkshire	3	1020000	1120000	3.65298e-06	0.0963875	1100000	1120000	0.990645
Higher LBS in Berkshire	3	1020000	1120000	3.65298e-06	0.0963875	1040000	1060000	0.987901
Higher LBS in Berkshire	3	3720000	3820000	1.16987e-08	0.0430153	3720000	3740000	0.988271
Higher LBS in Berkshire	3	3720000	3820000	1.16987e-08	0.0430153	3740000	3760000	0.983997
Higher LBS in Berkshire	3	3720000	3820000	1.16987e-08	0.0430153	3760000	3780000	0.983927
Higher LBS in Berkshire	3	3720000	3820000	1.16987e-08	0.0430153	3780000	3800000	0.975016
Higher LBS in Berkshire	3	3720000	3820000	1.16987e-08	0.0430153	3800000	3820000	0.985711
Higher LBS in Berkshire	3	4360000	4440000	5.51027e-06	0.0725283	4360000	4380000	0.991904
Higher LBS in Berkshire	3	4360000	4440000	5.51027e-06	0.0725283	4380000	4400000	0.994759
Higher LBS in Berkshire	3	4360000	4440000	5.51027e-06	0.0725283	4400000	4420000	0.984306
Higher LBS in Berkshire	3	4360000	4440000	5.51027e-06	0.0725283	4420000	4440000	0.985754
Higher LBS in Berkshire	3	5320000	5380000	3.38038e-07	0.0384875	5320000	5340000	0.991804
Higher LBS in Berkshire	3	5320000	5380000	3.38038e-07	0.0384875	5340000	5360000	0.990834
Higher LBS in Berkshire	3	5320000	5380000	3.38038e-07	0.0384875	5360000	5380000	0.986043
Higher LBS in Berkshire	3	6020000	6080000	0.00377217	0.0623532	6040000	6060000	0.980294
Higher LBS in Berkshire	3	6020000	6080000	0.00377217	0.0623532	6060000	6080000	0.981271
Higher LBS in Berkshire	3	6020000	6080000	0.00377217	0.0623532	6020000	6040000	0.985152
Higher LBS in Berkshire	3	10720000	10780000	1.91805e-14	0.0263956	10720000	10740000	0.996683
Higher LBS in Berkshire	3	10720000	10780000	1.91805e-14	0.0263956	10760000	10780000	0.995923
Higher LBS in Berkshire	3	10720000	10780000	1.91805e-14	0.0263956	10740000	10760000	0.997868
Higher LBS in Berkshire	3	13980000	14040000	1.04688e-08	0.0764753	13980000	14000000	0.998287
Higher LBS in Berkshire	3	13980000	14040000	1.04688e-08	0.0764753	14000000	14020000	0.997481
Higher LBS in Berkshire	3	13980000	14040000	1.04688e-08	0.0764753	14020000	14040000	0.989358
Higher LBS in Berkshire	3	15360000	15460000	0.000196462	0.133053	15360000	15380000	0.982467
Higher LBS in Berkshire	3	15360000	15460000	0.000196462	0.133053	15380000	15400000	0.982461
Higher LBS in Berkshire	3	15360000	15460000	0.000196462	0.133053	15400000	15420000	0.984254
Higher LBS in Berkshire	3	15360000	15460000	0.000196462	0.133053	15420000	15440000	0.978961
Higher LBS in Berkshire	3	15360000	15460000	0.000196462	0.133053	15440000	15460000	0.977118
Higher LBS in Berkshire	3	16200000	16360000	2.79083e-37	0.0428132	16200000	16220000	0.983581
Higher LBS in Berkshire	3	16200000	16360000	2.79083e-37	0.0428132	16220000	16240000	0.98223
Higher LBS in Berkshire	3	16200000	16360000	2.79083e-37	0.0428132	16260000	16280000	0.987471
Higher LBS in Berkshire	3	16200000	16360000	2.79083e-37	0.0428132	16280000	16300000	0.983628
Higher LBS in Berkshire	3	16200000	16360000	2.79083e-37	0.0428132	16300000	16320000	0.989752
Higher LBS in Berkshire	3	16200000	16360000	2.79083e-37	0.0428132	16320000	16340000	0.994581
Higher LBS in Berkshire	3	16200000	16360000	2.79083e-37	0.0428132	16340000	16360000	0.989134
Higher LBS in Berkshire	3	16200000	16360000	2.79083e-37	0.0428132	16240000	16260000	0.984473
Higher LBS in Berkshire	3	17240000	17340000	1.36366e-06	0.0621277	17240000	17260000	0.994167
Higher LBS in Berkshire	3	17240000	17340000	1.36366e-06	0.0621277	17260000	17280000	0.992524
Higher LBS in Berkshire	3	17240000	17340000	1.36366e-06	0.0621277	17280000	17300000	0.985901
Higher LBS in Berkshire	3	17240000	17340000	1.36366e-06	0.0621277	17320000	17340000	0.991489
Higher LBS in Berkshire	3	17240000	17340000	1.36366e-06	0.0621277	17300000	17320000	0.995015
Higher LBS in Berkshire	3	19140000	19560000	2.90069e-08	0.0901019	19140000	19160000	0.979641
Higher LBS in Berkshire	3	19140000	19560000	2.90069e-08	0.0901019	19160000	19180000	0.994115
Higher LBS in Berkshire	3	19140000	19560000	2.90069e-08	0.0901019	19180000	19200000	0.999986
Higher LBS in Berkshire	3	19140000	19560000	2.90069e-08	0.0901019	19200000	19220000	0.999583
Higher LBS in Berkshire	3	19140000	19560000	2.90069e-08	0.0901019	19220000	19240000	0.988646
Higher LBS in Berkshire	3	19140000	19560000	2.90069e-08	0.0901019	19240000	19260000	0.9816
Higher LBS in Berkshire	3	19140000	19560000	2.90069e-08	0.0901019	19280000	19300000	0.984813
Higher LBS in Berkshire	3	19140000	19560000	2.90069e-08	0.0901019	19300000	19320000	0.986852
Higher LBS in Berkshire	3	19140000	19560000	2.90069e-08	0.0901019	19320000	19340000	0.985434
Higher LBS in Berkshire	3	19140000	19560000	2.90069e-08	0.0901019	19340000	19360000	0.981163
Higher LBS in Berkshire	3	19140000	19560000	2.90069e-08	0.0901019	19360000	19380000	0.979392
Higher LBS in Berkshire	3	19140000	19560000	2.90069e-08	0.0901019	19400000	19420000	0.973745
Higher LBS in Berkshire	3	19140000	19560000	2.90069e-08	0.0901019	19420000	19440000	0.973491
Higher LBS in Berkshire	3	19140000	19560000	2.90069e-08	0.0901019	19440000	19460000	0.985318
Higher LBS in Berkshire	3	19140000	19560000	2.90069e-08	0.0901019	19460000	19480000	0.984407
Higher LBS in Berkshire	3	19140000	19560000	2.90069e-08	0.0901019	19480000	19500000	0.988132
Higher LBS in Berkshire	3	19140000	19560000	2.90069e-08	0.0901019	19500000	19520000	0.984498
Higher LBS in Berkshire	3	19140000	19560000	2.90069e-08	0.0901019	19540000	19560000	0.991978
Higher LBS in Berkshire	3	19140000	19560000	2.90069e-08	0.0901019	19260000	19280000	0.986938
Higher LBS in Berkshire	3	19140000	19560000	2.90069e-08	0.0901019	19380000	19400000	0.984397
Higher LBS in Berkshire	3	19140000	19560000	2.90069e-08	0.0901019	19520000	19540000	0.990617
Higher LBS in Berkshire	3	21720000	21800000	2.13836e-09	0.172534	21720000	21740000	0.995772
Higher LBS in Berkshire	3	21720000	21800000	2.13836e-09	0.172534	21760000	21780000	0.988524
Higher LBS in Berkshire	3	21720000	21800000	2.13836e-09	0.172534	21780000	21800000	0.991555
Higher LBS in Berkshire	3	21720000	21800000	2.13836e-09	0.172534	21740000	21760000	0.990533
Higher LBS in Berkshire	3	22800000	22940000	1.68758e-08	0.0508228	22820000	22840000	0.992925
Higher LBS in Berkshire	3	22800000	22940000	1.68758e-08	0.0508228	22840000	22860000	0.991555
Higher LBS in Berkshire	3	22800000	22940000	1.68758e-08	0.0508228	22860000	22880000	0.994837
Higher LBS in Berkshire	3	22800000	22940000	1.68758e-08	0.0508228	22880000	22900000	0.989051
Higher LBS in Berkshire	3	22800000	22940000	1.68758e-08	0.0508228	22900000	22920000	0.986209
Higher LBS in Berkshire	3	22800000	22940000	1.68758e-08	0.0508228	22800000	22820000	0.993416
Higher LBS in Berkshire	3	22800000	22940000	1.68758e-08	0.0508228	22920000	22940000	0.984481
Higher LBS in Berkshire	3	23180000	23260000	3.18563e-50	0.0394924	23200000	23220000	0.988197
Higher LBS in Berkshire	3	23180000	23260000	3.18563e-50	0.0394924	23220000	23240000	0.988938
Higher LBS in Berkshire	3	23180000	23260000	3.18563e-50	0.0394924	23240000	23260000	0.992071
Higher LBS in Berkshire	3	23180000	23260000	3.18563e-50	0.0394924	23180000	23200000	0.990421
Higher LBS in Berkshire	3	24400000	24600000	0.0135078	0.0511003	24400000	24420000	0.995648
Higher LBS in Berkshire	3	24400000	24600000	0.0135078	0.0511003	24420000	24440000	0.994889
Higher LBS in Berkshire	3	24400000	24600000	0.0135078	0.0511003	24440000	24460000	0.994241
Higher LBS in Berkshire	3	24400000	24600000	0.0135078	0.0511003	24460000	24480000	0.986365
Higher LBS in Berkshire	3	24400000	24600000	0.0135078	0.0511003	24480000	24500000	0.985601
Higher LBS in Berkshire	3	24400000	24600000	0.0135078	0.0511003	24520000	24540000	0.988557
Higher LBS in Berkshire	3	24400000	24600000	0.0135078	0.0511003	24540000	24560000	0.997277
Higher LBS in Berkshire	3	24400000	24600000	0.0135078	0.0511003	24560000	24580000	0.9951
Higher LBS in Berkshire	3	24400000	24600000	0.0135078	0.0511003	24580000	24600000	0.99413
Higher LBS in Berkshire	3	24400000	24600000	0.0135078	0.0511003	24500000	24520000	0.993816
Higher LBS in Berkshire	3	28660000	28720000	4.81279e-10	0.042806	28660000	28680000	0.994499
Higher LBS in Berkshire	3	28660000	28720000	4.81279e-10	0.042806	28680000	28700000	0.995397
Higher LBS in Berkshire	3	28660000	28720000	4.81279e-10	0.042806	28700000	28720000	0.995183
Higher LBS in Berkshire	3	29240000	29360000	1.5327e-08	0.0732011	29240000	29260000	0.991619
Higher LBS in Berkshire	3	29240000	29360000	1.5327e-08	0.0732011	29260000	29280000	0.996944
Higher LBS in Berkshire	3	29240000	29360000	1.5327e-08	0.0732011	29280000	29300000	0.996462
Higher LBS in Berkshire	3	29240000	29360000	1.5327e-08	0.0732011	29300000	29320000	0.996135
Higher LBS in Berkshire	3	29240000	29360000	1.5327e-08	0.0732011	29320000	29340000	0.988528
Higher LBS in Berkshire	3	29240000	29360000	1.5327e-08	0.0732011	29340000	29360000	0.989423
Higher LBS in Berkshire	3	30480000	30540000	5.62457e-16	0.0358797	30480000	30500000	0.995414
Higher LBS in Berkshire	3	30480000	30540000	5.62457e-16	0.0358797	30500000	30520000	0.978536
Higher LBS in Berkshire	3	30480000	30540000	5.62457e-16	0.0358797	30520000	30540000	0.987939
Higher LBS in Berkshire	3	32200000	32260000	1.68041e-11	0.0424468	32200000	32220000	0.997278
Higher LBS in Berkshire	3	32200000	32260000	1.68041e-11	0.0424468	32220000	32240000	0.997062
Higher LBS in Berkshire	3	32200000	32260000	1.68041e-11	0.0424468	32240000	32260000	0.996814
Higher LBS in Berkshire	3	33640000	33720000	4.64655e-19	0.0345395	33640000	33660000	0.992843
Higher LBS in Berkshire	3	33640000	33720000	4.64655e-19	0.0345395	33660000	33680000	0.998881
Higher LBS in Berkshire	3	33640000	33720000	4.64655e-19	0.0345395	33700000	33720000	0.995553
Higher LBS in Berkshire	3	33640000	33720000	4.64655e-19	0.0345395	33680000	33700000	0.99765
Higher LBS in Berkshire	3	37380000	37540000	1.01696e-16	0.0804534	37380000	37400000	0.997134
Higher LBS in Berkshire	3	37380000	37540000	1.01696e-16	0.0804534	37400000	37420000	0.996549
Higher LBS in Berkshire	3	37380000	37540000	1.01696e-16	0.0804534	37420000	37440000	0.993889
Higher LBS in Berkshire	3	37380000	37540000	1.01696e-16	0.0804534	37440000	37460000	0.994263
Higher LBS in Berkshire	3	37380000	37540000	1.01696e-16	0.0804534	37460000	37480000	0.995512
Higher LBS in Berkshire	3	37380000	37540000	1.01696e-16	0.0804534	37500000	37520000	0.998506
Higher LBS in Berkshire	3	37380000	37540000	1.01696e-16	0.0804534	37520000	37540000	0.998112
Higher LBS in Berkshire	3	37380000	37540000	1.01696e-16	0.0804534	37480000	37500000	0.995938
Higher LBS in Berkshire	3	41880000	42140000	0.00177962	0.107108	41880000	41900000	0.996585
Higher LBS in Berkshire	3	41880000	42140000	0.00177962	0.107108	41900000	41920000	0.9977
Higher LBS in Berkshire	3	41880000	42140000	0.00177962	0.107108	41920000	41940000	0.994983
Higher LBS in Berkshire	3	41880000	42140000	0.00177962	0.107108	41960000	41980000	0.994925
Higher LBS in Berkshire	3	41880000	42140000	0.00177962	0.107108	41980000	42000000	0.997359
Higher LBS in Berkshire	3	41880000	42140000	0.00177962	0.107108	42000000	42020000	0.994749
Higher LBS in Berkshire	3	41880000	42140000	0.00177962	0.107108	42020000	42040000	0.99507
Higher LBS in Berkshire	3	41880000	42140000	0.00177962	0.107108	42040000	42060000	0.99817
Higher LBS in Berkshire	3	41880000	42140000	0.00177962	0.107108	42080000	42100000	0.994902
Higher LBS in Berkshire	3	41880000	42140000	0.00177962	0.107108	42100000	42120000	0.997042
Higher LBS in Berkshire	3	41880000	42140000	0.00177962	0.107108	42120000	42140000	0.997492
Higher LBS in Berkshire	3	41880000	42140000	0.00177962	0.107108	42060000	42080000	0.996727
Higher LBS in Berkshire	3	41880000	42140000	0.00177962	0.107108	41940000	41960000	0.996283
Higher LBS in Berkshire	3	46760000	46840000	6.56609e-07	0.0305257	46760000	46780000	0.990112
Higher LBS in Berkshire	3	46760000	46840000	6.56609e-07	0.0305257	46800000	46820000	0.989686
Higher LBS in Berkshire	3	46760000	46840000	6.56609e-07	0.0305257	46820000	46840000	0.994801
Higher LBS in Berkshire	3	46760000	46840000	6.56609e-07	0.0305257	46780000	46800000	0.986964
Higher LBS in Berkshire	3	51320000	51460000	1.85462e-16	0.0796667	51320000	51340000	0.992998
Higher LBS in Berkshire	3	51320000	51460000	1.85462e-16	0.0796667	51340000	51360000	0.9932
Higher LBS in Berkshire	3	51320000	51460000	1.85462e-16	0.0796667	51360000	51380000	0.996113
Higher LBS in Berkshire	3	51320000	51460000	1.85462e-16	0.0796667	51400000	51420000	0.992349
Higher LBS in Berkshire	3	51320000	51460000	1.85462e-16	0.0796667	51420000	51440000	0.996682
Higher LBS in Berkshire	3	51320000	51460000	1.85462e-16	0.0796667	51440000	51460000	0.991899
Higher LBS in Berkshire	3	51320000	51460000	1.85462e-16	0.0796667	51380000	51400000	0.99464
Higher LBS in Berkshire	3	51660000	51740000	0.0294896	0.0518655	51660000	51680000	0.995216
Higher LBS in Berkshire	3	51660000	51740000	0.0294896	0.0518655	51680000	51700000	0.988867
Higher LBS in Berkshire	3	51660000	51740000	0.0294896	0.0518655	51700000	51720000	0.986101
Higher LBS in Berkshire	3	51660000	51740000	0.0294896	0.0518655	51720000	51740000	0.983824
Higher LBS in Berkshire	3	52600000	52680000	1.05358e-27	0.056504	52600000	52620000	0.997291
Higher LBS in Berkshire	3	52600000	52680000	1.05358e-27	0.056504	52620000	52640000	0.996582
Higher LBS in Berkshire	3	52600000	52680000	1.05358e-27	0.056504	52640000	52660000	0.993382
Higher LBS in Berkshire	3	52600000	52680000	1.05358e-27	0.056504	52660000	52680000	0.991887
Higher LBS in Berkshire	3	53360000	53460000	1.94079e-05	0.0776869	53360000	53380000	0.992917
Higher LBS in Berkshire	3	53360000	53460000	1.94079e-05	0.0776869	53380000	53400000	0.994984
Higher LBS in Berkshire	3	53360000	53460000	1.94079e-05	0.0776869	53400000	53420000	0.990868
Higher LBS in Berkshire	3	53360000	53460000	1.94079e-05	0.0776869	53420000	53440000	0.995319
Higher LBS in Berkshire	3	53360000	53460000	1.94079e-05	0.0776869	53440000	53460000	0.989299
Higher LBS in Berkshire	3	53780000	53960000	7.69459e-28	0.0936925	53780000	53800000	0.988904
Higher LBS in Berkshire	3	53780000	53960000	7.69459e-28	0.0936925	53800000	53820000	0.989741
Higher LBS in Berkshire	3	53780000	53960000	7.69459e-28	0.0936925	53820000	53840000	0.992316
Higher LBS in Berkshire	3	53780000	53960000	7.69459e-28	0.0936925	53840000	53860000	0.989454
Higher LBS in Berkshire	3	53780000	53960000	7.69459e-28	0.0936925	53880000	53900000	0.992326
Higher LBS in Berkshire	3	53780000	53960000	7.69459e-28	0.0936925	53900000	53920000	0.986302
Higher LBS in Berkshire	3	53780000	53960000	7.69459e-28	0.0936925	53920000	53940000	0.993778
Higher LBS in Berkshire	3	53780000	53960000	7.69459e-28	0.0936925	53940000	53960000	0.992034
Higher LBS in Berkshire	3	53780000	53960000	7.69459e-28	0.0936925	53860000	53880000	0.992828
Higher LBS in Berkshire	3	55020000	55180000	1.23197e-05	0.0775948	55020000	55040000	0.993764
Higher LBS in Berkshire	3	55020000	55180000	1.23197e-05	0.0775948	55060000	55080000	0.99022
Higher LBS in Berkshire	3	55020000	55180000	1.23197e-05	0.0775948	55080000	55100000	0.986633
Higher LBS in Berkshire	3	55020000	55180000	1.23197e-05	0.0775948	55100000	55120000	0.986786
Higher LBS in Berkshire	3	55020000	55180000	1.23197e-05	0.0775948	55120000	55140000	0.990707
Higher LBS in Berkshire	3	55020000	55180000	1.23197e-05	0.0775948	55140000	55160000	0.991107
Higher LBS in Berkshire	3	55020000	55180000	1.23197e-05	0.0775948	55160000	55180000	0.987235
Higher LBS in Berkshire	3	55020000	55180000	1.23197e-05	0.0775948	55040000	55060000	0.992154
Higher LBS in Berkshire	3	55600000	55680000	1.90062e-158	0.0263137	55600000	55620000	0.995907
Higher LBS in Berkshire	3	55600000	55680000	1.90062e-158	0.0263137	55620000	55640000	0.991222
Higher LBS in Berkshire	3	55600000	55680000	1.90062e-158	0.0263137	55640000	55660000	0.997937
Higher LBS in Berkshire	3	55600000	55680000	1.90062e-158	0.0263137	55660000	55680000	0.997044
Higher LBS in Berkshire	3	58060000	58180000	0.000585128	0.0585845	58080000	58100000	0.992385
Higher LBS in Berkshire	3	58060000	58180000	0.000585128	0.0585845	58100000	58120000	0.990311
Higher LBS in Berkshire	3	58060000	58180000	0.000585128	0.0585845	58120000	58140000	0.992298
Higher LBS in Berkshire	3	58060000	58180000	0.000585128	0.0585845	58140000	58160000	0.990123
Higher LBS in Berkshire	3	58060000	58180000	0.000585128	0.0585845	58160000	58180000	0.995134
Higher LBS in Berkshire	3	58060000	58180000	0.000585128	0.0585845	58060000	58080000	0.990582
Higher LBS in Berkshire	3	58640000	58740000	3.43975e-08	0.0732099	58640000	58660000	0.996828
Higher LBS in Berkshire	3	58640000	58740000	3.43975e-08	0.0732099	58660000	58680000	0.996663
Higher LBS in Berkshire	3	58640000	58740000	3.43975e-08	0.0732099	58680000	58700000	0.989412
Higher LBS in Berkshire	3	58640000	58740000	3.43975e-08	0.0732099	58700000	58720000	0.993187
Higher LBS in Berkshire	3	58640000	58740000	3.43975e-08	0.0732099	58720000	58740000	0.992113
Higher LBS in Berkshire	3	60100000	60220000	9.58141e-12	0.0854887	60100000	60120000	0.987068
Higher LBS in Berkshire	3	60100000	60220000	9.58141e-12	0.0854887	60120000	60140000	0.986193
Higher LBS in Berkshire	3	60100000	60220000	9.58141e-12	0.0854887	60140000	60160000	0.989184
Higher LBS in Berkshire	3	60100000	60220000	9.58141e-12	0.0854887	60180000	60200000	0.991582
Higher LBS in Berkshire	3	60100000	60220000	9.58141e-12	0.0854887	60200000	60220000	0.981065
Higher LBS in Berkshire	3	60100000	60220000	9.58141e-12	0.0854887	60160000	60180000	0.992344
Higher LBS in Berkshire	3	70740000	70860000	0.000117668	0.0692272	70740000	70760000	0.991149
Higher LBS in Berkshire	3	70740000	70860000	0.000117668	0.0692272	70780000	70800000	0.993688
Higher LBS in Berkshire	3	70740000	70860000	0.000117668	0.0692272	70800000	70820000	0.991896
Higher LBS in Berkshire	3	70740000	70860000	0.000117668	0.0692272	70820000	70840000	0.991304
Higher LBS in Berkshire	3	70740000	70860000	0.000117668	0.0692272	70840000	70860000	0.993575
Higher LBS in Berkshire	3	70740000	70860000	0.000117668	0.0692272	70760000	70780000	0.991366
Higher LBS in Berkshire	3	79680000	79880000	8.59562e-39	0.0475277	79700000	79720000	0.996486
Higher LBS in Berkshire	3	79680000	79880000	8.59562e-39	0.0475277	79720000	79740000	0.992036
Higher LBS in Berkshire	3	79680000	79880000	8.59562e-39	0.0475277	79740000	79760000	0.994565
Higher LBS in Berkshire	3	79680000	79880000	8.59562e-39	0.0475277	79760000	79780000	0.995143
Higher LBS in Berkshire	3	79680000	79880000	8.59562e-39	0.0475277	79780000	79800000	0.996504
Higher LBS in Berkshire	3	79680000	79880000	8.59562e-39	0.0475277	79800000	79820000	0.998331
Higher LBS in Berkshire	3	79680000	79880000	8.59562e-39	0.0475277	79840000	79860000	0.999283
Higher LBS in Berkshire	3	79680000	79880000	8.59562e-39	0.0475277	79860000	79880000	0.998509
Higher LBS in Berkshire	3	79680000	79880000	8.59562e-39	0.0475277	79820000	79840000	0.998575
Higher LBS in Berkshire	3	79680000	79880000	8.59562e-39	0.0475277	79680000	79700000	0.995799
Higher LBS in Berkshire	3	80620000	80720000	1.12127e-06	0.0514938	80620000	80640000	0.992717
Higher LBS in Berkshire	3	80620000	80720000	1.12127e-06	0.0514938	80640000	80660000	0.987592
Higher LBS in Berkshire	3	80620000	80720000	1.12127e-06	0.0514938	80660000	80680000	0.986198
Higher LBS in Berkshire	3	80620000	80720000	1.12127e-06	0.0514938	80680000	80700000	0.989592
Higher LBS in Berkshire	3	80620000	80720000	1.12127e-06	0.0514938	80700000	80720000	0.983424
Higher LBS in Berkshire	3	90540000	90660000	1.09278e-06	0.0779821	90540000	90560000	0.996363
Higher LBS in Berkshire	3	90540000	90660000	1.09278e-06	0.0779821	90580000	90600000	0.995147
Higher LBS in Berkshire	3	90540000	90660000	1.09278e-06	0.0779821	90600000	90620000	0.997434
Higher LBS in Berkshire	3	90540000	90660000	1.09278e-06	0.0779821	90620000	90640000	0.996332
Higher LBS in Berkshire	3	90540000	90660000	1.09278e-06	0.0779821	90640000	90660000	0.997675
Higher LBS in Berkshire	3	90540000	90660000	1.09278e-06	0.0779821	90560000	90580000	0.996453
Higher LBS in Berkshire	3	97080000	97180000	1.74063e-20	0.0392808	97080000	97100000	0.991451
Higher LBS in Berkshire	3	97080000	97180000	1.74063e-20	0.0392808	97100000	97120000	0.994368
Higher LBS in Berkshire	3	97080000	97180000	1.74063e-20	0.0392808	97140000	97160000	0.985969
Higher LBS in Berkshire	3	97080000	97180000	1.74063e-20	0.0392808	97160000	97180000	0.992393
Higher LBS in Berkshire	3	97080000	97180000	1.74063e-20	0.0392808	97120000	97140000	0.989394
Higher LBS in Berkshire	3	100500000	100560000	1.92268e-08	0.0882833	100500000	100520000	0.990051
Higher LBS in Berkshire	3	100500000	100560000	1.92268e-08	0.0882833	100540000	100560000	0.987895
Higher LBS in Berkshire	3	100500000	100560000	1.92268e-08	0.0882833	100520000	100540000	0.985789
Higher LBS in Berkshire	3	101100000	101320000	1.96515e-09	0.0607038	101100000	101120000	0.991737
Higher LBS in Berkshire	3	101100000	101320000	1.96515e-09	0.0607038	101120000	101140000	0.994496
Higher LBS in Berkshire	3	101100000	101320000	1.96515e-09	0.0607038	101140000	101160000	0.994093
Higher LBS in Berkshire	3	101100000	101320000	1.96515e-09	0.0607038	101160000	101180000	0.994163
Higher LBS in Berkshire	3	101100000	101320000	1.96515e-09	0.0607038	101200000	101220000	0.997976
Higher LBS in Berkshire	3	101100000	101320000	1.96515e-09	0.0607038	101220000	101240000	0.994923
Higher LBS in Berkshire	3	101100000	101320000	1.96515e-09	0.0607038	101240000	101260000	0.998445
Higher LBS in Berkshire	3	101100000	101320000	1.96515e-09	0.0607038	101260000	101280000	0.997768
Higher LBS in Berkshire	3	101100000	101320000	1.96515e-09	0.0607038	101280000	101300000	0.997901
Higher LBS in Berkshire	3	101100000	101320000	1.96515e-09	0.0607038	101180000	101200000	0.996448
Higher LBS in Berkshire	3	101100000	101320000	1.96515e-09	0.0607038	101300000	101320000	0.996521
Higher LBS in Berkshire	3	101700000	101760000	8.55819e-13	0.0366845	101720000	101740000	0.996412
Higher LBS in Berkshire	3	101700000	101760000	8.55819e-13	0.0366845	101740000	101760000	0.996488
Higher LBS in Berkshire	3	101700000	101760000	8.55819e-13	0.0366845	101700000	101720000	0.993721
Higher LBS in Berkshire	3	102260000	102460000	0.00112073	0.131035	102260000	102280000	0.997765
Higher LBS in Berkshire	3	102260000	102460000	0.00112073	0.131035	102280000	102300000	0.997312
Higher LBS in Berkshire	3	102260000	102460000	0.00112073	0.131035	102300000	102320000	0.991064
Higher LBS in Berkshire	3	102260000	102460000	0.00112073	0.131035	102320000	102340000	0.990769
Higher LBS in Berkshire	3	102260000	102460000	0.00112073	0.131035	102340000	102360000	0.99532
Higher LBS in Berkshire	3	102260000	102460000	0.00112073	0.131035	102380000	102400000	0.997556
Higher LBS in Berkshire	3	102260000	102460000	0.00112073	0.131035	102400000	102420000	0.993826
Higher LBS in Berkshire	3	102260000	102460000	0.00112073	0.131035	102420000	102440000	0.993387
Higher LBS in Berkshire	3	102260000	102460000	0.00112073	0.131035	102440000	102460000	0.993879
Higher LBS in Berkshire	3	102260000	102460000	0.00112073	0.131035	102360000	102380000	0.9955
Higher LBS in Berkshire	3	106760000	107060000	0.0032628	0.075192	106760000	106780000	0.986946
Higher LBS in Berkshire	3	106760000	107060000	0.0032628	0.075192	106780000	106800000	0.990161
Higher LBS in Berkshire	3	106760000	107060000	0.0032628	0.075192	106800000	106820000	0.990544
Higher LBS in Berkshire	3	106760000	107060000	0.0032628	0.075192	106840000	106860000	0.987645
Higher LBS in Berkshire	3	106760000	107060000	0.0032628	0.075192	106860000	106880000	0.99599
Higher LBS in Berkshire	3	106760000	107060000	0.0032628	0.075192	106880000	106900000	0.991726
Higher LBS in Berkshire	3	106760000	107060000	0.0032628	0.075192	106900000	106920000	0.987502
Higher LBS in Berkshire	3	106760000	107060000	0.0032628	0.075192	106920000	106940000	0.991318
Higher LBS in Berkshire	3	106760000	107060000	0.0032628	0.075192	106960000	106980000	0.988488
Higher LBS in Berkshire	3	106760000	107060000	0.0032628	0.075192	106980000	107000000	0.99476
Higher LBS in Berkshire	3	106760000	107060000	0.0032628	0.075192	107000000	107020000	0.988183
Higher LBS in Berkshire	3	106760000	107060000	0.0032628	0.075192	107020000	107040000	0.993325
Higher LBS in Berkshire	3	106760000	107060000	0.0032628	0.075192	107040000	107060000	0.997205
Higher LBS in Berkshire	3	106760000	107060000	0.0032628	0.075192	106820000	106840000	0.991491
Higher LBS in Berkshire	3	106760000	107060000	0.0032628	0.075192	106940000	106960000	0.989446
Higher LBS in Berkshire	3	108580000	108720000	1.97263e-12	0.0708569	108580000	108600000	0.984896
Higher LBS in Berkshire	3	108580000	108720000	1.97263e-12	0.0708569	108600000	108620000	0.982747
Higher LBS in Berkshire	3	108580000	108720000	1.97263e-12	0.0708569	108620000	108640000	0.984447
Higher LBS in Berkshire	3	108580000	108720000	1.97263e-12	0.0708569	108660000	108680000	0.982824
Higher LBS in Berkshire	3	108580000	108720000	1.97263e-12	0.0708569	108680000	108700000	0.992293
Higher LBS in Berkshire	3	108580000	108720000	1.97263e-12	0.0708569	108700000	108720000	0.993782
Higher LBS in Berkshire	3	108580000	108720000	1.97263e-12	0.0708569	108640000	108660000	0.98246
Higher LBS in Berkshire	3	109400000	109620000	0.00110093	0.0616521	109400000	109420000	0.996312
Higher LBS in Berkshire	3	109400000	109620000	0.00110093	0.0616521	109420000	109440000	0.996923
Higher LBS in Berkshire	3	109400000	109620000	0.00110093	0.0616521	109460000	109480000	0.997827
Higher LBS in Berkshire	3	109400000	109620000	0.00110093	0.0616521	109480000	109500000	0.994506
Higher LBS in Berkshire	3	109400000	109620000	0.00110093	0.0616521	109500000	109520000	0.996584
Higher LBS in Berkshire	3	109400000	109620000	0.00110093	0.0616521	109520000	109540000	0.996503
Higher LBS in Berkshire	3	109400000	109620000	0.00110093	0.0616521	109540000	109560000	0.995111
Higher LBS in Berkshire	3	109400000	109620000	0.00110093	0.0616521	109580000	109600000	0.992149
Higher LBS in Berkshire	3	109400000	109620000	0.00110093	0.0616521	109600000	109620000	0.987558
Higher LBS in Berkshire	3	109400000	109620000	0.00110093	0.0616521	109440000	109460000	0.998709
Higher LBS in Berkshire	3	109400000	109620000	0.00110093	0.0616521	109560000	109580000	0.991332
Higher LBS in Berkshire	3	110020000	110160000	7.22149e-06	0.0681225	110020000	110040000	0.983224
Higher LBS in Berkshire	3	110020000	110160000	7.22149e-06	0.0681225	110040000	110060000	0.987324
Higher LBS in Berkshire	3	110020000	110160000	7.22149e-06	0.0681225	110060000	110080000	0.986591
Higher LBS in Berkshire	3	110020000	110160000	7.22149e-06	0.0681225	110080000	110100000	0.985753
Higher LBS in Berkshire	3	110020000	110160000	7.22149e-06	0.0681225	110120000	110140000	0.99126
Higher LBS in Berkshire	3	110020000	110160000	7.22149e-06	0.0681225	110140000	110160000	0.990666
Higher LBS in Berkshire	3	110020000	110160000	7.22149e-06	0.0681225	110100000	110120000	0.991634
Higher LBS in Berkshire	3	111100000	111200000	6.02523e-18	0.0365958	111100000	111120000	0.986634
Higher LBS in Berkshire	3	111100000	111200000	6.02523e-18	0.0365958	111120000	111140000	0.994053
Higher LBS in Berkshire	3	111100000	111200000	6.02523e-18	0.0365958	111160000	111180000	0.990947
Higher LBS in Berkshire	3	111100000	111200000	6.02523e-18	0.0365958	111180000	111200000	0.991286
Higher LBS in Berkshire	3	111100000	111200000	6.02523e-18	0.0365958	111140000	111160000	0.98554
Higher LBS in Berkshire	3	116160000	116220000	9.28284e-06	0.0725214	116160000	116180000	0.992682
Higher LBS in Berkshire	3	116160000	116220000	9.28284e-06	0.0725214	116180000	116200000	0.994066
Higher LBS in Berkshire	3	116160000	116220000	9.28284e-06	0.0725214	116200000	116220000	0.98607
Higher LBS in Berkshire	3	116820000	117000000	1.07213e-07	0.0960593	116820000	116840000	0.989162
Higher LBS in Berkshire	3	116820000	117000000	1.07213e-07	0.0960593	116840000	116860000	0.98747
Higher LBS in Berkshire	3	116820000	117000000	1.07213e-07	0.0960593	116860000	116880000	0.993787
Higher LBS in Berkshire	3	116820000	117000000	1.07213e-07	0.0960593	116880000	116900000	0.988151
Higher LBS in Berkshire	3	116820000	117000000	1.07213e-07	0.0960593	116920000	116940000	0.99003
Higher LBS in Berkshire	3	116820000	117000000	1.07213e-07	0.0960593	116940000	116960000	0.987837
Higher LBS in Berkshire	3	116820000	117000000	1.07213e-07	0.0960593	116960000	116980000	0.988017
Higher LBS in Berkshire	3	116820000	117000000	1.07213e-07	0.0960593	116980000	117000000	0.993161
Higher LBS in Berkshire	3	116820000	117000000	1.07213e-07	0.0960593	116900000	116920000	0.991184
Higher LBS in Berkshire	3	117980000	118160000	2.67351e-35	0.0471662	117980000	118000000	0.987404
Higher LBS in Berkshire	3	117980000	118160000	2.67351e-35	0.0471662	118000000	118020000	0.991314
Higher LBS in Berkshire	3	117980000	118160000	2.67351e-35	0.0471662	118020000	118040000	0.980455
Higher LBS in Berkshire	3	117980000	118160000	2.67351e-35	0.0471662	118040000	118060000	0.987063
Higher LBS in Berkshire	3	117980000	118160000	2.67351e-35	0.0471662	118060000	118080000	0.987025
Higher LBS in Berkshire	3	117980000	118160000	2.67351e-35	0.0471662	118100000	118120000	0.983692
Higher LBS in Berkshire	3	117980000	118160000	2.67351e-35	0.0471662	118120000	118140000	0.986862
Higher LBS in Berkshire	3	117980000	118160000	2.67351e-35	0.0471662	118140000	118160000	0.992425
Higher LBS in Berkshire	3	117980000	118160000	2.67351e-35	0.0471662	118080000	118100000	0.984235
Higher LBS in Berkshire	3	118700000	118780000	2.27222e-05	0.0568332	118700000	118720000	0.990257
Higher LBS in Berkshire	3	118700000	118780000	2.27222e-05	0.0568332	118720000	118740000	0.994724
Higher LBS in Berkshire	3	118700000	118780000	2.27222e-05	0.0568332	118760000	118780000	0.992141
Higher LBS in Berkshire	3	118700000	118780000	2.27222e-05	0.0568332	118740000	118760000	0.991753
Higher LBS in Berkshire	3	122160000	122420000	1.51088e-11	0.138462	122160000	122180000	0.989713
Higher LBS in Berkshire	3	122160000	122420000	1.51088e-11	0.138462	122180000	122200000	0.983378
Higher LBS in Berkshire	3	122160000	122420000	1.51088e-11	0.138462	122200000	122220000	0.988882
Higher LBS in Berkshire	3	122160000	122420000	1.51088e-11	0.138462	122220000	122240000	0.98907
Higher LBS in Berkshire	3	122160000	122420000	1.51088e-11	0.138462	122240000	122260000	0.984422
Higher LBS in Berkshire	3	122160000	122420000	1.51088e-11	0.138462	122260000	122280000	0.984932
Higher LBS in Berkshire	3	122160000	122420000	1.51088e-11	0.138462	122300000	122320000	0.98858
Higher LBS in Berkshire	3	122160000	122420000	1.51088e-11	0.138462	122320000	122340000	0.984964
Higher LBS in Berkshire	3	122160000	122420000	1.51088e-11	0.138462	122340000	122360000	0.986076
Higher LBS in Berkshire	3	122160000	122420000	1.51088e-11	0.138462	122360000	122380000	0.98886
Higher LBS in Berkshire	3	122160000	122420000	1.51088e-11	0.138462	122380000	122400000	0.98692
Higher LBS in Berkshire	3	122160000	122420000	1.51088e-11	0.138462	122400000	122420000	0.985526
Higher LBS in Berkshire	3	122160000	122420000	1.51088e-11	0.138462	122280000	122300000	0.98741
Higher LBS in Berkshire	3	122880000	122960000	9.7151e-06	0.0680483	122880000	122900000	0.990346
Higher LBS in Berkshire	3	122880000	122960000	9.7151e-06	0.0680483	122900000	122920000	0.985885
Higher LBS in Berkshire	3	122880000	122960000	9.7151e-06	0.0680483	122920000	122940000	0.992523
Higher LBS in Berkshire	3	122880000	122960000	9.7151e-06	0.0680483	122940000	122960000	0.992405
Higher LBS in Berkshire	3	124720000	124780000	1.99298e-14	0.032041	124720000	124740000	0.989521
Higher LBS in Berkshire	3	124720000	124780000	1.99298e-14	0.032041	124740000	124760000	0.985838
Higher LBS in Berkshire	3	124720000	124780000	1.99298e-14	0.032041	124760000	124780000	0.984772
Higher LBS in Berkshire	3	125720000	125780000	7.91368e-11	0.0492819	125720000	125740000	0.977871
Higher LBS in Berkshire	3	125720000	125780000	7.91368e-11	0.0492819	125740000	125760000	0.983828
Higher LBS in Berkshire	3	125720000	125780000	7.91368e-11	0.0492819	125760000	125780000	0.987146
Higher LBS in Berkshire	3	128580000	128780000	2.05585e-12	0.0719154	128600000	128620000	0.995807
Higher LBS in Berkshire	3	128580000	128780000	2.05585e-12	0.0719154	128620000	128640000	0.98791
Higher LBS in Berkshire	3	128580000	128780000	2.05585e-12	0.0719154	128640000	128660000	0.990293
Higher LBS in Berkshire	3	128580000	128780000	2.05585e-12	0.0719154	128660000	128680000	0.991429
Higher LBS in Berkshire	3	128580000	128780000	2.05585e-12	0.0719154	128680000	128700000	0.986961
Higher LBS in Berkshire	3	128580000	128780000	2.05585e-12	0.0719154	128720000	128740000	0.991646
Higher LBS in Berkshire	3	128580000	128780000	2.05585e-12	0.0719154	128740000	128760000	0.993555
Higher LBS in Berkshire	3	128580000	128780000	2.05585e-12	0.0719154	128760000	128780000	0.988395
Higher LBS in Berkshire	3	128580000	128780000	2.05585e-12	0.0719154	128580000	128600000	0.992946
Higher LBS in Berkshire	3	128580000	128780000	2.05585e-12	0.0719154	128700000	128720000	0.98602
Higher LBS in Berkshire	3	130340000	130520000	1.41218e-05	0.0915502	130340000	130360000	0.992694
Higher LBS in Berkshire	3	130340000	130520000	1.41218e-05	0.0915502	130360000	130380000	0.990199
Higher LBS in Berkshire	3	130340000	130520000	1.41218e-05	0.0915502	130380000	130400000	0.990218
Higher LBS in Berkshire	3	130340000	130520000	1.41218e-05	0.0915502	130420000	130440000	0.993447
Higher LBS in Berkshire	3	130340000	130520000	1.41218e-05	0.0915502	130440000	130460000	0.990809
Higher LBS in Berkshire	3	130340000	130520000	1.41218e-05	0.0915502	130460000	130480000	0.992481
Higher LBS in Berkshire	3	130340000	130520000	1.41218e-05	0.0915502	130480000	130500000	0.995628
Higher LBS in Berkshire	3	130340000	130520000	1.41218e-05	0.0915502	130500000	130520000	0.997201
Higher LBS in Berkshire	3	130340000	130520000	1.41218e-05	0.0915502	130400000	130420000	0.994194
Higher LBS in Berkshire	3	130840000	130900000	0.00773425	0.104121	130840000	130860000	0.987076
Higher LBS in Berkshire	3	130840000	130900000	0.00773425	0.104121	130860000	130880000	0.987358
Higher LBS in Berkshire	3	130840000	130900000	0.00773425	0.104121	130880000	130900000	0.983378
Higher LBS in Berkshire	4	7800000	7860000	2.37961e-09	0.0459579	7800000	7820000	0.988933
Higher LBS in Berkshire	4	7800000	7860000	2.37961e-09	0.0459579	7820000	7840000	0.981475
Higher LBS in Berkshire	4	7800000	7860000	2.37961e-09	0.0459579	7840000	7860000	0.979559
Higher LBS in Berkshire	4	8000000	8060000	6.17977e-20	0.0347306	8000000	8020000	0.979439
Higher LBS in Berkshire	4	8000000	8060000	6.17977e-20	0.0347306	8020000	8040000	0.982824
Higher LBS in Berkshire	4	8000000	8060000	6.17977e-20	0.0347306	8040000	8060000	0.982816
Higher LBS in Berkshire	4	8900000	9240000	1.60881e-09	0.0804098	8920000	8940000	0.984259
Higher LBS in Berkshire	4	8900000	9240000	1.60881e-09	0.0804098	8940000	8960000	0.983694
Higher LBS in Berkshire	4	8900000	9240000	1.60881e-09	0.0804098	8960000	8980000	0.98275
Higher LBS in Berkshire	4	8900000	9240000	1.60881e-09	0.0804098	8980000	9000000	0.981012
Higher LBS in Berkshire	4	8900000	9240000	1.60881e-09	0.0804098	9000000	9020000	0.981538
Higher LBS in Berkshire	4	8900000	9240000	1.60881e-09	0.0804098	9020000	9040000	0.978985
Higher LBS in Berkshire	4	8900000	9240000	1.60881e-09	0.0804098	9060000	9080000	0.991835
Higher LBS in Berkshire	4	8900000	9240000	1.60881e-09	0.0804098	9080000	9100000	0.990288
Higher LBS in Berkshire	4	8900000	9240000	1.60881e-09	0.0804098	9100000	9120000	0.993776
Higher LBS in Berkshire	4	8900000	9240000	1.60881e-09	0.0804098	9120000	9140000	0.992552
Higher LBS in Berkshire	4	8900000	9240000	1.60881e-09	0.0804098	9140000	9160000	0.982254
Higher LBS in Berkshire	4	8900000	9240000	1.60881e-09	0.0804098	9180000	9200000	0.985199
Higher LBS in Berkshire	4	8900000	9240000	1.60881e-09	0.0804098	9200000	9220000	0.988334
Higher LBS in Berkshire	4	8900000	9240000	1.60881e-09	0.0804098	9220000	9240000	0.990434
Higher LBS in Berkshire	4	8900000	9240000	1.60881e-09	0.0804098	8900000	8920000	0.986558
Higher LBS in Berkshire	4	8900000	9240000	1.60881e-09	0.0804098	9040000	9060000	0.988903
Higher LBS in Berkshire	4	8900000	9240000	1.60881e-09	0.0804098	9160000	9180000	0.975907
Higher LBS in Berkshire	4	10680000	10740000	0.0350705	0.249089	10680000	10700000	0.999894
Higher LBS in Berkshire	4	10680000	10740000	0.0350705	0.249089	10700000	10720000	0.999919
Higher LBS in Berkshire	4	10680000	10740000	0.0350705	0.249089	10720000	10740000	0.981884
Higher LBS in Berkshire	4	13440000	13520000	7.59706e-10	0.0564686	13440000	13460000	0.995013
Higher LBS in Berkshire	4	13440000	13520000	7.59706e-10	0.0564686	13460000	13480000	0.992437
Higher LBS in Berkshire	4	13440000	13520000	7.59706e-10	0.0564686	13480000	13500000	0.991809
Higher LBS in Berkshire	4	13440000	13520000	7.59706e-10	0.0564686	13500000	13520000	0.996437
Higher LBS in Berkshire	4	14900000	14980000	8.91836e-43	0.0230011	14900000	14920000	0.982089
Higher LBS in Berkshire	4	14900000	14980000	8.91836e-43	0.0230011	14920000	14940000	0.988604
Higher LBS in Berkshire	4	14900000	14980000	8.91836e-43	0.0230011	14960000	14980000	0.990828
Higher LBS in Berkshire	4	14900000	14980000	8.91836e-43	0.0230011	14940000	14960000	0.987088
Higher LBS in Berkshire	4	15720000	15800000	1.10446e-09	0.034629	15740000	15760000	0.990971
Higher LBS in Berkshire	4	15720000	15800000	1.10446e-09	0.034629	15760000	15780000	0.983408
Higher LBS in Berkshire	4	15720000	15800000	1.10446e-09	0.034629	15780000	15800000	0.980129
Higher LBS in Berkshire	4	15720000	15800000	1.10446e-09	0.034629	15720000	15740000	0.988624
Higher LBS in Berkshire	4	20460000	20680000	8.56196e-06	0.0826674	20460000	20480000	0.991551
Higher LBS in Berkshire	4	20460000	20680000	8.56196e-06	0.0826674	20480000	20500000	0.990189
Higher LBS in Berkshire	4	20460000	20680000	8.56196e-06	0.0826674	20500000	20520000	0.989945
Higher LBS in Berkshire	4	20460000	20680000	8.56196e-06	0.0826674	20520000	20540000	0.991535
Higher LBS in Berkshire	4	20460000	20680000	8.56196e-06	0.0826674	20540000	20560000	0.991822
Higher LBS in Berkshire	4	20460000	20680000	8.56196e-06	0.0826674	20580000	20600000	0.991455
Higher LBS in Berkshire	4	20460000	20680000	8.56196e-06	0.0826674	20600000	20620000	0.992033
Higher LBS in Berkshire	4	20460000	20680000	8.56196e-06	0.0826674	20620000	20640000	0.992973
Higher LBS in Berkshire	4	20460000	20680000	8.56196e-06	0.0826674	20640000	20660000	0.996105
Higher LBS in Berkshire	4	20460000	20680000	8.56196e-06	0.0826674	20660000	20680000	0.990924
Higher LBS in Berkshire	4	20460000	20680000	8.56196e-06	0.0826674	20560000	20580000	0.992496
Higher LBS in Berkshire	4	21740000	21860000	0.000631401	0.0921063	21760000	21780000	0.990176
Higher LBS in Berkshire	4	21740000	21860000	0.000631401	0.0921063	21780000	21800000	0.987795
Higher LBS in Berkshire	4	21740000	21860000	0.000631401	0.0921063	21800000	21820000	0.994507
Higher LBS in Berkshire	4	21740000	21860000	0.000631401	0.0921063	21820000	21840000	0.990104
Higher LBS in Berkshire	4	21740000	21860000	0.000631401	0.0921063	21840000	21860000	0.987922
Higher LBS in Berkshire	4	21740000	21860000	0.000631401	0.0921063	21740000	21760000	0.990645
Higher LBS in Berkshire	4	24260000	24580000	0.00146267	0.259989	24260000	24280000	0.989552
Higher LBS in Berkshire	4	24260000	24580000	0.00146267	0.259989	24280000	24300000	0.994786
Higher LBS in Berkshire	4	24260000	24580000	0.00146267	0.259989	24300000	24320000	0.987974
Higher LBS in Berkshire	4	24260000	24580000	0.00146267	0.259989	24320000	24340000	0.982678
Higher LBS in Berkshire	4	24260000	24580000	0.00146267	0.259989	24340000	24360000	0.991782
Higher LBS in Berkshire	4	24260000	24580000	0.00146267	0.259989	24380000	24400000	0.99152
Higher LBS in Berkshire	4	24260000	24580000	0.00146267	0.259989	24400000	24420000	0.990288
Higher LBS in Berkshire	4	24260000	24580000	0.00146267	0.259989	24420000	24440000	0.992485
Higher LBS in Berkshire	4	24260000	24580000	0.00146267	0.259989	24440000	24460000	0.993173
Higher LBS in Berkshire	4	24260000	24580000	0.00146267	0.259989	24460000	24480000	0.996857
Higher LBS in Berkshire	4	24260000	24580000	0.00146267	0.259989	24480000	24500000	0.995641
Higher LBS in Berkshire	4	24260000	24580000	0.00146267	0.259989	24520000	24540000	0.990204
Higher LBS in Berkshire	4	24260000	24580000	0.00146267	0.259989	24540000	24560000	0.992295
Higher LBS in Berkshire	4	24260000	24580000	0.00146267	0.259989	24560000	24580000	0.996076
Higher LBS in Berkshire	4	24260000	24580000	0.00146267	0.259989	24360000	24380000	0.994632
Higher LBS in Berkshire	4	24260000	24580000	0.00146267	0.259989	24500000	24520000	0.990956
Higher LBS in Berkshire	4	31360000	31620000	2.83254e-16	0.122811	31360000	31380000	0.983845
Higher LBS in Berkshire	4	31360000	31620000	2.83254e-16	0.122811	31380000	31400000	0.982796
Higher LBS in Berkshire	4	31360000	31620000	2.83254e-16	0.122811	31400000	31420000	0.991464
Higher LBS in Berkshire	4	31360000	31620000	2.83254e-16	0.122811	31420000	31440000	0.993141
Higher LBS in Berkshire	4	31360000	31620000	2.83254e-16	0.122811	31460000	31480000	0.992551
Higher LBS in Berkshire	4	31360000	31620000	2.83254e-16	0.122811	31480000	31500000	0.991941
Higher LBS in Berkshire	4	31360000	31620000	2.83254e-16	0.122811	31500000	31520000	0.993216
Higher LBS in Berkshire	4	31360000	31620000	2.83254e-16	0.122811	31520000	31540000	0.990914
Higher LBS in Berkshire	4	31360000	31620000	2.83254e-16	0.122811	31540000	31560000	0.990251
Higher LBS in Berkshire	4	31360000	31620000	2.83254e-16	0.122811	31560000	31580000	0.99316
Higher LBS in Berkshire	4	31360000	31620000	2.83254e-16	0.122811	31600000	31620000	0.99112
Higher LBS in Berkshire	4	31360000	31620000	2.83254e-16	0.122811	31580000	31600000	0.992321
Higher LBS in Berkshire	4	31360000	31620000	2.83254e-16	0.122811	31440000	31460000	0.986242
Higher LBS in Berkshire	4	35100000	35160000	1.07201e-11	0.0478492	35100000	35120000	0.986339
Higher LBS in Berkshire	4	35100000	35160000	1.07201e-11	0.0478492	35140000	35160000	0.99417
Higher LBS in Berkshire	4	35100000	35160000	1.07201e-11	0.0478492	35120000	35140000	0.994696
Higher LBS in Berkshire	4	38480000	38620000	6.76112e-10	0.0632571	38480000	38500000	0.99349
Higher LBS in Berkshire	4	38480000	38620000	6.76112e-10	0.0632571	38500000	38520000	0.994775
Higher LBS in Berkshire	4	38480000	38620000	6.76112e-10	0.0632571	38540000	38560000	0.993611
Higher LBS in Berkshire	4	38480000	38620000	6.76112e-10	0.0632571	38560000	38580000	0.99572
Higher LBS in Berkshire	4	38480000	38620000	6.76112e-10	0.0632571	38580000	38600000	0.990164
Higher LBS in Berkshire	4	38480000	38620000	6.76112e-10	0.0632571	38600000	38620000	0.984672
Higher LBS in Berkshire	4	38480000	38620000	6.76112e-10	0.0632571	38520000	38540000	0.987861
Higher LBS in Berkshire	4	41000000	43300000	0.0385308	0.045183	41000000	41020000	0.993215
Higher LBS in Berkshire	4	41000000	43300000	0.0385308	0.045183	41040000	41060000	0.993269
Higher LBS in Berkshire	4	41000000	43300000	0.0385308	0.045183	41060000	41080000	0.994715
Higher LBS in Berkshire	4	41000000	43300000	0.0385308	0.045183	41080000	41100000	0.996067
Higher LBS in Berkshire	4	41000000	43300000	0.0385308	0.045183	41100000	41120000	0.994909
Higher LBS in Berkshire	4	41000000	43300000	0.0385308	0.045183	41120000	41140000	0.998401
Higher LBS in Berkshire	4	41000000	43300000	0.0385308	0.045183	41160000	41180000	0.996485
Higher LBS in Berkshire	4	41000000	43300000	0.0385308	0.045183	41180000	41200000	0.99377
Higher LBS in Berkshire	4	41000000	43300000	0.0385308	0.045183	41200000	41220000	0.9935
Higher LBS in Berkshire	4	41000000	43300000	0.0385308	0.045183	41220000	41240000	0.990113
Higher LBS in Berkshire	4	41000000	43300000	0.0385308	0.045183	41240000	41260000	0.992912
Higher LBS in Berkshire	4	41000000	43300000	0.0385308	0.045183	41260000	41280000	0.995768
Higher LBS in Berkshire	4	41000000	43300000	0.0385308	0.045183	41300000	41320000	0.995453
Higher LBS in Berkshire	4	41000000	43300000	0.0385308	0.045183	41320000	41340000	0.995366
Higher LBS in Berkshire	4	41000000	43300000	0.0385308	0.045183	41340000	41360000	0.995834
Higher LBS in Berkshire	4	41000000	43300000	0.0385308	0.045183	41360000	41380000	0.994795
Higher LBS in Berkshire	4	41000000	43300000	0.0385308	0.045183	41380000	41400000	0.996329
Higher LBS in Berkshire	4	41000000	43300000	0.0385308	0.045183	41420000	41440000	0.990597
Higher LBS in Berkshire	4	41000000	43300000	0.0385308	0.045183	41440000	41460000	0.989391
Higher LBS in Berkshire	4	41000000	43300000	0.0385308	0.045183	41460000	41480000	0.989275
Higher LBS in Berkshire	4	41000000	43300000	0.0385308	0.045183	41480000	41500000	0.991945
Higher LBS in Berkshire	4	41000000	43300000	0.0385308	0.045183	41500000	41520000	0.995113
Higher LBS in Berkshire	4	41000000	43300000	0.0385308	0.045183	41520000	41540000	0.996816
Higher LBS in Berkshire	4	41000000	43300000	0.0385308	0.045183	41560000	41580000	0.995394
Higher LBS in Berkshire	4	41000000	43300000	0.0385308	0.045183	41580000	41600000	0.987989
Higher LBS in Berkshire	4	41000000	43300000	0.0385308	0.045183	41600000	41620000	0.990076
Higher LBS in Berkshire	4	41000000	43300000	0.0385308	0.045183	41620000	41640000	0.992688
Higher LBS in Berkshire	4	41000000	43300000	0.0385308	0.045183	41640000	41660000	0.991774
Higher LBS in Berkshire	4	41000000	43300000	0.0385308	0.045183	41660000	41680000	0.989245
Higher LBS in Berkshire	4	41000000	43300000	0.0385308	0.045183	41700000	41720000	0.995469
Higher LBS in Berkshire	4	41000000	43300000	0.0385308	0.045183	41720000	41740000	0.991186
Higher LBS in Berkshire	4	41000000	43300000	0.0385308	0.045183	41740000	41760000	0.996948
Higher LBS in Berkshire	4	41000000	43300000	0.0385308	0.045183	41760000	41780000	0.992748
Higher LBS in Berkshire	4	41000000	43300000	0.0385308	0.045183	41780000	41800000	0.989687
Higher LBS in Berkshire	4	41000000	43300000	0.0385308	0.045183	41820000	41840000	0.995533
Higher LBS in Berkshire	4	41000000	43300000	0.0385308	0.045183	41840000	41860000	0.992385
Higher LBS in Berkshire	4	41000000	43300000	0.0385308	0.045183	41860000	41880000	0.991923
Higher LBS in Berkshire	4	41000000	43300000	0.0385308	0.045183	41880000	41900000	0.988276
Higher LBS in Berkshire	4	41000000	43300000	0.0385308	0.045183	41900000	41920000	0.989721
Higher LBS in Berkshire	4	41000000	43300000	0.0385308	0.045183	41920000	41940000	0.995187
Higher LBS in Berkshire	4	41000000	43300000	0.0385308	0.045183	41960000	41980000	0.993017
Higher LBS in Berkshire	4	41000000	43300000	0.0385308	0.045183	41980000	42000000	0.994576
Higher LBS in Berkshire	4	41000000	43300000	0.0385308	0.045183	42000000	42020000	0.995325
Higher LBS in Berkshire	4	41000000	43300000	0.0385308	0.045183	42020000	42040000	0.99444
Higher LBS in Berkshire	4	41000000	43300000	0.0385308	0.045183	42040000	42060000	0.992734
Higher LBS in Berkshire	4	41000000	43300000	0.0385308	0.045183	42080000	42100000	0.995929
Higher LBS in Berkshire	4	41000000	43300000	0.0385308	0.045183	42100000	42120000	0.988527
Higher LBS in Berkshire	4	41000000	43300000	0.0385308	0.045183	42120000	42140000	0.995239
Higher LBS in Berkshire	4	41000000	43300000	0.0385308	0.045183	42140000	42160000	0.992948
Higher LBS in Berkshire	4	41000000	43300000	0.0385308	0.045183	42160000	42180000	0.995181
Higher LBS in Berkshire	4	41000000	43300000	0.0385308	0.045183	42180000	42200000	0.997059
Higher LBS in Berkshire	4	41000000	43300000	0.0385308	0.045183	42220000	42240000	0.99571
Higher LBS in Berkshire	4	41000000	43300000	0.0385308	0.045183	42240000	42260000	0.994447
Higher LBS in Berkshire	4	41000000	43300000	0.0385308	0.045183	42260000	42280000	0.996546
Higher LBS in Berkshire	4	41000000	43300000	0.0385308	0.045183	42280000	42300000	0.995937
Higher LBS in Berkshire	4	41000000	43300000	0.0385308	0.045183	42300000	42320000	0.997273
Higher LBS in Berkshire	4	41000000	43300000	0.0385308	0.045183	42340000	42360000	0.992292
Higher LBS in Berkshire	4	41000000	43300000	0.0385308	0.045183	42360000	42380000	0.996079
Higher LBS in Berkshire	4	41000000	43300000	0.0385308	0.045183	42380000	42400000	0.994041
Higher LBS in Berkshire	4	41000000	43300000	0.0385308	0.045183	42400000	42420000	0.993179
Higher LBS in Berkshire	4	41000000	43300000	0.0385308	0.045183	42420000	42440000	0.992768
Higher LBS in Berkshire	4	41000000	43300000	0.0385308	0.045183	42440000	42460000	0.994447
Higher LBS in Berkshire	4	41000000	43300000	0.0385308	0.045183	42480000	42500000	0.99186
Higher LBS in Berkshire	4	41000000	43300000	0.0385308	0.045183	42500000	42520000	0.99399
Higher LBS in Berkshire	4	41000000	43300000	0.0385308	0.045183	42520000	42540000	0.991555
Higher LBS in Berkshire	4	41000000	43300000	0.0385308	0.045183	42540000	42560000	0.991245
Higher LBS in Berkshire	4	41000000	43300000	0.0385308	0.045183	42560000	42580000	0.996169
Higher LBS in Berkshire	4	41000000	43300000	0.0385308	0.045183	42600000	42620000	0.995274
Higher LBS in Berkshire	4	41000000	43300000	0.0385308	0.045183	42620000	42640000	0.986475
Higher LBS in Berkshire	4	41000000	43300000	0.0385308	0.045183	42640000	42660000	0.993153
Higher LBS in Berkshire	4	41000000	43300000	0.0385308	0.045183	42660000	42680000	0.994517
Higher LBS in Berkshire	4	41000000	43300000	0.0385308	0.045183	42680000	42700000	0.996185
Higher LBS in Berkshire	4	41000000	43300000	0.0385308	0.045183	42700000	42720000	0.992142
Higher LBS in Berkshire	4	41000000	43300000	0.0385308	0.045183	42740000	42760000	0.995994
Higher LBS in Berkshire	4	41000000	43300000	0.0385308	0.045183	42760000	42780000	0.997957
Higher LBS in Berkshire	4	41000000	43300000	0.0385308	0.045183	42780000	42800000	0.993967
Higher LBS in Berkshire	4	41000000	43300000	0.0385308	0.045183	42800000	42820000	0.994575
Higher LBS in Berkshire	4	41000000	43300000	0.0385308	0.045183	42820000	42840000	0.992939
Higher LBS in Berkshire	4	41000000	43300000	0.0385308	0.045183	42840000	42860000	0.992744
Higher LBS in Berkshire	4	41000000	43300000	0.0385308	0.045183	42880000	42900000	0.994105
Higher LBS in Berkshire	4	41000000	43300000	0.0385308	0.045183	42900000	42920000	0.983148
Higher LBS in Berkshire	4	41000000	43300000	0.0385308	0.045183	42920000	42940000	0.985342
Higher LBS in Berkshire	4	41000000	43300000	0.0385308	0.045183	42940000	42960000	0.997726
Higher LBS in Berkshire	4	41000000	43300000	0.0385308	0.045183	42960000	42980000	0.997314
Higher LBS in Berkshire	4	41000000	43300000	0.0385308	0.045183	43000000	43020000	0.997618
Higher LBS in Berkshire	4	41000000	43300000	0.0385308	0.045183	43020000	43040000	0.996503
Higher LBS in Berkshire	4	41000000	43300000	0.0385308	0.045183	43040000	43060000	0.996611
Higher LBS in Berkshire	4	41000000	43300000	0.0385308	0.045183	43060000	43080000	0.997311
Higher LBS in Berkshire	4	41000000	43300000	0.0385308	0.045183	43080000	43100000	0.995758
Higher LBS in Berkshire	4	41000000	43300000	0.0385308	0.045183	43100000	43120000	0.994006
Higher LBS in Berkshire	4	41000000	43300000	0.0385308	0.045183	43140000	43160000	0.994511
Higher LBS in Berkshire	4	41000000	43300000	0.0385308	0.045183	43160000	43180000	0.992638
Higher LBS in Berkshire	4	41000000	43300000	0.0385308	0.045183	43180000	43200000	0.994881
Higher LBS in Berkshire	4	41000000	43300000	0.0385308	0.045183	43200000	43220000	0.992604
Higher LBS in Berkshire	4	41000000	43300000	0.0385308	0.045183	43220000	43240000	0.989815
Higher LBS in Berkshire	4	41000000	43300000	0.0385308	0.045183	43260000	43280000	0.995893
Higher LBS in Berkshire	4	41000000	43300000	0.0385308	0.045183	43280000	43300000	0.996551
Higher LBS in Berkshire	4	41000000	43300000	0.0385308	0.045183	41020000	41040000	0.996771
Higher LBS in Berkshire	4	41000000	43300000	0.0385308	0.045183	41140000	41160000	0.996155
Higher LBS in Berkshire	4	41000000	43300000	0.0385308	0.045183	41280000	41300000	0.996065
Higher LBS in Berkshire	4	41000000	43300000	0.0385308	0.045183	41400000	41420000	0.991627
Higher LBS in Berkshire	4	41000000	43300000	0.0385308	0.045183	41540000	41560000	0.996934
Higher LBS in Berkshire	4	41000000	43300000	0.0385308	0.045183	41680000	41700000	0.993744
Higher LBS in Berkshire	4	41000000	43300000	0.0385308	0.045183	41800000	41820000	0.995014
Higher LBS in Berkshire	4	41000000	43300000	0.0385308	0.045183	42060000	42080000	0.996306
Higher LBS in Berkshire	4	41000000	43300000	0.0385308	0.045183	42200000	42220000	0.997803
Higher LBS in Berkshire	4	41000000	43300000	0.0385308	0.045183	42320000	42340000	0.996447
Higher LBS in Berkshire	4	41000000	43300000	0.0385308	0.045183	42460000	42480000	0.994195
Higher LBS in Berkshire	4	41000000	43300000	0.0385308	0.045183	42580000	42600000	0.995601
Higher LBS in Berkshire	4	41000000	43300000	0.0385308	0.045183	42720000	42740000	0.995604
Higher LBS in Berkshire	4	41000000	43300000	0.0385308	0.045183	42860000	42880000	0.996189
Higher LBS in Berkshire	4	41000000	43300000	0.0385308	0.045183	43120000	43140000	0.994167
Higher LBS in Berkshire	4	41000000	43300000	0.0385308	0.045183	43240000	43260000	0.995984
Higher LBS in Berkshire	4	41000000	43300000	0.0385308	0.045183	42980000	43000000	0.997093
Higher LBS in Berkshire	4	41000000	43300000	0.0385308	0.045183	41940000	41960000	0.991589
Higher LBS in Berkshire	4	45500000	45560000	0.0222409	0.076362	45500000	45520000	0.999103
Higher LBS in Berkshire	4	45500000	45560000	0.0222409	0.076362	45520000	45540000	0.996058
Higher LBS in Berkshire	4	45500000	45560000	0.0222409	0.076362	45540000	45560000	0.997168
Higher LBS in Berkshire	4	46380000	46460000	1.49713e-08	0.142874	46400000	46420000	0.996192
Higher LBS in Berkshire	4	46380000	46460000	1.49713e-08	0.142874	46420000	46440000	0.994457
Higher LBS in Berkshire	4	46380000	46460000	1.49713e-08	0.142874	46440000	46460000	0.996576
Higher LBS in Berkshire	4	46380000	46460000	1.49713e-08	0.142874	46380000	46400000	0.997476
Higher LBS in Berkshire	4	46840000	46960000	5.10205e-09	0.0566765	46840000	46860000	0.995413
Higher LBS in Berkshire	4	46840000	46960000	5.10205e-09	0.0566765	46860000	46880000	0.996527
Higher LBS in Berkshire	4	46840000	46960000	5.10205e-09	0.0566765	46880000	46900000	0.997797
Higher LBS in Berkshire	4	46840000	46960000	5.10205e-09	0.0566765	46900000	46920000	0.996207
Higher LBS in Berkshire	4	46840000	46960000	5.10205e-09	0.0566765	46940000	46960000	0.997363
Higher LBS in Berkshire	4	46840000	46960000	5.10205e-09	0.0566765	46920000	46940000	0.997059
Higher LBS in Berkshire	4	50120000	50240000	1.85797e-07	0.0834864	50120000	50140000	0.995875
Higher LBS in Berkshire	4	50120000	50240000	1.85797e-07	0.0834864	50140000	50160000	0.995225
Higher LBS in Berkshire	4	50120000	50240000	1.85797e-07	0.0834864	50160000	50180000	0.993779
Higher LBS in Berkshire	4	50120000	50240000	1.85797e-07	0.0834864	50180000	50200000	0.995638
Higher LBS in Berkshire	4	50120000	50240000	1.85797e-07	0.0834864	50220000	50240000	0.997418
Higher LBS in Berkshire	4	50120000	50240000	1.85797e-07	0.0834864	50200000	50220000	0.996347
Higher LBS in Berkshire	4	50500000	50720000	4.09025e-49	0.0446655	50500000	50520000	0.994748
Higher LBS in Berkshire	4	50500000	50720000	4.09025e-49	0.0446655	50520000	50540000	0.996688
Higher LBS in Berkshire	4	50500000	50720000	4.09025e-49	0.0446655	50540000	50560000	0.997354
Higher LBS in Berkshire	4	50500000	50720000	4.09025e-49	0.0446655	50560000	50580000	0.996424
Higher LBS in Berkshire	4	50500000	50720000	4.09025e-49	0.0446655	50600000	50620000	0.993054
Higher LBS in Berkshire	4	50500000	50720000	4.09025e-49	0.0446655	50620000	50640000	0.995928
Higher LBS in Berkshire	4	50500000	50720000	4.09025e-49	0.0446655	50640000	50660000	0.989476
Higher LBS in Berkshire	4	50500000	50720000	4.09025e-49	0.0446655	50660000	50680000	0.995741
Higher LBS in Berkshire	4	50500000	50720000	4.09025e-49	0.0446655	50680000	50700000	0.992057
Higher LBS in Berkshire	4	50500000	50720000	4.09025e-49	0.0446655	50700000	50720000	0.991702
Higher LBS in Berkshire	4	50500000	50720000	4.09025e-49	0.0446655	50580000	50600000	0.995227
Higher LBS in Berkshire	4	51320000	51400000	8.08318e-06	0.0428162	51320000	51340000	0.99479
Higher LBS in Berkshire	4	51320000	51400000	8.08318e-06	0.0428162	51340000	51360000	0.994398
Higher LBS in Berkshire	4	51320000	51400000	8.08318e-06	0.0428162	51360000	51380000	0.990555
Higher LBS in Berkshire	4	51320000	51400000	8.08318e-06	0.0428162	51380000	51400000	0.994044
Higher LBS in Berkshire	4	53440000	53560000	5.05015e-05	0.120094	53440000	53460000	0.995564
Higher LBS in Berkshire	4	53440000	53560000	5.05015e-05	0.120094	53480000	53500000	0.995368
Higher LBS in Berkshire	4	53440000	53560000	5.05015e-05	0.120094	53500000	53520000	0.992146
Higher LBS in Berkshire	4	53440000	53560000	5.05015e-05	0.120094	53520000	53540000	0.991912
Higher LBS in Berkshire	4	53440000	53560000	5.05015e-05	0.120094	53540000	53560000	0.996831
Higher LBS in Berkshire	4	53440000	53560000	5.05015e-05	0.120094	53460000	53480000	0.995488
Higher LBS in Berkshire	4	56620000	56680000	0.00347669	0.060503	56640000	56660000	0.996192
Higher LBS in Berkshire	4	56620000	56680000	0.00347669	0.060503	56660000	56680000	0.998158
Higher LBS in Berkshire	4	56620000	56680000	0.00347669	0.060503	56620000	56640000	0.995844
Higher LBS in Berkshire	4	58080000	58260000	0.000856936	0.169748	58080000	58100000	0.990314
Higher LBS in Berkshire	4	58080000	58260000	0.000856936	0.169748	58100000	58120000	0.992443
Higher LBS in Berkshire	4	58080000	58260000	0.000856936	0.169748	58120000	58140000	0.996595
Higher LBS in Berkshire	4	58080000	58260000	0.000856936	0.169748	58140000	58160000	0.995304
Higher LBS in Berkshire	4	58080000	58260000	0.000856936	0.169748	58160000	58180000	0.996397
Higher LBS in Berkshire	4	58080000	58260000	0.000856936	0.169748	58200000	58220000	0.994105
Higher LBS in Berkshire	4	58080000	58260000	0.000856936	0.169748	58220000	58240000	0.993265
Higher LBS in Berkshire	4	58080000	58260000	0.000856936	0.169748	58240000	58260000	0.995254
Higher LBS in Berkshire	4	58080000	58260000	0.000856936	0.169748	58180000	58200000	0.996811
Higher LBS in Berkshire	4	61600000	61720000	0.0115751	0.0655385	61620000	61640000	0.991069
Higher LBS in Berkshire	4	61600000	61720000	0.0115751	0.0655385	61640000	61660000	0.98929
Higher LBS in Berkshire	4	61600000	61720000	0.0115751	0.0655385	61660000	61680000	0.993382
Higher LBS in Berkshire	4	61600000	61720000	0.0115751	0.0655385	61680000	61700000	0.991454
Higher LBS in Berkshire	4	61600000	61720000	0.0115751	0.0655385	61700000	61720000	0.992432
Higher LBS in Berkshire	4	61600000	61720000	0.0115751	0.0655385	61600000	61620000	0.990074
Higher LBS in Berkshire	4	67320000	67560000	0.000104202	0.057163	67320000	67340000	0.990242
Higher LBS in Berkshire	4	67320000	67560000	0.000104202	0.057163	67340000	67360000	0.996951
Higher LBS in Berkshire	4	67320000	67560000	0.000104202	0.057163	67380000	67400000	0.989079
Higher LBS in Berkshire	4	67320000	67560000	0.000104202	0.057163	67400000	67420000	0.993059
Higher LBS in Berkshire	4	67320000	67560000	0.000104202	0.057163	67420000	67440000	0.994107
Higher LBS in Berkshire	4	67320000	67560000	0.000104202	0.057163	67440000	67460000	0.996637
Higher LBS in Berkshire	4	67320000	67560000	0.000104202	0.057163	67460000	67480000	0.999103
Higher LBS in Berkshire	4	67320000	67560000	0.000104202	0.057163	67480000	67500000	0.999117
Higher LBS in Berkshire	4	67320000	67560000	0.000104202	0.057163	67520000	67540000	0.998667
Higher LBS in Berkshire	4	67320000	67560000	0.000104202	0.057163	67540000	67560000	0.999158
Higher LBS in Berkshire	4	67320000	67560000	0.000104202	0.057163	67360000	67380000	0.990515
Higher LBS in Berkshire	4	67320000	67560000	0.000104202	0.057163	67500000	67520000	0.998507
Higher LBS in Berkshire	4	68520000	68580000	2.69848e-23	0.0335376	68520000	68540000	0.994594
Higher LBS in Berkshire	4	68520000	68580000	2.69848e-23	0.0335376	68560000	68580000	0.998431
Higher LBS in Berkshire	4	68520000	68580000	2.69848e-23	0.0335376	68540000	68560000	0.997893
Higher LBS in Berkshire	4	70340000	70440000	9.27114e-08	0.0664233	70340000	70360000	0.98842
Higher LBS in Berkshire	4	70340000	70440000	9.27114e-08	0.0664233	70360000	70380000	0.991152
Higher LBS in Berkshire	4	70340000	70440000	9.27114e-08	0.0664233	70400000	70420000	0.990052
Higher LBS in Berkshire	4	70340000	70440000	9.27114e-08	0.0664233	70420000	70440000	0.989063
Higher LBS in Berkshire	4	70340000	70440000	9.27114e-08	0.0664233	70380000	70400000	0.989009
Higher LBS in Berkshire	4	71100000	71300000	1.9439e-06	0.0883928	71100000	71120000	0.988339
Higher LBS in Berkshire	4	71100000	71300000	1.9439e-06	0.0883928	71120000	71140000	0.98988
Higher LBS in Berkshire	4	71100000	71300000	1.9439e-06	0.0883928	71140000	71160000	0.985438
Higher LBS in Berkshire	4	71100000	71300000	1.9439e-06	0.0883928	71180000	71200000	0.986725
Higher LBS in Berkshire	4	71100000	71300000	1.9439e-06	0.0883928	71200000	71220000	0.990733
Higher LBS in Berkshire	4	71100000	71300000	1.9439e-06	0.0883928	71220000	71240000	0.990774
Higher LBS in Berkshire	4	71100000	71300000	1.9439e-06	0.0883928	71240000	71260000	0.994919
Higher LBS in Berkshire	4	71100000	71300000	1.9439e-06	0.0883928	71260000	71280000	0.991753
Higher LBS in Berkshire	4	71100000	71300000	1.9439e-06	0.0883928	71280000	71300000	0.992685
Higher LBS in Berkshire	4	71100000	71300000	1.9439e-06	0.0883928	71160000	71180000	0.988239
Higher LBS in Berkshire	4	71720000	71840000	1.90206e-05	0.060454	71720000	71740000	0.987531
Higher LBS in Berkshire	4	71720000	71840000	1.90206e-05	0.060454	71740000	71760000	0.992772
Higher LBS in Berkshire	4	71720000	71840000	1.90206e-05	0.060454	71760000	71780000	0.996201
Higher LBS in Berkshire	4	71720000	71840000	1.90206e-05	0.060454	71780000	71800000	0.98806
Higher LBS in Berkshire	4	71720000	71840000	1.90206e-05	0.060454	71800000	71820000	0.992908
Higher LBS in Berkshire	4	71720000	71840000	1.90206e-05	0.060454	71820000	71840000	0.989578
Higher LBS in Berkshire	4	72120000	72340000	2.13625e-22	0.0502404	72120000	72140000	0.993927
Higher LBS in Berkshire	4	72120000	72340000	2.13625e-22	0.0502404	72140000	72160000	0.994707
Higher LBS in Berkshire	4	72120000	72340000	2.13625e-22	0.0502404	72160000	72180000	0.997073
Higher LBS in Berkshire	4	72120000	72340000	2.13625e-22	0.0502404	72180000	72200000	0.997923
Higher LBS in Berkshire	4	72120000	72340000	2.13625e-22	0.0502404	72200000	72220000	0.994362
Higher LBS in Berkshire	4	72120000	72340000	2.13625e-22	0.0502404	72240000	72260000	0.997646
Higher LBS in Berkshire	4	72120000	72340000	2.13625e-22	0.0502404	72260000	72280000	0.99602
Higher LBS in Berkshire	4	72120000	72340000	2.13625e-22	0.0502404	72280000	72300000	0.996936
Higher LBS in Berkshire	4	72120000	72340000	2.13625e-22	0.0502404	72300000	72320000	0.993326
Higher LBS in Berkshire	4	72120000	72340000	2.13625e-22	0.0502404	72320000	72340000	0.990891
Higher LBS in Berkshire	4	72120000	72340000	2.13625e-22	0.0502404	72220000	72240000	0.995195
Higher LBS in Berkshire	4	72600000	72700000	1.07006e-193	0.0184972	72620000	72640000	0.994963
Higher LBS in Berkshire	4	72600000	72700000	1.07006e-193	0.0184972	72640000	72660000	0.993743
Higher LBS in Berkshire	4	72600000	72700000	1.07006e-193	0.0184972	72660000	72680000	0.992711
Higher LBS in Berkshire	4	72600000	72700000	1.07006e-193	0.0184972	72680000	72700000	0.994516
Higher LBS in Berkshire	4	72600000	72700000	1.07006e-193	0.0184972	72600000	72620000	0.99645
Higher LBS in Berkshire	4	74480000	74760000	2.06747e-12	0.0706371	74480000	74500000	0.992699
Higher LBS in Berkshire	4	74480000	74760000	2.06747e-12	0.0706371	74500000	74520000	0.992772
Higher LBS in Berkshire	4	74480000	74760000	2.06747e-12	0.0706371	74520000	74540000	0.992264
Higher LBS in Berkshire	4	74480000	74760000	2.06747e-12	0.0706371	74540000	74560000	0.983052
Higher LBS in Berkshire	4	74480000	74760000	2.06747e-12	0.0706371	74580000	74600000	0.989754
Higher LBS in Berkshire	4	74480000	74760000	2.06747e-12	0.0706371	74600000	74620000	0.989285
Higher LBS in Berkshire	4	74480000	74760000	2.06747e-12	0.0706371	74620000	74640000	0.992614
Higher LBS in Berkshire	4	74480000	74760000	2.06747e-12	0.0706371	74640000	74660000	0.988709
Higher LBS in Berkshire	4	74480000	74760000	2.06747e-12	0.0706371	74660000	74680000	0.992475
Higher LBS in Berkshire	4	74480000	74760000	2.06747e-12	0.0706371	74680000	74700000	0.979941
Higher LBS in Berkshire	4	74480000	74760000	2.06747e-12	0.0706371	74720000	74740000	0.984033
Higher LBS in Berkshire	4	74480000	74760000	2.06747e-12	0.0706371	74740000	74760000	0.992765
Higher LBS in Berkshire	4	74480000	74760000	2.06747e-12	0.0706371	74560000	74580000	0.991342
Higher LBS in Berkshire	4	74480000	74760000	2.06747e-12	0.0706371	74700000	74720000	0.991871
Higher LBS in Berkshire	4	75040000	75120000	1.43343e-08	0.0324185	75040000	75060000	0.985869
Higher LBS in Berkshire	4	75040000	75120000	1.43343e-08	0.0324185	75060000	75080000	0.989535
Higher LBS in Berkshire	4	75040000	75120000	1.43343e-08	0.0324185	75080000	75100000	0.993743
Higher LBS in Berkshire	4	75040000	75120000	1.43343e-08	0.0324185	75100000	75120000	0.988088
Higher LBS in Berkshire	4	86820000	86880000	6.62693e-11	0.0568305	86820000	86840000	0.991129
Higher LBS in Berkshire	4	86820000	86880000	6.62693e-11	0.0568305	86840000	86860000	0.990164
Higher LBS in Berkshire	4	86820000	86880000	6.62693e-11	0.0568305	86860000	86880000	0.992115
Higher LBS in Berkshire	4	87040000	87200000	2.69752e-06	0.121352	87040000	87060000	0.99111
Higher LBS in Berkshire	4	87040000	87200000	2.69752e-06	0.121352	87060000	87080000	0.996422
Higher LBS in Berkshire	4	87040000	87200000	2.69752e-06	0.121352	87080000	87100000	0.995413
Higher LBS in Berkshire	4	87040000	87200000	2.69752e-06	0.121352	87100000	87120000	0.988128
Higher LBS in Berkshire	4	87040000	87200000	2.69752e-06	0.121352	87120000	87140000	0.995691
Higher LBS in Berkshire	4	87040000	87200000	2.69752e-06	0.121352	87140000	87160000	0.991817
Higher LBS in Berkshire	4	87040000	87200000	2.69752e-06	0.121352	87180000	87200000	0.995764
Higher LBS in Berkshire	4	87040000	87200000	2.69752e-06	0.121352	87160000	87180000	0.993143
Higher LBS in Berkshire	4	87680000	87740000	1.65989e-05	0.100206	87700000	87720000	0.994736
Higher LBS in Berkshire	4	87680000	87740000	1.65989e-05	0.100206	87720000	87740000	0.992183
Higher LBS in Berkshire	4	87680000	87740000	1.65989e-05	0.100206	87680000	87700000	0.99733
Higher LBS in Berkshire	4	89580000	89700000	0.0351188	0.197569	89580000	89600000	1
Higher LBS in Berkshire	4	89580000	89700000	0.0351188	0.197569	89600000	89620000	1
Higher LBS in Berkshire	4	89580000	89700000	0.0351188	0.197569	89620000	89640000	0.996379
Higher LBS in Berkshire	4	89580000	89700000	0.0351188	0.197569	89660000	89680000	0.994938
Higher LBS in Berkshire	4	89580000	89700000	0.0351188	0.197569	89680000	89700000	0.995105
Higher LBS in Berkshire	4	89580000	89700000	0.0351188	0.197569	89640000	89660000	0.995551
Higher LBS in Berkshire	4	91600000	91660000	7.91668e-09	0.0680525	91620000	91640000	0.991324
Higher LBS in Berkshire	4	91600000	91660000	7.91668e-09	0.0680525	91640000	91660000	0.996713
Higher LBS in Berkshire	4	91600000	91660000	7.91668e-09	0.0680525	91600000	91620000	0.995112
Higher LBS in Berkshire	4	93020000	93200000	6.93304e-12	0.0448393	93020000	93040000	0.99589
Higher LBS in Berkshire	4	93020000	93200000	6.93304e-12	0.0448393	93040000	93060000	0.995332
Higher LBS in Berkshire	4	93020000	93200000	6.93304e-12	0.0448393	93080000	93100000	0.994803
Higher LBS in Berkshire	4	93020000	93200000	6.93304e-12	0.0448393	93100000	93120000	0.992381
Higher LBS in Berkshire	4	93020000	93200000	6.93304e-12	0.0448393	93120000	93140000	0.997175
Higher LBS in Berkshire	4	93020000	93200000	6.93304e-12	0.0448393	93140000	93160000	0.995365
Higher LBS in Berkshire	4	93020000	93200000	6.93304e-12	0.0448393	93160000	93180000	0.993873
Higher LBS in Berkshire	4	93020000	93200000	6.93304e-12	0.0448393	93060000	93080000	0.99248
Higher LBS in Berkshire	4	93020000	93200000	6.93304e-12	0.0448393	93180000	93200000	0.992723
Higher LBS in Berkshire	4	93500000	93560000	3.57118e-18	0.0281145	93500000	93520000	0.990575
Higher LBS in Berkshire	4	93500000	93560000	3.57118e-18	0.0281145	93520000	93540000	0.994025
Higher LBS in Berkshire	4	93500000	93560000	3.57118e-18	0.0281145	93540000	93560000	0.997221
Higher LBS in Berkshire	4	98960000	99160000	1.02445e-07	0.0575434	98960000	98980000	0.994736
Higher LBS in Berkshire	4	98960000	99160000	1.02445e-07	0.0575434	98980000	99000000	0.995798
Higher LBS in Berkshire	4	98960000	99160000	1.02445e-07	0.0575434	99000000	99020000	0.993476
Higher LBS in Berkshire	4	98960000	99160000	1.02445e-07	0.0575434	99020000	99040000	0.994585
Higher LBS in Berkshire	4	98960000	99160000	1.02445e-07	0.0575434	99040000	99060000	0.994351
Higher LBS in Berkshire	4	98960000	99160000	1.02445e-07	0.0575434	99060000	99080000	0.996165
Higher LBS in Berkshire	4	98960000	99160000	1.02445e-07	0.0575434	99100000	99120000	0.998953
Higher LBS in Berkshire	4	98960000	99160000	1.02445e-07	0.0575434	99120000	99140000	0.997666
Higher LBS in Berkshire	4	98960000	99160000	1.02445e-07	0.0575434	99140000	99160000	0.995156
Higher LBS in Berkshire	4	98960000	99160000	1.02445e-07	0.0575434	99080000	99100000	0.997403
Higher LBS in Berkshire	4	100300000	100400000	0.000140005	0.120252	100300000	100320000	0.998021
Higher LBS in Berkshire	4	100300000	100400000	0.000140005	0.120252	100320000	100340000	0.997162
Higher LBS in Berkshire	4	100300000	100400000	0.000140005	0.120252	100340000	100360000	0.998873
Higher LBS in Berkshire	4	100300000	100400000	0.000140005	0.120252	100360000	100380000	0.998526
Higher LBS in Berkshire	4	100300000	100400000	0.000140005	0.120252	100380000	100400000	0.998761
Higher LBS in Berkshire	4	101440000	101740000	7.68959e-08	0.111808	101460000	101480000	0.990875
Higher LBS in Berkshire	4	101440000	101740000	7.68959e-08	0.111808	101480000	101500000	0.994994
Higher LBS in Berkshire	4	101440000	101740000	7.68959e-08	0.111808	101500000	101520000	0.99186
Higher LBS in Berkshire	4	101440000	101740000	7.68959e-08	0.111808	101520000	101540000	0.995266
Higher LBS in Berkshire	4	101440000	101740000	7.68959e-08	0.111808	101540000	101560000	0.988253
Higher LBS in Berkshire	4	101440000	101740000	7.68959e-08	0.111808	101560000	101580000	0.993565
Higher LBS in Berkshire	4	101440000	101740000	7.68959e-08	0.111808	101600000	101620000	0.997169
Higher LBS in Berkshire	4	101440000	101740000	7.68959e-08	0.111808	101620000	101640000	0.996145
Higher LBS in Berkshire	4	101440000	101740000	7.68959e-08	0.111808	101640000	101660000	0.990047
Higher LBS in Berkshire	4	101440000	101740000	7.68959e-08	0.111808	101660000	101680000	0.989833
Higher LBS in Berkshire	4	101440000	101740000	7.68959e-08	0.111808	101680000	101700000	0.997588
Higher LBS in Berkshire	4	101440000	101740000	7.68959e-08	0.111808	101720000	101740000	0.992331
Higher LBS in Berkshire	4	101440000	101740000	7.68959e-08	0.111808	101440000	101460000	0.99521
Higher LBS in Berkshire	4	101440000	101740000	7.68959e-08	0.111808	101580000	101600000	0.995933
Higher LBS in Berkshire	4	101440000	101740000	7.68959e-08	0.111808	101700000	101720000	0.996108
Higher LBS in Berkshire	4	106260000	106340000	3.13931e-06	0.0668085	106260000	106280000	0.986504
Higher LBS in Berkshire	4	106260000	106340000	3.13931e-06	0.0668085	106300000	106320000	0.992708
Higher LBS in Berkshire	4	106260000	106340000	3.13931e-06	0.0668085	106320000	106340000	0.988573
Higher LBS in Berkshire	4	106260000	106340000	3.13931e-06	0.0668085	106280000	106300000	0.989998
Higher LBS in Berkshire	4	107080000	107140000	1.8506e-33	0.0277503	107100000	107120000	0.992585
Higher LBS in Berkshire	4	107080000	107140000	1.8506e-33	0.0277503	107120000	107140000	0.989735
Higher LBS in Berkshire	4	107080000	107140000	1.8506e-33	0.0277503	107080000	107100000	0.98906
Higher LBS in Berkshire	4	107580000	107740000	4.12492e-10	0.058756	107580000	107600000	0.991237
Higher LBS in Berkshire	4	107580000	107740000	4.12492e-10	0.058756	107620000	107640000	0.993142
Higher LBS in Berkshire	4	107580000	107740000	4.12492e-10	0.058756	107640000	107660000	0.987947
Higher LBS in Berkshire	4	107580000	107740000	4.12492e-10	0.058756	107660000	107680000	0.985323
Higher LBS in Berkshire	4	107580000	107740000	4.12492e-10	0.058756	107680000	107700000	0.985567
Higher LBS in Berkshire	4	107580000	107740000	4.12492e-10	0.058756	107700000	107720000	0.989935
Higher LBS in Berkshire	4	107580000	107740000	4.12492e-10	0.058756	107720000	107740000	0.993538
Higher LBS in Berkshire	4	107580000	107740000	4.12492e-10	0.058756	107600000	107620000	0.991243
Higher LBS in Berkshire	4	110340000	110500000	1.09625e-17	0.0829347	110340000	110360000	0.984764
Higher LBS in Berkshire	4	110340000	110500000	1.09625e-17	0.0829347	110380000	110400000	0.992607
Higher LBS in Berkshire	4	110340000	110500000	1.09625e-17	0.0829347	110400000	110420000	0.992365
Higher LBS in Berkshire	4	110340000	110500000	1.09625e-17	0.0829347	110420000	110440000	0.99688
Higher LBS in Berkshire	4	110340000	110500000	1.09625e-17	0.0829347	110440000	110460000	0.996929
Higher LBS in Berkshire	4	110340000	110500000	1.09625e-17	0.0829347	110460000	110480000	0.994079
Higher LBS in Berkshire	4	110340000	110500000	1.09625e-17	0.0829347	110360000	110380000	0.991387
Higher LBS in Berkshire	4	110340000	110500000	1.09625e-17	0.0829347	110480000	110500000	0.994847
Higher LBS in Berkshire	4	110760000	110820000	2.46897e-12	0.0424342	110760000	110780000	0.992258
Higher LBS in Berkshire	4	110760000	110820000	2.46897e-12	0.0424342	110780000	110800000	0.99446
Higher LBS in Berkshire	4	110760000	110820000	2.46897e-12	0.0424342	110800000	110820000	0.993537
Higher LBS in Berkshire	4	115220000	115360000	6.74296e-06	0.155917	115220000	115240000	0.999631
Higher LBS in Berkshire	4	115220000	115360000	6.74296e-06	0.155917	115240000	115260000	0.999772
Higher LBS in Berkshire	4	115220000	115360000	6.74296e-06	0.155917	115260000	115280000	0.993528
Higher LBS in Berkshire	4	115220000	115360000	6.74296e-06	0.155917	115280000	115300000	0.994544
Higher LBS in Berkshire	4	115220000	115360000	6.74296e-06	0.155917	115300000	115320000	0.993475
Higher LBS in Berkshire	4	115220000	115360000	6.74296e-06	0.155917	115320000	115340000	0.993067
Higher LBS in Berkshire	4	115220000	115360000	6.74296e-06	0.155917	115340000	115360000	0.996867
Higher LBS in Berkshire	4	122620000	122740000	0.00677273	0.0420554	122620000	122640000	0.980955
Higher LBS in Berkshire	4	122620000	122740000	0.00677273	0.0420554	122640000	122660000	0.986514
Higher LBS in Berkshire	4	122620000	122740000	0.00677273	0.0420554	122660000	122680000	0.985008
Higher LBS in Berkshire	4	122620000	122740000	0.00677273	0.0420554	122700000	122720000	0.988726
Higher LBS in Berkshire	4	122620000	122740000	0.00677273	0.0420554	122720000	122740000	0.982416
Higher LBS in Berkshire	4	122620000	122740000	0.00677273	0.0420554	122680000	122700000	0.984083
Higher LBS in Berkshire	4	126420000	126740000	1.43615e-15	0.134531	126420000	126440000	0.988177
Higher LBS in Berkshire	4	126420000	126740000	1.43615e-15	0.134531	126440000	126460000	0.987809
Higher LBS in Berkshire	4	126420000	126740000	1.43615e-15	0.134531	126460000	126480000	0.987948
Higher LBS in Berkshire	4	126420000	126740000	1.43615e-15	0.134531	126500000	126520000	0.988203
Higher LBS in Berkshire	4	126420000	126740000	1.43615e-15	0.134531	126520000	126540000	0.988608
Higher LBS in Berkshire	4	126420000	126740000	1.43615e-15	0.134531	126540000	126560000	0.991436
Higher LBS in Berkshire	4	126420000	126740000	1.43615e-15	0.134531	126560000	126580000	0.990308
Higher LBS in Berkshire	4	126420000	126740000	1.43615e-15	0.134531	126580000	126600000	0.99226
Higher LBS in Berkshire	4	126420000	126740000	1.43615e-15	0.134531	126620000	126640000	0.983947
Higher LBS in Berkshire	4	126420000	126740000	1.43615e-15	0.134531	126640000	126660000	0.983939
Higher LBS in Berkshire	4	126420000	126740000	1.43615e-15	0.134531	126660000	126680000	0.989669
Higher LBS in Berkshire	4	126420000	126740000	1.43615e-15	0.134531	126680000	126700000	0.992198
Higher LBS in Berkshire	4	126420000	126740000	1.43615e-15	0.134531	126700000	126720000	0.991213
Higher LBS in Berkshire	4	126420000	126740000	1.43615e-15	0.134531	126720000	126740000	0.986305
Higher LBS in Berkshire	4	126420000	126740000	1.43615e-15	0.134531	126480000	126500000	0.991351
Higher LBS in Berkshire	4	126420000	126740000	1.43615e-15	0.134531	126600000	126620000	0.987989
Higher LBS in Berkshire	5	1000000	1080000	0.00948275	0.0753824	1000000	1020000	0.990267
Higher LBS in Berkshire	5	1000000	1080000	0.00948275	0.0753824	1020000	1040000	0.977457
Higher LBS in Berkshire	5	1000000	1080000	0.00948275	0.0753824	1060000	1080000	0.979438
Higher LBS in Berkshire	5	1000000	1080000	0.00948275	0.0753824	1040000	1060000	0.983353
Higher LBS in Berkshire	5	2480000	2600000	3.57758e-08	0.0525615	2500000	2520000	0.981952
Higher LBS in Berkshire	5	2480000	2600000	3.57758e-08	0.0525615	2520000	2540000	0.979802
Higher LBS in Berkshire	5	2480000	2600000	3.57758e-08	0.0525615	2540000	2560000	0.986464
Higher LBS in Berkshire	5	2480000	2600000	3.57758e-08	0.0525615	2560000	2580000	0.981921
Higher LBS in Berkshire	5	2480000	2600000	3.57758e-08	0.0525615	2580000	2600000	0.980958
Higher LBS in Berkshire	5	2480000	2600000	3.57758e-08	0.0525615	2480000	2500000	0.986057
Higher LBS in Berkshire	5	3040000	3240000	1.40945e-10	0.0884983	3040000	3060000	0.999045
Higher LBS in Berkshire	5	3040000	3240000	1.40945e-10	0.0884983	3060000	3080000	1
Higher LBS in Berkshire	5	3040000	3240000	1.40945e-10	0.0884983	3080000	3100000	1
Higher LBS in Berkshire	5	3040000	3240000	1.40945e-10	0.0884983	3100000	3120000	0.9994
Higher LBS in Berkshire	5	3040000	3240000	1.40945e-10	0.0884983	3120000	3140000	0.9916
Higher LBS in Berkshire	5	3040000	3240000	1.40945e-10	0.0884983	3160000	3180000	0.984135
Higher LBS in Berkshire	5	3040000	3240000	1.40945e-10	0.0884983	3180000	3200000	0.982346
Higher LBS in Berkshire	5	3040000	3240000	1.40945e-10	0.0884983	3200000	3220000	0.98892
Higher LBS in Berkshire	5	3040000	3240000	1.40945e-10	0.0884983	3220000	3240000	0.983363
Higher LBS in Berkshire	5	3040000	3240000	1.40945e-10	0.0884983	3140000	3160000	0.982273
Higher LBS in Berkshire	5	4120000	4180000	1.59782e-06	0.0504698	4120000	4140000	0.980559
Higher LBS in Berkshire	5	4120000	4180000	1.59782e-06	0.0504698	4140000	4160000	0.988835
Higher LBS in Berkshire	5	4120000	4180000	1.59782e-06	0.0504698	4160000	4180000	0.98984
Higher LBS in Berkshire	5	4340000	4500000	7.14133e-13	0.0457655	4340000	4360000	0.985676
Higher LBS in Berkshire	5	4340000	4500000	7.14133e-13	0.0457655	4360000	4380000	0.98741
Higher LBS in Berkshire	5	4340000	4500000	7.14133e-13	0.0457655	4380000	4400000	0.986026
Higher LBS in Berkshire	5	4340000	4500000	7.14133e-13	0.0457655	4400000	4420000	0.982991
Higher LBS in Berkshire	5	4340000	4500000	7.14133e-13	0.0457655	4420000	4440000	0.984025
Higher LBS in Berkshire	5	4340000	4500000	7.14133e-13	0.0457655	4460000	4480000	0.982189
Higher LBS in Berkshire	5	4340000	4500000	7.14133e-13	0.0457655	4480000	4500000	0.985116
Higher LBS in Berkshire	5	4340000	4500000	7.14133e-13	0.0457655	4440000	4460000	0.984118
Higher LBS in Berkshire	5	6260000	6380000	0.00129558	0.0767371	6260000	6280000	0.986262
Higher LBS in Berkshire	5	6260000	6380000	0.00129558	0.0767371	6300000	6320000	0.987646
Higher LBS in Berkshire	5	6260000	6380000	0.00129558	0.0767371	6320000	6340000	0.984115
Higher LBS in Berkshire	5	6260000	6380000	0.00129558	0.0767371	6340000	6360000	0.986734
Higher LBS in Berkshire	5	6260000	6380000	0.00129558	0.0767371	6360000	6380000	0.987525
Higher LBS in Berkshire	5	6260000	6380000	0.00129558	0.0767371	6280000	6300000	0.985641
[truncated: 11,836 more rows]

## Sheet: Sheet 2 (Muscle)
Regions with differential LBS between breeds	Chromosome	Region start	Region end	P-value of LBS	ΔLBS (Berkshire – Tibetan)	Bin start	Bin end	Identity score
Higher LBS in Berkshire	1	7960000	8140000	0.033518	0.089434	7960000	7980000	0.984923
Higher LBS in Berkshire	1	7960000	8140000	0.033518	0.089434	8000000	8020000	0.986982
Higher LBS in Berkshire	1	7960000	8140000	0.033518	0.089434	8020000	8040000	0.982557
Higher LBS in Berkshire	1	7960000	8140000	0.033518	0.089434	8040000	8060000	0.987896
Higher LBS in Berkshire	1	7960000	8140000	0.033518	0.089434	8060000	8080000	0.985097
Higher LBS in Berkshire	1	7960000	8140000	0.033518	0.089434	8080000	8100000	0.984514
Higher LBS in Berkshire	1	7960000	8140000	0.033518	0.089434	8100000	8120000	0.985268
Higher LBS in Berkshire	1	7960000	8140000	0.033518	0.089434	7980000	8000000	0.990282
Higher LBS in Berkshire	1	7960000	8140000	0.033518	0.089434	8120000	8140000	0.986853
Higher LBS in Berkshire	1	11900000	11960000	0.0183883	0.0322848	11900000	11920000	0.983129
Higher LBS in Berkshire	1	11900000	11960000	0.0183883	0.0322848	11940000	11960000	0.987926
Higher LBS in Berkshire	1	11900000	11960000	0.0183883	0.0322848	11920000	11940000	0.986404
Higher LBS in Berkshire	1	12760000	13340000	0.0015827	0.102534	12760000	12780000	0.989644
Higher LBS in Berkshire	1	12760000	13340000	0.0015827	0.102534	12780000	12800000	0.988115
Higher LBS in Berkshire	1	12760000	13340000	0.0015827	0.102534	12800000	12820000	0.987651
Higher LBS in Berkshire	1	12760000	13340000	0.0015827	0.102534	12820000	12840000	0.980413
Higher LBS in Berkshire	1	12760000	13340000	0.0015827	0.102534	12860000	12880000	0.985
Higher LBS in Berkshire	1	12760000	13340000	0.0015827	0.102534	12880000	12900000	0.983819
Higher LBS in Berkshire	1	12760000	13340000	0.0015827	0.102534	12900000	12920000	0.983377
Higher LBS in Berkshire	1	12760000	13340000	0.0015827	0.102534	12920000	12940000	0.988492
Higher LBS in Berkshire	1	12760000	13340000	0.0015827	0.102534	12940000	12960000	0.986379
Higher LBS in Berkshire	1	12760000	13340000	0.0015827	0.102534	12980000	13000000	0.98208
Higher LBS in Berkshire	1	12760000	13340000	0.0015827	0.102534	13000000	13020000	0.986881
Higher LBS in Berkshire	1	12760000	13340000	0.0015827	0.102534	13020000	13040000	0.990103
Higher LBS in Berkshire	1	12760000	13340000	0.0015827	0.102534	13040000	13060000	0.985992
Higher LBS in Berkshire	1	12760000	13340000	0.0015827	0.102534	13060000	13080000	0.9893
Higher LBS in Berkshire	1	12760000	13340000	0.0015827	0.102534	13080000	13100000	0.983811
Higher LBS in Berkshire	1	12760000	13340000	0.0015827	0.102534	13120000	13140000	0.985675
Higher LBS in Berkshire	1	12760000	13340000	0.0015827	0.102534	13140000	13160000	0.983314
Higher LBS in Berkshire	1	12760000	13340000	0.0015827	0.102534	13160000	13180000	0.985628
Higher LBS in Berkshire	1	12760000	13340000	0.0015827	0.102534	13180000	13200000	0.983285
Higher LBS in Berkshire	1	12760000	13340000	0.0015827	0.102534	13200000	13220000	0.987269
Higher LBS in Berkshire	1	12760000	13340000	0.0015827	0.102534	13240000	13260000	0.976439
Higher LBS in Berkshire	1	12760000	13340000	0.0015827	0.102534	13260000	13280000	0.983361
Higher LBS in Berkshire	1	12760000	13340000	0.0015827	0.102534	13280000	13300000	0.985211
Higher LBS in Berkshire	1	12760000	13340000	0.0015827	0.102534	13300000	13320000	0.989321
Higher LBS in Berkshire	1	12760000	13340000	0.0015827	0.102534	13320000	13340000	0.990044
Higher LBS in Berkshire	1	12760000	13340000	0.0015827	0.102534	12840000	12860000	0.981388
Higher LBS in Berkshire	1	12760000	13340000	0.0015827	0.102534	12960000	12980000	0.985491
Higher LBS in Berkshire	1	12760000	13340000	0.0015827	0.102534	13100000	13120000	0.981313
Higher LBS in Berkshire	1	12760000	13340000	0.0015827	0.102534	13220000	13240000	0.97979
Higher LBS in Berkshire	1	21240000	21360000	0.0255338	0.115075	21240000	21260000	0.995696
Higher LBS in Berkshire	1	21240000	21360000	0.0255338	0.115075	21260000	21280000	0.995033
Higher LBS in Berkshire	1	21240000	21360000	0.0255338	0.115075	21280000	21300000	0.994459
Higher LBS in Berkshire	1	21240000	21360000	0.0255338	0.115075	21300000	21320000	0.996853
Higher LBS in Berkshire	1	21240000	21360000	0.0255338	0.115075	21320000	21340000	0.996329
Higher LBS in Berkshire	1	21240000	21360000	0.0255338	0.115075	21340000	21360000	0.993758
Higher LBS in Berkshire	1	23020000	23300000	0.0257546	0.140228	23020000	23040000	0.991421
Higher LBS in Berkshire	1	23020000	23300000	0.0257546	0.140228	23040000	23060000	0.994928
Higher LBS in Berkshire	1	23020000	23300000	0.0257546	0.140228	23080000	23100000	0.993779
Higher LBS in Berkshire	1	23020000	23300000	0.0257546	0.140228	23100000	23120000	0.99587
Higher LBS in Berkshire	1	23020000	23300000	0.0257546	0.140228	23120000	23140000	0.993624
Higher LBS in Berkshire	1	23020000	23300000	0.0257546	0.140228	23140000	23160000	0.993181
Higher LBS in Berkshire	1	23020000	23300000	0.0257546	0.140228	23160000	23180000	0.992665
Higher LBS in Berkshire	1	23020000	23300000	0.0257546	0.140228	23200000	23220000	0.995068
Higher LBS in Berkshire	1	23020000	23300000	0.0257546	0.140228	23220000	23240000	0.992953
Higher LBS in Berkshire	1	23020000	23300000	0.0257546	0.140228	23240000	23260000	0.993998
Higher LBS in Berkshire	1	23020000	23300000	0.0257546	0.140228	23260000	23280000	0.995751
Higher LBS in Berkshire	1	23020000	23300000	0.0257546	0.140228	23280000	23300000	0.992728
Higher LBS in Berkshire	1	23020000	23300000	0.0257546	0.140228	23180000	23200000	0.995818
Higher LBS in Berkshire	1	23020000	23300000	0.0257546	0.140228	23060000	23080000	0.988206
Higher LBS in Berkshire	1	24120000	24220000	0.02903	0.0429929	24120000	24140000	0.99435
Higher LBS in Berkshire	1	24120000	24220000	0.02903	0.0429929	24140000	24160000	0.996788
Higher LBS in Berkshire	1	24120000	24220000	0.02903	0.0429929	24160000	24180000	0.996965
Higher LBS in Berkshire	1	24120000	24220000	0.02903	0.0429929	24180000	24200000	0.993021
Higher LBS in Berkshire	1	24120000	24220000	0.02903	0.0429929	24200000	24220000	0.990802
Higher LBS in Berkshire	1	26940000	27020000	0.00828475	0.0435173	26940000	26960000	0.993181
Higher LBS in Berkshire	1	26940000	27020000	0.00828475	0.0435173	26960000	26980000	0.985432
Higher LBS in Berkshire	1	26940000	27020000	0.00828475	0.0435173	26980000	27000000	0.989117
Higher LBS in Berkshire	1	26940000	27020000	0.00828475	0.0435173	27000000	27020000	0.987657
Higher LBS in Berkshire	1	33960000	34020000	0.00950518	0.0459377	33960000	33980000	0.991712
Higher LBS in Berkshire	1	33960000	34020000	0.00950518	0.0459377	33980000	34000000	0.994744
Higher LBS in Berkshire	1	33960000	34020000	0.00950518	0.0459377	34000000	34020000	0.995679
Higher LBS in Berkshire	1	34220000	34320000	0.0141371	0.0285956	34220000	34240000	0.993539
Higher LBS in Berkshire	1	34220000	34320000	0.0141371	0.0285956	34240000	34260000	0.991987
Higher LBS in Berkshire	1	34220000	34320000	0.0141371	0.0285956	34260000	34280000	0.995491
Higher LBS in Berkshire	1	34220000	34320000	0.0141371	0.0285956	34280000	34300000	0.995073
Higher LBS in Berkshire	1	34220000	34320000	0.0141371	0.0285956	34300000	34320000	0.991111
Higher LBS in Berkshire	1	45660000	45720000	0.0342073	0.0787877	45660000	45680000	0.993201
Higher LBS in Berkshire	1	45660000	45720000	0.0342073	0.0787877	45680000	45700000	0.992938
Higher LBS in Berkshire	1	45660000	45720000	0.0342073	0.0787877	45700000	45720000	0.988377
Higher LBS in Berkshire	1	48980000	49180000	0.0110069	0.0840696	48980000	49000000	0.996505
Higher LBS in Berkshire	1	48980000	49180000	0.0110069	0.0840696	49000000	49020000	0.995797
Higher LBS in Berkshire	1	48980000	49180000	0.0110069	0.0840696	49040000	49060000	0.993245
Higher LBS in Berkshire	1	48980000	49180000	0.0110069	0.0840696	49060000	49080000	0.994654
Higher LBS in Berkshire	1	48980000	49180000	0.0110069	0.0840696	49080000	49100000	0.99599
Higher LBS in Berkshire	1	48980000	49180000	0.0110069	0.0840696	49100000	49120000	0.996609
Higher LBS in Berkshire	1	48980000	49180000	0.0110069	0.0840696	49120000	49140000	0.991162
Higher LBS in Berkshire	1	48980000	49180000	0.0110069	0.0840696	49160000	49180000	0.996589
Higher LBS in Berkshire	1	48980000	49180000	0.0110069	0.0840696	49020000	49040000	0.993899
Higher LBS in Berkshire	1	48980000	49180000	0.0110069	0.0840696	49140000	49160000	0.990497
Higher LBS in Berkshire	1	50000000	50100000	0.00137208	0.0588556	50000000	50020000	0.991271
Higher LBS in Berkshire	1	50000000	50100000	0.00137208	0.0588556	50020000	50040000	0.992625
Higher LBS in Berkshire	1	50000000	50100000	0.00137208	0.0588556	50040000	50060000	0.99204
Higher LBS in Berkshire	1	50000000	50100000	0.00137208	0.0588556	50080000	50100000	0.994095
Higher LBS in Berkshire	1	50000000	50100000	0.00137208	0.0588556	50060000	50080000	0.992243
Higher LBS in Berkshire	1	63220000	63360000	0.00320918	0.0324057	63220000	63240000	0.994968
Higher LBS in Berkshire	1	63220000	63360000	0.00320918	0.0324057	63240000	63260000	0.993687
Higher LBS in Berkshire	1	63220000	63360000	0.00320918	0.0324057	63260000	63280000	0.995973
Higher LBS in Berkshire	1	63220000	63360000	0.00320918	0.0324057	63280000	63300000	0.996938
Higher LBS in Berkshire	1	63220000	63360000	0.00320918	0.0324057	63320000	63340000	0.994799
Higher LBS in Berkshire	1	63220000	63360000	0.00320918	0.0324057	63340000	63360000	0.996554
Higher LBS in Berkshire	1	63220000	63360000	0.00320918	0.0324057	63300000	63320000	0.998188
Higher LBS in Berkshire	1	72040000	72100000	0.033035	0.0697713	72040000	72060000	0.992409
Higher LBS in Berkshire	1	72040000	72100000	0.033035	0.0697713	72060000	72080000	0.993882
Higher LBS in Berkshire	1	72040000	72100000	0.033035	0.0697713	72080000	72100000	0.997159
Higher LBS in Berkshire	1	72680000	72740000	0.0129488	0.0460462	72680000	72700000	0.996505
Higher LBS in Berkshire	1	72680000	72740000	0.0129488	0.0460462	72700000	72720000	0.992937
Higher LBS in Berkshire	1	72680000	72740000	0.0129488	0.0460462	72720000	72740000	0.991004
Higher LBS in Berkshire	1	73800000	73860000	0.0209894	0.0392689	73800000	73820000	0.988048
Higher LBS in Berkshire	1	73800000	73860000	0.0209894	0.0392689	73820000	73840000	0.993256
Higher LBS in Berkshire	1	73800000	73860000	0.0209894	0.0392689	73840000	73860000	0.993941
Higher LBS in Berkshire	1	74040000	74180000	0.0369394	0.0422072	74060000	74080000	0.996827
Higher LBS in Berkshire	1	74040000	74180000	0.0369394	0.0422072	74080000	74100000	0.992756
Higher LBS in Berkshire	1	74040000	74180000	0.0369394	0.0422072	74100000	74120000	0.992611
Higher LBS in Berkshire	1	74040000	74180000	0.0369394	0.0422072	74120000	74140000	0.996164
Higher LBS in Berkshire	1	74040000	74180000	0.0369394	0.0422072	74140000	74160000	0.995203
Higher LBS in Berkshire	1	74040000	74180000	0.0369394	0.0422072	74160000	74180000	0.994476
Higher LBS in Berkshire	1	74040000	74180000	0.0369394	0.0422072	74040000	74060000	0.993746
Higher LBS in Berkshire	1	78120000	78260000	0.011469	0.0462875	78120000	78140000	0.994718
Higher LBS in Berkshire	1	78120000	78260000	0.011469	0.0462875	78140000	78160000	0.991477
Higher LBS in Berkshire	1	78120000	78260000	0.011469	0.0462875	78160000	78180000	0.996083
Higher LBS in Berkshire	1	78120000	78260000	0.011469	0.0462875	78180000	78200000	0.994205
Higher LBS in Berkshire	1	78120000	78260000	0.011469	0.0462875	78200000	78220000	0.995744
Higher LBS in Berkshire	1	78120000	78260000	0.011469	0.0462875	78220000	78240000	0.9987
Higher LBS in Berkshire	1	78120000	78260000	0.011469	0.0462875	78240000	78260000	0.996943
Higher LBS in Berkshire	1	81900000	82140000	0.000149481	0.12172	81900000	81920000	0.993808
Higher LBS in Berkshire	1	81900000	82140000	0.000149481	0.12172	81920000	81940000	0.984126
Higher LBS in Berkshire	1	81900000	82140000	0.000149481	0.12172	81940000	81960000	0.993846
Higher LBS in Berkshire	1	81900000	82140000	0.000149481	0.12172	81960000	81980000	0.994676
Higher LBS in Berkshire	1	81900000	82140000	0.000149481	0.12172	81980000	82000000	0.992153
Higher LBS in Berkshire	1	81900000	82140000	0.000149481	0.12172	82000000	82020000	0.995724
Higher LBS in Berkshire	1	81900000	82140000	0.000149481	0.12172	82020000	82040000	0.997234
Higher LBS in Berkshire	1	81900000	82140000	0.000149481	0.12172	82060000	82080000	0.996568
Higher LBS in Berkshire	1	81900000	82140000	0.000149481	0.12172	82080000	82100000	0.997028
Higher LBS in Berkshire	1	81900000	82140000	0.000149481	0.12172	82100000	82120000	0.997452
Higher LBS in Berkshire	1	81900000	82140000	0.000149481	0.12172	82120000	82140000	0.993594
Higher LBS in Berkshire	1	81900000	82140000	0.000149481	0.12172	82040000	82060000	0.997229
Higher LBS in Berkshire	1	94800000	95000000	0.00589251	0.0720302	94800000	94820000	0.993056
Higher LBS in Berkshire	1	94800000	95000000	0.00589251	0.0720302	94820000	94840000	0.991854
Higher LBS in Berkshire	1	94800000	95000000	0.00589251	0.0720302	94840000	94860000	0.996443
Higher LBS in Berkshire	1	94800000	95000000	0.00589251	0.0720302	94860000	94880000	0.996116
Higher LBS in Berkshire	1	94800000	95000000	0.00589251	0.0720302	94900000	94920000	0.991557
Higher LBS in Berkshire	1	94800000	95000000	0.00589251	0.0720302	94920000	94940000	0.995721
Higher LBS in Berkshire	1	94800000	95000000	0.00589251	0.0720302	94940000	94960000	0.993919
Higher LBS in Berkshire	1	94800000	95000000	0.00589251	0.0720302	94960000	94980000	0.995846
Higher LBS in Berkshire	1	94800000	95000000	0.00589251	0.0720302	94980000	95000000	0.994944
Higher LBS in Berkshire	1	94800000	95000000	0.00589251	0.0720302	94880000	94900000	0.995932
Higher LBS in Berkshire	1	103040000	103100000	0.0443585	0.093065	103040000	103060000	0.994239
Higher LBS in Berkshire	1	103040000	103100000	0.0443585	0.093065	103060000	103080000	0.998375
Higher LBS in Berkshire	1	103040000	103100000	0.0443585	0.093065	103080000	103100000	0.993136
Higher LBS in Berkshire	1	107020000	107200000	0.0119847	0.0772671	107020000	107040000	0.993773
Higher LBS in Berkshire	1	107020000	107200000	0.0119847	0.0772671	107040000	107060000	0.997188
Higher LBS in Berkshire	1	107020000	107200000	0.0119847	0.0772671	107060000	107080000	0.994234
Higher LBS in Berkshire	1	107020000	107200000	0.0119847	0.0772671	107100000	107120000	0.994232
Higher LBS in Berkshire	1	107020000	107200000	0.0119847	0.0772671	107120000	107140000	0.99393
Higher LBS in Berkshire	1	107020000	107200000	0.0119847	0.0772671	107140000	107160000	0.988562
Higher LBS in Berkshire	1	107020000	107200000	0.0119847	0.0772671	107160000	107180000	0.994291
Higher LBS in Berkshire	1	107020000	107200000	0.0119847	0.0772671	107180000	107200000	0.995304
Higher LBS in Berkshire	1	107020000	107200000	0.0119847	0.0772671	107080000	107100000	0.989615
Higher LBS in Berkshire	1	108020000	108100000	0.0132258	0.0488042	108020000	108040000	0.989866
Higher LBS in Berkshire	1	108020000	108100000	0.0132258	0.0488042	108040000	108060000	0.990572
Higher LBS in Berkshire	1	108020000	108100000	0.0132258	0.0488042	108060000	108080000	0.990966
Higher LBS in Berkshire	1	108020000	108100000	0.0132258	0.0488042	108080000	108100000	0.9911
Higher LBS in Berkshire	1	108760000	108840000	0.0313471	0.0736741	108760000	108780000	0.995065
Higher LBS in Berkshire	1	108760000	108840000	0.0313471	0.0736741	108800000	108820000	0.998214
Higher LBS in Berkshire	1	108760000	108840000	0.0313471	0.0736741	108820000	108840000	0.998651
Higher LBS in Berkshire	1	108760000	108840000	0.0313471	0.0736741	108780000	108800000	0.995362
Higher LBS in Berkshire	1	109760000	110040000	0.016196	0.0712177	109760000	109780000	0.989247
Higher LBS in Berkshire	1	109760000	110040000	0.016196	0.0712177	109780000	109800000	0.991412
Higher LBS in Berkshire	1	109760000	110040000	0.016196	0.0712177	109800000	109820000	0.991489
Higher LBS in Berkshire	1	109760000	110040000	0.016196	0.0712177	109840000	109860000	0.994706
Higher LBS in Berkshire	1	109760000	110040000	0.016196	0.0712177	109860000	109880000	0.993166
Higher LBS in Berkshire	1	109760000	110040000	0.016196	0.0712177	109880000	109900000	0.984423
Higher LBS in Berkshire	1	109760000	110040000	0.016196	0.0712177	109900000	109920000	0.986261
Higher LBS in Berkshire	1	109760000	110040000	0.016196	0.0712177	109920000	109940000	0.991569
Higher LBS in Berkshire	1	109760000	110040000	0.016196	0.0712177	109940000	109960000	0.998232
Higher LBS in Berkshire	1	109760000	110040000	0.016196	0.0712177	109980000	110000000	0.99417
Higher LBS in Berkshire	1	109760000	110040000	0.016196	0.0712177	110000000	110020000	0.992442
Higher LBS in Berkshire	1	109760000	110040000	0.016196	0.0712177	110020000	110040000	0.99709
Higher LBS in Berkshire	1	109760000	110040000	0.016196	0.0712177	109820000	109840000	0.991137
Higher LBS in Berkshire	1	109760000	110040000	0.016196	0.0712177	109960000	109980000	0.99805
Higher LBS in Berkshire	1	117140000	117300000	0.000121197	0.0467374	117140000	117160000	0.980772
Higher LBS in Berkshire	1	117140000	117300000	0.000121197	0.0467374	117180000	117200000	0.989302
Higher LBS in Berkshire	1	117140000	117300000	0.000121197	0.0467374	117200000	117220000	0.990584
Higher LBS in Berkshire	1	117140000	117300000	0.000121197	0.0467374	117220000	117240000	0.993863
Higher LBS in Berkshire	1	117140000	117300000	0.000121197	0.0467374	117240000	117260000	0.989067
Higher LBS in Berkshire	1	117140000	117300000	0.000121197	0.0467374	117260000	117280000	0.992231
Higher LBS in Berkshire	1	117140000	117300000	0.000121197	0.0467374	117280000	117300000	0.996689
Higher LBS in Berkshire	1	117140000	117300000	0.000121197	0.0467374	117160000	117180000	0.99011
Higher LBS in Berkshire	1	119380000	119440000	0.0194744	0.0412334	119380000	119400000	0.998175
Higher LBS in Berkshire	1	119380000	119440000	0.0194744	0.0412334	119420000	119440000	0.98547
Higher LBS in Berkshire	1	119380000	119440000	0.0194744	0.0412334	119400000	119420000	0.995675
Higher LBS in Berkshire	1	120640000	120760000	0.00338347	0.0945549	120640000	120660000	0.996457
Higher LBS in Berkshire	1	120640000	120760000	0.00338347	0.0945549	120660000	120680000	0.997163
Higher LBS in Berkshire	1	120640000	120760000	0.00338347	0.0945549	120680000	120700000	0.995865
Higher LBS in Berkshire	1	120640000	120760000	0.00338347	0.0945549	120720000	120740000	0.997819
Higher LBS in Berkshire	1	120640000	120760000	0.00338347	0.0945549	120740000	120760000	0.997232
Higher LBS in Berkshire	1	120640000	120760000	0.00338347	0.0945549	120700000	120720000	0.998681
Higher LBS in Berkshire	1	144340000	144440000	0.0304226	0.0812386	144340000	144360000	0.990396
Higher LBS in Berkshire	1	144340000	144440000	0.0304226	0.0812386	144360000	144380000	0.991044
Higher LBS in Berkshire	1	144340000	144440000	0.0304226	0.0812386	144380000	144400000	0.984002
Higher LBS in Berkshire	1	144340000	144440000	0.0304226	0.0812386	144400000	144420000	0.991916
Higher LBS in Berkshire	1	144340000	144440000	0.0304226	0.0812386	144420000	144440000	0.982916
Higher LBS in Berkshire	1	147320000	147460000	0.0174943	0.0677978	147340000	147360000	0.991339
Higher LBS in Berkshire	1	147320000	147460000	0.0174943	0.0677978	147360000	147380000	0.990705
Higher LBS in Berkshire	1	147320000	147460000	0.0174943	0.0677978	147380000	147400000	0.988651
Higher LBS in Berkshire	1	147320000	147460000	0.0174943	0.0677978	147400000	147420000	0.992416
Higher LBS in Berkshire	1	147320000	147460000	0.0174943	0.0677978	147420000	147440000	0.989468
Higher LBS in Berkshire	1	147320000	147460000	0.0174943	0.0677978	147320000	147340000	0.991422
Higher LBS in Berkshire	1	147320000	147460000	0.0174943	0.0677978	147440000	147460000	0.994979
Higher LBS in Berkshire	1	150940000	151000000	0.025256	0.106691	150940000	150960000	0.995746
Higher LBS in Berkshire	1	150940000	151000000	0.025256	0.106691	150960000	150980000	0.996822
Higher LBS in Berkshire	1	150940000	151000000	0.025256	0.106691	150980000	151000000	0.996388
Higher LBS in Berkshire	1	154680000	154760000	0.0453324	0.0501581	154680000	154700000	0.991762
Higher LBS in Berkshire	1	154680000	154760000	0.0453324	0.0501581	154700000	154720000	0.992621
Higher LBS in Berkshire	1	154680000	154760000	0.0453324	0.0501581	154720000	154740000	0.992552
Higher LBS in Berkshire	1	154680000	154760000	0.0453324	0.0501581	154740000	154760000	0.994652
Higher LBS in Berkshire	1	155840000	155900000	0.0257627	0.0466039	155860000	155880000	0.990768
Higher LBS in Berkshire	1	155840000	155900000	0.0257627	0.0466039	155880000	155900000	0.993706
Higher LBS in Berkshire	1	155840000	155900000	0.0257627	0.0466039	155840000	155860000	0.993491
Higher LBS in Berkshire	1	157100000	157160000	0.0245777	0.0492468	157100000	157120000	0.991282
Higher LBS in Berkshire	1	157100000	157160000	0.0245777	0.0492468	157120000	157140000	0.996527
Higher LBS in Berkshire	1	157100000	157160000	0.0245777	0.0492468	157140000	157160000	0.992137
Higher LBS in Berkshire	1	170880000	170980000	0.0309262	0.062425	170880000	170900000	0.991955
Higher LBS in Berkshire	1	170880000	170980000	0.0309262	0.062425	170920000	170940000	0.995234
Higher LBS in Berkshire	1	170880000	170980000	0.0309262	0.062425	170940000	170960000	0.992612
Higher LBS in Berkshire	1	170880000	170980000	0.0309262	0.062425	170960000	170980000	0.995363
Higher LBS in Berkshire	1	170880000	170980000	0.0309262	0.062425	170900000	170920000	0.992644
Higher LBS in Berkshire	1	175080000	175140000	0.0382755	0.0810713	175080000	175100000	0.996717
Higher LBS in Berkshire	1	175080000	175140000	0.0382755	0.0810713	175120000	175140000	0.9976
Higher LBS in Berkshire	1	175080000	175140000	0.0382755	0.0810713	175100000	175120000	0.998281
Higher LBS in Berkshire	1	180260000	180420000	0.0311507	0.0723169	180260000	180280000	0.997464
Higher LBS in Berkshire	1	180260000	180420000	0.0311507	0.0723169	180280000	180300000	0.995843
Higher LBS in Berkshire	1	180260000	180420000	0.0311507	0.0723169	180300000	180320000	0.997402
Higher LBS in Berkshire	1	180260000	180420000	0.0311507	0.0723169	180320000	180340000	0.996835
Higher LBS in Berkshire	1	180260000	180420000	0.0311507	0.0723169	180360000	180380000	0.996577
Higher LBS in Berkshire	1	180260000	180420000	0.0311507	0.0723169	180380000	180400000	0.998032
Higher LBS in Berkshire	1	180260000	180420000	0.0311507	0.0723169	180400000	180420000	0.9991
Higher LBS in Berkshire	1	180260000	180420000	0.0311507	0.0723169	180340000	180360000	0.994997
Higher LBS in Berkshire	1	201420000	201520000	0.0147832	0.125409	201420000	201440000	0.9996
Higher LBS in Berkshire	1	201420000	201520000	0.0147832	0.125409	201460000	201480000	0.999319
Higher LBS in Berkshire	1	201420000	201520000	0.0147832	0.125409	201480000	201500000	0.998388
Higher LBS in Berkshire	1	201420000	201520000	0.0147832	0.125409	201500000	201520000	0.996675
Higher LBS in Berkshire	1	201420000	201520000	0.0147832	0.125409	201440000	201460000	0.998975
Higher LBS in Berkshire	1	204260000	204420000	0.000937579	0.0835585	204260000	204280000	0.991917
Higher LBS in Berkshire	1	204260000	204420000	0.000937579	0.0835585	204280000	204300000	0.996715
Higher LBS in Berkshire	1	204260000	204420000	0.000937579	0.0835585	204300000	204320000	0.997621
Higher LBS in Berkshire	1	204260000	204420000	0.000937579	0.0835585	204320000	204340000	0.99538
Higher LBS in Berkshire	1	204260000	204420000	0.000937579	0.0835585	204360000	204380000	0.996641
Higher LBS in Berkshire	1	204260000	204420000	0.000937579	0.0835585	204380000	204400000	0.998338
Higher LBS in Berkshire	1	204260000	204420000	0.000937579	0.0835585	204400000	204420000	0.998188
Higher LBS in Berkshire	1	204260000	204420000	0.000937579	0.0835585	204340000	204360000	0.992565
Higher LBS in Berkshire	1	214920000	215020000	0.028518	0.0734363	214920000	214940000	0.994768
Higher LBS in Berkshire	1	214920000	215020000	0.028518	0.0734363	214960000	214980000	0.994579
Higher LBS in Berkshire	1	214920000	215020000	0.028518	0.0734363	214980000	215000000	0.993063
Higher LBS in Berkshire	1	214920000	215020000	0.028518	0.0734363	215000000	215020000	0.994972
Higher LBS in Berkshire	1	214920000	215020000	0.028518	0.0734363	214940000	214960000	0.992733
Higher LBS in Berkshire	1	217040000	217140000	0.0218292	0.0241834	217060000	217080000	0.999406
Higher LBS in Berkshire	1	217040000	217140000	0.0218292	0.0241834	217080000	217100000	0.9992
Higher LBS in Berkshire	1	217040000	217140000	0.0218292	0.0241834	217100000	217120000	0.999287
Higher LBS in Berkshire	1	217040000	217140000	0.0218292	0.0241834	217120000	217140000	0.995383
Higher LBS in Berkshire	1	217040000	217140000	0.0218292	0.0241834	217040000	217060000	0.9995
Higher LBS in Berkshire	1	219340000	219420000	0.0188757	0.069795	219340000	219360000	0.99604
Higher LBS in Berkshire	1	219340000	219420000	0.0188757	0.069795	219360000	219380000	0.991809
Higher LBS in Berkshire	1	219340000	219420000	0.0188757	0.069795	219380000	219400000	0.994388
Higher LBS in Berkshire	1	219340000	219420000	0.0188757	0.069795	219400000	219420000	0.996524
Higher LBS in Berkshire	1	236260000	236340000	0.00304985	0.0511195	236260000	236280000	0.994795
Higher LBS in Berkshire	1	236260000	236340000	0.00304985	0.0511195	236280000	236300000	0.99269
Higher LBS in Berkshire	1	236260000	236340000	0.00304985	0.0511195	236300000	236320000	0.996551
Higher LBS in Berkshire	1	236260000	236340000	0.00304985	0.0511195	236320000	236340000	0.991164
Higher LBS in Berkshire	1	237320000	237420000	0.015551	0.0637532	237320000	237340000	0.988357
Higher LBS in Berkshire	1	237320000	237420000	0.015551	0.0637532	237340000	237360000	0.99289
Higher LBS in Berkshire	1	237320000	237420000	0.015551	0.0637532	237380000	237400000	0.988161
Higher LBS in Berkshire	1	237320000	237420000	0.015551	0.0637532	237400000	237420000	0.98797
Higher LBS in Berkshire	1	237320000	237420000	0.015551	0.0637532	237360000	237380000	0.985297
Higher LBS in Berkshire	1	237980000	238040000	0.0315609	0.0390595	237980000	238000000	0.996837
Higher LBS in Berkshire	1	237980000	238040000	0.0315609	0.0390595	238000000	238020000	0.998138
Higher LBS in Berkshire	1	237980000	238040000	0.0315609	0.0390595	238020000	238040000	0.997704
Higher LBS in Berkshire	1	241840000	241900000	0.0350846	0.0493378	241840000	241860000	0.994423
Higher LBS in Berkshire	1	241840000	241900000	0.0350846	0.0493378	241860000	241880000	0.992944
Higher LBS in Berkshire	1	241840000	241900000	0.0350846	0.0493378	241880000	241900000	0.994621
Higher LBS in Berkshire	1	243280000	243340000	0.031949	0.0757594	243280000	243300000	0.988623
Higher LBS in Berkshire	1	243280000	243340000	0.031949	0.0757594	243300000	243320000	0.992553
Higher LBS in Berkshire	1	243280000	243340000	0.031949	0.0757594	243320000	243340000	0.990907
Higher LBS in Berkshire	1	249760000	249820000	0.0392965	0.0605319	249760000	249780000	0.98751
Higher LBS in Berkshire	1	249760000	249820000	0.0392965	0.0605319	249780000	249800000	0.994441
Higher LBS in Berkshire	1	249760000	249820000	0.0392965	0.0605319	249800000	249820000	0.994786
Higher LBS in Berkshire	1	254580000	254640000	0.0468128	0.0398172	254580000	254600000	0.984614
Higher LBS in Berkshire	1	254580000	254640000	0.0468128	0.0398172	254600000	254620000	0.988376
Higher LBS in Berkshire	1	254580000	254640000	0.0468128	0.0398172	254620000	254640000	0.988538
Higher LBS in Berkshire	1	255240000	255360000	0.00969337	0.0594664	255240000	255260000	0.986963
Higher LBS in Berkshire	1	255240000	255360000	0.00969337	0.0594664	255260000	255280000	0.991473
Higher LBS in Berkshire	1	255240000	255360000	0.00969337	0.0594664	255280000	255300000	0.990306
Higher LBS in Berkshire	1	255240000	255360000	0.00969337	0.0594664	255300000	255320000	0.992871
Higher LBS in Berkshire	1	255240000	255360000	0.00969337	0.0594664	255340000	255360000	0.993499
Higher LBS in Berkshire	1	255240000	255360000	0.00969337	0.0594664	255320000	255340000	0.995028
Higher LBS in Berkshire	1	258060000	258340000	0.00205555	0.0649072	258060000	258080000	0.994464
Higher LBS in Berkshire	1	258060000	258340000	0.00205555	0.0649072	258100000	258120000	0.99434
Higher LBS in Berkshire	1	258060000	258340000	0.00205555	0.0649072	258120000	258140000	0.99383
Higher LBS in Berkshire	1	258060000	258340000	0.00205555	0.0649072	258140000	258160000	0.988988
Higher LBS in Berkshire	1	258060000	258340000	0.00205555	0.0649072	258160000	258180000	0.992494
Higher LBS in Berkshire	1	258060000	258340000	0.00205555	0.0649072	258180000	258200000	0.99077
Higher LBS in Berkshire	1	258060000	258340000	0.00205555	0.0649072	258220000	258240000	0.988724
Higher LBS in Berkshire	1	258060000	258340000	0.00205555	0.0649072	258240000	258260000	0.990957
Higher LBS in Berkshire	1	258060000	258340000	0.00205555	0.0649072	258260000	258280000	0.98979
Higher LBS in Berkshire	1	258060000	258340000	0.00205555	0.0649072	258280000	258300000	0.994885
Higher LBS in Berkshire	1	258060000	258340000	0.00205555	0.0649072	258300000	258320000	0.991236
Higher LBS in Berkshire	1	258060000	258340000	0.00205555	0.0649072	258320000	258340000	0.98639
Higher LBS in Berkshire	1	258060000	258340000	0.00205555	0.0649072	258080000	258100000	0.993719
Higher LBS in Berkshire	1	258060000	258340000	0.00205555	0.0649072	258200000	258220000	0.988153
Higher LBS in Berkshire	1	259320000	259420000	0.0236629	0.0627511	259320000	259340000	0.991124
Higher LBS in Berkshire	1	259320000	259420000	0.0236629	0.0627511	259340000	259360000	0.994314
Higher LBS in Berkshire	1	259320000	259420000	0.0236629	0.0627511	259360000	259380000	0.99218
Higher LBS in Berkshire	1	259320000	259420000	0.0236629	0.0627511	259400000	259420000	0.992518
Higher LBS in Berkshire	1	259320000	259420000	0.0236629	0.0627511	259380000	259400000	0.990593
Higher LBS in Berkshire	1	259720000	259840000	0.0404148	0.135761	259720000	259740000	0.992042
Higher LBS in Berkshire	1	259720000	259840000	0.0404148	0.135761	259740000	259760000	0.994459
Higher LBS in Berkshire	1	259720000	259840000	0.0404148	0.135761	259760000	259780000	0.991708
Higher LBS in Berkshire	1	259720000	259840000	0.0404148	0.135761	259800000	259820000	0.994267
Higher LBS in Berkshire	1	259720000	259840000	0.0404148	0.135761	259820000	259840000	0.995018
Higher LBS in Berkshire	1	259720000	259840000	0.0404148	0.135761	259780000	259800000	0.987709
Higher LBS in Berkshire	1	261900000	262020000	0.0273176	0.0803468	261900000	261920000	0.986298
Higher LBS in Berkshire	1	261900000	262020000	0.0273176	0.0803468	261920000	261940000	0.987079
Higher LBS in Berkshire	1	261900000	262020000	0.0273176	0.0803468	261940000	261960000	0.988574
Higher LBS in Berkshire	1	261900000	262020000	0.0273176	0.0803468	261960000	261980000	0.996181
Higher LBS in Berkshire	1	261900000	262020000	0.0273176	0.0803468	261980000	262000000	1
Higher LBS in Berkshire	1	261900000	262020000	0.0273176	0.0803468	262000000	262020000	0.994686
Higher LBS in Berkshire	1	262260000	262360000	0.0155338	0.0572776	262280000	262300000	0.990332
Higher LBS in Berkshire	1	262260000	262360000	0.0155338	0.0572776	262300000	262320000	0.993811
Higher LBS in Berkshire	1	262260000	262360000	0.0155338	0.0572776	262320000	262340000	0.990545
Higher LBS in Berkshire	1	262260000	262360000	0.0155338	0.0572776	262340000	262360000	0.995354
Higher LBS in Berkshire	1	262260000	262360000	0.0155338	0.0572776	262260000	262280000	0.989441
Higher LBS in Berkshire	1	262920000	263040000	0.0298489	0.287151	262940000	262960000	0.990501
Higher LBS in Berkshire	1	262920000	263040000	0.0298489	0.287151	262960000	262980000	0.97608
Higher LBS in Berkshire	1	262920000	263040000	0.0298489	0.287151	262980000	263000000	0.979338
Higher LBS in Berkshire	1	262920000	263040000	0.0298489	0.287151	263000000	263020000	0.987975
Higher LBS in Berkshire	1	262920000	263040000	0.0298489	0.287151	263020000	263040000	0.985272
Higher LBS in Berkshire	1	262920000	263040000	0.0298489	0.287151	262920000	262940000	0.985757
Higher LBS in Berkshire	1	263480000	263700000	0.000913533	0.202473	263480000	263500000	0.986305
Higher LBS in Berkshire	1	263480000	263700000	0.000913533	0.202473	263500000	263520000	0.979625
Higher LBS in Berkshire	1	263480000	263700000	0.000913533	0.202473	263520000	263540000	0.978872
Higher LBS in Berkshire	1	263480000	263700000	0.000913533	0.202473	263540000	263560000	0.988985
Higher LBS in Berkshire	1	263480000	263700000	0.000913533	0.202473	263560000	263580000	0.978791
Higher LBS in Berkshire	1	263480000	263700000	0.000913533	0.202473	263600000	263620000	0.989091
Higher LBS in Berkshire	1	263480000	263700000	0.000913533	0.202473	263620000	263640000	0.989783
Higher LBS in Berkshire	1	263480000	263700000	0.000913533	0.202473	263640000	263660000	0.996746
Higher LBS in Berkshire	1	263480000	263700000	0.000913533	0.202473	263660000	263680000	0.985848
Higher LBS in Berkshire	1	263480000	263700000	0.000913533	0.202473	263680000	263700000	0.981326
Higher LBS in Berkshire	1	263480000	263700000	0.000913533	0.202473	263580000	263600000	0.986255
Higher LBS in Berkshire	1	267920000	268000000	0.0256898	0.0671089	267920000	267940000	0.985985
Higher LBS in Berkshire	1	267920000	268000000	0.0256898	0.0671089	267940000	267960000	0.99399
Higher LBS in Berkshire	1	267920000	268000000	0.0256898	0.0671089	267960000	267980000	0.982537
Higher LBS in Berkshire	1	267920000	268000000	0.0256898	0.0671089	267980000	268000000	0.985011
Higher LBS in Berkshire	1	269260000	269320000	0.0234021	0.0723141	269260000	269280000	0.986011
Higher LBS in Berkshire	1	269260000	269320000	0.0234021	0.0723141	269280000	269300000	0.986581
Higher LBS in Berkshire	1	269260000	269320000	0.0234021	0.0723141	269300000	269320000	0.990401
Higher LBS in Berkshire	2	2180000	2280000	0.0226694	0.113823	2180000	2200000	0.99795
Higher LBS in Berkshire	2	2180000	2280000	0.0226694	0.113823	2200000	2220000	0.985128
Higher LBS in Berkshire	2	2180000	2280000	0.0226694	0.113823	2240000	2260000	0.984257
Higher LBS in Berkshire	2	2180000	2280000	0.0226694	0.113823	2260000	2280000	0.986082
Higher LBS in Berkshire	2	2180000	2280000	0.0226694	0.113823	2220000	2240000	0.980656
Higher LBS in Berkshire	2	2740000	2820000	0.0360315	0.0828721	2760000	2780000	0.980082
Higher LBS in Berkshire	2	2740000	2820000	0.0360315	0.0828721	2780000	2800000	0.986243
Higher LBS in Berkshire	2	2740000	2820000	0.0360315	0.0828721	2800000	2820000	0.9851
Higher LBS in Berkshire	2	2740000	2820000	0.0360315	0.0828721	2740000	2760000	0.979589
Higher LBS in Berkshire	2	3520000	3600000	0.00982145	0.0507142	3540000	3560000	0.982392
Higher LBS in Berkshire	2	3520000	3600000	0.00982145	0.0507142	3560000	3580000	0.989231
Higher LBS in Berkshire	2	3520000	3600000	0.00982145	0.0507142	3580000	3600000	0.984517
Higher LBS in Berkshire	2	3520000	3600000	0.00982145	0.0507142	3520000	3540000	0.987585
Higher LBS in Berkshire	2	3640000	3700000	0.042629	0.0575491	3640000	3660000	0.988636
Higher LBS in Berkshire	2	3640000	3700000	0.042629	0.0575491	3680000	3700000	0.981331
Higher LBS in Berkshire	2	3640000	3700000	0.042629	0.0575491	3660000	3680000	0.984559
Higher LBS in Berkshire	2	4780000	4880000	0.0176457	0.0683288	4780000	4800000	0.987679
Higher LBS in Berkshire	2	4780000	4880000	0.0176457	0.0683288	4800000	4820000	0.984959
Higher LBS in Berkshire	2	4780000	4880000	0.0176457	0.0683288	4820000	4840000	0.983596
Higher LBS in Berkshire	2	4780000	4880000	0.0176457	0.0683288	4860000	4880000	0.983609
Higher LBS in Berkshire	2	4780000	4880000	0.0176457	0.0683288	4840000	4860000	0.987791
Higher LBS in Berkshire	2	5520000	5580000	0.0391202	0.0508408	5520000	5540000	0.988813
Higher LBS in Berkshire	2	5520000	5580000	0.0391202	0.0508408	5540000	5560000	0.992984
Higher LBS in Berkshire	2	5520000	5580000	0.0391202	0.0508408	5560000	5580000	0.992626
Higher LBS in Berkshire	2	5860000	5980000	0.00315534	0.0522642	5860000	5880000	0.987037
Higher LBS in Berkshire	2	5860000	5980000	0.00315534	0.0522642	5900000	5920000	0.986452
Higher LBS in Berkshire	2	5860000	5980000	0.00315534	0.0522642	5920000	5940000	0.988284
Higher LBS in Berkshire	2	5860000	5980000	0.00315534	0.0522642	5940000	5960000	0.99415
Higher LBS in Berkshire	2	5860000	5980000	0.00315534	0.0522642	5960000	5980000	0.98848
Higher LBS in Berkshire	2	5860000	5980000	0.00315534	0.0522642	5880000	5900000	0.98422
Higher LBS in Berkshire	2	13660000	13720000	0.0279826	0.342296	13660000	13680000	1
Higher LBS in Berkshire	2	13660000	13720000	0.0279826	0.342296	13680000	13700000	0.999919
Higher LBS in Berkshire	2	13660000	13720000	0.0279826	0.342296	13700000	13720000	0.997651
Higher LBS in Berkshire	2	25180000	25240000	0.0434404	0.0296353	25180000	25200000	0.99199
Higher LBS in Berkshire	2	25180000	25240000	0.0434404	0.0296353	25200000	25220000	0.984049
Higher LBS in Berkshire	2	25180000	25240000	0.0434404	0.0296353	25220000	25240000	0.985891
Higher LBS in Berkshire	2	27200000	27420000	0.000404067	0.0840414	27200000	27220000	0.987013
Higher LBS in Berkshire	2	27200000	27420000	0.000404067	0.0840414	27220000	27240000	0.980302
Higher LBS in Berkshire	2	27200000	27420000	0.000404067	0.0840414	27240000	27260000	0.981425
Higher LBS in Berkshire	2	27200000	27420000	0.000404067	0.0840414	27280000	27300000	0.981809
Higher LBS in Berkshire	2	27200000	27420000	0.000404067	0.0840414	27300000	27320000	0.987232
Higher LBS in Berkshire	2	27200000	27420000	0.000404067	0.0840414	27320000	27340000	0.984594
Higher LBS in Berkshire	2	27200000	27420000	0.000404067	0.0840414	27340000	27360000	0.989327
Higher LBS in Berkshire	2	27200000	27420000	0.000404067	0.0840414	27360000	27380000	0.988692
Higher LBS in Berkshire	2	27200000	27420000	0.000404067	0.0840414	27400000	27420000	0.995345
Higher LBS in Berkshire	2	27200000	27420000	0.000404067	0.0840414	27380000	27400000	0.989639
Higher LBS in Berkshire	2	27200000	27420000	0.000404067	0.0840414	27260000	27280000	0.983491
Higher LBS in Berkshire	2	31020000	31100000	0.0452026	0.0747285	31020000	31040000	0.994749
Higher LBS in Berkshire	2	31020000	31100000	0.0452026	0.0747285	31040000	31060000	0.997282
Higher LBS in Berkshire	2	31020000	31100000	0.0452026	0.0747285	31080000	31100000	0.98976
Higher LBS in Berkshire	2	31020000	31100000	0.0452026	0.0747285	31060000	31080000	0.992241
Higher LBS in Berkshire	2	35620000	35720000	0.01715	0.0575684	35620000	35640000	0.978275
Higher LBS in Berkshire	2	35620000	35720000	0.01715	0.0575684	35660000	35680000	0.994409
Higher LBS in Berkshire	2	35620000	35720000	0.01715	0.0575684	35680000	35700000	0.995146
Higher LBS in Berkshire	2	35620000	35720000	0.01715	0.0575684	35700000	35720000	0.99544
Higher LBS in Berkshire	2	35620000	35720000	0.01715	0.0575684	35640000	35660000	0.988747
Higher LBS in Berkshire	2	36240000	36340000	0.02082	0.107492	36240000	36260000	0.99588
Higher LBS in Berkshire	2	36240000	36340000	0.02082	0.107492	36260000	36280000	0.994776
Higher LBS in Berkshire	2	36240000	36340000	0.02082	0.107492	36280000	36300000	0.997576
Higher LBS in Berkshire	2	36240000	36340000	0.02082	0.107492	36320000	36340000	0.995976
Higher LBS in Berkshire	2	36240000	36340000	0.02082	0.107492	36300000	36320000	0.9984
Higher LBS in Berkshire	2	36600000	36680000	0.0258508	0.0827543	36600000	36620000	0.99048
Higher LBS in Berkshire	2	36600000	36680000	0.0258508	0.0827543	36620000	36640000	0.990663
Higher LBS in Berkshire	2	36600000	36680000	0.0258508	0.0827543	36640000	36660000	0.995684
Higher LBS in Berkshire	2	36600000	36680000	0.0258508	0.0827543	36660000	36680000	0.988348
Higher LBS in Berkshire	2	40260000	40380000	0.00987434	0.0853391	40260000	40280000	0.994284
Higher LBS in Berkshire	2	40260000	40380000	0.00987434	0.0853391	40280000	40300000	0.98457
Higher LBS in Berkshire	2	40260000	40380000	0.00987434	0.0853391	40300000	40320000	0.993664
Higher LBS in Berkshire	2	40260000	40380000	0.00987434	0.0853391	40320000	40340000	0.986527
Higher LBS in Berkshire	2	40260000	40380000	0.00987434	0.0853391	40340000	40360000	0.990321
Higher LBS in Berkshire	2	40260000	40380000	0.00987434	0.0853391	40360000	40380000	0.990567
Higher LBS in Berkshire	2	41880000	41940000	0.022274	0.0494593	41880000	41900000	0.996707
Higher LBS in Berkshire	2	41880000	41940000	0.022274	0.0494593	41900000	41920000	0.99739
Higher LBS in Berkshire	2	41880000	41940000	0.022274	0.0494593	41920000	41940000	0.99754
Higher LBS in Berkshire	2	47160000	47220000	0.00927592	0.033745	47160000	47180000	0.995143
Higher LBS in Berkshire	2	47160000	47220000	0.00927592	0.033745	47200000	47220000	0.993712
Higher LBS in Berkshire	2	47160000	47220000	0.00927592	0.033745	47180000	47200000	0.994789
Higher LBS in Berkshire	2	47480000	47560000	0.0444175	0.08755	47480000	47500000	0.99384
Higher LBS in Berkshire	2	47480000	47560000	0.0444175	0.08755	47500000	47520000	0.998264
Higher LBS in Berkshire	2	47480000	47560000	0.0444175	0.08755	47520000	47540000	0.996134
Higher LBS in Berkshire	2	47480000	47560000	0.0444175	0.08755	47540000	47560000	0.997429
Higher LBS in Berkshire	2	47840000	47920000	0.00976986	0.0722592	47860000	47880000	0.997728
Higher LBS in Berkshire	2	47840000	47920000	0.00976986	0.0722592	47880000	47900000	0.996713
Higher LBS in Berkshire	2	47840000	47920000	0.00976986	0.0722592	47900000	47920000	0.995783
Higher LBS in Berkshire	2	47840000	47920000	0.00976986	0.0722592	47840000	47860000	0.995609
Higher LBS in Berkshire	2	48680000	48780000	0.0068039	0.0851537	48680000	48700000	0.993049
Higher LBS in Berkshire	2	48680000	48780000	0.0068039	0.0851537	48700000	48720000	0.995111
Higher LBS in Berkshire	2	48680000	48780000	0.0068039	0.0851537	48720000	48740000	0.988417
Higher LBS in Berkshire	2	48680000	48780000	0.0068039	0.0851537	48760000	48780000	0.989657
Higher LBS in Berkshire	2	48680000	48780000	0.0068039	0.0851537	48740000	48760000	0.988603
Higher LBS in Berkshire	2	52360000	52480000	0.00520183	0.0858429	52360000	52380000	0.991678
Higher LBS in Berkshire	2	52360000	52480000	0.00520183	0.0858429	52380000	52400000	0.992869
Higher LBS in Berkshire	2	52360000	52480000	0.00520183	0.0858429	52400000	52420000	0.990681
Higher LBS in Berkshire	2	52360000	52480000	0.00520183	0.0858429	52440000	52460000	0.99624
Higher LBS in Berkshire	2	52360000	52480000	0.00520183	0.0858429	52460000	52480000	0.996458
Higher LBS in Berkshire	2	52360000	52480000	0.00520183	0.0858429	52420000	52440000	0.995045
Higher LBS in Berkshire	2	54400000	54460000	0.0311214	0.065638	54400000	54420000	0.991682
Higher LBS in Berkshire	2	54400000	54460000	0.0311214	0.065638	54420000	54440000	0.995041
Higher LBS in Berkshire	2	54400000	54460000	0.0311214	0.065638	54440000	54460000	0.961483
Higher LBS in Berkshire	2	55300000	55400000	0.0236984	0.110167	55320000	55340000	0.980888
Higher LBS in Berkshire	2	55300000	55400000	0.0236984	0.110167	55340000	55360000	0.985576
Higher LBS in Berkshire	2	55300000	55400000	0.0236984	0.110167	55360000	55380000	0.987097
Higher LBS in Berkshire	2	55300000	55400000	0.0236984	0.110167	55380000	55400000	0.989244
Higher LBS in Berkshire	2	55300000	55400000	0.0236984	0.110167	55300000	55320000	0.986344
Higher LBS in Berkshire	2	57640000	57880000	0.00182566	0.195768	57640000	57660000	0.998619
Higher LBS in Berkshire	2	57640000	57880000	0.00182566	0.195768	57680000	57700000	0.995377
Higher LBS in Berkshire	2	57640000	57880000	0.00182566	0.195768	57700000	57720000	0.990627
Higher LBS in Berkshire	2	57640000	57880000	0.00182566	0.195768	57720000	57740000	0.994848
Higher LBS in Berkshire	2	57640000	57880000	0.00182566	0.195768	57740000	57760000	0.997938
Higher LBS in Berkshire	2	57640000	57880000	0.00182566	0.195768	57760000	57780000	0.998432
Higher LBS in Berkshire	2	57640000	57880000	0.00182566	0.195768	57780000	57800000	0.997264
Higher LBS in Berkshire	2	57640000	57880000	0.00182566	0.195768	57820000	57840000	0.997396
Higher LBS in Berkshire	2	57640000	57880000	0.00182566	0.195768	57840000	57860000	0.996564
Higher LBS in Berkshire	2	57640000	57880000	0.00182566	0.195768	57860000	57880000	0.997652
Higher LBS in Berkshire	2	57640000	57880000	0.00182566	0.195768	57800000	57820000	0.998126
Higher LBS in Berkshire	2	57640000	57880000	0.00182566	0.195768	57660000	57680000	0.999981
Higher LBS in Berkshire	2	61060000	61300000	0.010626	0.0595854	61080000	61100000	0.996895
Higher LBS in Berkshire	2	61060000	61300000	0.010626	0.0595854	61100000	61120000	0.994017
Higher LBS in Berkshire	2	61060000	61300000	0.010626	0.0595854	61120000	61140000	0.996678
Higher LBS in Berkshire	2	61060000	61300000	0.010626	0.0595854	61140000	61160000	0.997776
Higher LBS in Berkshire	2	61060000	61300000	0.010626	0.0595854	61160000	61180000	0.996355
Higher LBS in Berkshire	2	61060000	61300000	0.010626	0.0595854	61180000	61200000	0.997232
Higher LBS in Berkshire	2	61060000	61300000	0.010626	0.0595854	61220000	61240000	0.998238
Higher LBS in Berkshire	2	61060000	61300000	0.010626	0.0595854	61240000	61260000	0.997814
Higher LBS in Berkshire	2	61060000	61300000	0.010626	0.0595854	61260000	61280000	0.997559
Higher LBS in Berkshire	2	61060000	61300000	0.010626	0.0595854	61280000	61300000	0.997247
Higher LBS in Berkshire	2	61060000	61300000	0.010626	0.0595854	61060000	61080000	0.996901
Higher LBS in Berkshire	2	61060000	61300000	0.010626	0.0595854	61200000	61220000	0.997602
Higher LBS in Berkshire	2	61980000	62080000	0.0112772	0.501916	62000000	62020000	1
Higher LBS in Berkshire	2	61980000	62080000	0.0112772	0.501916	62020000	62040000	0.999275
Higher LBS in Berkshire	2	61980000	62080000	0.0112772	0.501916	62040000	62060000	0.997726
Higher LBS in Berkshire	2	61980000	62080000	0.0112772	0.501916	62060000	62080000	0.992084
Higher LBS in Berkshire	2	61980000	62080000	0.0112772	0.501916	61980000	62000000	0.998775
Higher LBS in Berkshire	2	63340000	63540000	0.0167987	0.117699	63340000	63360000	0.995065
Higher LBS in Berkshire	2	63340000	63540000	0.0167987	0.117699	63360000	63380000	0.996239
Higher LBS in Berkshire	2	63340000	63540000	0.0167987	0.117699	63380000	63400000	0.997314
Higher LBS in Berkshire	2	63340000	63540000	0.0167987	0.117699	63400000	63420000	0.995951
Higher LBS in Berkshire	2	63340000	63540000	0.0167987	0.117699	63440000	63460000	0.996058
Higher LBS in Berkshire	2	63340000	63540000	0.0167987	0.117699	63460000	63480000	0.998713
Higher LBS in Berkshire	2	63340000	63540000	0.0167987	0.117699	63480000	63500000	0.994667
Higher LBS in Berkshire	2	63340000	63540000	0.0167987	0.117699	63500000	63520000	0.99679
Higher LBS in Berkshire	2	63340000	63540000	0.0167987	0.117699	63520000	63540000	0.998263
Higher LBS in Berkshire	2	63340000	63540000	0.0167987	0.117699	63420000	63440000	0.995686
Higher LBS in Berkshire	2	63680000	63780000	0.0339508	0.295003	63680000	63700000	0.993725
Higher LBS in Berkshire	2	63680000	63780000	0.0339508	0.295003	63720000	63740000	0.996702
Higher LBS in Berkshire	2	63680000	63780000	0.0339508	0.295003	63740000	63760000	0.9991
Higher LBS in Berkshire	2	63680000	63780000	0.0339508	0.295003	63760000	63780000	0.999056
Higher LBS in Berkshire	2	63680000	63780000	0.0339508	0.295003	63700000	63720000	0.996076
Higher LBS in Berkshire	2	71100000	71200000	0.0252523	0.0422305	71100000	71120000	0.996896
Higher LBS in Berkshire	2	71100000	71200000	0.0252523	0.0422305	71120000	71140000	0.996808
Higher LBS in Berkshire	2	71100000	71200000	0.0252523	0.0422305	71140000	71160000	0.993656
Higher LBS in Berkshire	2	71100000	71200000	0.0252523	0.0422305	71180000	71200000	0.995234
Higher LBS in Berkshire	2	71100000	71200000	0.0252523	0.0422305	71160000	71180000	0.997919
Higher LBS in Berkshire	2	71980000	72100000	0.0049738	0.340494	71980000	72000000	0.998975
Higher LBS in Berkshire	2	71980000	72100000	0.0049738	0.340494	72000000	72020000	0.999212
Higher LBS in Berkshire	2	71980000	72100000	0.0049738	0.340494	72020000	72040000	0.999325
Higher LBS in Berkshire	2	71980000	72100000	0.0049738	0.340494	72040000	72060000	0.999431
Higher LBS in Berkshire	2	71980000	72100000	0.0049738	0.340494	72060000	72080000	0.998925
Higher LBS in Berkshire	2	71980000	72100000	0.0049738	0.340494	72080000	72100000	0.999375
Higher LBS in Berkshire	2	73120000	73260000	0.0231063	0.0609957	73140000	73160000	0.995918
Higher LBS in Berkshire	2	73120000	73260000	0.0231063	0.0609957	73160000	73180000	0.996664
Higher LBS in Berkshire	2	73120000	73260000	0.0231063	0.0609957	73180000	73200000	0.996463
Higher LBS in Berkshire	2	73120000	73260000	0.0231063	0.0609957	73200000	73220000	0.99221
Higher LBS in Berkshire	2	73120000	73260000	0.0231063	0.0609957	73220000	73240000	0.984918
Higher LBS in Berkshire	2	73120000	73260000	0.0231063	0.0609957	73240000	73260000	0.991253
Higher LBS in Berkshire	2	73120000	73260000	0.0231063	0.0609957	73120000	73140000	0.998613
Higher LBS in Berkshire	2	73300000	73360000	0.0414759	0.0668744	73300000	73320000	0.998438
Higher LBS in Berkshire	2	73300000	73360000	0.0414759	0.0668744	73320000	73340000	0.997988
Higher LBS in Berkshire	2	73300000	73360000	0.0414759	0.0668744	73340000	73360000	0.997508
Higher LBS in Berkshire	2	76240000	76320000	0.0222604	0.067804	76240000	76260000	0.996588
Higher LBS in Berkshire	2	76240000	76320000	0.0222604	0.067804	76260000	76280000	0.998382
Higher LBS in Berkshire	2	76240000	76320000	0.0222604	0.067804	76300000	76320000	0.995596
Higher LBS in Berkshire	2	76240000	76320000	0.0222604	0.067804	76280000	76300000	0.996304
Higher LBS in Berkshire	2	79760000	79820000	0.00506067	0.0435214	79760000	79780000	0.996835
Higher LBS in Berkshire	2	79760000	79820000	0.00506067	0.0435214	79780000	79800000	0.994348
Higher LBS in Berkshire	2	79760000	79820000	0.00506067	0.0435214	79800000	79820000	0.992928
Higher LBS in Berkshire	2	82920000	82980000	0.000415228	0.0233826	82920000	82940000	0.990184
Higher LBS in Berkshire	2	82920000	82980000	0.000415228	0.0233826	82940000	82960000	0.988497
Higher LBS in Berkshire	2	82920000	82980000	0.000415228	0.0233826	82960000	82980000	0.990776
Higher LBS in Berkshire	2	83380000	83480000	0.0255266	0.0305186	83380000	83400000	0.994804
Higher LBS in Berkshire	2	83380000	83480000	0.0255266	0.0305186	83400000	83420000	0.993984
Higher LBS in Berkshire	2	83380000	83480000	0.0255266	0.0305186	83420000	83440000	0.996779
Higher LBS in Berkshire	2	83380000	83480000	0.0255266	0.0305186	83440000	83460000	0.995153
Higher LBS in Berkshire	2	83380000	83480000	0.0255266	0.0305186	83460000	83480000	0.996078
Higher LBS in Berkshire	2	91140000	91200000	0.0211322	0.0479834	91140000	91160000	0.994611
Higher LBS in Berkshire	2	91140000	91200000	0.0211322	0.0479834	91160000	91180000	0.994699
Higher LBS in Berkshire	2	91140000	91200000	0.0211322	0.0479834	91180000	91200000	0.992179
Higher LBS in Berkshire	2	95080000	95140000	0.0362872	0.0999496	95080000	95100000	0.997301
Higher LBS in Berkshire	2	95080000	95140000	0.0362872	0.0999496	95100000	95120000	0.99775
Higher LBS in Berkshire	2	95080000	95140000	0.0362872	0.0999496	95120000	95140000	0.997651
Higher LBS in Berkshire	2	103620000	103700000	0.0399439	0.0465677	103620000	103640000	0.992674
Higher LBS in Berkshire	2	103620000	103700000	0.0399439	0.0465677	103640000	103660000	0.994021
Higher LBS in Berkshire	2	103620000	103700000	0.0399439	0.0465677	103680000	103700000	0.998409
Higher LBS in Berkshire	2	103620000	103700000	0.0399439	0.0465677	103660000	103680000	0.996023
Higher LBS in Berkshire	2	116560000	116740000	0.0173509	0.152516	116560000	116580000	0.995708
Higher LBS in Berkshire	2	116560000	116740000	0.0173509	0.152516	116580000	116600000	0.987419
Higher LBS in Berkshire	2	116560000	116740000	0.0173509	0.152516	116600000	116620000	0.983482
Higher LBS in Berkshire	2	116560000	116740000	0.0173509	0.152516	116620000	116640000	0.987078
Higher LBS in Berkshire	2	116560000	116740000	0.0173509	0.152516	116660000	116680000	0.980684
Higher LBS in Berkshire	2	116560000	116740000	0.0173509	0.152516	116680000	116700000	0.990979
Higher LBS in Berkshire	2	116560000	116740000	0.0173509	0.152516	116700000	116720000	0.988563
Higher LBS in Berkshire	2	116560000	116740000	0.0173509	0.152516	116720000	116740000	0.994116
Higher LBS in Berkshire	2	116560000	116740000	0.0173509	0.152516	116640000	116660000	0.98942
Higher LBS in Berkshire	2	117580000	117640000	0.0189246	0.029958	117580000	117600000	0.987728
Higher LBS in Berkshire	2	117580000	117640000	0.0189246	0.029958	117600000	117620000	0.984204
Higher LBS in Berkshire	2	117580000	117640000	0.0189246	0.029958	117620000	117640000	0.992572
Higher LBS in Berkshire	2	131100000	131180000	0.0365688	0.0785112	131100000	131120000	0.987907
Higher LBS in Berkshire	2	131100000	131180000	0.0365688	0.0785112	131120000	131140000	0.987674
Higher LBS in Berkshire	2	131100000	131180000	0.0365688	0.0785112	131140000	131160000	0.991659
Higher LBS in Berkshire	2	131100000	131180000	0.0365688	0.0785112	131160000	131180000	0.990657
Higher LBS in Berkshire	2	132000000	132060000	0.0289219	0.0714446	132000000	132020000	0.988944
Higher LBS in Berkshire	2	132000000	132060000	0.0289219	0.0714446	132020000	132040000	0.98652
Higher LBS in Berkshire	2	132000000	132060000	0.0289219	0.0714446	132040000	132060000	0.98391
Higher LBS in Berkshire	2	132320000	132380000	0.0433035	0.065042	132320000	132340000	0.987896
Higher LBS in Berkshire	2	132320000	132380000	0.0433035	0.065042	132340000	132360000	0.987194
Higher LBS in Berkshire	2	132320000	132380000	0.0433035	0.065042	132360000	132380000	0.985169
Higher LBS in Berkshire	2	133160000	133320000	0.0107945	0.0645827	133180000	133200000	0.985552
Higher LBS in Berkshire	2	133160000	133320000	0.0107945	0.0645827	133200000	133220000	0.986082
Higher LBS in Berkshire	2	133160000	133320000	0.0107945	0.0645827	133220000	133240000	0.990971
Higher LBS in Berkshire	2	133160000	133320000	0.0107945	0.0645827	133240000	133260000	0.986598
Higher LBS in Berkshire	2	133160000	133320000	0.0107945	0.0645827	133260000	133280000	0.983647
Higher LBS in Berkshire	2	133160000	133320000	0.0107945	0.0645827	133280000	133300000	0.984155
Higher LBS in Berkshire	2	133160000	133320000	0.0107945	0.0645827	133300000	133320000	0.985513
Higher LBS in Berkshire	2	133160000	133320000	0.0107945	0.0645827	133160000	133180000	0.991322
Higher LBS in Berkshire	2	136260000	136340000	0.0222935	0.102244	136260000	136280000	0.983675
Higher LBS in Berkshire	2	136260000	136340000	0.0222935	0.102244	136280000	136300000	0.997002
Higher LBS in Berkshire	2	136260000	136340000	0.0222935	0.102244	136320000	136340000	0.986875
Higher LBS in Berkshire	2	136260000	136340000	0.0222935	0.102244	136300000	136320000	0.989542
Higher LBS in Berkshire	2	138900000	138960000	0.0156522	0.0667424	138900000	138920000	0.989471
Higher LBS in Berkshire	2	138900000	138960000	0.0156522	0.0667424	138940000	138960000	0.988915
Higher LBS in Berkshire	2	138900000	138960000	0.0156522	0.0667424	138920000	138940000	0.988789
Higher LBS in Berkshire	2	139280000	139380000	0.0263322	0.0675876	139280000	139300000	0.986187
Higher LBS in Berkshire	2	139280000	139380000	0.0263322	0.0675876	139300000	139320000	0.99124
Higher LBS in Berkshire	2	139280000	139380000	0.0263322	0.0675876	139340000	139360000	0.990075
Higher LBS in Berkshire	2	139280000	139380000	0.0263322	0.0675876	139360000	139380000	0.987389
Higher LBS in Berkshire	2	139280000	139380000	0.0263322	0.0675876	139320000	139340000	0.987613
Higher LBS in Berkshire	2	141420000	141480000	0.0109314	0.0377832	141440000	141460000	0.997817
Higher LBS in Berkshire	2	141420000	141480000	0.0109314	0.0377832	141460000	141480000	0.99345
Higher LBS in Berkshire	2	141420000	141480000	0.0109314	0.0377832	141420000	141440000	0.9955
Higher LBS in Berkshire	2	144180000	144260000	0.030108	0.0280526	144180000	144200000	0.990553
Higher LBS in Berkshire	2	144180000	144260000	0.030108	0.0280526	144200000	144220000	0.987828
Higher LBS in Berkshire	2	144180000	144260000	0.030108	0.0280526	144220000	144240000	0.993759
Higher LBS in Berkshire	2	144180000	144260000	0.030108	0.0280526	144240000	144260000	0.983515
Higher LBS in Berkshire	2	144620000	144760000	0.00127573	0.0559322	144620000	144640000	0.990427
Higher LBS in Berkshire	2	144620000	144760000	0.00127573	0.0559322	144640000	144660000	0.989669
Higher LBS in Berkshire	2	144620000	144760000	0.00127573	0.0559322	144660000	144680000	0.986385
Higher LBS in Berkshire	2	144620000	144760000	0.00127573	0.0559322	144680000	144700000	0.98442
Higher LBS in Berkshire	2	144620000	144760000	0.00127573	0.0559322	144720000	144740000	0.983799
Higher LBS in Berkshire	2	144620000	144760000	0.00127573	0.0559322	144740000	144760000	0.986344
Higher LBS in Berkshire	2	144620000	144760000	0.00127573	0.0559322	144700000	144720000	0.982916
Higher LBS in Berkshire	2	149320000	149380000	0.00970117	0.0404432	149320000	149340000	0.989376
Higher LBS in Berkshire	2	149320000	149380000	0.00970117	0.0404432	149340000	149360000	0.987944
Higher LBS in Berkshire	2	149320000	149380000	0.00970117	0.0404432	149360000	149380000	0.991477
Higher LBS in Berkshire	3	1040000	1120000	0.0338112	0.0807666	1060000	1080000	0.987559
Higher LBS in Berkshire	3	1040000	1120000	0.0338112	0.0807666	1080000	1100000	0.987898
Higher LBS in Berkshire	3	1040000	1120000	0.0338112	0.0807666	1100000	1120000	0.991074
Higher LBS in Berkshire	3	1040000	1120000	0.0338112	0.0807666	1040000	1060000	0.989195
Higher LBS in Berkshire	3	8260000	8340000	0.0168402	0.0653956	8260000	8280000	0.996516
Higher LBS in Berkshire	3	8260000	8340000	0.0168402	0.0653956	8280000	8300000	0.993243
Higher LBS in Berkshire	3	8260000	8340000	0.0168402	0.0653956	8300000	8320000	0.993228
Higher LBS in Berkshire	3	8260000	8340000	0.0168402	0.0653956	8320000	8340000	0.990906
Higher LBS in Berkshire	3	16140000	16240000	0.0114808	0.0773794	16140000	16160000	0.98187
Higher LBS in Berkshire	3	16140000	16240000	0.0114808	0.0773794	16160000	16180000	0.98143
Higher LBS in Berkshire	3	16140000	16240000	0.0114808	0.0773794	16180000	16200000	0.985258
Higher LBS in Berkshire	3	16140000	16240000	0.0114808	0.0773794	16200000	16220000	0.982741
Higher LBS in Berkshire	3	16140000	16240000	0.0114808	0.0773794	16220000	16240000	0.982501
Higher LBS in Berkshire	3	19140000	19380000	0.00473296	0.125707	19140000	19160000	0.97923
Higher LBS in Berkshire	3	19140000	19380000	0.00473296	0.125707	19160000	19180000	0.994761
Higher LBS in Berkshire	3	19140000	19380000	0.00473296	0.125707	19180000	19200000	0.999981
Higher LBS in Berkshire	3	19140000	19380000	0.00473296	0.125707	19200000	19220000	0.999463
Higher LBS in Berkshire	3	19140000	19380000	0.00473296	0.125707	19220000	19240000	0.989274
Higher LBS in Berkshire	3	19140000	19380000	0.00473296	0.125707	19240000	19260000	0.981415
Higher LBS in Berkshire	3	19140000	19380000	0.00473296	0.125707	19280000	19300000	0.985088
Higher LBS in Berkshire	3	19140000	19380000	0.00473296	0.125707	19300000	19320000	0.98704
Higher LBS in Berkshire	3	19140000	19380000	0.00473296	0.125707	19320000	19340000	0.987084
Higher LBS in Berkshire	3	19140000	19380000	0.00473296	0.125707	19340000	19360000	0.98216
Higher LBS in Berkshire	3	19140000	19380000	0.00473296	0.125707	19360000	19380000	0.97932
Higher LBS in Berkshire	3	19140000	19380000	0.00473296	0.125707	19260000	19280000	0.987305
Higher LBS in Berkshire	3	23200000	23260000	0.0222404	0.0520677	23200000	23220000	0.988326
Higher LBS in Berkshire	3	23200000	23260000	0.0222404	0.0520677	23220000	23240000	0.989096
Higher LBS in Berkshire	3	23200000	23260000	0.0222404	0.0520677	23240000	23260000	0.991935
Higher LBS in Berkshire	3	23480000	23600000	0.0111531	0.0834693	23480000	23500000	0.991313
Higher LBS in Berkshire	3	23480000	23600000	0.0111531	0.0834693	23500000	23520000	0.989358
Higher LBS in Berkshire	3	23480000	23600000	0.0111531	0.0834693	23520000	23540000	0.976476
Higher LBS in Berkshire	3	23480000	23600000	0.0111531	0.0834693	23540000	23560000	0.98437
Higher LBS in Berkshire	3	23480000	23600000	0.0111531	0.0834693	23560000	23580000	0.98474
Higher LBS in Berkshire	3	23480000	23600000	0.0111531	0.0834693	23580000	23600000	0.985631
Higher LBS in Berkshire	3	24340000	24500000	0.00203752	0.0900662	24340000	24360000	0.993574
Higher LBS in Berkshire	3	24340000	24500000	0.00203752	0.0900662	24380000	24400000	0.986548
Higher LBS in Berkshire	3	24340000	24500000	0.00203752	0.0900662	24400000	24420000	0.995615
Higher LBS in Berkshire	3	24340000	24500000	0.00203752	0.0900662	24420000	24440000	0.99473
Higher LBS in Berkshire	3	24340000	24500000	0.00203752	0.0900662	24440000	24460000	0.994077
Higher LBS in Berkshire	3	24340000	24500000	0.00203752	0.0900662	24460000	24480000	0.985534
Higher LBS in Berkshire	3	24340000	24500000	0.00203752	0.0900662	24480000	24500000	0.985556
Higher LBS in Berkshire	3	24340000	24500000	0.00203752	0.0900662	24360000	24380000	0.985327
Higher LBS in Berkshire	3	32840000	33080000	0.0136952	0.0653362	32840000	32860000	0.998438
Higher LBS in Berkshire	3	32840000	33080000	0.0136952	0.0653362	32860000	32880000	0.995679
Higher LBS in Berkshire	3	32840000	33080000	0.0136952	0.0653362	32900000	32920000	0.998726
Higher LBS in Berkshire	3	32840000	33080000	0.0136952	0.0653362	32920000	32940000	0.994146
Higher LBS in Berkshire	3	32840000	33080000	0.0136952	0.0653362	32940000	32960000	0.996595
Higher LBS in Berkshire	3	32840000	33080000	0.0136952	0.0653362	32960000	32980000	0.997638
Higher LBS in Berkshire	3	32840000	33080000	0.0136952	0.0653362	32980000	33000000	0.997395
Higher LBS in Berkshire	3	32840000	33080000	0.0136952	0.0653362	33000000	33020000	0.994603
Higher LBS in Berkshire	3	32840000	33080000	0.0136952	0.0653362	33040000	33060000	0.988708
Higher LBS in Berkshire	3	32840000	33080000	0.0136952	0.0653362	33060000	33080000	0.996827
Higher LBS in Berkshire	3	32840000	33080000	0.0136952	0.0653362	32880000	32900000	0.998551
Higher LBS in Berkshire	3	32840000	33080000	0.0136952	0.0653362	33020000	33040000	0.995082
Higher LBS in Berkshire	3	35860000	35960000	0.0214161	0.0722016	35860000	35880000	0.995157
Higher LBS in Berkshire	3	35860000	35960000	0.0214161	0.0722016	35880000	35900000	0.995941
Higher LBS in Berkshire	3	35860000	35960000	0.0214161	0.0722016	35920000	35940000	0.993175
Higher LBS in Berkshire	3	35860000	35960000	0.0214161	0.0722016	35940000	35960000	0.989296
Higher LBS in Berkshire	3	35860000	35960000	0.0214161	0.0722016	35900000	35920000	0.997165
Higher LBS in Berkshire	3	36440000	36500000	0.0338781	0.0329455	36440000	36460000	0.988922
Higher LBS in Berkshire	3	36440000	36500000	0.0338781	0.0329455	36460000	36480000	0.99449
Higher LBS in Berkshire	3	36440000	36500000	0.0338781	0.0329455	36480000	36500000	0.993514
Higher LBS in Berkshire	3	39160000	39240000	0.0225995	0.0634248	39160000	39180000	0.998632
Higher LBS in Berkshire	3	39160000	39240000	0.0225995	0.0634248	39200000	39220000	0.996106
Higher LBS in Berkshire	3	39160000	39240000	0.0225995	0.0634248	39220000	39240000	0.996418
Higher LBS in Berkshire	3	39160000	39240000	0.0225995	0.0634248	39180000	39200000	0.997513
Higher LBS in Berkshire	3	50440000	50520000	0.0092988	0.0408164	50440000	50460000	0.993693
Higher LBS in Berkshire	3	50440000	50520000	0.0092988	0.0408164	50480000	50500000	0.998063
Higher LBS in Berkshire	3	50440000	50520000	0.0092988	0.0408164	50500000	50520000	0.997588
Higher LBS in Berkshire	3	50440000	50520000	0.0092988	0.0408164	50460000	50480000	0.99368
Higher LBS in Berkshire	3	53740000	53860000	0.0211212	0.0787282	53740000	53760000	0.993594
Higher LBS in Berkshire	3	53740000	53860000	0.0211212	0.0787282	53760000	53780000	0.990573
Higher LBS in Berkshire	3	53740000	53860000	0.0211212	0.0787282	53780000	53800000	0.990977
Higher LBS in Berkshire	3	53740000	53860000	0.0211212	0.0787282	53800000	53820000	0.992036
Higher LBS in Berkshire	3	53740000	53860000	0.0211212	0.0787282	53820000	53840000	0.994265
Higher LBS in Berkshire	3	53740000	53860000	0.0211212	0.0787282	53840000	53860000	0.990552
Higher LBS in Berkshire	3	55960000	56120000	0.0324043	0.14154	55980000	56000000	0.994109
Higher LBS in Berkshire	3	55960000	56120000	0.0324043	0.14154	56000000	56020000	0.988951
Higher LBS in Berkshire	3	55960000	56120000	0.0324043	0.14154	56020000	56040000	0.991934
Higher LBS in Berkshire	3	55960000	56120000	0.0324043	0.14154	56040000	56060000	0.996883
Higher LBS in Berkshire	3	55960000	56120000	0.0324043	0.14154	56060000	56080000	0.993033
Higher LBS in Berkshire	3	55960000	56120000	0.0324043	0.14154	56100000	56120000	0.994564
Higher LBS in Berkshire	3	55960000	56120000	0.0324043	0.14154	55960000	55980000	0.994171
Higher LBS in Berkshire	3	55960000	56120000	0.0324043	0.14154	56080000	56100000	0.988221
Higher LBS in Berkshire	3	59780000	59840000	0.0373333	0.0593209	59780000	59800000	0.994733
Higher LBS in Berkshire	3	59780000	59840000	0.0373333	0.0593209	59800000	59820000	0.988921
Higher LBS in Berkshire	3	59780000	59840000	0.0373333	0.0593209	59820000	59840000	0.987935
Higher LBS in Berkshire	3	66060000	66120000	0.0337042	0.0780885	66080000	66100000	0.997163
Higher LBS in Berkshire	3	66060000	66120000	0.0337042	0.0780885	66100000	66120000	0.991138
Higher LBS in Berkshire	3	66060000	66120000	0.0337042	0.0780885	66060000	66080000	0.992733
Higher LBS in Berkshire	3	70680000	70740000	0.0227269	0.0182627	70680000	70700000	0.991539
Higher LBS in Berkshire	3	70680000	70740000	0.0227269	0.0182627	70700000	70720000	0.991932
Higher LBS in Berkshire	3	70680000	70740000	0.0227269	0.0182627	70720000	70740000	0.995131
Higher LBS in Berkshire	3	72940000	73020000	0.024022	0.0458497	72940000	72960000	0.996926
Higher LBS in Berkshire	3	72940000	73020000	0.024022	0.0458497	72960000	72980000	0.994372
Higher LBS in Berkshire	3	72940000	73020000	0.024022	0.0458497	72980000	73000000	0.995498
Higher LBS in Berkshire	3	72940000	73020000	0.024022	0.0458497	73000000	73020000	0.994604
Higher LBS in Berkshire	3	73360000	73420000	0.039407	0.0527622	73360000	73380000	0.983581
Higher LBS in Berkshire	3	73360000	73420000	0.039407	0.0527622	73380000	73400000	0.991322
Higher LBS in Berkshire	3	73360000	73420000	0.039407	0.0527622	73400000	73420000	0.988196
Higher LBS in Berkshire	3	79660000	79880000	0.0210688	0.0566295	79660000	79680000	0.995351
Higher LBS in Berkshire	3	79660000	79880000	0.0210688	0.0566295	79700000	79720000	0.996527
Higher LBS in Berkshire	3	79660000	79880000	0.0210688	0.0566295	79720000	79740000	0.991982
Higher LBS in Berkshire	3	79660000	79880000	0.0210688	0.0566295	79740000	79760000	0.994482
Higher LBS in Berkshire	3	79660000	79880000	0.0210688	0.0566295	79760000	79780000	0.994776
Higher LBS in Berkshire	3	79660000	79880000	0.0210688	0.0566295	79780000	79800000	0.996493
Higher LBS in Berkshire	3	79660000	79880000	0.0210688	0.0566295	79800000	79820000	0.999263
Higher LBS in Berkshire	3	79660000	79880000	0.0210688	0.0566295	79840000	79860000	0.999475
Higher LBS in Berkshire	3	79660000	79880000	0.0210688	0.0566295	79860000	79880000	0.998776
Higher LBS in Berkshire	3	79660000	79880000	0.0210688	0.0566295	79820000	79840000	0.999575
Higher LBS in Berkshire	3	79660000	79880000	0.0210688	0.0566295	79680000	79700000	0.99621
Higher LBS in Berkshire	3	81200000	81320000	0.00297069	0.0522128	81200000	81220000	0.997169
Higher LBS in Berkshire	3	81200000	81320000	0.00297069	0.0522128	81220000	81240000	0.996454
Higher LBS in Berkshire	3	81200000	81320000	0.00297069	0.0522128	81240000	81260000	0.99569
Higher LBS in Berkshire	3	81200000	81320000	0.00297069	0.0522128	81280000	81300000	0.998088
Higher LBS in Berkshire	3	81200000	81320000	0.00297069	0.0522128	81300000	81320000	0.997676
Higher LBS in Berkshire	3	81200000	81320000	0.00297069	0.0522128	81260000	81280000	0.995752
Higher LBS in Berkshire	3	94940000	95120000	0.00168544	0.0442962	94940000	94960000	0.994386
Higher LBS in Berkshire	3	94940000	95120000	0.00168544	0.0442962	94960000	94980000	0.987304
Higher LBS in Berkshire	3	94940000	95120000	0.00168544	0.0442962	94980000	95000000	0.992614
Higher LBS in Berkshire	3	94940000	95120000	0.00168544	0.0442962	95000000	95020000	0.996839
Higher LBS in Berkshire	3	94940000	95120000	0.00168544	0.0442962	95040000	95060000	0.994916
Higher LBS in Berkshire	3	94940000	95120000	0.00168544	0.0442962	95060000	95080000	0.994904
Higher LBS in Berkshire	3	94940000	95120000	0.00168544	0.0442962	95080000	95100000	0.995447
Higher LBS in Berkshire	3	94940000	95120000	0.00168544	0.0442962	95100000	95120000	0.993084
Higher LBS in Berkshire	3	94940000	95120000	0.00168544	0.0442962	95020000	95040000	0.997396
Higher LBS in Berkshire	3	98060000	98160000	0.00886501	0.0290246	98060000	98080000	0.997964
Higher LBS in Berkshire	3	98060000	98160000	0.00886501	0.0290246	98080000	98100000	0.998175
Higher LBS in Berkshire	3	98060000	98160000	0.00886501	0.0290246	98100000	98120000	0.997826
Higher LBS in Berkshire	3	98060000	98160000	0.00886501	0.0290246	98120000	98140000	0.994947
Higher LBS in Berkshire	3	98060000	98160000	0.00886501	0.0290246	98140000	98160000	0.995731
Higher LBS in Berkshire	3	100840000	100940000	0.00712981	0.0371222	100840000	100860000	0.991605
Higher LBS in Berkshire	3	100840000	100940000	0.00712981	0.0371222	100860000	100880000	0.989593
Higher LBS in Berkshire	3	100840000	100940000	0.00712981	0.0371222	100880000	100900000	0.99457
Higher LBS in Berkshire	3	100840000	100940000	0.00712981	0.0371222	100900000	100920000	0.995439
Higher LBS in Berkshire	3	100840000	100940000	0.00712981	0.0371222	100920000	100940000	0.995478
Higher LBS in Berkshire	3	101140000	101240000	0.0336406	0.0786976	101140000	101160000	0.994294
Higher LBS in Berkshire	3	101140000	101240000	0.0336406	0.0786976	101160000	101180000	0.994253
Higher LBS in Berkshire	3	101140000	101240000	0.0336406	0.0786976	101200000	101220000	0.998113
Higher LBS in Berkshire	3	101140000	101240000	0.0336406	0.0786976	101220000	101240000	0.995311
Higher LBS in Berkshire	3	101140000	101240000	0.0336406	0.0786976	101180000	101200000	0.996688
Higher LBS in Berkshire	3	101720000	101780000	0.0254729	0.0497413	101720000	101740000	0.996042
Higher LBS in Berkshire	3	101720000	101780000	0.0254729	0.0497413	101740000	101760000	0.996177
Higher LBS in Berkshire	3	101720000	101780000	0.0254729	0.0497413	101760000	101780000	0.996989
Higher LBS in Berkshire	3	102300000	102400000	0.00641729	0.054775	102300000	102320000	0.991849
Higher LBS in Berkshire	3	102300000	102400000	0.00641729	0.054775	102320000	102340000	0.991032
Higher LBS in Berkshire	3	102300000	102400000	0.00641729	0.054775	102340000	102360000	0.995478
Higher LBS in Berkshire	3	102300000	102400000	0.00641729	0.054775	102380000	102400000	0.997557
Higher LBS in Berkshire	3	102300000	102400000	0.00641729	0.054775	102360000	102380000	0.994922
Higher LBS in Berkshire	3	110160000	110220000	0.0332929	0.0804695	110160000	110180000	0.990235
Higher LBS in Berkshire	3	110160000	110220000	0.0332929	0.0804695	110180000	110200000	0.98266
Higher LBS in Berkshire	3	110160000	110220000	0.0332929	0.0804695	110200000	110220000	0.990078
Higher LBS in Berkshire	3	110520000	110620000	0.0410316	0.05864	110520000	110540000	0.992022
Higher LBS in Berkshire	3	110520000	110620000	0.0410316	0.05864	110540000	110560000	0.988777
Higher LBS in Berkshire	3	110520000	110620000	0.0410316	0.05864	110560000	110580000	0.990709
Higher LBS in Berkshire	3	110520000	110620000	0.0410316	0.05864	110580000	110600000	0.989989
Higher LBS in Berkshire	3	110520000	110620000	0.0410316	0.05864	110600000	110620000	0.985755
Higher LBS in Berkshire	3	111680000	111820000	0.00477435	0.0805635	111680000	111700000	0.992259
Higher LBS in Berkshire	3	111680000	111820000	0.00477435	0.0805635	111700000	111720000	0.98963
Higher LBS in Berkshire	3	111680000	111820000	0.00477435	0.0805635	111720000	111740000	0.99201
Higher LBS in Berkshire	3	111680000	111820000	0.00477435	0.0805635	111740000	111760000	0.989082
Higher LBS in Berkshire	3	111680000	111820000	0.00477435	0.0805635	111760000	111780000	0.996069
Higher LBS in Berkshire	3	111680000	111820000	0.00477435	0.0805635	111780000	111800000	0.992837
Higher LBS in Berkshire	3	111680000	111820000	0.00477435	0.0805635	111800000	111820000	0.995409
Higher LBS in Berkshire	3	119300000	119380000	0.0187668	0.0904305	119300000	119320000	0.993462
Higher LBS in Berkshire	3	119300000	119380000	0.0187668	0.0904305	119320000	119340000	0.996635
Higher LBS in Berkshire	3	119300000	119380000	0.0187668	0.0904305	119340000	119360000	0.997007
Higher LBS in Berkshire	3	119300000	119380000	0.0187668	0.0904305	119360000	119380000	0.993843
Higher LBS in Berkshire	3	121580000	121660000	0.0233658	0.0340895	121580000	121600000	0.992638
Higher LBS in Berkshire	3	121580000	121660000	0.0233658	0.0340895	121600000	121620000	0.986635
Higher LBS in Berkshire	3	121580000	121660000	0.0233658	0.0340895	121640000	121660000	0.98783
Higher LBS in Berkshire	3	121580000	121660000	0.0233658	0.0340895	121620000	121640000	0.983221
Higher LBS in Berkshire	3	126300000	126440000	0.0134387	0.0974955	126300000	126320000	0.985487
Higher LBS in Berkshire	3	126300000	126440000	0.0134387	0.0974955	126320000	126340000	0.977457
Higher LBS in Berkshire	3	126300000	126440000	0.0134387	0.0974955	126360000	126380000	0.983941
Higher LBS in Berkshire	3	126300000	126440000	0.0134387	0.0974955	126380000	126400000	0.984086
Higher LBS in Berkshire	3	126300000	126440000	0.0134387	0.0974955	126400000	126420000	0.984047
Higher LBS in Berkshire	3	126300000	126440000	0.0134387	0.0974955	126420000	126440000	0.987186
Higher LBS in Berkshire	3	126300000	126440000	0.0134387	0.0974955	126340000	126360000	0.986444
Higher LBS in Berkshire	4	7540000	7640000	0.0196356	0.100687	7540000	7560000	0.981273
Higher LBS in Berkshire	4	7540000	7640000	0.0196356	0.100687	7560000	7580000	0.987864
Higher LBS in Berkshire	4	7540000	7640000	0.0196356	0.100687	7580000	7600000	0.98084
Higher LBS in Berkshire	4	7540000	7640000	0.0196356	0.100687	7620000	7640000	0.986257
Higher LBS in Berkshire	4	7540000	7640000	0.0196356	0.100687	7600000	7620000	0.98293
Higher LBS in Berkshire	4	13440000	13500000	0.0441751	0.0742021	13440000	13460000	0.995776
Higher LBS in Berkshire	4	13440000	13500000	0.0441751	0.0742021	13460000	13480000	0.993188
Higher LBS in Berkshire	4	13440000	13500000	0.0441751	0.0742021	13480000	13500000	0.992159
Higher LBS in Berkshire	4	21580000	21920000	0.00197012	0.088937	21580000	21600000	0.992265
Higher LBS in Berkshire	4	21580000	21920000	0.00197012	0.088937	21600000	21620000	0.991597
Higher LBS in Berkshire	4	21580000	21920000	0.00197012	0.088937	21640000	21660000	0.991418
Higher LBS in Berkshire	4	21580000	21920000	0.00197012	0.088937	21660000	21680000	0.991618
Higher LBS in Berkshire	4	21580000	21920000	0.00197012	0.088937	21680000	21700000	0.989011
Higher LBS in Berkshire	4	21580000	21920000	0.00197012	0.088937	21700000	21720000	0.991811
Higher LBS in Berkshire	4	21580000	21920000	0.00197012	0.088937	21720000	21740000	0.991389
Higher LBS in Berkshire	4	21580000	21920000	0.00197012	0.088937	21760000	21780000	0.989925
Higher LBS in Berkshire	4	21580000	21920000	0.00197012	0.088937	21780000	21800000	0.987533
Higher LBS in Berkshire	4	21580000	21920000	0.00197012	0.088937	21800000	21820000	0.994301
Higher LBS in Berkshire	4	21580000	21920000	0.00197012	0.088937	21820000	21840000	0.98947
Higher LBS in Berkshire	4	21580000	21920000	0.00197012	0.088937	21840000	21860000	0.987801
Higher LBS in Berkshire	4	21580000	21920000	0.00197012	0.088937	21860000	21880000	0.988445
Higher LBS in Berkshire	4	21580000	21920000	0.00197012	0.088937	21900000	21920000	0.990431
Higher LBS in Berkshire	4	21580000	21920000	0.00197012	0.088937	21620000	21640000	0.992127
Higher LBS in Berkshire	4	21580000	21920000	0.00197012	0.088937	21740000	21760000	0.990401
Higher LBS in Berkshire	4	21580000	21920000	0.00197012	0.088937	21880000	21900000	0.979792
Higher LBS in Berkshire	4	40860000	40960000	0.0198066	0.0577196	40860000	40880000	0.995386
Higher LBS in Berkshire	4	40860000	40960000	0.0198066	0.0577196	40900000	40920000	0.997315
Higher LBS in Berkshire	4	40860000	40960000	0.0198066	0.0577196	40920000	40940000	0.992853
Higher LBS in Berkshire	4	40860000	40960000	0.0198066	0.0577196	40940000	40960000	0.996689
Higher LBS in Berkshire	4	40860000	40960000	0.0198066	0.0577196	40880000	40900000	0.995015
Higher LBS in Berkshire	4	45500000	45560000	0.00774911	0.091764	45500000	45520000	0.999106
Higher LBS in Berkshire	4	45500000	45560000	0.00774911	0.091764	45520000	45540000	0.995846
Higher LBS in Berkshire	4	45500000	45560000	0.00774911	0.091764	45540000	45560000	0.997064
Higher LBS in Berkshire	4	49520000	49600000	0.0344146	0.0409008	49520000	49540000	0.994385
Higher LBS in Berkshire	4	49520000	49600000	0.0344146	0.0409008	49560000	49580000	0.99627
Higher LBS in Berkshire	4	49520000	49600000	0.0344146	0.0409008	49580000	49600000	0.994486
Higher LBS in Berkshire	4	49520000	49600000	0.0344146	0.0409008	49540000	49560000	0.994467
Higher LBS in Berkshire	4	55820000	55960000	0.020462	0.0376779	55840000	55860000	0.995829
Higher LBS in Berkshire	4	55820000	55960000	0.020462	0.0376779	55860000	55880000	0.991802
Higher LBS in Berkshire	4	55820000	55960000	0.020462	0.0376779	55880000	55900000	0.99124
Higher LBS in Berkshire	4	55820000	55960000	0.020462	0.0376779	55900000	55920000	0.98677
Higher LBS in Berkshire	4	55820000	55960000	0.020462	0.0376779	55920000	55940000	0.993928
Higher LBS in Berkshire	4	55820000	55960000	0.020462	0.0376779	55940000	55960000	0.988527
Higher LBS in Berkshire	4	55820000	55960000	0.020462	0.0376779	55820000	55840000	0.996077
Higher LBS in Berkshire	4	57760000	57840000	0.0192205	0.0746731	57760000	57780000	0.995145
Higher LBS in Berkshire	4	57760000	57840000	0.0192205	0.0746731	57780000	57800000	0.989699
Higher LBS in Berkshire	4	57760000	57840000	0.0192205	0.0746731	57820000	57840000	0.990786
Higher LBS in Berkshire	4	57760000	57840000	0.0192205	0.0746731	57800000	57820000	0.994943
Higher LBS in Berkshire	4	63380000	63540000	0.00012761	0.0590985	63380000	63400000	0.994811
Higher LBS in Berkshire	4	63380000	63540000	0.00012761	0.0590985	63400000	63420000	0.994361
Higher LBS in Berkshire	4	63380000	63540000	0.00012761	0.0590985	63440000	63460000	0.99191
Higher LBS in Berkshire	4	63380000	63540000	0.00012761	0.0590985	63460000	63480000	0.990236
Higher LBS in Berkshire	4	63380000	63540000	0.00012761	0.0590985	63480000	63500000	0.995184
Higher LBS in Berkshire	4	63380000	63540000	0.00012761	0.0590985	63500000	63520000	0.994786
Higher LBS in Berkshire	4	63380000	63540000	0.00012761	0.0590985	63520000	63540000	0.986154
Higher LBS in Berkshire	4	63380000	63540000	0.00012761	0.0590985	63420000	63440000	0.995732
Higher LBS in Berkshire	4	65200000	65260000	0.0214132	0.0326216	65200000	65220000	0.998113
Higher LBS in Berkshire	4	65200000	65260000	0.0214132	0.0326216	65220000	65240000	0.995401
Higher LBS in Berkshire	4	65200000	65260000	0.0214132	0.0326216	65240000	65260000	0.9933
Higher LBS in Berkshire	4	65320000	65380000	0.039175	0.0549139	65320000	65340000	0.989294
Higher LBS in Berkshire	4	65320000	65380000	0.039175	0.0549139	65340000	65360000	0.994167
Higher LBS in Berkshire	4	65320000	65380000	0.039175	0.0549139	65360000	65380000	0.989521
Higher LBS in Berkshire	4	65460000	65640000	0.00291512	0.0803046	65460000	65480000	0.993922
Higher LBS in Berkshire	4	65460000	65640000	0.00291512	0.0803046	65480000	65500000	0.983095
Higher LBS in Berkshire	4	65460000	65640000	0.00291512	0.0803046	65500000	65520000	0.985714
Higher LBS in Berkshire	4	65460000	65640000	0.00291512	0.0803046	65540000	65560000	0.987588
Higher LBS in Berkshire	4	65460000	65640000	0.00291512	0.0803046	65560000	65580000	0.992184
Higher LBS in Berkshire	4	65460000	65640000	0.00291512	0.0803046	65580000	65600000	0.993044
Higher LBS in Berkshire	4	65460000	65640000	0.00291512	0.0803046	65600000	65620000	0.986737
Higher LBS in Berkshire	4	65460000	65640000	0.00291512	0.0803046	65620000	65640000	0.992549
Higher LBS in Berkshire	4	65460000	65640000	0.00291512	0.0803046	65520000	65540000	0.984701
Higher LBS in Berkshire	4	66240000	66380000	0.0222731	0.0924546	66240000	66260000	0.992725
Higher LBS in Berkshire	4	66240000	66380000	0.0222731	0.0924546	66260000	66280000	0.991759
Higher LBS in Berkshire	4	66240000	66380000	0.0222731	0.0924546	66280000	66300000	0.992378
Higher LBS in Berkshire	4	66240000	66380000	0.0222731	0.0924546	66300000	66320000	0.995104
Higher LBS in Berkshire	4	66240000	66380000	0.0222731	0.0924546	66340000	66360000	0.997626
Higher LBS in Berkshire	4	66240000	66380000	0.0222731	0.0924546	66360000	66380000	0.996107
Higher LBS in Berkshire	4	66240000	66380000	0.0222731	0.0924546	66320000	66340000	0.996064
Higher LBS in Berkshire	4	67360000	67560000	0.01251	0.110878	67380000	67400000	0.987941
Higher LBS in Berkshire	4	67360000	67560000	0.01251	0.110878	67400000	67420000	0.992526
Higher LBS in Berkshire	4	67360000	67560000	0.01251	0.110878	67420000	67440000	0.993911
Higher LBS in Berkshire	4	67360000	67560000	0.01251	0.110878	67440000	67460000	0.996613
Higher LBS in Berkshire	4	67360000	67560000	0.01251	0.110878	67460000	67480000	0.998907
Higher LBS in Berkshire	4	67360000	67560000	0.01251	0.110878	67480000	67500000	0.99915
Higher LBS in Berkshire	4	67360000	67560000	0.01251	0.110878	67520000	67540000	0.998638
Higher LBS in Berkshire	4	67360000	67560000	0.01251	0.110878	67540000	67560000	0.9991
Higher LBS in Berkshire	4	67360000	67560000	0.01251	0.110878	67360000	67380000	0.98988
Higher LBS in Berkshire	4	67360000	67560000	0.01251	0.110878	67500000	67520000	0.998547
Higher LBS in Berkshire	4	69400000	69520000	0.0358821	0.0828512	69400000	69420000	0.99163
Higher LBS in Berkshire	4	69400000	69520000	0.0358821	0.0828512	69420000	69440000	0.996452
Higher LBS in Berkshire	4	69400000	69520000	0.0358821	0.0828512	69440000	69460000	0.995399
Higher LBS in Berkshire	4	69400000	69520000	0.0358821	0.0828512	69480000	69500000	0.997944
Higher LBS in Berkshire	4	69400000	69520000	0.0358821	0.0828512	69500000	69520000	0.992811
Higher LBS in Berkshire	4	69400000	69520000	0.0358821	0.0828512	69460000	69480000	0.99449
Higher LBS in Berkshire	4	71760000	71860000	0.00452732	0.0553189	71760000	71780000	0.996463
Higher LBS in Berkshire	4	71760000	71860000	0.00452732	0.0553189	71780000	71800000	0.98621
Higher LBS in Berkshire	4	71760000	71860000	0.00452732	0.0553189	71800000	71820000	0.992238
Higher LBS in Berkshire	4	71760000	71860000	0.00452732	0.0553189	71840000	71860000	0.992077
Higher LBS in Berkshire	4	71760000	71860000	0.00452732	0.0553189	71820000	71840000	0.990779
Higher LBS in Berkshire	4	74920000	75100000	0.0194666	0.0725708	74920000	74940000	0.986191
Higher LBS in Berkshire	4	74920000	75100000	0.0194666	0.0725708	74940000	74960000	0.988645
Higher LBS in Berkshire	4	74920000	75100000	0.0194666	0.0725708	74980000	75000000	0.990359
Higher LBS in Berkshire	4	74920000	75100000	0.0194666	0.0725708	75000000	75020000	0.986838
Higher LBS in Berkshire	4	74920000	75100000	0.0194666	0.0725708	75020000	75040000	0.98786
Higher LBS in Berkshire	4	74920000	75100000	0.0194666	0.0725708	75040000	75060000	0.985758
Higher LBS in Berkshire	4	74920000	75100000	0.0194666	0.0725708	75060000	75080000	0.990713
Higher LBS in Berkshire	4	74920000	75100000	0.0194666	0.0725708	75080000	75100000	0.993335
Higher LBS in Berkshire	4	74920000	75100000	0.0194666	0.0725708	74960000	74980000	0.989515
Higher LBS in Berkshire	4	78620000	78700000	0.0351147	0.0639993	78620000	78640000	0.988256
Higher LBS in Berkshire	4	78620000	78700000	0.0351147	0.0639993	78660000	78680000	0.99374
Higher LBS in Berkshire	4	78620000	78700000	0.0351147	0.0639993	78680000	78700000	0.992242
Higher LBS in Berkshire	4	78620000	78700000	0.0351147	0.0639993	78640000	78660000	0.994479
Higher LBS in Berkshire	4	85540000	85700000	0.0277862	0.0812573	85540000	85560000	0.988986
Higher LBS in Berkshire	4	85540000	85700000	0.0277862	0.0812573	85560000	85580000	0.990897
Higher LBS in Berkshire	4	85540000	85700000	0.0277862	0.0812573	85600000	85620000	0.993258
Higher LBS in Berkshire	4	85540000	85700000	0.0277862	0.0812573	85620000	85640000	0.991921
Higher LBS in Berkshire	4	85540000	85700000	0.0277862	0.0812573	85640000	85660000	0.992523
Higher LBS in Berkshire	4	85540000	85700000	0.0277862	0.0812573	85660000	85680000	0.993166
Higher LBS in Berkshire	4	85540000	85700000	0.0277862	0.0812573	85680000	85700000	0.9987
Higher LBS in Berkshire	4	85540000	85700000	0.0277862	0.0812573	85580000	85600000	0.998069
Higher LBS in Berkshire	4	87620000	87800000	0.000426942	0.104741	87620000	87640000	0.986805
Higher LBS in Berkshire	4	87620000	87800000	0.000426942	0.104741	87640000	87660000	0.98526
Higher LBS in Berkshire	4	87620000	87800000	0.000426942	0.104741	87660000	87680000	0.988887
Higher LBS in Berkshire	4	87620000	87800000	0.000426942	0.104741	87700000	87720000	0.994609
Higher LBS in Berkshire	4	87620000	87800000	0.000426942	0.104741	87720000	87740000	0.9912
Higher LBS in Berkshire	4	87620000	87800000	0.000426942	0.104741	87740000	87760000	0.99574
Higher LBS in Berkshire	4	87620000	87800000	0.000426942	0.104741	87760000	87780000	0.997652
Higher LBS in Berkshire	4	87620000	87800000	0.000426942	0.104741	87780000	87800000	0.997001
Higher LBS in Berkshire	4	87620000	87800000	0.000426942	0.104741	87680000	87700000	0.999525
Higher LBS in Berkshire	4	89620000	89680000	0.0113418	0.271705	89620000	89640000	0.996189
Higher LBS in Berkshire	4	89620000	89680000	0.0113418	0.271705	89660000	89680000	0.994783
Higher LBS in Berkshire	4	89620000	89680000	0.0113418	0.271705	89640000	89660000	0.995942
Higher LBS in Berkshire	4	90500000	90680000	0.0230411	0.0926072	90500000	90520000	0.990956
Higher LBS in Berkshire	4	90500000	90680000	0.0230411	0.0926072	90520000	90540000	0.992817
Higher LBS in Berkshire	4	90500000	90680000	0.0230411	0.0926072	90540000	90560000	0.993694
Higher LBS in Berkshire	4	90500000	90680000	0.0230411	0.0926072	90580000	90600000	0.989482
Higher LBS in Berkshire	4	90500000	90680000	0.0230411	0.0926072	90600000	90620000	0.991004
Higher LBS in Berkshire	4	90500000	90680000	0.0230411	0.0926072	90620000	90640000	0.994258
Higher LBS in Berkshire	4	90500000	90680000	0.0230411	0.0926072	90640000	90660000	0.989122
Higher LBS in Berkshire	4	90500000	90680000	0.0230411	0.0926072	90660000	90680000	0.98783
Higher LBS in Berkshire	4	90500000	90680000	0.0230411	0.0926072	90560000	90580000	0.99402
Higher LBS in Berkshire	4	93180000	93240000	0.00779405	0.0287903	93200000	93220000	0.994084
Higher LBS in Berkshire	4	93180000	93240000	0.00779405	0.0287903	93220000	93240000	0.995337
Higher LBS in Berkshire	4	93180000	93240000	0.00779405	0.0287903	93180000	93200000	0.993956
Higher LBS in Berkshire	4	100340000	100400000	0.0298342	0.110204	100340000	100360000	0.998482
Higher LBS in Berkshire	4	100340000	100400000	0.0298342	0.110204	100360000	100380000	0.998251
Higher LBS in Berkshire	4	100340000	100400000	0.0298342	0.110204	100380000	100400000	0.99855
Higher LBS in Berkshire	4	100680000	100800000	0.0130709	0.15839	100680000	100700000	0.99577
Higher LBS in Berkshire	4	100680000	100800000	0.0130709	0.15839	100700000	100720000	0.994782
Higher LBS in Berkshire	4	100680000	100800000	0.0130709	0.15839	100720000	100740000	0.996529
Higher LBS in Berkshire	4	100680000	100800000	0.0130709	0.15839	100740000	100760000	0.99122
Higher LBS in Berkshire	4	100680000	100800000	0.0130709	0.15839	100760000	100780000	0.994659
Higher LBS in Berkshire	4	100680000	100800000	0.0130709	0.15839	100780000	100800000	0.991347
Higher LBS in Berkshire	4	103400000	103620000	0.00406737	0.041906	103420000	103440000	0.984697
Higher LBS in Berkshire	4	103400000	103620000	0.00406737	0.041906	103440000	103460000	0.986241
Higher LBS in Berkshire	4	103400000	103620000	0.00406737	0.041906	103460000	103480000	0.987683
Higher LBS in Berkshire	4	103400000	103620000	0.00406737	0.041906	103480000	103500000	0.989888
Higher LBS in Berkshire	4	103400000	103620000	0.00406737	0.041906	103500000	103520000	0.98734
Higher LBS in Berkshire	4	103400000	103620000	0.00406737	0.041906	103520000	103540000	0.988028
Higher LBS in Berkshire	4	103400000	103620000	0.00406737	0.041906	103560000	103580000	0.990517
Higher LBS in Berkshire	4	103400000	103620000	0.00406737	0.041906	103580000	103600000	0.993615
Higher LBS in Berkshire	4	103400000	103620000	0.00406737	0.041906	103600000	103620000	0.989736
Higher LBS in Berkshire	4	103400000	103620000	0.00406737	0.041906	103400000	103420000	0.990879
Higher LBS in Berkshire	4	103400000	103620000	0.00406737	0.041906	103540000	103560000	0.985788
Higher LBS in Berkshire	4	107220000	107340000	0.00639301	0.110531	107220000	107240000	0.990804
Higher LBS in Berkshire	4	107220000	107340000	0.00639301	0.110531	107240000	107260000	0.99007
Higher LBS in Berkshire	4	107220000	107340000	0.00639301	0.110531	107260000	107280000	0.99161
Higher LBS in Berkshire	4	107220000	107340000	0.00639301	0.110531	107280000	107300000	0.991829
Higher LBS in Berkshire	4	107220000	107340000	0.00639301	0.110531	107300000	107320000	0.98577
Higher LBS in Berkshire	4	107220000	107340000	0.00639301	0.110531	107320000	107340000	0.988333
Higher LBS in Berkshire	4	108540000	108680000	0.00314517	0.165485	108540000	108560000	0.989275
Higher LBS in Berkshire	4	108540000	108680000	0.00314517	0.165485	108560000	108580000	0.987254
Higher LBS in Berkshire	4	108540000	108680000	0.00314517	0.165485	108580000	108600000	0.983
Higher LBS in Berkshire	4	108540000	108680000	0.00314517	0.165485	108600000	108620000	0.984108
Higher LBS in Berkshire	4	108540000	108680000	0.00314517	0.165485	108620000	108640000	0.988517
Higher LBS in Berkshire	4	108540000	108680000	0.00314517	0.165485	108660000	108680000	0.987977
Higher LBS in Berkshire	4	108540000	108680000	0.00314517	0.165485	108640000	108660000	0.987188
Higher LBS in Berkshire	4	109180000	109380000	0.00571616	0.121146	109200000	109220000	0.988933
Higher LBS in Berkshire	4	109180000	109380000	0.00571616	0.121146	109220000	109240000	0.987832
Higher LBS in Berkshire	4	109180000	109380000	0.00571616	0.121146	109240000	109260000	0.986199
Higher LBS in Berkshire	4	109180000	109380000	0.00571616	0.121146	109260000	109280000	0.993095
Higher LBS in Berkshire	4	109180000	109380000	0.00571616	0.121146	109280000	109300000	0.988167
Higher LBS in Berkshire	4	109180000	109380000	0.00571616	0.121146	109320000	109340000	0.99392
Higher LBS in Berkshire	4	109180000	109380000	0.00571616	0.121146	109340000	109360000	0.99161
Higher LBS in Berkshire	4	109180000	109380000	0.00571616	0.121146	109360000	109380000	0.98708
Higher LBS in Berkshire	4	109180000	109380000	0.00571616	0.121146	109180000	109200000	0.99404
Higher LBS in Berkshire	4	109180000	109380000	0.00571616	0.121146	109300000	109320000	0.99316
Higher LBS in Berkshire	4	110380000	110540000	0.00530305	0.115979	110380000	110400000	0.992272
Higher LBS in Berkshire	4	110380000	110540000	0.00530305	0.115979	110400000	110420000	0.992531
Higher LBS in Berkshire	4	110380000	110540000	0.00530305	0.115979	110420000	110440000	0.997302
Higher LBS in Berkshire	4	110380000	110540000	0.00530305	0.115979	110440000	110460000	0.997294
Higher LBS in Berkshire	4	110380000	110540000	0.00530305	0.115979	110460000	110480000	0.994135
Higher LBS in Berkshire	4	110380000	110540000	0.00530305	0.115979	110500000	110520000	0.990386
Higher LBS in Berkshire	4	110380000	110540000	0.00530305	0.115979	110520000	110540000	0.994952
Higher LBS in Berkshire	4	110380000	110540000	0.00530305	0.115979	110480000	110500000	0.994375
Higher LBS in Berkshire	4	115240000	115300000	0.0208425	0.119486	115240000	115260000	0.999762
Higher LBS in Berkshire	4	115240000	115300000	0.0208425	0.119486	115260000	115280000	0.993168
Higher LBS in Berkshire	4	115240000	115300000	0.0208425	0.119486	115280000	115300000	0.994339
Higher LBS in Berkshire	4	119420000	119520000	0.0370777	0.13038	119420000	119440000	0.988684
Higher LBS in Berkshire	4	119420000	119520000	0.0370777	0.13038	119440000	119460000	0.983847
Higher LBS in Berkshire	4	119420000	119520000	0.0370777	0.13038	119460000	119480000	0.986148
Higher LBS in Berkshire	4	119420000	119520000	0.0370777	0.13038	119480000	119500000	0.990065
Higher LBS in Berkshire	4	119420000	119520000	0.0370777	0.13038	119500000	119520000	0.982158
Higher LBS in Berkshire	4	123940000	124020000	0.0186676	0.0630073	123940000	123960000	0.994684
Higher LBS in Berkshire	4	123940000	124020000	0.0186676	0.0630073	123960000	123980000	0.99454
Higher LBS in Berkshire	4	123940000	124020000	0.0186676	0.0630073	124000000	124020000	0.993788
Higher LBS in Berkshire	4	123940000	124020000	0.0186676	0.0630073	123980000	124000000	0.996396
Higher LBS in Berkshire	4	129820000	129920000	0.0249337	0.0759976	129820000	129840000	0.995123
Higher LBS in Berkshire	4	129820000	129920000	0.0249337	0.0759976	129840000	129860000	0.992008
Higher LBS in Berkshire	4	129820000	129920000	0.0249337	0.0759976	129860000	129880000	0.993516
Higher LBS in Berkshire	4	129820000	129920000	0.0249337	0.0759976	129900000	129920000	0.993949
Higher LBS in Berkshire	4	129820000	129920000	0.0249337	0.0759976	129880000	129900000	0.99216
Higher LBS in Berkshire	5	2700000	2800000	0.0204424	0.0718275	2700000	2720000	0.983305
Higher LBS in Berkshire	5	2700000	2800000	0.0204424	0.0718275	2720000	2740000	0.980721
Higher LBS in Berkshire	5	2700000	2800000	0.0204424	0.0718275	2760000	2780000	0.985007
Higher LBS in Berkshire	5	2700000	2800000	0.0204424	0.0718275	2780000	2800000	0.986676
Higher LBS in Berkshire	5	2700000	2800000	0.0204424	0.0718275	2740000	2760000	0.978152
Higher LBS in Berkshire	5	3040000	3120000	0.0136932	0.097714	3040000	3060000	0.999088
Higher LBS in Berkshire	5	3040000	3120000	0.0136932	0.097714	3060000	3080000	1
Higher LBS in Berkshire	5	3040000	3120000	0.0136932	0.097714	3080000	3100000	1
Higher LBS in Berkshire	5	3040000	3120000	0.0136932	0.097714	3100000	3120000	0.999163
Higher LBS in Berkshire	5	16520000	16580000	0.0199757	0.0872968	16520000	16540000	0.994726
Higher LBS in Berkshire	5	16520000	16580000	0.0199757	0.0872968	16540000	16560000	0.989744
Higher LBS in Berkshire	5	16520000	16580000	0.0199757	0.0872968	16560000	16580000	0.984639
Higher LBS in Berkshire	5	17800000	17860000	0.0433675	0.0570527	17800000	17820000	0.999938
Higher LBS in Berkshire	5	17800000	17860000	0.0433675	0.0570527	17840000	17860000	0.99817
Higher LBS in Berkshire	5	17800000	17860000	0.0433675	0.0570527	17820000	17840000	0.999988
Higher LBS in Berkshire	5	19980000	20100000	0.00287621	0.103517	19980000	20000000	0.991598
Higher LBS in Berkshire	5	19980000	20100000	0.00287621	0.103517	20000000	20020000	0.991999
Higher LBS in Berkshire	5	19980000	20100000	0.00287621	0.103517	20020000	20040000	0.988507
Higher LBS in Berkshire	5	19980000	20100000	0.00287621	0.103517	20060000	20080000	0.991633
Higher LBS in Berkshire	5	19980000	20100000	0.00287621	0.103517	20080000	20100000	0.995939
Higher LBS in Berkshire	5	19980000	20100000	0.00287621	0.103517	20040000	20060000	0.995684
Higher LBS in Berkshire	5	20460000	20580000	0.0115441	0.18322	20460000	20480000	0.994456
Higher LBS in Berkshire	5	20460000	20580000	0.0115441	0.18322	20480000	20500000	0.996227
Higher LBS in Berkshire	5	20460000	20580000	0.0115441	0.18322	20500000	20520000	0.996085
Higher LBS in Berkshire	5	20460000	20580000	0.0115441	0.18322	20520000	20540000	0.987011
Higher LBS in Berkshire	5	20460000	20580000	0.0115441	0.18322	20540000	20560000	0.989007
Higher LBS in Berkshire	5	20460000	20580000	0.0115441	0.18322	20560000	20580000	0.991587
Higher LBS in Berkshire	5	22680000	22740000	0.0219759	0.0314079	22680000	22700000	0.997753
Higher LBS in Berkshire	5	22680000	22740000	0.0219759	0.0314079	22700000	22720000	0.997527
Higher LBS in Berkshire	5	22680000	22740000	0.0219759	0.0314079	22720000	22740000	0.997438
Higher LBS in Berkshire	5	23920000	23980000	0.0493815	0.0824242	23920000	23940000	0.98935
Higher LBS in Berkshire	5	23920000	23980000	0.0493815	0.0824242	23940000	23960000	0.99089
Higher LBS in Berkshire	5	23920000	23980000	0.0493815	0.0824242	23960000	23980000	0.979566
Higher LBS in Berkshire	5	33240000	33340000	0.0106261	0.0546873	33240000	33260000	0.993415
Higher LBS in Berkshire	5	33240000	33340000	0.0106261	0.0546873	33260000	33280000	0.996574
Higher LBS in Berkshire	5	33240000	33340000	0.0106261	0.0546873	33300000	33320000	0.993874
Higher LBS in Berkshire	5	33240000	33340000	0.0106261	0.0546873	33320000	33340000	0.991288
Higher LBS in Berkshire	5	33240000	33340000	0.0106261	0.0546873	33280000	33300000	0.989368
Higher LBS in Berkshire	5	33520000	33580000	0.0118747	0.0520434	33520000	33540000	0.996641
Higher LBS in Berkshire	5	33520000	33580000	0.0118747	0.0520434	33560000	33580000	0.99685
Higher LBS in Berkshire	5	33520000	33580000	0.0118747	0.0520434	33540000	33560000	0.998474
Higher LBS in Berkshire	5	42860000	43000000	0.0210972	0.0833442	42880000	42900000	0.989697
Higher LBS in Berkshire	5	42860000	43000000	0.0210972	0.0833442	42900000	42920000	0.984354
Higher LBS in Berkshire	5	42860000	43000000	0.0210972	0.0833442	42920000	42940000	0.995098
Higher LBS in Berkshire	5	42860000	43000000	0.0210972	0.0833442	42940000	42960000	0.990633
Higher LBS in Berkshire	5	42860000	43000000	0.0210972	0.0833442	42960000	42980000	0.992244
Higher LBS in Berkshire	5	42860000	43000000	0.0210972	0.0833442	42860000	42880000	0.994071
Higher LBS in Berkshire	5	42860000	43000000	0.0210972	0.0833442	42980000	43000000	0.990427
Higher LBS in Berkshire	5	43940000	44020000	0.00578521	0.0220188	43940000	43960000	0.994432
Higher LBS in Berkshire	5	43940000	44020000	0.00578521	0.0220188	43960000	43980000	0.994586
Higher LBS in Berkshire	5	43940000	44020000	0.00578521	0.0220188	43980000	44000000	0.988638
Higher LBS in Berkshire	5	43940000	44020000	0.00578521	0.0220188	44000000	44020000	0.987667
Higher LBS in Berkshire	5	46640000	46720000	0.0403578	0.0350583	46640000	46660000	0.994831
Higher LBS in Berkshire	5	46640000	46720000	0.0403578	0.0350583	46680000	46700000	0.995652
Higher LBS in Berkshire	5	46640000	46720000	0.0403578	0.0350583	46700000	46720000	0.996271
Higher LBS in Berkshire	5	46640000	46720000	0.0403578	0.0350583	46660000	46680000	0.992085
Higher LBS in Berkshire	5	52040000	52180000	0.0146983	0.125289	52040000	52060000	0.994531
Higher LBS in Berkshire	5	52040000	52180000	0.0146983	0.125289	52060000	52080000	0.99714
Higher LBS in Berkshire	5	52040000	52180000	0.0146983	0.125289	52080000	52100000	0.992072
Higher LBS in Berkshire	5	52040000	52180000	0.0146983	0.125289	52100000	52120000	0.993699
Higher LBS in Berkshire	5	52040000	52180000	0.0146983	0.125289	52120000	52140000	0.988043
Higher LBS in Berkshire	5	52040000	52180000	0.0146983	0.125289	52140000	52160000	0.992031
Higher LBS in Berkshire	5	52040000	52180000	0.0146983	0.125289	52160000	52180000	0.994685
Higher LBS in Berkshire	5	57560000	57640000	0.00238837	0.0298552	57560000	57580000	0.993864
Higher LBS in Berkshire	5	57560000	57640000	0.00238837	0.0298552	57580000	57600000	0.989166
Higher LBS in Berkshire	5	57560000	57640000	0.00238837	0.0298552	57600000	57620000	0.990504
Higher LBS in Berkshire	5	57560000	57640000	0.00238837	0.0298552	57620000	57640000	0.990407
Higher LBS in Berkshire	5	59320000	59560000	0.00188758	0.0561109	59320000	59340000	0.987288
Higher LBS in Berkshire	5	59320000	59560000	0.00188758	0.0561109	59340000	59360000	0.984863
Higher LBS in Berkshire	5	59320000	59560000	0.00188758	0.0561109	59380000	59400000	0.989161
Higher LBS in Berkshire	5	59320000	59560000	0.00188758	0.0561109	59400000	59420000	0.988329
Higher LBS in Berkshire	5	59320000	59560000	0.00188758	0.0561109	59420000	59440000	0.982754
Higher LBS in Berkshire	5	59320000	59560000	0.00188758	0.0561109	59440000	59460000	0.987374
Higher LBS in Berkshire	5	59320000	59560000	0.00188758	0.0561109	59460000	59480000	0.985028
Higher LBS in Berkshire	5	59320000	59560000	0.00188758	0.0561109	59480000	59500000	0.982934
Higher LBS in Berkshire	5	59320000	59560000	0.00188758	0.0561109	59520000	59540000	0.987108
Higher LBS in Berkshire	5	59320000	59560000	0.00188758	0.0561109	59540000	59560000	0.986098
Higher LBS in Berkshire	5	59320000	59560000	0.00188758	0.0561109	59360000	59380000	0.983776
Higher LBS in Berkshire	5	59320000	59560000	0.00188758	0.0561109	59500000	59520000	0.982297
Higher LBS in Berkshire	5	60940000	61120000	0.0100688	0.181142	60960000	60980000	0.997159
Higher LBS in Berkshire	5	60940000	61120000	0.0100688	0.181142	60980000	61000000	1
Higher LBS in Berkshire	5	60940000	61120000	0.0100688	0.181142	61000000	61020000	0.999888
Higher LBS in Berkshire	5	60940000	61120000	0.0100688	0.181142	61020000	61040000	0.9997
Higher LBS in Berkshire	5	60940000	61120000	0.0100688	0.181142	61040000	61060000	0.999975
Higher LBS in Berkshire	5	60940000	61120000	0.0100688	0.181142	61080000	61100000	0.998588
Higher LBS in Berkshire	5	60940000	61120000	0.0100688	0.181142	61100000	61120000	0.993329
Higher LBS in Berkshire	5	60940000	61120000	0.0100688	0.181142	60940000	60960000	0.99402
Higher LBS in Berkshire	5	60940000	61120000	0.0100688	0.181142	61060000	61080000	0.999975
Higher LBS in Berkshire	5	62260000	62340000	0.033315	0.0583455	62260000	62280000	0.984881
Higher LBS in Berkshire	5	62260000	62340000	0.033315	0.0583455	62280000	62300000	0.983184
Higher LBS in Berkshire	5	62260000	62340000	0.033315	0.0583455	62300000	62320000	0.991429
Higher LBS in Berkshire	5	62260000	62340000	0.033315	0.0583455	62320000	62340000	0.995184
Higher LBS in Berkshire	5	62680000	62740000	0.0205775	0.0285514	62680000	62700000	0.997402
Higher LBS in Berkshire	5	62680000	62740000	0.0205775	0.0285514	62700000	62720000	0.997389
Higher LBS in Berkshire	5	62680000	62740000	0.0205775	0.0285514	62720000	62740000	0.99059
Higher LBS in Berkshire	5	63480000	63560000	0.00865762	0.394008	63480000	63500000	0.99103
Higher LBS in Berkshire	5	63480000	63560000	0.00865762	0.394008	63500000	63520000	0.985913
Higher LBS in Berkshire	5	63480000	63560000	0.00865762	0.394008	63520000	63540000	0.986509
Higher LBS in Berkshire	5	63480000	63560000	0.00865762	0.394008	63540000	63560000	0.99484
Higher LBS in Berkshire	5	67760000	67860000	0.00940368	0.0515603	67780000	67800000	0.99504
Higher LBS in Berkshire	5	67760000	67860000	0.00940368	0.0515603	67800000	67820000	0.995188
Higher LBS in Berkshire	5	67760000	67860000	0.00940368	0.0515603	67820000	67840000	0.99464
Higher LBS in Berkshire	5	67760000	67860000	0.00940368	0.0515603	67840000	67860000	0.99257
Higher LBS in Berkshire	5	67760000	67860000	0.00940368	0.0515603	67760000	67780000	0.993097
Higher LBS in Berkshire	5	73980000	74080000	0.0456347	0.0828543	73980000	74000000	0.990654
Higher LBS in Berkshire	5	73980000	74080000	0.0456347	0.0828543	74000000	74020000	0.991996
Higher LBS in Berkshire	5	73980000	74080000	0.0456347	0.0828543	74020000	74040000	0.989815
Higher LBS in Berkshire	5	73980000	74080000	0.0456347	0.0828543	74060000	74080000	0.988161
Higher LBS in Berkshire	5	73980000	74080000	0.0456347	0.0828543	74040000	74060000	0.995082
Higher LBS in Berkshire	5	76460000	76540000	0.00929298	0.0478218	76460000	76480000	0.988403
Higher LBS in Berkshire	5	76460000	76540000	0.00929298	0.0478218	76480000	76500000	0.989655
Higher LBS in Berkshire	5	76460000	76540000	0.00929298	0.0478218	76500000	76520000	0.996121
Higher LBS in Berkshire	5	76460000	76540000	0.00929298	0.0478218	76520000	76540000	0.991173
Higher LBS in Berkshire	5	80360000	80520000	0.0346451	0.10046	80360000	80380000	0.997773
Higher LBS in Berkshire	5	80360000	80520000	0.0346451	0.10046	80380000	80400000	0.999006
Higher LBS in Berkshire	5	80360000	80520000	0.0346451	0.10046	80400000	80420000	0.996095
Higher LBS in Berkshire	5	80360000	80520000	0.0346451	0.10046	80420000	80440000	0.994888
Higher LBS in Berkshire	5	80360000	80520000	0.0346451	0.10046	80440000	80460000	0.982501
Higher LBS in Berkshire	5	80360000	80520000	0.0346451	0.10046	80480000	80500000	0.99238
Higher LBS in Berkshire	5	80360000	80520000	0.0346451	0.10046	80500000	80520000	0.996202
Higher LBS in Berkshire	5	80360000	80520000	0.0346451	0.10046	80460000	80480000	0.992005
Higher LBS in Berkshire	5	81380000	81540000	0.0186521	0.0612775	81400000	81420000	0.988491
Higher LBS in Berkshire	5	81380000	81540000	0.0186521	0.0612775	81420000	81440000	0.993042
Higher LBS in Berkshire	5	81380000	81540000	0.0186521	0.0612775	81440000	81460000	0.988916
Higher LBS in Berkshire	5	81380000	81540000	0.0186521	0.0612775	81460000	81480000	0.991976
Higher LBS in Berkshire	5	81380000	81540000	0.0186521	0.0612775	81480000	81500000	0.989648
Higher LBS in Berkshire	5	81380000	81540000	0.0186521	0.0612775	81500000	81520000	0.990215
Higher LBS in Berkshire	5	81380000	81540000	0.0186521	0.0612775	81380000	81400000	0.99074
Higher LBS in Berkshire	5	81380000	81540000	0.0186521	0.0612775	81520000	81540000	0.990526
Higher LBS in Berkshire	5	84380000	84460000	0.0123269	0.0480517	84380000	84400000	0.985586
Higher LBS in Berkshire	5	84380000	84460000	0.0123269	0.0480517	84420000	84440000	0.991149
Higher LBS in Berkshire	5	84380000	84460000	0.0123269	0.0480517	84440000	84460000	0.991914
Higher LBS in Berkshire	5	84380000	84460000	0.0123269	0.0480517	84400000	84420000	0.985984
Higher LBS in Berkshire	5	84980000	85200000	0.0414389	0.212057	84980000	85000000	0.995639
Higher LBS in Berkshire	5	84980000	85200000	0.0414389	0.212057	85000000	85020000	0.990329
Higher LBS in Berkshire	5	84980000	85200000	0.0414389	0.212057	85020000	85040000	0.985852
Higher LBS in Berkshire	5	84980000	85200000	0.0414389	0.212057	85040000	85060000	0.990594
Higher LBS in Berkshire	5	84980000	85200000	0.0414389	0.212057	85080000	85100000	0.991066
Higher LBS in Berkshire	5	84980000	85200000	0.0414389	0.212057	85100000	85120000	0.985413
Higher LBS in Berkshire	5	84980000	85200000	0.0414389	0.212057	85120000	85140000	0.984555
Higher LBS in Berkshire	5	84980000	85200000	0.0414389	0.212057	85140000	85160000	0.988837
Higher LBS in Berkshire	5	84980000	85200000	0.0414389	0.212057	85160000	85180000	0.992939
Higher LBS in Berkshire	5	84980000	85200000	0.0414389	0.212057	85060000	85080000	0.989004
Higher LBS in Berkshire	5	84980000	85200000	0.0414389	0.212057	85180000	85200000	0.989172
Higher LBS in Berkshire	5	93060000	93160000	0.00236689	0.0319624	93080000	93100000	0.990809
Higher LBS in Berkshire	5	93060000	93160000	0.00236689	0.0319624	93100000	93120000	0.987988
Higher LBS in Berkshire	5	93060000	93160000	0.00236689	0.0319624	93120000	93140000	0.988787
Higher LBS in Berkshire	5	93060000	93160000	0.00236689	0.0319624	93140000	93160000	0.984273
Higher LBS in Berkshire	5	93060000	93160000	0.00236689	0.0319624	93060000	93080000	0.992327
Higher LBS in Berkshire	5	96540000	96620000	0.00907346	0.0274818	96540000	96560000	0.989593
Higher LBS in Berkshire	5	96540000	96620000	0.00907346	0.0274818	96560000	96580000	0.983476
Higher LBS in Berkshire	5	96540000	96620000	0.00907346	0.0274818	96580000	96600000	0.985491
Higher LBS in Berkshire	5	96540000	96620000	0.00907346	0.0274818	96600000	96620000	0.983087
Higher LBS in Berkshire	5	98180000	98400000	0.00953848	0.0476531	98180000	98200000	0.984033
Higher LBS in Berkshire	5	98180000	98400000	0.00953848	0.0476531	98200000	98220000	0.991107
Higher LBS in Berkshire	5	98180000	98400000	0.00953848	0.0476531	98220000	98240000	0.98284
Higher LBS in Berkshire	5	98180000	98400000	0.00953848	0.0476531	98240000	98260000	0.985192
Higher LBS in Berkshire	5	98180000	98400000	0.00953848	0.0476531	98260000	98280000	0.981914
Higher LBS in Berkshire	5	98180000	98400000	0.00953848	0.0476531	98280000	98300000	0.987832
Higher LBS in Berkshire	5	98180000	98400000	0.00953848	0.0476531	98320000	98340000	0.989815
Higher LBS in Berkshire	5	98180000	98400000	0.00953848	0.0476531	98340000	98360000	0.988431
Higher LBS in Berkshire	5	98180000	98400000	0.00953848	0.0476531	98360000	98380000	0.99007
Higher LBS in Berkshire	5	98180000	98400000	0.00953848	0.0476531	98380000	98400000	0.994389
Higher LBS in Berkshire	5	98180000	98400000	0.00953848	0.0476531	98300000	98320000	0.990661
Higher LBS in Berkshire	5	103460000	103720000	0.00542048	0.0777822	103460000	103480000	0.993217
Higher LBS in Berkshire	5	103460000	103720000	0.00542048	0.0777822	103480000	103500000	0.997276
Higher LBS in Berkshire	5	103460000	103720000	0.00542048	0.0777822	103500000	103520000	0.994722
Higher LBS in Berkshire	5	103460000	103720000	0.00542048	0.0777822	103520000	103540000	0.990995
Higher LBS in Berkshire	5	103460000	103720000	0.00542048	0.0777822	103560000	103580000	0.990514
Higher LBS in Berkshire	5	103460000	103720000	0.00542048	0.0777822	103580000	103600000	0.984704
Higher LBS in Berkshire	5	103460000	103720000	0.00542048	0.0777822	103600000	103620000	0.991655
Higher LBS in Berkshire	5	103460000	103720000	0.00542048	0.0777822	103620000	103640000	0.994096
Higher LBS in Berkshire	5	103460000	103720000	0.00542048	0.0777822	103640000	103660000	0.995236
Higher LBS in Berkshire	5	103460000	103720000	0.00542048	0.0777822	103680000	103700000	0.994437
Higher LBS in Berkshire	5	103460000	103720000	0.00542048	0.0777822	103700000	103720000	0.990003
Higher LBS in Berkshire	5	103460000	103720000	0.00542048	0.0777822	103540000	103560000	0.994211
Higher LBS in Berkshire	5	103460000	103720000	0.00542048	0.0777822	103660000	103680000	0.995026
Higher LBS in Berkshire	6	1940000	2000000	0.0452713	0.0591916	1940000	1960000	0.993842
Higher LBS in Berkshire	6	1940000	2000000	0.0452713	0.0591916	1980000	2000000	0.984786
Higher LBS in Berkshire	6	1940000	2000000	0.0452713	0.0591916	1960000	1980000	0.986377
Higher LBS in Berkshire	6	6960000	7180000	0.00212998	0.055291	6960000	6980000	0.988311
Higher LBS in Berkshire	6	6960000	7180000	0.00212998	0.055291	6980000	7000000	0.989535
Higher LBS in Berkshire	6	6960000	7180000	0.00212998	0.055291	7000000	7020000	0.989174
Higher LBS in Berkshire	6	6960000	7180000	0.00212998	0.055291	7020000	7040000	0.984362
Higher LBS in Berkshire	6	6960000	7180000	0.00212998	0.055291	7040000	7060000	0.987918
Higher LBS in Berkshire	6	6960000	7180000	0.00212998	0.055291	7080000	7100000	0.989657
Higher LBS in Berkshire	6	6960000	7180000	0.00212998	0.055291	7100000	7120000	0.983097
Higher LBS in Berkshire	6	6960000	7180000	0.00212998	0.055291	7120000	7140000	0.984804
Higher LBS in Berkshire	6	6960000	7180000	0.00212998	0.055291	7140000	7160000	0.982701
Higher LBS in Berkshire	6	6960000	7180000	0.00212998	0.055291	7160000	7180000	0.990921
Higher LBS in Berkshire	6	6960000	7180000	0.00212998	0.055291	7060000	7080000	0.985775
Higher LBS in Berkshire	6	12720000	12840000	0.0164376	0.0659369	12720000	12740000	0.992494
Higher LBS in Berkshire	6	12720000	12840000	0.0164376	0.0659369	12740000	12760000	0.996289
Higher LBS in Berkshire	6	12720000	12840000	0.0164376	0.0659369	12760000	12780000	0.985417
Higher LBS in Berkshire	6	12720000	12840000	0.0164376	0.0659369	12780000	12800000	0.987481
Higher LBS in Berkshire	6	12720000	12840000	0.0164376	0.0659369	12800000	12820000	0.978716
Higher LBS in Berkshire	6	12720000	12840000	0.0164376	0.0659369	12820000	12840000	0.980081
Higher LBS in Berkshire	6	14440000	14520000	0.0235517	0.0315831	14440000	14460000	0.98654
Higher LBS in Berkshire	6	14440000	14520000	0.0235517	0.0315831	14460000	14480000	0.988463
Higher LBS in Berkshire	6	14440000	14520000	0.0235517	0.0315831	14480000	14500000	0.98817
Higher LBS in Berkshire	6	14440000	14520000	0.0235517	0.0315831	14500000	14520000	0.987211
Higher LBS in Berkshire	6	18760000	18920000	0.016628	0.12456	18760000	18780000	0.997756
Higher LBS in Berkshire	6	18760000	18920000	0.016628	0.12456	18780000	18800000	0.997816
Higher LBS in Berkshire	6	18760000	18920000	0.016628	0.12456	18800000	18820000	0.997791
Higher LBS in Berkshire	6	18760000	18920000	0.016628	0.12456	18820000	18840000	0.995096
Higher LBS in Berkshire	6	18760000	18920000	0.016628	0.12456	18840000	18860000	0.991085
Higher LBS in Berkshire	6	18760000	18920000	0.016628	0.12456	18880000	18900000	0.992797
Higher LBS in Berkshire	6	18760000	18920000	0.016628	0.12456	18900000	18920000	0.995415
Higher LBS in Berkshire	6	18760000	18920000	0.016628	0.12456	18860000	18880000	0.988166
Higher LBS in Berkshire	6	22120000	22180000	0.0372183	0.0619322	22120000	22140000	0.991004
Higher LBS in Berkshire	6	22120000	22180000	0.0372183	0.0619322	22160000	22180000	0.992428
Higher LBS in Berkshire	6	22120000	22180000	0.0372183	0.0619322	22140000	22160000	0.989787
Higher LBS in Berkshire	6	24440000	24500000	0.0352346	0.044996	24440000	24460000	0.992119
Higher LBS in Berkshire	6	24440000	24500000	0.0352346	0.044996	24460000	24480000	0.990965
Higher LBS in Berkshire	6	24440000	24500000	0.0352346	0.044996	24480000	24500000	0.996964
Higher LBS in Berkshire	6	31700000	31780000	0.0274153	0.0506344	31720000	31740000	0.985169
Higher LBS in Berkshire	6	31700000	31780000	0.0274153	0.0506344	31740000	31760000	0.995052
Higher LBS in Berkshire	6	31700000	31780000	0.0274153	0.0506344	31760000	31780000	0.997227
Higher LBS in Berkshire	6	31700000	31780000	0.0274153	0.0506344	31700000	31720000	0.99144
Higher LBS in Berkshire	6	35800000	35900000	0.0395428	0.0872975	35800000	35820000	0.988065
Higher LBS in Berkshire	6	35800000	35900000	0.0395428	0.0872975	35820000	35840000	0.983963
Higher LBS in Berkshire	6	35800000	35900000	0.0395428	0.0872975	35840000	35860000	0.988689
Higher LBS in Berkshire	6	35800000	35900000	0.0395428	0.0872975	35860000	35880000	0.987598
Higher LBS in Berkshire	6	35800000	35900000	0.0395428	0.0872975	35880000	35900000	0.987667
Higher LBS in Berkshire	6	36440000	36500000	0.0349043	0.0701381	36440000	36460000	0.98722
Higher LBS in Berkshire	6	36440000	36500000	0.0349043	0.0701381	36460000	36480000	0.988141
Higher LBS in Berkshire	6	36440000	36500000	0.0349043	0.0701381	36480000	36500000	0.982316
Higher LBS in Berkshire	6	39960000	40040000	0.00686303	0.0541443	39980000	40000000	0.988729
Higher LBS in Berkshire	6	39960000	40040000	0.00686303	0.0541443	40000000	40020000	0.984536
Higher LBS in Berkshire	6	39960000	40040000	0.00686303	0.0541443	40020000	40040000	0.989682
Higher LBS in Berkshire	6	39960000	40040000	0.00686303	0.0541443	39960000	39980000	0.992418
Higher LBS in Berkshire	6	54380000	54440000	0.0183638	0.0417506	54400000	54420000	0.999225
Higher LBS in Berkshire	6	54380000	54440000	0.0183638	0.0417506	54420000	54440000	0.99895
Higher LBS in Berkshire	6	54380000	54440000	0.0183638	0.0417506	54380000	54400000	0.998657
Higher LBS in Berkshire	6	54960000	55020000	0.0337494	0.0501784	54960000	54980000	0.997588
Higher LBS in Berkshire	6	54960000	55020000	0.0337494	0.0501784	54980000	55000000	0.998432
Higher LBS in Berkshire	6	54960000	55020000	0.0337494	0.0501784	55000000	55020000	0.997857
Higher LBS in Berkshire	6	57640000	57800000	0.0389067	0.164539	57640000	57660000	0.996317
Higher LBS in Berkshire	6	57640000	57800000	0.0389067	0.164539	57680000	57700000	0.995347
Higher LBS in Berkshire	6	57640000	57800000	0.0389067	0.164539	57700000	57720000	0.995332
Higher LBS in Berkshire	6	57640000	57800000	0.0389067	0.164539	57720000	57740000	0.993893
Higher LBS in Berkshire	6	57640000	57800000	0.0389067	0.164539	57740000	57760000	0.996292
Higher LBS in Berkshire	6	57640000	57800000	0.0389067	0.164539	57760000	57780000	0.996646
Higher LBS in Berkshire	6	57640000	57800000	0.0389067	0.164539	57780000	57800000	0.998051
Higher LBS in Berkshire	6	57640000	57800000	0.0389067	0.164539	57660000	57680000	0.997051
Higher LBS in Berkshire	6	65000000	65140000	0.0180584	0.0952876	65020000	65040000	0.998488
Higher LBS in Berkshire	6	65000000	65140000	0.0180584	0.0952876	65040000	65060000	0.995925
Higher LBS in Berkshire	6	65000000	65140000	0.0180584	0.0952876	65060000	65080000	0.997019
Higher LBS in Berkshire	6	65000000	65140000	0.0180584	0.0952876	65080000	65100000	0.995601
Higher LBS in Berkshire	6	65000000	65140000	0.0180584	0.0952876	65100000	65120000	0.995701
Higher LBS in Berkshire	6	65000000	65140000	0.0180584	0.0952876	65120000	65140000	0.995661
Higher LBS in Berkshire	6	65000000	65140000	0.0180584	0.0952876	65000000	65020000	0.997671
Higher LBS in Berkshire	6	72260000	72360000	0.0156093	0.0507585	72260000	72280000	0.996679
Higher LBS in Berkshire	6	72260000	72360000	0.0156093	0.0507585	72280000	72300000	0.99108
Higher LBS in Berkshire	6	72260000	72360000	0.0156093	0.0507585	72300000	72320000	0.985342
Higher LBS in Berkshire	6	72260000	72360000	0.0156093	0.0507585	72320000	72340000	0.994953
Higher LBS in Berkshire	6	72260000	72360000	0.0156093	0.0507585	72340000	72360000	0.990165
Higher LBS in Berkshire	6	74200000	74280000	0.0223412	0.0560445	74200000	74220000	0.994964
Higher LBS in Berkshire	6	74200000	74280000	0.0223412	0.0560445	74220000	74240000	0.994767
Higher LBS in Berkshire	6	74200000	74280000	0.0223412	0.0560445	74240000	74260000	0.993023
Higher LBS in Berkshire	6	74200000	74280000	0.0223412	0.0560445	74260000	74280000	0.99411
Higher LBS in Berkshire	6	76440000	76560000	0.0435332	0.268727	76440000	76460000	0.998856
Higher LBS in Berkshire	6	76440000	76560000	0.0435332	0.268727	76460000	76480000	0.998713
Higher LBS in Berkshire	6	76440000	76560000	0.0435332	0.268727	76480000	76500000	0.998813
Higher LBS in Berkshire	6	76440000	76560000	0.0435332	0.268727	76500000	76520000	0.991942
Higher LBS in Berkshire	6	76440000	76560000	0.0435332	0.268727	76520000	76540000	0.9916
Higher LBS in Berkshire	6	76440000	76560000	0.0435332	0.268727	76540000	76560000	0.992053
Higher LBS in Berkshire	6	88640000	88720000	0.0113207	0.0731786	88640000	88660000	0.991289
Higher LBS in Berkshire	6	88640000	88720000	0.0113207	0.0731786	88660000	88680000	0.984534
Higher LBS in Berkshire	6	88640000	88720000	0.0113207	0.0731786	88680000	88700000	0.992095
Higher LBS in Berkshire	6	88640000	88720000	0.0113207	0.0731786	88700000	88720000	0.994429
Higher LBS in Berkshire	6	92420000	92560000	0.0130886	0.0692642	92420000	92440000	0.996615
Higher LBS in Berkshire	6	92420000	92560000	0.0130886	0.0692642	92440000	92460000	0.995742
Higher LBS in Berkshire	6	92420000	92560000	0.0130886	0.0692642	92460000	92480000	0.990939
Higher LBS in Berkshire	6	92420000	92560000	0.0130886	0.0692642	92480000	92500000	0.989664
Higher LBS in Berkshire	6	92420000	92560000	0.0130886	0.0692642	92500000	92520000	0.99003
Higher LBS in Berkshire	6	92420000	92560000	0.0130886	0.0692642	92540000	92560000	0.996007
Higher LBS in Berkshire	6	92420000	92560000	0.0130886	0.0692642	92520000	92540000	0.993448
Higher LBS in Berkshire	6	96600000	96700000	0.0201989	0.0637308	96620000	96640000	0.991873
Higher LBS in Berkshire	6	96600000	96700000	0.0201989	0.0637308	96640000	96660000	0.997566
Higher LBS in Berkshire	6	96600000	96700000	0.0201989	0.0637308	96660000	96680000	0.996877
Higher LBS in Berkshire	6	96600000	96700000	0.0201989	0.0637308	96680000	96700000	0.998018
Higher LBS in Berkshire	6	96600000	96700000	0.0201989	0.0637308	96600000	96620000	0.995824
Higher LBS in Berkshire	6	96980000	97140000	0.0392723	0.145006	97000000	97020000	0.993096
Higher LBS in Berkshire	6	96980000	97140000	0.0392723	0.145006	97020000	97040000	0.995338
Higher LBS in Berkshire	6	96980000	97140000	0.0392723	0.145006	97040000	97060000	0.997324
Higher LBS in Berkshire	6	96980000	97140000	0.0392723	0.145006	97060000	97080000	0.997704
Higher LBS in Berkshire	6	96980000	97140000	0.0392723	0.145006	97080000	97100000	0.995413
Higher LBS in Berkshire	6	96980000	97140000	0.0392723	0.145006	97100000	97120000	0.996915
Higher LBS in Berkshire	6	96980000	97140000	0.0392723	0.145006	96980000	97000000	0.993109
Higher LBS in Berkshire	6	96980000	97140000	0.0392723	0.145006	97120000	97140000	0.995001
Higher LBS in Berkshire	6	99260000	99320000	0.0370886	0.088258	99260000	99280000	0.989985
Higher LBS in Berkshire	6	99260000	99320000	0.0370886	0.088258	99280000	99300000	0.991924
Higher LBS in Berkshire	6	99260000	99320000	0.0370886	0.088258	99300000	99320000	0.991897
Higher LBS in Berkshire	6	100800000	100860000	0.0271671	0.0562669	100800000	100820000	0.992821
Higher LBS in Berkshire	6	100800000	100860000	0.0271671	0.0562669	100820000	100840000	0.997334
Higher LBS in Berkshire	6	100800000	100860000	0.0271671	0.0562669	100840000	100860000	0.989865
Higher LBS in Berkshire	6	102680000	102740000	0.0350318	0.0660304	102680000	102700000	0.994466
Higher LBS in Berkshire	6	102680000	102740000	0.0350318	0.0660304	102700000	102720000	0.995066
Higher LBS in Berkshire	6	102680000	102740000	0.0350318	0.0660304	102720000	102740000	0.995241
Higher LBS in Berkshire	6	108480000	108540000	0.030874	0.0322951	108480000	108500000	0.990108
Higher LBS in Berkshire	6	108480000	108540000	0.030874	0.0322951	108500000	108520000	0.990438
Higher LBS in Berkshire	6	108480000	108540000	0.030874	0.0322951	108520000	108540000	0.991734
Higher LBS in Berkshire	6	108740000	108840000	0.0308316	0.0832187	108740000	108760000	0.996778
Higher LBS in Berkshire	6	108740000	108840000	0.0308316	0.0832187	108760000	108780000	0.994473
Higher LBS in Berkshire	6	108740000	108840000	0.0308316	0.0832187	108800000	108820000	0.995394
Higher LBS in Berkshire	6	108740000	108840000	0.0308316	0.0832187	108820000	108840000	0.994804
Higher LBS in Berkshire	6	108740000	108840000	0.0308316	0.0832187	108780000	108800000	0.991522
Higher LBS in Berkshire	6	109500000	109620000	0.0236928	0.0702472	109500000	109520000	0.99499
Higher LBS in Berkshire	6	109500000	109620000	0.0236928	0.0702472	109520000	109540000	0.994962
Higher LBS in Berkshire	6	109500000	109620000	0.0236928	0.0702472	109540000	109560000	0.996015
Higher LBS in Berkshire	6	109500000	109620000	0.0236928	0.0702472	109580000	109600000	0.994928
Higher LBS in Berkshire	6	109500000	109620000	0.0236928	0.0702472	109600000	109620000	0.996577
Higher LBS in Berkshire	6	109500000	109620000	0.0236928	0.0702472	109560000	109580000	0.994746
Higher LBS in Berkshire	6	110460000	110620000	0.00102277	0.0386901	110460000	110480000	0.99754
Higher LBS in Berkshire	6	110460000	110620000	0.00102277	0.0386901	110500000	110520000	0.996777
Higher LBS in Berkshire	6	110460000	110620000	0.00102277	0.0386901	110520000	110540000	0.997163
Higher LBS in Berkshire	6	110460000	110620000	0.00102277	0.0386901	110540000	110560000	0.996803
Higher LBS in Berkshire	6	110460000	110620000	0.00102277	0.0386901	110560000	110580000	0.995916
Higher LBS in Berkshire	6	110460000	110620000	0.00102277	0.0386901	110580000	110600000	0.994826
Higher LBS in Berkshire	6	110460000	110620000	0.00102277	0.0386901	110600000	110620000	0.997302
Higher LBS in Berkshire	6	110460000	110620000	0.00102277	0.0386901	110480000	110500000	0.997951
Higher LBS in Berkshire	6	119320000	119380000	0.0368227	0.0596921	119320000	119340000	0.988601
Higher LBS in Berkshire	6	119320000	119380000	0.0368227	0.0596921	119340000	119360000	0.994073
Higher LBS in Berkshire	6	119320000	119380000	0.0368227	0.0596921	119360000	119380000	0.996564
Higher LBS in Berkshire	6	123480000	123580000	0.0293992	0.0706347	123480000	123500000	0.994612
Higher LBS in Berkshire	6	123480000	123580000	0.0293992	0.0706347	123500000	123520000	0.998289
Higher LBS in Berkshire	6	123480000	123580000	0.0293992	0.0706347	123520000	123540000	0.99707
Higher LBS in Berkshire	6	123480000	123580000	0.0293992	0.0706347	123540000	123560000	0.998051
Higher LBS in Berkshire	6	123480000	123580000	0.0293992	0.0706347	123560000	123580000	0.998638
Higher LBS in Berkshire	6	124600000	124660000	0.0451042	0.0338123	124600000	124620000	0.996054
Higher LBS in Berkshire	6	124600000	124660000	0.0451042	0.0338123	124620000	124640000	0.996834
Higher LBS in Berkshire	6	124600000	124660000	0.0451042	0.0338123	124640000	124660000	0.993848
Higher LBS in Berkshire	6	124700000	124780000	0.0354011	0.0362872	124700000	124720000	0.995381
Higher LBS in Berkshire	6	124700000	124780000	0.0354011	0.0362872	124720000	124740000	0.994207
Higher LBS in Berkshire	6	124700000	124780000	0.0354011	0.0362872	124740000	124760000	0.99207
Higher LBS in Berkshire	6	124700000	124780000	0.0354011	0.0362872	124760000	124780000	0.995547
Higher LBS in Berkshire	6	128560000	128860000	0.00777339	0.0628823	128560000	128580000	0.987162
Higher LBS in Berkshire	6	128560000	128860000	0.00777339	0.0628823	128600000	128620000	0.991759
Higher LBS in Berkshire	6	128560000	128860000	0.00777339	0.0628823	128620000	128640000	0.986485
Higher LBS in Berkshire	6	128560000	128860000	0.00777339	0.0628823	128640000	128660000	0.987555
Higher LBS in Berkshire	6	128560000	128860000	0.00777339	0.0628823	128660000	128680000	0.988045
Higher LBS in Berkshire	6	128560000	128860000	0.00777339	0.0628823	128680000	128700000	0.988241
Higher LBS in Berkshire	6	128560000	128860000	0.00777339	0.0628823	128720000	128740000	0.988365
Higher LBS in Berkshire	6	128560000	128860000	0.00777339	0.0628823	128740000	128760000	0.990006
Higher LBS in Berkshire	6	128560000	128860000	0.00777339	0.0628823	128760000	128780000	0.995124
Higher LBS in Berkshire	6	128560000	128860000	0.00777339	0.0628823	128780000	128800000	0.993874
Higher LBS in Berkshire	6	128560000	128860000	0.00777339	0.0628823	128800000	128820000	0.989949
Higher LBS in Berkshire	6	128560000	128860000	0.00777339	0.0628823	128820000	128840000	0.99277
Higher LBS in Berkshire	6	128560000	128860000	0.00777339	0.0628823	128580000	128600000	0.988427
Higher LBS in Berkshire	6	128560000	128860000	0.00777339	0.0628823	128700000	128720000	0.991251
Higher LBS in Berkshire	6	128560000	128860000	0.00777339	0.0628823	128840000	128860000	0.995908
Higher LBS in Berkshire	6	145460000	145540000	0.00987046	0.0363385	145460000	145480000	0.983844
Higher LBS in Berkshire	6	145460000	145540000	0.00987046	0.0363385	145500000	145520000	0.989912
Higher LBS in Berkshire	6	145460000	145540000	0.00987046	0.0363385	145520000	145540000	0.985049
Higher LBS in Berkshire	6	145460000	145540000	0.00987046	0.0363385	145480000	145500000	0.980881
Higher LBS in Berkshire	6	149440000	149640000	0.00930683	0.0672666	149440000	149460000	0.991073
Higher LBS in Berkshire	6	149440000	149640000	0.00930683	0.0672666	149460000	149480000	0.991244
Higher LBS in Berkshire	6	149440000	149640000	0.00930683	0.0672666	149480000	149500000	0.991194
Higher LBS in Berkshire	6	149440000	149640000	0.00930683	0.0672666	149500000	149520000	0.988121
Higher LBS in Berkshire	6	149440000	149640000	0.00930683	0.0672666	149520000	149540000	0.992597
Higher LBS in Berkshire	6	149440000	149640000	0.00930683	0.0672666	149560000	149580000	0.989572
Higher LBS in Berkshire	6	149440000	149640000	0.00930683	0.0672666	149580000	149600000	0.989438
Higher LBS in Berkshire	6	149440000	149640000	0.00930683	0.0672666	149600000	149620000	0.99011
Higher LBS in Berkshire	6	149440000	149640000	0.00930683	0.0672666	149620000	149640000	0.99187
Higher LBS in Berkshire	6	149440000	149640000	0.00930683	0.0672666	149540000	149560000	0.989927
Higher LBS in Berkshire	6	153920000	154000000	0.0325657	0.0533324	153920000	153940000	0.990524
Higher LBS in Berkshire	6	153920000	154000000	0.0325657	0.0533324	153940000	153960000	0.986628
Higher LBS in Berkshire	6	153920000	154000000	0.0325657	0.0533324	153960000	153980000	0.984313
Higher LBS in Berkshire	6	153920000	154000000	0.0325657	0.0533324	153980000	154000000	0.986036
Higher LBS in Berkshire	6	154180000	154400000	0.00436152	0.0988448	154180000	154200000	0.992095
Higher LBS in Berkshire	6	154180000	154400000	0.00436152	0.0988448	154200000	154220000	0.990329
Higher LBS in Berkshire	6	154180000	154400000	0.00436152	0.0988448	154220000	154240000	0.991306
Higher LBS in Berkshire	6	154180000	154400000	0.00436152	0.0988448	154240000	154260000	0.992119
Higher LBS in Berkshire	6	154180000	154400000	0.00436152	0.0988448	154280000	154300000	0.993135
Higher LBS in Berkshire	6	154180000	154400000	0.00436152	0.0988448	154300000	154320000	0.989828
Higher LBS in Berkshire	6	154180000	154400000	0.00436152	0.0988448	154320000	154340000	0.987774
Higher LBS in Berkshire	6	154180000	154400000	0.00436152	0.0988448	154340000	154360000	0.986664
Higher LBS in Berkshire	6	154180000	154400000	0.00436152	0.0988448	154360000	154380000	0.991247
Higher LBS in Berkshire	6	154180000	154400000	0.00436152	0.0988448	154380000	154400000	0.987209
Higher LBS in Berkshire	6	154180000	154400000	0.00436152	0.0988448	154260000	154280000	0.992889
Higher LBS in Berkshire	6	154780000	155000000	0.00729608	0.0554792	154800000	154820000	0.98509
Higher LBS in Berkshire	6	154780000	155000000	0.00729608	0.0554792	154820000	154840000	0.990387
Higher LBS in Berkshire	6	154780000	155000000	0.00729608	0.0554792	154840000	154860000	0.991944
Higher LBS in Berkshire	6	154780000	155000000	0.00729608	0.0554792	154860000	154880000	0.986798
Higher LBS in Berkshire	6	154780000	155000000	0.00729608	0.0554792	154880000	154900000	0.98887
Higher LBS in Berkshire	6	154780000	155000000	0.00729608	0.0554792	154900000	154920000	0.98853
Higher LBS in Berkshire	6	154780000	155000000	0.00729608	0.0554792	154940000	154960000	0.985082
Higher LBS in Berkshire	6	154780000	155000000	0.00729608	0.0554792	154960000	154980000	0.98567
Higher LBS in Berkshire	6	154780000	155000000	0.00729608	0.0554792	154980000	155000000	0.982608
Higher LBS in Berkshire	6	154780000	155000000	0.00729608	0.0554792	154780000	154800000	0.988365
Higher LBS in Berkshire	6	154780000	155000000	0.00729608	0.0554792	154920000	154940000	0.986419
Higher LBS in Berkshire	6	155440000	155600000	0.00330425	0.0537103	155460000	155480000	0.983829
Higher LBS in Berkshire	6	155440000	155600000	0.00330425	0.0537103	155480000	155500000	0.984428
Higher LBS in Berkshire	6	155440000	155600000	0.00330425	0.0537103	155500000	155520000	0.986412
Higher LBS in Berkshire	6	155440000	155600000	0.00330425	0.0537103	155520000	155540000	0.981314
Higher LBS in Berkshire	6	155440000	155600000	0.00330425	0.0537103	155540000	155560000	0.982795
Higher LBS in Berkshire	6	155440000	155600000	0.00330425	0.0537103	155560000	155580000	0.986369
Higher LBS in Berkshire	6	155440000	155600000	0.00330425	0.0537103	155440000	155460000	0.986858
Higher LBS in Berkshire	6	155440000	155600000	0.00330425	0.0537103	155580000	155600000	0.989002
Higher LBS in Berkshire	6	161400000	161560000	0.00377068	0.0880254	161400000	161420000	0.997646
Higher LBS in Berkshire	6	161400000	161560000	0.00377068	0.0880254	161420000	161440000	0.995419
Higher LBS in Berkshire	6	161400000	161560000	0.00377068	0.0880254	161440000	161460000	0.986439
Higher LBS in Berkshire	6	161400000	161560000	0.00377068	0.0880254	161460000	161480000	0.992476
Higher LBS in Berkshire	6	161400000	161560000	0.00377068	0.0880254	161500000	161520000	0.990779
Higher LBS in Berkshire	6	161400000	161560000	0.00377068	0.0880254	161520000	161540000	0.989277
Higher LBS in Berkshire	6	161400000	161560000	0.00377068	0.0880254	161540000	161560000	0.991665
Higher LBS in Berkshire	6	161400000	161560000	0.00377068	0.0880254	161480000	161500000	0.992465
Higher LBS in Berkshire	6	164520000	164740000	0.00239454	0.456602	164520000	164540000	0.999631
Higher LBS in Berkshire	6	164520000	164740000	0.00239454	0.456602	164540000	164560000	0.999338
Higher LBS in Berkshire	6	164520000	164740000	0.00239454	0.456602	164560000	164580000	1
Higher LBS in Berkshire	6	164520000	164740000	0.00239454	0.456602	164580000	164600000	1
Higher LBS in Berkshire	6	164520000	164740000	0.00239454	0.456602	164600000	164620000	1
Higher LBS in Berkshire	6	164520000	164740000	0.00239454	0.456602	164640000	164660000	0.999844
Higher LBS in Berkshire	6	164520000	164740000	0.00239454	0.456602	164660000	164680000	0.999788
Higher LBS in Berkshire	6	164520000	164740000	0.00239454	0.456602	164680000	164700000	0.99897
Higher LBS in Berkshire	6	164520000	164740000	0.00239454	0.456602	164700000	164720000	0.994968
Higher LBS in Berkshire	6	164520000	164740000	0.00239454	0.456602	164720000	164740000	0.995625
Higher LBS in Berkshire	6	164520000	164740000	0.00239454	0.456602	164620000	164640000	0.99975
Higher LBS in Berkshire	6	165600000	165780000	0.0135886	0.106396	165600000	165620000	0.987777
Higher LBS in Berkshire	6	165600000	165780000	0.0135886	0.106396	165620000	165640000	0.989093
Higher LBS in Berkshire	6	165600000	165780000	0.0135886	0.106396	165640000	165660000	0.984583
Higher LBS in Berkshire	6	165600000	165780000	0.0135886	0.106396	165680000	165700000	0.990035
Higher LBS in Berkshire	6	165600000	165780000	0.0135886	0.106396	165700000	165720000	0.993529
Higher LBS in Berkshire	6	165600000	165780000	0.0135886	0.106396	165720000	165740000	0.988521
Higher LBS in Berkshire	6	165600000	165780000	0.0135886	0.106396	165740000	165760000	0.989549
Higher LBS in Berkshire	6	165600000	165780000	0.0135886	0.106396	165760000	165780000	0.990414
Higher LBS in Berkshire	6	165600000	165780000	0.0135886	0.106396	165660000	165680000	0.97782
Higher LBS in Berkshire	6	167940000	168020000	0.0275026	0.0832887	167940000	167960000	0.98475
Higher LBS in Berkshire	6	167940000	168020000	0.0275026	0.0832887	167960000	167980000	0.992937
Higher LBS in Berkshire	6	167940000	168020000	0.0275026	0.0832887	167980000	168000000	0.985082
Higher LBS in Berkshire	6	167940000	168020000	0.0275026	0.0832887	168000000	168020000	0.985965
Higher LBS in Berkshire	6	168200000	168300000	0.00106703	0.120592	168200000	168220000	0.994524
Higher LBS in Berkshire	6	168200000	168300000	0.00106703	0.120592	168220000	168240000	0.996244
Higher LBS in Berkshire	6	168200000	168300000	0.00106703	0.120592	168240000	168260000	1
Higher LBS in Berkshire	6	168200000	168300000	0.00106703	0.120592	168260000	168280000	0.995514
Higher LBS in Berkshire	6	168200000	168300000	0.00106703	0.120592	168280000	168300000	0.996979
Higher LBS in Berkshire	6	168320000	168380000	0.0337362	0.0812518	168320000	168340000	0.997457
Higher LBS in Berkshire	6	168320000	168380000	0.0337362	0.0812518	168340000	168360000	0.992258
Higher LBS in Berkshire	6	168320000	168380000	0.0337362	0.0812518	168360000	168380000	0.982988
Higher LBS in Berkshire	6	168780000	168880000	0.00416947	0.0394108	168780000	168800000	0.98965
Higher LBS in Berkshire	6	168780000	168880000	0.00416947	0.0394108	168800000	168820000	0.981452
Higher LBS in Berkshire	6	168780000	168880000	0.00416947	0.0394108	168840000	168860000	0.982751
Higher LBS in Berkshire	6	168780000	168880000	0.00416947	0.0394108	168860000	168880000	0.984692
Higher LBS in Berkshire	6	168780000	168880000	0.00416947	0.0394108	168820000	168840000	0.985404
Higher LBS in Berkshire	6	169620000	169700000	0.0313161	0.0732505	169620000	169640000	0.989283
Higher LBS in Berkshire	6	169620000	169700000	0.0313161	0.0732505	169640000	169660000	0.983921
Higher LBS in Berkshire	6	169620000	169700000	0.0313161	0.0732505	169660000	169680000	0.993459
Higher LBS in Berkshire	6	169620000	169700000	0.0313161	0.0732505	169680000	169700000	0.991867
Higher LBS in Berkshire	6	170240000	170300000	0.0186893	0.0526392	170240000	170260000	0.993676
Higher LBS in Berkshire	6	170240000	170300000	0.0186893	0.0526392	170280000	170300000	0.995343
Higher LBS in Berkshire	6	170240000	170300000	0.0186893	0.0526392	170260000	170280000	0.992865
Higher LBS in Berkshire	7	5420000	5480000	0.0304404	0.0551242	5420000	5440000	0.978832
Higher LBS in Berkshire	7	5420000	5480000	0.0304404	0.0551242	5440000	5460000	0.983675
Higher LBS in Berkshire	7	5420000	5480000	0.0304404	0.0551242	5460000	5480000	0.981483
Higher LBS in Berkshire	7	5520000	5660000	0.0215494	0.081677	5520000	5540000	0.98093
Higher LBS in Berkshire	7	5520000	5660000	0.0215494	0.081677	5540000	5560000	0.990802
Higher LBS in Berkshire	7	5520000	5660000	0.0215494	0.081677	5560000	5580000	0.983405
Higher LBS in Berkshire	7	5520000	5660000	0.0215494	0.081677	5580000	5600000	0.982736
Higher LBS in Berkshire	7	5520000	5660000	0.0215494	0.081677	5600000	5620000	0.982535
Higher LBS in Berkshire	7	5520000	5660000	0.0215494	0.081677	5640000	5660000	0.989183
Higher LBS in Berkshire	7	5520000	5660000	0.0215494	0.081677	5620000	5640000	0.990064
Higher LBS in Berkshire	7	9000000	9120000	0.0124265	0.0651486	9000000	9020000	0.98329
Higher LBS in Berkshire	7	9000000	9120000	0.0124265	0.0651486	9020000	9040000	0.987239
Higher LBS in Berkshire	7	9000000	9120000	0.0124265	0.0651486	9060000	9080000	0.986685
Higher LBS in Berkshire	7	9000000	9120000	0.0124265	0.0651486	9080000	9100000	0.985608
Higher LBS in Berkshire	7	9000000	9120000	0.0124265	0.0651486	9100000	9120000	0.986418
Higher LBS in Berkshire	7	9000000	9120000	0.0124265	0.0651486	9040000	9060000	0.985021
Higher LBS in Berkshire	7	9340000	9720000	0.00650073	0.144627	9340000	9360000	0.980176
Higher LBS in Berkshire	7	9340000	9720000	0.00650073	0.144627	9360000	9380000	0.983023
Higher LBS in Berkshire	7	9340000	9720000	0.00650073	0.144627	9380000	9400000	0.986753
Higher LBS in Berkshire	7	9340000	9720000	0.00650073	0.144627	9400000	9420000	0.986012
Higher LBS in Berkshire	7	9340000	9720000	0.00650073	0.144627	9440000	9460000	0.98139
Higher LBS in Berkshire	7	9340000	9720000	0.00650073	0.144627	9460000	9480000	0.981079
Higher LBS in Berkshire	7	9340000	9720000	0.00650073	0.144627	9480000	9500000	0.983551
Higher LBS in Berkshire	7	9340000	9720000	0.00650073	0.144627	9500000	9520000	0.982786
Higher LBS in Berkshire	7	9340000	9720000	0.00650073	0.144627	9520000	9540000	0.982959
Higher LBS in Berkshire	7	9340000	9720000	0.00650073	0.144627	9540000	9560000	0.974203
Higher LBS in Berkshire	7	9340000	9720000	0.00650073	0.144627	9580000	9600000	0.981085
Higher LBS in Berkshire	7	9340000	9720000	0.00650073	0.144627	9600000	9620000	0.981766
Higher LBS in Berkshire	7	9340000	9720000	0.00650073	0.144627	9620000	9640000	0.980539
Higher LBS in Berkshire	7	9340000	9720000	0.00650073	0.144627	9640000	9660000	0.980203
Higher LBS in Berkshire	7	9340000	9720000	0.00650073	0.144627	9660000	9680000	0.979168
Higher LBS in Berkshire	7	9340000	9720000	0.00650073	0.144627	9700000	9720000	0.982681
Higher LBS in Berkshire	7	9340000	9720000	0.00650073	0.144627	9560000	9580000	0.987124
Higher LBS in Berkshire	7	9340000	9720000	0.00650073	0.144627	9680000	9700000	0.981023
Higher LBS in Berkshire	7	9340000	9720000	0.00650073	0.144627	9420000	9440000	0.984898
Higher LBS in Berkshire	7	12280000	12360000	0.0139646	0.0541909	12280000	12300000	0.984098
Higher LBS in Berkshire	7	12280000	12360000	0.0139646	0.0541909	12300000	12320000	0.98822
Higher LBS in Berkshire	7	12280000	12360000	0.0139646	0.0541909	12340000	12360000	0.986944
Higher LBS in Berkshire	7	12280000	12360000	0.0139646	0.0541909	12320000	12340000	0.986511
Higher LBS in Berkshire	7	24180000	24400000	0.014987	0.317969	24180000	24200000	0.997098
Higher LBS in Berkshire	7	24180000	24400000	0.014987	0.317969	24200000	24220000	0.997643
Higher LBS in Berkshire	7	24180000	24400000	0.014987	0.317969	24220000	24240000	0.997599
Higher LBS in Berkshire	7	24180000	24400000	0.014987	0.317969	24260000	24280000	0.996577
Higher LBS in Berkshire	7	24180000	24400000	0.014987	0.317969	24280000	24300000	0.995154
Higher LBS in Berkshire	7	24180000	24400000	0.014987	0.317969	24300000	24320000	0.995639
Higher LBS in Berkshire	7	24180000	24400000	0.014987	0.317969	24320000	24340000	0.994938
Higher LBS in Berkshire	7	24180000	24400000	0.014987	0.317969	24340000	24360000	0.997595
Higher LBS in Berkshire	7	24180000	24400000	0.014987	0.317969	24380000	24400000	0.997108
Higher LBS in Berkshire	7	24180000	24400000	0.014987	0.317969	24240000	24260000	0.996279
Higher LBS in Berkshire	7	24180000	24400000	0.014987	0.317969	24360000	24380000	0.997189
Higher LBS in Berkshire	7	24760000	24860000	0.0169368	0.248973	24780000	24800000	0.987934
Higher LBS in Berkshire	7	24760000	24860000	0.0169368	0.248973	24800000	24820000	0.993755
Higher LBS in Berkshire	7	24760000	24860000	0.0169368	0.248973	24820000	24840000	0.995111
Higher LBS in Berkshire	7	24760000	24860000	0.0169368	0.248973	24840000	24860000	0.988747
Higher LBS in Berkshire	7	24760000	24860000	0.0169368	0.248973	24760000	24780000	0.993605
Higher LBS in Berkshire	7	30820000	30920000	0.01387	0.0442069	30820000	30840000	0.996271
Higher LBS in Berkshire	7	30820000	30920000	0.01387	0.0442069	30840000	30860000	0.995927
Higher LBS in Berkshire	7	30820000	30920000	0.01387	0.0442069	30860000	30880000	0.996805
Higher LBS in Berkshire	7	30820000	30920000	0.01387	0.0442069	30880000	30900000	0.99724
Higher LBS in Berkshire	7	30820000	30920000	0.01387	0.0442069	30900000	30920000	0.997188
Higher LBS in Berkshire	7	35880000	35980000	0.0172835	0.0561074	35880000	35900000	0.989772
Higher LBS in Berkshire	7	35880000	35980000	0.0172835	0.0561074	35920000	35940000	0.993477
Higher LBS in Berkshire	7	35880000	35980000	0.0172835	0.0561074	35940000	35960000	0.991083
Higher LBS in Berkshire	7	35880000	35980000	0.0172835	0.0561074	35960000	35980000	0.991092
Higher LBS in Berkshire	7	35880000	35980000	0.0172835	0.0561074	35900000	35920000	0.99359
Higher LBS in Berkshire	7	39280000	39340000	0.0241329	0.091789	39280000	39300000	0.991932
Higher LBS in Berkshire	7	39280000	39340000	0.0241329	0.091789	39300000	39320000	0.991938
Higher LBS in Berkshire	7	39280000	39340000	0.0241329	0.091789	39320000	39340000	0.990928
Higher LBS in Berkshire	7	40920000	41040000	0.0150401	0.0808536	40920000	40940000	0.988559
Higher LBS in Berkshire	7	40920000	41040000	0.0150401	0.0808536	40940000	40960000	0.984546
Higher LBS in Berkshire	7	40920000	41040000	0.0150401	0.0808536	40960000	40980000	0.985098
Higher LBS in Berkshire	7	40920000	41040000	0.0150401	0.0808536	40980000	41000000	0.990309
Higher LBS in Berkshire	7	40920000	41040000	0.0150401	0.0808536	41000000	41020000	0.986171
Higher LBS in Berkshire	7	40920000	41040000	0.0150401	0.0808536	41020000	41040000	0.986621
Higher LBS in Berkshire	7	42080000	42140000	0.0227057	0.0463696	42080000	42100000	0.987946
Higher LBS in Berkshire	7	42080000	42140000	0.0227057	0.0463696	42100000	42120000	0.98861
Higher LBS in Berkshire	7	42080000	42140000	0.0227057	0.0463696	42120000	42140000	0.989686
Higher LBS in Berkshire	7	43760000	44060000	0.0154891	0.0919401	43780000	43800000	0.990018
Higher LBS in Berkshire	7	43760000	44060000	0.0154891	0.0919401	43800000	43820000	0.989267
Higher LBS in Berkshire	7	43760000	44060000	0.0154891	0.0919401	43820000	43840000	0.989021
Higher LBS in Berkshire	7	43760000	44060000	0.0154891	0.0919401	43840000	43860000	0.990377
Higher LBS in Berkshire	7	43760000	44060000	0.0154891	0.0919401	43860000	43880000	0.989594
Higher LBS in Berkshire	7	43760000	44060000	0.0154891	0.0919401	43880000	43900000	0.986287
Higher LBS in Berkshire	7	43760000	44060000	0.0154891	0.0919401	43920000	43940000	0.988281
Higher LBS in Berkshire	7	43760000	44060000	0.0154891	0.0919401	43940000	43960000	0.989593
Higher LBS in Berkshire	7	43760000	44060000	0.0154891	0.0919401	43960000	43980000	0.99269
Higher LBS in Berkshire	7	43760000	44060000	0.0154891	0.0919401	43980000	44000000	0.992262
Higher LBS in Berkshire	7	43760000	44060000	0.0154891	0.0919401	44000000	44020000	0.986337
Higher LBS in Berkshire	7	43760000	44060000	0.0154891	0.0919401	44020000	44040000	0.994083
Higher LBS in Berkshire	7	43760000	44060000	0.0154891	0.0919401	43760000	43780000	0.98923
Higher LBS in Berkshire	7	43760000	44060000	0.0154891	0.0919401	43900000	43920000	0.99189
Higher LBS in Berkshire	7	43760000	44060000	0.0154891	0.0919401	44040000	44060000	0.993162
Higher LBS in Berkshire	7	44660000	44720000	0.039366	0.0523399	44660000	44680000	0.987818
Higher LBS in Berkshire	7	44660000	44720000	0.039366	0.0523399	44700000	44720000	0.98765
Higher LBS in Berkshire	7	44660000	44720000	0.039366	0.0523399	44680000	44700000	0.985101
Higher LBS in Berkshire	7	46140000	46240000	0.0121326	0.064734	46140000	46160000	0.990759
Higher LBS in Berkshire	7	46140000	46240000	0.0121326	0.064734	46160000	46180000	0.990404
Higher LBS in Berkshire	7	46140000	46240000	0.0121326	0.064734	46180000	46200000	0.992233
Higher LBS in Berkshire	7	46140000	46240000	0.0121326	0.064734	46200000	46220000	0.991648
Higher LBS in Berkshire	7	46140000	46240000	0.0121326	0.064734	46220000	46240000	0.987832
Higher LBS in Berkshire	7	54120000	54380000	0.000127028	0.143968	54140000	54160000	0.984882
Higher LBS in Berkshire	7	54120000	54380000	0.000127028	0.143968	54160000	54180000	0.985575
Higher LBS in Berkshire	7	54120000	54380000	0.000127028	0.143968	54180000	54200000	0.979921
Higher LBS in Berkshire	7	54120000	54380000	0.000127028	0.143968	54200000	54220000	0.98386
Higher LBS in Berkshire	7	54120000	54380000	0.000127028	0.143968	54220000	54240000	0.990091
Higher LBS in Berkshire	7	54120000	54380000	0.000127028	0.143968	54240000	54260000	0.989557
Higher LBS in Berkshire	7	54120000	54380000	0.000127028	0.143968	54280000	54300000	0.989531
Higher LBS in Berkshire	7	54120000	54380000	0.000127028	0.143968	54300000	54320000	0.992592
Higher LBS in Berkshire	7	54120000	54380000	0.000127028	0.143968	54320000	54340000	0.990772
Higher LBS in Berkshire	7	54120000	54380000	0.000127028	0.143968	54340000	54360000	0.994342
Higher LBS in Berkshire	7	54120000	54380000	0.000127028	0.143968	54360000	54380000	0.993071
Higher LBS in Berkshire	7	54120000	54380000	0.000127028	0.143968	54120000	54140000	0.983989
Higher LBS in Berkshire	7	54120000	54380000	0.000127028	0.143968	54260000	54280000	0.991173
Higher LBS in Berkshire	7	59280000	59380000	0.0263439	0.0453806	59280000	59300000	0.99835
Higher LBS in Berkshire	7	59280000	59380000	0.0263439	0.0453806	59300000	59320000	0.992966
Higher LBS in Berkshire	7	59280000	59380000	0.0263439	0.0453806	59320000	59340000	0.996945
Higher LBS in Berkshire	7	59280000	59380000	0.0263439	0.0453806	59340000	59360000	0.996032
Higher LBS in Berkshire	7	59280000	59380000	0.0263439	0.0453806	59360000	59380000	0.994816
Higher LBS in Berkshire	7	73320000	73400000	0.0221219	0.0752111	73320000	73340000	0.994009
Higher LBS in Berkshire	7	73320000	73400000	0.0221219	0.0752111	73340000	73360000	0.996063
Higher LBS in Berkshire	7	73320000	73400000	0.0221219	0.0752111	73360000	73380000	0.992413
Higher LBS in Berkshire	7	73320000	73400000	0.0221219	0.0752111	73380000	73400000	0.994338
Higher LBS in Berkshire	7	85980000	86040000	0.00994578	0.0569635	86000000	86020000	0.993509
Higher LBS in Berkshire	7	85980000	86040000	0.00994578	0.0569635	86020000	86040000	0.993863
Higher LBS in Berkshire	7	85980000	86040000	0.00994578	0.0569635	85980000	86000000	0.991421
Higher LBS in Berkshire	7	86380000	86580000	0.0123294	0.128569	86380000	86400000	0.99083
Higher LBS in Berkshire	7	86380000	86580000	0.0123294	0.128569	86400000	86420000	0.991999
Higher LBS in Berkshire	7	86380000	86580000	0.0123294	0.128569	86420000	86440000	0.995635
Higher LBS in Berkshire	7	86380000	86580000	0.0123294	0.128569	86440000	86460000	0.994646
Higher LBS in Berkshire	7	86380000	86580000	0.0123294	0.128569	86460000	86480000	0.98926
Higher LBS in Berkshire	7	86380000	86580000	0.0123294	0.128569	86480000	86500000	0.991147
Higher LBS in Berkshire	7	86380000	86580000	0.0123294	0.128569	86520000	86540000	0.995522
Higher LBS in Berkshire	7	86380000	86580000	0.0123294	0.128569	86540000	86560000	0.992054
Higher LBS in Berkshire	7	86380000	86580000	0.0123294	0.128569	86560000	86580000	0.992161
Higher LBS in Berkshire	7	86380000	86580000	0.0123294	0.128569	86500000	86520000	0.991078
Higher LBS in Berkshire	7	87480000	87560000	0.0272563	0.060731	87480000	87500000	0.99308
Higher LBS in Berkshire	7	87480000	87560000	0.0272563	0.060731	87500000	87520000	0.992868
Higher LBS in Berkshire	7	87480000	87560000	0.0272563	0.060731	87520000	87540000	0.989934
Higher LBS in Berkshire	7	87480000	87560000	0.0272563	0.060731	87540000	87560000	0.990736
Higher LBS in Berkshire	7	91980000	92040000	0.0303257	0.0253582	91980000	92000000	0.994734
Higher LBS in Berkshire	7	91980000	92040000	0.0303257	0.0253582	92020000	92040000	0.993451
Higher LBS in Berkshire	7	91980000	92040000	0.0303257	0.0253582	92000000	92020000	0.993947
Higher LBS in Berkshire	7	92320000	92460000	0.0146002	0.0385088	92320000	92340000	0.990934
Higher LBS in Berkshire	7	92320000	92460000	0.0146002	0.0385088	92340000	92360000	0.992971
Higher LBS in Berkshire	7	92320000	92460000	0.0146002	0.0385088	92360000	92380000	0.988529
Higher LBS in Berkshire	7	92320000	92460000	0.0146002	0.0385088	92380000	92400000	0.989138
Higher LBS in Berkshire	7	92320000	92460000	0.0146002	0.0385088	92420000	92440000	0.983901
Higher LBS in Berkshire	7	92320000	92460000	0.0146002	0.0385088	92440000	92460000	0.990066
Higher LBS in Berkshire	7	92320000	92460000	0.0146002	0.0385088	92400000	92420000	0.987054
Higher LBS in Berkshire	7	92960000	93180000	0.0233075	0.0747241	92960000	92980000	0.985051
Higher LBS in Berkshire	7	92960000	93180000	0.0233075	0.0747241	92980000	93000000	0.986766
Higher LBS in Berkshire	7	92960000	93180000	0.0233075	0.0747241	93000000	93020000	0.985289
Higher LBS in Berkshire	7	92960000	93180000	0.0233075	0.0747241	93020000	93040000	0.984362
Higher LBS in Berkshire	7	92960000	93180000	0.0233075	0.0747241	93040000	93060000	0.984017
Higher LBS in Berkshire	7	92960000	93180000	0.0233075	0.0747241	93080000	93100000	0.991997
Higher LBS in Berkshire	7	92960000	93180000	0.0233075	0.0747241	93100000	93120000	0.996914
Higher LBS in Berkshire	7	92960000	93180000	0.0233075	0.0747241	93120000	93140000	0.98815
Higher LBS in Berkshire	7	92960000	93180000	0.0233075	0.0747241	93140000	93160000	0.992316
Higher LBS in Berkshire	7	92960000	93180000	0.0233075	0.0747241	93160000	93180000	0.986145
Higher LBS in Berkshire	7	92960000	93180000	0.0233075	0.0747241	93060000	93080000	0.990347
Higher LBS in Berkshire	7	103260000	103380000	0.01239	0.0828014	103260000	103280000	0.995021
Higher LBS in Berkshire	7	103260000	103380000	0.01239	0.0828014	103300000	103320000	0.986941
Higher LBS in Berkshire	7	103260000	103380000	0.01239	0.0828014	103320000	103340000	0.99159
Higher LBS in Berkshire	7	103260000	103380000	0.01239	0.0828014	103340000	103360000	0.990459
Higher LBS in Berkshire	7	103260000	103380000	0.01239	0.0828014	103360000	103380000	0.989325
Higher LBS in Berkshire	7	103260000	103380000	0.01239	0.0828014	103280000	103300000	0.98669
Higher LBS in Berkshire	7	115520000	115940000	0.00230406	0.0516119	115520000	115540000	0.982928
Higher LBS in Berkshire	7	115520000	115940000	0.00230406	0.0516119	115540000	115560000	0.98603
Higher LBS in Berkshire	7	115520000	115940000	0.00230406	0.0516119	115560000	115580000	0.986837
Higher LBS in Berkshire	7	115520000	115940000	0.00230406	0.0516119	115580000	115600000	0.984003
Higher LBS in Berkshire	7	115520000	115940000	0.00230406	0.0516119	115620000	115640000	0.985909
Higher LBS in Berkshire	7	115520000	115940000	0.00230406	0.0516119	115640000	115660000	0.980067
Higher LBS in Berkshire	7	115520000	115940000	0.00230406	0.0516119	115660000	115680000	0.986884
Higher LBS in Berkshire	7	115520000	115940000	0.00230406	0.0516119	115680000	115700000	0.981459
Higher LBS in Berkshire	7	115520000	115940000	0.00230406	0.0516119	115700000	115720000	0.986979
Higher LBS in Berkshire	7	115520000	115940000	0.00230406	0.0516119	115740000	115760000	0.987106
Higher LBS in Berkshire	7	115520000	115940000	0.00230406	0.0516119	115760000	115780000	0.98473
Higher LBS in Berkshire	7	115520000	115940000	0.00230406	0.0516119	115780000	115800000	0.985917
Higher LBS in Berkshire	7	115520000	115940000	0.00230406	0.0516119	115800000	115820000	0.984294
Higher LBS in Berkshire	7	115520000	115940000	0.00230406	0.0516119	115820000	115840000	0.991997
Higher LBS in Berkshire	7	115520000	115940000	0.00230406	0.0516119	115840000	115860000	0.995207
Higher LBS in Berkshire	7	115520000	115940000	0.00230406	0.0516119	115880000	115900000	0.99104
Higher LBS in Berkshire	7	115520000	115940000	0.00230406	0.0516119	115900000	115920000	0.985582
Higher LBS in Berkshire	7	115520000	115940000	0.00230406	0.0516119	115920000	115940000	0.991824
Higher LBS in Berkshire	7	115520000	115940000	0.00230406	0.0516119	115600000	115620000	0.985777
Higher LBS in Berkshire	7	115520000	115940000	0.00230406	0.0516119	115720000	115740000	0.995154
Higher LBS in Berkshire	7	115520000	115940000	0.00230406	0.0516119	115860000	115880000	0.987908
Higher LBS in Berkshire	7	119760000	119840000	0.0276654	0.0363988	119760000	119780000	0.988883
Higher LBS in Berkshire	7	119760000	119840000	0.0276654	0.0363988	119800000	119820000	0.983667
Higher LBS in Berkshire	7	119760000	119840000	0.0276654	0.0363988	119820000	119840000	0.995497
Higher LBS in Berkshire	7	119760000	119840000	0.0276654	0.0363988	119780000	119800000	0.991643
Higher LBS in Berkshire	7	120800000	120860000	0.0472151	0.0351042	120800000	120820000	0.986336
Higher LBS in Berkshire	7	120800000	120860000	0.0472151	0.0351042	120820000	120840000	0.991049
Higher LBS in Berkshire	7	120800000	120860000	0.0472151	0.0351042	120840000	120860000	0.98031
Higher LBS in Berkshire	8	11680000	11760000	0.0239086	0.054861	11680000	11700000	0.990427
Higher LBS in Berkshire	8	11680000	11760000	0.0239086	0.054861	11700000	11720000	0.98354
Higher LBS in Berkshire	8	11680000	11760000	0.0239086	0.054861	11720000	11740000	0.990165
Higher LBS in Berkshire	8	11680000	11760000	0.0239086	0.054861	11740000	11760000	0.986669
Higher LBS in Berkshire	8	18620000	18740000	0.0271998	0.049787	18620000	18640000	0.987791
Higher LBS in Berkshire	8	18620000	18740000	0.0271998	0.049787	18640000	18660000	0.984582
Higher LBS in Berkshire	8	18620000	18740000	0.0271998	0.049787	18660000	18680000	0.988997
Higher LBS in Berkshire	8	18620000	18740000	0.0271998	0.049787	18680000	18700000	0.987904
Higher LBS in Berkshire	8	18620000	18740000	0.0271998	0.049787	18700000	18720000	0.987918
Higher LBS in Berkshire	8	18620000	18740000	0.0271998	0.049787	18720000	18740000	0.98065
Higher LBS in Berkshire	8	23960000	24100000	0.00314011	0.0888311	23960000	23980000	0.994611
Higher LBS in Berkshire	8	23960000	24100000	0.00314011	0.0888311	24000000	24020000	0.997758
Higher LBS in Berkshire	8	23960000	24100000	0.00314011	0.0888311	24020000	24040000	0.996612
Higher LBS in Berkshire	8	23960000	24100000	0.00314011	0.0888311	24040000	24060000	0.989014
Higher LBS in Berkshire	8	23960000	24100000	0.00314011	0.0888311	24060000	24080000	0.981982
Higher LBS in Berkshire	8	23960000	24100000	0.00314011	0.0888311	24080000	24100000	0.997402
Higher LBS in Berkshire	8	23960000	24100000	0.00314011	0.0888311	23980000	24000000	0.995082
Higher LBS in Berkshire	8	27580000	27700000	0.0226473	0.0695628	27580000	27600000	0.994667
Higher LBS in Berkshire	8	27580000	27700000	0.0226473	0.0695628	27600000	27620000	0.991751
Higher LBS in Berkshire	8	27580000	27700000	0.0226473	0.0695628	27620000	27640000	0.993417
Higher LBS in Berkshire	8	27580000	27700000	0.0226473	0.0695628	27660000	27680000	0.992016
Higher LBS in Berkshire	8	27580000	27700000	0.0226473	0.0695628	27680000	27700000	0.99823
Higher LBS in Berkshire	8	27580000	27700000	0.0226473	0.0695628	27640000	27660000	0.993271
Higher LBS in Berkshire	8	28440000	28520000	0.0429737	0.076268	28460000	28480000	0.992882
Higher LBS in Berkshire	8	28440000	28520000	0.0429737	0.076268	28480000	28500000	0.994029
Higher LBS in Berkshire	8	28440000	28520000	0.0429737	0.076268	28500000	28520000	0.995668
Higher LBS in Berkshire	8	28440000	28520000	0.0429737	0.076268	28440000	28460000	0.99573
Higher LBS in Berkshire	8	29420000	29480000	0.0149011	0.0291925	29420000	29440000	0.992461
Higher LBS in Berkshire	8	29420000	29480000	0.0149011	0.0291925	29440000	29460000	0.989391
Higher LBS in Berkshire	8	29420000	29480000	0.0149011	0.0291925	29460000	29480000	0.994187
Higher LBS in Berkshire	8	32460000	32520000	0.0197151	0.0281093	32460000	32480000	0.989781
Higher LBS in Berkshire	8	32460000	32520000	0.0197151	0.0281093	32480000	32500000	0.993591
Higher LBS in Berkshire	8	32460000	32520000	0.0197151	0.0281093	32500000	32520000	0.991553
Higher LBS in Berkshire	8	35060000	35300000	0.00212936	0.112403	35060000	35080000	0.995757
Higher LBS in Berkshire	8	35060000	35300000	0.00212936	0.112403	35080000	35100000	0.995754
Higher LBS in Berkshire	8	35060000	35300000	0.00212936	0.112403	35100000	35120000	0.993831
Higher LBS in Berkshire	8	35060000	35300000	0.00212936	0.112403	35140000	35160000	0.995113
Higher LBS in Berkshire	8	35060000	35300000	0.00212936	0.112403	35160000	35180000	0.99632
Higher LBS in Berkshire	8	35060000	35300000	0.00212936	0.112403	35180000	35200000	0.998063
Higher LBS in Berkshire	8	35060000	35300000	0.00212936	0.112403	35200000	35220000	0.996436
Higher LBS in Berkshire	8	35060000	35300000	0.00212936	0.112403	35220000	35240000	0.990594
Higher LBS in Berkshire	8	35060000	35300000	0.00212936	0.112403	35260000	35280000	0.993562
Higher LBS in Berkshire	8	35060000	35300000	0.00212936	0.112403	35280000	35300000	0.992745
Higher LBS in Berkshire	8	35060000	35300000	0.00212936	0.112403	35120000	35140000	0.994589
Higher LBS in Berkshire	8	35060000	35300000	0.00212936	0.112403	35240000	35260000	0.993679
Higher LBS in Berkshire	8	41160000	41300000	0.00270107	0.0426528	41160000	41180000	0.990131
Higher LBS in Berkshire	8	41160000	41300000	0.00270107	0.0426528	41180000	41200000	0.987743
Higher LBS in Berkshire	8	41160000	41300000	0.00270107	0.0426528	41200000	41220000	0.986809
Higher LBS in Berkshire	8	41160000	41300000	0.00270107	0.0426528	41220000	41240000	0.987583
Higher LBS in Berkshire	8	41160000	41300000	0.00270107	0.0426528	41240000	41260000	0.989507
Higher LBS in Berkshire	8	41160000	41300000	0.00270107	0.0426528	41260000	41280000	0.985865
Higher LBS in Berkshire	8	41160000	41300000	0.00270107	0.0426528	41280000	41300000	0.983311
Higher LBS in Berkshire	8	56540000	56600000	0.0284859	0.101991	56540000	56560000	0.998134
Higher LBS in Berkshire	8	56540000	56600000	0.0284859	0.101991	56560000	56580000	0.998091
Higher LBS in Berkshire	8	56540000	56600000	0.0284859	0.101991	56580000	56600000	0.998226
Higher LBS in Berkshire	8	59940000	60120000	0.037666	0.0478613	59940000	59960000	0.995742
Higher LBS in Berkshire	8	59940000	60120000	0.037666	0.0478613	59960000	59980000	0.994559
Higher LBS in Berkshire	8	59940000	60120000	0.037666	0.0478613	59980000	60000000	0.998813
Higher LBS in Berkshire	8	59940000	60120000	0.037666	0.0478613	60000000	60020000	0.997826
Higher LBS in Berkshire	8	59940000	60120000	0.037666	0.0478613	60040000	60060000	0.998894
Higher LBS in Berkshire	8	59940000	60120000	0.037666	0.0478613	60060000	60080000	0.998594
Higher LBS in Berkshire	8	59940000	60120000	0.037666	0.0478613	60080000	60100000	0.996097
Higher LBS in Berkshire	8	59940000	60120000	0.037666	0.0478613	60100000	60120000	0.99728
Higher LBS in Berkshire	8	59940000	60120000	0.037666	0.0478613	60020000	60040000	0.996761
Higher LBS in Berkshire	8	65380000	65480000	0.0202985	0.0978963	65380000	65400000	0.996856
Higher LBS in Berkshire	8	65380000	65480000	0.0202985	0.0978963	65420000	65440000	0.996348
Higher LBS in Berkshire	8	65380000	65480000	0.0202985	0.0978963	65440000	65460000	0.997132
Higher LBS in Berkshire	8	65380000	65480000	0.0202985	0.0978963	65460000	65480000	0.997204
Higher LBS in Berkshire	8	65380000	65480000	0.0202985	0.0978963	65400000	65420000	0.995312
Higher LBS in Berkshire	8	66000000	66080000	0.0227014	0.105216	66000000	66020000	0.998027
Higher LBS in Berkshire	8	66000000	66080000	0.0227014	0.105216	66020000	66040000	0.997608
Higher LBS in Berkshire	8	66000000	66080000	0.0227014	0.105216	66040000	66060000	0.997007
Higher LBS in Berkshire	8	66000000	66080000	0.0227014	0.105216	66060000	66080000	0.995964
Higher LBS in Berkshire	8	66480000	66700000	0.000105583	0.332571	66480000	66500000	0.99925
Higher LBS in Berkshire	8	66480000	66700000	0.000105583	0.332571	66500000	66520000	0.999763
Higher LBS in Berkshire	8	66480000	66700000	0.000105583	0.332571	66520000	66540000	0.999313
Higher LBS in Berkshire	8	66480000	66700000	0.000105583	0.332571	66540000	66560000	0.999681
Higher LBS in Berkshire	8	66480000	66700000	0.000105583	0.332571	66560000	66580000	0.998294
Higher LBS in Berkshire	8	66480000	66700000	0.000105583	0.332571	66600000	66620000	0.983998
Higher LBS in Berkshire	8	66480000	66700000	0.000105583	0.332571	66620000	66640000	0.992681
Higher LBS in Berkshire	8	66480000	66700000	0.000105583	0.332571	66640000	66660000	0.995546
Higher LBS in Berkshire	8	66480000	66700000	0.000105583	0.332571	66660000	66680000	0.999075
Higher LBS in Berkshire	8	66480000	66700000	0.000105583	0.332571	66680000	66700000	0.998595
Higher LBS in Berkshire	8	66480000	66700000	0.000105583	0.332571	66580000	66600000	0.997788
Higher LBS in Berkshire	8	68300000	68380000	0.0109169	0.0609913	68300000	68320000	0.997653
Higher LBS in Berkshire	8	68300000	68380000	0.0109169	0.0609913	68320000	68340000	0.995817
Higher LBS in Berkshire	8	68300000	68380000	0.0109169	0.0609913	68340000	68360000	0.995405
Higher LBS in Berkshire	8	68300000	68380000	0.0109169	0.0609913	68360000	68380000	0.998425
Higher LBS in Berkshire	8	71860000	71940000	0.0213213	0.0571091	71860000	71880000	0.980574
Higher LBS in Berkshire	8	71860000	71940000	0.0213213	0.0571091	71880000	71900000	0.982697
Higher LBS in Berkshire	8	71860000	71940000	0.0213213	0.0571091	71900000	71920000	0.983708
Higher LBS in Berkshire	8	71860000	71940000	0.0213213	0.0571091	71920000	71940000	0.993163
Higher LBS in Berkshire	8	73800000	73880000	0.0326853	0.0727826	73800000	73820000	0.987243
Higher LBS in Berkshire	8	73800000	73880000	0.0326853	0.0727826	73820000	73840000	0.995316
Higher LBS in Berkshire	8	73800000	73880000	0.0326853	0.0727826	73840000	73860000	0.992045
Higher LBS in Berkshire	8	73800000	73880000	0.0326853	0.0727826	73860000	73880000	0.995252
Higher LBS in Berkshire	8	76780000	76900000	0.0122702	0.0836919	76780000	76800000	0.987877
Higher LBS in Berkshire	8	76780000	76900000	0.0122702	0.0836919	76820000	76840000	0.992833
Higher LBS in Berkshire	8	76780000	76900000	0.0122702	0.0836919	76840000	76860000	0.988935
Higher LBS in Berkshire	8	76780000	76900000	0.0122702	0.0836919	76860000	76880000	0.99227
Higher LBS in Berkshire	8	76780000	76900000	0.0122702	0.0836919	76880000	76900000	0.987157
Higher LBS in Berkshire	8	76780000	76900000	0.0122702	0.0836919	76800000	76820000	0.990619
Higher LBS in Berkshire	8	81880000	82120000	0.0196822	0.0630627	81880000	81900000	0.991005
Higher LBS in Berkshire	8	81880000	82120000	0.0196822	0.0630627	81900000	81920000	0.995579
Higher LBS in Berkshire	8	81880000	82120000	0.0196822	0.0630627	81920000	81940000	0.990241
Higher LBS in Berkshire	8	81880000	82120000	0.0196822	0.0630627	81940000	81960000	0.994948
Higher LBS in Berkshire	8	81880000	82120000	0.0196822	0.0630627	81960000	81980000	0.993744
Higher LBS in Berkshire	8	81880000	82120000	0.0196822	0.0630627	81980000	82000000	0.990672
Higher LBS in Berkshire	8	81880000	82120000	0.0196822	0.0630627	82000000	82020000	0.993184
Higher LBS in Berkshire	8	81880000	82120000	0.0196822	0.0630627	82020000	82040000	0.994646
Higher LBS in Berkshire	8	81880000	82120000	0.0196822	0.0630627	82060000	82080000	0.987093
Higher LBS in Berkshire	8	81880000	82120000	0.0196822	0.0630627	82080000	82100000	0.988344
Higher LBS in Berkshire	8	81880000	82120000	0.0196822	0.0630627	82100000	82120000	0.992814
Higher LBS in Berkshire	8	81880000	82120000	0.0196822	0.0630627	82040000	82060000	0.996678
Higher LBS in Berkshire	8	85060000	85120000	0.0293299	0.0243163	85080000	85100000	0.994819
Higher LBS in Berkshire	8	85060000	85120000	0.0293299	0.0243163	85100000	85120000	0.994095
Higher LBS in Berkshire	8	85060000	85120000	0.0293299	0.0243163	85060000	85080000	0.993239
Higher LBS in Berkshire	8	88400000	88620000	0.00561981	0.0681461	88400000	88420000	0.991541
Higher LBS in Berkshire	8	88400000	88620000	0.00561981	0.0681461	88420000	88440000	0.995134
Higher LBS in Berkshire	8	88400000	88620000	0.00561981	0.0681461	88440000	88460000	0.995359
Higher LBS in Berkshire	8	88400000	88620000	0.00561981	0.0681461	88480000	88500000	0.989933
Higher LBS in Berkshire	8	88400000	88620000	0.00561981	0.0681461	88500000	88520000	0.991681
Higher LBS in Berkshire	8	88400000	88620000	0.00561981	0.0681461	88520000	88540000	0.995228
Higher LBS in Berkshire	8	88400000	88620000	0.00561981	0.0681461	88540000	88560000	0.989033
Higher LBS in Berkshire	8	88400000	88620000	0.00561981	0.0681461	88560000	88580000	0.991848
Higher LBS in Berkshire	8	88400000	88620000	0.00561981	0.0681461	88580000	88600000	0.995208
Higher LBS in Berkshire	8	88400000	88620000	0.00561981	0.0681461	88460000	88480000	0.993181
Higher LBS in Berkshire	8	88400000	88620000	0.00561981	0.0681461	88600000	88620000	0.99624
Higher LBS in Berkshire	8	89080000	89220000	0.0247878	0.0940486	89080000	89100000	0.993489
Higher LBS in Berkshire	8	89080000	89220000	0.0247878	0.0940486	89100000	89120000	0.995248
Higher LBS in Berkshire	8	89080000	89220000	0.0247878	0.0940486	89140000	89160000	0.992457
Higher LBS in Berkshire	8	89080000	89220000	0.0247878	0.0940486	89160000	89180000	0.987653
Higher LBS in Berkshire	8	89080000	89220000	0.0247878	0.0940486	89180000	89200000	0.993715
Higher LBS in Berkshire	8	89080000	89220000	0.0247878	0.0940486	89200000	89220000	0.988298
Higher LBS in Berkshire	8	89080000	89220000	0.0247878	0.0940486	89120000	89140000	0.996902
Higher LBS in Berkshire	8	91200000	91380000	0.0148383	0.0754518	91200000	91220000	0.998951
Higher LBS in Berkshire	8	91200000	91380000	0.0148383	0.0754518	91240000	91260000	0.995861
Higher LBS in Berkshire	8	91200000	91380000	0.0148383	0.0754518	91260000	91280000	0.986652
Higher LBS in Berkshire	8	91200000	91380000	0.0148383	0.0754518	91280000	91300000	0.990457
Higher LBS in Berkshire	8	91200000	91380000	0.0148383	0.0754518	91300000	91320000	0.990817
Higher LBS in Berkshire	8	91200000	91380000	0.0148383	0.0754518	91320000	91340000	0.992922
Higher LBS in Berkshire	8	91200000	91380000	0.0148383	0.0754518	91360000	91380000	0.992484
Higher LBS in Berkshire	8	91200000	91380000	0.0148383	0.0754518	91340000	91360000	0.993162
Higher LBS in Berkshire	8	91200000	91380000	0.0148383	0.0754518	91220000	91240000	0.998191
Higher LBS in Berkshire	8	94580000	94660000	0.00373685	0.0507733	94580000	94600000	0.998619
Higher LBS in Berkshire	8	94580000	94660000	0.00373685	0.0507733	94600000	94620000	0.998507
Higher LBS in Berkshire	8	94580000	94660000	0.00373685	0.0507733	94640000	94660000	0.997108
Higher LBS in Berkshire	8	94580000	94660000	0.00373685	0.0507733	94620000	94640000	0.998557
Higher LBS in Berkshire	8	98320000	98420000	0.0171419	0.080885	98320000	98340000	0.995997
Higher LBS in Berkshire	8	98320000	98420000	0.0171419	0.080885	98340000	98360000	0.998454
Higher LBS in Berkshire	8	98320000	98420000	0.0171419	0.080885	98360000	98380000	0.997359
Higher LBS in Berkshire	8	98320000	98420000	0.0171419	0.080885	98380000	98400000	0.997219
Higher LBS in Berkshire	8	98320000	98420000	0.0171419	0.080885	98400000	98420000	0.996642
Higher LBS in Berkshire	8	99980000	100040000	0.0334575	0.0493317	99980000	100000000	0.995779
Higher LBS in Berkshire	8	99980000	100040000	0.0334575	0.0493317	100020000	100040000	0.990869
Higher LBS in Berkshire	8	99980000	100040000	0.0334575	0.0493317	100000000	100020000	0.995012
Higher LBS in Berkshire	8	110000000	110060000	0.017254	0.0512664	110000000	110020000	0.987506
Higher LBS in Berkshire	8	110000000	110060000	0.017254	0.0512664	110020000	110040000	0.990758
Higher LBS in Berkshire	8	110000000	110060000	0.017254	0.0512664	110040000	110060000	0.989063
Higher LBS in Berkshire	8	111100000	111180000	0.0319149	0.0251541	111100000	111120000	0.99309
Higher LBS in Berkshire	8	111100000	111180000	0.0319149	0.0251541	111120000	111140000	0.987167
Higher LBS in Berkshire	8	111100000	111180000	0.0319149	0.0251541	111160000	111180000	0.993872
Higher LBS in Berkshire	8	111100000	111180000	0.0319149	0.0251541	111140000	111160000	0.99509
Higher LBS in Berkshire	8	113160000	113240000	0.0339621	0.0460152	113160000	113180000	0.994965
Higher LBS in Berkshire	8	113160000	113240000	0.0339621	0.0460152	113180000	113200000	0.996563
Higher LBS in Berkshire	8	113160000	113240000	0.0339621	0.0460152	113200000	113220000	0.994354
Higher LBS in Berkshire	8	113160000	113240000	0.0339621	0.0460152	113220000	113240000	0.994868
Higher LBS in Berkshire	8	113600000	113660000	0.0033899	0.0263767	113600000	113620000	0.991522
Higher LBS in Berkshire	8	113600000	113660000	0.0033899	0.0263767	113640000	113660000	0.995038
Higher LBS in Berkshire	8	113600000	113660000	0.0033899	0.0263767	113620000	113640000	0.996738
Higher LBS in Berkshire	8	114840000	115060000	0.00318721	0.157804	114840000	114860000	0.987037
Higher LBS in Berkshire	8	114840000	115060000	0.00318721	0.157804	114860000	114880000	0.992104
Higher LBS in Berkshire	8	114840000	115060000	0.00318721	0.157804	114880000	114900000	0.99684
Higher LBS in Berkshire	8	114840000	115060000	0.00318721	0.157804	114900000	114920000	0.996664
Higher LBS in Berkshire	8	114840000	115060000	0.00318721	0.157804	114920000	114940000	0.993491
Higher LBS in Berkshire	8	114840000	115060000	0.00318721	0.157804	114960000	114980000	0.994653
Higher LBS in Berkshire	8	114840000	115060000	0.00318721	0.157804	114980000	115000000	0.990044
Higher LBS in Berkshire	8	114840000	115060000	0.00318721	0.157804	115000000	115020000	0.985393
Higher LBS in Berkshire	8	114840000	115060000	0.00318721	0.157804	115020000	115040000	0.985371
Higher LBS in Berkshire	8	114840000	115060000	0.00318721	0.157804	115040000	115060000	0.994819
Higher LBS in Berkshire	8	114840000	115060000	0.00318721	0.157804	114940000	114960000	0.994319
Higher LBS in Berkshire	8	115620000	115740000	0.0061578	0.0974388	115620000	115640000	0.9913
Higher LBS in Berkshire	8	115620000	115740000	0.0061578	0.0974388	115640000	115660000	0.988844
Higher LBS in Berkshire	8	115620000	115740000	0.0061578	0.0974388	115660000	115680000	0.987089
Higher LBS in Berkshire	8	115620000	115740000	0.0061578	0.0974388	115680000	115700000	0.988173
Higher LBS in Berkshire	8	115620000	115740000	0.0061578	0.0974388	115700000	115720000	0.990149
Higher LBS in Berkshire	8	115620000	115740000	0.0061578	0.0974388	115720000	115740000	0.989992
Higher LBS in Berkshire	8	117560000	117620000	0.0154002	0.119173	117580000	117600000	0.999194
Higher LBS in Berkshire	8	117560000	117620000	0.0154002	0.119173	117600000	117620000	1
Higher LBS in Berkshire	8	117560000	117620000	0.0154002	0.119173	117560000	117580000	0.9988
Higher LBS in Berkshire	8	122800000	122980000	0.0178931	0.0621417	122820000	122840000	0.992403
Higher LBS in Berkshire	8	122800000	122980000	0.0178931	0.0621417	122840000	122860000	0.989771
Higher LBS in Berkshire	8	122800000	122980000	0.0178931	0.0621417	122860000	122880000	0.98798
Higher LBS in Berkshire	8	122800000	122980000	0.0178931	0.0621417	122880000	122900000	0.988069
Higher LBS in Berkshire	8	122800000	122980000	0.0178931	0.0621417	122900000	122920000	0.984869
Higher LBS in Berkshire	8	122800000	122980000	0.0178931	0.0621417	122920000	122940000	0.984271
Higher LBS in Berkshire	8	122800000	122980000	0.0178931	0.0621417	122960000	122980000	0.991584
Higher LBS in Berkshire	8	122800000	122980000	0.0178931	0.0621417	122800000	122820000	0.990016
Higher LBS in Berkshire	8	122800000	122980000	0.0178931	0.0621417	122940000	122960000	0.988194
Higher LBS in Berkshire	8	129520000	129600000	0.0111738	0.0574014	129520000	129540000	0.983082
Higher LBS in Berkshire	8	129520000	129600000	0.0111738	0.0574014	129540000	129560000	0.982671
Higher LBS in Berkshire	8	129520000	129600000	0.0111738	0.0574014	129560000	129580000	0.986087
Higher LBS in Berkshire	8	129520000	129600000	0.0111738	0.0574014	129580000	129600000	0.98243
Higher LBS in Berkshire	8	130060000	130120000	0.0322111	0.047007	130060000	130080000	0.984835
Higher LBS in Berkshire	8	130060000	130120000	0.0322111	0.047007	130080000	130100000	0.9845
Higher LBS in Berkshire	8	130060000	130120000	0.0322111	0.047007	130100000	130120000	0.975937
Higher LBS in Berkshire	8	130940000	131000000	0.0215901	0.0864469	130960000	130980000	0.992285
Higher LBS in Berkshire	8	130940000	131000000	0.0215901	0.0864469	130980000	131000000	0.988716
Higher LBS in Berkshire	8	130940000	131000000	0.0215901	0.0864469	130940000	130960000	0.986156
Higher LBS in Berkshire	8	131140000	131240000	0.0202463	0.0785522	131140000	131160000	0.984201
Higher LBS in Berkshire	8	131140000	131240000	0.0202463	0.0785522	131160000	131180000	0.983512
Higher LBS in Berkshire	8	131140000	131240000	0.0202463	0.0785522	131180000	131200000	0.986521
Higher LBS in Berkshire	8	131140000	131240000	0.0202463	0.0785522	131220000	131240000	0.988099
Higher LBS in Berkshire	8	131140000	131240000	0.0202463	0.0785522	131200000	131220000	0.991296
Higher LBS in Berkshire	8	131660000	131720000	0.0252187	0.0410723	131660000	131680000	0.991764
Higher LBS in Berkshire	8	131660000	131720000	0.0252187	0.0410723	131680000	131700000	0.991073
Higher LBS in Berkshire	8	131660000	131720000	0.0252187	0.0410723	131700000	131720000	0.986305
Higher LBS in Berkshire	8	134980000	135100000	0.0214374	0.0969721	134980000	135000000	0.992379
Higher LBS in Berkshire	8	134980000	135100000	0.0214374	0.0969721	135020000	135040000	0.989798
Higher LBS in Berkshire	8	134980000	135100000	0.0214374	0.0969721	135040000	135060000	0.98469
Higher LBS in Berkshire	8	134980000	135100000	0.0214374	0.0969721	135060000	135080000	0.986183
Higher LBS in Berkshire	8	134980000	135100000	0.0214374	0.0969721	135080000	135100000	0.99209
Higher LBS in Berkshire	8	134980000	135100000	0.0214374	0.0969721	135000000	135020000	0.988759
Higher LBS in Berkshire	8	135900000	135960000	0.0398838	0.137341	135900000	135920000	0.993353
Higher LBS in Berkshire	8	135900000	135960000	0.0398838	0.137341	135940000	135960000	0.982593
Higher LBS in Berkshire	8	135900000	135960000	0.0398838	0.137341	135920000	135940000	0.990283
Higher LBS in Berkshire	8	137580000	137660000	0.0167106	0.0723374	137580000	137600000	0.990941
Higher LBS in Berkshire	8	137580000	137660000	0.0167106	0.0723374	137600000	137620000	0.996839
Higher LBS in Berkshire	8	137580000	137660000	0.0167106	0.0723374	137640000	137660000	0.996922
Higher LBS in Berkshire	8	137580000	137660000	0.0167106	0.0723374	137620000	137640000	0.997622
Higher LBS in Berkshire	9	1240000	1320000	0.0336687	0.106501	1240000	1260000	0.988194
Higher LBS in Berkshire	9	1240000	1320000	0.0336687	0.106501	1260000	1280000	0.987908
Higher LBS in Berkshire	9	1240000	1320000	0.0336687	0.106501	1280000	1300000	0.981314
Higher LBS in Berkshire	9	1240000	1320000	0.0336687	0.106501	1300000	1320000	0.976894
Higher LBS in Berkshire	9	3700000	4260000	0.00364233	0.371049	3700000	3720000	0.999313
Higher LBS in Berkshire	9	3700000	4260000	0.00364233	0.371049	3720000	3740000	0.99935
Higher LBS in Berkshire	9	3700000	4260000	0.00364233	0.371049	3740000	3760000	0.994587
Higher LBS in Berkshire	9	3700000	4260000	0.00364233	0.371049	3760000	3780000	0.992533
Higher LBS in Berkshire	9	3700000	4260000	0.00364233	0.371049	3780000	3800000	0.998526
Higher LBS in Berkshire	9	3700000	4260000	0.00364233	0.371049	3820000	3840000	0.999175
Higher LBS in Berkshire	9	3700000	4260000	0.00364233	0.371049	3840000	3860000	0.999138
Higher LBS in Berkshire	9	3700000	4260000	0.00364233	0.371049	3860000	3880000	0.998225
Higher LBS in Berkshire	9	3700000	4260000	0.00364233	0.371049	3880000	3900000	0.999219
Higher LBS in Berkshire	9	3700000	4260000	0.00364233	0.371049	3900000	3920000	0.998675
Higher LBS in Berkshire	9	3700000	4260000	0.00364233	0.371049	3940000	3960000	0.999912
Higher LBS in Berkshire	9	3700000	4260000	0.00364233	0.371049	3960000	3980000	0.999919
Higher LBS in Berkshire	9	3700000	4260000	0.00364233	0.371049	3980000	4000000	0.999762
Higher LBS in Berkshire	9	3700000	4260000	0.00364233	0.371049	4000000	4020000	0.999962
Higher LBS in Berkshire	9	3700000	4260000	0.00364233	0.371049	4020000	4040000	0.9989
Higher LBS in Berkshire	9	3700000	4260000	0.00364233	0.371049	4040000	4060000	0.998413
Higher LBS in Berkshire	9	3700000	4260000	0.00364233	0.371049	4080000	4100000	0.987932
Higher LBS in Berkshire	9	3700000	4260000	0.00364233	0.371049	4100000	4120000	0.98712
Higher LBS in Berkshire	9	3700000	4260000	0.00364233	0.371049	4120000	4140000	0.989434
Higher LBS in Berkshire	9	3700000	4260000	0.00364233	0.371049	4140000	4160000	0.988508
Higher LBS in Berkshire	9	3700000	4260000	0.00364233	0.371049	4160000	4180000	0.99288
Higher LBS in Berkshire	9	3700000	4260000	0.00364233	0.371049	4200000	4220000	0.978868
Higher LBS in Berkshire	9	3700000	4260000	0.00364233	0.371049	4220000	4240000	0.985803
Higher LBS in Berkshire	9	3700000	4260000	0.00364233	0.371049	4240000	4260000	0.982483
Higher LBS in Berkshire	9	3700000	4260000	0.00364233	0.371049	3800000	3820000	0.998376
Higher LBS in Berkshire	9	3700000	4260000	0.00364233	0.371049	3920000	3940000	0.999437
Higher LBS in Berkshire	9	3700000	4260000	0.00364233	0.371049	4060000	4080000	0.990074
Higher LBS in Berkshire	9	3700000	4260000	0.00364233	0.371049	4180000	4200000	0.989281
Higher LBS in Berkshire	9	5160000	5300000	0.00106579	0.096193	5160000	5180000	0.980779
Higher LBS in Berkshire	9	5160000	5300000	0.00106579	0.096193	5180000	5200000	0.975301
Higher LBS in Berkshire	9	5160000	5300000	0.00106579	0.096193	5200000	5220000	0.982392
Higher LBS in Berkshire	9	5160000	5300000	0.00106579	0.096193	5220000	5240000	0.978165
Higher LBS in Berkshire	9	5160000	5300000	0.00106579	0.096193	5260000	5280000	0.986856
Higher LBS in Berkshire	9	5160000	5300000	0.00106579	0.096193	5280000	5300000	0.985876
Higher LBS in Berkshire	9	5160000	5300000	0.00106579	0.096193	5240000	5260000	0.98271
Higher LBS in Berkshire	9	6700000	6820000	0.0110533	0.0760323	6700000	6720000	0.984946
Higher LBS in Berkshire	9	6700000	6820000	0.0110533	0.0760323	6720000	6740000	0.986385
Higher LBS in Berkshire	9	6700000	6820000	0.0110533	0.0760323	6740000	6760000	0.979063
Higher LBS in Berkshire	9	6700000	6820000	0.0110533	0.0760323	6760000	6780000	0.984552
Higher LBS in Berkshire	9	6700000	6820000	0.0110533	0.0760323	6780000	6800000	0.98737
Higher LBS in Berkshire	9	6700000	6820000	0.0110533	0.0760323	6800000	6820000	0.986505
Higher LBS in Berkshire	9	10380000	10460000	0.0340762	0.0629224	10380000	10400000	0.992214
Higher LBS in Berkshire	9	10380000	10460000	0.0340762	0.0629224	10400000	10420000	0.986234
Higher LBS in Berkshire	9	10380000	10460000	0.0340762	0.0629224	10420000	10440000	0.987482
Higher LBS in Berkshire	9	10380000	10460000	0.0340762	0.0629224	10440000	10460000	0.992013
Higher LBS in Berkshire	9	12140000	12740000	0.000313523	0.214046	12140000	12160000	0.989181
Higher LBS in Berkshire	9	12140000	12740000	0.000313523	0.214046	12160000	12180000	0.991484
Higher LBS in Berkshire	9	12140000	12740000	0.000313523	0.214046	12200000	12220000	0.990235
Higher LBS in Berkshire	9	12140000	12740000	0.000313523	0.214046	12220000	12240000	0.993236
Higher LBS in Berkshire	9	12140000	12740000	0.000313523	0.214046	12240000	12260000	0.982406
Higher LBS in Berkshire	9	12140000	12740000	0.000313523	0.214046	12260000	12280000	0.994544
Higher LBS in Berkshire	9	12140000	12740000	0.000313523	0.214046	12280000	12300000	0.986108
Higher LBS in Berkshire	9	12140000	12740000	0.000313523	0.214046	12300000	12320000	0.99032
Higher LBS in Berkshire	9	12140000	12740000	0.000313523	0.214046	12340000	12360000	0.990987
Higher LBS in Berkshire	9	12140000	12740000	0.000313523	0.214046	12360000	12380000	0.981274
Higher LBS in Berkshire	9	12140000	12740000	0.000313523	0.214046	12380000	12400000	0.983853
Higher LBS in Berkshire	9	12140000	12740000	0.000313523	0.214046	12400000	12420000	0.999256
Higher LBS in Berkshire	9	12140000	12740000	0.000313523	0.214046	12420000	12440000	0.999925
Higher LBS in Berkshire	9	12140000	12740000	0.000313523	0.214046	12460000	12480000	0.997118
Higher LBS in Berkshire	9	12140000	12740000	0.000313523	0.214046	12480000	12500000	0.990684
Higher LBS in Berkshire	9	12140000	12740000	0.000313523	0.214046	12500000	12520000	0.984879
Higher LBS in Berkshire	9	12140000	12740000	0.000313523	0.214046	12520000	12540000	0.982221
Higher LBS in Berkshire	9	12140000	12740000	0.000313523	0.214046	12540000	12560000	0.985656
Higher LBS in Berkshire	9	12140000	12740000	0.000313523	0.214046	12560000	12580000	0.986931
Higher LBS in Berkshire	9	12140000	12740000	0.000313523	0.214046	12600000	12620000	0.984736
Higher LBS in Berkshire	9	12140000	12740000	0.000313523	0.214046	12620000	12640000	0.9822
Higher LBS in Berkshire	9	12140000	12740000	0.000313523	0.214046	12640000	12660000	0.991598
Higher LBS in Berkshire	9	12140000	12740000	0.000313523	0.214046	12660000	12680000	0.985879
Higher LBS in Berkshire	9	12140000	12740000	0.000313523	0.214046	12680000	12700000	0.986219
Higher LBS in Berkshire	9	12140000	12740000	0.000313523	0.214046	12720000	12740000	0.990309
Higher LBS in Berkshire	9	12140000	12740000	0.000313523	0.214046	12180000	12200000	0.988758
Higher LBS in Berkshire	9	12140000	12740000	0.000313523	0.214046	12320000	12340000	0.992471
Higher LBS in Berkshire	9	12140000	12740000	0.000313523	0.214046	12440000	12460000	1
Higher LBS in Berkshire	9	12140000	12740000	0.000313523	0.214046	12700000	12720000	0.9914
Higher LBS in Berkshire	9	12140000	12740000	0.000313523	0.214046	12580000	12600000	0.987902
Higher LBS in Berkshire	9	12940000	13020000	0.0283716	0.0467696	12940000	12960000	0.987049
Higher LBS in Berkshire	9	12940000	13020000	0.0283716	0.0467696	12980000	13000000	0.986272
Higher LBS in Berkshire	9	12940000	13020000	0.0283716	0.0467696	13000000	13020000	0.986954
Higher LBS in Berkshire	9	12940000	13020000	0.0283716	0.0467696	12960000	12980000	0.987471
Higher LBS in Berkshire	9	25440000	25540000	0.00682731	0.0863353	25440000	25460000	0.983534
Higher LBS in Berkshire	9	25440000	25540000	0.00682731	0.0863353	25460000	25480000	0.986968
Higher LBS in Berkshire	9	25440000	25540000	0.00682731	0.0863353	25480000	25500000	0.97668
Higher LBS in Berkshire	9	25440000	25540000	0.00682731	0.0863353	25500000	25520000	0.980697
Higher LBS in Berkshire	9	25440000	25540000	0.00682731	0.0863353	25520000	25540000	0.982451
Higher LBS in Berkshire	9	26300000	26500000	0.0171575	0.106112	26300000	26320000	0.985497
Higher LBS in Berkshire	9	26300000	26500000	0.0171575	0.106112	26320000	26340000	0.98891
Higher LBS in Berkshire	9	26300000	26500000	0.0171575	0.106112	26360000	26380000	0.985476
Higher LBS in Berkshire	9	26300000	26500000	0.0171575	0.106112	26380000	26400000	0.987981
Higher LBS in Berkshire	9	26300000	26500000	0.0171575	0.106112	26400000	26420000	0.985549
Higher LBS in Berkshire	9	26300000	26500000	0.0171575	0.106112	26420000	26440000	0.989326
Higher LBS in Berkshire	9	26300000	26500000	0.0171575	0.106112	26440000	26460000	0.984812
Higher LBS in Berkshire	9	26300000	26500000	0.0171575	0.106112	26480000	26500000	0.982724
Higher LBS in Berkshire	9	26300000	26500000	0.0171575	0.106112	26340000	26360000	0.984577
Higher LBS in Berkshire	9	26300000	26500000	0.0171575	0.106112	26460000	26480000	0.980203
Higher LBS in Berkshire	9	27040000	27200000	0.00149259	0.106839	27040000	27060000	0.988543
Higher LBS in Berkshire	9	27040000	27200000	0.00149259	0.106839	27060000	27080000	0.986862
Higher LBS in Berkshire	9	27040000	27200000	0.00149259	0.106839	27080000	27100000	0.995726
Higher LBS in Berkshire	9	27040000	27200000	0.00149259	0.106839	27100000	27120000	0.984393
Higher LBS in Berkshire	9	27040000	27200000	0.00149259	0.106839	27140000	27160000	0.986054
Higher LBS in Berkshire	9	27040000	27200000	0.00149259	0.106839	27160000	27180000	0.985225
Higher LBS in Berkshire	9	27040000	27200000	0.00149259	0.106839	27180000	27200000	0.990404
Higher LBS in Berkshire	9	27040000	27200000	0.00149259	0.106839	27120000	27140000	0.990927
Higher LBS in Berkshire	9	30200000	30260000	0.0297091	0.0869594	30200000	30220000	0.996292
Higher LBS in Berkshire	9	30200000	30260000	0.0297091	0.0869594	30220000	30240000	0.997189
Higher LBS in Berkshire	9	30200000	30260000	0.0297091	0.0869594	30240000	30260000	0.994496
Higher LBS in Berkshire	9	30300000	30360000	0.0434957	0.128454	30300000	30320000	0.997425
Higher LBS in Berkshire	9	30300000	30360000	0.0434957	0.128454	30320000	30340000	0.995893
Higher LBS in Berkshire	9	30300000	30360000	0.0434957	0.128454	30340000	30360000	0.996511
Higher LBS in Berkshire	9	37920000	38020000	0.0316805	0.124664	37920000	37940000	0.993804
Higher LBS in Berkshire	9	37920000	38020000	0.0316805	0.124664	37940000	37960000	0.986311
Higher LBS in Berkshire	9	37920000	38020000	0.0316805	0.124664	37960000	37980000	0.990916
Higher LBS in Berkshire	9	37920000	38020000	0.0316805	0.124664	37980000	38000000	0.994229
Higher LBS in Berkshire	9	37920000	38020000	0.0316805	0.124664	38000000	38020000	0.992849
Higher LBS in Berkshire	9	43060000	43380000	0.0243053	0.106453	43060000	43080000	0.98985
Higher LBS in Berkshire	9	43060000	43380000	0.0243053	0.106453	43080000	43100000	0.988598
Higher LBS in Berkshire	9	43060000	43380000	0.0243053	0.106453	43100000	43120000	0.993208
Higher LBS in Berkshire	9	43060000	43380000	0.0243053	0.106453	43140000	43160000	0.993389
Higher LBS in Berkshire	9	43060000	43380000	0.0243053	0.106453	43160000	43180000	0.995428
[truncated: 4,912 more rows]

## Sheet: Sheet 3 (Brain)
Regions with differential LBS between breeds	Chromosome	Region start	Region end	P-value of LBS	ΔLBS (Berkshire – Tibetan)	Bin start	Bin end	Identity score
Higher LBS in Berkshire	1	8100000	8180000	0.00431728	0.0389228	8100000	8120000	0.985268
Higher LBS in Berkshire	1	8100000	8180000	0.00431728	0.0389228	8140000	8160000	0.989299
Higher LBS in Berkshire	1	8100000	8180000	0.00431728	0.0389228	8160000	8180000	0.99501
Higher LBS in Berkshire	1	8100000	8180000	0.00431728	0.0389228	8120000	8140000	0.986853
Higher LBS in Berkshire	1	8760000	8900000	0.00141063	0.0409346	8760000	8780000	0.980492
Higher LBS in Berkshire	1	8760000	8900000	0.00141063	0.0409346	8800000	8820000	0.981826
Higher LBS in Berkshire	1	8760000	8900000	0.00141063	0.0409346	8820000	8840000	0.986457
Higher LBS in Berkshire	1	8760000	8900000	0.00141063	0.0409346	8840000	8860000	0.980137
Higher LBS in Berkshire	1	8760000	8900000	0.00141063	0.0409346	8860000	8880000	0.984883
Higher LBS in Berkshire	1	8760000	8900000	0.00141063	0.0409346	8880000	8900000	0.984939
Higher LBS in Berkshire	1	8760000	8900000	0.00141063	0.0409346	8780000	8800000	0.987529
Higher LBS in Berkshire	1	15660000	15740000	0.0300749	0.026169	15660000	15680000	0.984998
Higher LBS in Berkshire	1	15660000	15740000	0.0300749	0.026169	15680000	15700000	0.985088
Higher LBS in Berkshire	1	15660000	15740000	0.0300749	0.026169	15700000	15720000	0.982889
Higher LBS in Berkshire	1	15660000	15740000	0.0300749	0.026169	15720000	15740000	0.983376
Higher LBS in Berkshire	1	17520000	17680000	0.00785386	0.0493813	17520000	17540000	0.986879
Higher LBS in Berkshire	1	17520000	17680000	0.00785386	0.0493813	17540000	17560000	0.986038
Higher LBS in Berkshire	1	17520000	17680000	0.00785386	0.0493813	17580000	17600000	0.982649
Higher LBS in Berkshire	1	17520000	17680000	0.00785386	0.0493813	17600000	17620000	0.983279
Higher LBS in Berkshire	1	17520000	17680000	0.00785386	0.0493813	17620000	17640000	0.988058
Higher LBS in Berkshire	1	17520000	17680000	0.00785386	0.0493813	17640000	17660000	0.985051
Higher LBS in Berkshire	1	17520000	17680000	0.00785386	0.0493813	17660000	17680000	0.982815
Higher LBS in Berkshire	1	17520000	17680000	0.00785386	0.0493813	17560000	17580000	0.978655
Higher LBS in Berkshire	1	23400000	23580000	0.0057595	0.0472788	23400000	23420000	0.996507
Higher LBS in Berkshire	1	23400000	23580000	0.0057595	0.0472788	23420000	23440000	0.994449
Higher LBS in Berkshire	1	23400000	23580000	0.0057595	0.0472788	23440000	23460000	0.990119
Higher LBS in Berkshire	1	23400000	23580000	0.0057595	0.0472788	23480000	23500000	0.995317
Higher LBS in Berkshire	1	23400000	23580000	0.0057595	0.0472788	23500000	23520000	0.994622
Higher LBS in Berkshire	1	23400000	23580000	0.0057595	0.0472788	23520000	23540000	0.993502
Higher LBS in Berkshire	1	23400000	23580000	0.0057595	0.0472788	23540000	23560000	0.993239
Higher LBS in Berkshire	1	23400000	23580000	0.0057595	0.0472788	23560000	23580000	0.992939
Higher LBS in Berkshire	1	23400000	23580000	0.0057595	0.0472788	23460000	23480000	0.991333
Higher LBS in Berkshire	1	27500000	27560000	0.0420188	0.0274544	27500000	27520000	0.984263
Higher LBS in Berkshire	1	27500000	27560000	0.0420188	0.0274544	27540000	27560000	0.990806
Higher LBS in Berkshire	1	27500000	27560000	0.0420188	0.0274544	27520000	27540000	0.994804
Higher LBS in Berkshire	1	30200000	30280000	0.00899576	0.0442201	30200000	30220000	0.990177
Higher LBS in Berkshire	1	30200000	30280000	0.00899576	0.0442201	30220000	30240000	0.989137
Higher LBS in Berkshire	1	30200000	30280000	0.00899576	0.0442201	30240000	30260000	0.992221
Higher LBS in Berkshire	1	30200000	30280000	0.00899576	0.0442201	30260000	30280000	0.993507
Higher LBS in Berkshire	1	33240000	33300000	0.0330371	0.0325032	33240000	33260000	0.989321
Higher LBS in Berkshire	1	33240000	33300000	0.0330371	0.0325032	33260000	33280000	0.99389
Higher LBS in Berkshire	1	33240000	33300000	0.0330371	0.0325032	33280000	33300000	0.994682
Higher LBS in Berkshire	1	34740000	34800000	0.00474326	0.0343983	34740000	34760000	0.98977
Higher LBS in Berkshire	1	34740000	34800000	0.00474326	0.0343983	34760000	34780000	0.992386
Higher LBS in Berkshire	1	34740000	34800000	0.00474326	0.0343983	34780000	34800000	0.989065
Higher LBS in Berkshire	1	39400000	39500000	0.0221592	0.0400475	39400000	39420000	0.992262
Higher LBS in Berkshire	1	39400000	39500000	0.0221592	0.0400475	39420000	39440000	0.990218
Higher LBS in Berkshire	1	39400000	39500000	0.0221592	0.0400475	39460000	39480000	0.991791
Higher LBS in Berkshire	1	39400000	39500000	0.0221592	0.0400475	39480000	39500000	0.993711
Higher LBS in Berkshire	1	39400000	39500000	0.0221592	0.0400475	39440000	39460000	0.987834
Higher LBS in Berkshire	1	41340000	41420000	0.0210566	0.0488073	41340000	41360000	0.996302
Higher LBS in Berkshire	1	41340000	41420000	0.0210566	0.0488073	41360000	41380000	0.996202
Higher LBS in Berkshire	1	41340000	41420000	0.0210566	0.0488073	41380000	41400000	0.997152
Higher LBS in Berkshire	1	41340000	41420000	0.0210566	0.0488073	41400000	41420000	0.995784
Higher LBS in Berkshire	1	51920000	52000000	0.0181693	0.0471899	51920000	51940000	0.99517
Higher LBS in Berkshire	1	51920000	52000000	0.0181693	0.0471899	51940000	51960000	0.990241
Higher LBS in Berkshire	1	51920000	52000000	0.0181693	0.0471899	51960000	51980000	0.992224
Higher LBS in Berkshire	1	51920000	52000000	0.0181693	0.0471899	51980000	52000000	0.993077
Higher LBS in Berkshire	1	52520000	52620000	0.0222207	0.0303623	52520000	52540000	0.996252
Higher LBS in Berkshire	1	52520000	52620000	0.0222207	0.0303623	52560000	52580000	0.992891
Higher LBS in Berkshire	1	52520000	52620000	0.0222207	0.0303623	52580000	52600000	0.994016
Higher LBS in Berkshire	1	52520000	52620000	0.0222207	0.0303623	52600000	52620000	0.99303
Higher LBS in Berkshire	1	52520000	52620000	0.0222207	0.0303623	52540000	52560000	0.996576
Higher LBS in Berkshire	1	52740000	53000000	0.000298321	0.0490903	52740000	52760000	0.994129
Higher LBS in Berkshire	1	52740000	53000000	0.000298321	0.0490903	52760000	52780000	0.990592
Higher LBS in Berkshire	1	52740000	53000000	0.000298321	0.0490903	52780000	52800000	0.995629
Higher LBS in Berkshire	1	52740000	53000000	0.000298321	0.0490903	52800000	52820000	0.996769
Higher LBS in Berkshire	1	52740000	53000000	0.000298321	0.0490903	52840000	52860000	0.996433
Higher LBS in Berkshire	1	52740000	53000000	0.000298321	0.0490903	52860000	52880000	0.995492
Higher LBS in Berkshire	1	52740000	53000000	0.000298321	0.0490903	52880000	52900000	0.996564
Higher LBS in Berkshire	1	52740000	53000000	0.000298321	0.0490903	52900000	52920000	0.991736
Higher LBS in Berkshire	1	52740000	53000000	0.000298321	0.0490903	52920000	52940000	0.996129
Higher LBS in Berkshire	1	52740000	53000000	0.000298321	0.0490903	52960000	52980000	0.992427
Higher LBS in Berkshire	1	52740000	53000000	0.000298321	0.0490903	52980000	53000000	0.993358
Higher LBS in Berkshire	1	52740000	53000000	0.000298321	0.0490903	52820000	52840000	0.994631
Higher LBS in Berkshire	1	52740000	53000000	0.000298321	0.0490903	52940000	52960000	0.991595
Higher LBS in Berkshire	1	54640000	54740000	0.00813089	0.0656886	54660000	54680000	0.985839
Higher LBS in Berkshire	1	54640000	54740000	0.00813089	0.0656886	54680000	54700000	0.996752
Higher LBS in Berkshire	1	54640000	54740000	0.00813089	0.0656886	54700000	54720000	0.998033
Higher LBS in Berkshire	1	54640000	54740000	0.00813089	0.0656886	54720000	54740000	0.996504
Higher LBS in Berkshire	1	54640000	54740000	0.00813089	0.0656886	54640000	54660000	0.99428
Higher LBS in Berkshire	1	56420000	56520000	0.0310105	0.0465935	56420000	56440000	0.99556
Higher LBS in Berkshire	1	56420000	56520000	0.0310105	0.0465935	56440000	56460000	0.992869
Higher LBS in Berkshire	1	56420000	56520000	0.0310105	0.0465935	56460000	56480000	0.990835
Higher LBS in Berkshire	1	56420000	56520000	0.0310105	0.0465935	56500000	56520000	0.987883
Higher LBS in Berkshire	1	56420000	56520000	0.0310105	0.0465935	56480000	56500000	0.995551
Higher LBS in Berkshire	1	56800000	56960000	0.00242125	0.0511087	56800000	56820000	0.99025
Higher LBS in Berkshire	1	56800000	56960000	0.00242125	0.0511087	56820000	56840000	0.989719
Higher LBS in Berkshire	1	56800000	56960000	0.00242125	0.0511087	56840000	56860000	0.996573
Higher LBS in Berkshire	1	56800000	56960000	0.00242125	0.0511087	56860000	56880000	0.995226
Higher LBS in Berkshire	1	56800000	56960000	0.00242125	0.0511087	56900000	56920000	0.996196
Higher LBS in Berkshire	1	56800000	56960000	0.00242125	0.0511087	56920000	56940000	0.9963
Higher LBS in Berkshire	1	56800000	56960000	0.00242125	0.0511087	56940000	56960000	0.998282
Higher LBS in Berkshire	1	56800000	56960000	0.00242125	0.0511087	56880000	56900000	0.994231
Higher LBS in Berkshire	1	58120000	58240000	0.00661141	0.0239372	58120000	58140000	0.992878
Higher LBS in Berkshire	1	58120000	58240000	0.00661141	0.0239372	58140000	58160000	0.994356
Higher LBS in Berkshire	1	58120000	58240000	0.00661141	0.0239372	58160000	58180000	0.995919
Higher LBS in Berkshire	1	58120000	58240000	0.00661141	0.0239372	58200000	58220000	0.993722
Higher LBS in Berkshire	1	58120000	58240000	0.00661141	0.0239372	58220000	58240000	0.990334
Higher LBS in Berkshire	1	58120000	58240000	0.00661141	0.0239372	58180000	58200000	0.994033
Higher LBS in Berkshire	1	68760000	68840000	0.0181915	0.0412675	68760000	68780000	0.998369
Higher LBS in Berkshire	1	68760000	68840000	0.0181915	0.0412675	68780000	68800000	0.997751
Higher LBS in Berkshire	1	68760000	68840000	0.0181915	0.0412675	68820000	68840000	0.997531
Higher LBS in Berkshire	1	68760000	68840000	0.0181915	0.0412675	68800000	68820000	0.996978
Higher LBS in Berkshire	1	69060000	69220000	0.00988914	0.038985	69080000	69100000	0.995518
Higher LBS in Berkshire	1	69060000	69220000	0.00988914	0.038985	69100000	69120000	0.993616
Higher LBS in Berkshire	1	69060000	69220000	0.00988914	0.038985	69120000	69140000	0.996539
Higher LBS in Berkshire	1	69060000	69220000	0.00988914	0.038985	69140000	69160000	0.993461
Higher LBS in Berkshire	1	69060000	69220000	0.00988914	0.038985	69160000	69180000	0.990785
Higher LBS in Berkshire	1	69060000	69220000	0.00988914	0.038985	69180000	69200000	0.992981
Higher LBS in Berkshire	1	69060000	69220000	0.00988914	0.038985	69060000	69080000	0.995276
Higher LBS in Berkshire	1	69060000	69220000	0.00988914	0.038985	69200000	69220000	0.989296
Higher LBS in Berkshire	1	69560000	69660000	0.0155455	0.0315032	69560000	69580000	0.997051
Higher LBS in Berkshire	1	69560000	69660000	0.0155455	0.0315032	69600000	69620000	0.996451
Higher LBS in Berkshire	1	69560000	69660000	0.0155455	0.0315032	69620000	69640000	0.994377
Higher LBS in Berkshire	1	69560000	69660000	0.0155455	0.0315032	69640000	69660000	0.993049
Higher LBS in Berkshire	1	69560000	69660000	0.0155455	0.0315032	69580000	69600000	0.9972
Higher LBS in Berkshire	1	70100000	70240000	0.000161563	0.0578582	70100000	70120000	0.998219
Higher LBS in Berkshire	1	70100000	70240000	0.000161563	0.0578582	70140000	70160000	0.995778
Higher LBS in Berkshire	1	70100000	70240000	0.000161563	0.0578582	70160000	70180000	0.992284
Higher LBS in Berkshire	1	70100000	70240000	0.000161563	0.0578582	70180000	70200000	0.991779
Higher LBS in Berkshire	1	70100000	70240000	0.000161563	0.0578582	70200000	70220000	0.993115
Higher LBS in Berkshire	1	70100000	70240000	0.000161563	0.0578582	70220000	70240000	0.983085
Higher LBS in Berkshire	1	70100000	70240000	0.000161563	0.0578582	70120000	70140000	0.996101
Higher LBS in Berkshire	1	70520000	70580000	0.0392118	0.0513761	70520000	70540000	0.995535
Higher LBS in Berkshire	1	70520000	70580000	0.0392118	0.0513761	70540000	70560000	0.994323
Higher LBS in Berkshire	1	70520000	70580000	0.0392118	0.0513761	70560000	70580000	0.996914
Higher LBS in Berkshire	1	73120000	73180000	0.0184512	0.0402254	73140000	73160000	0.996657
Higher LBS in Berkshire	1	73120000	73180000	0.0184512	0.0402254	73160000	73180000	0.995499
Higher LBS in Berkshire	1	73120000	73180000	0.0184512	0.0402254	73120000	73140000	0.993358
Higher LBS in Berkshire	1	75280000	75360000	0.0210484	0.0370442	75280000	75300000	0.993883
Higher LBS in Berkshire	1	75280000	75360000	0.0210484	0.0370442	75300000	75320000	0.990801
Higher LBS in Berkshire	1	75280000	75360000	0.0210484	0.0370442	75320000	75340000	0.993619
Higher LBS in Berkshire	1	75280000	75360000	0.0210484	0.0370442	75340000	75360000	0.992425
Higher LBS in Berkshire	1	76120000	76260000	0.00594715	0.297529	76120000	76140000	0.999731
Higher LBS in Berkshire	1	76120000	76260000	0.00594715	0.297529	76160000	76180000	0.998688
Higher LBS in Berkshire	1	76120000	76260000	0.00594715	0.297529	76180000	76200000	0.998057
Higher LBS in Berkshire	1	76120000	76260000	0.00594715	0.297529	76200000	76220000	0.997984
Higher LBS in Berkshire	1	76120000	76260000	0.00594715	0.297529	76220000	76240000	0.996691
Higher LBS in Berkshire	1	76120000	76260000	0.00594715	0.297529	76240000	76260000	0.998257
Higher LBS in Berkshire	1	76120000	76260000	0.00594715	0.297529	76140000	76160000	0.9999
Higher LBS in Berkshire	1	76400000	76520000	0.0041935	0.109239	76420000	76440000	0.987584
Higher LBS in Berkshire	1	76400000	76520000	0.0041935	0.109239	76440000	76460000	0.990767
Higher LBS in Berkshire	1	76400000	76520000	0.0041935	0.109239	76460000	76480000	0.995163
Higher LBS in Berkshire	1	76400000	76520000	0.0041935	0.109239	76480000	76500000	0.997259
Higher LBS in Berkshire	1	76400000	76520000	0.0041935	0.109239	76500000	76520000	0.997639
Higher LBS in Berkshire	1	76400000	76520000	0.0041935	0.109239	76400000	76420000	0.990845
Higher LBS in Berkshire	1	76800000	76860000	0.00678129	0.0222882	76820000	76840000	0.996429
Higher LBS in Berkshire	1	76800000	76860000	0.00678129	0.0222882	76840000	76860000	0.996642
Higher LBS in Berkshire	1	76800000	76860000	0.00678129	0.0222882	76800000	76820000	0.996256
Higher LBS in Berkshire	1	77020000	77080000	0.034795	0.0348683	77020000	77040000	0.994538
Higher LBS in Berkshire	1	77020000	77080000	0.034795	0.0348683	77040000	77060000	0.99159
Higher LBS in Berkshire	1	77020000	77080000	0.034795	0.0348683	77060000	77080000	0.987809
Higher LBS in Berkshire	1	86200000	86340000	0.0158855	0.0927208	86200000	86220000	0.991541
Higher LBS in Berkshire	1	86200000	86340000	0.0158855	0.0927208	86220000	86240000	0.991811
Higher LBS in Berkshire	1	86200000	86340000	0.0158855	0.0927208	86260000	86280000	0.991385
Higher LBS in Berkshire	1	86200000	86340000	0.0158855	0.0927208	86280000	86300000	0.985689
Higher LBS in Berkshire	1	86200000	86340000	0.0158855	0.0927208	86300000	86320000	0.987464
Higher LBS in Berkshire	1	86200000	86340000	0.0158855	0.0927208	86320000	86340000	0.99634
Higher LBS in Berkshire	1	86200000	86340000	0.0158855	0.0927208	86240000	86260000	0.994148
Higher LBS in Berkshire	1	99160000	99300000	0.00809935	0.0536569	99160000	99180000	0.99197
Higher LBS in Berkshire	1	99160000	99300000	0.00809935	0.0536569	99180000	99200000	0.995331
Higher LBS in Berkshire	1	99160000	99300000	0.00809935	0.0536569	99200000	99220000	0.997271
Higher LBS in Berkshire	1	99160000	99300000	0.00809935	0.0536569	99240000	99260000	0.993394
Higher LBS in Berkshire	1	99160000	99300000	0.00809935	0.0536569	99260000	99280000	0.996692
Higher LBS in Berkshire	1	99160000	99300000	0.00809935	0.0536569	99280000	99300000	0.998845
Higher LBS in Berkshire	1	99160000	99300000	0.00809935	0.0536569	99220000	99240000	0.992275
Higher LBS in Berkshire	1	100540000	100740000	6.14582e-05	0.086424	100540000	100560000	0.985157
Higher LBS in Berkshire	1	100540000	100740000	6.14582e-05	0.086424	100560000	100580000	0.996056
Higher LBS in Berkshire	1	100540000	100740000	6.14582e-05	0.086424	100580000	100600000	0.997676
Higher LBS in Berkshire	1	100540000	100740000	6.14582e-05	0.086424	100600000	100620000	0.99578
Higher LBS in Berkshire	1	100540000	100740000	6.14582e-05	0.086424	100620000	100640000	0.995726
Higher LBS in Berkshire	1	100540000	100740000	6.14582e-05	0.086424	100640000	100660000	0.99689
Higher LBS in Berkshire	1	100540000	100740000	6.14582e-05	0.086424	100680000	100700000	0.997514
Higher LBS in Berkshire	1	100540000	100740000	6.14582e-05	0.086424	100700000	100720000	0.993458
Higher LBS in Berkshire	1	100540000	100740000	6.14582e-05	0.086424	100720000	100740000	0.995515
Higher LBS in Berkshire	1	100540000	100740000	6.14582e-05	0.086424	100660000	100680000	0.9973
Higher LBS in Berkshire	1	109860000	110000000	0.0224977	0.0389262	109860000	109880000	0.993166
Higher LBS in Berkshire	1	109860000	110000000	0.0224977	0.0389262	109880000	109900000	0.984423
Higher LBS in Berkshire	1	109860000	110000000	0.0224977	0.0389262	109900000	109920000	0.986261
Higher LBS in Berkshire	1	109860000	110000000	0.0224977	0.0389262	109920000	109940000	0.991569
Higher LBS in Berkshire	1	109860000	110000000	0.0224977	0.0389262	109940000	109960000	0.998232
Higher LBS in Berkshire	1	109860000	110000000	0.0224977	0.0389262	109980000	110000000	0.99417
Higher LBS in Berkshire	1	109860000	110000000	0.0224977	0.0389262	109960000	109980000	0.99805
Higher LBS in Berkshire	1	110800000	110900000	0.0301174	0.0290416	110800000	110820000	0.98806
Higher LBS in Berkshire	1	110800000	110900000	0.0301174	0.0290416	110820000	110840000	0.996046
Higher LBS in Berkshire	1	110800000	110900000	0.0301174	0.0290416	110840000	110860000	0.995827
Higher LBS in Berkshire	1	110800000	110900000	0.0301174	0.0290416	110860000	110880000	0.994731
Higher LBS in Berkshire	1	110800000	110900000	0.0301174	0.0290416	110880000	110900000	0.993805
Higher LBS in Berkshire	1	112260000	112340000	0.0145682	0.0304958	112260000	112280000	0.991678
Higher LBS in Berkshire	1	112260000	112340000	0.0145682	0.0304958	112280000	112300000	0.990954
Higher LBS in Berkshire	1	112260000	112340000	0.0145682	0.0304958	112300000	112320000	0.997851
Higher LBS in Berkshire	1	112260000	112340000	0.0145682	0.0304958	112320000	112340000	0.998525
Higher LBS in Berkshire	1	114180000	114380000	0.00425734	0.0536945	114180000	114200000	0.99644
Higher LBS in Berkshire	1	114180000	114380000	0.00425734	0.0536945	114200000	114220000	0.993891
Higher LBS in Berkshire	1	114180000	114380000	0.00425734	0.0536945	114220000	114240000	0.997433
Higher LBS in Berkshire	1	114180000	114380000	0.00425734	0.0536945	114240000	114260000	0.995052
Higher LBS in Berkshire	1	114180000	114380000	0.00425734	0.0536945	114260000	114280000	0.99549
Higher LBS in Berkshire	1	114180000	114380000	0.00425734	0.0536945	114300000	114320000	0.993301
Higher LBS in Berkshire	1	114180000	114380000	0.00425734	0.0536945	114320000	114340000	0.994912
Higher LBS in Berkshire	1	114180000	114380000	0.00425734	0.0536945	114340000	114360000	0.989053
Higher LBS in Berkshire	1	114180000	114380000	0.00425734	0.0536945	114360000	114380000	0.997863
Higher LBS in Berkshire	1	114180000	114380000	0.00425734	0.0536945	114280000	114300000	0.992458
Higher LBS in Berkshire	1	117380000	117600000	0.020024	0.0504112	117380000	117400000	0.991555
Higher LBS in Berkshire	1	117380000	117600000	0.020024	0.0504112	117400000	117420000	0.995535
Higher LBS in Berkshire	1	117380000	117600000	0.020024	0.0504112	117420000	117440000	0.993681
Higher LBS in Berkshire	1	117380000	117600000	0.020024	0.0504112	117460000	117480000	0.987705
Higher LBS in Berkshire	1	117380000	117600000	0.020024	0.0504112	117480000	117500000	0.990991
Higher LBS in Berkshire	1	117380000	117600000	0.020024	0.0504112	117500000	117520000	0.990042
Higher LBS in Berkshire	1	117380000	117600000	0.020024	0.0504112	117520000	117540000	0.996404
Higher LBS in Berkshire	1	117380000	117600000	0.020024	0.0504112	117540000	117560000	0.994573
Higher LBS in Berkshire	1	117380000	117600000	0.020024	0.0504112	117580000	117600000	0.993512
Higher LBS in Berkshire	1	117380000	117600000	0.020024	0.0504112	117560000	117580000	0.986435
Higher LBS in Berkshire	1	117380000	117600000	0.020024	0.0504112	117440000	117460000	0.995788
Higher LBS in Berkshire	1	120620000	120980000	0.00790813	0.0873955	120620000	120640000	0.993956
Higher LBS in Berkshire	1	120620000	120980000	0.00790813	0.0873955	120640000	120660000	0.996457
Higher LBS in Berkshire	1	120620000	120980000	0.00790813	0.0873955	120660000	120680000	0.997163
Higher LBS in Berkshire	1	120620000	120980000	0.00790813	0.0873955	120680000	120700000	0.995865
Higher LBS in Berkshire	1	120620000	120980000	0.00790813	0.0873955	120720000	120740000	0.997819
Higher LBS in Berkshire	1	120620000	120980000	0.00790813	0.0873955	120740000	120760000	0.997232
Higher LBS in Berkshire	1	120620000	120980000	0.00790813	0.0873955	120760000	120780000	0.993658
Higher LBS in Berkshire	1	120620000	120980000	0.00790813	0.0873955	120780000	120800000	0.990222
Higher LBS in Berkshire	1	120620000	120980000	0.00790813	0.0873955	120800000	120820000	0.99218
Higher LBS in Berkshire	1	120620000	120980000	0.00790813	0.0873955	120820000	120840000	0.989674
Higher LBS in Berkshire	1	120620000	120980000	0.00790813	0.0873955	120860000	120880000	0.997364
Higher LBS in Berkshire	1	120620000	120980000	0.00790813	0.0873955	120880000	120900000	0.997064
Higher LBS in Berkshire	1	120620000	120980000	0.00790813	0.0873955	120900000	120920000	0.993724
Higher LBS in Berkshire	1	120620000	120980000	0.00790813	0.0873955	120920000	120940000	0.996461
Higher LBS in Berkshire	1	120620000	120980000	0.00790813	0.0873955	120940000	120960000	0.992781
Higher LBS in Berkshire	1	120620000	120980000	0.00790813	0.0873955	120700000	120720000	0.998681
Higher LBS in Berkshire	1	120620000	120980000	0.00790813	0.0873955	120840000	120860000	0.993063
Higher LBS in Berkshire	1	120620000	120980000	0.00790813	0.0873955	120960000	120980000	0.994942
Higher LBS in Berkshire	1	125780000	125860000	0.0286743	0.0544846	125780000	125800000	0.998257
Higher LBS in Berkshire	1	125780000	125860000	0.0286743	0.0544846	125800000	125820000	0.997302
Higher LBS in Berkshire	1	125780000	125860000	0.0286743	0.0544846	125840000	125860000	0.994211
Higher LBS in Berkshire	1	125780000	125860000	0.0286743	0.0544846	125820000	125840000	0.993981
Higher LBS in Berkshire	1	128120000	128200000	0.0232833	0.0906257	128120000	128140000	0.992921
Higher LBS in Berkshire	1	128120000	128200000	0.0232833	0.0906257	128140000	128160000	0.994576
Higher LBS in Berkshire	1	128120000	128200000	0.0232833	0.0906257	128160000	128180000	0.995195
Higher LBS in Berkshire	1	128120000	128200000	0.0232833	0.0906257	128180000	128200000	0.993808
Higher LBS in Berkshire	1	131720000	131900000	0.00613183	0.0478839	131740000	131760000	0.995019
Higher LBS in Berkshire	1	131720000	131900000	0.00613183	0.0478839	131760000	131780000	0.997766
Higher LBS in Berkshire	1	131720000	131900000	0.00613183	0.0478839	131780000	131800000	0.99694
Higher LBS in Berkshire	1	131720000	131900000	0.00613183	0.0478839	131800000	131820000	0.996966
Higher LBS in Berkshire	1	131720000	131900000	0.00613183	0.0478839	131820000	131840000	0.999363
Higher LBS in Berkshire	1	131720000	131900000	0.00613183	0.0478839	131860000	131880000	0.993224
Higher LBS in Berkshire	1	131720000	131900000	0.00613183	0.0478839	131880000	131900000	0.993578
Higher LBS in Berkshire	1	131720000	131900000	0.00613183	0.0478839	131720000	131740000	0.998226
Higher LBS in Berkshire	1	131720000	131900000	0.00613183	0.0478839	131840000	131860000	0.994045
Higher LBS in Berkshire	1	133180000	133300000	0.000632584	0.050765	133180000	133200000	0.993922
Higher LBS in Berkshire	1	133180000	133300000	0.000632584	0.050765	133200000	133220000	0.993424
Higher LBS in Berkshire	1	133180000	133300000	0.000632584	0.050765	133220000	133240000	0.993787
Higher LBS in Berkshire	1	133180000	133300000	0.000632584	0.050765	133240000	133260000	0.996238
Higher LBS in Berkshire	1	133180000	133300000	0.000632584	0.050765	133260000	133280000	0.995202
Higher LBS in Berkshire	1	133180000	133300000	0.000632584	0.050765	133280000	133300000	0.994643
Higher LBS in Berkshire	1	133700000	133820000	0.00712028	0.0440832	133700000	133720000	0.997689
Higher LBS in Berkshire	1	133700000	133820000	0.00712028	0.0440832	133720000	133740000	0.995732
Higher LBS in Berkshire	1	133700000	133820000	0.00712028	0.0440832	133740000	133760000	0.997738
Higher LBS in Berkshire	1	133700000	133820000	0.00712028	0.0440832	133760000	133780000	0.997167
Higher LBS in Berkshire	1	133700000	133820000	0.00712028	0.0440832	133780000	133800000	0.997777
Higher LBS in Berkshire	1	133700000	133820000	0.00712028	0.0440832	133800000	133820000	0.9984
Higher LBS in Berkshire	1	136180000	136240000	0.00993213	0.0382388	136200000	136220000	0.997507
Higher LBS in Berkshire	1	136180000	136240000	0.00993213	0.0382388	136220000	136240000	0.996603
Higher LBS in Berkshire	1	136180000	136240000	0.00993213	0.0382388	136180000	136200000	0.996515
Higher LBS in Berkshire	1	144240000	144300000	0.0267173	0.0488492	144240000	144260000	0.994905
[truncated: 7,634 more rows]

## Sheet: ReadMe
Supplementary Table 6. Basic characteristics of genomic regions with differential LBS values between breeds in the three tissues.
[truncated: 3 more rows]
