# Supplementary material for: Haplotype-resolved 3D chromatin architecture of the hybrid pig
Source: HighWire-hosted journal article supplement (doi:10.1101/gr.278101.123), 2024-02-01
Supplement: Supplemental_Table_S7.xlsx [file Supplemental_Table_S7.xlsx]

## Sheet: Sheet 1 (Summary)
Comparison	Genes with differential RPS between tissues	Gene number	% of the genome (autosomes only)	Mean RPS in the former tissue	Mean RPS in the latter tissue	ΔRPS (former – latter)	Mean enhancer number per gene in the former tissue	Mean enhancer number per gene in the latter tissue	Median TPM in former tissue	Median TPM in latter tissue	Median value of log2FC of expression (former / latter)
Liver vs. muscle	Higher RPS in the liver	2422	12.53	12.59	5.36	7.23	9.66	4.08	13.97	7.3	0.49
	Higher RPS in the muscle	2288	11.84	5.61	13.45	-7.84	4.27	9.72	10.54	20.85	-0.62
Liver vs. brain	Higher RPS in the liver	2511	12.99	13.49	6.18	7.31	10.48	4.35	12.01	6.41	0.54
	Higher RPS in the brain	2595	13.43	3.91	10.79	-6.89	2.9	7.27	9.69	19.99	-0.66
Muscle vs. brain	Higher RPS in the muscle	2273	11.76	14.78	6.93	7.85	10.92	4.82	17.25	9.06	0.53
	Higher RPS in the brain	2507	12.97	3.89	10.77	-6.88	2.83	7.28	9.43	18.76	-0.49

## Sheet: Sheet 2 (liver vs. muscle)
Genes with differential RPS between liver and muscle	Chromosome	TSS position	GeneID	Symbol	Mean RPS in liver	Mean RPS in muscle	P-value of RPS	ΔRPS (liver – muscle)	Enhancer number of gene in liver				Enhancer number of gene in muscle				Promoter type in liver	Promoter type in muscle	Mean TPM in liver	Mean TPM in muscle	log2FC of expression (liver / muscle)	P-value of expression
									All	High activity	Moderate activity	Low activity	All	High activity	Moderate activity	Low activity
higher RPS in liver	1	186749	ENSSSCG00000029697	FAM120B	31.1567	6.35058	1.12161e-09	24.8038	23	6	4	13	5	0	0	5	Active	Active	29.54	55.89	-0.870867	3.61789e-07
higher RPS in liver	1	199231	ENSSSCG00000027726	DLL1	46.4183	29.7206	7.31095e-07	16.7	33	12	7	14	21	0	0	21	Active	Active	3.56	4.05	-0.0888289	0.718644
higher RPS in liver	1	482720	ENSSSCG00000047845	Unknown	24.7387	0.800144	3.14265e-07	23.9375	23	0	4	19	1	0	0	1	Inactive	Inactive	0.43	0.58	-0.0902506	0.850859
higher RPS in liver	1	540898	ENSSSCG00000004010	ERMARD	12.9485	0	2.83272e-10	12.945	10	0	1	9	0	0	0	0	Active	Active	23.5	26.1	-0.0639938	0.710446
higher RPS in liver	1	541028	ENSSSCG00000004009	TCTE3	12.9485	0	2.83272e-10	12.945	10	0	1	9	0	0	0	0	Active	Active	2.49	0.95	1.67324	0.0163226
higher RPS in liver	1	1698776	ENSSSCG00000004018	AFDN	16.0547	2.20073	4.94793e-06	13.8525	12	0	1	11	2	0	0	2	Active	Active	56.16	22.52	1.30847	2.86591e-07
higher RPS in liver	1	2120778	ENSSSCG00000004023	CEP43	23.8041	18.9098	1.02517e-06	4.89375	16	0	5	11	12	0	0	12	Active	Active	13.45	12.15	0.179495	0.260748
higher RPS in liver	1	3120223	ENSSSCG00000004027	PDE10A	9.96203	1.15294	2.76661e-08	8.81	8	3	4	1	1	0	1	0	Active	Active	10.12	6.49	0.751007	0.024689
higher RPS in liver	1	7590032	ENSSSCG00000004047	MRPL18	14.135	10.7271	0.00863531	3.40875	11	0	4	7	8	0	3	5	Active	Active	91.53	92.56	-0.0500066	0.878114
higher RPS in liver	1	8208084	ENSSSCG00000004053	TAGAP	8.52817	2.89257	1.26757e-07	5.635	6	0	0	6	2	0	0	2	Inactive	Inactive	3.77	2.26	0.872874	4.63345e-07
higher RPS in liver	1	9619727	ENSSSCG00000035027	ZDHHC14	16.84	0	4.80263e-11	16.835	13	1	3	9	0	0	0	0	Active	Active	14.08	2.2	2.76866	2.50575e-62
higher RPS in liver	1	9620679	ENSSSCG00000038527	Unknown	27.6007	2.59161	3.7558e-11	25.01	21	0	6	15	2	2	0	0	Active	Active	1.85	0.95	1.03331	0.000240568
higher RPS in liver	1	9667291	ENSSSCG00000004063	TMEM242	44.332	21.6562	4.50215e-09	22.675	31	1	7	23	15	12	1	2	Active	Active	73.4	40.17	0.875942	0.000112607
higher RPS in liver	1	12122348	ENSSSCG00000004070	SCAF8	11.7332	6.45804	2.76951e-08	5.27625	8	0	4	4	4	0	0	4	Active	Active	46.62	66.78	-0.403964	9.54032e-05
higher RPS in liver	1	13715171	ENSSSCG00000004081	SYNE1	16.5669	0	1.38065e-10	16.5625	14	0	1	13	0	0	0	0	Active	Active	10.47	9.38	0.526455	0.122553
higher RPS in liver	1	15329966	ENSSSCG00000004092	MTHFD1L	8.7664	1.22917	6.10882e-10	7.53625	7	0	0	7	1	0	1	0	Active	Active	6.36	10.01	-0.448337	0.0933467
higher RPS in liver	1	15587591	ENSSSCG00000032778	PLEKHG1	7.46496	2.7413	1.91269e-06	4.72375	6	0	5	1	2	0	2	0	Active	Active	9.97	9.21	0.195242	0.285503
higher RPS in liver	1	15730101	ENSSSCG00000040966	TMED2	35.4633	10.3034	9.8907e-10	25.1612	27	0	11	16	7	0	2	5	Inactive	Inactive	0	0.5	-	-
higher RPS in liver	1	16043121	ENSSSCG00000033578	AL355312.5	11.3902	8.20946	7.24614e-05	3.17875	9	0	0	9	6	0	3	3	Active	Active	0.52	1.32	-1.14809	9.12759e-05
higher RPS in liver	1	16059722	ENSSSCG00000004096	AL355312.5	13.5992	10.1569	6.83568e-07	3.44375	9	0	2	7	7	0	4	3	Inactive	Inactive	0.07	0.23	-	-
higher RPS in liver	1	18290022	ENSSSCG00000048240	SAMD5	33.2383	21.7642	5.09945e-09	11.4738	24	0	1	23	15	0	6	9	Active	Active	11.63	4.41	1.67747	1.43145e-12
higher RPS in liver	1	19097892	ENSSSCG00000004114	RAB32	24.6303	10.8373	6.71665e-08	13.7912	19	0	5	14	7	0	0	7	Active	Active	97.33	24.85	1.94477	7.47457e-19
higher RPS in liver	1	22935121	ENSSSCG00000034307	GJE1	9.49269	4.33968	2.46302e-06	5.1525	7	0	2	5	3	0	0	3	Inactive	Inactive	0	0	-	-
higher RPS in liver	1	25155664	ENSSSCG00000004142	CITED2	41.6015	16.7375	6.63224e-11	24.8637	31	0	14	17	12	1	3	8	Active	Active	39.52	40.34	-0.0344063	0.89882
higher RPS in liver	1	25663275	ENSSSCG00000004148	CCDC28A	9.37617	4.29153	4.08204e-08	5.08625	7	4	1	2	3	0	2	1	Active	Active	48.99	26.88	0.827309	0.0159336
higher RPS in liver	1	25736370	ENSSSCG00000004149	NHSL1	15.757	0	1.64929e-11	15.7513	11	7	0	4	0	0	0	0	Active	Active	8.27	5.44	0.801328	0.0125311
higher RPS in liver	1	27137558	ENSSSCG00000004157	IL20RA	4.91533	1.28385	7.41855e-06	3.63125	4	0	1	3	1	0	0	1	Active	Active	2.46	0.26	3.91302	1.49665e-19
higher RPS in liver	1	27606036	ENSSSCG00000039049	MAP7	6.08817	0	1.63729e-07	6.0825	5	0	3	2	0	0	0	0	Active	Active	16.2	0.83	4.51521	1.45315e-89
higher RPS in liver	1	28857000	ENSSSCG00000004167	MYB	8.94309	0	3.20707e-09	8.9375	7	0	1	6	0	0	0	0	Active	Active	10.66	1.8	2.79024	6.75823e-16
higher RPS in liver	1	29109020	ENSSSCG00000004170	SPIN1	17.6717	14.0558	1.91117e-05	3.615	14	2	3	9	10	0	6	4	Active	Active	70.58	5.42	3.04034	2.97562e-15
higher RPS in liver	1	31073654	ENSSSCG00000004183	TAAR2	3.92619	0	5.38254e-09	3.92125	3	0	1	2	0	0	0	0	Inactive	Inactive	0.01	0	-	-
higher RPS in liver	1	31162492	ENSSSCG00000004189	TAAR9	13.4455	2.56038	8.90592e-09	10.8825	10	0	3	7	2	0	0	2	Inactive	Inactive	0.01	0	-	-
higher RPS in liver	1	33319367	ENSSSCG00000004203	L3MBTL3	5.28594	0	2.51221e-08	5.28125	4	0	1	3	0	0	0	0	Active	Active	41.87	10.8	2.10454	1.2435e-25
higher RPS in liver	1	33527734	ENSSSCG00000004205	ARHGAP18	8.13652	4.21477	6.84678e-08	3.9225	6	0	2	4	3	0	3	0	Active	Active	78.86	61.95	0.331711	0.137867
higher RPS in liver	1	34693367	ENSSSCG00000004209	PTPRK	7.44881	1.14404	8.35452e-08	6.30375	6	0	4	2	1	0	1	0	Active	Active	74.13	22.89	1.69761	1.40129e-36
higher RPS in liver	1	37023930	ENSSSCG00000004221	HINT3	14.9881	7.19387	2.4212e-11	7.79375	11	0	2	9	5	0	2	3	Active	Active	50.51	63.93	-0.178404	0.49664
higher RPS in liver	1	37194480	ENSSSCG00000004222	NCOA7	3.56408	0	4.61779e-07	3.55875	3	0	1	2	0	0	0	0	Active	Active	17.35	22.75	-0.167852	0.502622
higher RPS in liver	1	37231385	ENSSSCG00000004223	HEY2	14.1198	10.859	1.65615e-05	3.26	9	0	1	8	7	0	0	7	Active	Active	1.44	2.2	-0.479063	0.224115
higher RPS in liver	1	37640656	ENSSSCG00000004224	HDDC2	10.3474	1.41022	4.00394e-12	8.93875	7	0	0	7	1	0	0	1	Active	Active	10.15	16.18	-0.453878	0.052539
higher RPS in liver	1	44409931	ENSSSCG00000026978	ROS1	13.3961	2.71351	3.35989e-09	10.6825	10	0	2	8	2	0	0	2	Active	Inactive	2.88	3.41	-0.121499	NA
higher RPS in liver	1	44823516	ENSSSCG00000039333	RFX6	7.93549	0	1.56102e-08	7.93125	6	0	0	6	0	0	0	0	Active	Active	1.66	0.18	3.45357	3.24122e-09
higher RPS in liver	1	45170468	ENSSSCG00000025941	PTP4A1	18.0664	4.48795	1.21255e-07	13.5787	13	7	2	4	4	0	1	3	Active	Active	479.43	66.51	3.01962	4.06484e-32
higher RPS in liver	1	50721676	ENSSSCG00000004276	SMAP1	10.7239	0	1.80741e-10	10.7188	8	0	4	4	0	0	0	0	Active	Active	79.2	101.44	-0.326542	0.0633818
higher RPS in liver	1	57424061	ENSSSCG00000004318	RRAGD	7.24778	1.3289	2.23544e-07	5.91875	6	0	0	6	1	0	0	1	Active	Active	3.47	132.66	-5.11919	3.17657e-53
higher RPS in liver	1	58775198	ENSSSCG00000040939	Unknown	15.2301	4.37104	0.00110492	10.8575	27	0	1	26	5	0	0	5	Inactive	Inactive	6.38	8.89	-0.104271	0.808335
higher RPS in liver	1	64044800	ENSSSCG00000004342	NDUFAF4	14.7363	7.43843	2.25747e-06	7.2975	11	0	1	10	6	0	0	6	Active	Active	8.05	15.34	-0.5822	0.0165378
higher RPS in liver	1	64078669	ENSSSCG00000027002	KLHL32	7.58127	2.657	8.31041e-07	4.92375	6	0	1	5	3	0	0	3	Active	Active	6.34	2.5	1.52592	1.97266e-15
higher RPS in liver	1	71166786	ENSSSCG00000037612	LIN28B	8.27518	0	1.59535e-09	8.27125	6	0	0	6	0	0	0	0	Inactive	Inactive	14.81	0.09	8.0316	2.24543e-37
higher RPS in liver	1	72815540	ENSSSCG00000004373	RTN4IP1	4.18195	0	5.69411e-11	4.1775	3	0	0	3	0	0	0	0	Active	Active	44.06	74.84	-0.709946	0.00162252
higher RPS in liver	1	72815612	ENSSSCG00000004374	QRSL1	4.18195	0	5.69411e-11	4.1775	3	0	0	3	0	0	0	0	Active	Active	79.63	150.16	-0.87009	3.5884e-06
higher RPS in liver	1	73124342	ENSSSCG00000031023	Unknown	14.297	1.32669	1.21993e-10	12.97	10	0	7	3	1	0	0	1	Active	Active	57.27	6.55	3.3968	2.92722e-14
higher RPS in liver	1	73130865	ENSSSCG00000037071	TMEM256	15.6673	4.37589	2.27156e-10	11.2937	10	0	5	5	3	0	0	3	Active	Active	883.53	111.73	2.84546	1.5353e-28
higher RPS in liver	1	73968699	ENSSSCG00000033392	SCML4	6.24827	1.37153	1.58624e-07	4.8775	5	0	0	5	1	0	0	1	Active	Inactive	23.09	2.29	3.48118	2.31643e-32
higher RPS in liver	1	74628217	ENSSSCG00000004387	FOXO3B	82.3353	76.0921	4.3238e-05	6.24125	55	15	19	21	50	15	6	29	Active	Active	30.37	43.17	-0.559129	0.00558469
higher RPS in liver	1	75548785	ENSSSCG00000004411	ZBTB24	4.16118	1.10834	0.00290542	3.05125	6	0	0	6	2	0	0	2	Active	Active	6.49	4.92	0.645578	0.000967442
higher RPS in liver	1	75693354	ENSSSCG00000033739	AK9	5.4391	2.18176	0.00354388	3.25625	7	0	0	7	3	0	0	3	Active	Active	0.44	0.9	-1.15332	0.00947126
higher RPS in liver	1	75692932	ENSSSCG00000004405	FIG4	5.4391	2.18176	0.00354388	3.25625	7	0	0	7	3	0	0	3	Inactive	Inactive	25.16	26.12	0.00416486	0.980431
higher RPS in liver	1	75740754	ENSSSCG00000049983	Unknown	7.8297	2.7334	4.50298e-05	5.095	11	0	0	11	5	0	0	5	Inactive	Inactive	0.39	0.39	-	-
higher RPS in liver	1	75979385	ENSSSCG00000004406	GPR6	31.9291	20.9256	0.0156502	11.0025	44	0	2	42	28	0	3	25	Inactive	Inactive	0	0	-	-
higher RPS in liver	1	76179164	ENSSSCG00000004403	CDC40	20.7556	15.506	0.000936805	5.25125	19	2	2	15	15	0	0	15	Active	Active	39.95	33.67	0.373812	0.0877374
higher RPS in liver	1	76367782	ENSSSCG00000004402	METTL24	20.4032	3.87241	1.85258e-05	16.5312	19	1	1	17	5	0	0	5	Active	Active	9.76	4.99	1.10661	0.000466502
higher RPS in liver	1	76357773	ENSSSCG00000049571	Unknown	13.8822	4.88893	0.000858819	8.995	15	0	2	13	7	0	0	7	Inactive	Inactive	0.07	0	-	-
higher RPS in liver	1	76467576	ENSSSCG00000004399	SLC22A16	6.22518	3.1815	0.00194378	3.0425	8	0	0	8	4	0	0	4	Active	Active	3.84	14.78	-1.69975	0.00314559
higher RPS in liver	1	76793384	ENSSSCG00000037424	CDK19	9.71717	3.35923	3.13769e-06	6.3575	7	4	0	3	3	0	2	1	Active	Active	34.44	12.39	1.52515	6.12176e-08
higher RPS in liver	1	76896083	ENSSSCG00000004393	GTF3C6	22.8715	16.4531	2.00839e-08	6.41875	16	8	2	6	11	0	6	5	Active	Active	37.15	22.93	0.874259	2.5543e-05
higher RPS in liver	1	76998359	ENSSSCG00000004419	SLC16A10	14.7682	8.73371	5.79182e-08	6.035	11	0	6	5	6	0	6	0	Active	Active	39.65	32.62	0.0640123	0.798488
higher RPS in liver	1	82251321	ENSSSCG00000023415	SULT1A3	9.33167	1.23494	5.5445e-06	8.095	6	4	0	2	2	0	0	2	Active	Inactive	2566.46	1.33	11.0358	3.22814e-219
higher RPS in liver	1	84545201	ENSSSCG00000004464	TENT5A	14.0746	0.38384	4.6594e-09	13.6862	10	0	6	4	1	0	0	1	Active	Active	93.2	35.23	1.57298	2.38729e-08
higher RPS in liver	1	86516306	ENSSSCG00000004469	LCA5	8.64804	0	1.12602e-10	8.6425	6	0	2	4	0	0	0	0	Active	Inactive	1.05	1.23	-0.0554282	0.911865
higher RPS in liver	1	95354805	ENSSSCG00000004492	SLC14A1	5.69115	0	3.01149e-06	5.68625	5	0	0	5	0	0	0	0	Inactive	Inactive	1.36	0.47	1.6816	0.000170776
higher RPS in liver	1	99081938	ENSSSCG00000004509	LIPG	22.4593	4.30969	1.2396e-09	18.1475	15	11	0	4	3	0	1	2	Active	Active	71.65	2.29	5.12066	4.12835e-45
higher RPS in liver	1	99269536	ENSSSCG00000043017	Unknown	15.8527	10.9658	4.95768e-06	4.88875	11	2	0	9	7	0	2	5	Inactive	Inactive	0.06	0.19	-	-
higher RPS in liver	1	99747458	ENSSSCG00000045942	Unknown	3.13777	0	5.4334e-09	3.13125	2	0	0	2	0	0	0	0	Inactive	Inactive	2.65	3.53	-0.149029	0.631305
higher RPS in liver	1	99841641	ENSSSCG00000041158	Unknown	5.94043	0	2.40622e-09	5.93625	4	0	0	4	0	0	0	0	Inactive	Inactive	0.26	0.36	-	-
higher RPS in liver	1	99976485	ENSSSCG00000004518	SKA1	4.06098	0	1.25004e-12	4.055	3	0	0	3	0	0	0	0	Active	Active	59.19	2.54	4.50876	2.07694e-11
higher RPS in liver	1	104241571	ENSSSCG00000035243	RAB27B	10.4514	0	3.66699e-09	10.4475	9	0	2	7	0	0	0	0	Inactive	Inactive	70.99	1.85	5.45043	2.78892e-65
higher RPS in liver	1	104474489	ENSSSCG00000004534	CCDC68	17.2427	2.74275	4.22404e-11	14.5	13	1	2	10	2	0	0	2	Active	Active	9.38	8.11	0.300511	0.49203
higher RPS in liver	1	106683664	ENSSSCG00000038971	ST8SIA3	3.73843	0	5.21891e-07	3.7325	3	0	0	3	0	0	0	0	Inactive	Inactive	0.77	0.07	4.01144	5.15936e-09
higher RPS in liver	1	106751173	ENSSSCG00000004540	ONECUT2	6.07713	0	2.48253e-07	6.07125	5	0	3	2	0	0	0	0	Active	Active	6.28	0.02	9.17034	8.55578e-21
higher RPS in liver	1	107325190	ENSSSCG00000004550	OAZ2	4.98988	1.33436	8.28243e-08	3.655	4	0	1	3	1	0	1	0	Active	Active	70.05	194.85	-1.55959	2.52386e-09
higher RPS in liver	1	107583273	ENSSSCG00000004551	ZNF609	30.1891	23.6794	1.94087e-06	6.50875	22	0	11	11	17	14	0	3	Active	Active	10.85	14.83	-0.351027	0.0345528
higher RPS in liver	1	107680046	ENSSSCG00000045500	L1TD1	12.5562	8.23304	5.21506e-08	4.32125	9	0	3	6	6	0	3	3	Inactive	Inactive	2.1	3.04	-0.445586	0.119769
higher RPS in liver	1	107690065	ENSSSCG00000004558	CSNK1G1	15.4383	7.51831	7.09814e-09	7.9225	11	0	4	7	5	0	3	2	Active	Active	15.54	16.05	0.0405532	0.756113
higher RPS in liver	1	108649271	ENSSSCG00000004565	CA12	4.28306	0	2.62646e-11	4.2775	3	0	0	3	0	0	0	0	Active	Active	0.9	1	0.204212	0.625479
higher RPS in liver	1	108881552	ENSSSCG00000023158	Unknown	6.80508	1.22919	3.93794e-08	5.57625	5	0	2	3	1	0	0	1	Active	Active	246.48	168.97	0.631074	0.00121325
higher RPS in liver	1	109923168	ENSSSCG00000004573	Unknown	13.6199	5.60656	1.5675e-10	8.015	10	0	2	8	4	0	0	4	Active	Active	16.25	1.14	4.03726	7.87574e-31
higher RPS in liver	1	112540983	ENSSSCG00000004584	GCNT3	16.7898	5.41796	1.31172e-08	11.3688	11	0	6	5	4	0	0	4	Inactive	Inactive	2.21	2.33	0.186321	0.680801
higher RPS in liver	1	113059543	ENSSSCG00000004589	RNF111	10.0189	0	7.75389e-09	10.0137	8	0	6	2	0	0	0	0	Active	Active	28.94	19.65	0.618072	1.97432e-07
higher RPS in liver	1	113715620	ENSSSCG00000025578	ALDH1A2	13.1178	0	8.25263e-08	13.1137	12	0	6	6	0	0	0	0	Inactive	Inactive	5.69	12.6	-1.39721	0.0119545
higher RPS in liver	1	113848685	ENSSSCG00000004597	AQP9	6.52148	0	3.97579e-09	6.51625	4	4	0	0	0	0	0	0	Active	Inactive	772.44	3.31	7.7665	4.98236e-64
higher RPS in liver	1	114598823	ENSSSCG00000035038	CGNL1	28.2337	10.4206	4.47716e-09	17.8125	20	7	5	8	8	0	5	3	Active	Active	63.69	13.04	2.35841	1.66823e-39
higher RPS in liver	1	116532934	ENSSSCG00000032619	PIGB	11.9687	7.31375	5.43091e-08	4.655	8	0	0	8	5	0	0	5	Active	Active	16.4	13.75	0.292249	0.155386
higher RPS in liver	1	116533024	ENSSSCG00000004612	RAB27A	11.9687	7.31375	5.43091e-08	4.655	8	0	0	8	5	0	0	5	Active	Active	27.25	5.12	2.64192	1.12163e-12
higher RPS in liver	1	118913785	ENSSSCG00000004616	ONECUT1	7.24781	0	2.9356e-07	7.24375	6	1	0	5	0	0	0	0	Active	Active	52.78	0.5	6.99905	7.64832e-106
higher RPS in liver	1	119134313	ENSSSCG00000004620	MYO5A	8.12007	1.13054	1.88582e-08	6.99	6	1	0	5	1	0	1	0	Active	Active	88.51	150.22	-0.692968	0.00261342
higher RPS in liver	1	122633736	ENSSSCG00000004653	SECISBP2L	3.94118	0	9.15561e-10	3.935	3	0	2	1	0	0	0	0	Active	Active	132.73	86.3	0.718231	0.000846771
higher RPS in liver	1	123102009	ENSSSCG00000004658	FBN1	8.7635	5.70699	0.000370872	3.05875	7	0	4	3	5	0	2	3	Active	Active	43.71	500.03	-3.39454	8.32114e-34
higher RPS in liver	1	125794655	ENSSSCG00000044345	Unknown	8.22774	0.97568	0.000417501	7.24875	11	0	0	11	2	0	0	2	Inactive	Inactive	0.23	0.11	-	-
higher RPS in liver	1	126620118	ENSSSCG00000004675	DUOX1	9.24797	5.67281	8.4916e-07	3.57625	6	2	0	4	4	0	0	4	Inactive	Inactive	0.04	2.27	-6.22082	3.23773e-25
higher RPS in liver	1	126652463	ENSSSCG00000004676	DUOXA2	6.61689	0	9.021e-10	6.61125	5	3	0	2	0	0	0	0	Inactive	Inactive	3	2.68	0.639315	NA
higher RPS in liver	1	126605142	ENSSSCG00000004677	DUOXA1	13.4193	9.81758	1.36038e-06	3.60125	9	2	0	7	7	0	0	7	Active	Active	0.15	0.6	-2.48833	0.000895393
higher RPS in liver	1	126620477	ENSSSCG00000004678	DUOX2	9.24797	5.67281	8.4916e-07	3.57625	6	2	0	4	4	0	0	4	Inactive	Inactive	2.67	0.88	2.28801	NA
higher RPS in liver	1	126768708	ENSSSCG00000004680	TERB2	6.31533	1.23787	1.51389e-07	5.07875	5	0	0	5	1	0	0	1	Inactive	Inactive	7.57	0.46	4.15654	4.52559e-13
higher RPS in liver	1	128489687	ENSSSCG00000004718	TTBK2	22.8459	18.1594	6.73695e-06	4.6875	17	0	0	17	14	0	3	11	Active	Active	13.56	18.96	-0.435887	0.00435783
higher RPS in liver	1	128888947	ENSSSCG00000038735	SNAP23	6.31739	2.52775	0.000282523	3.78875	5	0	0	5	2	0	0	2	Active	Active	223.55	95.33	1.28482	1.05698e-05
higher RPS in liver	1	129201069	ENSSSCG00000004732	PLA2G4F	11.3378	1.33924	9.26771e-10	9.995	9	0	2	7	1	0	1	0	Inactive	Inactive	0.12	0	-	-
higher RPS in liver	1	130563562	ENSSSCG00000032022	GCHFR	10.7483	5.25027	2.8831e-07	5.4975	8	0	0	8	4	0	0	4	Active	Active	31.65	4.74	2.5667	9.21522e-22
higher RPS in liver	1	130563488	ENSSSCG00000043412	Unknown	10.7483	5.25027	2.8831e-07	5.4975	8	0	0	8	4	0	0	4	Active	Active	0	0	-	-
higher RPS in liver	1	130728737	ENSSSCG00000039107	KNL1	22.8246	12.5821	1.67745e-06	10.2425	19	0	5	14	10	0	2	8	Active	Active	31.03	5	2.65379	0.00295648
higher RPS in liver	1	130728769	ENSSSCG00000042522	KNL1	22.8246	12.5821	1.67745e-06	10.2425	19	0	5	14	10	0	2	8	Active	Active	9.95	2.16	2.21467	0.0257847
higher RPS in liver	1	130753186	ENSSSCG00000038033	CCDC32	10.6751	0	3.18624e-10	10.67	8	0	2	6	0	0	0	0	Active	Active	44.22	45.14	0.101055	0.614699
higher RPS in liver	1	130878321	ENSSSCG00000004772	BAHD1	10.245	4.68994	5.41903e-05	5.55375	8	0	2	6	4	0	0	4	Active	Active	8.99	8.07	0.199811	0.358398
higher RPS in liver	1	130974667	ENSSSCG00000023975	CCDC9B	16.242	11.7221	1.24675e-05	4.52125	11	0	0	11	8	0	2	6	Active	Active	4.15	67.09	-3.88025	7.81588e-71
higher RPS in liver	1	131241612	ENSSSCG00000004785	SRP14	7.50165	1.4641	7.59241e-08	6.0375	6	0	2	4	1	0	1	0	Active	Active	271.22	231.23	0.380243	0.0421497
higher RPS in liver	1	131510455	ENSSSCG00000040418	FSIP1	9.12047	0	7.13025e-08	9.11375	8	0	0	8	0	0	0	0	Active	Active	1.05	0.74	0.697067	0.022923
higher RPS in liver	1	132702541	ENSSSCG00000004791	RASGRP1	12.0869	4.96541	5.49969e-07	7.12125	9	0	0	9	4	0	0	4	Active	Active	5.23	2.29	1.3663	5.2058e-06
higher RPS in liver	1	133016467	ENSSSCG00000039393	SPRED1	18.6347	13.3915	8.4531e-06	5.2425	14	0	2	12	10	0	0	10	Active	Active	33.11	26.11	0.447437	0.108551
higher RPS in liver	1	133155170	ENSSSCG00000043630	Unknown	7.68332	2.8809	0.000119198	4.8025	9	0	3	6	3	0	1	2	Inactive	Inactive	0.42	0.58	-0.236805	0.508295
higher RPS in liver	1	134013820	ENSSSCG00000004795	MEIS2	19.8992	5.243	3.24777e-10	14.655	14	0	1	13	4	0	0	4	Active	Active	11.43	6.08	1.09568	1.65977e-05
higher RPS in liver	1	134525831	ENSSSCG00000042387	Unknown	10.7304	2.28145	0.000590159	8.4475	22	0	1	21	5	0	0	5	Inactive	Inactive	0.12	0.11	-	-
higher RPS in liver	1	139804583	ENSSSCG00000004825	CHSY1	31.3733	20.5305	1.05872e-10	10.8413	22	3	14	5	14	0	6	8	Active	Active	22.11	26.21	-0.133266	0.355103
higher RPS in liver	1	143867853	ENSSSCG00000004844	MTMR10	9.49843	0.984292	1.15513e-09	8.515	7	0	4	3	1	0	0	1	Active	Active	56.88	32.84	0.784303	6.92014e-05
higher RPS in liver	1	144071859	ENSSSCG00000004849	APBA2	3.94192	0	9.83203e-10	3.9375	3	0	0	3	0	0	0	0	Active	Active	0.07	0.12	-	-
higher RPS in liver	1	145508636	ENSSSCG00000005785	PCSK6	5.96249	0	7.54094e-08	5.95625	5	4	1	0	0	0	0	0	Active	Active	112.63	20.1	2.5054	8.64529e-17
higher RPS in liver	1	145707412	ENSSSCG00000005786	SNRPA1	12.4516	8.8487	1.21818e-07	3.6025	9	0	6	3	6	0	2	4	Active	Active	150.26	87.45	0.981953	9.71419e-05
higher RPS in liver	1	147568673	ENSSSCG00000038767	MBP	12.9152	2.61892	4.28902e-10	10.2963	9	0	4	5	2	0	0	2	Active	Active	47.15	39.09	0.350462	0.257526
higher RPS in liver	1	149516790	ENSSSCG00000033971	ZNF407	4.16826	0.690431	0.000929907	3.47375	4	0	1	3	1	0	0	1	Active	Active	14.85	15.51	-0.0526403	0.743806
higher RPS in liver	1	149584292	ENSSSCG00000004870	CNDP2	21.2569	12.7974	8.00824e-06	8.45875	16	9	1	6	9	0	0	9	Active	Active	382.01	62.69	2.65257	9.91311e-40
higher RPS in liver	1	149737571	ENSSSCG00000004875	CYB5A	15.7882	1.26472	1.97822e-09	14.525	11	10	0	1	1	0	0	1	Active	Active	4572.87	185.46	4.67167	6.77945e-90
higher RPS in liver	1	150433327	ENSSSCG00000041473	Unknown	13.9113	4.55658	0.0002978	9.35375	23	0	0	23	8	0	0	8	Inactive	Inactive	0.82	1.13	0.0027503	0.99747
higher RPS in liver	1	154596530	ENSSSCG00000037349	Unknown	4.67626	0	2.90067e-05	4.6725	4	0	0	4	0	0	0	0	Inactive	Inactive	0	0.04	-	-
higher RPS in liver	1	157937594	ENSSSCG00000034000	Unknown	5.38439	0	1.9057e-08	5.38	4	0	0	4	0	0	0	0	Inactive	Inactive	0.96	0.66	0.73785	0.0776123
higher RPS in liver	1	157998842	ENSSSCG00000004891	SERPINB7	11.7471	2.0427	5.32539e-08	9.705	9	0	2	7	2	0	0	2	Active	Inactive	62.02	0.31	8.05205	2.70903e-18
higher RPS in liver	1	158012306	ENSSSCG00000049954	Unknown	9.28045	2.67781	9.57756e-07	6.60125	7	0	0	7	2	0	0	2	Inactive	Inactive	53.89	18.83	1.95166	0.000349186
higher RPS in liver	1	158053372	ENSSSCG00000033560	SERPINB3	7.44578	4.36662	0.00261357	3.07875	5	0	0	5	3	0	0	3	Inactive	Inactive	0.13	0	-	-
higher RPS in liver	1	158233051	ENSSSCG00000004893	VPS4B	5.14855	1.29575	7.62516e-09	3.855	4	0	0	4	1	0	1	0	Active	Active	143.42	57.65	1.4379	1.94118e-10
higher RPS in liver	1	158862706	ENSSSCG00000004896	PHLPP1	30.6523	25.4261	2.67178e-06	5.225	22	7	7	8	18	17	0	1	Active	Active	9.11	15.8	-0.736742	5.98969e-06
higher RPS in liver	1	162933131	ENSSSCG00000004921	ATP8B1	5.30532	0	2.64305e-07	5.29875	4	0	2	2	0	0	0	0	Inactive	Inactive	62.03	22.37	1.67715	6.70944e-15
higher RPS in liver	1	163630366	ENSSSCG00000004937	SLC24A1	12.6499	6.53713	5.01297e-09	6.1125	9	0	4	5	5	0	2	3	Inactive	Inactive	1.67	0.46	2.02169	2.4631e-09
higher RPS in liver	1	163790196	ENSSSCG00000004938	DENND4A	14.3132	1.23844	3.96428e-11	13.0762	11	0	6	5	1	0	0	1	Active	Active	56.58	31.87	0.848184	6.77254e-05
higher RPS in liver	1	164310448	ENSSSCG00000004941	DIS3L	5.14943	1.29945	1.40068e-08	3.85	4	0	0	4	1	0	1	0	Active	Active	13.48	18.18	-0.319499	0.0459393
higher RPS in liver	1	164369225	ENSSSCG00000004942	TIPIN	9.73362	2.74457	1.74625e-08	6.9875	7	0	1	6	2	0	0	2	Active	Active	15.55	11.81	0.546047	0.0118115
higher RPS in liver	1	164381845	ENSSSCG00000004943	MAP2K1	10.4041	5.97487	3.66194e-07	4.43	7	0	2	5	4	0	0	4	Active	Active	60.49	136.73	-1.13963	2.97636e-09
higher RPS in liver	1	164474978	ENSSSCG00000038941	SNAPC5	11.55	4.5551	8.55154e-08	6.9975	8	0	1	7	3	0	0	3	Active	Active	8.51	10.11	-0.173417	0.509375
higher RPS in liver	1	164657086	ENSSSCG00000004948	SMAD6	19.1497	16.082	0.00112557	3.07	14	5	3	6	11	0	3	8	Active	Active	17.91	6.64	1.27675	3.91968e-06
higher RPS in liver	1	165753522	ENSSSCG00000004956	SKOR1	11.4891	0	1.81397e-10	11.485	9	0	2	7	0	0	0	0	Active	Active	0.03	0.11	-	-
higher RPS in liver	1	165853126	ENSSSCG00000004958	PIAS1	10.8377	0	2.42503e-09	10.8313	9	0	1	8	0	0	0	0	Inactive	Inactive	47.2	70.17	-0.523911	0.0191344
higher RPS in liver	1	166633289	ENSSSCG00000047355	Unknown	7.80488	4.45893	0.000145658	3.345	7	0	0	7	5	0	1	4	Inactive	Inactive	0.73	0.82	0.43362	0.664542
higher RPS in liver	1	167855911	ENSSSCG00000004971	TLE3	4.70098	0	1.82207e-08	4.6975	4	0	1	3	0	0	0	0	Active	Active	10.12	11.86	-0.258212	0.220795
higher RPS in liver	1	168800525	ENSSSCG00000045715	Unknown	19.2733	13.4	0.00281245	5.875	26	0	6	20	16	1	3	12	Inactive	Inactive	0	0.51	-6.68768	4.77062e-07
higher RPS in liver	1	175448276	ENSSSCG00000004999	MIS18BP1	3.16778	0	6.99995e-07	3.1625	3	0	0	3	0	0	0	0	Active	Active	25.32	16.89	0.603815	0.0286327
higher RPS in liver	1	179697615	ENSSSCG00000005012	ARF6	45.2976	19.2553	1.91535e-10	26.0463	30	0	9	21	12	0	2	10	Active	Active	144.47	63.29	1.30242	2.0001e-12
higher RPS in liver	1	179906967	ENSSSCG00000036735	VCPKMT	18.4369	13.6754	5.72541e-06	4.76125	13	0	1	12	9	0	2	7	Active	Active	49.35	36.05	0.606794	0.0183206
higher RPS in liver	1	180299496	ENSSSCG00000036634	MAP4K5	26.483	13.973	4.20389e-09	12.51	19	0	15	4	9	0	3	6	Active	Active	31.07	30.94	0.180332	0.367836
higher RPS in liver	1	180299469	ENSSSCG00000005020	ATL1	26.483	13.973	4.20389e-09	12.51	19	0	15	4	9	0	3	6	Active	Active	1.75	0.96	1.30105	0.0109036
higher RPS in liver	1	180719979	ENSSSCG00000005024	PYGL	6.60208	1.2883	1.7568e-08	5.315	5	0	2	3	1	0	0	1	Inactive	Inactive	374.26	50.07	2.84704	1.86245e-42
higher RPS in liver	1	181955307	ENSSSCG00000021862	PTGER2	5.38683	1.34716	4.56436e-11	4.03875	4	0	1	3	1	0	0	1	Active	Active	1.5	1.98	-0.141926	0.629277
higher RPS in liver	1	182606869	ENSSSCG00000005041	FERMT2	23.3201	17.3128	4.20347e-06	6.00375	15	9	0	6	12	8	1	3	Inactive	Active	239.54	325.52	-0.394544	0.060725
higher RPS in liver	1	184599599	ENSSSCG00000005057	FBXO34	13.7332	1.31188	2.57351e-10	12.4225	10	0	1	9	1	0	1	0	Active	Active	31.84	23.79	0.444905	0.0156537
higher RPS in liver	1	184881550	ENSSSCG00000005060	KTN1	12.5449	0	7.54895e-08	12.5412	10	2	4	4	0	0	0	0	Active	Active	347.38	294.57	0.341261	0.20425
higher RPS in liver	1	191028346	ENSSSCG00000037043	Unknown	4.89313	0	5.94202e-08	4.8875	4	0	2	2	0	0	0	0	Inactive	Inactive	3.77	0.09	5.33728	1.90108e-36
higher RPS in liver	1	196129905	ENSSSCG00000005125	LRRC19	9.4072	0	9.16941e-10	9.4025	7	0	1	6	0	0	0	0	Inactive	Inactive	0.75	1.33	-0.639345	0.166789
higher RPS in liver	1	200414334	ENSSSCG00000005131	DMRTA1	11.695	0	1.64034e-10	11.6913	8	0	1	7	0	0	0	0	Active	Active	4.49	0.24	4.62449	1.76006e-15
higher RPS in liver	1	200918079	ENSSSCG00000041931	Unknown	7.90079	4.04826	3.66593e-07	3.85375	6	0	1	5	3	0	0	3	Inactive	Inactive	1.32	2.33	-0.496623	0.210331
higher RPS in liver	1	201221665	ENSSSCG00000005136	IFNE	5.92011	0	0.00226084	5.91625	5	0	0	5	0	0	0	0	Inactive	Inactive	0.24	0.3	-	-
higher RPS in liver	1	201246611	ENSSSCG00000031529	IFNW1	5.63847	0	0.00232397	5.63375	6	0	0	6	0	0	0	0	Inactive	Inactive	0.03	0	-	-
higher RPS in liver	1	201392587	ENSSSCG00000043301	IFN-ALPHA-8	14.4852	9.77033	0.000782776	4.715	14	0	0	14	8	0	1	7	Inactive	Inactive	0.23	0.33	-	-
higher RPS in liver	1	201408266	ENSSSCG00000045163	IFN-ALPHA-9	15.7131	12.606	0.00973667	3.1025	14	0	0	14	11	0	1	10	Inactive	Inactive	0	0	-	-
higher RPS in liver	1	201573611	ENSSSCG00000051765	Unknown	6.37166	3.31018	2.08055e-06	3.06	4	0	1	3	2	0	0	2	Inactive	Inactive	2.4	2.61	0.076476	0.853883
higher RPS in liver	1	201654500	ENSSSCG00000005152	IFN-DELTA-1	21.5199	17.2828	3.05376e-05	4.235	14	0	0	14	12	0	2	10	Inactive	Inactive	0.87	1.03	0.102828	0.876709
higher RPS in liver	1	201673749	ENSSSCG00000034940	IFN-DELTA-9	26.0525	20.7265	0.00405095	5.32875	24	0	0	24	17	0	5	12	Active	Active	0	0.06	-	-
higher RPS in liver	1	201677540	ENSSSCG00000031149	IFN-ALPHA-15	21.7915	14.5362	1.13688e-06	7.2525	20	0	1	19	12	0	3	9	Inactive	Inactive	0.34	0.17	-	-
higher RPS in liver	1	201678376	ENSSSCG00000047475	IFNA1	21.7915	14.5362	1.13688e-06	7.2525	20	0	1	19	12	0	3	9	Inactive	Inactive	0.03	0	-	-
higher RPS in liver	1	202317453	ENSSSCG00000005166	MLLT3	21.3025	12.9262	3.79964e-08	8.38	15	0	0	15	9	0	0	9	Active	Active	4.34	32.9	-2.86433	2.00191e-19
higher RPS in liver	1	203444450	ENSSSCG00000005169	RPS6	3.87943	0	2.54301e-07	3.875	3	0	1	2	0	0	0	0	Active	Active	777.73	873.83	-0.0675276	0.675612
higher RPS in liver	1	203683862	ENSSSCG00000035863	PLIN2	4.82791	1.57642	1.79365e-08	3.2525	3	0	3	0	1	1	0	0	Active	Active	176.83	432.47	-0.975126	0.000149038
higher RPS in liver	1	207252396	ENSSSCG00000005184	SNAPC3	17.117	11.6107	8.00512e-09	5.50625	12	5	1	6	8	0	0	8	Active	Active	12.37	31.8	-1.28595	6.50122e-16
higher RPS in liver	1	208175194	ENSSSCG00000005190	NFIB	29.7766	12.4228	4.58327e-09	17.355	24	12	7	5	9	1	0	8	Active	Active	44.13	168	-1.67499	2.29098e-19
higher RPS in liver	1	209668894	ENSSSCG00000036360	LURAP1L	6.5624	1.05424	3.03611e-06	5.51	5	0	2	3	1	0	0	1	Active	Active	25.63	5.88	2.35772	1.39431e-20
higher RPS in liver	1	215842113	ENSSSCG00000021136	TPD52L3	10.0966	2.61174	5.47888e-08	7.485	8	0	3	5	2	0	0	2	Inactive	Inactive	0.44	0.07	-	-
higher RPS in liver	1	217204965	ENSSSCG00000005217	RCL1	14.2678	1.41251	8.32575e-10	12.8537	11	0	2	9	1	0	1	0	Active	Active	553.5	47.74	3.55734	3.89686e-97
higher RPS in liver	1	218340446	ENSSSCG00000005225	RFX3	6.8447	0	3.59946e-06	6.83875	6	0	0	6	0	0	0	0	Active	Active	8.03	8.69	0.0526355	0.813444
higher RPS in liver	1	221491953	ENSSSCG00000005240	DOCK8	6.702	0	6.27435e-10	6.6975	5	0	2	3	0	0	0	0	Active	Active	26.26	8.82	1.82303	4.05605e-12
higher RPS in liver	1	221521302	ENSSSCG00000005241	CBWD3	23.2523	0	3.27868e-11	23.2462	16	0	11	5	0	0	0	0	Active	Active	105.57	47.92	1.35183	1.68985e-11
higher RPS in liver	1	221973181	ENSSSCG00000044242	Unknown	8.10763	2.0179	0.000511993	6.08875	10	0	0	10	3	0	0	3	Inactive	Inactive	0.42	3.04	-2.73931	2.68973e-05
higher RPS in liver	1	222412500	ENSSSCG00000032999	FXN	14.001	10.2306	0.000142581	3.77125	10	0	2	8	7	0	2	5	Active	Active	42.47	63.17	-0.437746	0.113834
higher RPS in liver	1	223001839	ENSSSCG00000044374	Unknown	7.9392	4.54253	4.04239e-05	3.39625	5	0	0	5	3	0	0	3	Inactive	Inactive	0.88	1.75	-0.763975	0.00816414
higher RPS in liver	1	225041575	ENSSSCG00000024257	CEMIP2	9.80695	5.73829	1.36282e-07	4.06875	7	0	4	3	4	0	1	3	Active	Active	45.76	26.31	0.940561	6.91553e-06
higher RPS in liver	1	226217312	ENSSSCG00000028996	ALDH1A1	4.72392	0	2.37784e-10	4.71875	3	3	0	0	0	0	0	0	Active	Active	7333.08	20.04	8.29169	9.83705e-59
higher RPS in liver	1	226295226	ENSSSCG00000041232	Unknown	27.2217	7.07838	1.83343e-11	20.1438	19	0	1	18	5	0	0	5	Inactive	Inactive	1	1.14	-0.0408962	0.910135
higher RPS in liver	1	227858464	ENSSSCG00000048925	Unknown	26.6295	6.202	3.36832e-10	20.4288	19	0	2	17	4	0	0	4	Inactive	Inactive	0.65	1.56	-1.34938	0.000144374
higher RPS in liver	1	228141890	ENSSSCG00000005272	NMRK1	6.51543	0	2.76591e-09	6.51	5	0	5	0	0	0	0	0	Active	Active	196.18	4.94	5.39293	9.88681e-64
higher RPS in liver	1	228142041	ENSSSCG00000005273	OSTF1	6.51543	0	2.76591e-09	6.51	5	0	5	0	0	0	0	0	Active	Active	280.06	38.62	2.9531	2.43317e-22
higher RPS in liver	1	230546120	ENSSSCG00000005284	GNA14	5.26962	0	1.15597e-09	5.26375	4	0	0	4	0	0	0	0	Active	Active	26.74	0.88	5.03032	4.28966e-44
higher RPS in liver	1	236587251	ENSSSCG00000005326	Unknown	6.66325	2.53754	7.63091e-06	4.12625	5	0	0	5	2	0	2	0	Inactive	Inactive	0	0	-	-
higher RPS in liver	1	236597257	ENSSSCG00000051658	OR13J1	7.08082	2.63881	1.52546e-06	4.44375	5	0	0	5	2	0	1	1	Inactive	Inactive	0.02	0	-	-
higher RPS in liver	1	236710632	ENSSSCG00000048280	OR2S2	8.05043	4.1779	3.73861e-06	3.87125	6	0	0	6	3	0	0	3	Inactive	Inactive	0.01	0	-	-
higher RPS in liver	1	238333029	ENSSSCG00000050320	Unknown	4.79878	1.55638	2.90016e-05	3.24125	4	0	3	1	1	0	1	0	Active	Active	19.03	15.6	0.337771	0.11977
higher RPS in liver	1	238667617	ENSSSCG00000032554	SLC25A51	13.8746	8.61466	5.11521e-08	5.26125	10	0	3	7	6	0	2	4	Active	Active	71.98	80.04	-0.0722091	0.759382
higher RPS in liver	1	238826429	ENSSSCG00000005358	SHB	22.5734	15.7933	5.99289e-06	6.78375	16	2	1	13	11	0	0	11	Active	Active	28.24	9.12	1.51629	2.89067e-06
higher RPS in liver	1	239110018	ENSSSCG00000005361	ALDH1B1	17.9229	3.23697	7.11658e-10	14.685	13	0	0	13	2	0	0	2	Active	Active	106.2	3.45	4.92775	2.68668e-90
higher RPS in liver	1	239136370	ENSSSCG00000005360	IGFBPL1	3.63787	0	1.10291e-06	3.63375	3	0	0	3	0	0	0	0	Active	Active	0.06	0.1	-	-
higher RPS in liver	1	239278053	ENSSSCG00000042419	Unknown	4.08489	0	1.00671e-08	4.08	3	0	0	3	0	0	0	0	Inactive	Inactive	0.08	1.2	-4.42253	0.000103264
higher RPS in liver	1	239492886	ENSSSCG00000005367	TSTD2	6.38842	0	1.6778e-09	6.385	5	2	0	3	0	0	0	0	Active	Active	65.44	51.3	0.416967	0.0183849
higher RPS in liver	1	243027837	ENSSSCG00000042524	Unknown	15.5314	8.93082	8.6142e-07	6.6025	8	0	0	8	5	0	0	5	Inactive	Inactive	2.23	2.1	0.339708	0.22736
higher RPS in liver	1	242995722	ENSSSCG00000038171	Unknown	8.003	1.89815	9.49549e-09	6.105	5	0	2	3	1	0	0	1	Active	Inactive	239.99	0.27	10.1149	1.3744e-144
higher RPS in liver	1	243039581	ENSSSCG00000005398	Unknown	15.9466	6.77846	1.96313e-09	9.1675	9	0	0	9	4	0	0	4	Active	Inactive	460.38	0.64	9.65604	4.96332e-163
higher RPS in liver	1	243107460	ENSSSCG00000027974	MRPL50	9.05879	0	7.10709e-07	9.05375	8	0	1	7	0	0	0	0	Active	Active	42.37	30.19	0.55906	0.0147104
higher RPS in liver	1	243106972	ENSSSCG00000034239	ZNF189	9.05879	0	7.10709e-07	9.05375	8	0	1	7	0	0	0	0	Active	Active	37.49	30.7	0.464707	0.00773152
higher RPS in liver	1	243141418	ENSSSCG00000038300	ALDOB	10.9623	2.54261	7.99057e-09	8.42	8	0	1	7	2	0	0	2	Active	Inactive	9950.2	1.28	12.9121	3.44257e-105
higher RPS in liver	1	246085855	ENSSSCG00000035397	RRAS2	4.42655	0	7.20247e-05	4.42125	4	0	0	4	0	0	0	0	Active	Active	0	0	-	-
higher RPS in liver	1	246278492	ENSSSCG00000005423	ABCA1	30.6631	19.6579	2.47871e-07	11.005	22	16	2	4	14	0	6	8	Active	Active	141.57	14.34	3.43855	1.01226e-32
higher RPS in liver	1	246548497	ENSSSCG00000005425	SLC44A1	6.26382	0	1.30893e-08	6.25875	5	2	0	3	0	0	0	0	Active	Active	141.53	77.71	0.892272	5.23412e-05
higher RPS in liver	1	248448265	ENSSSCG00000005436	RAD23B	5.63995	0	1.68533e-07	5.635	4	0	3	1	0	0	0	0	Active	Active	209.8	255.88	-0.271737	0.0572084
higher RPS in liver	1	249100395	ENSSSCG00000051392	Unknown	5.14851	2.0417	0.00576837	3.105	10	0	0	10	4	0	2	2	Inactive	Inactive	0.25	0.28	-	-
higher RPS in liver	1	250368846	ENSSSCG00000005446	EPB41L4B	17.5321	10.0746	1.06326e-07	7.45625	12	0	7	5	7	0	3	4	Active	Active	28.4	4.89	2.546	6.09739e-49
higher RPS in liver	1	252956341	ENSSSCG00000005465	SUSD1	5.71624	0	7.48315e-10	5.7125	4	0	0	4	0	0	0	0	Active	Active	8.67	2.43	2.00177	1.1667e-13
higher RPS in liver	1	253093050	ENSSSCG00000005466	PTBP3	40.4614	15.483	2.01411e-09	24.9775	29	0	9	20	12	0	2	10	Active	Active	62.31	19.03	1.89906	4.03638e-11
higher RPS in liver	1	253124471	ENSSSCG00000005467	HSDL2	25.6403	14.4984	1.25932e-08	11.1387	17	1	3	13	10	0	3	7	Active	Active	778.65	537.22	0.485748	0.0184738
higher RPS in liver	1	255211929	ENSSSCG00000042680	TEX48	8.86922	1.33444	2.33861e-11	7.53375	6	0	6	0	1	0	0	1	Inactive	Inactive	0.07	0	-	-
higher RPS in liver	1	255349456	ENSSSCG00000034087	TNFSF15	5.97217	0	1.58421e-10	5.96625	4	0	4	0	0	0	0	0	Active	Active	2.82	1.05	1.45642	0.000373986
higher RPS in liver	1	261407716	ENSSSCG00000036639	STOM	8.08652	3.02463	5.80155e-08	5.06375	5	0	5	0	2	0	2	0	Active	Active	122.62	135.85	-0.121344	0.697213
higher RPS in liver	1	262830498	ENSSSCG00000027732	OR1J4	17.825	7.41924	0.00141281	10.4075	20	0	0	20	8	0	0	8	Inactive	Inactive	0.04	0	-	-
higher RPS in liver	1	265077588	ENSSSCG00000005587	NEK6	5.02339	1.2486	7.72257e-08	3.7725	3	0	0	3	1	0	1	0	Active	Active	74.32	12.1	2.66997	1.32127e-54
higher RPS in liver	1	265235400	ENSSSCG00000005590	PSMB7	4.15698	0	1.41085e-09	4.1525	3	0	2	1	0	0	0	0	Active	Active	513.37	566.22	-0.0921119	0.664453
higher RPS in liver	1	268237459	ENSSSCG00000005619	TOR2A	24.1329	19.6518	3.42112e-06	4.4825	16	0	3	13	12	0	0	12	Active	Active	6.05	5.5	-0.215617	0.476345
higher RPS in liver	1	268531752	ENSSSCG00000005636	SLC25A25	4.83176	1.43088	0.011908	3.4025	4	0	0	4	1	0	0	1	Active	Active	92	83.36	0.00367078	0.991031
higher RPS in liver	1	269167196	ENSSSCG00000005662	SPOUT1	4.68514	0	1.05223e-08	4.67875	3	0	0	3	0	0	0	0	Active	Active	20.27	8.36	1.13322	1.71924e-05
higher RPS in liver	1	269259156	ENSSSCG00000005666	DOLK	14.4893	7.75667	4.69359e-06	6.73375	10	0	0	10	5	0	0	5	Active	Active	14.3	21.77	-0.711362	0.0286379
higher RPS in liver	1	269259519	ENSSSCG00000005667	NUP188	14.4893	7.75667	4.69359e-06	6.73375	10	0	0	10	5	0	0	5	Active	Active	8.31	22.5	-1.26119	1.02745e-05
higher RPS in liver	1	269816647	ENSSSCG00000032122	C9orf50	29.9145	22.8823	5.42544e-07	7.03375	19	0	2	17	14	0	0	14	Active	Inactive	0.28	0.39	-	-
higher RPS in liver	1	269819750	ENSSSCG00000005678	NTMT1	29.9145	22.8823	5.42544e-07	7.03375	19	0	2	17	14	0	0	14	Active	Active	16.51	73.73	-2.04292	6.34333e-12
higher RPS in liver	1	270180188	ENSSSCG00000005689	FNBP1	25.1994	10.4449	2.11727e-09	14.755	16	0	7	9	7	0	2	5	Active	Active	42.61	18.62	1.24877	1.81336e-06
higher RPS in liver	1	270190509	ENSSSCG00000038868	GPR107	28.2155	11.8877	1.51981e-09	16.3275	18	0	9	9	8	0	4	4	Active	Active	18.52	26.84	-0.479617	0.000570082
higher RPS in liver	1	270723880	ENSSSCG00000005703	PRDM12	20.2555	16.5183	6.02482e-05	3.73875	14	0	2	12	11	0	1	10	Active	Active	0.06	0	-	-
higher RPS in liver	1	272836449	ENSSSCG00000031532	GBGT1	5.27724	1.4331	4.87387e-06	3.8425	4	0	0	4	1	0	0	1	Active	Active	7.65	7.82	-0.111351	0.709113
higher RPS in liver	1	272860959	ENSSSCG00000043049	OBP2A	11.1352	5.61225	1.70767e-07	5.52	7	0	2	5	5	0	1	4	Inactive	Active	0.12	0	-	-
higher RPS in liver	1	272955197	ENSSSCG00000032106	SURF6	6.88207	1.95406	1.14638e-06	4.92875	6	0	1	5	2	0	0	2	Active	Active	37.46	30.68	0.395943	0.171778
higher RPS in liver	1	273560315	ENSSSCG00000024912	WDR5	23.0792	16.1471	0.000205612	6.93375	18	9	1	8	14	0	0	14	Active	Active	64.64	65.28	-0.0282421	0.885809
higher RPS in liver	1	273656888	ENSSSCG00000050374	Unknown	21.6359	8.07293	1.46132e-05	13.5638	15	8	0	7	8	0	0	8	Active	Inactive	0.16	0.06	-	-
higher RPS in liver	1	273705503	ENSSSCG00000038220	RXRA	41.133	30.6688	6.51961e-05	10.4637	25	7	1	17	22	0	0	22	Active	Active	69.53	52.57	0.195327	0.305856
higher RPS in liver	13	782476	ENSSSCG00000039788	FAM136A	5.69576	0	3.957e-07	5.69125	4	0	0	4	0	0	0	0	Inactive	Inactive	2.79	4.58	-0.367573	0.547604
higher RPS in liver	13	10756926	ENSSSCG00000027017	NR1D2	3.99516	0	1.50992e-07	3.98875	3	0	0	3	0	0	0	0	Active	Active	78.19	124.77	-0.60992	0.0655226
higher RPS in liver	13	11359544	ENSSSCG00000036033	THRB	13.0533	2.71305	0.00107243	10.34	12	0	6	6	2	0	1	1	Active	Active	16.74	16.47	0.113944	0.766589
higher RPS in liver	13	12118844	ENSSSCG00000044771	Unknown	4.0792	0	0.00301122	4.07625	7	0	1	6	0	0	0	0	Inactive	Inactive	0.04	0.22	-	-
higher RPS in liver	13	14215797	ENSSSCG00000040057	EOMES	6.73896	0	8.94778e-08	6.73375	6	0	0	6	0	0	0	0	Active	Active	1.12	0.05	5.38185	1.50912e-07
higher RPS in liver	13	16784491	ENSSSCG00000011226	TGFBR2	11.1282	0	1.54398e-06	11.1237	9	6	2	1	0	0	0	0	Active	Active	118.82	162.64	-0.434137	0.00839694
higher RPS in liver	13	18372194	ENSSSCG00000011234	CMTM7	13.5977	7.13861	6.14201e-07	6.46	10	0	7	3	5	0	1	4	Active	Active	13.6	10.26	0.342801	0.13636
higher RPS in liver	13	18485450	ENSSSCG00000038362	CMTM6	17.3543	9.41725	7.93927e-10	7.93875	11	0	0	11	6	0	0	6	Active	Active	449.15	120.01	2.00849	5.77141e-21
higher RPS in liver	13	18649746	ENSSSCG00000032220	CNOT10	5.54821	0	1.20854e-08	5.5425	4	0	1	3	0	0	0	0	Active	Active	50.35	38.38	0.500961	1.1481e-06
higher RPS in liver	13	18860730	ENSSSCG00000034660	CCR4	5.67911	0	0.000317492	5.67625	5	0	1	4	0	0	0	0	Inactive	Inactive	0.52	0.68	-0.224341	0.591845
higher RPS in liver	13	18953146	ENSSSCG00000024119	GLB1	6.1296	0	1.29553e-09	6.12375	4	0	0	4	0	0	0	0	Inactive	Inactive	38.2	33.94	0.227341	0.52043
higher RPS in liver	13	22707444	ENSSSCG00000028740	CTDSPL	22.75	13.5308	0.00144031	9.22	17	13	0	4	10	0	2	8	Active	Active	27.62	13.58	1.07235	7.69939e-09
higher RPS in liver	13	22831915	ENSSSCG00000011246	VILL	15.9566	4.95599	5.25503e-08	11.0025	11	5	0	6	4	0	0	4	Active	Active	0.96	0.4	1.6351	0.00464164
higher RPS in liver	13	22964071	ENSSSCG00000011251	MYD88	6.40767	0	0.00043575	6.4025	6	0	0	6	0	0	0	0	Active	Active	12.29	9.67	0.360475	0.0912741
higher RPS in liver	13	23893449	ENSSSCG00000047183	Unknown	20.5168	16.6974	0.000127903	3.8175	14	0	1	13	12	0	5	7	Inactive	Inactive	0.3	0.51	-0.49685	0.348013
higher RPS in liver	13	24072527	ENSSSCG00000037236	RPSA	3.54287	0	8.36142e-07	3.53625	3	0	0	3	0	0	0	0	Active	Active	2244.17	2900.84	-0.395763	0.0967715
higher RPS in liver	13	24574910	ENSSSCG00000011270	EIF1B	9.28324	1.43585	5.36079e-10	7.84875	6	3	0	3	1	0	1	0	Active	Active	124.22	41.03	1.76473	1.65093e-17
higher RPS in liver	13	26523983	ENSSSCG00000011293	POMGNT2	9.31723	0	5.98265e-08	9.31125	9	0	0	9	0	0	0	0	Inactive	Inactive	4.48	12.41	-1.37053	3.44665e-05
higher RPS in liver	13	27006539	ENSSSCG00000011296	ANO10	14.1726	0	4.38162e-08	14.1687	11	11	0	0	0	0	0	0	Active	Active	28.21	32.77	-0.169768	0.46731
higher RPS in liver	13	27006201	ENSSSCG00000011297	ABHD5	14.1726	0	4.38162e-08	14.1687	11	11	0	0	0	0	0	0	Active	Active	341.76	58.09	2.7534	3.87581e-27
higher RPS in liver	13	28406074	ENSSSCG00000030575	TMEM158	3.88131	0	2.06693e-09	3.875	3	0	0	3	0	0	0	0	Active	Active	8.01	1.77	2.05039	3.82059e-10
higher RPS in liver	13	28817141	ENSSSCG00000027176	SACM1L	10.5858	4.21935	2.23458e-06	6.36375	8	0	6	2	3	0	2	1	Active	Active	167.07	35.69	2.37196	1.53818e-26
higher RPS in liver	13	29095901	ENSSSCG00000011318	CXCR6	4.59181	0	2.50776e-07	4.585	5	0	2	3	0	0	0	0	Inactive	Inactive	2.43	0.07	5.30261	0.00288949
higher RPS in liver	13	29251959	ENSSSCG00000024311	CCR2	5.87243	1.09893	1.7276e-06	4.77375	5	0	5	0	1	0	0	1	Inactive	Inactive	6.28	1.45	2.28544	1.61226e-07
higher RPS in liver	13	29383303	ENSSSCG00000024344	CCR5	29.8927	12.1737	2.18751e-08	17.7162	22	0	9	13	9	0	2	7	Active	Inactive	8.15	2.83	1.80293	0.00131598
higher RPS in liver	13	29402539	ENSSSCG00000023557	CCRL2	11.7471	0	1.82409e-09	11.7413	10	0	3	7	0	0	0	0	Active	Active	18.11	2.84	2.72426	1.68278e-11
higher RPS in liver	13	29735586	ENSSSCG00000011325	MYL3	5.27154	1.51888	8.48042e-10	3.75	3	0	0	3	1	0	0	1	Inactive	Active	8.34	1401.12	-7.46611	7.8955e-97
higher RPS in liver	13	31053130	ENSSSCG00000011347	NME6	3.02295	0	7.85043e-05	3.0175	3	0	0	3	0	0	0	0	Active	Active	183.66	43.29	2.13356	3.25787e-23
higher RPS in liver	13	31053435	ENSSSCG00000048408	L1TD1	3.02295	0	7.85043e-05	3.0175	3	0	0	3	0	0	0	0	Active	Active	8.09	16.82	-0.873293	0.000268535
higher RPS in liver	13	31480030	ENSSSCG00000045239	Unknown	3.04577	0	1.19389e-05	3.04	3	0	0	3	0	0	0	0	Inactive	Inactive	0	0.33	-	-
higher RPS in liver	13	31904240	ENSSSCG00000036636	C3ORF62	16.5538	12.1755	2.01376e-07	4.3775	10	2	0	8	7	0	1	6	Active	Active	16.28	11.77	0.522654	0.0016199
higher RPS in liver	13	31904348	ENSSSCG00000011382	USP4	16.5538	12.1755	2.01376e-07	4.3775	10	2	0	8	7	0	1	6	Active	Active	42.19	59.11	-0.37758	0.0375297
higher RPS in liver	13	31917335	ENSSSCG00000033727	GPX1	15.8814	8.03302	4.55415e-08	7.85	10	1	1	8	5	0	1	4	Active	Active	364.14	121.46	1.33564	6.7094e-06
higher RPS in liver	13	32003722	ENSSSCG00000022080	RHOA	22.3094	10.618	1.8812e-08	11.6913	15	0	2	13	7	0	0	7	Active	Active	82.94	67.49	0.396955	0.0252669
higher RPS in liver	13	31991567	ENSSSCG00000037459	TCTA	13.6142	6.23855	4.04964e-08	7.37625	9	0	1	8	4	0	0	4	Active	Active	39.43	24.13	0.715114	0.00437435
higher RPS in liver	13	32002470	ENSSSCG00000022975	AMT	22.3094	10.618	1.8812e-08	11.6913	15	0	2	13	7	0	0	7	Active	Inactive	300.58	2.14	6.93582	4.6267e-75
higher RPS in liver	13	32007217	ENSSSCG00000031594	NICN1	25.0327	19.0731	4.64419e-06	5.96125	16	0	1	15	13	0	0	13	Active	Active	49.95	12.36	1.82623	2.64948e-18
higher RPS in liver	13	32029329	ENSSSCG00000034357	DAG1	22.6194	5.6135	2.72777e-09	17.0038	16	0	0	16	4	0	0	4	Active	Active	25.28	258.68	-3.25106	2.40099e-39
higher RPS in liver	13	32988774	ENSSSCG00000011412	CACNA2D2	20.7057	14.1126	0.000868565	6.59125	16	0	2	14	11	0	2	9	Active	Active	0.11	0.7	-3.09368	1.06636e-18
higher RPS in liver	13	33750734	ENSSSCG00000011417	DCAF1	16.144	7.10096	5.76174e-07	9.04375	12	0	0	12	5	0	0	5	Active	Active	31.39	41.27	-0.250847	0.0348406
higher RPS in liver	13	33893931	ENSSSCG00000011423	GRM2	6.68955	2.47857	1.24128e-09	4.21	5	0	0	5	2	0	1	1	Active	Active	5.3	6.26	-0.317243	0.222876
higher RPS in liver	13	34022726	ENSSSCG00000049278	IQCF3	10.3787	4.67678	9.37147e-09	5.7025	8	0	3	5	4	0	0	4	Inactive	Inactive	7.55	0.28	6.48715	6.04441e-09
higher RPS in liver	13	34029457	ENSSSCG00000025367	Unknown	11.4867	8.43703	1.83412e-05	3.04875	9	0	4	5	6	0	0	6	Inactive	Inactive	0.07	0	-	-
higher RPS in liver	13	34035821	ENSSSCG00000023824	IQCF2	9.32352	3.90305	5.07639e-07	5.41875	7	0	2	5	3	0	0	3	Inactive	Inactive	0.48	0.15	-	-
higher RPS in liver	13	34059385	ENSSSCG00000029827	IQCF1	4.69981	0	3.07527e-07	4.69375	4	0	2	2	0	0	0	0	Inactive	Inactive	0.06	0.13	-	-
higher RPS in liver	13	34088198	ENSSSCG00000048899	GPR62	12.1514	8.23596	3.14409e-07	3.91625	9	0	4	5	6	0	0	6	Active	Active	0.08	0.27	-	-
higher RPS in liver	13	34104696	ENSSSCG00000028446	PCBP4	15.836	12.348	4.16459e-05	3.48625	12	0	5	7	9	0	0	9	Active	Active	47.24	68.96	-0.663163	0.00948241
higher RPS in liver	13	34104363	ENSSSCG00000023325	ACY1	15.836	12.348	4.16459e-05	3.48625	12	0	5	7	9	0	0	9	Active	Active	1043.99	327.79	1.59956	4.5187e-07
higher RPS in liver	13	34104425	ENSSSCG00000030229	ABHD14A	15.836	12.348	4.16459e-05	3.48625	12	0	5	7	9	0	0	9	Active	Active	18.13	32.69	-0.82971	0.00185467
higher RPS in liver	13	34371842	ENSSSCG00000011435	TWF2	5.42253	0	1.6115e-09	5.4175	4	0	0	4	0	0	0	0	Inactive	Inactive	48.62	478.2	-3.25792	7.7346e-32
higher RPS in liver	13	34892339	ENSSSCG00000011450	ITIH1	9.45525	2.34133	1.63726e-07	7.115	6	0	2	4	2	0	2	0	Active	Active	1824.75	1.05	10.572	1.46249e-61
higher RPS in liver	13	34892369	ENSSSCG00000011451	ITIH3	9.45525	2.34133	1.63726e-07	7.115	6	0	2	4	2	0	2	0	Active	Active	1465.76	2.81	9.102	4.40218e-98
higher RPS in liver	13	34993119	ENSSSCG00000041313	Unknown	15.5197	11.7064	4.23219e-06	3.81375	11	0	2	9	8	0	1	7	Inactive	Inactive	2.97	3.41	-0.00282488	0.992927
higher RPS in liver	13	35180041	ENSSSCG00000011454	SFMBT1	25.3004	15.836	3.29868e-07	9.46375	19	0	6	13	12	0	0	12	Active	Active	18.56	7.98	1.40976	3.62129e-09
higher RPS in liver	13	35377580	ENSSSCG00000021408	TKT	3.27797	0	1.2346e-08	3.27375	2	0	2	0	0	0	0	0	Active	Active	206.71	63.82	1.65988	5.53989e-21
higher RPS in liver	13	39789703	ENSSSCG00000011471	FLNB	19.8898	1.48195	1.20573e-10	18.4075	14	13	0	1	1	0	0	1	Active	Active	55.17	27.97	1.13077	2.07238e-06
higher RPS in liver	13	40062185	ENSSSCG00000035452	HTD2	14.5596	5.58508	2.28969e-07	8.975	11	3	5	3	4	0	3	1	Active	Active	75.69	50.02	0.701362	0.000377764
higher RPS in liver	13	40062404	ENSSSCG00000011474	PXK	14.5596	5.58508	2.28969e-07	8.975	11	3	5	3	4	0	3	1	Active	Active	33.09	40.16	-0.200989	0.221862
higher RPS in liver	13	40768664	ENSSSCG00000011482	CFAP20DC	5.24213	0	5.58686e-10	5.2375	4	0	1	3	0	0	0	0	Active	Active	14.04	7.25	1.03018	5.10752e-05
higher RPS in liver	13	45323306	ENSSSCG00000011490	C3ORF49	12.9572	9.9223	2.16853e-05	3.03875	8	0	0	8	6	0	0	6	Inactive	Inactive	0.18	0	-	-
higher RPS in liver	13	47567518	ENSSSCG00000011497	MAGI1	17.5451	0	5.83106e-11	17.5388	13	0	6	7	0	0	0	0	Active	Active	16.22	7.51	1.36163	9.99413e-08
higher RPS in liver	13	49090468	ENSSSCG00000011501	SUCLG2	3.83476	0	1.91593e-09	3.83	3	0	3	0	0	0	0	0	Active	Active	837.92	236.22	1.73871	3.35036e-14
higher RPS in liver	13	53152319	ENSSSCG00000011516	EIF4E3	5.25997	0	0.000350942	5.25375	5	0	1	4	0	0	0	0	Active	Active	46.12	38.02	0.298511	0.157556
higher RPS in liver	13	53152062	ENSSSCG00000036580	GPR27	5.25997	0	0.000350942	5.25375	5	0	1	4	0	0	0	0	Active	Active	19.78	11.54	0.692711	0.0525317
higher RPS in liver	13	54385581	ENSSSCG00000041059	Unknown	18.3263	15.2075	7.44136e-05	3.12	14	0	0	14	11	1	0	10	Inactive	Inactive	0.99	3.13	-1.49493	3.40902e-08
higher RPS in liver	13	61068126	ENSSSCG00000023437	ITPR1	6.34248	0	9.54643e-09	6.33875	5	3	0	2	0	0	0	0	Active	Active	58.9	31.43	1.04642	1.50387e-06
higher RPS in liver	13	66350606	ENSSSCG00000011570	IRAK2	4.59843	1.50947	1.46913e-05	3.09125	3	0	2	1	1	0	1	0	Active	Active	7.74	7.39	0.116274	0.697682
higher RPS in liver	13	66897128	ENSSSCG00000023084	ATP2B2	7.59519	0	1.89925e-08	7.59125	6	0	2	4	0	0	0	0	Active	Inactive	26.16	8.27	1.78965	2.123e-08
higher RPS in liver	13	68908578	ENSSSCG00000011590	RHO	4.87162	0	2.45271e-06	4.86625	4	0	0	4	0	0	0	0	Inactive	Inactive	0.06	0.13	-	-
higher RPS in liver	13	69895217	ENSSSCG00000040594	C3ORF20	24.8035	19.9431	1.79443e-05	4.8625	17	0	4	13	14	0	9	5	Inactive	Inactive	0.27	0.27	-	-
higher RPS in liver	13	69915655	ENSSSCG00000040702	CCDC174	5.18755	0	4.26307e-09	5.1825	4	0	0	4	0	0	0	0	Inactive	Inactive	14.24	13.97	0.163905	0.380957
higher RPS in liver	13	71560012	ENSSSCG00000031176	GP9	14.5987	8.28989	1.46517e-06	6.31	11	0	1	10	6	0	0	6	Active	Active	2.29	1.79	0.389094	0.403656
higher RPS in liver	13	71672733	ENSSSCG00000011616	COPG1	7.90522	3.07998	1.33415e-06	4.82375	5	0	0	5	2	0	0	2	Active	Active	122.04	205.86	-0.586643	0.0148407
higher RPS in liver	13	71732277	ENSSSCG00000011611	HMCES	8.405	2.59663	2.19432e-06	5.81	7	0	0	7	2	0	0	2	Active	Active	84.87	87.51	-0.0374154	0.871539
higher RPS in liver	13	74180197	ENSSSCG00000011635	TMEM108	23.352	4.3409	2.667e-08	19.01	18	0	3	15	3	0	3	0	Active	Active	0.16	0.06	-	-
higher RPS in liver	13	74846793	ENSSSCG00000021966	TOPBP1	4.62222	0	4.73701e-10	4.615	3	0	0	3	0	0	0	0	Active	Active	94.64	53.35	0.880466	1.7343e-05
higher RPS in liver	13	74862542	ENSSSCG00000028203	Unknown	8.56903	0	9.0421e-10	8.56375	6	0	1	5	0	0	0	0	Active	Active	1113.87	0.96	10.1058	1.35456e-171
higher RPS in liver	13	74930655	ENSSSCG00000011640	TF	16.1925	0	2.52242e-09	16.1875	11	0	4	7	0	0	0	0	Active	Inactive	73295.6	9.69	12.7427	1.35584e-182
higher RPS in liver	13	77217428	ENSSSCG00000011653	PCCB	6.62015	1.34987	1.34249e-07	5.2725	5	0	2	3	1	0	0	1	Active	Active	245.58	109.28	1.14373	1.87755e-09
higher RPS in liver	13	83308007	ENSSSCG00000011680	PLS1	12.1498	0	2.43492e-11	12.145	9	5	1	3	0	0	0	0	Active	Active	253.78	2.1	7.01034	1.42856e-154
higher RPS in liver	13	84634030	ENSSSCG00000036206	DIPK2A	5.93521	0	0.000540058	5.9325	6	0	4	2	0	0	0	0	Active	Active	41.36	20.61	1.23651	0.000137227
higher RPS in liver	13	85848449	ENSSSCG00000044740	Unknown	6.07404	0.874629	0.000501947	5.20125	6	0	2	4	1	0	0	1	Inactive	Inactive	0.26	0.54	-0.734061	0.0771172
higher RPS in liver	13	88934868	ENSSSCG00000011695	AGTR1	9.50342	0	7.09241e-06	9.49875	9	6	1	2	0	0	0	0	Active	Active	100.35	35.24	1.51908	7.4521e-07
higher RPS in liver	13	89360874	ENSSSCG00000011699	HPS3	5.55238	1.39984	8.95013e-09	4.15	4	0	3	1	1	0	0	1	Active	Active	42.21	9.82	1.9819	1.44074e-09
higher RPS in liver	13	89513351	ENSSSCG00000025468	Unknown	29.4605	10.125	1.06943e-10	19.3337	20	0	6	14	7	0	3	4	Inactive	Inactive	0.54	0.05	5.06209	5.43799e-07
higher RPS in liver	13	89549447	ENSSSCG00000011701	TM4SF18	3.74803	0	2.72845e-09	3.7425	3	0	0	3	0	0	0	0	Active	Active	55.01	12.4	2.19075	6.11112e-07
higher RPS in liver	13	89600027	ENSSSCG00000033018	TM4SF1	10.8968	2.57914	1.17535e-07	8.315	8	4	0	4	2	0	1	1	Active	Active	143.7	98.81	0.731571	0.0361518
higher RPS in liver	13	90183742	ENSSSCG00000030260	PFN2	37.3572	30.6369	4.44016e-07	6.72	26	0	12	14	20	10	5	5	Active	Active	324.55	201.07	0.765752	0.00389421
higher RPS in liver	13	95724156	ENSSSCG00000025316	SLC33A1	4.08447	0	9.09608e-10	4.07875	3	0	0	3	0	0	0	0	Active	Active	150.29	49.71	1.55764	5.92137e-11
higher RPS in liver	13	96651960	ENSSSCG00000026579	LEKR1	16.0392	3.8864	1.32914e-09	12.1538	12	0	3	9	3	0	0	3	Active	Active	2.71	0.99	1.59587	0.000637985
higher RPS in liver	13	98586030	ENSSSCG00000028623	RARRES1	12.5369	1.36757	3.317e-07	11.1713	10	0	2	8	1	0	0	1	Inactive	Inactive	51.21	5.84	3.021	2.90807e-18
higher RPS in liver	13	98629261	ENSSSCG00000022054	Unknown	5.4493	0	7.14442e-10	5.44375	4	0	0	4	0	0	0	0	Inactive	Inactive	0.08	0	-	-
higher RPS in liver	13	99067915	ENSSSCG00000011729	SCHIP1	3.28636	0	1.75832e-06	3.28	3	0	0	3	0	0	0	0	Inactive	Inactive	12.23	238.43	-4.04661	4.30734e-64
higher RPS in liver	13	109623787	ENSSSCG00000020927	SLC2A2	11.6511	0	2.19012e-09	11.6463	8	8	0	0	0	0	0	0	Active	Inactive	1320.58	0.68	10.9416	0
higher RPS in liver	13	110414319	ENSSSCG00000011751	TMEM212	31.9916	0	1.12779e-11	31.9875	22	17	0	5	0	0	0	0	Inactive	Inactive	1	1.74	-0.629376	0.0653492
higher RPS in liver	13	111107423	ENSSSCG00000020906	GHSR	3.97464	0	2.22771e-07	3.97	3	1	0	2	0	0	0	0	Inactive	Inactive	240.63	39.69	2.68361	1.74963e-08
higher RPS in liver	13	115488176	ENSSSCG00000011760	TBL1XR1	23.6056	18.6233	4.59062e-06	4.98	17	0	5	12	12	5	0	7	Active	Active	114.87	117.5	0.0610069	0.735848
higher RPS in liver	13	121817150	ENSSSCG00000051373	Unknown	5.07247	1.25699	5.78082e-08	3.81625	4	0	0	4	1	0	0	1	Inactive	Inactive	1.47	1.73	-0.0699607	0.857627
higher RPS in liver	13	122043195	ENSSSCG00000042409	Unknown	12.538	5.48147	4.91248e-06	7.05375	10	0	2	8	4	0	0	4	Inactive	Inactive	1.49	2.32	-0.585111	0.0240033
higher RPS in liver	13	122060360	ENSSSCG00000011782	ABCC5	24.9361	18.7155	1.03753e-06	6.22	16	0	2	14	12	0	0	12	Active	Active	11.09	27.15	-1.13457	2.52787e-09
higher RPS in liver	13	122060484	ENSSSCG00000011783	EIF2B5	24.9361	18.7155	1.03753e-06	6.22	16	0	2	14	12	0	0	12	Active	Active	64.9	73.23	-0.127338	0.396503
higher RPS in liver	13	122076003	ENSSSCG00000025374	DVL3	24.4832	16.4864	1.50601e-08	7.9975	16	0	2	14	11	0	0	11	Active	Active	11.02	20.6	-0.809541	0.000737002
higher RPS in liver	13	122089938	ENSSSCG00000024437	AP2M1	17.3581	9.52728	3.40911e-10	7.8325	12	0	2	10	7	0	0	7	Inactive	Active	389.87	276.47	0.525657	0.0315182
higher RPS in liver	13	122098542	ENSSSCG00000028856	ABCF3	14.4923	8.54124	2.23717e-06	5.95	10	0	2	8	7	0	0	7	Active	Active	54.44	118.93	-1.11586	2.68984e-06
higher RPS in liver	13	122203511	ENSSSCG00000030255	EIF4G1	13.131	6.51411	3.4853e-07	6.61625	9	0	1	8	5	0	0	5	Active	Active	170.68	299.09	-0.763666	0.00223729
higher RPS in liver	13	122224939	ENSSSCG00000028372	FAM131A	11.8025	1.26273	8.53542e-10	10.5388	9	0	2	7	1	0	0	1	Active	Active	1.55	4.19	-1.34947	7.87316e-11
higher RPS in liver	13	122249867	ENSSSCG00000021581	CLCN2	22.4056	14.8992	3.44984e-06	7.505	17	0	0	17	11	0	3	8	Active	Active	1.6	2.36	-0.459322	0.144785
higher RPS in liver	13	122249909	ENSSSCG00000022507	POLR2H	22.4056	14.8992	3.44984e-06	7.505	17	0	0	17	11	0	3	8	Active	Active	38.38	40.17	0.0807552	0.718692
higher RPS in liver	13	122267861	ENSSSCG00000023909	THPO	9.52906	2.59262	1.67134e-07	6.935	8	0	0	8	2	0	0	2	Active	Active	5.26	1.98	1.40818	3.01131e-05
higher RPS in liver	13	122266615	ENSSSCG00000025270	CHRD	9.52906	2.59262	1.67134e-07	6.935	8	0	0	8	2	0	0	2	Active	Active	47.44	5.13	3.15018	1.72625e-20
higher RPS in liver	13	123806282	ENSSSCG00000039758	Unknown	24.1859	18.9977	2.11021e-07	5.1875	16	0	0	16	13	0	4	9	Inactive	Inactive	77.4	1.27	6.27141	1.80275e-27
higher RPS in liver	13	124390539	ENSSSCG00000011797	TBCCD1	12.6016	0	8.36773e-10	12.595	10	0	4	6	0	0	0	0	Active	Active	21.83	22.38	0.0720508	0.658216
higher RPS in liver	13	124390970	ENSSSCG00000011798	AC068631.2	12.6016	0	8.36773e-10	12.595	10	0	4	6	0	0	0	0	Active	Active	108.6	23.9	2.41646	4.23964e-13
higher RPS in liver	13	124505303	ENSSSCG00000011801	HRG	7.29203	0	4.39194e-08	7.2875	5	0	0	5	0	0	0	0	Inactive	Inactive	903.21	0.35	11.4176	5.07243e-31
higher RPS in liver	13	124521277	ENSSSCG00000011802	KNG1	7.49614	0	1.36222e-09	7.49125	5	0	0	5	0	0	0	0	Active	Inactive	3205.37	0.19	14.0831	1.93471e-64
higher RPS in liver	13	124604426	ENSSSCG00000011804	RFC4	14.6457	0	1.23318e-10	14.6412	11	0	0	11	0	0	0	0	Active	Active	83.99	22.02	1.9872	1.78928e-19
higher RPS in liver	13	124633684	ENSSSCG00000039103	ADIPOQ	49.5363	2.67864	1.24749e-13	46.8575	35	0	11	24	2	0	0	2	Inactive	Inactive	1.05	65.68	-6.097	2.59734e-43
higher RPS in liver	13	124700133	ENSSSCG00000025770	ST6GAL1	17.0241	0	3.51144e-12	17.0188	12	0	8	4	0	0	0	0	Active	Active	646.01	5.2	6.92067	1.03995e-155
higher RPS in liver	13	125054463	ENSSSCG00000011806	MASP1	36.6894	14.6806	8.07965e-11	22.0075	24	0	2	22	10	0	2	8	Inactive	Inactive	58.76	20.07	1.54189	4.99083e-07
higher RPS in liver	13	127808599	ENSSSCG00000024788	CLDN16	5.30435	1.42174	4.03679e-09	3.88	4	0	3	1	1	0	0	1	Inactive	Inactive	0.1	0	-	-
higher RPS in liver	13	129997215	ENSSSCG00000011819	MB21D2	13.2055	6.21639	2.37477e-07	6.98875	10	0	3	7	5	0	4	1	Active	Active	45.88	10.65	2.17828	3.19138e-30
higher RPS in liver	13	130093805	ENSSSCG00000041365	Unknown	14.2236	10.225	6.28188e-08	3.9975	10	0	2	8	7	0	5	2	Inactive	Inactive	0.87	1.98	-0.963865	0.00801309
higher RPS in liver	13	132431442	ENSSSCG00000031147	ACAP2	4.76049	1.35979	5.82418e-06	3.3975	4	0	0	4	1	0	0	1	Active	Active	102.63	35.32	1.65905	1.79658e-10
higher RPS in liver	13	133970594	ENSSSCG00000011848	TFRC	14.0281	8.38305	2.0208e-06	5.64375	9	4	0	5	6	0	0	6	Active	Active	415.52	1008.87	-1.64041	0.000745331
higher RPS in liver	13	135414955	ENSSSCG00000011862	MUC13	8.00686	2.69554	2.64805e-09	5.31125	5	0	3	2	2	0	2	0	Inactive	Inactive	3.57	0.03	8.20736	1.32214e-12
higher RPS in liver	13	135584975	ENSSSCG00000038756	Unknown	28.3711	20.8986	1.15998e-06	7.47125	19	9	0	10	13	0	6	7	Inactive	Inactive	0.18	0	-	-
higher RPS in liver	13	135784880	ENSSSCG00000030362	KALRN	12.0144	1.32393	0.000552479	10.6925	10	0	2	8	1	0	1	0	Active	Active	21.71	19.42	0.0338361	0.917436
higher RPS in liver	13	137865383	ENSSSCG00000011874	PARP14	6.78961	0	3.35179e-07	6.78375	5	0	0	5	0	0	0	0	Active	Active	37.81	17.56	1.39186	0.0884145
higher RPS in liver	13	137961343	ENSSSCG00000011876	DTX3L	9.15127	0	4.7227e-08	9.145	7	0	0	7	0	0	0	0	Active	Active	35.53	18.7	1.07313	0.064329
higher RPS in liver	13	137961357	ENSSSCG00000027709	PARP9	9.15127	0	4.7227e-08	9.145	7	0	0	7	0	0	0	0	Active	Active	30.06	8.31	2.02267	0.000926452
higher RPS in liver	13	137970489	ENSSSCG00000028475	KPNA1	4.44771	0	4.45364e-06	4.4425	4	0	0	4	0	0	0	0	Inactive	Inactive	46.95	81.12	-0.774771	4.06771e-05
higher RPS in liver	13	138240965	ENSSSCG00000037882	Unknown	6.98763	1.32255	9.66426e-08	5.66375	5	0	2	3	1	0	0	1	Inactive	Inactive	0.08	0	-	-
higher RPS in liver	13	138978463	ENSSSCG00000036613	POLQ	14.8351	9.63156	4.15294e-08	5.20375	11	0	0	11	7	0	0	7	Active	Active	18.66	4.12	2.19686	2.98426e-05
higher RPS in liver	13	140136158	ENSSSCG00000011889	GSK3B	14.7197	10.2525	2.74982e-06	4.46375	11	0	6	5	7	0	5	2	Active	Active	60.89	105.16	-0.728345	1.37568e-05
higher RPS in liver	13	142949107	ENSSSCG00000043034	Unknown	3.81842	0	2.79065e-09	3.815	3	0	0	3	0	0	0	0	Inactive	Inactive	0.17	0.27	-	-
higher RPS in liver	13	146105696	ENSSSCG00000011915	GRAMD1C	9.21019	0	1.46437e-10	9.205	7	0	1	6	0	0	0	0	Active	Active	215.82	2.62	6.42702	7.08184e-94
higher RPS in liver	13	146421223	ENSSSCG00000024663	SPICE1	19.3144	10.1058	2.58629e-09	9.2075	14	0	2	12	7	0	0	7	Inactive	Inactive	11.76	12.75	0.170146	0.536636
higher RPS in liver	13	146953149	ENSSSCG00000011925	CD200R1	37.8829	17.23	1.75125e-11	20.6513	26	0	5	21	12	0	4	8	Inactive	Inactive	20.78	9.26	1.13349	0.00457047
higher RPS in liver	13	147179591	ENSSSCG00000011928	CCDC80	6.1052	1.23139	2.72558e-08	4.87125	5	0	1	4	1	0	0	1	Inactive	Inactive	16.97	62.03	-1.74279	8.21411e-06
higher RPS in liver	13	147522836	ENSSSCG00000027820	CD200	8.02639	0	6.76185e-09	8.02125	6	0	0	6	0	0	0	0	Inactive	Inactive	20.49	16.06	0.533615	0.0272618
higher RPS in liver	13	147508739	ENSSSCG00000034515	Unknown	19.7518	5.63887	1.70852e-12	14.1125	13	0	4	9	4	0	0	4	Inactive	Inactive	7.19	0.11	6.78303	0.00136622
higher RPS in liver	13	147517663	ENSSSCG00000023918	SLC9C1	11.1855	0	6.32481e-10	11.18	8	0	2	6	0	0	0	0	Inactive	Inactive	0.25	0.45	-	-
higher RPS in liver	13	148579160	ENSSSCG00000011933	NECTIN3	9.31985	0	1.86072e-08	9.31625	7	5	2	0	0	0	0	0	Active	Active	223.65	33.06	2.74222	1.06689e-29
higher RPS in liver	13	148577909	ENSSSCG00000030335	Unknown	9.31985	0	1.86072e-08	9.31625	7	5	2	0	0	0	0	0	Active	Active	0.22	0.01	-	-
higher RPS in liver	13	150272887	ENSSSCG00000040999	Unknown	11.867	0	3.55773e-10	11.8625	9	0	0	9	0	0	0	0	Inactive	Inactive	0.44	0.46	-	-
higher RPS in liver	13	153998208	ENSSSCG00000011946	ALCAM	8.47669	0	6.55784e-10	8.47	6	0	2	4	0	0	0	0	Active	Active	316.47	15.97	4.39043	5.67034e-60
higher RPS in liver	13	157294478	ENSSSCG00000011951	NFKBIZ	10.9784	0	6.8436e-08	10.9738	8	0	2	6	0	0	0	0	Active	Active	35.11	11.74	1.62437	5.86639e-17
higher RPS in liver	13	159192107	ENSSSCG00000011970	CMSS1	7.42673	2.72338	3.18507e-06	4.705	6	0	0	6	2	0	1	1	Active	Active	43.71	20.23	1.03472	9.40786e-07
higher RPS in liver	13	159374504	ENSSSCG00000011973	COL8A1	5.76232	0	1.11721e-07	5.75875	5	0	3	2	0	0	0	0	Active	Active	8.24	10.71	0.0367026	0.937284
higher RPS in liver	13	161702878	ENSSSCG00000050412	OR5H8	8.3236	5.04366	0.00158004	3.27875	7	0	0	7	4	0	0	4	Inactive	Inactive	0.05	0.05	-	-
higher RPS in liver	13	162038743	ENSSSCG00000036422	OR5K3	25.5937	17.0067	0.0309618	8.5875	32	0	0	32	18	0	0	18	Inactive	Inactive	0	0	-	-
higher RPS in liver	13	173634454	ENSSSCG00000012000	GBE1	13.2981	0	1.66835e-09	13.295	10	10	0	0	0	0	0	0	Active	Active	680.14	113.46	2.6033	4.89282e-38
higher RPS in liver	13	179915177	ENSSSCG00000021038	NRIP1	8.62199	1.48013	1.28634e-09	7.14	8	4	1	3	1	0	0	1	Active	Active	73.06	83.37	0.0802499	0.769003
higher RPS in liver	13	182409472	ENSSSCG00000033025	C21ORF91	3.48872	0	1.63681e-06	3.485	3	0	1	2	0	0	0	0	Active	Active	201.51	53.36	2.04055	5.6495e-10
higher RPS in liver	13	182409183	ENSSSCG00000012018	CHODL	3.48872	0	1.63681e-06	3.485	3	0	1	2	0	0	0	0	Active	Active	2.45	44.76	-3.95275	4.05734e-56
higher RPS in liver	13	190286205	ENSSSCG00000012026	ADAMTS1	29.326	20.8753	1.02885e-05	8.45	20	0	3	17	14	0	1	13	Active	Active	34.98	43.45	-0.114258	0.642129
higher RPS in liver	13	199617318	ENSSSCG00000031111	CBR1	4.2892	1.01408	0.0174629	3.27375	5	0	0	5	1	0	0	1	Inactive	Inactive	0.53	0.18	1.8098	0.183124
higher RPS in liver	13	200926108	ENSSSCG00000012063	VPS26C	8.86421	5.76788	0.000363646	3.095	7	3	1	3	4	0	1	3	Active	Active	17.9	23.42	-0.371368	0.0293076
higher RPS in liver	13	203412479	ENSSSCG00000037110	PCP4	19.1171	0	3.89971e-12	19.1125	13	0	0	13	0	0	0	0	Inactive	Inactive	2.45	0.75	2.53602	0.000130917
higher RPS in liver	13	205153007	ENSSSCG00000012083	RIPK4	15.9882	10.1051	1.19963e-07	5.8825	11	0	2	9	7	0	3	4	Active	Active	2.56	0.09	5.20591	8.69669e-30
higher RPS in liver	13	205644334	ENSSSCG00000022857	Unknown	9.09082	2.75411	9.70816e-08	6.335	6	0	0	6	2	0	2	0	Inactive	Inactive	3.08	0.18	5.40117	0.0135608
higher RPS in liver	13	205938334	ENSSSCG00000030016	PDE9A	12.5237	4.0641	0.00172869	8.46	11	1	0	10	3	0	1	2	Active	Active	10.87	3.39	1.6653	7.32979e-15
higher RPS in liver	6	160884	ENSSSCG00000002640	DEF8	14.1435	4.31142	1.24253e-10	9.83	10	0	2	8	3	0	0	3	Active	Active	25.92	19.86	0.311709	0.218361
higher RPS in liver	6	178462	ENSSSCG00000002639	TUBB3	14.2297	6.6084	3.91864e-06	7.6225	11	0	2	9	5	0	0	5	Active	Active	0.54	0.45	-1.54862	0.0196026
higher RPS in liver	6	182187	ENSSSCG00000020924	MC1R	15.6562	0	1.01746e-09	15.6525	12	0	4	8	0	0	0	0	Inactive	Active	0.09	0.09	-	-
higher RPS in liver	6	313366	ENSSSCG00000029228	ZNF276	4.91272	0	7.17526e-08	4.9075	4	0	0	4	0	0	0	0	Active	Active	14.1	13.05	0.0826719	0.747188
higher RPS in liver	6	313782	ENSSSCG00000022310	VPS9D1	4.91272	0	7.17526e-08	4.9075	4	0	0	4	0	0	0	0	Active	Active	9.6	17.49	-0.833235	0.0042115
higher RPS in liver	6	326746	ENSSSCG00000029339	SPATA2L	6.84175	0	1.90508e-08	6.8375	5	0	0	5	0	0	0	0	Active	Active	2.53	3.97	-0.665517	0.0999586
higher RPS in liver	6	339142	ENSSSCG00000025401	CDK10	5.08689	0.907897	0.000108157	4.1775	5	0	0	5	1	0	0	1	Active	Active	49.16	71.11	-0.530705	0.0230086
higher RPS in liver	6	351922	ENSSSCG00000023677	CHMP1A	5.20884	0	1.51089e-06	5.20375	4	0	0	4	0	0	0	0	Active	Active	52.4	36.33	0.468738	0.109855
higher RPS in liver	6	394344	ENSSSCG00000051285	Unknown	7.20924	3.06465	8.817e-05	4.145	6	0	0	6	2	0	0	2	Inactive	Active	0.21	0.08	-	-
higher RPS in liver	6	439212	ENSSSCG00000024756	SPG7	8.25597	3.08553	6.04377e-08	5.16875	6	0	1	5	2	0	0	2	Active	Active	43.87	71.29	-0.826566	0.000439351
higher RPS in liver	6	582829	ENSSSCG00000047840	Unknown	5.11884	1.44452	1.8256e-06	3.675	4	0	0	4	1	0	0	1	Inactive	Active	0.8	0.85	-0.0109456	0.975412
higher RPS in liver	6	988990	ENSSSCG00000040145	SNAI3	3.17817	0	0.00147455	3.17375	4	0	1	3	0	0	0	0	Active	Active	0.09	4.67	-5.6376	7.31056e-14
higher RPS in liver	6	1081538	ENSSSCG00000035967	ZC3H18	4.08332	0	2.99607e-07	4.0775	3	0	0	3	0	0	0	0	Active	Active	12.14	16.82	-0.498052	0.0489999
higher RPS in liver	6	1108717	ENSSSCG00000040875	ZFPM1	6.60004	0	1.42866e-09	6.59625	4	0	0	4	0	0	0	0	Active	Active	7.31	1.52	2.07812	2.02017e-18
higher RPS in liver	6	2597659	ENSSSCG00000038460	FOXF1	25.0757	7.07891	1.7346e-09	17.9962	20	0	9	11	5	0	1	4	Active	Active	2.39	0.87	1.42792	1.61105e-05
higher RPS in liver	6	3137549	ENSSSCG00000034980	IRF8	10.0088	5.9663	2.98378e-06	4.04375	7	0	1	6	4	0	3	1	Active	Active	22.53	12.53	0.874286	0.00239528
higher RPS in liver	6	3136311	ENSSSCG00000045808	EMC8	10.0088	5.9663	2.98378e-06	4.04375	7	0	1	6	4	0	3	1	Active	Active	35.29	93.81	-1.29646	4.25055e-06
higher RPS in liver	6	3137676	ENSSSCG00000029403	Unknown	10.0088	5.9663	2.98378e-06	4.04375	7	0	1	6	4	0	3	1	Active	Active	0.54	3.3	-2.30478	0.160583
higher RPS in liver	6	4080160	ENSSSCG00000038285	KLHL36	8.45703	2.5637	6.39246e-08	5.89625	6	0	2	4	2	0	1	1	Active	Active	17.12	11.18	0.589605	0.00804461
higher RPS in liver	6	4503573	ENSSSCG00000002682	MBTPS1	5.24878	0	1.27343e-09	5.24375	4	0	0	4	0	0	0	0	Active	Active	86.04	79.32	0.118539	0.479513
higher RPS in liver	6	4675813	ENSSSCG00000032115	OSGIN1	9.98312	5.04352	5.31124e-05	4.9425	8	0	1	7	4	0	0	4	Inactive	Active	40.14	15.8	1.27762	3.29594e-06
higher RPS in liver	6	6360707	ENSSSCG00000038221	HSD17B2	6.52644	1.03284	9.26236e-08	5.49375	5	1	0	4	1	0	1	0	Active	Inactive	437.02	0.16	11.5397	3.21001e-19
higher RPS in liver	6	6387363	ENSSSCG00000035182	SDR42E1	7.14829	0	2.74962e-08	7.145	5	1	0	4	0	0	0	0	Active	Active	21.42	3.74	2.5399	4.49152e-23
higher RPS in liver	6	6881662	ENSSSCG00000002689	CMIP	40.1776	19.0032	4.70186e-09	21.1737	28	0	3	25	14	0	1	13	Active	Active	16.47	9.63	0.841496	0.00136677
higher RPS in liver	6	10173980	ENSSSCG00000002697	NUDT7	11.4261	1.08819	1.54859e-09	10.3362	9	0	1	8	1	0	0	1	Active	Active	148.87	74.54	1.0141	7.11547e-05
higher RPS in liver	6	10173263	ENSSSCG00000038627	ADAMTS18	11.4261	1.08819	1.54859e-09	10.3362	9	0	1	8	1	0	0	1	Active	Active	1.74	3.6	-1.10712	0.000156885
higher RPS in liver	6	10196455	ENSSSCG00000049761	Unknown	12.3506	4.31777	2.44397e-06	8.035	11	0	1	10	5	0	0	5	Inactive	Inactive	0.14	0.92	-2.68191	7.75681e-06
higher RPS in liver	6	11589630	ENSSSCG00000023125	AC106741.1	3.29284	0	0.000653862	3.2875	3	0	0	3	0	0	0	0	Inactive	Inactive	0.68	0.14	2.48282	4.1846e-08
higher RPS in liver	6	12223376	ENSSSCG00000047099	Unknown	3.51589	0	1.68717e-05	3.5125	3	0	0	3	0	0	0	0	Active	Active	1.9	1.53	0.0300744	0.930292
higher RPS in liver	6	12223747	ENSSSCG00000033842	CFDP1	3.51589	0	1.68717e-05	3.5125	3	0	0	3	0	0	0	0	Active	Active	182.17	111.75	0.790157	1.30637e-05
higher RPS in liver	6	12924894	ENSSSCG00000002716	MLKL	15.9782	10.6544	2.57584e-05	5.32625	12	0	3	9	7	0	3	4	Active	Active	13.81	12.32	0.269983	0.206648
higher RPS in liver	6	12952350	ENSSSCG00000002715	RFWD3	7.93387	1.42644	6.00796e-10	6.505	6	0	0	6	1	0	0	1	Active	Active	22.67	8.98	1.29748	2.14042e-06
higher RPS in liver	6	14616481	ENSSSCG00000002734	MARVELD3	3.98865	0.418719	5.25767e-06	3.565	3	0	0	3	1	0	0	1	Active	Active	7.89	0.06	7.69195	3.87422e-17
higher RPS in liver	6	14942933	ENSSSCG00000002746	DHODH	7.43037	4.38385	4.21225e-08	3.04875	5	0	3	2	3	0	2	1	Active	Active	39.96	34.9	0.283095	0.370752
higher RPS in liver	6	14985192	ENSSSCG00000050689	Unknown	6.69152	0	5.30399e-08	6.68625	5	0	1	4	0	0	0	0	Active	Inactive	2084.24	3.82	9.30452	NA
higher RPS in liver	6	14998263	ENSSSCG00000025218	TXNL4B	22.3181	10.7749	3.84012e-09	11.5437	15	0	2	13	7	0	2	5	Active	Active	39.09	32.76	0.446628	0.00352824
higher RPS in liver	6	14998292	ENSSSCG00000002748	DHX38	22.3181	10.7749	3.84012e-09	11.5437	15	0	2	13	7	0	2	5	Active	Active	14.21	17.53	-0.21237	0.197311
higher RPS in liver	6	16023169	ENSSSCG00000002752	ZFHX3	14.8929	0	7.35779e-09	14.8887	11	0	1	10	0	0	0	0	Inactive	Inactive	3.5	8.96	-1.18275	0.000603
higher RPS in liver	6	17227926	ENSSSCG00000022609	WWP2	6.83458	0.802948	5.67577e-06	6.02875	5	0	0	5	1	0	0	1	Active	Active	43.72	10.86	1.80983	1.39234e-12
higher RPS in liver	6	17774512	ENSSSCG00000028109	SNTB2	11.51	8.09755	1.93387e-07	3.415	8	0	1	7	5	0	5	0	Active	Active	16.88	35.08	-0.895977	7.74418e-06
higher RPS in liver	6	17818162	ENSSSCG00000028638	UTP4	11.0607	4.39353	1.92094e-09	6.66625	8	0	0	8	3	0	2	1	Active	Active	34.16	61.51	-0.725654	0.00369876
higher RPS in liver	6	17818198	ENSSSCG00000034165	DERPC	11.0607	4.39353	1.92094e-09	6.66625	8	0	0	8	3	0	2	1	Active	Active	68.05	38.03	0.836239	9.10198e-05
higher RPS in liver	6	17818480	ENSSSCG00000048110	Unknown	11.0607	4.39353	1.92094e-09	6.66625	8	0	0	8	3	0	2	1	Active	Active	4.72	5.27	0.0161456	0.967183
higher RPS in liver	6	17853011	ENSSSCG00000049263	HAS3	15.2261	5.00453	4.11051e-08	10.2212	11	0	0	11	4	0	3	1	Inactive	Active	0	0	-	-
higher RPS in liver	6	18155986	ENSSSCG00000025652	CDH1	3.17901	0	3.54093e-09	3.17375	2	0	0	2	0	0	0	0	Active	Active	165.46	2.42	6.1004	1.15162e-107
higher RPS in liver	6	18575524	ENSSSCG00000025417	BBS2	13.2847	9.23008	3.24122e-07	4.0525	8	0	1	7	6	0	2	4	Active	Active	34.8	26.98	0.374514	0.349398
higher RPS in liver	6	18610593	ENSSSCG00000031359	MT4	6.63234	2.31452	3.8127e-05	4.31875	5	0	1	4	2	0	0	2	Inactive	Inactive	0.08	0.56	-3.36656	0.00438011
higher RPS in liver	6	18634721	ENSSSCG00000024305	MT3	10.2489	2.66908	4.48247e-07	7.5775	7	0	1	6	2	0	0	2	Active	Active	165.53	49.86	2.07192	0.0118578
higher RPS in liver	6	18645059	ENSSSCG00000030300	MT1X	4.83694	0	3.69128e-05	4.83125	3	0	0	3	0	0	0	0	Active	Active	2607.2	18.31	7.29192	9.96786e-47
higher RPS in liver	6	19046795	ENSSSCG00000021519	CPNE2	13.3334	8.91362	6.51906e-05	4.42125	9	0	1	8	6	0	3	3	Active	Active	4.47	9.72	-0.961687	2.44622e-05
higher RPS in liver	6	19154194	ENSSSCG00000034414	PSME3IP1	5.18137	1.49574	3.54817e-07	3.685	4	0	0	4	1	0	0	1	Active	Active	116.05	94.56	0.352551	0.0915289
higher RPS in liver	6	19154416	ENSSSCG00000002820	RSPRY1	5.18137	1.49574	3.54817e-07	3.685	4	0	0	4	1	0	0	1	Active	Active	27.2	16.83	0.736252	1.1219e-07
higher RPS in liver	6	20100567	ENSSSCG00000028587	PRSS54	6.18265	2.63896	2.55073e-06	3.54125	5	0	0	5	2	0	0	2	Inactive	Inactive	2.53	0	8.98907	4.72198e-14
higher RPS in liver	6	20223871	ENSSSCG00000021911	NDRG4	4.37186	1.32289	0.000160708	3.05125	4	0	0	4	1	0	0	1	Active	Active	1.9	6.83	-1.57066	2.32997e-11
higher RPS in liver	6	20266552	ENSSSCG00000026505	SETD6	19.729	11.9988	4.124e-10	7.73125	14	5	4	5	8	0	2	6	Active	Active	19.15	18.37	0.195909	0.3976
higher RPS in liver	6	20401684	ENSSSCG00000040881	SLC38A7	6.52769	2.55303	2.90435e-06	3.97625	5	0	2	3	2	0	0	2	Active	Active	9.29	7.01	0.437108	0.0279651
higher RPS in liver	6	27684030	ENSSSCG00000033811	CBFB	16.863	8.12621	2.63575e-07	8.7375	12	0	2	10	6	0	1	5	Active	Active	77.44	41.81	0.940769	3.33989e-06
higher RPS in liver	6	27808652	ENSSSCG00000002792	HSF4	22.7761	12.5923	7.5902e-09	10.185	16	7	0	9	9	0	0	9	Active	Active	2.67	1.96	0.583281	0.137872
higher RPS in liver	6	27809430	ENSSSCG00000040125	NOL3	22.7761	12.5923	7.5902e-09	10.185	16	7	0	9	9	0	0	9	Active	Active	4.69	20.54	-1.95423	3.56329e-10
higher RPS in liver	6	27832157	ENSSSCG00000032443	KIAA0895L	9.07562	2.59232	1.85533e-08	6.4825	7	3	0	4	2	0	0	2	Active	Active	1.97	4.65	-1.12006	4.48219e-11
higher RPS in liver	6	27832452	ENSSSCG00000002788	EXOC3L1	9.07562	2.59232	1.85533e-08	6.4825	7	3	0	4	2	0	0	2	Active	Active	3.16	5.42	-0.852358	0.00111719
higher RPS in liver	6	27833924	ENSSSCG00000002787	E2F4	9.07562	2.59232	1.85533e-08	6.4825	7	3	0	4	2	0	0	2	Active	Active	23.67	44.36	-0.866891	0.000978885
higher RPS in liver	6	27841624	ENSSSCG00000002786	ELMO3	5.18211	0	4.90184e-06	5.17625	5	2	0	3	0	0	0	0	Active	Active	17.08	1.86	3.14244	3.55052e-13
higher RPS in liver	6	28280405	ENSSSCG00000029590	ACD	8.99196	4.76936	1.45637e-05	4.22	7	0	2	5	4	0	0	4	Active	Active	7.42	7.67	-0.10666	0.697411
higher RPS in liver	6	28280502	ENSSSCG00000034863	PARD6A	8.99196	4.76936	1.45637e-05	4.22	7	0	2	5	4	0	0	4	Active	Active	0.84	1.16	-0.673142	0.0230653
higher RPS in liver	6	28287184	ENSSSCG00000028661	ENKD1	12.683	9.57391	0.000205456	3.11	10	0	5	5	7	0	0	7	Active	Active	0.51	1.17	-1.08597	0.0093319
higher RPS in liver	6	28287414	ENSSSCG00000021711	C16ORF86	12.683	9.57391	0.000205456	3.11	10	0	5	5	7	0	0	7	Active	Active	0	0	-	-
higher RPS in liver	6	28838444	ENSSSCG00000044005	Unknown	14.1213	0	1.05339e-06	14.1137	12	0	0	12	0	0	0	0	Inactive	Inactive	0.93	1.58	-0.490242	0.140219
higher RPS in liver	6	28883548	ENSSSCG00000033167	SLC7A6OS	8.26639	2.7725	2.01394e-05	5.49375	6	0	0	6	2	0	0	2	Active	Active	15.13	18.62	-0.213953	0.252633
higher RPS in liver	6	28883158	ENSSSCG00000002763	PRMT7	8.26639	2.7725	2.01394e-05	5.49375	6	0	0	6	2	0	0	2	Active	Active	58.85	109.44	-0.841727	3.61845e-05
higher RPS in liver	6	29025357	ENSSSCG00000002764	SMPD3	19.7327	9.77637	3.55502e-08	9.955	13	8	0	5	8	0	0	8	Active	Active	9.98	0.13	6.41012	1.77316e-85
higher RPS in liver	6	29842819	ENSSSCG00000034721	CES5A	3.5161	0.48768	0.000616834	3.025	3	1	0	2	1	0	0	1	Inactive	Inactive	1.78	0.5	2.13562	0.00720619
higher RPS in liver	6	32494170	ENSSSCG00000002835	TOX3	4.29855	0	6.83769e-08	4.29375	3	0	1	2	0	0	0	0	Active	Active	1.33	0.06	5.48215	1.75913e-14
higher RPS in liver	6	34585779	ENSSSCG00000039408	ADCY7	11.3823	5.72995	9.43238e-09	5.6525	8	0	2	6	4	0	2	2	Active	Active	5.6	11.5	-1.00304	2.44565e-05
higher RPS in liver	6	38029572	ENSSSCG00000002849	SHCBP1	7.5293	0	3.82145e-10	7.52375	6	0	1	5	0	0	0	0	Inactive	Inactive	59.48	5.05	3.53596	0.00137735
higher RPS in liver	6	41423751	ENSSSCG00000025214	TSHZ3	4.4714	1.41392	3.3433e-08	3.06125	3	0	0	3	1	0	0	1	Active	Active	0.46	1.79	-1.92512	4.67928e-15
higher RPS in liver	6	43017555	ENSSSCG00000002864	SLC7A10	9.7576	5.99981	1.28617e-07	3.75875	7	2	1	4	4	0	0	4	Active	Active	0.57	15.64	-5.06895	7.61255e-56
higher RPS in liver	6	43085836	ENSSSCG00000002866	CEBPA	14.2733	9.98058	2.23306e-06	4.29125	9	5	0	4	7	0	0	7	Active	Active	101.76	7.23	3.64543	2.64507e-129
higher RPS in liver	6	43164918	ENSSSCG00000002867	CEBPG	6.11144	2.67654	0.000213645	3.43625	5	0	0	5	2	0	0	2	Active	Active	76.69	89.13	-0.097686	0.758517
higher RPS in liver	6	43529806	ENSSSCG00000033695	KCTD15	39.3219	13.2241	1.73957e-11	26.095	27	0	6	21	9	0	0	9	Active	Active	14.45	41.8	-1.33815	1.18087e-06
higher RPS in liver	6	43933759	ENSSSCG00000002873	GPI	10.5768	4.27332	2.34923e-09	6.30625	7	6	0	1	3	0	0	3	Active	Active	103.44	352.47	-1.81795	1.167e-11
higher RPS in liver	6	43933787	ENSSSCG00000002872	GARRE1	10.5768	4.27332	2.34923e-09	6.30625	7	6	0	1	3	0	0	3	Active	Active	5.16	7.57	-0.535558	0.00665514
higher RPS in liver	6	44667801	ENSSSCG00000021374	FXYD1	12.15	5.11927	1.06875e-09	7.02875	8	0	4	4	3	0	0	3	Active	Active	163.45	1384.39	-3.39956	3.20248e-30
higher RPS in liver	6	44682153	ENSSSCG00000025499	Unknown	6.85729	0	1.56369e-07	6.85375	5	0	4	1	0	0	0	0	Active	Active	10.23	6.52	0.743387	0.000286606
higher RPS in liver	6	44746906	ENSSSCG00000027989	FAM187B	5.46201	0	1.92423e-08	5.4575	4	0	1	3	0	0	0	0	Inactive	Inactive	0.92	0.18	2.64756	0.0364313
higher RPS in liver	6	44820683	ENSSSCG00000002893	CD22	13.2408	0	1.20729e-11	13.2375	9	0	2	7	0	0	0	0	Active	Inactive	1.12	1.24	0.0495393	0.894958
higher RPS in liver	6	44837096	ENSSSCG00000002891	GPR42	18.5388	3.82925	3.05193e-09	14.7125	11	0	3	8	3	0	0	3	Inactive	Active	0.28	0.01	-	-
higher RPS in liver	6	44899336	ENSSSCG00000032438	FFAR2	7.65577	0	2.29559e-11	7.65	5	0	4	1	0	0	0	0	Inactive	Inactive	3.99	1.26	1.80286	0.00168548
higher RPS in liver	6	44935596	ENSSSCG00000002882	KRTDAP	10.7737	1.43387	5.95073e-11	9.3375	7	0	6	1	1	0	0	1	Inactive	Active	0.26	0.14	-	-
higher RPS in liver	6	45285698	ENSSSCG00000002916	APLP1	4.74108	1.57973	3.77778e-07	3.16375	3	0	0	3	1	0	1	0	Active	Active	0.99	5.52	-2.39117	8.20346e-13
higher RPS in liver	6	45289826	ENSSSCG00000002918	HCST	4.74108	1.57973	3.77778e-07	3.16375	3	0	0	3	1	0	1	0	Inactive	Inactive	2.26	1.23	1.03832	0.0298862
higher RPS in liver	6	46786247	ENSSSCG00000029408	ZFP30	12.4489	9.02917	0.00131742	3.41875	9	0	0	9	6	0	0	6	Active	Active	23.19	30.26	-0.237476	0.268211
higher RPS in liver	6	46866257	ENSSSCG00000041806	Unknown	6.17603	0.820924	0.000193104	5.35375	7	0	0	7	1	0	0	1	Inactive	Inactive	0.01	0	-	-
higher RPS in liver	6	48986923	ENSSSCG00000002997	MIA	5.82597	2.72283	6.05021e-09	3.105	4	0	0	4	2	0	0	2	Inactive	Active	1.16	2.11	-1.42522	0.0880959
higher RPS in liver	6	48989079	ENSSSCG00000002996	RAB4B-EGLN2	5.82597	2.72283	6.05021e-09	3.105	4	0	0	4	2	0	0	2	Active	Active	29.8	25.97	0.328695	0.18068
higher RPS in liver	6	48989935	ENSSSCG00000002995	EGLN2	5.82597	2.72283	6.05021e-09	3.105	4	0	0	4	2	0	0	2	Active	Active	4.95	4.24	0.213728	0.53107
higher RPS in liver	6	49410238	ENSSSCG00000032711	DMAC2	4.29609	0	4.15197e-09	4.29	3	0	2	1	0	0	0	0	Active	Active	25.54	135.09	-2.4233	3.25282e-24
higher RPS in liver	6	49414734	ENSSSCG00000040022	ERICH4	4.29609	0	4.15197e-09	4.29	3	0	2	1	0	0	0	0	Inactive	Active	0.35	0.27	-	-
higher RPS in liver	6	50139079	ENSSSCG00000051733	PSG9	6.18238	2.66046	5.2625e-06	3.52375	4	0	0	4	2	0	0	2	Inactive	Inactive	2.22	0.09	5.90574	0.00167236
higher RPS in liver	6	50158685	ENSSSCG00000024568	PSG9	3.93223	0	1.67591e-06	3.9275	3	0	0	3	0	0	0	0	Inactive	Inactive	11.77	0.46	4.9574	1.03057e-14
higher RPS in liver	6	50184119	ENSSSCG00000037422	Unknown	13.6217	3.97929	1.61497e-06	9.64375	11	0	2	9	4	0	0	4	Inactive	Inactive	3.36	0.29	4.52803	0.00164402
higher RPS in liver	6	50366240	ENSSSCG00000003062	LYPD3	6.4082	0	2.11157e-11	6.40375	4	0	3	1	0	0	0	0	Inactive	Inactive	1.94	0.02	6.31602	2.15244e-17
higher RPS in liver	6	50373982	ENSSSCG00000003063	PHLDB3	11.2057	1.46986	3.16142e-12	9.7375	7	0	5	2	1	0	0	1	Active	Active	3.14	0.66	2.35519	3.79439e-17
higher RPS in liver	6	51372259	ENSSSCG00000003088	APOE	7.41476	3.76344	3.48579e-06	3.65	6	0	1	5	3	0	0	3	Active	Active	4529.33	34.81	6.85069	3.77427e-103
higher RPS in liver	6	51400839	ENSSSCG00000003086	APOC2	5.57633	1.43367	5.53362e-08	4.14125	3	0	0	3	1	0	0	1	Active	Active	3635.76	1.73	10.9131	0
higher RPS in liver	6	51508324	ENSSSCG00000031166	ZNF296	3.29228	0	2.73605e-06	3.2875	3	0	0	3	0	0	0	0	Active	Active	0.21	0.48	-	-
higher RPS in liver	6	51507437	ENSSSCG00000033194	GEMIN7	3.29228	0	2.73605e-06	3.2875	3	0	0	3	0	0	0	0	Active	Active	11.27	6.9	0.646923	0.0612148
higher RPS in liver	6	51866100	ENSSSCG00000037001	PPM1N	15.5457	11.8205	1.02808e-05	3.725	10	0	1	9	8	0	1	7	Active	Active	0.62	1.71	-1.35151	0.000225115
higher RPS in liver	6	51872812	ENSSSCG00000036317	VASP	11.8896	6.04719	1.87416e-08	5.84375	8	0	1	7	4	0	0	4	Active	Active	55	42.23	0.406557	0.0216315
higher RPS in liver	6	52711901	ENSSSCG00000003107	ARHGAP35	28.8469	25.521	1.34643e-06	3.32625	18	0	11	7	15	0	1	14	Active	Active	40.72	62.63	-0.439374	0.0430868
higher RPS in liver	6	53080282	ENSSSCG00000037986	INAFM1	7.11727	1.35709	4.57453e-09	5.76125	5	0	0	5	1	0	1	0	Active	Active	0.19	1.01	-2.11157	0.0730191
higher RPS in liver	6	53097164	ENSSSCG00000029371	C5AR1	5.98782	1.45563	4.18011e-09	4.53375	4	0	0	4	1	0	1	0	Active	Active	4.29	2.37	0.938727	1.67545e-07
higher RPS in liver	6	53974010	ENSSSCG00000025975	FAM83E	10.7207	6.52578	2.08919e-07	4.19625	8	0	0	8	5	0	0	5	Active	Active	0.26	0.1	-	-
higher RPS in liver	6	54880807	ENSSSCG00000003195	PNKP	6.07356	0	1.01529e-08	6.0675	4	0	0	4	0	0	0	0	Active	Active	24.4	22.7	0.0282232	0.860288
higher RPS in liver	6	54889954	ENSSSCG00000003194	AKT1S1	4.62898	0	9.6798e-10	4.62375	3	0	0	3	0	0	0	0	Active	Active	22.74	51.03	-1.34769	1.45997e-08
higher RPS in liver	6	54890019	ENSSSCG00000003193	TBC1D17	6.20709	0	1.41135e-06	6.20125	4	0	0	4	0	0	0	0	Active	Active	21.12	27.77	-0.550111	0.0553832
higher RPS in liver	6	55534969	ENSSSCG00000048990	Unknown	11.2651	5.76911	5.77541e-05	5.4975	8	0	0	8	4	0	1	3	Inactive	Active	0.32	0.37	-	-
higher RPS in liver	6	55537076	ENSSSCG00000024736	ACP4	8.4475	3.1924	2.43011e-05	5.25625	7	0	0	7	3	0	1	2	Inactive	Active	5.02	8.65	-0.92887	0.0454185
higher RPS in liver	6	55745630	ENSSSCG00000040236	CTU1	3.84316	0	4.92399e-08	3.84	3	0	0	3	0	0	0	0	Active	Active	12.3	11.47	0.235016	0.36871
higher RPS in liver	6	55745859	ENSSSCG00000037466	Unknown	3.84316	0	4.92399e-08	3.84	3	0	0	3	0	0	0	0	Active	Active	51.23	6.09	3.04803	1.76525e-22
higher RPS in liver	6	55829971	ENSSSCG00000003227	IGLON5	34.1482	28.1924	2.50399e-08	5.955	22	0	0	22	18	0	1	17	Inactive	Active	0	0	-	-
higher RPS in liver	6	55914342	ENSSSCG00000028802	Unknown	37.6212	32.987	3.44732e-05	4.635	25	0	0	25	23	0	7	16	Active	Active	5.57	0.5	3.44689	1.80058e-12
higher RPS in liver	6	55927280	ENSSSCG00000029785	RPS9	12.6164	4.87335	8.78653e-08	7.745	10	0	0	10	4	0	3	1	Active	Active	2718.44	2659.19	0.0411949	0.856265
higher RPS in liver	6	55947109	ENSSSCG00000003268	TSEN34	5.97947	2.38915	1.60364e-05	3.59	5	0	0	5	2	0	2	0	Inactive	Inactive	47.5	18.86	1.25477	3.99426e-09
higher RPS in liver	6	55939450	ENSSSCG00000003267	MBOAT7	5.06533	1.00874	2.99047e-05	4.0575	4	0	0	4	1	0	0	1	Active	Active	24.76	12.25	0.960781	6.79409e-09
higher RPS in liver	6	56028400	ENSSSCG00000003261	NDUFA3	17.2776	3.39813	9.50301e-09	13.8763	14	0	0	14	3	0	1	2	Active	Active	155.89	370.46	-1.49371	2.1724e-10
higher RPS in liver	6	56021363	ENSSSCG00000003259	OSCAR	5.73702	1.18871	5.68632e-06	4.54875	5	0	0	5	1	0	1	0	Active	Active	2.76	2.41	0.331621	0.124762
higher RPS in liver	6	56038524	ENSSSCG00000042091	TARM1	20.2624	7.0284	3.57722e-09	13.2338	16	0	0	16	6	0	3	3	Active	Inactive	2.13	0.05	6.00996	3.05201e-05
higher RPS in liver	6	56278582	ENSSSCG00000003253	MYADM	12.1934	8.8073	1.97171e-08	3.3875	8	0	3	5	6	0	0	6	Active	Active	12.93	69.44	-2.3851	3.89212e-21
higher RPS in liver	6	56389759	ENSSSCG00000032113	Unknown	9.29409	5.87076	0.000297986	3.42375	9	0	0	9	5	0	0	5	Active	Active	4.88	2.61	1.0254	6.12704e-05
higher RPS in liver	6	56543154	ENSSSCG00000032690	Unknown	10.009	6.20657	0.000153384	3.8025	8	0	0	8	5	0	0	5	Active	Active	0.44	0.05	-	-
higher RPS in liver	6	56568363	ENSSSCG00000046881	DPRX	5.38079	1.7573	0.00571743	3.62125	5	0	0	5	3	0	0	3	Inactive	Inactive	0.52	1.01	-0.7455	0.109225
higher RPS in liver	6	56709786	ENSSSCG00000042197	Unknown	7.09538	2.56139	0.00099141	4.53375	6	0	0	6	4	0	0	4	Inactive	Inactive	0	0	-	-
higher RPS in liver	6	58396490	ENSSSCG00000003235	CTU1	6.20732	0	2.33134e-05	6.20375	7	0	0	7	0	0	0	0	Active	Active	3.52	3.73	0.00563389	0.977267
higher RPS in liver	6	58396777	ENSSSCG00000003234	Unknown	6.20732	0	2.33134e-05	6.20375	7	0	0	7	0	0	0	0	Active	Active	0.43	0.94	-1.28643	0.0153355
higher RPS in liver	6	58463248	ENSSSCG00000022906	SIGLEC10	14.583	10.0334	1.26712e-05	4.54625	11	0	0	11	8	0	1	7	Inactive	Inactive	24.48	28.04	-0.162724	0.280892
higher RPS in liver	6	58632807	ENSSSCG00000036017	Unknown	30.005	23.4861	0.00407196	6.5175	25	0	2	23	20	0	2	18	Active	Inactive	0.43	0.01	-	-
higher RPS in liver	6	58750154	ENSSSCG00000029231	Unknown	12.5948	7.33692	0.00109896	5.25625	10	0	0	10	6	0	0	6	Active	Active	1.45	0.9	0.860117	0.0117507
higher RPS in liver	6	59544896	ENSSSCG00000040725	IL11	4.18726	0	1.20724e-08	4.1825	3	0	0	3	0	0	0	0	Inactive	Active	0.24	0.14	-	-
higher RPS in liver	6	60168340	ENSSSCG00000048710	Unknown	4.45876	0	9.39158e-05	4.45375	5	0	2	3	0	0	0	0	Inactive	Inactive	0.31	0.42	-	-
higher RPS in liver	6	60520803	ENSSSCG00000037756	Unknown	16.5884	10.0459	0.00256095	6.54125	25	0	3	22	17	0	1	16	Inactive	Inactive	0.18	0	-	-
higher RPS in liver	6	60523825	ENSSSCG00000042659	Unknown	16.5884	10.0459	0.00256095	6.54125	25	0	3	22	17	0	1	16	Inactive	Inactive	0	0	-	-
higher RPS in liver	6	61624377	ENSSSCG00000035385	Unknown	43.1938	26.6047	0.00372026	16.5875	72	0	0	72	47	0	2	45	Active	Inactive	0.35	0	-	-
higher RPS in liver	6	61695111	ENSSSCG00000034301	ZNF304	6.58097	2.22541	0.00127709	4.35375	9	0	0	9	3	0	0	3	Active	Active	8.88	17.09	-0.878354	8.4144e-06
higher RPS in liver	6	61869175	ENSSSCG00000047112	Unknown	18.8706	14.6772	0.039154	4.19375	22	0	1	21	17	0	1	16	Active	Active	11.6	17.51	-0.21284	0.723867
higher RPS in liver	6	62992517	ENSSSCG00000004004	ZNF584	14.5006	4.28047	1.56678e-07	10.2212	10	0	0	10	3	0	0	3	Active	Active	6.54	9.1	-0.462641	0.0638633
higher RPS in liver	6	63043231	ENSSSCG00000031342	ZNF324	11.5185	1.48926	8.37679e-08	10.03	8	0	0	8	1	0	0	1	Active	Active	6.82	9.72	-0.37209	0.2915
higher RPS in liver	6	63048073	ENSSSCG00000039930	ZNF446	7.93166	0.971368	6.47753e-08	6.95875	6	0	0	6	1	0	0	1	Active	Active	6.16	3.27	0.771691	4.225e-05
higher RPS in liver	6	63075204	ENSSSCG00000031449	SLC27A5	8.76198	4.71273	0.000174621	4.05	8	0	0	8	5	0	0	5	Active	Active	152.26	0.71	7.56115	4.10597e-69
higher RPS in liver	6	63079244	ENSSSCG00000035664	ZBTB45	8.76198	4.71273	0.000174621	4.05	8	0	0	8	5	0	0	5	Active	Active	8.3	0.83	2.94656	5.67987e-13
higher RPS in liver	6	63094648	ENSSSCG00000037920	TRIM28	10.9134	4.60719	6.21357e-06	6.305	8	0	0	8	4	0	0	4	Active	Active	98.18	141.52	-0.479164	0.038833
higher RPS in liver	6	68629214	ENSSSCG00000003385	PARK7	8.08871	3.70181	4.20521e-06	4.38625	6	0	0	6	3	0	0	3	Active	Active	608.17	566.78	0.0443076	0.809851
higher RPS in liver	6	68682624	ENSSSCG00000035774	ERRFI1	45.2694	35.9518	2.47092e-06	9.31625	30	0	7	23	24	11	0	13	Active	Active	47.77	10.68	1.69496	3.46126e-13
higher RPS in liver	6	72256877	ENSSSCG00000003438	VPS13D	7.92953	0	3.44152e-08	7.925	6	0	2	4	0	0	0	0	Active	Active	13.65	44.44	-1.4855	7.06201e-09
higher RPS in liver	6	73117221	ENSSSCG00000020710	PRDM2	8.59564	4.26719	1.68367e-06	4.33	7	3	1	3	4	0	1	3	Active	Inactive	15.86	24.3	-0.521058	0.0111719
higher RPS in liver	6	74226992	ENSSSCG00000043303	Unknown	18.1067	13.28	8.24707e-06	4.82875	12	0	0	12	9	0	2	7	Inactive	Inactive	0.71	0.95	-0.301354	0.294639
higher RPS in liver	6	74434050	ENSSSCG00000021026	TMEM51	19.9507	6.18048	9.59076e-08	13.7688	13	0	7	6	5	0	0	5	Active	Active	32.26	6.27	2.37126	2.61152e-20
higher RPS in liver	6	75678378	ENSSSCG00000020926	SDHB	9.05452	6.00484	2.19943e-08	3.04875	6	0	1	5	4	0	0	4	Active	Active	800.94	1392.36	-0.84242	5.10017e-07
higher RPS in liver	6	75755892	ENSSSCG00000026478	PADI2	27.1153	4.69591	3.91481e-11	22.4175	19	0	2	17	4	0	1	3	Active	Active	1.36	6.49	-2.05749	6.75972e-06
higher RPS in liver	6	75874213	ENSSSCG00000003482	PADI3	6.08751	1.6984	7.63158e-07	4.39125	4	0	0	4	2	0	0	2	Inactive	Inactive	0.14	0	-	-
higher RPS in liver	6	75969925	ENSSSCG00000003484	PADI6	4.32693	0	5.91078e-07	4.3225	4	0	0	4	0	0	0	0	Inactive	Inactive	0.04	0.13	-	-
higher RPS in liver	6	76064311	ENSSSCG00000003486	ARHGEF10L	12.3491	9.15553	7.66114e-07	3.19375	9	0	3	6	6	0	0	6	Inactive	Active	54.49	64.21	-0.326058	0.100648
higher RPS in liver	6	78241599	ENSSSCG00000039652	OTUD3	9.845	0	4.53504e-07	9.84	8	0	0	8	0	0	0	0	Active	Active	6.71	13.76	-0.931822	2.58862e-06
higher RPS in liver	6	80137952	ENSSSCG00000003521	WNT4	25.4001	8.2947	3.34066e-08	17.1062	19	4	4	11	7	0	0	7	Active	Active	2.71	3.47	-0.283994	0.53494
higher RPS in liver	6	80903496	ENSSSCG00000003531	KDM1A	11.4769	6.84879	2.02382e-06	4.6275	9	0	4	5	5	0	1	4	Active	Active	48.56	74.25	-0.56932	0.000137065
higher RPS in liver	6	82672445	ENSSSCG00000037664	Unknown	8.52706	0	3.50747e-09	8.5225	7	0	3	4	0	0	0	0	Inactive	Inactive	0.23	0.99	-2.04792	0.0282279
higher RPS in liver	6	83030701	ENSSSCG00000003549	LDLRAP1	18.3594	10.1854	4.27195e-06	8.17375	14	4	1	9	8	0	0	8	Active	Active	23.26	25.56	-0.0396277	0.873966
higher RPS in liver	6	83089072	ENSSSCG00000023235	MAN1C1	27.2029	20.1141	1.64378e-05	7.09	20	10	1	9	14	0	0	14	Active	Active	64.6	11.02	2.48215	2.37924e-52
higher RPS in liver	6	83246934	ENSSSCG00000003554	AL020996.2	60.3879	46.1646	2.08392e-08	14.2212	42	0	12	30	31	0	2	29	Active	Active	12.32	50.7	-2.08184	3.45599e-29
higher RPS in liver	6	83446834	ENSSSCG00000038619	PAFAH2	17.5648	13.9156	3.18683e-06	3.6475	12	0	4	8	8	0	0	8	Active	Active	99.66	50.28	1.12098	7.44452e-07
higher RPS in liver	6	83905076	ENSSSCG00000003558	RPS6KA1	3.82186	0	3.87673e-10	3.8175	3	0	0	3	0	0	0	0	Active	Active	25.94	8.15	1.73008	3.87068e-21
higher RPS in liver	6	84129965	ENSSSCG00000040007	PIGV	46.0814	24.8105	5.67945e-11	21.2725	30	0	7	23	15	0	6	9	Active	Active	29.56	13.58	1.06557	4.79817e-05
higher RPS in liver	6	84153717	ENSSSCG00000003561	ZDHHC18	21.2783	8.69771	5.05087e-10	12.58	15	0	4	11	6	0	4	2	Active	Active	6.49	12.79	-0.928093	3.25414e-05
higher RPS in liver	6	85324228	ENSSSCG00000029438	SESN2	6.00233	0	2.40383e-07	5.99875	5	0	0	5	0	0	0	0	Active	Active	10.06	35.41	-1.94022	NA
higher RPS in liver	6	85384080	ENSSSCG00000044404	MED18	5.67321	0	2.81327e-09	5.6675	4	1	0	3	0	0	0	0	Active	Active	30.9	25.07	0.334001	0.0689712
higher RPS in liver	6	86137737	ENSSSCG00000003590	PTPRU	11.5745	4.54264	1.53277e-08	7.03	9	0	0	9	3	0	2	1	Active	Active	2.77	1.99	0.78825	0.0232254
higher RPS in liver	6	86305250	ENSSSCG00000049560	Unknown	4.9274	0	1.90543e-06	4.92125	4	0	0	4	0	0	0	0	Inactive	Inactive	0	0	-	-
higher RPS in liver	6	87687442	ENSSSCG00000003591	PUM1	9.40516	1.26291	3.70849e-11	8.14	7	0	2	5	1	0	0	1	Active	Active	65.2	110.92	-0.655677	1.10701e-09
higher RPS in liver	6	88349963	ENSSSCG00000003606	SPOCD1	19.9285	15.5315	9.31587e-06	4.39875	15	0	5	10	11	0	5	6	Active	Inactive	0.04	0.01	-	-
higher RPS in liver	6	89026710	ENSSSCG00000021232	SYNC	7.2212	2.72811	1.42912e-10	4.49375	5	0	0	5	2	0	2	0	Active	Active	0.94	64.41	-5.94765	3.48414e-77
higher RPS in liver	6	91031849	ENSSSCG00000038677	GJB3	8.82533	4.23721	1.67322e-07	4.58625	6	0	0	6	3	0	0	3	Active	Active	2.3	0.4	1.90471	0.00332529
higher RPS in liver	6	91045393	ENSSSCG00000039983	GJA4	9.89646	3.868	5.35907e-07	6.0275	7	0	0	7	3	0	0	3	Active	Active	27.53	24.33	-0.0697974	0.835679
higher RPS in liver	6	91764434	ENSSSCG00000040097	TFAP2E	18.5375	2.67934	3.43863e-12	15.855	13	0	2	11	2	0	1	1	Active	Active	0.03	0.01	-	-
higher RPS in liver	6	91890492	ENSSSCG00000037600	C1ORF216	5.67348	1.30942	2.14867e-10	4.3625	4	0	0	4	1	0	1	0	Active	Active	1.7	2.56	-0.548649	0.0335057
higher RPS in liver	6	93128582	ENSSSCG00000003640	GRIK3	3.98857	0	7.24183e-08	3.98375	3	0	0	3	0	0	0	0	Inactive	Active	0.07	0.87	-3.56699	7.21594e-24
higher RPS in liver	6	94960457	ENSSSCG00000003654	MACF1	6.45041	2.73211	9.08176e-08	3.71875	5	0	3	2	2	0	1	1	Active	Active	72.83	95.45	-0.171406	0.316461
higher RPS in liver	6	95312977	ENSSSCG00000036451	Unknown	3.37778	0	1.87684e-06	3.37125	3	0	1	2	0	0	0	0	Inactive	Inactive	56.3	15.62	2.04256	4.1979e-07
higher RPS in liver	6	95599055	ENSSSCG00000037514	BMP8B	21.5259	14.8306	0.000196647	6.695	15	0	0	15	10	0	7	3	Active	Active	4.68	0.84	2.15607	3.42576e-10
higher RPS in liver	6	95683805	ENSSSCG00000003667	TRIT1	4.02514	0	3.08391e-09	4.02	3	0	2	1	0	0	0	0	Active	Active	34.75	45.14	-0.243782	0.235786
higher RPS in liver	6	95702648	ENSSSCG00000039761	MYCL	16.9299	11.0478	5.70672e-08	5.88375	11	0	5	6	7	0	5	2	Active	Active	26.71	0.7	5.12619	3.06887e-47
higher RPS in liver	6	95860837	ENSSSCG00000036673	PPT1	9.17935	1.30753	2.58489e-11	7.87375	7	0	0	7	1	0	0	1	Active	Active	109.96	65.43	0.768808	0.00551
higher RPS in liver	6	95900086	ENSSSCG00000003670	RLF	7.87063	0	9.63508e-09	7.865	7	0	0	7	0	0	0	0	Active	Active	22.29	32.16	-0.426104	0.0150573
higher RPS in liver	6	96323339	ENSSSCG00000028411	MC5R	13.4624	0	1.68987e-10	13.4588	10	0	1	9	0	0	0	0	Inactive	Active	0.16	0.18	-	-
higher RPS in liver	6	96577643	ENSSSCG00000027417	LDLRAD4	44.6418	33.4369	6.24092e-09	11.205	29	7	10	12	22	0	7	15	Active	Active	19.42	11.74	0.805049	0.000464095
higher RPS in liver	6	96588652	ENSSSCG00000042818	Unknown	28.5938	21.2278	1.6471e-07	7.36625	20	1	10	9	15	0	3	12	Inactive	Inactive	0.67	1.52	-0.771281	0.0389003
higher RPS in liver	6	96733799	ENSSSCG00000003673	CEP192	16.2304	5.41108	1.36566e-10	10.82	11	6	0	5	4	0	1	3	Active	Active	96.41	74.67	0.370761	0.00334915
higher RPS in liver	6	96770251	ENSSSCG00000021738	PTPN2	21.6617	3.88131	3.57896e-09	17.7825	15	12	0	3	3	0	2	1	Active	Active	19.04	7.54	1.42034	1.90579e-25
higher RPS in liver	6	96849912	ENSSSCG00000044092	Unknown	14.8621	5.26564	1.58685e-10	9.5925	10	0	1	9	4	0	0	4	Inactive	Inactive	0.56	1.16	-0.840919	0.0099251
higher RPS in liver	6	96893474	ENSSSCG00000031730	PSMG2	17.7471	3.96115	2.37496e-09	13.7875	13	0	3	10	3	0	0	3	Active	Active	51.45	59.16	-0.0983012	0.719897
higher RPS in liver	6	96893571	ENSSSCG00000027007	CEP76	17.7471	3.96115	2.37496e-09	13.7875	13	0	3	10	3	0	0	3	Active	Active	11.4	9.13	0.373492	0.0076852
higher RPS in liver	6	97974636	ENSSSCG00000038533	NAPG	13.6158	9.26925	2.73251e-08	4.3475	9	0	3	6	6	0	3	3	Active	Active	26	35.66	-0.396197	0.042758
higher RPS in liver	6	98462827	ENSSSCG00000003679	PPP4R1	11.3007	6.785	1.84158e-08	4.51375	8	0	5	3	5	0	1	4	Active	Active	24.33	22.62	0.274775	0.0916786
higher RPS in liver	6	106798265	ENSSSCG00000003701	SNRPD1	5.27231	1.2854	2.54213e-08	3.9875	4	0	1	3	1	0	1	0	Active	Active	61.99	34.28	0.985139	7.76523e-05
higher RPS in liver	6	108115886	ENSSSCG00000003705	CABLES1	28.2343	10.4737	4.83062e-09	17.7587	21	0	5	16	8	0	3	5	Active	Active	9.01	4.26	1.18985	2.2383e-05
higher RPS in liver	6	108450990	ENSSSCG00000003707	NPC1	10.6078	6.76867	4.21807e-09	3.8375	7	0	2	5	4	0	1	3	Active	Active	16.01	12.8	0.407877	0.0986266
higher RPS in liver	6	108860322	ENSSSCG00000003710	TTC39C	7.23031	0	4.46904e-08	7.225	6	1	5	0	0	0	0	0	Active	Active	98.31	7.19	3.85792	6.7818e-46
higher RPS in liver	6	108909974	ENSSSCG00000003711	CABYR	12.2819	0	1.3326e-09	12.275	9	8	0	1	0	0	0	0	Inactive	Inactive	14.72	1.69	3.21993	1.11013e-25
higher RPS in liver	6	111773746	ENSSSCG00000045209	Unknown	5.91945	2.26964	0.038052	3.65	12	0	2	10	5	0	1	4	Inactive	Inactive	0.38	0	-	-
higher RPS in liver	6	112628432	ENSSSCG00000003722	CDH2	22.8837	0	3.73354e-11	22.8775	16	13	1	2	0	0	0	0	Active	Active	87.23	2.87	4.87503	2.6783e-37
higher RPS in liver	6	115400252	ENSSSCG00000022739	DSG2	5.71425	0	1.0617e-10	5.70875	4	0	0	4	0	0	0	0	Active	Active	70.37	1.71	5.34683	4.09211e-95
higher RPS in liver	6	115592726	ENSSSCG00000025005	B4GALT6	7.57963	0	1.11561e-07	7.575	6	0	0	6	0	0	0	0	Active	Active	10.19	0.71	3.91536	9.12941e-47
higher RPS in liver	6	115786634	ENSSSCG00000003728	TRAPPC8	21.7299	2.50119	2.63327e-13	19.2275	16	4	2	10	2	0	0	2	Active	Active	80.66	70.64	0.264566	0.118368
higher RPS in liver	6	115926774	ENSSSCG00000003730	RNF138	8.43981	1.07127	5.32977e-09	7.36625	7	4	0	3	1	0	0	1	Active	Active	48.76	10.96	2.24761	6.58329e-15
higher RPS in liver	6	116325331	ENSSSCG00000003731	GAREM1	23.5751	15.9241	2.23204e-07	7.6525	18	0	6	12	11	0	1	10	Active	Active	17.02	8.2	1.17041	1.22728e-08
higher RPS in liver	6	116113899	ENSSSCG00000050585	Unknown	20.4222	14.7715	5.95645e-06	5.65	16	0	4	12	11	0	1	10	Inactive	Inactive	1.04	1.19	-0.000415318	0.999143
higher RPS in liver	6	119885463	ENSSSCG00000020898	ELP2	4.11337	0	1.74771e-09	4.10875	3	0	0	3	0	0	0	0	Active	Active	48.67	70.42	-0.33782	0.0454826
higher RPS in liver	6	134680050	ENSSSCG00000027660	IFI44L	14.6944	7.15081	1.28951e-08	7.5425	11	0	0	11	5	0	0	5	Inactive	Inactive	232.06	137.34	0.935407	0.38355
higher RPS in liver	6	137595108	ENSSSCG00000003776	ACADM	16.2219	0.36474	7.06398e-09	15.8537	13	0	0	13	1	0	0	1	Active	Active	1846.73	871.33	1.0343	0.0013401
higher RPS in liver	6	137595524	ENSSSCG00000003777	SLC44A5	16.2219	0.36474	7.06398e-09	15.8537	13	0	0	13	1	0	0	1	Active	Active	0.51	0.34	0.692111	0.111217
higher RPS in liver	6	141958954	ENSSSCG00000003788	PTGER3	9.15329	5.80957	2.65045e-05	3.34375	7	0	3	4	4	0	0	4	Active	Active	5.14	1.35	2.23853	1.00664e-08
higher RPS in liver	6	142642073	ENSSSCG00000003791	SRSF11	10.3219	2.39292	4.96343e-07	7.92875	8	0	4	4	2	0	0	2	Inactive	Inactive	216.02	118.29	0.981001	2.96863e-06
higher RPS in liver	6	144944249	ENSSSCG00000037066	GADD45A	38.5425	24.582	2.67112e-09	13.96	26	0	11	15	17	0	8	9	Active	Active	78.75	38.08	0.956297	0.00243339
higher RPS in liver	6	145814231	ENSSSCG00000031352	TCTEX1D1	3.67405	0	6.33566e-08	3.66875	3	0	0	3	0	0	0	0	Active	Active	0.49	1.02	-0.664108	0.0645394
higher RPS in liver	6	149845831	ENSSSCG00000003819	ANGPTL3	8.12426	0	1.74445e-09	8.12	6	0	6	0	0	0	0	0	Active	Inactive	770.29	0.37	10.9259	1.50943e-120
higher RPS in liver	6	151236883	ENSSSCG00000033042	Unknown	14.703	7.23687	3.52447e-07	7.4675	12	4	1	7	5	0	1	4	Inactive	Inactive	0.23	0	-	-
higher RPS in liver	6	155530472	ENSSSCG00000003835	C8A	10.1328	0	1.04515e-06	10.1263	8	0	1	7	0	0	0	0	Active	Inactive	1470.76	0.19	13.0263	6.78787e-27
higher RPS in liver	6	155477131	ENSSSCG00000038041	FYB2	6.93366	0	1.02699e-08	6.93	5	0	2	3	0	0	0	0	Inactive	Inactive	16.46	0.05	9.59677	4.30545e-28
higher RPS in liver	6	155801012	ENSSSCG00000003839	PLPP3	30.026	23.4948	1.0764e-06	6.53	22	12	0	10	17	3	1	13	Active	Active	144.42	202.51	-0.44019	0.01804
higher RPS in liver	6	157552413	ENSSSCG00000027362	LEXM	14.6742	5.68951	1.22063e-08	8.985	10	0	0	10	4	0	2	2	Inactive	Inactive	0.83	0.84	0.297095	0.562657
higher RPS in liver	6	158338122	ENSSSCG00000029698	LRRC42	15.0742	10.7336	4.39402e-08	4.34	10	0	8	2	7	0	0	7	Active	Active	66.39	102.31	-0.618502	2.22659e-06
higher RPS in liver	6	158338610	ENSSSCG00000026264	HSPB11	15.0742	10.7336	4.39402e-08	4.34	10	0	8	2	7	0	0	7	Active	Active	45.46	30.96	0.728822	0.00217698
higher RPS in liver	6	158338653	ENSSSCG00000028506	YIPF1	15.0742	10.7336	4.39402e-08	4.34	10	0	8	2	7	0	0	7	Active	Active	48.61	21.31	1.16367	9.6658e-10
higher RPS in liver	6	158905460	ENSSSCG00000003848	LRP8	5.4525	0	2.39238e-09	5.4475	4	0	0	4	0	0	0	0	Active	Active	1.11	1.71	-0.286673	0.405657
higher RPS in liver	6	159061327	ENSSSCG00000003851	CPT2	10.6187	1.4311	7.35713e-08	9.1875	8	5	0	3	1	0	0	1	Active	Active	142.83	173.06	-0.252221	0.33974
higher RPS in liver	6	163447854	ENSSSCG00000003882	SLC5A9	4.42724	0	1.21428e-06	4.42375	4	0	0	4	0	0	0	0	Active	Inactive	1.01	0.04	4.68942	3.15399e-05
higher RPS in liver	6	164114099	ENSSSCG00000034880	FOXD2	9.83399	2.77085	4.40515e-09	7.06375	7	0	0	7	2	0	0	2	Active	Active	0.49	0.63	-0.185739	0.750321
higher RPS in liver	6	164133011	ENSSSCG00000003884	FOXE3	5.98823	1.25541	1.0453e-06	4.735	5	0	0	5	1	0	0	1	Active	Active	0.01	0	-	-
higher RPS in liver	6	164315287	ENSSSCG00000020872	PDZK1IP1	6.6717	2.75487	2.27545e-08	3.9175	5	0	0	5	2	0	0	2	Active	Active	60.1	1.76	3.86695	3.48239e-14
higher RPS in liver	6	164484185	ENSSSCG00000003892	Unknown	17.0397	11.0847	0.000582279	5.955	14	0	6	8	9	0	0	9	Inactive	Inactive	7.62	0.05	9.40942	0.0105335
higher RPS in liver	6	164496805	ENSSSCG00000003891	CYP4A24	43.5903	34.9627	0.000194095	8.6275	27	0	8	19	23	0	2	21	Active	Active	149.97	0.11	10.421	2.18489e-19
higher RPS in liver	6	164646254	ENSSSCG00000003889	Unknown	26.2995	12.5908	0.00441488	13.7088	34	0	7	27	20	0	3	17	Active	Inactive	5.95	0	9.94458	3.60875e-06
higher RPS in liver	6	164777980	ENSSSCG00000003895	EFCAB14	9.4023	3.72485	4.35747e-07	5.6775	7	0	1	6	3	0	0	3	Active	Active	29.15	42.57	-0.518158	0.000554551
higher RPS in liver	6	166012377	ENSSSCG00000003918	TOE1	12.1329	2.8758	3.2491e-08	9.2575	9	0	1	8	2	0	1	1	Active	Active	12.54	12.17	0.158837	0.308559
higher RPS in liver	6	167358674	ENSSSCG00000034778	ARTN	16.6778	13.0302	8.62862e-07	3.64875	11	0	1	10	8	0	1	7	Active	Active	0.41	0.05	-	-
higher RPS in liver	6	167809093	ENSSSCG00000003940	HYI	5.39505	0	3.37283e-09	5.38875	4	0	0	4	0	0	0	0	Active	Active	202.53	14.86	3.59459	1.18165e-25
higher RPS in liver	6	167861307	ENSSSCG00000003941	SZT2	14.7571	11.1462	5.37454e-06	3.6125	10	0	0	10	7	0	0	7	Active	Active	4.8	14.8	-1.61056	1.30491e-08
higher RPS in liver	6	167860983	ENSSSCG00000003943	MED8	14.7571	11.1462	5.37454e-06	3.6125	10	0	0	10	7	0	0	7	Active	Active	307.21	110.21	1.53513	4.83102e-18
higher RPS in liver	6	167881352	ENSSSCG00000035238	ELOVL1	14.413	10.9222	1.60568e-06	3.4925	10	0	0	10	8	0	0	8	Active	Active	55.86	39.75	0.512581	0.0597447
higher RPS in liver	6	167890583	ENSSSCG00000003949	CDC20	8.91558	5.90314	1.24188e-07	3.0125	6	0	0	6	4	0	0	4	Active	Active	53.39	8.63	2.39837	0.00652512
higher RPS in liver	6	167908560	ENSSSCG00000030906	MPL	5.45527	2.36789	0.000227487	3.0875	4	0	0	4	2	0	0	2	Inactive	Active	0.17	0.06	-	-
higher RPS in liver	6	167960094	ENSSSCG00000003951	C1ORF210	12.3984	2.7463	1.64448e-08	9.6525	9	0	4	5	2	0	0	2	Active	Active	42.77	0.92	5.34979	1.90699e-35
higher RPS in liver	6	167976378	ENSSSCG00000024697	TMEM125	17.8779	6.09268	5.54534e-08	11.7875	13	0	5	8	5	0	0	5	Active	Inactive	7.52	0.09	6.90931	2.85763e-22
higher RPS in liver	6	168596352	ENSSSCG00000040559	ZNF691	9.72639	1.30822	2.35545e-08	8.4175	7	0	0	7	1	0	1	0	Active	Active	3.01	6.04	-0.92332	6.53293e-07
higher RPS in liver	6	170701744	ENSSSCG00000003981	ZFP69B	8.00897	0	3.76229e-07	8.005	6	0	0	6	0	0	0	0	Active	Active	17.59	28.36	-0.498838	0.0113288
higher RPS in liver	6	170763820	ENSSSCG00000003983	SMAP2	5.47481	0	8.87101e-11	5.46875	3	0	0	3	0	0	0	0	Active	Active	50.79	25.51	0.967594	1.15339e-09
higher RPS in liver	2	505005	ENSSSCG00000012843	PIDD1	5.79067	0	3.00909e-10	5.78625	4	0	0	4	0	0	0	0	Active	Active	2.34	3.07	-0.345885	0.350236
higher RPS in liver	2	513076	ENSSSCG00000012841	PNPLA2	7.70205	2.30285	5.17393e-08	5.40375	5	0	0	5	2	0	0	2	Active	Active	13.84	79.45	-2.8405	1.95023e-24
higher RPS in liver	2	518544	ENSSSCG00000023933	CRACR2B	9.88263	3.39468	1.71702e-05	6.48625	8	0	0	8	3	0	0	3	Active	Active	1.83	0.57	1.55866	0.000230261
higher RPS in liver	2	525043	ENSSSCG00000012840	CD151	7.56015	1.03139	4.3915e-08	6.5275	5	0	0	5	1	0	0	1	Active	Active	46.17	177	-2.03745	2.41564e-15
higher RPS in liver	2	2503181	ENSSSCG00000033043	SHANK2	10.157	0	1.73677e-09	10.1525	7	1	1	5	0	0	0	0	Active	Active	10.1	0.16	6.08033	1.68654e-83
higher RPS in liver	2	3373411	ENSSSCG00000024158	ANO1	7.02861	0	3.21046e-09	7.0225	5	0	1	4	0	0	0	0	Active	Inactive	16.36	12.37	0.310469	0.336555
higher RPS in liver	2	3583027	ENSSSCG00000012871	FGF19	15.432	8.53522	1.47386e-05	6.8975	12	0	0	12	6	0	0	6	Active	Active	0.01	0.01	-	-
higher RPS in liver	2	7167329	ENSSSCG00000034387	ARL2-SNX15	6.06608	1.29935	6.98009e-05	4.765	5	0	2	3	1	0	0	1	Active	Active	64.92	206.17	-1.6114	3.10678e-15
higher RPS in liver	2	7256427	ENSSSCG00000013016	PPP2R5B	6.74414	1.29694	4.79272e-07	5.44625	5	0	1	4	1	0	0	1	Active	Active	11.75	29.64	-1.42587	2.1379e-10
higher RPS in liver	2	7261756	ENSSSCG00000023890	ATG2A	6.41729	0	1.96821e-06	6.4125	5	0	1	4	0	0	0	0	Active	Active	8.03	11.76	-0.848595	0.000534996
higher RPS in liver	2	7328233	ENSSSCG00000013018	CDC42BPG	24.0982	11.7382	7.76598e-09	12.3575	16	0	4	12	6	0	0	6	Active	Active	0.82	0.91	-0.296672	0.422816
higher RPS in liver	2	7603116	ENSSSCG00000020831	SLC22A11	12.2522	6.07628	3.51911e-07	6.17625	8	0	1	7	4	0	0	4	Inactive	Active	0.01	0	-	-
higher RPS in liver	2	7813836	ENSSSCG00000013028	ESRRA	11.1637	7.44222	5.22097e-05	3.72125	8	0	1	7	5	0	0	5	Active	Active	135.9	177.63	-0.403834	0.112583
higher RPS in liver	2	7915610	ENSSSCG00000013041	FERMT3	7.60126	3.92659	4.06648e-07	3.67375	6	0	0	6	3	0	0	3	Inactive	Active	19.4	6.7	1.60497	9.132e-08
higher RPS in liver	2	8146619	ENSSSCG00000013049	RCOR2	5.93509	1.61732	8.29034e-09	4.31625	4	0	0	4	1	0	0	1	Active	Active	1.07	12.61	-3.67352	2.23641e-15
higher RPS in liver	2	8716595	ENSSSCG00000028537	SLC22A10	27.7944	20.8053	9.52901e-06	6.98875	22	7	5	10	15	0	0	15	Inactive	Inactive	142.18	0.47	8.31365	2.03293e-155
higher RPS in liver	2	8574604	ENSSSCG00000013057	SLC22A9	21.4633	0	4.58858e-11	21.4575	14	5	1	8	0	0	0	0	Active	Inactive	105.27	0.48	7.68323	5.76358e-115
higher RPS in liver	2	8534160	ENSSSCG00000027453	SLC22A9	6.63799	0	7.06128e-08	6.6325	5	0	0	5	0	0	0	0	Inactive	Inactive	1.73	0	6.76765	1.32946e-06
higher RPS in liver	2	8750831	ENSSSCG00000025413	SLC22A10	41.7868	1.19794	3.01949e-11	40.5875	29	17	2	10	1	0	0	1	Active	Inactive	294.36	0.07	13.0407	1.69906e-66
higher RPS in liver	2	8919072	ENSSSCG00000022404	SLC3A2	15.2209	9.75628	2.38213e-07	5.465	10	0	1	9	6	0	0	6	Active	Active	62.97	485.59	-2.83059	2.59099e-13
higher RPS in liver	2	9000122	ENSSSCG00000020665	TAF6L	9.47983	4.07661	9.44069e-07	5.40125	7	0	2	5	3	0	0	3	Active	Active	8.64	10.53	-0.303264	0.167123
higher RPS in liver	2	9052070	ENSSSCG00000020823	BSCL2	8.31515	4.18667	1.97126e-08	4.13	6	0	2	4	3	0	0	3	Active	Active	11.72	51.37	-2.15736	5.98089e-17
higher RPS in liver	2	9054963	ENSSSCG00000032197	GNG3	8.31515	4.18667	1.97126e-08	4.13	6	0	2	4	3	0	0	3	Inactive	Active	0.61	0.45	0.72741	0.13527
higher RPS in liver	2	9148560	ENSSSCG00000013063	TUT1	16.4173	12.9828	2.85016e-06	3.43375	11	0	3	8	8	0	0	8	Active	Active	13.42	23.8	-0.837216	0.00418134
higher RPS in liver	2	10289742	ENSSSCG00000013091	Unknown	22.7891	14.8714	0.000402053	7.91625	16	0	0	16	11	0	0	11	Active	Active	0.05	0	-	-
higher RPS in liver	2	10582777	ENSSSCG00000029938	Unknown	8.65937	5.62363	5.58723e-05	3.035	5	0	0	5	4	0	0	4	Active	Active	0.2	0.02	-	-
higher RPS in liver	2	10906119	ENSSSCG00000013105	CCDC86	3.20419	0	1.4262e-10	3.2	2	0	0	2	0	0	0	0	Active	Active	8.13	16.51	-0.901948	0.0121021
higher RPS in liver	2	10969359	ENSSSCG00000034847	MS4A15	6.47375	2.97597	8.35411e-08	3.4975	4	0	0	4	2	0	0	2	Inactive	Inactive	0.05	0	-	-
higher RPS in liver	2	12260985	ENSSSCG00000033703	FAM111A	7.30431	2.80041	1.4603e-09	4.50375	5	0	3	2	2	0	0	2	Active	Active	31.1	22.62	0.532774	0.104165
higher RPS in liver	2	12279560	ENSSSCG00000013147	FAM111B	11.0258	2.12546	7.65316e-08	8.9	8	0	4	4	2	0	0	2	Active	Active	33.95	11.79	1.6649	6.78544e-05
higher RPS in liver	2	12279731	ENSSSCG00000013148	GLYATL2	11.0258	2.12546	7.65316e-08	8.9	8	0	4	4	2	0	0	2	Active	Active	1.43	0.79	0.852679	0.150183
higher RPS in liver	2	12365195	ENSSSCG00000040088	Unknown	5.1185	0.989314	2.80115e-05	4.1275	4	0	3	1	1	0	0	1	Active	Inactive	573.54	0.39	10.7172	5.01605e-141
higher RPS in liver	2	12472747	ENSSSCG00000042844	MPEG1	9.16805	1.41264	2.9496e-10	7.75625	6	0	1	5	1	0	0	1	Inactive	Inactive	0.49	0	-	-
higher RPS in liver	2	12477381	ENSSSCG00000013151	GLRX	8.79438	0	7.12032e-11	8.78875	6	0	1	5	0	0	0	0	Inactive	Inactive	0.19	4.86	-3.99714	0.0269269
higher RPS in liver	2	13354013	ENSSSCG00000023379	UBE2L6	11.45	8.28781	6.95245e-05	3.1625	8	0	1	7	6	0	0	6	Active	Active	29.3	36.67	-0.208275	0.703538
higher RPS in liver	2	13459207	ENSSSCG00000040919	RTN4RL2	7.36652	3.98108	0.00120471	3.385	7	0	2	5	3	0	0	3	Active	Active	1.1	4.79	-2.25875	0.000131273
higher RPS in liver	2	13525538	ENSSSCG00000027553	PRG3	17.3335	12.7257	0.000140364	4.60875	13	0	0	13	9	0	0	9	Active	Inactive	442.86	1.86	8.11622	1.41349e-22
higher RPS in liver	2	13525538	ENSSSCG00000031326	PRG3	17.3335	12.7257	0.000140364	4.60875	13	0	0	13	9	0	0	9	Active	Inactive	42.3	0.17	9.19646	1.02364e-19
higher RPS in liver	2	13556104	ENSSSCG00000051375	AP000781.2	3.63681	0.529592	4.91219e-06	3.10625	4	0	1	3	1	0	0	1	Inactive	Inactive	0.11	0	-	-
higher RPS in liver	2	13879994	ENSSSCG00000013194	OR5AK2	26.5807	22.1075	0.0113689	4.47375	19	0	1	18	15	0	0	15	Inactive	Inactive	0	0.13	-	-
higher RPS in liver	2	13918904	ENSSSCG00000050774	Unknown	11.8213	7.29293	0.00746097	4.5275	12	0	2	10	7	0	0	7	Inactive	Inactive	0.73	1.26	-0.692399	0.0309833
higher RPS in liver	2	13982778	ENSSSCG00000042449	Unknown	7.9334	1.23663	4.01577e-06	6.69625	10	0	0	10	2	0	0	2	Inactive	Inactive	0.01	0	-	-
higher RPS in liver	2	14001255	ENSSSCG00000045001	Unknown	3.99787	0.585615	0.00693348	3.41	5	0	0	5	1	0	0	1	Inactive	Inactive	0	0	-	-
higher RPS in liver	2	14096838	ENSSSCG00000033331	Unknown	15.2475	7.04617	0.000499386	8.20125	20	0	0	20	13	0	0	13	Inactive	Inactive	0.02	0	-	-
higher RPS in liver	2	14191168	ENSSSCG00000050639	OR4C11	5.4585	1.76982	0.00134908	3.69	6	0	0	6	2	0	0	2	Inactive	Inactive	0	0	-	-
higher RPS in liver	2	14726715	ENSSSCG00000023709	PTPRJ	13.4733	2.76231	1.40039e-06	10.7137	10	4	1	5	2	0	0	2	Inactive	Inactive	40.25	12.96	1.72437	5.92932e-15
higher RPS in liver	2	15606592	ENSSSCG00000013246	C11ORF49	26.803	23.183	0.00375697	3.61875	19	0	1	18	17	0	3	14	Active	Active	1.66	4.41	-1.22589	9.0903e-06
higher RPS in liver	2	17448200	ENSSSCG00000031819	TP53I11	22.1429	12.2513	1.02115e-08	9.89	15	0	1	14	8	0	5	3	Active	Active	18.86	23.93	-0.387114	0.265154
higher RPS in liver	2	21436392	ENSSSCG00000013286	LRRC4C	5.32239	0	4.97675e-10	5.3175	4	0	0	4	0	0	0	0	Inactive	Inactive	1.28	2.36	-0.639986	0.00791575
higher RPS in liver	2	26012151	ENSSSCG00000045027	Unknown	27.3753	18.0275	2.45306e-06	9.35	22	0	4	18	13	0	8	5	Inactive	Inactive	1.29	3.3	-1.11071	0.00422412
higher RPS in liver	2	26340312	ENSSSCG00000013300	EHF	5.3516	0	1.21642e-09	5.34625	4	0	3	1	0	0	0	0	Inactive	Inactive	13.16	0.55	4.79828	1.45228e-30
higher RPS in liver	2	27928823	ENSSSCG00000030326	TCP11L1	3.19415	0	2.8488e-09	3.18875	2	2	0	0	0	0	0	0	Active	Active	27.24	12.75	1.09428	1.32928e-12
higher RPS in liver	2	27928316	ENSSSCG00000042341	DEPDC7	3.19415	0	2.8488e-09	3.18875	2	2	0	0	0	0	0	0	Active	Active	202.99	1.11	7.59633	6.77924e-19
higher RPS in liver	2	38826726	ENSSSCG00000037705	SLC6A5	7.72099	0	1.43594e-07	7.71625	6	0	0	6	0	0	0	0	Active	Inactive	0.08	0.06	-	-
higher RPS in liver	2	39032916	ENSSSCG00000013347	PRMT3	5.50851	1.46687	6.47922e-11	4.04	4	0	0	4	1	0	0	1	Active	Active	15.62	17.84	-0.0893978	0.523002
higher RPS in liver	2	40944178	ENSSSCG00000045256	Unknown	10.9267	2.45288	6.84948e-10	8.47375	7	5	0	2	2	0	0	2	Inactive	Inactive	2.45	3.85	-0.421648	0.144005
higher RPS in liver	2	40962500	ENSSSCG00000013369	Unknown	3.93715	0	1.69553e-06	3.9325	3	3	0	0	0	0	0	0	Inactive	Inactive	104.01	0.14	10.8716	3.48564e-12
higher RPS in liver	2	41028692	ENSSSCG00000035393	SAAL1	11.9116	1.10607	3.35223e-09	10.8063	8	5	0	3	1	0	0	1	Active	Active	90.93	22.29	1.93966	1.70797e-17
higher RPS in liver	2	41114168	ENSSSCG00000042767	SERGEF	5.55922	0	2.75436e-09	5.555	4	2	0	2	0	0	0	0	Active	Active	12.9	7.19	0.807501	0.00940421
higher RPS in liver	2	42030447	ENSSSCG00000013381	RPS13	3.99221	0	6.95654e-09	3.98625	3	0	0	3	0	0	0	0	Active	Active	2340.85	2963.26	-0.349965	0.0331666
higher RPS in liver	2	42032090	ENSSSCG00000051366	Unknown	3.99221	0	6.95654e-09	3.98625	3	0	0	3	0	0	0	0	Active	Active	1.9	3.17	-0.639167	0.044908
higher RPS in liver	2	42364521	ENSSSCG00000040570	C11ORF58	3.90795	0	0.000498754	3.9025	4	0	2	2	0	0	0	0	Active	Active	75.92	73.14	0.222556	0.296492
higher RPS in liver	2	44614028	ENSSSCG00000013388	PDE3B	17.4017	1.28319	7.11041e-07	16.1187	13	0	4	9	1	0	1	0	Active	Active	56.9	8.5	2.7717	3.2248e-42
higher RPS in liver	2	44552460	ENSSSCG00000044539	Unknown	3.25349	0	0.000963725	3.24875	3	0	0	3	0	0	0	0	Inactive	Inactive	0.63	0.69	0.19671	0.593698
higher RPS in liver	2	44761013	ENSSSCG00000013392	COPB1	11.4664	3.90014	2.0503e-07	7.57	9	0	4	5	3	0	1	2	Active	Active	433.25	148.96	1.57052	9.11987e-11
higher RPS in liver	2	47302012	ENSSSCG00000031706	Unknown	10.7916	2.50364	1.80019e-09	8.2875	8	8	0	0	2	0	0	2	Active	Active	1.67	0.65	1.32946	1.2213e-08
higher RPS in liver	2	47302117	ENSSSCG00000013400	MICAL2	10.7916	2.50364	1.80019e-09	8.2875	8	8	0	0	2	0	0	2	Active	Active	16.61	10.1	0.710905	0.0216992
higher RPS in liver	2	47582814	ENSSSCG00000013402	USP47	5.67308	1.30655	1.58135e-07	4.36625	4	0	0	4	1	0	0	1	Active	Active	99.53	258.08	-1.20889	6.15337e-08
higher RPS in liver	2	49242734	ENSSSCG00000013409	SBF2	8.51669	0	1.93412e-10	8.5125	6	0	2	4	0	0	0	0	Active	Active	31.51	35.86	-0.0474453	0.679905
higher RPS in liver	2	50441971	ENSSSCG00000036276	PSMB5	5.60967	0	0.00134552	5.60375	6	0	0	6	0	0	0	0	Inactive	Inactive	0.05	0	-	-
higher RPS in liver	2	51219667	ENSSSCG00000013992	ARF1	5.69163	1.37719	1.5764e-07	4.3125	4	0	0	4	1	0	0	1	Active	Active	1005.8	880.73	0.22669	0.247294
higher RPS in liver	2	53142040	ENSSSCG00000045400	OR2T11	7.15058	2.88478	0.000162759	4.265	7	0	0	7	3	0	0	3	Inactive	Inactive	0	0	-	-
higher RPS in liver	2	53514632	ENSSSCG00000036085	Unknown	8.91276	5.82948	1.37489e-05	3.0825	6	0	0	6	4	0	0	4	Inactive	Inactive	0.06	0	-	-
higher RPS in liver	2	54460667	ENSSSCG00000033545	OR2T35	5.6899	1.56294	0.00669136	4.12375	7	0	0	7	2	0	0	2	Inactive	Inactive	0.02	0	-	-
higher RPS in liver	2	56614032	ENSSSCG00000045699	Unknown	8.92115	5.21668	2.85959e-05	3.705	6	0	0	6	3	0	0	3	Inactive	Inactive	0.31	0.36	-	-
higher RPS in liver	2	56826890	ENSSSCG00000045107	Unknown	13.3652	4.87246	1.86811e-05	8.49375	21	0	0	21	6	0	0	6	Inactive	Inactive	0.24	1.29	-1.9617	0.187492
higher RPS in liver	2	57689592	ENSSSCG00000049548	Unknown	30.3874	14.3323	0.000776985	16.0538	48	0	2	46	25	0	0	25	Inactive	Inactive	0.02	0	-	-
higher RPS in liver	2	57848414	ENSSSCG00000014539	ZFP62	11.4793	7.19029	1.12311e-06	4.29	8	0	3	5	5	0	0	5	Active	Active	22.21	29	-0.2664	0.0760483
higher RPS in liver	2	61917929	ENSSSCG00000027013	CYP4F8	20.3032	16.7886	0.00252148	3.51375	18	0	1	17	13	0	0	13	Inactive	Inactive	3.54	11.65	-1.75771	3.49722e-08
higher RPS in liver	2	62155428	ENSSSCG00000013836	WIZ	4.1256	0.481686	6.04511e-05	3.63875	4	0	0	4	1	0	0	1	Active	Active	2.94	7.53	-1.32586	0.00010416
higher RPS in liver	2	62155437	ENSSSCG00000013838	AKAP8L	4.1256	0.481686	6.04511e-05	3.63875	4	0	0	4	1	0	0	1	Active	Active	47.67	52.58	-0.136264	0.435637
higher RPS in liver	2	63489573	ENSSSCG00000046717	Unknown	5.34219	1.55126	5.5194e-05	3.79125	4	0	0	4	1	0	0	1	Inactive	Inactive	0	0	-	-
higher RPS in liver	2	63655588	ENSSSCG00000035905	Unknown	26.5048	22.7438	0.0420354	3.75875	19	0	0	19	17	0	0	17	Inactive	Inactive	0.07	0	-	-
higher RPS in liver	2	64012901	ENSSSCG00000036221	Unknown	8.36031	4.896	0.000327585	3.46125	7	0	0	7	3	0	0	3	Inactive	Inactive	0	0	-	-
higher RPS in liver	2	64571618	ENSSSCG00000021675	Unknown	6.53639	3.30811	6.38521e-05	3.2275	6	0	1	5	2	0	0	2	Inactive	Inactive	1.52	1.22	0.477502	0.116095
higher RPS in liver	2	64623281	ENSSSCG00000013787	ADGRE3	8.47512	0	3.35692e-06	8.47	7	0	2	5	0	0	0	0	Inactive	Inactive	2.52	0.26	3.43402	3.00738e-08
higher RPS in liver	2	66466187	ENSSSCG00000029347	Unknown	4.80471	1.3756	0.00418027	3.42625	5	0	0	5	2	0	0	2	Active	Active	53.41	2.7	4.4471	7.71328e-60
higher RPS in liver	2	66603853	ENSSSCG00000021757	ZNF14	6.38987	2.67691	0.000247164	3.715	5	0	0	5	3	0	0	3	Inactive	Inactive	12.16	5.45	1.1641	6.88041e-05
higher RPS in liver	2	66890769	ENSSSCG00000035663	Unknown	11.5744	6.56306	2.10192e-06	5.0125	8	0	0	8	5	0	0	5	Active	Active	11.53	7.93	0.61517	0.000203491
higher RPS in liver	2	67156310	ENSSSCG00000046903	OR7G2	3.61213	0	6.09828e-06	3.60625	3	0	0	3	0	0	0	0	Inactive	Inactive	0.03	0	-	-
higher RPS in liver	2	67447202	ENSSSCG00000048166	Unknown	8.899	0.382491	0.000801561	8.5125	10	0	0	10	1	0	0	1	Inactive	Inactive	0	0	-	-
higher RPS in liver	2	67462553	ENSSSCG00000046880	Unknown	7.62495	3.488	0.00425488	4.135	9	0	0	9	4	0	0	4	Inactive	Inactive	0	0	-	-
higher RPS in liver	2	67480534	ENSSSCG00000046242	Unknown	11.6004	7.16562	0.00164468	4.4325	13	0	0	13	10	0	1	9	Inactive	Inactive	0	0	-	-
higher RPS in liver	2	67595222	ENSSSCG00000044726	OR7E24	6.00474	2.60263	0.0101905	3.40125	6	0	0	6	3	0	0	3	Active	Active	0.03	0	-	-
higher RPS in liver	2	68148843	ENSSSCG00000044142	Unknown	19.1597	13.3481	0.00010978	5.8125	11	0	0	11	7	0	0	7	Inactive	Inactive	0.04	0	-	-
higher RPS in liver	2	69337110	ENSSSCG00000013644	KRI1	4.6957	1.51853	1.28344e-08	3.17875	3	0	0	3	1	0	0	1	Active	Active	13.21	21.13	-0.550977	0.00184325
higher RPS in liver	2	69339999	ENSSSCG00000013643	CDKN2D	4.6957	1.51853	1.28344e-08	3.17875	3	0	0	3	1	0	0	1	Active	Active	36.09	20.52	0.649466	0.224571
higher RPS in liver	2	69474031	ENSSSCG00000013630	DNM2	11.1885	7.85086	1.06707e-06	3.3375	7	4	0	3	5	0	0	5	Active	Active	52.59	51.28	0.0224641	0.910675
higher RPS in liver	2	69662238	ENSSSCG00000013629	SMARCA4	5.92259	1.22739	1.47611e-07	4.695	5	0	0	5	1	0	0	1	Inactive	Inactive	23.75	37.21	-0.558394	0.0109231
higher RPS in liver	2	70060193	ENSSSCG00000037146	SWSAP1	4.08254	0	6.3079e-07	4.0775	3	0	0	3	0	0	0	0	Active	Active	22.06	19.57	0.289569	0.128307
higher RPS in liver	2	70545688	ENSSSCG00000013609	Unknown	4.98664	0	6.95551e-10	4.98	4	0	0	4	0	0	0	0	Inactive	Inactive	0.03	0.16	-	-
higher RPS in liver	2	70697866	ENSSSCG00000046561	NFILZ	9.45007	4.06339	3.40315e-12	5.38625	7	0	0	7	3	0	0	3	Inactive	Inactive	0.08	0.02	-	-
higher RPS in liver	2	71102053	ENSSSCG00000013594	FBN3	15.0953	8.3742	6.34091e-09	6.7225	10	4	0	6	6	0	0	6	Active	Active	0.03	3.2	-6.43127	3.03255e-60
higher RPS in liver	2	71433419	ENSSSCG00000039007	CLEC4G	3.98702	0	1.62979e-09	3.98125	3	0	0	3	0	0	0	0	Active	Inactive	229.99	0.13	12.0077	1.11715e-54
higher RPS in liver	2	71453824	ENSSSCG00000040377	FCER2	13.995	0	7.31439e-10	13.99	10	0	1	9	0	0	0	0	Inactive	Inactive	0.07	0.04	-	-
higher RPS in liver	2	71472549	ENSSSCG00000013573	TRAPPC5	14.8087	6.30775	2.51673e-07	8.5025	9	0	1	8	5	0	2	3	Active	Active	198.66	185.2	-0.102513	0.719959
higher RPS in liver	2	71471616	ENSSSCG00000037188	PCP2	14.8087	6.30775	2.51673e-07	8.5025	9	0	1	8	5	0	2	3	Active	Active	0.64	0.02	4.96963	0.000607492
higher RPS in liver	2	71476309	ENSSSCG00000033183	MCEMP1	11.1724	2.81518	1.29946e-10	8.35375	7	0	1	6	2	0	2	0	Inactive	Inactive	7.41	0.32	5.05511	2.37875e-13
higher RPS in liver	2	71485616	ENSSSCG00000013575	RETN	8.482	0.445891	7.17396e-08	8.0325	6	0	1	5	1	0	0	1	Inactive	Active	142.32	0.94	7.55436	9.3385e-07
higher RPS in liver	2	71957473	ENSSSCG00000033635	Unknown	21.0804	17.3157	4.54163e-05	3.765	13	0	0	13	12	0	0	12	Inactive	Active	0.11	0.09	-	-
higher RPS in liver	2	71966568	ENSSSCG00000013559	MBD3L3	16.5191	11.2245	6.57996e-05	5.29625	15	0	1	14	10	0	0	10	Inactive	Inactive	0.08	0.03	-	-
higher RPS in liver	2	72038204	ENSSSCG00000040926	Unknown	13.4572	8.22963	0.000791705	5.2275	11	0	0	11	6	0	0	6	Inactive	Inactive	0	0.08	-	-
higher RPS in liver	2	72060213	ENSSSCG00000046190	Unknown	10.1509	7.05817	0.0306676	3.09625	9	0	0	9	7	0	0	7	Active	Active	0.07	0	-	-
higher RPS in liver	2	72391648	ENSSSCG00000013553	VAV1	15.8396	3.81	7.04425e-08	12.0337	12	0	0	12	3	0	0	3	Active	Active	17.64	7.01	1.41818	8.40718e-07
higher RPS in liver	2	72394263	ENSSSCG00000022380	SH2D3A	15.8396	3.81	7.04425e-08	12.0337	12	0	0	12	3	0	0	3	Active	Active	0.28	0.1	-	-
higher RPS in liver	2	72416138	ENSSSCG00000013554	TRIP10	8.00273	0	2.58342e-09	7.99625	6	0	0	6	0	0	0	0	Active	Active	13.7	113.53	-3.01188	7.50844e-74
higher RPS in liver	2	72418261	ENSSSCG00000013552	GPR108	8.00273	0	2.58342e-09	7.99625	6	0	0	6	0	0	0	0	Active	Active	15.64	14.07	0.164603	0.373411
higher RPS in liver	2	72473477	ENSSSCG00000026695	TNFSF14	4.01085	0.489741	0.00248504	3.51875	4	0	0	4	1	0	0	1	Inactive	Inactive	10.15	0.53	4.42057	1.29665e-28
higher RPS in liver	2	72500463	ENSSSCG00000024275	Unknown	7.0583	0.438863	5.18338e-07	6.6175	6	0	0	6	1	0	0	1	Inactive	Inactive	0.3	0.09	-	-
higher RPS in liver	2	72582745	ENSSSCG00000022370	TNFSF9	16.0872	0.536159	1.88017e-07	15.55	14	0	0	14	1	0	0	1	Active	Active	4.79	3.04	0.689331	0.000712453
higher RPS in liver	2	72599706	ENSSSCG00000013545	TUBB4A	8.26897	0	4.26334e-07	8.2625	7	0	1	6	0	0	0	0	Active	Active	0.57	2.06	-1.74209	3.05327e-06
higher RPS in liver	2	72610566	ENSSSCG00000013546	DENND1C	3.0564	0	4.8601e-05	3.0525	3	0	0	3	0	0	0	0	Active	Inactive	2.44	2.09	0.125204	0.7103
higher RPS in liver	2	72780947	ENSSSCG00000013534	MLLT1	6.90295	2.90825	4.39198e-05	3.99375	5	4	0	1	2	0	0	2	Active	Active	10	20.67	-1.09063	1.24171e-05
higher RPS in liver	2	73266302	ENSSSCG00000013527	CATSPERD	3.33666	0	6.54051e-06	3.3325	3	1	0	2	0	0	0	0	Active	Active	0.09	0.01	-	-
higher RPS in liver	2	73266258	ENSSSCG00000027128	LONP1	3.33666	0	6.54051e-06	3.3325	3	1	0	2	0	0	0	0	Active	Active	86.74	106.53	-0.238014	0.293565
higher RPS in liver	2	73294713	ENSSSCG00000030546	HSD11B1L	4.38863	0	3.70399e-05	4.385	4	2	0	2	0	0	0	0	Active	Active	238.38	228.57	0.042982	0.836111
higher RPS in liver	2	73294842	ENSSSCG00000013524	MICOS13	4.38863	0	3.70399e-05	4.385	4	2	0	2	0	0	0	0	Active	Active	246.86	341.68	-0.455143	0.0115458
higher RPS in liver	2	74044983	ENSSSCG00000037153	FEM1A	14.4264	8.02986	1.3484e-06	6.3975	12	1	5	6	6	0	1	5	Active	Active	32.23	345.78	-3.48402	3.24581e-70
higher RPS in liver	2	74539583	ENSSSCG00000013498	EBI3	3.35759	0	1.38309e-05	3.35375	3	0	0	3	0	0	0	0	Active	Active	10.08	3.87	1.35631	5.73394e-05
higher RPS in liver	2	74564902	ENSSSCG00000013497	ANKRD24	11.7748	0	1.85636e-10	11.77	8	0	1	7	0	0	0	0	Inactive	Active	4.48	4.29	0.130165	0.616832
higher RPS in liver	2	74568436	ENSSSCG00000013496	SIRT6	9.03033	0	6.81899e-10	9.0275	6	0	1	5	0	0	0	0	Active	Active	10.89	23.83	-1.01751	0.000597966
higher RPS in liver	2	74729776	ENSSSCG00000022066	PIAS4	3.69936	0	1.84584e-07	3.69375	3	0	0	3	0	0	0	0	Active	Active	24.55	21.93	0.0753833	0.654587
higher RPS in liver	2	74729939	ENSSSCG00000050591	Unknown	3.69936	0	1.84584e-07	3.69375	3	0	0	3	0	0	0	0	Active	Active	3.17	3.02	0.0531476	0.858813
higher RPS in liver	2	74747080	ENSSSCG00000025675	EEF2	5.01668	1.20711	1.39938e-06	3.81125	4	0	0	4	1	0	0	1	Active	Active	1489.29	2917.46	-0.974965	6.68467e-06
higher RPS in liver	2	75176818	ENSSSCG00000049629	AC005551.1	25.5359	22.4945	1.08057e-07	3.04125	15	0	4	11	13	0	0	13	Inactive	Active	0.04	0.04	-	-
higher RPS in liver	2	75178462	ENSSSCG00000038067	SMIM24	25.5359	22.4945	1.08057e-07	3.04125	15	0	4	11	13	0	0	13	Inactive	Active	0.53	0.07	3.55089	0.000393734
higher RPS in liver	2	75836442	ENSSSCG00000013469	ZNF555	13.7411	9.24179	7.11166e-06	4.5	10	0	0	10	7	0	0	7	Active	Active	6.83	2.5	1.58183	5.72984e-20
higher RPS in liver	2	75845552	ENSSSCG00000038635	ZNF554	17.1676	10.4972	1.19785e-06	6.67125	12	0	0	12	7	0	0	7	Inactive	Inactive	0.07	0.75	-3.05552	0.00104451
higher RPS in liver	2	77038009	ENSSSCG00000023329	APC2	6.47514	2.45084	1.87671e-06	4.02375	4	0	2	2	2	0	0	2	Active	Active	0.1	0.07	-	-
higher RPS in liver	2	77222749	ENSSSCG00000035532	ATP5F1D	18.7863	7.87863	7.50918e-08	10.91	14	0	1	13	6	0	0	6	Active	Active	1109.96	2487.98	-1.19186	2.40112e-06
higher RPS in liver	2	77221171	ENSSSCG00000034339	CBARP	18.7863	7.87863	7.50918e-08	10.91	14	0	1	13	6	0	0	6	Active	Active	0.59	1.61	-1.51087	5.86469e-05
higher RPS in liver	2	77385600	ENSSSCG00000039542	CNN2	11.1091	7.83067	0.00188001	3.2775	9	0	2	7	6	0	0	6	Active	Active	33.85	53.49	-0.546624	0.0548053
higher RPS in liver	2	77393611	ENSSSCG00000027779	TMEM259	10.843	6.20041	1.56063e-06	4.64	8	0	2	6	5	0	0	5	Active	Active	106.61	155.96	-0.615762	0.003321
higher RPS in liver	2	77412136	ENSSSCG00000029635	GRIN3B	16.2089	12.3133	0.000250078	3.89625	12	0	2	10	9	0	0	9	Active	Active	0.1	0.08	-	-
higher RPS in liver	2	77423486	ENSSSCG00000013423	WDR18	24.8966	20.6134	0.000285552	4.28375	17	0	3	14	14	0	0	14	Active	Active	33.97	43.02	-0.295821	0.311726
higher RPS in liver	2	77479204	ENSSSCG00000013420	KISS1R	10.5504	5.91235	9.82506e-08	4.63875	7	0	1	6	4	0	0	4	Active	Active	0.22	0.11	-	-
higher RPS in liver	2	77477881	ENSSSCG00000013419	R3HDM4	10.5504	5.91235	9.82506e-08	4.63875	7	0	1	6	4	0	0	4	Inactive	Active	32.36	31.18	0.0162459	0.93895
higher RPS in liver	2	77490996	ENSSSCG00000013416	MED16	6.47119	2.69813	1.34271e-06	3.775	5	0	0	5	2	0	0	2	Active	Active	18.98	45.53	-1.23423	3.76976e-07
higher RPS in liver	2	77516027	ENSSSCG00000029130	ELANE	14.8953	10.7864	1.77792e-07	4.10875	9	0	1	8	6	0	0	6	Inactive	Active	44.82	0.11	9.97588	1.0646e-16
higher RPS in liver	2	80479460	ENSSSCG00000040706	DBN1	3.95083	0	5.62234e-07	3.94625	3	0	0	3	0	0	0	0	Inactive	Active	9.88	43.17	-2.08228	2.60526e-27
higher RPS in liver	2	80505430	ENSSSCG00000040698	PRR7	4.93019	0	4.37888e-09	4.92375	3	0	0	3	0	0	0	0	Active	Active	0.24	0.65	-2.0916	0.000768102
higher RPS in liver	2	80563321	ENSSSCG00000037535	SLC34A1	16.1974	12.0191	1.12305e-06	4.18	11	0	0	11	9	0	2	7	Inactive	Inactive	0.07	0.07	-	-
higher RPS in liver	2	80895588	ENSSSCG00000014046	ZNF346	16.6806	5.92825	5.28694e-11	10.7513	12	0	0	12	4	0	2	2	Active	Active	4.91	9.82	-0.858405	8.07199e-05
higher RPS in liver	2	80919244	ENSSSCG00000022508	UIMC1	9.89133	1.1217	2.57735e-08	8.77125	8	0	0	8	1	0	0	1	Active	Active	31.37	24.41	0.376272	0.101304
higher RPS in liver	2	81276564	ENSSSCG00000014051	TSPAN17	5.25618	0	2.33741e-09	5.25	4	0	0	4	0	0	0	0	Active	Active	44.64	48.86	-0.152652	0.535453
higher RPS in liver	2	82287158	ENSSSCG00000014066	TMEM171	4.11422	0	9.11723e-08	4.10875	3	0	0	3	0	0	0	0	Active	Active	13.05	0.11	8.01059	9.6613e-18
higher RPS in liver	2	82609248	ENSSSCG00000035878	FOXD1	10.6625	0	1.09844e-07	10.6562	8	0	0	8	0	0	0	0	Active	Active	0.05	1.57	-7.43923	4.54639e-10
higher RPS in liver	2	84320799	ENSSSCG00000014079	ANKRD31	11.9437	1.30599	1.8965e-10	10.6387	8	0	5	3	1	0	0	1	Active	Active	4.24	0.23	4.59413	3.96835e-33
higher RPS in liver	2	84380225	ENSSSCG00000014080	HMGCR	8.90075	0	5.49859e-14	8.895	6	0	0	6	0	0	0	0	Active	Active	75.53	50.84	0.795005	0.0774149
higher RPS in liver	2	84621342	ENSSSCG00000014083	ANKDD1B	12.1459	1.30019	3.06197e-08	10.8462	10	3	3	4	1	0	0	1	Active	Active	5.11	2.37	1.08088	3.57845e-07
higher RPS in liver	2	85294434	ENSSSCG00000014088	IQGAP2	33.8435	2.51779	4.10689e-14	31.3263	24	19	1	4	2	0	0	2	Active	Active	289.27	20.46	3.87935	8.48714e-59
higher RPS in liver	2	85767614	ENSSSCG00000014092	S100Z	7.11914	3.44184	1.60365e-07	3.67875	5	0	0	5	3	0	0	3	Inactive	Inactive	1.79	0.68	1.72845	0.00245908
higher RPS in liver	2	86537328	ENSSSCG00000014099	OTP	8.56537	0	5.88285e-09	8.56	6	0	0	6	0	0	0	0	Inactive	Inactive	0.03	0.02	-	-
higher RPS in liver	2	86665646	ENSSSCG00000014100	TBCA	4.05956	0	1.71536e-06	4.05625	4	0	1	3	0	0	0	0	Inactive	Active	261.84	74.99	1.84195	1.07419e-17
higher RPS in liver	2	87828552	ENSSSCG00000038535	ARSB	21.348	0	5.97282e-15	21.3425	13	5	5	3	0	0	0	0	Inactive	Inactive	43.52	13.61	1.6203	7.70179e-09
higher RPS in liver	2	87866856	ENSSSCG00000014110	DMGDH	4.89227	0	6.61299e-10	4.88625	3	1	0	2	0	0	0	0	Active	Inactive	371.96	0.77	8.8561	5.64247e-152
higher RPS in liver	2	87866607	ENSSSCG00000014108	BHMT	4.89227	0	6.61299e-10	4.88625	3	1	0	2	0	0	0	0	Active	Active	5473.15	2.11	11.4718	9.80731e-213
higher RPS in liver	2	91053069	ENSSSCG00000048155	Unknown	35.8735	24.1677	0.00775189	11.7063	70	0	1	69	43	2	0	41	Inactive	Inactive	0	0	-	-
higher RPS in liver	2	100447847	ENSSSCG00000014157	NR2F1	11.0799	2.67785	6.05231e-10	8.4	8	0	4	4	2	0	0	2	Active	Active	39.06	8.61	2.16518	2.96944e-16
higher RPS in liver	2	102591394	ENSSSCG00000014168	ELL2	5.29961	1.41335	7.37695e-09	3.88875	4	0	2	2	1	0	0	1	Active	Active	89.32	19.82	2.22039	8.51669e-29
higher RPS in liver	2	114675691	ENSSSCG00000022845	PJA2	6.09512	2.27505	7.60652e-07	3.81875	5	2	0	3	2	0	1	1	Active	Active	177.08	126.16	0.569291	0.00691428
higher RPS in liver	2	114675916	ENSSSCG00000014195	MAN2A1	6.09512	2.27505	7.60652e-07	3.81875	5	2	0	3	2	0	1	1	Active	Active	180.64	88.25	1.12062	2.64939e-05
higher RPS in liver	2	115832601	ENSSSCG00000014198	Unknown	8.91941	1.30222	9.42569e-09	7.6175	7	0	0	7	1	0	1	0	Active	Active	0.49	0.47	-	-
higher RPS in liver	2	115835104	ENSSSCG00000014199	WDR36	3.93464	0	1.09973e-08	3.93	3	0	0	3	0	0	0	0	Active	Active	53.31	55.34	0.0448758	0.806631
higher RPS in liver	2	117235472	ENSSSCG00000029860	EPB41L4A	31.5985	14.0223	4.29347e-08	17.5775	23	0	1	22	10	0	1	9	Active	Active	23.53	11.44	1.10309	4.81098e-07
higher RPS in liver	2	119804463	ENSSSCG00000038156	TMED7	11.9767	5.15521	5.84069e-08	6.8225	9	0	1	8	4	0	0	4	Active	Active	510	101.9	2.37973	3.36705e-25
higher RPS in liver	2	119965510	ENSSSCG00000033912	ATG12	5.65075	2.63415	1.69444e-08	3.01625	4	0	1	3	2	0	0	2	Active	Active	63.28	77.26	-0.235148	0.128481
higher RPS in liver	2	119965858	ENSSSCG00000037595	Unknown	5.65075	2.63415	1.69444e-08	3.01625	4	0	1	3	2	0	0	2	Active	Active	180.36	50.69	1.91431	1.47091e-13
higher RPS in liver	2	122210166	ENSSSCG00000051343	Unknown	32.9566	9.49304	2.70002e-05	23.46	53	0	0	53	15	0	1	14	Inactive	Inactive	0.53	0	7.04589	0.0184261
higher RPS in liver	2	126930483	ENSSSCG00000014239	CEP120	7.23396	0	1.09213e-07	7.22875	6	0	1	5	0	0	0	0	Active	Active	33.26	35.17	0.0472609	0.847574
higher RPS in liver	2	127017005	ENSSSCG00000014240	CSNK1G3	6.26785	0	3.2261e-08	6.26375	5	2	2	1	0	0	0	0	Active	Active	39.71	22.38	0.961801	2.97437e-07
higher RPS in liver	2	131857168	ENSSSCG00000014258	ISOC1	3.63128	0	2.76984e-07	3.62625	3	0	2	1	0	0	0	0	Active	Active	166.78	60.55	1.45592	1.33489e-10
higher RPS in liver	2	134358068	ENSSSCG00000036626	Unknown	5.99137	1.03686	3.20206e-09	4.95625	5	3	0	2	1	0	1	0	Inactive	Inactive	0.29	0.07	-	-
higher RPS in liver	2	134660927	ENSSSCG00000014280	RAD50	5.2269	0	9.41657e-08	5.2225	4	0	0	4	0	0	0	0	Active	Active	103.19	51.39	1.17702	3.44275e-06
higher RPS in liver	2	136299109	ENSSSCG00000032323	C5ORF15	6.02546	0	0.000146506	6.02	6	0	0	6	0	0	0	0	Active	Active	95.02	56.65	0.757752	0.000911003
higher RPS in liver	2	137766682	ENSSSCG00000014309	NEUROG1	3.26807	0	4.42434e-07	3.26375	3	0	0	3	0	0	0	0	Active	Active	0.06	0	-	-
higher RPS in liver	2	137812914	ENSSSCG00000014310	CXCL14	12.288	5.31911	7.96291e-08	6.96875	9	0	4	5	4	0	1	3	Active	Active	17.99	14.2	0.614406	0.0712237
higher RPS in liver	2	138191804	ENSSSCG00000014316	TGFBI	4.81084	0	1.76865e-07	4.805	4	0	2	2	0	0	0	0	Active	Active	137.56	204.18	-0.845057	0.00219266
higher RPS in liver	2	140504287	ENSSSCG00000014337	ETF1	3.45275	0	3.40035e-06	3.4475	3	0	0	3	0	0	0	0	Active	Active	93.15	88.42	0.183663	0.241119
higher RPS in liver	2	142472588	ENSSSCG00000029281	PCDHAC2	3.53456	0	2.242e-05	3.53	3	0	0	3	0	0	0	0	Active	Inactive	2.6	1.84	0.544442	0.0299832
higher RPS in liver	2	142475339	ENSSSCG00000039859	Unknown	5.79714	0	3.1023e-06	5.7925	5	0	0	5	0	0	0	0	Inactive	Inactive	0.05	0	-	-
higher RPS in liver	2	142482483	ENSSSCG00000048206	Unknown	3.55328	0	3.33796e-07	3.5475	3	0	0	3	0	0	0	0	Active	Inactive	0	0	-	-
higher RPS in liver	2	142488783	ENSSSCG00000042631	Unknown	4.08049	0	1.04228e-05	4.075	4	0	0	4	0	0	0	0	Inactive	Inactive	0.14	0	-	-
higher RPS in liver	2	142507806	ENSSSCG00000029442	PCDHA9	10.0955	0	1.05313e-07	10.09	9	0	0	9	0	0	0	0	Active	Inactive	0.06	0.13	-	-
higher RPS in liver	2	142520124	ENSSSCG00000037515	Unknown	6.57621	0	4.01338e-07	6.57125	6	0	0	6	0	0	0	0	Inactive	Inactive	0	0	-	-
higher RPS in liver	2	142527403	ENSSSCG00000046296	Unknown	11.3775	0	1.73293e-07	11.37	11	0	0	11	0	0	0	0	Inactive	Inactive	0.04	0	-	-
higher RPS in liver	2	142532894	ENSSSCG00000049531	Unknown	10.4967	0.999242	1.59746e-07	9.495	9	0	0	9	1	0	0	1	Active	Inactive	0	0	-	-
higher RPS in liver	2	142538379	ENSSSCG00000024998	PCDHA11	7.33579	0	2.87333e-06	7.33125	7	0	0	7	0	0	0	0	Inactive	Inactive	0.11	0.2	-	-
higher RPS in liver	2	142549516	ENSSSCG00000028030	PCDHA13	7.63381	1.03937	2.33338e-06	6.59375	7	0	0	7	1	0	0	1	Active	Inactive	0.05	0.14	-	-
higher RPS in liver	2	142818523	ENSSSCG00000036597	Unknown	9.29163	5.21784	0.0137224	4.075	12	0	0	12	7	0	0	7	Active	Inactive	0.7	0	0.724507	0.849457
higher RPS in liver	2	142817656	ENSSSCG00000040956	PCDHB4	9.29163	5.21784	0.0137224	4.075	12	0	0	12	7	0	0	7	Inactive	Active	1.9	13.35	-2.5714	3.78365e-20
higher RPS in liver	2	143036876	ENSSSCG00000023485	PCDHGB5	11.6039	7.80845	0.00039054	3.79625	10	0	1	9	6	0	0	6	Active	Active	3.9	18.88	-1.95436	8.93731e-09
higher RPS in liver	2	143046012	ENSSSCG00000031533	PCDHGB6	16.5354	9.82	2.27073e-08	6.71375	12	0	2	10	7	0	0	7	Active	Active	13.7	32.31	-1.04739	0.0032559
higher RPS in liver	2	143063817	ENSSSCG00000044449	Unknown	14.0857	4.4342	7.98959e-08	9.65125	10	0	4	6	3	0	0	3	Active	Active	4.8	15.32	-1.31482	1.70888e-05
higher RPS in liver	2	143327590	ENSSSCG00000014391	ARAP3	22.0687	14.0818	4.5412e-07	7.98625	16	0	0	16	10	0	0	10	Active	Active	12.02	16.66	-0.487405	0.053299
higher RPS in liver	2	143501748	ENSSSCG00000022289	PCDH1	27.6544	23.8584	0.000866707	3.795	19	0	1	18	16	0	2	14	Active	Active	6.41	11.77	-0.933293	0.000310909
higher RPS in liver	2	143540855	ENSSSCG00000014394	RNF14	8.98736	5.47824	4.73465e-06	3.5075	7	0	0	7	4	0	1	3	Inactive	Active	121.16	143.99	-0.13603	0.313
higher RPS in liver	2	147857869	ENSSSCG00000014415	GPR151	5.05552	0	5.18239e-08	5.0525	4	0	3	1	0	0	0	0	Inactive	Inactive	0.02	0	-	-
higher RPS in liver	2	149360123	ENSSSCG00000045153	Unknown	3.12072	0	7.18363e-05	3.115	3	0	1	2	0	0	0	0	Inactive	Inactive	0.59	0.77	-0.271449	0.382458
higher RPS in liver	2	150662351	ENSSSCG00000014435	CSNK1A1	27.728	19.3869	1.0099e-07	8.34125	18	0	1	17	12	0	0	12	Active	Active	256.53	314.99	-0.17086	0.276014
higher RPS in liver	2	150660685	ENSSSCG00000014436	ARHGEF37	27.728	19.3869	1.0099e-07	8.34125	18	0	1	17	12	0	0	12	Active	Active	2.52	4.47	-0.73578	0.0147206
higher RPS in liver	14	348345	ENSSSCG00000035269	NXNL2	18.9233	15.3727	9.65444e-06	3.54875	13	0	0	13	10	0	0	10	Active	Active	0.07	0.11	-	-
higher RPS in liver	14	659309	ENSSSCG00000009580	S1PR3	15.9398	4.50445	4.94664e-11	11.4362	10	0	0	10	3	0	0	3	Active	Active	3.13	3.46	0.024319	0.932339
higher RPS in liver	14	2056712	ENSSSCG00000009589	SYK	4.28355	0	4.47432e-07	4.28	3	0	0	3	0	0	0	0	Active	Active	15.38	3.78	2.18704	4.92094e-14
higher RPS in liver	14	2603255	ENSSSCG00000009592	NFIL3	58.8339	49.4028	2.64488e-06	9.43	41	6	18	17	35	9	10	16	Active	Active	44.84	13.89	1.51855	1.43729e-07
higher RPS in liver	14	6188708	ENSSSCG00000009612	DOK2	19.4475	7.37102	2.83497e-06	12.0775	14	0	3	11	6	0	1	5	Active	Active	21.01	2.89	2.84032	2.54605e-26
higher RPS in liver	14	6187631	ENSSSCG00000009611	XPO7	19.4475	7.37102	2.83497e-06	12.0775	14	0	3	11	6	0	1	5	Active	Active	135.8	91.68	0.629655	0.00079105
higher RPS in liver	14	6289337	ENSSSCG00000009610	NPM2	6.30882	0	1.77333e-05	6.30375	7	0	2	5	0	0	0	0	Active	Active	1.35	0.57	1.49251	0.000212171
higher RPS in liver	14	6563668	ENSSSCG00000030228	PIWIL2	6.2544	0	8.87858e-08	6.24875	5	0	0	5	0	0	0	0	Inactive	Inactive	1.3	1.43	0.00319371	0.991944
higher RPS in liver	14	6639206	ENSSSCG00000032622	SLC39A14	6.10584	0	3.00002e-10	6.1025	4	0	4	0	0	0	0	0	Active	Active	184.5	97.52	0.91089	3.41285e-08
higher RPS in liver	14	7359315	ENSSSCG00000009633	TNFRSF10A	4.3625	0	3.82105e-09	4.35625	3	0	0	3	0	0	0	0	Active	Active	25	17.5	0.540342	0.00148469
higher RPS in liver	14	7390061	ENSSSCG00000033113	CHMP7	11.992	6.25551	9.36237e-06	5.735	9	0	2	7	5	0	0	5	Active	Active	34.34	68.48	-0.929283	5.20288e-09
higher RPS in liver	14	7961566	ENSSSCG00000009642	STC1	14.6361	11.5178	1.48103e-05	3.11875	11	0	0	11	9	0	2	7	Active	Active	3.48	7.36	-1.08723	0.00108388
higher RPS in liver	14	10733069	ENSSSCG00000009661	ADRA1A	14.8113	3.57742	5.05915e-08	11.2338	11	8	0	3	3	0	0	3	Active	Active	24.28	5.42	2.30292	1.44499e-08
higher RPS in liver	14	11207381	ENSSSCG00000009665	CHRNA2	19.0339	15.6002	5.8287e-05	3.435	13	0	4	9	11	0	5	6	Active	Inactive	0.21	0	-	-
higher RPS in liver	14	11216977	ENSSSCG00000009666	EPHX2	8.11285	3.97999	7.32385e-10	4.13	6	0	2	4	3	0	2	1	Active	Active	234	26.33	3.16084	6.07947e-30
higher RPS in liver	14	11352475	ENSSSCG00000009668	CLU	9.79565	1.59406	9.59142e-08	8.19875	8	0	0	8	2	0	1	1	Active	Active	2320.38	69.41	5.02355	6.23397e-51
higher RPS in liver	14	12101698	ENSSSCG00000032600	PNOC	27.746	13.0119	1.09759e-07	14.7325	22	0	10	12	11	0	0	11	Inactive	Inactive	0.48	0	-	-
higher RPS in liver	14	12692431	ENSSSCG00000009681	INTS9	20.9298	13.0521	1.2109e-06	7.875	16	0	1	15	10	0	0	10	Active	Active	8.36	11.73	-0.452095	0.00330785
higher RPS in liver	14	12692588	ENSSSCG00000009682	HMBOX1	20.9298	13.0521	1.2109e-06	7.875	16	0	1	15	10	0	0	10	Active	Active	39.42	41.99	0.0687145	0.670697
higher RPS in liver	14	14954836	ENSSSCG00000034740	Unknown	30.4831	23.2489	0.000356571	7.235	31	3	6	22	21	0	3	18	Active	Inactive	2.09	1.69	0.464647	0.237993
higher RPS in liver	14	15110680	ENSSSCG00000032865	DEFB136	6.5576	0	2.57404e-10	6.5525	5	0	1	4	0	0	0	0	Inactive	Inactive	0	0	-	-
higher RPS in liver	14	18618383	ENSSSCG00000042330	Unknown	3.06985	0	2.81194e-08	3.065	2	0	0	2	0	0	0	0	Inactive	Inactive	0.71	1.18	-0.618583	0.0923848
higher RPS in liver	14	19825115	ENSSSCG00000009709	MFAP3L	13.4084	1.24154	1.66132e-07	12.1662	10	0	4	6	1	0	0	1	Active	Active	7.68	4.87	0.813584	0.00187264
higher RPS in liver	14	19997954	ENSSSCG00000009711	HPF1	4.97194	1.29105	6.75117e-06	3.6825	4	0	0	4	1	0	0	1	Inactive	Inactive	108.95	56.73	1.04031	1.24338e-07
higher RPS in liver	14	20144659	ENSSSCG00000009714	NEK1	16.6524	12.0751	0.000302897	4.5775	13	2	3	8	10	4	1	5	Active	Active	32.49	18.85	0.905215	1.31829e-05
higher RPS in liver	14	23418133	ENSSSCG00000009741	PUS1	6.58593	0.957194	7.13279e-07	5.62625	5	0	0	5	1	0	1	0	Active	Active	23.01	25.98	0.0692781	0.818163
higher RPS in liver	14	26611566	ENSSSCG00000009753	TMEM132C	6.71485	0	1.26326e-08	6.71	5	0	0	5	0	0	0	0	Active	Active	4.79	0.77	2.7296	5.88034e-27
higher RPS in liver	14	29400440	ENSSSCG00000009771	DDX55	28.8184	15.9224	7.51934e-08	12.8912	21	0	5	16	12	0	1	11	Active	Active	19.44	27.23	-0.335283	0.055966
higher RPS in liver	14	29400437	ENSSSCG00000009772	TMED2	28.8184	15.9224	7.51934e-08	12.8912	21	0	5	16	12	0	1	11	Active	Active	1443.07	371.55	2.04545	7.28335e-20
higher RPS in liver	14	29543493	ENSSSCG00000009777	KMT5A	12.409	7.20281	5.3636e-08	5.2075	9	0	3	6	5	0	0	5	Active	Active	22.94	20.51	0.193227	0.301968
higher RPS in liver	14	30084949	ENSSSCG00000009788	DENR	10.9996	1.28978	5.85173e-12	9.70875	7	0	4	3	1	0	1	0	Active	Active	62.1	41.12	0.796547	5.16621e-08
higher RPS in liver	14	30469070	ENSSSCG00000028005	VPS33A	7.19624	1.28154	4.44584e-08	5.915	5	0	1	4	1	0	0	1	Active	Active	20.56	17.24	0.440571	0.0226987
higher RPS in liver	14	32311751	ENSSSCG00000009831	CUX2	16.7924	5.39158	1.08859e-07	11.4	13	0	4	9	4	0	2	2	Active	Active	10.25	0.5	4.37271	2.27434e-43
higher RPS in liver	14	32600693	ENSSSCG00000009832	PHETA1	10.9045	2.65215	1.268e-09	8.25125	8	0	4	4	2	0	1	1	Active	Active	11.71	9.11	0.507798	0.0385556
higher RPS in liver	14	32623308	ENSSSCG00000009833	SH2B3	22.2863	15.1181	1.51716e-05	7.1675	16	0	5	11	11	0	1	10	Active	Active	16.83	23.93	-0.435336	0.0150321
higher RPS in liver	14	34317064	ENSSSCG00000009845	SRRM4	29.3588	25.568	5.8658e-06	3.79125	20	0	4	16	17	0	1	16	Active	Active	0.49	1.46	-1.29853	0.00575439
higher RPS in liver	14	34317234	ENSSSCG00000009849	SUDS3	29.3588	25.568	5.8658e-06	3.79125	20	0	4	16	17	0	1	16	Active	Active	89.97	82.42	0.224501	0.07362
higher RPS in liver	14	37582822	ENSSSCG00000009865	TBX3	9.93347	5.51736	7.0114e-06	4.41625	8	0	3	5	6	0	2	4	Active	Active	15.65	8.03	0.85596	0.00117332
higher RPS in liver	14	38446730	ENSSSCG00000009869	LHX5	5.49191	0	2.42618e-11	5.4875	4	0	0	4	0	0	0	0	Inactive	Inactive	0.22	0.14	-	-
higher RPS in liver	14	38808233	ENSSSCG00000009880	SLC8B1	11.0029	2.86814	1.09123e-09	8.13625	8	0	2	6	2	0	1	1	Active	Active	26.86	7.13	2.00494	1.80699e-19
higher RPS in liver	14	39303337	ENSSSCG00000039130	RPL6	11.0138	2.83793	6.07491e-08	8.1775	8	0	2	6	2	0	1	1	Active	Active	3207.65	4274.76	-0.335969	0.0342207
higher RPS in liver	14	40408631	ENSSSCG00000039265	COX6A1	11.7192	4.57528	6.45589e-08	7.14625	8	0	0	8	3	0	0	3	Active	Active	187.54	57.14	1.68895	1.5615e-11
higher RPS in liver	14	40822761	ENSSSCG00000009917	SPPL3	8.04088	1.48425	3.61263e-10	6.55625	6	0	0	6	1	0	0	1	Active	Active	13.73	23.49	-0.729229	0.000128765
higher RPS in liver	14	42984889	ENSSSCG00000009952	TMEM211	9.07965	2.74898	6.55841e-10	6.32875	6	0	3	3	2	0	2	0	Inactive	Inactive	0.38	1.39	-2.04971	0.00105524
higher RPS in liver	14	43057893	ENSSSCG00000033385	KIAA1671	4.5612	0	4.1613e-12	4.555	3	0	0	3	0	0	0	0	Inactive	Inactive	14.68	37.76	-1.32639	3.15208e-08
higher RPS in liver	14	43208823	ENSSSCG00000009955	CRYBB2	12.8366	3.12406	1.78404e-08	9.715	10	0	2	8	2	0	0	2	Inactive	Active	0.04	0.73	-5.29794	NA
higher RPS in liver	14	44034247	ENSSSCG00000009959	ASPHD2	8.94076	4.6399	1.54192e-05	4.2975	8	0	2	6	4	0	2	2	Inactive	Inactive	0.52	1.5	-1.40281	2.39809e-06
higher RPS in liver	14	46254328	ENSSSCG00000009972	KREMEN1	6.92587	1.41385	1.06166e-08	5.51625	5	0	3	2	1	0	1	0	Active	Active	5.53	27.75	-2.30391	6.28733e-38
higher RPS in liver	14	46348628	ENSSSCG00000009975	EMID1	4.81964	0	1.44457e-09	4.81375	3	0	1	2	0	0	0	0	Inactive	Inactive	47.39	5.88	2.85593	4.17927e-19
higher RPS in liver	14	47799643	ENSSSCG00000010016	MORC2	14.0965	1.5896	4.59311e-10	12.5075	9	0	0	9	1	0	0	1	Active	Active	26.77	22.25	0.288545	0.0486555
higher RPS in liver	14	47879317	ENSSSCG00000010017	SMTN	16.1527	12.4694	4.67212e-05	3.685	11	0	2	9	9	0	5	4	Active	Active	53.24	126.95	-1.29848	7.24727e-06
higher RPS in liver	14	47905440	ENSSSCG00000029781	SELENOM	3.37312	0	1.4538e-06	3.3675	3	0	0	3	0	0	0	0	Active	Active	62.57	129.65	-0.833958	0.00192007
higher RPS in liver	14	47913405	ENSSSCG00000030345	INPP5J	6.17486	0	5.04964e-09	6.17	5	0	1	4	0	0	0	0	Active	Active	0.25	1.17	-1.97654	0.000112281
higher RPS in liver	14	47928810	ENSSSCG00000010023	PLA2G3	5.8815	0	1.99308e-08	5.87875	5	0	0	5	0	0	0	0	Active	Active	0.23	0.68	-1.37312	0.0238481
higher RPS in liver	14	48929410	ENSSSCG00000038719	IGLL1	13.8459	10.8247	0.011629	3.02	10	0	3	7	8	0	6	2	Inactive	Inactive	4.26	14.55	-1.72647	NA
higher RPS in liver	14	48957639	ENSSSCG00000030830	IGLV3-32	7.59922	4.04457	0.00456039	3.5525	10	0	3	7	5	0	1	4	Inactive	Inactive	0	0	-	-
higher RPS in liver	14	49184735	ENSSSCG00000010047	RSPH14	8.96476	4.5253	7.97805e-08	4.4425	6	0	2	4	3	0	0	3	Active	Active	0.02	0.01	-	-
higher RPS in liver	14	49208762	ENSSSCG00000010052	BCR	12.7423	9.69753	0.000490839	3.04375	8	0	0	8	6	0	0	6	Active	Active	16.73	11.34	0.63344	0.00168981
higher RPS in liver	14	49468862	ENSSSCG00000010054	ADORA2A	10.545	5.57601	8.7941e-07	4.96875	7	0	4	3	4	0	1	3	Active	Active	6.43	4.26	0.738449	0.21392
higher RPS in liver	14	49585748	ENSSSCG00000010059	GUCD1	5.88343	0	7.84128e-07	5.88	5	0	3	2	0	0	0	0	Active	Active	148.79	129.01	0.18397	0.476677
higher RPS in liver	14	49585326	ENSSSCG00000010058	AP000356.5	5.88343	0	7.84128e-07	5.88	5	0	3	2	0	0	0	0	Active	Active	308.29	210.49	0.690492	0.00044038
higher RPS in liver	14	50082896	ENSSSCG00000010081	MAPK1	7.40037	0	1.94268e-08	7.39625	6	2	0	4	0	0	0	0	Active	Active	79.84	75.94	0.0129861	0.935636
higher RPS in liver	14	50190642	ENSSSCG00000037288	YPEL1	10.6181	2.56108	5.84131e-09	8.05625	8	0	0	8	2	0	0	2	Active	Active	9.52	5.14	0.822238	0.086053
higher RPS in liver	14	50260869	ENSSSCG00000010086	CCDC116	26.9132	20.1142	5.08694e-07	6.7975	21	0	7	14	14	0	2	12	Active	Active	0.45	0.42	-	-
higher RPS in liver	14	50260788	ENSSSCG00000010087	YDJC	26.9132	20.1142	5.08694e-07	6.7975	21	0	7	14	14	0	2	12	Active	Active	12.34	1.93	2.75117	1.00895e-18
higher RPS in liver	14	50380379	ENSSSCG00000038652	TMEM191C	8.16023	4.28746	7.01212e-07	3.86875	6	0	0	6	3	0	0	3	Active	Inactive	0.14	0	-	-
higher RPS in liver	14	50416309	ENSSSCG00000010093	SERPIND1	22.2013	17.7493	0.000451103	4.45125	17	0	2	15	13	0	2	11	Inactive	Active	2045.61	0.48	11.9465	4.08803e-30
higher RPS in liver	14	50562613	ENSSSCG00000010096	AIFM3	3.55234	0	1.46512e-05	3.54875	3	0	0	3	0	0	0	0	Active	Active	0.15	0.2	-	-
higher RPS in liver	14	50664554	ENSSSCG00000010104	MZT2A	6.57468	0	1.30169e-07	6.57125	5	0	2	3	0	0	0	0	Active	Active	216.35	95.46	1.08009	1.75666e-05
higher RPS in liver	14	50663608	ENSSSCG00000010105	SMPD4	6.57468	0	1.30169e-07	6.57125	5	0	2	3	0	0	0	0	Active	Active	19.89	39.85	-0.986805	0.00125483
higher RPS in liver	14	50960420	ENSSSCG00000010115	GSC2	15.8993	11.7028	0.000347728	4.195	12	0	0	12	9	0	0	9	Active	Active	0	0.18	-	-
higher RPS in liver	14	51133072	ENSSSCG00000010121	UFD1	8.28231	3.78876	4.13843e-06	4.4925	6	0	0	6	3	0	0	3	Active	Active	54.76	46.91	0.331369	0.136108
higher RPS in liver	14	51133408	ENSSSCG00000010122	CDC45	8.28231	3.78876	4.13843e-06	4.4925	6	0	0	6	3	0	0	3	Active	Active	53.54	13.43	1.93783	1.86149e-07
higher RPS in liver	14	51225776	ENSSSCG00000042882	Unknown	12.6892	8.21906	4.53958e-05	4.47125	8	0	2	6	5	0	2	3	Inactive	Inactive	0.29	0.56	-0.918267	0.0546344
higher RPS in liver	14	53107616	ENSSSCG00000046944	Unknown	6.26381	1.38107	0.000313483	4.8825	9	0	0	9	2	0	0	2	Inactive	Inactive	1.09	2.1	-0.633589	0.044418
higher RPS in liver	14	54990849	ENSSSCG00000025986	EDARADD	13.8828	2.65831	4.04068e-08	11.225	10	0	2	8	2	0	1	1	Active	Active	0.53	0.1	3.32502	8.45506e-06
higher RPS in liver	14	55181687	ENSSSCG00000038853	GPR137B	7.77533	0	1.05215e-08	7.76875	6	0	1	5	0	0	0	0	Active	Active	6.42	5.81	0.301457	0.221541
higher RPS in liver	14	55239652	ENSSSCG00000026819	NID1	8.07275	0	1.82346e-07	8.06875	6	0	4	2	0	0	0	0	Active	Active	114.11	281.02	-1.41455	1.06798e-11
higher RPS in liver	14	55433018	ENSSSCG00000010151	LYST	8.93041	0	8.83085e-10	8.92375	6	0	1	5	0	0	0	0	Active	Inactive	24.58	18.98	0.651634	0.00200658
higher RPS in liver	14	55912219	ENSSSCG00000034844	TBCE	3.33212	0	6.14511e-07	3.32625	3	1	0	2	0	0	0	0	Inactive	Inactive	51.43	76.47	-0.48492	0.0386185
higher RPS in liver	14	61835776	ENSSSCG00000042520	Unknown	9.71867	5.10093	7.09516e-06	4.61625	7	0	0	7	4	0	3	1	Inactive	Inactive	0.7	1.12	-0.456638	0.0848627
higher RPS in liver	14	62525842	ENSSSCG00000039215	PHYHIPL	37.3527	8.76572	1.93333e-09	28.5862	29	5	10	14	6	0	1	5	Active	Active	26.17	1.25	4.56917	4.67855e-61
higher RPS in liver	14	70799845	ENSSSCG00000047815	Unknown	24.4969	17.7903	0.00449911	6.70625	32	0	2	30	20	0	1	19	Inactive	Inactive	0.24	1.56	-2.60899	0.000142396
higher RPS in liver	14	71401447	ENSSSCG00000021995	ATOH7	8.01086	1.4313	3.4345e-07	6.58	6	0	1	5	1	0	0	1	Active	Active	0.93	0	4.44496	0.127099
higher RPS in liver	14	72069395	ENSSSCG00000010248	KIFBP	5.57837	0	3.02934e-10	5.5725	4	0	2	2	0	0	0	0	Inactive	Inactive	18.66	16.54	0.223681	0.242191
higher RPS in liver	14	72183363	ENSSSCG00000023374	SRGN	11.663	8.09163	2.21372e-06	3.57	8	0	0	8	6	0	0	6	Active	Inactive	580.2	67.67	3.23708	1.58551e-12
higher RPS in liver	14	72351149	ENSSSCG00000010253	HK1	3.54179	0	1.01323e-06	3.53625	3	0	0	3	0	0	0	0	Inactive	Inactive	26.27	34.71	-0.308214	0.115293
higher RPS in liver	14	72475554	ENSSSCG00000010254	TACR2	8.14009	4.29336	2.12746e-06	3.8475	6	3	0	3	3	0	2	1	Inactive	Inactive	0.48	0.62	-0.135406	0.782814
higher RPS in liver	14	72468914	ENSSSCG00000036152	TSPAN15	18.5479	12.1718	4.4049e-07	6.375	13	2	0	11	8	0	4	4	Active	Active	104.47	15.32	2.67439	9.05299e-35
higher RPS in liver	14	73723800	ENSSSCG00000010274	SGPL1	13.6456	2.19177	4.41822e-09	11.4525	9	0	7	2	2	0	0	2	Active	Active	80.59	22.35	1.80928	1.3105e-31
higher RPS in liver	14	73807281	ENSSSCG00000010275	PCBD1	13.492	1.37694	5.75501e-10	12.1163	10	0	1	9	1	0	0	1	Active	Active	833.26	24.84	4.98454	1.34935e-105
higher RPS in liver	14	74638030	ENSSSCG00000038545	C10ORF105	16.103	11.7245	2.88565e-07	4.37875	11	0	2	9	8	0	3	5	Inactive	Inactive	0.01	0.13	-	-
higher RPS in liver	14	77957851	ENSSSCG00000034308	LRMDA	5.95405	0	1.11258e-07	5.95	5	0	1	4	0	0	0	0	Active	Active	36.16	114.16	-1.44061	0.00455135
higher RPS in liver	14	81901817	ENSSSCG00000010332	PLAC9	9.31441	4.34759	4.23059e-06	4.9675	7	0	2	5	3	0	0	3	Active	Active	11.25	90.01	-3.09701	7.41702e-26
higher RPS in liver	14	82107675	ENSSSCG00000010336	SFTPA1	3.59971	0	1.6225e-10	3.595	2	2	0	0	0	0	0	0	Inactive	Inactive	8.54	3.16	1.06169	0.104899
higher RPS in liver	14	86829849	ENSSSCG00000046582	Unknown	4.51264	1.25319	0.00230415	3.2575	8	0	0	8	3	0	0	3	Inactive	Inactive	0.09	0.19	-	-
higher RPS in liver	14	87644240	ENSSSCG00000010358	OPN4	13.6092	5.94745	9.36032e-08	7.66125	10	2	0	8	4	0	0	4	Inactive	Inactive	0	11.1	-12.0531	5.46222e-30
higher RPS in liver	14	87644242	ENSSSCG00000010359	LDB3	13.6092	5.94745	9.36032e-08	7.66125	10	2	0	8	4	0	0	4	Inactive	Inactive	0.25	2573.01	-13.8327	0
higher RPS in liver	14	87930147	ENSSSCG00000051357	Unknown	3.89006	0	4.08639e-09	3.885	3	0	0	3	0	0	0	0	Active	Active	0	0.07	-	-
higher RPS in liver	14	88005550	ENSSSCG00000010368	GLUD1	9.19958	0	1.27552e-13	9.19375	6	1	0	5	0	0	0	0	Active	Active	2927.42	266.27	3.54754	1.0149e-55
higher RPS in liver	14	88005590	ENSSSCG00000027767	SHLD2	9.19958	0	1.27552e-13	9.19375	6	1	0	5	0	0	0	0	Active	Active	17.44	9.3	1.01167	0.000390705
higher RPS in liver	14	90075898	ENSSSCG00000010391	ERCC6	6.41676	1.10792	3.8392e-09	5.31125	5	0	0	5	1	0	0	1	Active	Active	10.22	11.89	0.0139985	0.926586
higher RPS in liver	14	90113844	ENSSSCG00000022274	SLC18A3	6.36364	0	2.30682e-08	6.35875	5	0	0	5	0	0	0	0	Active	Active	0	0	-	-
higher RPS in liver	14	90480986	ENSSSCG00000010396	PARG	7.24947	0	1.41912e-05	7.24625	6	0	0	6	0	0	0	0	Active	Active	38.93	38.27	0.123142	0.268659
higher RPS in liver	14	90481070	ENSSSCG00000033700	TIMM23B-AGAP6	7.24947	0	1.41912e-05	7.24625	6	0	0	6	0	0	0	0	Active	Active	107.73	208.02	-0.805095	0.000712452
higher RPS in liver	14	90504654	ENSSSCG00000039871	Unknown	4.07253	0	0.000122292	4.06875	3	0	0	3	0	0	0	0	Inactive	Inactive	8.15	2.39	2.25133	0.161768
higher RPS in liver	14	90536009	ENSSSCG00000010399	NCOA4	3.89369	0	4.7025e-05	3.89	3	0	0	3	0	0	0	0	Inactive	Inactive	514.33	238.75	1.25042	3.34631e-12
higher RPS in liver	14	91050721	ENSSSCG00000042469	Unknown	21.5514	11.976	0.00100553	9.5775	28	0	4	24	12	0	1	11	Inactive	Inactive	0.1	0.37	-	-
higher RPS in liver	14	98908630	ENSSSCG00000010431	A1CF	14.1088	0	3.4685e-08	14.105	10	0	5	5	0	0	0	0	Active	Inactive	244.66	0.24	10.1018	9.86516e-223
higher RPS in liver	14	99685578	ENSSSCG00000010437	PAPSS2	3.47511	0	5.98999e-07	3.46875	3	0	2	1	0	0	0	0	Active	Inactive	120.85	9.41	3.54991	1.48399e-28
higher RPS in liver	14	99929448	ENSSSCG00000010440	Unknown	25.5546	18.8712	3.15039e-07	6.68625	18	0	9	9	13	0	4	9	Active	Active	206.88	127.36	0.813447	9.3212e-06
higher RPS in liver	14	101185589	ENSSSCG00000010451	IFIT2	9.74866	3.00554	2.49856e-08	6.74375	6	2	0	4	2	0	0	2	Inactive	Inactive	58.67	25.05	1.40287	0.110318
higher RPS in liver	14	101368152	ENSSSCG00000010455	SLC16A12	17.297	7.26506	1.42975e-09	10.0312	11	5	0	6	5	0	3	2	Active	Active	206.69	2.66	6.40587	5.73709e-74
higher RPS in liver	14	103517641	ENSSSCG00000010466	FGFBP3	14.8018	10.5398	3.22861e-06	4.26125	10	0	4	6	7	0	0	7	Active	Active	1.58	0.33	2.71557	5.10557e-06
higher RPS in liver	14	104106576	ENSSSCG00000010470	IDE	7.07838	1.45246	5.69816e-10	5.62375	5	0	0	5	1	0	0	1	Active	Active	75.08	120.95	-0.549354	0.00745487
higher RPS in liver	14	104194343	ENSSSCG00000036314	HHEX	13.0711	0	7.84437e-11	13.0675	10	0	4	6	0	0	0	0	Active	Active	75.91	3.8	4.28969	6.39847e-53
higher RPS in liver	14	104551333	ENSSSCG00000010474	CYP26C1	3.88412	0	3.15208e-09	3.88	3	0	1	2	0	0	0	0	Active	Active	0.32	0.48	-	-
higher RPS in liver	14	104563195	ENSSSCG00000010475	CYP26A1	16.2561	0	4.2137e-11	16.2512	12	0	3	9	0	0	0	0	Active	Active	4.59	0.17	5.35599	5.63564e-18
higher RPS in liver	14	105011922	ENSSSCG00000010478	FFAR4	5.93474	0	8.23148e-13	5.93	4	3	0	1	0	0	0	0	Active	Active	1.26	1.69	-0.187783	0.596076
higher RPS in liver	14	105044765	ENSSSCG00000010479	RBP4	8.19245	0	1.0108e-11	8.1875	5	4	0	1	0	0	0	0	Active	Active	3254.75	5.03	9.1869	7.96916e-257
higher RPS in liver	14	105051920	ENSSSCG00000010480	PDE6C	6.1859	0	2.70279e-09	6.18125	4	4	0	0	0	0	0	0	Inactive	Inactive	1.11	0.19	2.92933	1.62502e-09
higher RPS in liver	14	106013495	ENSSSCG00000035347	CYP2C42	10.4167	3.24976	2.65817e-05	7.16625	11	0	0	11	3	0	0	3	Inactive	Inactive	143.92	0.94	7.48549	6.137e-63
higher RPS in liver	14	106516421	ENSSSCG00000026798	Unknown	5.90432	2.51959	7.76007e-06	3.38625	5	3	2	0	2	0	0	2	Inactive	Inactive	0.25	0.04	-	-
higher RPS in liver	14	106736151	ENSSSCG00000051054	L1TD1	15.4244	1.4491	1.15093e-07	13.9763	12	0	2	10	1	0	1	0	Active	Inactive	2.77	1.21	1.18724	0.0030361
higher RPS in liver	14	107263344	ENSSSCG00000010496	TCTN3	12.9863	2.54876	5.1239e-08	10.4388	9	0	5	4	2	0	0	2	Active	Active	13.25	11.58	0.374069	0.0305095
higher RPS in liver	14	107263449	ENSSSCG00000010497	ENTPD1	12.9863	2.54876	5.1239e-08	10.4388	9	0	5	4	2	0	0	2	Active	Active	16.71	15.73	0.350279	0.296069
higher RPS in liver	14	107750796	ENSSSCG00000010505	DNTT	7.03676	1.25381	1.81222e-07	5.785	6	0	3	3	1	0	0	1	Inactive	Inactive	0.67	1.48	-0.917098	0.248064
higher RPS in liver	14	108303929	ENSSSCG00000010509	PIK3AP1	7.72524	0	8.03598e-07	7.72	6	0	2	4	0	0	0	0	Active	Active	55.1	7.08	3.05868	7.24788e-31
higher RPS in liver	14	108304025	ENSSSCG00000010513	LCOR	7.72524	0	8.03598e-07	7.72	6	0	2	4	0	0	0	0	Active	Active	31.36	33.96	0.110226	0.491568
higher RPS in liver	14	110635874	ENSSSCG00000010537	GOT1	6.55631	0	1.04737e-10	6.55125	5	0	0	5	0	0	0	0	Active	Active	296.48	655.95	-1.30711	1.64906e-06
higher RPS in liver	14	111225685	ENSSSCG00000010545	CPN1	14.9378	9.45778	3.51052e-05	5.47875	9	0	6	3	7	0	0	7	Inactive	Inactive	385.99	0.05	13.9345	2.17712e-40
higher RPS in liver	14	111301927	ENSSSCG00000010546	Unknown	21.9032	17.1037	0.018444	4.80125	17	0	3	14	16	0	0	16	Active	Inactive	4535.82	1.2	11.9159	4.92517e-206
higher RPS in liver	14	111461560	ENSSSCG00000010554	SCD	11.8661	8.47874	2.51059e-08	3.38875	7	0	0	7	5	0	0	5	Active	Active	116.55	102.49	0.158271	NA
higher RPS in liver	14	111624073	ENSSSCG00000006165	SEC31B	7.98562	1.37226	1.39629e-09	6.6125	6	2	2	2	1	0	0	1	Active	Active	5.69	25.51	-2.15981	4.15293e-18
higher RPS in liver	14	111641867	ENSSSCG00000044499	Unknown	4.78567	0	7.48504e-09	4.78	4	2	0	2	0	0	0	0	Inactive	Inactive	4.9	12.34	-1.26951	0.000257743
higher RPS in liver	14	111834168	ENSSSCG00000010556	PAX2	9.10146	0	1.0077e-09	9.0975	7	3	1	3	0	0	0	0	Active	Active	0.03	0	-	-
higher RPS in liver	14	113464029	ENSSSCG00000033359	CUEDC2	3.98088	0	5.52527e-09	3.97625	3	0	0	3	0	0	0	0	Active	Active	45.56	85.86	-0.984865	3.92891e-05
higher RPS in liver	14	113464174	ENSSSCG00000010584	MFSD13A	3.98088	0	5.52527e-09	3.97625	3	0	0	3	0	0	0	0	Active	Active	4.3	2.57	0.595049	0.10531
higher RPS in liver	14	113737748	ENSSSCG00000029594	WBP1L	10.3845	5.2437	5.308e-08	5.14125	7	0	3	4	4	0	0	4	Active	Active	95.05	57.21	0.693053	0.00389598
higher RPS in liver	14	118210286	ENSSSCG00000047482	Unknown	9.5716	4.38255	0.00578229	5.1875	14	0	0	14	6	0	0	6	Inactive	Inactive	0.09	0	-	-
higher RPS in liver	14	120739622	ENSSSCG00000030507	SMNDC1	22.435	13.7597	2.61805e-10	8.67375	16	0	2	14	10	0	2	8	Active	Active	41.13	33.15	0.394613	0.0485923
higher RPS in liver	14	120906343	ENSSSCG00000040815	DUSP5	4.01786	0	9.24691e-11	4.01125	3	0	2	1	0	0	0	0	Active	Active	4.01	1.54	1.39705	0.000157391
higher RPS in liver	14	120963791	ENSSSCG00000036552	ATP5F1B	13.7722	8.82092	2.29771e-08	4.95125	9	0	0	9	6	0	0	6	Inactive	Inactive	0.06	0.07	-	-
higher RPS in liver	14	120969632	ENSSSCG00000010625	SMC3	11.5705	8.36886	2.46954e-06	3.2025	8	0	0	8	6	0	0	6	Active	Active	188.06	94.2	1.10293	0.000125296
higher RPS in liver	14	121349057	ENSSSCG00000010628	SHOC2	6.43584	2.85525	3.41482e-07	3.57875	5	0	5	0	2	0	0	2	Active	Active	75.96	61.94	0.388873	0.101234
higher RPS in liver	14	122724131	ENSSSCG00000010631	GPAM	25.2212	8.3695	1.74082e-06	16.8513	19	0	4	15	7	0	0	7	Inactive	Inactive	56.1	19.63	1.42174	4.00567e-08
higher RPS in liver	14	122848579	ENSSSCG00000010635	ZDHHC6	3.98281	0	1.81047e-05	3.9775	4	0	0	4	0	0	0	0	Active	Active	120.53	35.67	1.7999	5.53406e-20
higher RPS in liver	14	122849004	ENSSSCG00000032968	VTI1A	3.98281	0	1.81047e-05	3.9775	4	0	0	4	0	0	0	0	Active	Active	32.75	31.75	0.184365	0.407264
higher RPS in liver	14	127275738	ENSSSCG00000010666	VAX1	7.53789	1.28689	6.74068e-08	6.2525	6	0	3	3	1	0	0	1	Active	Active	0.02	0.31	-	-
higher RPS in liver	14	127357555	ENSSSCG00000020671	SLC18A2	5.27556	0	2.73025e-06	5.2725	4	0	0	4	0	0	0	0	Active	Active	3.74	0.47	3.22158	7.25924e-15
higher RPS in liver	14	127650688	ENSSSCG00000032558	EMX2	6.88222	2.78705	5.02124e-08	4.095	5	0	0	5	2	0	0	2	Active	Active	0.02	2.73	-7.32192	3.08826e-11
higher RPS in liver	14	128402560	ENSSSCG00000010674	FAM204A	4.30744	0	2.35304e-05	4.30375	4	0	0	4	0	0	0	0	Active	Active	195.16	74.1	1.49664	1.16414e-08
higher RPS in liver	14	128619461	ENSSSCG00000037789	PRLHR	3.54151	0	1.03145e-06	3.53625	3	0	0	3	0	0	0	0	Active	Inactive	0.57	0.62	-0.00472343	0.987081
higher RPS in liver	14	129090788	ENSSSCG00000010682	PRDX3	6.66744	2.54051	3.0973e-08	4.12625	5	0	1	4	2	0	0	2	Active	Active	669.52	324.17	0.971322	3.17331e-07
higher RPS in liver	14	131946792	ENSSSCG00000010702	PLEKHA1	3.61232	0	4.25183e-06	3.6075	3	0	1	2	0	0	0	0	Active	Inactive	46.41	31.39	0.58818	0.00928595
higher RPS in liver	14	132321592	ENSSSCG00000002977	SPMI	8.74265	4.97115	0.00288109	3.77	8	0	3	5	5	1	1	3	Inactive	Active	0.1	0	-	-
higher RPS in liver	14	141253370	ENSSSCG00000010773	TUBGCP2	3.71623	0	2.94356e-07	3.71	3	0	0	3	0	0	0	0	Active	Active	61.56	118.92	-0.783366	1.15954e-05
higher RPS in liver	14	141253368	ENSSSCG00000010774	ZNF511	3.71623	0	2.94356e-07	3.71	3	0	0	3	0	0	0	0	Active	Active	53.21	78.27	-0.722743	0.00420113
higher RPS in liver	14	141336633	ENSSSCG00000010791	FUOM	5.3372	0.574621	5.94678e-06	4.76	4	0	0	4	1	0	0	1	Active	Active	156.08	10	3.88316	1.73714e-87
higher RPS in liver	14	141557513	ENSSSCG00000040664	Unknown	17.6402	11.9675	0.00270795	5.675	27	0	0	27	18	0	0	18	Active	Active	0.13	0.1	-	-
higher RPS in liver	14	141594504	ENSSSCG00000049170	Unknown	14.6985	9.81083	0.00240996	4.88625	14	0	0	14	8	0	0	8	Active	Active	0.54	0.62	-0.0410485	0.903374
higher RPS in liver	14	141606102	ENSSSCG00000033157	Unknown	22.2475	17.5848	0.0112755	4.66375	25	0	0	25	19	0	0	19	Active	Active	0.41	0.81	-0.843136	0.255372
higher RPS in liver	14	141735864	ENSSSCG00000010779	SYCE1	3.75652	0.426603	0.0024871	3.32625	5	0	0	5	1	0	0	1	Active	Active	0.32	0.06	-	-
higher RPS in liver	15	115119	ENSSSCG00000016399	STAM2	7.16597	0.950057	0.000444257	6.21125	7	0	0	7	1	0	0	1	Active	Active	35.18	25.08	0.634627	0.000288568
higher RPS in liver	15	832010	ENSSSCG00000016395	RIF1	8.0183	4.30948	1.42347e-06	3.71125	6	0	0	6	3	0	0	3	Active	Active	61.46	41.06	0.737641	0.0011531
higher RPS in liver	15	1574257	ENSSSCG00000047930	Unknown	5.93466	0	3.08246e-06	5.93	6	0	0	6	0	0	0	0	Inactive	Inactive	0.05	1.17	-4.57031	0.000201617
higher RPS in liver	15	1715207	ENSSSCG00000040445	RND3	20.4671	14.6016	8.42148e-09	5.865	15	0	2	13	10	0	5	5	Active	Active	68.97	76.42	-0.13975	0.577134
higher RPS in liver	15	8982945	ENSSSCG00000015673	KYNU	16.0194	0	5.4017e-09	16.0138	12	5	5	2	0	0	0	0	Active	Inactive	261.26	3.83	6.01647	7.69972e-32
higher RPS in liver	15	12953195	ENSSSCG00000040715	NXPH2	10.9427	5.97183	1.09382e-08	4.97	8	0	1	7	4	0	2	2	Active	Active	2.17	4.63	-0.845195	0.0140915
higher RPS in liver	15	17021294	ENSSSCG00000015697	CCNT2	31.0506	16.1248	5.32387e-05	14.925	32	0	8	24	17	0	2	15	Active	Active	54.68	46.56	0.345481	0.111841
higher RPS in liver	15	17093232	ENSSSCG00000047029	Unknown	26.6482	16.4782	8.62562e-09	10.17	17	0	2	15	10	0	2	8	Inactive	Inactive	0.59	1.71	-1.2793	0.00114487
higher RPS in liver	15	17163899	ENSSSCG00000015699	ACMSD	6.78883	0	5.18074e-08	6.78625	5	0	0	5	0	0	0	0	Active	Inactive	45.52	0	11.1146	1.11805e-23
higher RPS in liver	15	19971710	ENSSSCG00000015709	SLC35F5	9.08864	1.33353	2.24372e-09	7.755	7	0	0	7	1	0	0	1	Active	Active	180.31	46.36	1.9723	1.71283e-09
higher RPS in liver	15	23676683	ENSSSCG00000036229	INSIG2	3.51742	0	9.27233e-06	3.515	3	1	0	2	0	0	0	0	Active	Active	94.44	17.35	2.60631	4.55046e-17
higher RPS in liver	15	24407798	ENSSSCG00000015715	EN1	7.86995	2.58822	7.17945e-09	5.2825	6	0	0	6	2	0	0	2	Active	Active	0.04	4.5	-9.51888	2.60014e-17
higher RPS in liver	15	24708998	ENSSSCG00000031239	Unknown	7.29414	0	1.08642e-08	7.29125	6	0	0	6	0	0	0	0	Inactive	Inactive	0.54	0.36	0.417674	0.797748
higher RPS in liver	15	25056595	ENSSSCG00000023693	PROC	12.9959	6.4009	5.22787e-07	6.59375	10	0	3	7	5	0	1	4	Active	Active	1742.32	1.01	10.7878	0
higher RPS in liver	15	31004405	ENSSSCG00000038610	INHBB	40.9543	14.3885	6.54373e-11	26.565	29	0	14	15	10	1	6	3	Active	Active	15.54	5.03	1.83636	2.79695e-10
higher RPS in liver	15	31337585	ENSSSCG00000041307	Unknown	16.94	12.9648	5.36043e-06	3.975	13	0	2	11	9	0	2	7	Inactive	Inactive	0	2.12	-3.76247	0.122794
higher RPS in liver	15	37741807	ENSSSCG00000050097	Unknown	5.02873	1.76939	6.37518e-05	3.26	4	0	0	4	1	0	0	1	Inactive	Inactive	1.46	1.42	0.289843	0.397437
higher RPS in liver	15	42996654	ENSSSCG00000050507	Unknown	15.4479	4.55288	0.000302174	10.8938	24	0	0	24	6	0	0	6	Inactive	Inactive	0	0	-	-
higher RPS in liver	15	45478296	ENSSSCG00000015781	ENPP6	56.5977	40.0347	9.8014e-09	16.5613	37	0	5	32	27	0	6	21	Inactive	Inactive	47.28	7.26	2.71838	5.60674e-23
higher RPS in liver	15	45656928	ENSSSCG00000015782	IRF2	9.11793	5.31297	7.19817e-07	3.80375	7	0	5	2	4	0	3	1	Inactive	Inactive	49.63	29.99	0.647476	0.0083638
higher RPS in liver	15	45709710	ENSSSCG00000015786	PRIMPOL	30.5089	19.2803	5.74965e-08	11.23	21	0	9	12	13	0	6	7	Inactive	Inactive	14.57	5.02	1.61792	5.43656e-07
higher RPS in liver	15	46795038	ENSSSCG00000036679	SORBS2	16.4335	0	3.65763e-09	16.43	12	7	2	3	0	0	0	0	Active	Inactive	74.06	10.15	3.07198	2.27089e-30
higher RPS in liver	15	46966040	ENSSSCG00000015801	TLR3	16.7166	4.06551	1.62562e-10	12.6525	13	0	5	8	3	0	0	3	Active	Active	96.16	8.77	3.55138	4.76978e-14
higher RPS in liver	15	48136362	ENSSSCG00000015820	NSD3	16.6181	11.5001	1.31375e-07	5.12	12	0	5	7	8	0	1	7	Active	Active	18.06	20.47	-0.0578812	0.686286
higher RPS in liver	15	48246018	ENSSSCG00000015819	PLPP5	7.42514	4.25664	2.64187e-06	3.16875	6	0	0	6	3	0	2	1	Active	Active	45.09	9.66	2.21322	4.22753e-26
higher RPS in liver	15	48568202	ENSSSCG00000040833	BRF2	7.76152	1.35191	1.83446e-07	6.41	6	0	0	6	1	0	0	1	Active	Active	12.01	13.37	-0.147975	0.493698
higher RPS in liver	15	54725583	ENSSSCG00000015846	RBPMS	18.5844	9.68351	2.92719e-09	8.9	13	1	1	11	7	0	4	3	Active	Active	17.87	9.53	0.886537	0.00267363
higher RPS in liver	15	54902513	ENSSSCG00000015847	MBOAT4	5.40244	0	9.78493e-09	5.3975	4	0	1	3	0	0	0	0	Inactive	Inactive	0.04	0	-	-
higher RPS in liver	15	55490468	ENSSSCG00000015850	DUSP4	22.0435	9.92944	1.48347e-08	12.115	16	0	3	13	7	0	3	4	Active	Active	9.15	7.4	0.373909	0.128305
higher RPS in liver	15	56123510	ENSSSCG00000033634	ERI1	11.9514	7.26854	2.54731e-07	4.68375	9	0	2	7	5	0	2	3	Active	Active	22.05	6.35	1.88654	2.02996e-15
higher RPS in liver	15	59946605	ENSSSCG00000035546	TMEM230	20.3905	17.279	3.00229e-05	3.1125	13	0	0	13	11	0	1	10	Inactive	Inactive	1.24	0.62	1.80878	0.293257
higher RPS in liver	15	61894984	ENSSSCG00000042602	Unknown	3.88524	0.812245	0.000342194	3.07125	6	0	0	6	1	0	0	1	Inactive	Inactive	0.08	0.05	-	-
higher RPS in liver	15	65088284	ENSSSCG00000021938	UPP2	3.61085	0	1.95943e-06	3.60625	3	0	3	0	0	0	0	0	Inactive	Inactive	884.23	0.01	16.639	4.44214e-51
higher RPS in liver	15	68325893	ENSSSCG00000032982	Unknown	3.77245	0	4.18358e-09	3.7675	3	0	0	3	0	0	0	0	Inactive	Inactive	0.29	0	-	-
higher RPS in liver	15	71498401	ENSSSCG00000025598	COBLL1	13.5539	3.89735	6.25206e-08	9.655	10	0	6	4	3	0	0	3	Active	Active	34.42	10.56	1.71602	1.5408e-09
higher RPS in liver	15	71824160	ENSSSCG00000015911	SCN3A	19.1439	6.59776	2.17549e-07	12.545	14	0	0	14	5	0	0	5	Inactive	Inactive	0.42	2.22	-2.16941	2.64151e-05
higher RPS in liver	15	71834389	ENSSSCG00000033662	Unknown	7.90305	0	1.90788e-08	7.89875	6	0	0	6	0	0	0	0	Inactive	Inactive	0.43	0	-	-
higher RPS in liver	15	74339708	ENSSSCG00000036153	Unknown	7.69458	0	1.80172e-08	7.69	6	0	0	6	0	0	0	0	Inactive	Inactive	0	0	-	-
higher RPS in liver	15	76902387	ENSSSCG00000038355	SP5	11.1444	6.26067	1.38474e-06	4.88375	9	0	0	9	5	0	2	3	Active	Active	3.79	0.22	4.35581	3.5093e-11
higher RPS in liver	15	78204157	ENSSSCG00000015954	DLX2	22.6158	17.4811	5.12426e-05	5.1375	18	0	0	18	13	0	1	12	Active	Active	0.02	0.02	-	-
higher RPS in liver	15	79127192	ENSSSCG00000048840	Unknown	29.298	19.3509	0.00583741	9.94875	54	0	9	45	35	1	4	30	Inactive	Inactive	0.12	0.61	-2.11211	0.0158312
higher RPS in liver	15	81091532	ENSSSCG00000038076	ATF2	7.02792	0.966308	2.42505e-08	6.0625	5	0	2	3	1	0	0	1	Inactive	Active	76.13	74.73	0.176876	0.270647
higher RPS in liver	15	81094488	ENSSSCG00000015973	ATP5MC3	7.02792	0.966308	2.42505e-08	6.0625	5	0	2	3	1	0	0	1	Active	Active	237.61	390	-0.729539	0.00142946
higher RPS in liver	15	94168210	ENSSSCG00000027157	SLC40A1	4.96765	0	1.27808e-10	4.96375	4	0	2	2	0	0	0	0	Inactive	Inactive	310.18	35.86	3.15399	5.3284e-14
higher RPS in liver	15	95015325	ENSSSCG00000016052	MFSD6	5.8939	0	1.74602e-07	5.88875	5	0	0	5	0	0	0	0	Active	Active	4.37	3.47	0.461563	0.0272817
higher RPS in liver	15	95140479	ENSSSCG00000016053	NEMP2	3.33379	0	5.62493e-06	3.32875	3	0	0	3	0	0	0	0	Active	Active	3.12	2.31	0.51032	0.0789165
higher RPS in liver	15	95299615	ENSSSCG00000041859	Unknown	5.36408	0	1.01395e-09	5.36	4	0	1	3	0	0	0	0	Inactive	Inactive	2.48	3.22	-0.14187	0.64911
higher RPS in liver	15	95513380	ENSSSCG00000016056	GLS	3.68274	0	3.28756e-07	3.67875	3	0	3	0	0	0	0	0	Active	Active	107.78	68.34	0.763978	0.000249844
higher RPS in liver	15	95763448	ENSSSCG00000016059	STAT4	13.255	0	6.82467e-10	13.25	9	0	0	9	0	0	0	0	Active	Active	2.32	1.4	0.912146	0.00016509
higher RPS in liver	15	95874411	ENSSSCG00000016061	MYO1B	10.0347	6.62852	7.7002e-06	3.40625	8	5	0	3	5	0	2	3	Active	Active	429.31	40.46	3.33192	2.5014e-84
higher RPS in liver	15	96176451	ENSSSCG00000045350	L1TD1	14.0474	8.0944	1.90129e-09	5.95625	10	0	0	10	5	0	0	5	Inactive	Inactive	0.28	0.52	-0.711452	0.129931
higher RPS in liver	15	96313903	ENSSSCG00000016062	NABP1	19.9919	4.01516	4.17444e-11	15.9763	15	0	6	9	3	0	1	2	Active	Active	12.35	6.69	1.02511	7.58434e-05
higher RPS in liver	15	98762521	ENSSSCG00000043415	Unknown	8.93873	0	1.00815e-08	8.93375	7	0	0	7	0	0	0	0	Inactive	Inactive	1.04	2.99	-1.31358	0.00931333
higher RPS in liver	15	101200920	ENSSSCG00000051570	Unknown	21.3194	12.3909	2.8455e-09	8.93	16	1	11	4	9	0	3	6	Inactive	Inactive	1.75	3.06	-0.608667	0.147157
higher RPS in liver	15	104396481	ENSSSCG00000016093	Unknown	8.99878	4.33449	5.15516e-08	4.665	6	0	2	4	3	0	0	3	Inactive	Inactive	0.33	0.22	-	-
higher RPS in liver	15	104656495	ENSSSCG00000016098	ORC2	6.39684	1.4603	6.47803e-07	4.935	5	4	0	1	1	0	1	0	Active	Active	36.01	22.54	0.779155	0.000979439
higher RPS in liver	15	104747567	ENSSSCG00000036339	FAM126B	12.2779	3.54482	1.15879e-07	8.73	10	5	0	5	3	0	1	2	Active	Active	29.53	36.37	-0.115606	0.469003
higher RPS in liver	15	104747678	ENSSSCG00000016100	NDUFB3	12.2779	3.54482	1.15879e-07	8.73	10	5	0	5	3	0	1	2	Active	Active	938.97	1235.54	-0.314144	0.12279
higher RPS in liver	15	104781615	ENSSSCG00000016101	CFLAR	3.40048	0	1.27106e-10	3.395	2	2	0	0	0	0	0	0	Active	Active	157.52	44.93	1.85682	7.33801e-15
higher RPS in liver	15	104858100	ENSSSCG00000026940	CASP10	17.1208	11.1835	1.64031e-06	5.9375	12	0	1	11	7	0	2	5	Active	Active	53.05	31.23	0.933453	8.88144e-07
higher RPS in liver	15	105893508	ENSSSCG00000033533	Unknown	14.3593	10.3845	6.47574e-07	3.975	10	0	7	3	7	0	0	7	Active	Active	2.8	1.63	0.990401	0.000872414
higher RPS in liver	15	105970427	ENSSSCG00000016113	BMPR2	30.592	16.7635	7.18653e-08	13.8287	20	0	12	8	12	0	0	12	Active	Active	78.6	94.7	-0.216436	0.118501
higher RPS in liver	15	106377555	ENSSSCG00000016115	ICA1L	14.9549	6.60495	1.39607e-08	8.3525	10	0	1	9	5	0	0	5	Active	Active	0.29	0.65	-1.25803	0.000196881
higher RPS in liver	15	106961096	ENSSSCG00000016119	RAPH1	12.2111	6.75325	6.04696e-08	5.4575	9	6	3	0	5	0	2	3	Inactive	Inactive	33.75	34.79	0.182003	0.464822
higher RPS in liver	15	110021195	ENSSSCG00000016133	MDH1B	3.03839	0	6.8063e-06	3.03375	3	0	1	2	0	0	0	0	Active	Active	0.34	0.72	-0.86843	0.0188484
higher RPS in liver	15	110021448	ENSSSCG00000016134	FASTKD2	3.03839	0	6.8063e-06	3.03375	3	0	1	2	0	0	0	0	Active	Active	21.84	23.66	-0.0262781	0.882707
higher RPS in liver	15	110921353	ENSSSCG00000016140	FZD5	53.1315	10.111	1.0125e-12	43.02	37	13	6	18	7	0	0	7	Active	Active	98.21	2.36	5.30695	1.64498e-77
higher RPS in liver	15	111185324	ENSSSCG00000016141	PLEKHM3	11.7545	4.03679	1.85199e-10	7.7175	8	0	2	6	3	0	0	3	Active	Active	7.47	8.53	-0.0515326	0.780868
higher RPS in liver	15	111233995	ENSSSCG00000036186	Unknown	7.94775	1.20457	9.74268e-09	6.74375	6	0	2	4	1	0	0	1	Inactive	Inactive	0.09	0	-	-
higher RPS in liver	15	117451261	ENSSSCG00000034282	ABCA12	3.32017	0	2.27361e-05	3.31625	3	0	1	2	0	0	0	0	Inactive	Inactive	0.06	0.05	-	-
higher RPS in liver	15	117731014	ENSSSCG00000016174	FN1	20.2374	0	1.45628e-09	20.2325	15	9	3	3	0	0	0	0	Active	Active	2290.32	496.37	2.17217	1.43218e-09
higher RPS in liver	15	118273680	ENSSSCG00000016175	MREG	7.79993	4.22106	4.67996e-10	3.57875	5	0	0	5	3	0	0	3	Active	Active	6.01	1.42	2.29747	1.89394e-09
higher RPS in liver	15	118822047	ENSSSCG00000035392	IGFBP2	14.3218	2.374	5.99251e-10	11.9488	10	0	2	8	2	0	0	2	Active	Active	835.75	22.5	5.01338	3.36408e-32
higher RPS in liver	15	120192235	ENSSSCG00000016182	RUFY4	11.2253	6.02486	1.01837e-06	5.2025	8	0	3	5	4	0	0	4	Active	Inactive	0.05	0.04	-	-
higher RPS in liver	15	120260374	ENSSSCG00000016183	CXCR2	6.41689	0	2.67684e-09	6.41125	4	0	0	4	0	0	0	0	Inactive	Inactive	1.03	0.56	1.13209	0.248297
higher RPS in liver	15	120336488	ENSSSCG00000022483	GPBAR1	7.77444	1.82988	7.08618e-06	5.945	5	0	3	2	2	1	1	0	Active	Active	2.16	0.11	4.81082	8.01882e-07
higher RPS in liver	15	120365007	ENSSSCG00000016186	TMBIM1	15.9581	12.0387	1.00796e-07	3.92	9	0	1	8	7	0	0	7	Active	Active	274.09	177.35	0.618119	0.0182014
higher RPS in liver	15	121067210	ENSSSCG00000016203	CFAP65	5.67098	1.33259	1.39086e-09	4.34	4	0	0	4	1	0	0	1	Inactive	Inactive	0.08	0.07	-	-
higher RPS in liver	15	121090121	ENSSSCG00000016204	IHH	12.4319	7.24023	1.59779e-07	5.19125	8	0	0	8	5	0	0	5	Active	Active	7.48	0.01	9.53019	3.75034e-19
higher RPS in liver	15	121190062	ENSSSCG00000016205	NHEJ1	17.7956	11.7515	5.81027e-08	6.045	12	0	3	9	7	0	0	7	Inactive	Inactive	10.9	11.56	-0.174969	0.436774
higher RPS in liver	15	131226714	ENSSSCG00000016261	SP110	5.7175	0	1.21507e-09	5.71375	4	0	0	4	0	0	0	0	Active	Active	32.4	12.1	1.4154	4.94984e-05
higher RPS in liver	15	131222198	ENSSSCG00000050847	Unknown	5.51292	1.39787	1.17921e-06	4.115	4	0	1	3	1	0	0	1	Inactive	Inactive	2.26	2.55	0.0806075	0.763581
higher RPS in liver	15	131614740	ENSSSCG00000016267	ITM2C	3.17227	0	9.68818e-09	3.16875	2	0	1	1	0	0	0	0	Active	Active	82.18	40.27	1.03104	0.00248473
higher RPS in liver	15	131738177	ENSSSCG00000016269	SPATA3	7.14887	0	1.64942e-09	7.14375	5	0	0	5	0	0	0	0	Active	Active	0.38	0.47	-	-
higher RPS in liver	15	132127396	ENSSSCG00000033015	B3GNT7	10.5609	1.32424	5.23278e-09	9.23625	7	0	2	5	1	0	0	1	Active	Active	1.79	0.21	2.96247	2.65304e-09
higher RPS in liver	15	134282842	ENSSSCG00000016315	SPP2	6.35909	0	8.53993e-08	6.35375	4	0	0	4	0	0	0	0	Active	Inactive	2076.29	1.22	10.7702	3.59465e-239
higher RPS in liver	15	134622025	ENSSSCG00000034293	ARL4C	20.2484	16.945	4.39668e-06	3.30625	13	0	5	8	11	0	3	8	Active	Active	8.07	4.18	0.941286	0.00281662
higher RPS in liver	15	137567282	ENSSSCG00000027723	UBE2F-SCLY	7.36184	1.27717	7.45307e-08	6.085	5	0	0	5	1	0	0	1	Active	Active	72.06	57.35	0.364238	0.0944047
higher RPS in liver	15	137637071	ENSSSCG00000016334	SCLY	5.78167	1.49997	8.20697e-07	4.28	4	0	0	4	1	0	0	1	Active	Active	45.4	6.52	2.63824	1.94384e-23
higher RPS in liver	15	139118892	ENSSSCG00000051581	Unknown	21.8195	17.3956	0.000192996	4.42625	14	0	0	14	10	0	0	10	Inactive	Active	0.02	0	-	-
higher RPS in liver	15	139154859	ENSSSCG00000037123	Unknown	14.8614	8.97533	1.87391e-05	5.88625	12	0	0	12	6	0	0	6	Inactive	Inactive	0	0	-	-
higher RPS in liver	15	139180919	ENSSSCG00000044233	Unknown	17.5956	10.9263	0.00206145	6.66875	13	0	0	13	8	0	1	7	Inactive	Active	0.22	0.85	-1.77003	1.12417e-06
higher RPS in liver	15	139192603	ENSSSCG00000045609	Unknown	19.2408	13.3824	0.00251187	5.8575	13	0	0	13	9	0	1	8	Inactive	Inactive	0.24	0.21	-	-
higher RPS in liver	15	139243612	ENSSSCG00000038936	Unknown	21.9941	17.7877	0.0153524	4.205	18	0	0	18	14	0	1	13	Inactive	Inactive	0	0	-	-
higher RPS in liver	15	139720612	ENSSSCG00000016402	AGXT	7.01216	0.81663	4.65098e-05	6.195	7	0	1	6	1	0	0	1	Active	Active	528.69	0.84	9.08112	1.59669e-107
higher RPS in liver	9	1297972	ENSSSCG00000039647	EIF3F	6.86058	0	2.04846e-11	6.85625	4	0	0	4	0	0	0	0	Active	Active	188.42	428.01	-1.20748	1.47879e-09
higher RPS in liver	9	1659587	ENSSSCG00000044445	Unknown	27.8338	22.2489	0.00440439	5.58625	29	0	0	29	23	0	0	23	Inactive	Inactive	2.75	0.23	3.80285	6.06487e-18
higher RPS in liver	9	1869510	ENSSSCG00000050053	OR5P2	11.0073	6.23026	1.90069e-05	4.775	7	0	0	7	4	0	0	4	Inactive	Inactive	0	0	-	-
higher RPS in liver	9	3419472	ENSSSCG00000033806	GPR148	8.38209	4.78166	7.26647e-05	3.60125	10	0	2	8	5	0	0	5	Active	Active	0.01	0.04	-	-
higher RPS in liver	9	3442616	ENSSSCG00000014630	CNGA4	8.93035	1.05464	5.42505e-06	7.8725	7	0	1	6	1	0	0	1	Active	Active	0.35	0.55	-0.372727	0.521583
higher RPS in liver	9	3446075	ENSSSCG00000014632	FAM160A2	11.3836	3.30008	4.7795e-07	8.08375	9	0	1	8	3	0	0	3	Active	Active	10.61	24.15	-1.20586	0.000288614
higher RPS in liver	9	3510567	ENSSSCG00000044868	Unknown	18.8906	13.7277	0.00728953	5.16	18	0	4	14	13	0	0	13	Inactive	Inactive	0	0	-	-
higher RPS in liver	9	3523170	ENSSSCG00000040404	OR56B4	22.4088	19.3269	0.000814927	3.08125	14	0	4	10	12	0	0	12	Inactive	Inactive	0	0	-	-
higher RPS in liver	9	3533926	ENSSSCG00000014639	OR56A1	37.9969	29.3643	0.00495154	8.6325	33	0	5	28	28	0	1	27	Inactive	Inactive	0	0	-	-
higher RPS in liver	9	3583717	ENSSSCG00000047710	Unknown	19.4395	12.405	0.00218995	7.0325	16	0	0	16	10	0	0	10	Inactive	Inactive	0.05	0	-	-
higher RPS in liver	9	3624914	ENSSSCG00000048497	OR52E4	15.3444	11.4558	0.0040582	3.89125	12	0	0	12	8	0	0	8	Inactive	Inactive	0.03	0	-	-
higher RPS in liver	9	3631937	ENSSSCG00000041574	OR52N2	18.1729	14.6989	0.0127274	3.4725	16	0	1	15	13	0	0	13	Inactive	Inactive	0	0	-	-
higher RPS in liver	9	3695900	ENSSSCG00000049817	OR56B2P	20.9516	17.7081	0.0183302	3.24375	16	0	3	13	15	0	0	15	Inactive	Inactive	0	0	-	-
higher RPS in liver	9	3748821	ENSSSCG00000050910	OR56A5	17.5295	12.226	1.51407e-05	5.3025	13	0	3	10	9	0	0	9	Inactive	Inactive	0.01	0	-	-
higher RPS in liver	9	3756253	ENSSSCG00000046786	OR56A5	18.5286	12.4759	0.000775671	6.0525	16	0	2	14	11	0	1	10	Inactive	Inactive	0	0	-	-
higher RPS in liver	9	3802784	ENSSSCG00000049791	Unknown	22.2958	17.6557	6.61205e-07	4.64	13	0	2	11	10	0	0	10	Inactive	Inactive	0.01	0	-	-
higher RPS in liver	9	3810146	ENSSSCG00000041301	Unknown	32.3692	22.7248	4.34245e-05	9.645	25	0	3	22	17	0	0	17	Inactive	Inactive	0.06	0	-	-
higher RPS in liver	9	3896183	ENSSSCG00000050291	OR56A5	27.3125	23.1616	0.0309167	4.15125	20	0	1	19	17	0	0	17	Inactive	Inactive	0.02	0	-	-
higher RPS in liver	9	3925030	ENSSSCG00000048134	OR52N2	14.7263	10.9619	0.00251497	3.765	14	0	0	14	11	0	0	11	Inactive	Inactive	0	0	-	-
higher RPS in liver	9	3989699	ENSSSCG00000039589	OR56B2P	30.9179	24.0665	0.0276689	6.8525	39	0	4	35	27	0	0	27	Inactive	Inactive	0	0	-	-
higher RPS in liver	9	4193804	ENSSSCG00000031506	OR52B4	4.73793	1.66069	0.000250799	3.07625	5	0	1	4	2	0	0	2	Inactive	Inactive	0.02	0.33	-	-
higher RPS in liver	9	4845995	ENSSSCG00000014728	OR51B4	4.40031	0	0.000165189	4.3975	5	0	0	5	0	0	0	0	Inactive	Inactive	0.01	0	-	-
higher RPS in liver	9	4918867	ENSSSCG00000041678	OR52A1	19.3005	16.1475	0.0138213	3.15125	12	0	0	12	11	0	0	11	Inactive	Inactive	0.02	0	-	-
higher RPS in liver	9	4936832	ENSSSCG00000027566	Unknown	17.8972	13.4492	0.000116625	4.4475	11	0	0	11	8	0	0	8	Active	Inactive	0.02	0	-	-
higher RPS in liver	9	5039118	ENSSSCG00000032783	Unknown	18.9123	15.4688	1.11382e-06	3.445	12	0	0	12	9	0	0	9	Active	Inactive	0	0	-	-
higher RPS in liver	9	5706895	ENSSSCG00000033239	OR52M1	8.07172	5.04214	2.99646e-06	3.03	5	0	0	5	3	0	0	3	Inactive	Inactive	0.08	0	-	-
higher RPS in liver	9	6319669	ENSSSCG00000035653	PGAP2	4.97363	1.93221	0.00176938	3.04125	5	0	2	3	2	0	0	2	Active	Active	12.82	10.97	8.89811e-05	0.999761
higher RPS in liver	9	6319586	ENSSSCG00000014794	NUP98	4.97363	1.93221	0.00176938	3.04125	5	0	2	3	2	0	0	2	Active	Active	35.45	63.94	-0.778549	5.30353e-07
higher RPS in liver	9	7332771	ENSSSCG00000014818	STARD10	10.3445	6.69708	3.87256e-07	3.64625	6	0	0	6	4	0	0	4	Active	Active	101.83	14.08	2.79907	9.97313e-38
higher RPS in liver	9	7347001	ENSSSCG00000014819	ATG16L2	12.1682	7.86439	3.50721e-06	4.305	8	0	0	8	5	0	0	5	Active	Active	6.18	2.8	1.07516	3.55038e-05
higher RPS in liver	9	7619926	ENSSSCG00000014820	FCHSD2	24.4616	18.9924	9.90171e-05	5.46625	17	0	8	9	14	0	4	10	Active	Active	25.01	11.27	1.16953	4.62796e-06
higher RPS in liver	9	8278905	ENSSSCG00000014831	PAAF1	3.24031	0	6.6501e-05	3.23375	3	0	0	3	0	0	0	0	Active	Active	35.5	33.77	0.0874168	0.641486
higher RPS in liver	9	8821817	ENSSSCG00000029323	KCNE3	7.58389	2.91441	4.22405e-08	4.67125	5	0	5	0	2	0	2	0	Active	Active	21.96	10.87	0.878468	0.0117009
higher RPS in liver	9	9389009	ENSSSCG00000023029	OR2AT4	3.77662	0	2.07856e-07	3.77125	3	0	0	3	0	0	0	0	Inactive	Inactive	0.02	0	-	-
higher RPS in liver	9	9409148	ENSSSCG00000025925	Unknown	14.2827	1.10793	9.60101e-11	13.175	10	0	0	10	1	0	0	1	Inactive	Inactive	0.06	0	-	-
higher RPS in liver	9	9597959	ENSSSCG00000014852	ARRB1	6.33088	3.21945	1.08325e-06	3.11375	4	0	0	4	2	0	0	2	Active	Active	12.39	18.36	-0.568913	0.000128967
higher RPS in liver	9	9616456	ENSSSCG00000014855	RPS3	18.8479	14.6835	3.22003e-08	4.16375	11	0	0	11	8	0	0	8	Inactive	Inactive	2322.2	2291.46	-0.0722668	0.63862
higher RPS in liver	9	10951561	ENSSSCG00000032723	ACER3	11.192	7.28849	8.03143e-07	3.905	8	0	0	8	5	0	0	5	Active	Active	17.87	19.08	0.0368146	0.852707
higher RPS in liver	9	12479909	ENSSSCG00000033822	THRSP	3.40361	0	0.000122663	3.39875	3	1	1	1	0	0	0	0	Active	Active	355.26	41.76	2.97646	8.1195e-08
higher RPS in liver	9	20104632	ENSSSCG00000014913	PICALM	28.9963	7.74511	1.18185e-11	21.2512	22	0	4	18	6	0	1	5	Inactive	Inactive	354.62	210.17	0.833948	1.43709e-05
higher RPS in liver	9	21761473	ENSSSCG00000014924	CTSC	3.73146	0	8.3263e-08	3.7275	3	0	3	0	0	0	0	0	Active	Active	183.02	43.64	2.11961	2.23452e-14
higher RPS in liver	9	28371198	ENSSSCG00000034879	MAML2	28.1856	16.7451	1.23533e-06	11.4413	22	11	7	4	12	0	10	2	Active	Active	6.37	7.14	-0.0807901	0.755308
higher RPS in liver	9	28407774	ENSSSCG00000014972	CCDC82	15.6607	6.40893	6.54054e-09	9.25375	12	5	1	6	5	0	2	3	Active	Active	26.55	12.16	1.21987	0.000292461
higher RPS in liver	9	28407438	ENSSSCG00000034924	JRKL	15.6607	6.40893	6.54054e-09	9.25375	12	5	1	6	5	0	2	3	Active	Active	16.61	9.5	0.928194	2.85676e-07
higher RPS in liver	9	31720605	ENSSSCG00000014976	ARHGAP42	11.9575	5.26963	1.16593e-07	6.69	9	0	7	2	4	0	1	3	Active	Active	31.59	13.4	1.34724	4.5144e-09
higher RPS in liver	9	33160311	ENSSSCG00000031170	TMEM123	9.21821	5.46603	1.66158e-08	3.75125	7	0	0	7	4	0	0	4	Active	Active	178.53	40.1	2.1357	3.13598e-18
higher RPS in liver	9	36242405	ENSSSCG00000029651	SLN	5.10399	0	3.08135e-09	5.0975	4	0	0	4	0	0	0	0	Inactive	Active	0.08	4222.06	-17.5822	3.75964e-60
higher RPS in liver	9	37006396	ENSSSCG00000015010	EXPH5	3.41759	0	4.8844e-07	3.4125	3	0	0	3	0	0	0	0	Active	Active	12.2	2.66	2.02801	7.98007e-09
higher RPS in liver	9	37006590	ENSSSCG00000015011	Unknown	3.41759	0	4.8844e-07	3.4125	3	0	0	3	0	0	0	0	Active	Active	24.98	20.28	0.29542	0.123921
higher RPS in liver	9	38582242	ENSSSCG00000015015	ARHGAP20	11.732	3.52064	1.97242e-06	8.2125	11	3	1	7	3	0	0	3	Active	Active	1.76	4.41	-1.04165	3.77321e-05
higher RPS in liver	9	39071427	ENSSSCG00000015019	COLCA2	25.3833	4.14063	3.81817e-12	21.2425	17	12	0	5	3	0	0	3	Active	Inactive	27.95	1.12	4.65796	2.24513e-46
higher RPS in liver	9	39144606	ENSSSCG00000015016	POU2AF1	10.5161	0	1.73091e-08	10.5113	8	2	0	6	0	0	0	0	Inactive	Inactive	5.49	1.04	2.39023	6.49424e-23
higher RPS in liver	9	39368307	ENSSSCG00000015020	BTG4	44.0644	40.5746	0.00117711	3.49125	29	12	4	13	26	0	13	13	Active	Active	1.31	1.38	0.285385	0.34095
higher RPS in liver	9	39368598	ENSSSCG00000032941	SIK2	44.0644	40.5746	0.00117711	3.49125	29	12	4	13	26	0	13	13	Active	Active	15.4	29.55	-0.81222	0.00152474
higher RPS in liver	9	39619893	ENSSSCG00000015023	AP001781.2	8.9441	0	1.04939e-09	8.94	7	0	0	7	0	0	0	0	Active	Active	55.49	19.95	1.45336	2.23288e-17
higher RPS in liver	9	39612409	ENSSSCG00000015027	C11ORF1	11.8543	1.30821	6.44376e-11	10.5463	9	0	1	8	1	0	0	1	Inactive	Inactive	78.23	142.46	-0.838603	4.81022e-06
higher RPS in liver	9	39775398	ENSSSCG00000015031	PIH1D2	6.33116	0	2.39889e-07	6.32625	6	0	0	6	0	0	0	0	Active	Active	11.83	10.57	0.395973	0.26354
higher RPS in liver	9	39775676	ENSSSCG00000015044	NKAPD1	6.33116	0	2.39889e-07	6.32625	6	0	0	6	0	0	0	0	Active	Active	38.06	22.8	0.79375	1.47053e-05
higher RPS in liver	9	39790899	ENSSSCG00000023599	TIMM8B	12.069	0	2.09885e-09	12.0638	9	0	1	8	0	0	0	0	Active	Active	240.1	282.71	-0.182456	0.446886
higher RPS in liver	9	39790561	ENSSSCG00000015034	SDHD	12.069	0	2.09885e-09	12.0638	9	0	1	8	0	0	0	0	Active	Active	703.18	926.87	-0.409749	0.0443936
higher RPS in liver	9	39873300	ENSSSCG00000015037	IL18	10.4533	1.43396	7.35096e-11	9.01875	7	4	0	3	1	0	0	1	Active	Inactive	88.72	10.75	3.20376	5.5626e-19
higher RPS in liver	9	42103206	ENSSSCG00000041499	Unknown	17.5383	0	1.58772e-09	17.5325	13	0	2	11	0	0	0	0	Inactive	Active	3.33	4.64	-0.35518	0.318022
higher RPS in liver	9	42984879	ENSSSCG00000031831	CADM1	25.1894	8.70797	2.65415e-09	16.48	18	0	1	17	6	0	0	6	Active	Active	24.12	9.34	1.42473	1.18269e-08
higher RPS in liver	9	45172211	ENSSSCG00000015084	FXYD6-FXYD2	28.4487	21.9935	5.01535e-06	6.45375	20	0	2	18	16	0	5	11	Active	Active	159.77	11.83	3.54869	2.97647e-29
higher RPS in liver	9	45218098	ENSSSCG00000015083	FXYD6	9.79588	4.42023	5.40316e-06	5.37875	8	0	1	7	3	0	2	1	Active	Active	31	62.03	-1.00243	0.00735617
higher RPS in liver	9	45310457	ENSSSCG00000038710	TMPRSS13	9.13539	4.93575	9.2454e-08	4.2	7	0	3	4	4	0	3	1	Active	Active	0.15	0.18	-	-
higher RPS in liver	9	45310553	ENSSSCG00000015085	IL10RA	9.13539	4.93575	9.2454e-08	4.2	7	0	3	4	4	0	3	1	Active	Active	9.51	5.87	0.618335	0.0722623
higher RPS in liver	9	45479773	ENSSSCG00000029199	SCN4B	15.9309	2.8634	4.71553e-10	13.0675	12	0	3	9	2	0	1	1	Inactive	Active	1.32	76.33	-5.71942	7.856e-32
higher RPS in liver	9	45498465	ENSSSCG00000021651	SCN2B	16.5689	3.83268	1.9623e-10	12.7338	11	0	3	8	3	0	1	2	Inactive	Inactive	0.2	0.65	-1.26838	0.0266923
higher RPS in liver	9	45578185	ENSSSCG00000015091	MPZL2	4.92966	0	1.56201e-09	4.925	3	0	0	3	0	0	0	0	Active	Active	61.75	3.24	4.39899	9.32343e-30
higher RPS in liver	9	45619481	ENSSSCG00000040140	CD3E	11.0998	3.48587	3.69962e-08	7.61375	8	0	0	8	3	0	0	3	Inactive	Inactive	1.74	0.6	1.69776	0.00620617
higher RPS in liver	9	45644221	ENSSSCG00000015093	CD3D	10.6576	0	7.19905e-11	10.6525	8	0	0	8	0	0	0	0	Active	Inactive	4.68	2.53	1.09665	9.86759e-05
higher RPS in liver	9	45645292	ENSSSCG00000015095	UBE4A	15.263	2.52551	8.96059e-11	12.7375	11	0	1	10	2	0	2	0	Active	Inactive	6.71	0.1	6.22142	2.80054e-33
higher RPS in liver	9	45645364	ENSSSCG00000015094	CD3G	15.263	2.52551	8.96059e-11	12.7375	11	0	1	10	2	0	2	0	Active	Inactive	4.89	0.86	2.71839	2.98767e-09
higher RPS in liver	9	46063814	ENSSSCG00000015097	DDX6	15.7287	12.5844	0.000891185	3.14375	11	0	4	7	9	0	0	9	Active	Active	147.4	169.37	-0.0212658	0.908795
higher RPS in liver	9	46174589	ENSSSCG00000015099	BCL9L	13.6803	6.42494	8.26531e-07	7.25625	11	0	3	8	5	0	0	5	Active	Active	4.57	15.97	-1.76065	4.98886e-08
higher RPS in liver	9	46200489	ENSSSCG00000015100	UPK2	33.9302	26.6509	1.07574e-05	7.28	24	0	5	19	18	0	1	17	Inactive	Active	0.04	0	-	-
higher RPS in liver	9	46891233	ENSSSCG00000015125	NECTIN1	24.3375	18.7056	5.91116e-06	5.63375	17	4	1	12	13	0	7	6	Active	Active	11.3	2.68	2.08503	1.86211e-11
higher RPS in liver	9	47376853	ENSSSCG00000028237	POU2F3	19.6536	13.3389	4.65964e-06	6.315	13	0	3	10	9	0	2	7	Active	Active	1.02	0.83	0.468426	0.185961
higher RPS in liver	9	47475805	ENSSSCG00000015129	ARHGEF12	30.7134	25.7913	1.60081e-06	4.925	21	0	7	14	18	0	4	14	Active	Active	93.6	102.79	-0.106497	0.469041
higher RPS in liver	9	47639971	ENSSSCG00000015131	GRIK4	18.8412	11.3855	1.18995e-09	7.45375	14	0	1	13	8	0	5	3	Active	Active	1.03	0.89	0.094675	0.717848
higher RPS in liver	9	48120802	ENSSSCG00000023728	TECTA	6.33117	0	6.65631e-11	6.32625	5	0	5	0	0	0	0	0	Active	Active	103.34	17.85	2.66072	4.05592e-25
higher RPS in liver	9	49630793	ENSSSCG00000015136	UBASH3B	16.8304	6.76024	2.90337e-10	10.0687	11	0	7	4	5	0	5	0	Active	Active	16.39	10.78	0.808788	0.000308225
higher RPS in liver	9	49826501	ENSSSCG00000015138	JHY	4.55846	0	1.53211e-06	4.555	4	0	0	4	0	0	0	0	Active	Active	0.85	0.9	0.0791563	0.789479
higher RPS in liver	9	50816307	ENSSSCG00000044352	Unknown	19.1369	15.6302	0.00435642	3.50625	12	0	0	12	10	0	0	10	Active	Inactive	0	0	-	-
higher RPS in liver	9	51310769	ENSSSCG00000040171	Unknown	16.7345	13.3727	3.85081e-05	3.36125	12	0	0	12	9	0	0	9	Inactive	Inactive	0.04	0	-	-
higher RPS in liver	9	51406009	ENSSSCG00000044649	OR8B3	10.9346	7.3552	0.00621997	3.5825	9	0	0	9	6	0	0	6	Inactive	Inactive	0.05	0	-	-
higher RPS in liver	9	51918827	ENSSSCG00000015196	SIAE	23.777	20.2685	3.40325e-05	3.51	17	0	1	16	14	0	3	11	Active	Active	26.1	15.24	0.774824	0.03086
higher RPS in liver	9	51918916	ENSSSCG00000015197	SPA17	23.777	20.2685	3.40325e-05	3.51	17	0	1	16	14	0	3	11	Active	Active	27.49	3.63	3.11298	5.86924e-09
higher RPS in liver	9	53400753	ENSSSCG00000015231	DCPS	17.7715	12.7738	3.82785e-07	5	13	0	1	12	9	0	0	9	Active	Active	222.98	77.77	1.49047	2.12596e-11
higher RPS in liver	9	55612902	ENSSSCG00000015237	FLI1	5.30527	0	1.76158e-07	5.3	5	0	0	5	0	0	0	0	Active	Active	22.68	25.45	-0.160559	0.47789
higher RPS in liver	9	55836701	ENSSSCG00000021573	KCNJ5	7.67247	4.35139	4.41878e-07	3.32125	5	0	5	0	3	0	0	3	Active	Active	0.72	0.19	1.87935	3.27069e-06
higher RPS in liver	9	56261494	ENSSSCG00000036157	BARX2	25.0094	20.4591	1.35795e-07	4.55	17	0	3	14	14	0	6	8	Active	Active	0.06	1.92	-5.16646	6.51037e-11
higher RPS in liver	9	63620228	ENSSSCG00000026160	MROH9	5.26906	1.21695	0.00380255	4.0525	7	0	1	6	2	0	0	2	Inactive	Inactive	0.05	0	-	-
higher RPS in liver	9	63812103	ENSSSCG00000015267	FMO2	13.1132	1.36414	3.29086e-08	11.75	11	0	3	8	1	0	0	1	Inactive	Inactive	0.92	6.77	-2.61879	7.08712e-08
higher RPS in liver	9	63812103	ENSSSCG00000015268	FMO1	13.1132	1.36414	3.29086e-08	11.75	11	0	3	8	1	0	0	1	Inactive	Inactive	1599.8	59.79	4.4331	1.26906e-20
higher RPS in liver	9	64073859	ENSSSCG00000015270	FMOD	18.2472	11.3056	7.12307e-07	6.94125	14	6	2	6	8	0	2	6	Active	Active	15.48	140.1	-3.20082	4.26867e-13
higher RPS in liver	9	64731969	ENSSSCG00000015277	SOX13	10.4024	0.492931	9.01017e-08	9.9075	9	1	3	5	1	0	0	1	Active	Active	3.05	6.76	-1.19796	0.000133322
higher RPS in liver	9	64822636	ENSSSCG00000031235	REN	9.64697	2.90804	8.72362e-07	6.74	8	1	3	4	2	0	2	0	Active	Inactive	0.12	0.14	-	-
higher RPS in liver	9	64853610	ENSSSCG00000038350	KISS1	21.8902	16.8458	4.15363e-05	5.04375	15	0	6	9	12	0	5	7	Active	Active	25.64	0.24	6.67391	3.02869e-94
higher RPS in liver	9	65027293	ENSSSCG00000015281	PLEKHA6	7.55307	1.27184	2.34524e-07	6.27875	6	0	1	5	1	0	0	1	Active	Active	6.89	3.41	1.08933	1.04555e-06
higher RPS in liver	9	65502252	ENSSSCG00000022951	NFASC	6.74419	0	6.04501e-10	6.73875	5	0	2	3	0	0	0	0	Active	Active	0.26	1.17	-2.47797	1.93982e-10
higher RPS in liver	9	66323173	ENSSSCG00000025182	ELK4	3.05304	0	1.56256e-09	3.04875	2	0	1	1	0	0	0	0	Inactive	Inactive	36.86	54.7	-0.454178	0.00271802
higher RPS in liver	9	67116530	ENSSSCG00000037428	Unknown	6.52384	2.93427	9.40466e-07	3.59125	5	0	0	5	2	0	0	2	Inactive	Inactive	0	0	-	-
higher RPS in liver	9	67157167	ENSSSCG00000031970	RASSF5	11.5465	4.26797	2.74873e-08	7.2775	8	0	5	3	3	0	0	3	Active	Active	30.55	7.97	1.86131	8.21958e-33
higher RPS in liver	9	72185727	ENSSSCG00000015313	KRIT1	7.67522	0	3.77953e-08	7.67125	6	0	2	4	0	0	0	0	Active	Active	59.12	49.88	0.225973	0.422251
higher RPS in liver	9	72354902	ENSSSCG00000027356	Unknown	3.92519	0	5.89204e-10	3.92	3	0	0	3	0	0	0	0	Inactive	Inactive	0.01	0.04	-	-
higher RPS in liver	9	73792693	ENSSSCG00000036385	BET1	3.61847	0	1.59219e-08	3.615	3	0	0	3	0	0	0	0	Active	Active	302.13	83.4	1.92602	1.39181e-18
higher RPS in liver	9	73792794	ENSSSCG00000050264	Unknown	3.61847	0	1.59219e-08	3.615	3	0	0	3	0	0	0	0	Active	Active	24.47	18.13	0.435026	0.164782
higher RPS in liver	9	74473898	ENSSSCG00000015328	SGCE	9.37937	3.12559	0.000273156	6.25625	9	0	6	3	3	0	2	1	Active	Active	146.01	61.41	1.40567	5.74321e-06
higher RPS in liver	9	74474058	ENSSSCG00000036049	PEG10	9.37937	3.12559	0.000273156	6.25625	9	0	6	3	3	0	2	1	Active	Active	343.52	40.47	3.40871	1.99649e-33
higher RPS in liver	9	74974724	ENSSSCG00000015332	PON1	7.97924	0	7.03595e-08	7.97375	6	0	4	2	0	0	0	0	Active	Active	773	1.21	9.3774	3.92786e-12
higher RPS in liver	9	76699561	ENSSSCG00000023850	Unknown	6.35857	0	1.66991e-08	6.355	5	0	2	3	0	0	0	0	Active	Active	14.2	12.46	0.346486	0.249767
higher RPS in liver	9	82225272	ENSSSCG00000032709	ARL4A	14.1649	5.07564	5.52557e-08	9.0875	11	0	0	11	4	0	0	4	Active	Active	50.87	8.35	2.64287	5.14527e-21
higher RPS in liver	9	86511369	ENSSSCG00000030484	AHR	14.7639	0	1.65568e-10	14.7587	12	6	3	3	0	0	0	0	Active	Active	96.99	15.54	2.74796	8.19252e-40
higher RPS in liver	9	91506340	ENSSSCG00000020970	IL6	12.2053	1.29854	4.50647e-09	10.9062	9	0	6	3	1	0	0	1	Active	Active	0.87	0.74	0.38923	0.697924
higher RPS in liver	9	92372069	ENSSSCG00000029174	CCDC126	4.91942	1.17817	2.66453e-06	3.74375	4	0	0	4	1	0	0	1	Active	Active	31.16	6.53	2.36012	6.23484e-19
higher RPS in liver	9	92823561	ENSSSCG00000024485	RUNDC3B	6.46879	2.56009	2.75199e-07	3.90875	5	0	3	2	2	0	0	2	Active	Active	2.81	1.53	1.10307	0.000619853
higher RPS in liver	9	93463042	ENSSSCG00000015393	DMTF1	11.1965	4.89295	4.57218e-10	6.3	8	0	2	6	4	0	0	4	Active	Active	23.3	30.97	-0.295089	0.0869637
higher RPS in liver	9	95591703	ENSSSCG00000042154	Unknown	10.4239	4.1717	1.23513e-07	6.25375	8	0	0	8	3	0	0	3	Active	Active	0.61	2.13	-1.655	0.0149048
higher RPS in liver	9	99519372	ENSSSCG00000031405	Unknown	37.3975	23.486	0.000139094	13.9125	39	0	5	34	20	0	1	19	Inactive	Inactive	0	0.92	NA	NA
higher RPS in liver	9	100272625	ENSSSCG00000015407	GNAI1	6.74726	1.91913	1.2931e-05	4.8275	6	0	0	6	2	0	0	2	Active	Active	66.88	40.73	0.72666	0.00413717
higher RPS in liver	9	103963965	ENSSSCG00000015426	RELN	8.4712	0	1.58142e-08	8.46625	7	0	1	6	0	0	0	0	Active	Active	56.4	8.43	2.67149	3.36527e-49
higher RPS in liver	9	106678651	ENSSSCG00000051587	Unknown	5.45808	0	5.6553e-11	5.4525	4	3	0	1	0	0	0	0	Inactive	Inactive	0.75	0.67	0.436971	0.274564
higher RPS in liver	9	106851018	ENSSSCG00000037706	PRKAR2B	6.06355	0.409303	8.50869e-06	5.65	5	5	0	0	1	0	0	1	Active	Active	100.99	8.06	3.75222	1.7521e-30
higher RPS in liver	9	106965947	ENSSSCG00000035673	HBP1	13.9162	3.93255	3.48068e-09	9.98375	11	0	6	5	3	0	2	1	Active	Active	250.58	109.12	1.16491	0.00218452
higher RPS in liver	9	107205411	ENSSSCG00000015442	GPR22	7.02434	1.27841	9.98533e-08	5.745	6	0	0	6	1	0	0	1	Inactive	Inactive	0.07	0	-	-
higher RPS in liver	9	108693106	ENSSSCG00000023584	TRGV1	7.5112	3.38099	8.8127e-07	4.12875	5	0	0	5	2	0	0	2	Inactive	Inactive	4.81	0.68	3.21643	0.000285895
higher RPS in liver	9	112341044	ENSSSCG00000045606	Unknown	3.84532	0	0.000531756	3.84	5	0	1	4	0	0	0	0	Inactive	Inactive	0.14	0.08	-	-
higher RPS in liver	9	113489877	ENSSSCG00000044037	OR2A2	3.64456	0	5.95085e-07	3.63875	3	0	2	1	0	0	0	0	Inactive	Inactive	0.04	0.03	-	-
higher RPS in liver	9	114916855	ENSSSCG00000015485	SUCO	4.08624	0	1.18549e-08	4.08125	3	0	0	3	0	0	0	0	Active	Active	80.88	35.61	1.29357	1.88362e-07
higher RPS in liver	9	116193201	ENSSSCG00000015493	SERPINC1	3.48102	0	2.96206e-06	3.47625	3	0	1	2	0	0	0	0	Active	Inactive	8575	2.23	11.839	5.94342e-236
higher RPS in liver	9	117063680	ENSSSCG00000015504	CACYBP	7.25183	4.19871	3.68179e-07	3.0525	5	0	0	5	3	0	0	3	Active	Active	142.87	252.26	-0.731688	0.00116228
higher RPS in liver	9	117148049	ENSSSCG00000031435	MRPS14	7.85194	0	5.5665e-06	7.8475	7	0	2	5	0	0	0	0	Inactive	Inactive	46.95	43.54	0.141785	0.475574
higher RPS in liver	9	119941862	ENSSSCG00000015519	RASAL2	10.5784	5.37687	6.29182e-06	5.2025	8	0	0	8	4	0	0	4	Active	Active	12.44	22.2	-0.589163	0.0108404
higher RPS in liver	9	120859949	ENSSSCG00000015525	TOR3A	12.5505	8.51655	3.2113e-05	4.03375	10	0	0	10	6	0	0	6	Active	Active	24.43	13.25	1.09718	1.45872e-07
higher RPS in liver	9	120985119	ENSSSCG00000024674	ABL2	5.90961	0	2.88734e-05	5.90375	6	0	1	5	0	0	0	0	Active	Active	12.42	18.62	-0.366648	0.150013
higher RPS in liver	9	121516610	ENSSSCG00000035741	TOR1AIP2	4.31441	0	1.21138e-07	4.30875	3	0	0	3	0	0	0	0	Active	Active	69.94	19.47	1.89434	2.49185e-22
higher RPS in liver	9	121515973	ENSSSCG00000029261	Unknown	4.31441	0	1.21138e-07	4.30875	3	0	0	3	0	0	0	0	Active	Active	91.53	59.19	0.68014	0.000310088
higher RPS in liver	9	121515570	ENSSSCG00000032621	TOR1AIP1	4.31441	0	1.21138e-07	4.30875	3	0	0	3	0	0	0	0	Active	Active	57.79	50.84	0.181466	0.442428
higher RPS in liver	9	122592532	ENSSSCG00000015540	MR1	11.8263	8.75831	5.47998e-05	3.06875	8	0	4	4	6	0	0	6	Active	Active	1.8	2.06	-0.0200467	0.953679
higher RPS in liver	9	123910432	ENSSSCG00000015549	RNASEL	32.7995	25.34	3.03237e-07	7.46	22	2	5	15	16	0	12	4	Active	Active	5.82	4.24	0.739012	0.194373
higher RPS in liver	9	124093539	ENSSSCG00000039986	RGS8	25.8603	14.7891	2.42753e-08	11.0725	19	0	1	18	10	0	0	10	Active	Active	0.24	0.35	-	-
higher RPS in liver	9	124093603	ENSSSCG00000022292	NPL	25.8603	14.7891	2.42753e-08	11.0725	19	0	1	18	10	0	0	10	Active	Active	95.73	4.6	4.41547	2.59679e-15
higher RPS in liver	9	124093667	ENSSSCG00000026806	DHX9	25.8603	14.7891	2.42753e-08	11.0725	19	0	1	18	10	0	0	10	Active	Active	117.83	135.81	0.109722	0.706515
higher RPS in liver	9	127858884	ENSSSCG00000015579	PTGS2	5.54996	1.9061	0.00139869	3.64625	5	0	0	5	2	0	0	2	Active	Active	1.68	1.08	0.713103	0.0329311
higher RPS in liver	9	127859051	ENSSSCG00000023351	PLA2G4A	5.54996	1.9061	0.00139869	3.64625	5	0	0	5	2	0	0	2	Active	Active	23.97	10.7	1.23733	0.00230688
higher RPS in liver	9	129012218	ENSSSCG00000015581	CENPF	6.40597	1.30252	7.88297e-08	5.1025	5	0	1	4	1	0	0	1	Active	Active	64.21	11.8	2.54384	0.00826064
higher RPS in liver	9	129580979	ENSSSCG00000015584	PROX1	9.8154	0	1.09365e-09	9.8125	7	7	0	0	0	0	0	0	Active	Active	51.45	6.53	3.09697	4.50688e-15
higher RPS in liver	9	131076561	ENSSSCG00000015599	PPP2R5A	27.985	19.5558	8.44363e-07	8.43125	21	5	9	7	14	0	7	7	Active	Active	123.09	95.98	0.285062	0.171088
higher RPS in liver	9	131060794	ENSSSCG00000045296	Unknown	30.2548	24.3862	9.67487e-07	5.8675	21	1	9	11	17	0	4	13	Inactive	Inactive	2.29	2.74	-0.0549896	0.88487
higher RPS in liver	9	131275451	ENSSSCG00000015600	DTL	16.7795	10.654	1.69387e-07	6.12625	13	0	1	12	8	0	0	8	Active	Active	8.78	3.75	1.29212	0.000481918
higher RPS in liver	9	131275678	ENSSSCG00000015602	INTS7	16.7795	10.654	1.69387e-07	6.12625	13	0	1	12	8	0	0	8	Active	Active	37.25	37.05	0.15767	0.275903
higher RPS in liver	9	131313694	ENSSSCG00000015603	LPGAT1	5.57888	2.21395	0.000723575	3.365	5	0	2	3	2	0	0	2	Inactive	Inactive	210.32	41.34	2.31785	3.06071e-26
higher RPS in liver	9	136186744	ENSSSCG00000015627	ZPBP	5.31557	1.34719	1.10379e-08	3.96875	4	0	2	2	1	0	1	0	Active	Active	1.36	3.01	-1.00659	0.0735329
higher RPS in liver	9	136188226	ENSSSCG00000015628	SPATA48	5.31557	1.34719	1.10379e-08	3.96875	4	0	2	2	1	0	1	0	Inactive	Inactive	0.06	0.16	-	-
higher RPS in liver	8	413896	ENSSSCG00000045703	RNF212	3.75428	0	2.27429e-06	3.75	3	0	0	3	0	0	0	0	Active	Active	0.39	1.07	-1.45813	0.00411902
higher RPS in liver	8	441221	ENSSSCG00000032808	Unknown	13.1091	9.13352	0.000135856	3.97375	9	0	0	9	6	0	0	6	Inactive	Active	1.68	3.18	-0.699924	0.295274
higher RPS in liver	8	451179	ENSSSCG00000039488	SPON2	11.769	7.50049	0.000165966	4.26875	10	0	0	10	6	0	0	6	Active	Active	40.98	39.84	0.1284	0.703402
higher RPS in liver	8	495984	ENSSSCG00000031302	CTBP1	7.10777	3.07924	4.88364e-07	4.02875	5	0	0	5	2	0	0	2	Active	Active	65.84	56.92	0.202374	0.414266
higher RPS in liver	8	826192	ENSSSCG00000008678	SLBP	18.6111	5.81472	4.25533e-10	12.7963	13	0	2	11	5	0	0	5	Active	Active	119.69	65.24	0.80865	2.73535e-05
higher RPS in liver	8	824999	ENSSSCG00000008677	TACC3	5.76659	0.680318	1.40881e-07	5.085	4	0	0	4	1	0	0	1	Active	Active	10.57	2.43	1.90289	0.000186042
higher RPS in liver	8	926607	ENSSSCG00000008675	LETM1	4.47008	0	4.82776e-10	4.465	3	0	1	2	0	0	0	0	Active	Active	33.63	56.27	-0.725675	0.0113011
higher RPS in liver	8	1039127	ENSSSCG00000008681	NELFA	14.9402	2.79402	1.57437e-11	12.1438	10	0	2	8	2	0	0	2	Active	Active	21.76	38.61	-0.911036	0.000385767
higher RPS in liver	8	1938397	ENSSSCG00000040111	MSANTD1	4.92088	0	2.23528e-05	4.915	4	0	0	4	0	0	0	0	Inactive	Active	0.41	0.79	-0.871175	0.00556174
higher RPS in liver	8	2077176	ENSSSCG00000008700	HGFAC	14.7765	10.5046	0.00019933	4.2725	10	0	5	5	6	0	0	6	Active	Active	824.83	0.32	11.3893	1.09395e-196
higher RPS in liver	8	2089670	ENSSSCG00000008702	DOK7	12.7232	9.44201	0.000656838	3.28125	9	0	6	3	6	0	0	6	Active	Active	9.38	36.8	-1.84787	1.11145e-05
higher RPS in liver	8	2441075	ENSSSCG00000008720	HMX1	11.3137	1.80407	1.78202e-06	9.51125	9	0	0	9	2	0	0	2	Inactive	Active	0.02	0.04	-	-
higher RPS in liver	8	2642524	ENSSSCG00000032151	CPZ	21.4401	16.9929	0.00192607	4.445	16	0	1	15	12	0	0	12	Active	Active	2.21	22.42	-3.12286	4.01317e-11
higher RPS in liver	8	3828102	ENSSSCG00000029624	TADA2B	16.9963	5.84637	2.76899e-05	11.1512	14	0	10	4	5	0	0	5	Active	Active	9.15	10.22	-0.137125	0.506081
higher RPS in liver	8	3929059	ENSSSCG00000027349	TBC1D14	29.091	12.9785	8.09231e-08	16.11	20	1	3	16	9	0	0	9	Active	Active	21.61	26.35	-0.296753	0.0607076
higher RPS in liver	8	3828680	ENSSSCG00000028085	Unknown	16.9963	5.84637	2.76899e-05	11.1512	14	0	10	4	5	0	0	5	Active	Active	0.36	0.14	-	-
higher RPS in liver	8	5632608	ENSSSCG00000008727	MSX1	5.88507	1.51845	7.73228e-06	4.36875	5	0	0	5	1	0	0	1	Active	Active	5.49	2.79	0.917794	0.071547
higher RPS in liver	8	5890764	ENSSSCG00000038731	STX18	3.03956	0	5.16249e-06	3.03375	2	0	0	2	0	0	0	0	Active	Active	71.88	30.94	1.18885	3.50984e-09
higher RPS in liver	8	6367990	ENSSSCG00000031700	SLC2A9	7.4863	0	2.09355e-09	7.48	5	0	0	5	0	0	0	0	Inactive	Inactive	0.34	1.07	-1.53441	0.000300148
higher RPS in liver	8	9182693	ENSSSCG00000034181	NKX3-2	9.79645	4.20379	5.44196e-09	5.59375	7	0	0	7	3	0	0	3	Active	Active	0.04	0.04	-	-
higher RPS in liver	8	10401296	ENSSSCG00000038410	CPEB2	4.96956	0	5.53898e-08	4.96625	4	0	3	1	0	0	0	0	Active	Active	19.68	3.27	2.66474	5.70463e-17
higher RPS in liver	8	11011241	ENSSSCG00000028359	BST1	11.5306	2.56801	2.35978e-10	8.96125	9	0	0	9	2	0	1	1	Active	Active	20.15	7.79	1.35159	0.000407425
higher RPS in liver	8	12969296	ENSSSCG00000008748	LCORL	3.67147	0	3.04501e-08	3.6675	3	0	3	0	0	0	0	0	Active	Active	32.98	14.39	1.31689	9.38637e-08
higher RPS in liver	8	29013082	ENSSSCG00000008771	C4ORF19	14.3894	2.54835	2.15332e-08	11.8425	10	0	5	5	2	0	1	1	Active	Active	68.23	0.46	7.34966	1.04397e-100
higher RPS in liver	8	30114602	ENSSSCG00000008785	FAM114A1	13.3392	9.71118	3.1858e-06	3.62625	10	0	5	5	7	0	2	5	Active	Active	62.73	55.38	0.219329	0.318845
higher RPS in liver	8	31321113	ENSSSCG00000008794	RHOH	11.7593	0	3.47164e-10	11.7525	8	0	8	0	0	0	0	0	Inactive	Inactive	8.47	2.07	2.2508	1.70786e-08
higher RPS in liver	8	32301975	ENSSSCG00000022168	APBB2	39.0096	31.1977	8.89563e-07	7.81375	28	0	7	21	21	12	3	6	Active	Active	30.7	74.7	-1.28771	1.16597e-05
higher RPS in liver	8	36978547	ENSSSCG00000035621	GABRB1	3.06065	0	1.76638e-06	3.05375	3	0	0	3	0	0	0	0	Active	Active	0.11	0.18	-	-
higher RPS in liver	8	37809761	ENSSSCG00000008813	CORIN	26.174	10.1101	3.54203e-09	16.0625	17	4	4	9	7	0	0	7	Active	Active	24.38	0.38	6.26369	5.55951e-56
higher RPS in liver	8	38182182	ENSSSCG00000008820	TEC	16.0232	0	1.94585e-08	16.0175	12	0	6	6	0	0	0	0	Active	Active	24.14	2.82	3.32544	1.69598e-31
higher RPS in liver	8	38924015	ENSSSCG00000048210	Unknown	27.8277	18.1962	0.000204419	9.63	25	0	5	20	17	0	2	15	Inactive	Inactive	0.05	0.15	-	-
higher RPS in liver	8	39581727	ENSSSCG00000036284	USP46	7.41724	0	3.81079e-08	7.41375	6	0	6	0	0	0	0	0	Active	Active	26.17	18.75	0.476624	0.000703681
higher RPS in liver	8	40967493	ENSSSCG00000008841	PDGFRA	27.3829	18.8367	1.17718e-10	8.545	19	0	7	12	12	0	7	5	Active	Active	37.36	126.52	-1.68435	3.61442e-10
higher RPS in liver	8	42024370	ENSSSCG00000008845	SRD5A3	17.4198	7.19321	5.07781e-07	10.2287	14	0	3	11	5	0	0	5	Active	Active	18.32	17.78	0.0966021	0.538547
higher RPS in liver	8	42099871	ENSSSCG00000034355	MRPL32	9.75659	0.983762	0.000838148	8.77125	18	0	2	16	2	0	0	2	Inactive	Inactive	41.64	26.35	0.772694	0.000203636
higher RPS in liver	8	42130972	ENSSSCG00000038095	Unknown	12.374	9.19912	0.0129932	3.1775	10	0	0	10	7	0	0	7	Active	Active	5.04	6.53	-0.239349	0.162658
higher RPS in liver	8	45808748	ENSSSCG00000024960	PDGFC	9.56253	2.56739	5.70089e-08	6.99375	8	0	5	3	2	0	0	2	Active	Active	26.31	29.68	0.070209	0.862332
higher RPS in liver	8	47148509	ENSSSCG00000044745	Unknown	19.1835	7.58139	3.07515e-05	11.6013	20	0	1	19	9	0	0	9	Inactive	Inactive	0.54	0.47	0.535974	0.37478
higher RPS in liver	8	47702748	ENSSSCG00000008878	PPID	7.07273	2.4888	3.85757e-06	4.585	6	0	6	0	2	0	0	2	Active	Active	108.14	118.52	-0.00367271	0.986123
higher RPS in liver	8	47702578	ENSSSCG00000031175	FNIP2	7.07273	2.4888	3.85757e-06	4.585	6	0	6	0	2	0	0	2	Active	Active	10.28	10.46	0.117805	0.37934
higher RPS in liver	8	52055296	ENSSSCG00000050630	Unknown	22.9194	11.3366	0.00474106	11.5825	40	0	1	39	19	0	0	19	Inactive	Inactive	1.66	0.05	5.20315	8.88243e-09
higher RPS in liver	8	52059859	ENSSSCG00000050729	Unknown	22.9194	11.3366	0.00474106	11.5825	40	0	1	39	19	0	0	19	Inactive	Inactive	0	0.25	-	-
higher RPS in liver	8	55645504	ENSSSCG00000027403	AASDH	5.98299	0	1.68803e-05	5.97625	5	0	1	4	0	0	0	0	Active	Active	26.03	30.07	-0.199531	0.0659668
higher RPS in liver	8	55728887	ENSSSCG00000043888	Unknown	3.85007	0	1.0419e-06	3.8475	4	0	1	3	0	0	0	0	Active	Active	5.32	5.81	0.00101998	0.995933
higher RPS in liver	8	55729116	ENSSSCG00000008900	SRP72	3.85007	0	1.0419e-06	3.8475	4	0	1	3	0	0	0	0	Active	Active	224.45	110.27	1.07389	1.10825e-08
higher RPS in liver	8	55763239	ENSSSCG00000008899	ARL9	7.91176	1.18796	1.37054e-07	6.72375	6	0	2	4	1	0	0	1	Active	Active	1.71	4.96	-1.36681	9.76991e-06
higher RPS in liver	8	55787215	ENSSSCG00000032353	THEGL	14.5171	9.36952	2.86293e-06	5.14625	11	1	2	8	7	0	4	3	Inactive	Inactive	0.56	0.01	5.93791	0.00155615
higher RPS in liver	8	55989574	ENSSSCG00000038107	SPINK2	21.3024	6.97407	1.47638e-09	14.3287	16	0	0	16	5	0	0	5	Active	Inactive	10.08	0.12	7.96159	4.94999e-11
higher RPS in liver	8	58902051	ENSSSCG00000049794	Unknown	9.00333	1.41695	0.000213699	7.58375	13	0	0	13	2	0	0	2	Inactive	Inactive	0.22	0.49	-	-
higher RPS in liver	8	59200411	ENSSSCG00000046730	Unknown	13.8726	4.21221	0.000506133	9.66	22	0	0	22	7	0	0	7	Inactive	Inactive	0.02	0	-	-
higher RPS in liver	8	65488925	ENSSSCG00000008924	UBA6	23.9144	4.6258	3.0066e-09	19.2875	17	0	2	15	4	0	0	4	Inactive	Inactive	49.55	19.82	1.50331	3.53062e-14
higher RPS in liver	8	65623914	ENSSSCG00000008926	TMPRSS11D	5.5583	1.231	4.75102e-09	4.32875	4	0	1	3	1	0	0	1	Inactive	Inactive	0.08	0	-	-
higher RPS in liver	8	65683866	ENSSSCG00000008927	TMPRSS11A	13.6346	0	4.87849e-10	13.63	10	2	0	8	0	0	0	0	Inactive	Inactive	0.07	0.04	-	-
higher RPS in liver	8	66324051	ENSSSCG00000039276	UGT2B31	18.024	3.86608	9.85721e-07	14.1575	17	0	4	13	5	0	0	5	Active	Inactive	1560.72	0.41	12.1509	0
higher RPS in liver	8	66372277	ENSSSCG00000037521	Unknown	6.02999	1.29685	0.000606962	4.7325	7	0	2	5	2	0	0	2	Inactive	Inactive	35.72	0.02	11.9899	8.21227e-10
higher RPS in liver	8	66599132	ENSSSCG00000022724	Unknown	26.7867	9.66367	1.58882e-06	17.125	25	0	3	22	9	0	0	9	Active	Inactive	247.87	0.53	8.93033	4.41495e-149
higher RPS in liver	8	66689654	ENSSSCG00000034976	UGT2A3	6.5945	0	1.22966e-08	6.59	5	0	3	2	0	0	0	0	Inactive	Inactive	263.03	7.44	5.17973	2.69833e-70
higher RPS in liver	8	66868566	ENSSSCG00000036508	Unknown	20.8039	0	1.07148e-11	20.8	15	0	0	15	0	0	0	0	Inactive	Inactive	0	0	-	-
higher RPS in liver	8	66888214	ENSSSCG00000009262	CSN1S1	6.04226	0	6.5243e-07	6.03625	5	0	0	5	0	0	0	0	Inactive	Inactive	0.29	0.55	-1.80238	0.554939
higher RPS in liver	8	66922641	ENSSSCG00000009261	CSN2	4.01484	0.712193	2.45922e-05	3.3	4	0	0	4	1	0	0	1	Inactive	Inactive	0.05	0	-	-
higher RPS in liver	8	67058472	ENSSSCG00000009266	ODAM	6.82036	0	3.9217e-08	6.815	6	0	0	6	0	0	0	0	Inactive	Inactive	0.24	0.21	-	-
higher RPS in liver	8	68360262	ENSSSCG00000027609	GC	20.0943	0	4.60274e-09	20.0888	15	0	4	11	0	0	0	0	Active	Inactive	4678.92	1.21	11.8696	7.11157e-195
higher RPS in liver	8	69677684	ENSSSCG00000008949	AFP	14.5311	0	1.34296e-10	14.5262	10	4	1	5	0	0	0	0	Active	Inactive	31578	1.63	13.9501	9.14887e-21
higher RPS in liver	8	69706890	ENSSSCG00000008950	AFM	15.9206	0	2.03856e-10	15.9162	11	3	0	8	0	0	0	0	Active	Inactive	1945.52	0.27	13.1603	1.3844e-11
higher RPS in liver	8	69932643	ENSSSCG00000008953	CXCL8	20.7182	5.23008	2.86058e-08	15.4887	16	0	3	13	4	0	3	1	Inactive	Inactive	5.24	0.32	4.58046	5.82116e-10
higher RPS in liver	8	70054888	ENSSSCG00000008959	CXCL2	3.0205	0	2.06316e-05	3.015	3	0	1	2	0	0	0	0	Active	Active	21.44	12.64	0.944813	0.10973
higher RPS in liver	8	70179658	ENSSSCG00000008961	MTHFD2L	17.2989	3.93238	6.75928e-10	13.37	13	0	1	12	3	0	1	2	Active	Active	15.93	17.88	-0.0691941	0.845048
higher RPS in liver	8	70351309	ENSSSCG00000038185	EREG	8.51305	3.91488	2.43976e-07	4.59875	7	0	3	4	3	0	0	3	Active	Active	12.35	3.82	1.81526	3.37203e-10
higher RPS in liver	8	70788193	ENSSSCG00000008966	PARM1	35.6074	20.8296	6.93061e-12	14.7775	26	0	1	25	14	0	2	12	Active	Active	8.58	11.66	-0.579945	0.0540164
higher RPS in liver	8	71725674	ENSSSCG00000008978	CXCL11	6.08329	2.63158	9.32735e-06	3.45125	4	0	4	0	2	0	0	2	Active	Inactive	18.9	0.32	6.38518	5.12847e-05
higher RPS in liver	8	73069098	ENSSSCG00000046008	Unknown	26.5671	5.28507	4.42591e-10	21.285	19	0	0	19	4	0	0	4	Inactive	Inactive	1.42	2.18	-0.475013	0.166274
higher RPS in liver	8	73071295	ENSSSCG00000036445	CXCL13	14.7032	2.54825	6.49801e-10	12.155	10	0	0	10	2	0	0	2	Inactive	Inactive	3.45	2.38	0.765312	0.438087
higher RPS in liver	8	73089676	ENSSSCG00000049617	Unknown	3.7802	0	5.49081e-07	3.775	3	0	0	3	0	0	0	0	Inactive	Inactive	2.48	1.28	1.09741	0.000300787
higher RPS in liver	8	74553105	ENSSSCG00000024314	FGG	13.2197	0	4.15676e-06	13.215	9	0	0	9	0	0	0	0	Active	Inactive	68444.3	3.24	14.555	1.39188e-49
higher RPS in liver	8	74574882	ENSSSCG00000008998	FGA	8.4213	0	4.61886e-07	8.415	5	0	0	5	0	0	0	0	Active	Inactive	35556.5	2.7	13.8272	1.12034e-29
higher RPS in liver	8	74607360	ENSSSCG00000008997	FGB	14.7532	0	8.73897e-11	14.7462	8	0	2	6	0	0	0	0	Active	Inactive	76480.1	5.5	13.939	7.29159e-181
higher RPS in liver	8	74664598	ENSSSCG00000026886	DCHS2	5.10463	1.21855	2.04235e-08	3.88375	4	0	2	2	1	0	1	0	Active	Active	0.03	3.06	-7.83236	6.78451e-45
higher RPS in liver	8	75383978	ENSSSCG00000042379	Unknown	10.5968	2.69312	2.80009e-09	7.90375	7	0	0	7	2	0	0	2	Inactive	Inactive	1.47	2.03	-0.283744	0.32549
higher RPS in liver	8	77689537	ENSSSCG00000009018	SH3D19	3.40975	0	4.09587e-06	3.40375	3	0	0	3	0	0	0	0	Active	Active	32.68	22.24	0.603722	0.0157652
higher RPS in liver	8	82864826	ENSSSCG00000009039	MMAA	12.0309	8.48231	7.07009e-07	3.54875	9	0	0	9	6	0	2	4	Active	Active	13.98	9.41	0.623837	0.000912111
higher RPS in liver	8	93220544	ENSSSCG00000042175	Unknown	4.51736	0.912591	0.000735449	3.60125	8	0	0	8	2	0	0	2	Inactive	Inactive	0.17	0.37	-	-
higher RPS in liver	8	96856011	ENSSSCG00000034280	LARP1B	4.02507	0	8.38559e-10	4.02125	3	0	2	1	0	0	0	0	Active	Active	69.43	64	0.132147	0.325823
higher RPS in liver	8	96924927	ENSSSCG00000009074	ABHD18	4.03642	0	1.76604e-10	4.03375	3	0	0	3	0	0	0	0	Active	Active	43.88	31.04	0.510536	0.111478
higher RPS in liver	8	100863446	ENSSSCG00000009083	SPRY1	26.6524	16.2733	2.10222e-08	10.3775	20	0	7	13	12	0	5	7	Active	Active	30.02	96.27	-1.64152	1.29545e-19
higher RPS in liver	8	112232191	ENSSSCG00000042004	Unknown	5.35245	1.29796	2.04039e-07	4.055	4	0	0	4	1	0	1	0	Inactive	Inactive	3.53	11.96	-1.56371	5.39881e-06
higher RPS in liver	8	112867073	ENSSSCG00000039813	COL25A1	10.5786	0	7.21842e-09	10.575	9	0	1	8	0	0	0	0	Active	Active	0.61	1.25	-0.609845	0.26094
higher RPS in liver	8	113284950	ENSSSCG00000044815	Unknown	35.9182	10.4353	2.30998e-05	25.4825	46	2	3	41	16	0	0	16	Inactive	Inactive	0.24	1.59	-6.3187	8.62122e-12
higher RPS in liver	8	113363049	ENSSSCG00000009144	ETNPPL	5.49223	0	1.0952e-07	5.4875	4	4	0	0	0	0	0	0	Active	Active	301.45	0.14	11.258	1.39935e-75
higher RPS in liver	8	113824547	ENSSSCG00000009148	LEF1	7.15985	0	4.47203e-08	7.15625	6	1	4	1	0	0	0	0	Inactive	Inactive	3.2	2.28	0.592793	0.132371
higher RPS in liver	8	116199137	ENSSSCG00000021764	ARHGEF38	8.95491	0	2.71065e-06	8.94875	7	0	7	0	0	0	0	0	Active	Active	14.86	0.21	6.17436	4.06575e-23
higher RPS in liver	8	117889009	ENSSSCG00000023296	CENPE	9.31423	0	6.61635e-07	9.31	8	0	0	8	0	0	0	0	Active	Active	61.44	8.35	2.98775	0.000108182
higher RPS in liver	8	117969998	ENSSSCG00000022282	BDH2	9.93963	5.09416	1.43017e-05	4.8425	7	0	0	7	4	0	0	4	Active	Active	170.24	65.3	1.45049	1.1431e-10
higher RPS in liver	8	120701340	ENSSSCG00000039327	DAPP1	11.3606	8.02354	0.000291011	3.3375	9	0	3	6	5	0	1	4	Active	Active	5.65	1.97	1.80886	3.40525e-06
higher RPS in liver	8	121266652	ENSSSCG00000009181	C4ORF17	17.2343	0	2.49993e-10	17.2288	13	8	0	5	0	0	0	0	Active	Active	24.99	0.88	4.98006	1.17799e-67
higher RPS in liver	8	121171669	ENSSSCG00000042058	Unknown	10.6626	0	1.65057e-07	10.6587	8	8	0	0	0	0	0	0	Inactive	Inactive	19.02	0	6.22711	0.000183897
higher RPS in liver	8	121266764	ENSSSCG00000009185	ADH5	17.2343	0	2.49993e-10	17.2288	13	8	0	5	0	0	0	0	Active	Active	1142.6	172.76	2.79881	6.86102e-36
higher RPS in liver	8	130527451	ENSSSCG00000009208	HERC3	7.49935	1.29199	3.40448e-07	6.21	6	0	3	3	1	1	0	0	Active	Active	12.97	18.37	-0.450144	0.00372701
higher RPS in liver	8	130527610	ENSSSCG00000009211	Unknown	7.49935	1.29199	3.40448e-07	6.21	6	0	3	3	1	1	0	0	Active	Active	42.48	85.29	-0.987835	1.43754e-08
higher RPS in liver	8	130665145	ENSSSCG00000021712	HERC6	29.448	22.7059	1.12114e-06	6.74125	20	0	6	14	15	1	11	3	Active	Active	60.13	54.02	0.247077	0.751223
higher RPS in liver	8	131058932	ENSSSCG00000009217	PKD2	7.49577	1.99018	5.25235e-05	5.505	7	0	2	5	2	0	0	2	Active	Active	15.31	38.09	-1.25089	4.68436e-12
higher RPS in liver	8	131472785	ENSSSCG00000009220	DMP1	10.6261	0	2.37569e-09	10.6225	8	5	0	3	0	0	0	0	Active	Active	91.59	33.89	1.33984	0.00412915
higher RPS in liver	8	131472761	ENSSSCG00000009221	DSPP	10.6261	0	2.37569e-09	10.6225	8	5	0	3	0	0	0	0	Active	Active	26.96	13.13	1.51991	0.0100244
higher RPS in liver	8	131472576	ENSSSCG00000009225	HSD17B11	10.6261	0	2.37569e-09	10.6225	8	5	0	3	0	0	0	0	Active	Active	1970.13	15.43	6.94486	2.60984e-108
higher RPS in liver	8	138790126	ENSSSCG00000027722	BMP2K	5.93547	1.2458	2.78988e-09	4.69125	4	0	2	2	1	0	1	0	Active	Active	28.11	24.53	0.323137	0.0378014
higher RPS in liver	3	634437	ENSSSCG00000007547	ADAP1	22.0845	18.8361	0.0061491	3.245	15	0	0	15	12	0	0	12	Active	Active	5.78	9.61	-0.742044	0.0029126
higher RPS in liver	3	701757	ENSSSCG00000007552	Unknown	13.1753	5.61701	5.10148e-06	7.5575	10	0	0	10	4	0	0	4	Active	Active	0.39	9.14	-4.49213	5.85347e-16
higher RPS in liver	3	712160	ENSSSCG00000026422	GPER1	6.06344	2.25136	1.37505e-05	3.815	5	0	0	5	2	0	0	2	Active	Active	0.47	2.17	-2.25643	2.34303e-06
higher RPS in liver	3	3968369	ENSSSCG00000022553	TNRC18	4.03282	0	1.79784e-06	4.02875	3	0	2	1	0	0	0	0	Inactive	Active	6.58	14.25	-1.07594	0.000421021
higher RPS in liver	3	4079558	ENSSSCG00000038526	FBXL18	16.8513	10.8934	8.24117e-07	5.9575	12	7	0	5	8	0	0	8	Active	Active	3.8	9.9	-1.45316	0.000108335
higher RPS in liver	3	6790315	ENSSSCG00000038518	Unknown	6.32806	0	4.96473e-05	6.3225	6	0	0	6	0	0	0	0	Inactive	Inactive	0.36	0	-	-
higher RPS in liver	3	7442033	ENSSSCG00000032056	MPV17L	6.48951	0	5.65391e-11	6.48375	5	0	1	4	0	0	0	0	Active	Inactive	17.82	1.58	3.52842	4.68112e-41
higher RPS in liver	3	7837546	ENSSSCG00000007637	TRIM4	10.4388	0	6.27315e-07	10.435	11	0	0	11	0	0	0	0	Active	Active	17.85	13.03	0.446342	0.000275372
higher RPS in liver	3	7848761	ENSSSCG00000007636	GJC3	4.18215	0	6.78368e-09	4.17625	4	0	1	3	0	0	0	0	Inactive	Active	0.96	4.28	-2.08293	1.72452e-18
higher RPS in liver	3	7982865	ENSSSCG00000037215	ZNF3	7.9797	2.88897	3.0437e-06	5.09375	6	0	0	6	2	0	0	2	Active	Active	17.25	25.04	-0.415409	0.00534445
higher RPS in liver	3	7982892	ENSSSCG00000034893	COPS6	7.9797	2.88897	3.0437e-06	5.09375	6	0	0	6	2	0	0	2	Active	Active	161.35	166.6	0.0209278	0.900791
higher RPS in liver	3	8026972	ENSSSCG00000034153	TAF6	4.03189	0	2.67023e-09	4.0275	3	0	0	3	0	0	0	0	Active	Active	13.4	32.89	-1.44011	1.00105e-09
higher RPS in liver	3	8027043	ENSSSCG00000034092	MBLAC1	4.03189	0	2.67023e-09	4.0275	3	0	0	3	0	0	0	0	Active	Active	29.87	24.62	0.350324	0.157699
higher RPS in liver	3	8027053	ENSSSCG00000032054	CNPY4	4.03189	0	2.67023e-09	4.0275	3	0	0	3	0	0	0	0	Active	Active	15.93	9.11	0.872301	2.02456e-05
higher RPS in liver	3	8175646	ENSSSCG00000007649	GPC2	8.53499	3.44769	1.67638e-05	5.08625	7	0	1	6	3	0	0	3	Active	Active	0.35	0.19	-	-
higher RPS in liver	3	8176139	ENSSSCG00000007650	STAG3	8.53499	3.44769	1.67638e-05	5.08625	7	0	1	6	3	0	0	3	Active	Active	2.36	0.26	3.34531	7.10231e-10
higher RPS in liver	3	8358487	ENSSSCG00000007659	ZCWPW1	8.8822	2.75234	6.49832e-08	6.12875	7	0	0	7	2	0	0	2	Active	Active	2.34	1.03	1.1679	0.00640873
higher RPS in liver	3	8357289	ENSSSCG00000023680	MEPCE	8.8822	2.75234	6.49832e-08	6.12875	7	0	0	7	2	0	0	2	Active	Active	50.31	58.66	-0.246113	0.199143
higher RPS in liver	3	8406218	ENSSSCG00000025164	TSC22D4	18.4749	15.1832	2.60105e-05	3.29375	12	1	0	11	10	0	0	10	Active	Active	22.55	64.56	-1.57883	6.88155e-10
higher RPS in liver	3	8408729	ENSSSCG00000030337	NYAP1	18.4749	15.1832	2.60105e-05	3.29375	12	1	0	11	10	0	0	10	Active	Active	2.19	2.73	-0.381694	0.301013
higher RPS in liver	3	8523449	ENSSSCG00000027466	PCOLCE	12.0077	5.4085	1.87772e-05	6.5975	10	1	0	9	4	0	0	4	Active	Active	37.44	365.19	-3.4174	9.1787e-42
higher RPS in liver	3	8531155	ENSSSCG00000023255	MOSPD3	6.60355	1.40811	3.63571e-09	5.19375	4	0	0	4	1	0	0	1	Active	Active	15.04	12.53	0.0554007	0.797787
higher RPS in liver	3	8578884	ENSSSCG00000007671	TFR2	5.38366	0	4.03376e-11	5.3775	4	0	0	4	0	0	0	0	Active	Active	427.33	0.62	9.23807	4.52683e-215
higher RPS in liver	3	8579122	ENSSSCG00000007669	GNB2	5.38366	0	4.03376e-11	5.3775	4	0	0	4	0	0	0	0	Active	Active	263.36	191.05	0.382171	0.0888782
higher RPS in liver	3	8600125	ENSSSCG00000007668	GIGYF1	12.2381	5.97141	5.64448e-08	6.26625	9	0	0	9	4	0	0	4	Active	Active	11.72	20.1	-0.867237	0.000378734
higher RPS in liver	3	8620508	ENSSSCG00000007673	EPO	10.8897	2.84896	1.58893e-07	8.04125	8	0	0	8	2	0	0	2	Active	Active	1.1	0	6.6546	9.87377e-05
higher RPS in liver	3	8697439	ENSSSCG00000023619	SLC12A9	9.00904	4.22323	8.60242e-08	4.78875	6	2	1	3	3	0	1	2	Active	Active	10.09	5.07	0.867804	7.90537e-08
higher RPS in liver	3	8731848	ENSSSCG00000041835	UFSP1	23.3974	8.98954	9.3849e-09	14.4075	16	0	3	13	6	0	1	5	Active	Active	28.01	19.96	0.390123	0.289314
higher RPS in liver	3	8739149	ENSSSCG00000030303	ACHE	25.277	21.7961	0.000258831	3.48125	16	0	3	13	15	0	2	13	Active	Active	0.72	9.68	-3.66871	1.43007e-17
higher RPS in liver	3	9668818	ENSSSCG00000007682	SH2B2	43.5201	35.3262	1.67049e-06	8.195	30	0	0	30	24	0	5	19	Inactive	Active	2.33	7.37	-1.59981	2.27591e-12
higher RPS in liver	3	10186116	ENSSSCG00000020910	TMEM120A	17.0701	11.4676	1.08945e-09	5.60625	11	0	0	11	7	0	0	7	Inactive	Inactive	0.03	0	-	-
higher RPS in liver	3	10281833	ENSSSCG00000038320	POR	5.42112	0	8.45486e-11	5.415	4	0	4	0	0	0	0	0	Inactive	Inactive	158.18	40.41	1.72833	4.45689e-07
higher RPS in liver	3	10309622	ENSSSCG00000040182	RHBDD2	38.1068	31.7374	3.77164e-06	6.3675	24	0	11	13	20	0	1	19	Active	Active	10.77	12.26	-0.439881	0.147783
higher RPS in liver	3	11039706	ENSSSCG00000007718	CLDN4	3.22861	0	1.45917e-08	3.22375	2	0	1	1	0	0	0	0	Inactive	Inactive	166.62	2.23	6.19131	7.14482e-59
higher RPS in liver	3	16941739	ENSSSCG00000036659	NIPSNAP2	8.47112	4.11027	2.13845e-06	4.36	6	0	0	6	3	0	0	3	Active	Active	99.96	950.84	-3.23424	3.62742e-107
higher RPS in liver	3	16950793	ENSSSCG00000007749	MRPS17	10.2391	2.74326	3.62303e-07	7.49375	8	0	0	8	2	0	0	2	Active	Active	121.87	101.19	0.344666	0.233712
higher RPS in liver	3	17053333	ENSSSCG00000045912	OR7A17	5.13207	0	1.20299e-06	5.12625	4	0	0	4	0	0	0	0	Inactive	Inactive	2.74	4.45	-0.526842	0.154793
higher RPS in liver	3	17060348	ENSSSCG00000037878	AHSP	7.36342	0	4.01069e-09	7.3575	5	0	0	5	0	0	0	0	Active	Inactive	317.99	12.51	4.85771	5.30839e-14
higher RPS in liver	3	17065818	ENSSSCG00000007753	RUSF1	9.63227	0	2.70507e-08	9.6275	7	0	1	6	0	0	0	0	Active	Active	14.63	7.87	0.86549	0.000127917
higher RPS in liver	3	17089388	ENSSSCG00000024058	SLC5A2	4.91246	0	1.36731e-07	4.90875	4	0	1	3	0	0	0	0	Inactive	Inactive	0.13	0.13	-	-
higher RPS in liver	3	17108365	ENSSSCG00000025245	ARMC5	6.84553	2.86032	9.36963e-08	3.985	5	0	1	4	2	0	0	2	Active	Active	3.5	3.97	-0.337364	0.287116
higher RPS in liver	3	17306738	ENSSSCG00000007757	TRIM72	17.1811	13.7742	0.000278002	3.40375	12	0	2	10	9	0	0	9	Active	Active	1.67	330.4	-7.60939	9.71811e-147
higher RPS in liver	3	17306179	ENSSSCG00000040811	PYCARD	17.1811	13.7742	0.000278002	3.40375	12	0	2	10	9	0	0	9	Active	Active	17.73	9.43	0.973389	0.0651703
higher RPS in liver	3	17406624	ENSSSCG00000026817	ZNF646	3.76169	0	1.38876e-06	3.75625	3	0	0	3	0	0	0	0	Active	Active	3.19	8.01	-1.41582	3.12546e-10
higher RPS in liver	3	17406273	ENSSSCG00000007767	ZNF668	3.76169	0	1.38876e-06	3.75625	3	0	0	3	0	0	0	0	Active	Active	3.41	4.52	-0.489759	0.0824831
higher RPS in liver	3	18231844	ENSSSCG00000037193	TLCD3B	18.3731	13.6978	3.68928e-06	4.675	13	0	1	12	9	0	0	9	Inactive	Active	0.07	0.07	-	-
higher RPS in liver	3	18234787	ENSSSCG00000032556	ALDOA	18.3731	13.6978	3.68928e-06	4.675	13	0	1	12	9	0	0	9	Inactive	Inactive	108.7	5643.68	-5.62944	4.09875e-54
higher RPS in liver	3	18234787	ENSSSCG00000046707	Unknown	18.3731	13.6978	3.68928e-06	4.675	13	0	1	12	9	0	0	9	Inactive	Inactive	117.15	5190.48	-5.42799	1.90685e-69
higher RPS in liver	3	19576544	ENSSSCG00000007817	IL4R	13.8611	2.9544	1.38946e-11	10.9075	9	5	0	4	2	0	0	2	Active	Active	34.46	19.19	0.829455	1.21902e-05
higher RPS in liver	3	21503863	ENSSSCG00000031865	AQP8	16.0549	0.677787	3.83624e-07	15.3725	13	0	2	11	1	0	0	1	Active	Inactive	3.06	1.17	1.7079	0.000244095
higher RPS in liver	3	21593673	ENSSSCG00000007826	LCMT1	8.72644	1.244	0.000234327	7.48125	8	0	1	7	2	0	0	2	Active	Active	46.89	87.49	-0.941565	1.25903e-09
higher RPS in liver	3	21606643	ENSSSCG00000039712	LCMT1	11.8919	0	2.43679e-06	11.8875	9	0	2	7	0	0	0	0	Active	Active	2.92	5.46	-0.604534	0.736777
higher RPS in liver	3	22383264	ENSSSCG00000033674	PRKCB	5.90648	0.420783	6.47479e-07	5.4825	5	0	1	4	1	0	0	1	Active	Active	11.13	2.52	2.31633	7.69579e-15
higher RPS in liver	3	22740436	ENSSSCG00000010799	COG7	6.63935	0.434203	1.85903e-07	6.2025	5	0	0	5	1	0	0	1	Active	Active	18.27	28.49	-0.681337	0.000290875
higher RPS in liver	3	23013384	ENSSSCG00000007836	SCNN1G	14.5144	5.71547	3.76153e-08	8.7975	10	0	0	10	4	0	0	4	Active	Active	0.04	0.04	-	-
higher RPS in liver	3	24573103	ENSSSCG00000007847	Unknown	8.01712	0.601295	7.68776e-06	7.415	8	0	1	7	1	0	1	0	Inactive	Inactive	0.02	0.03	-	-
higher RPS in liver	3	25387817	ENSSSCG00000007858	ACSM2B	4.03747	0	6.93949e-08	4.035	3	0	1	2	0	0	0	0	Active	Inactive	177.25	1.02	7.57692	5.81815e-129
higher RPS in liver	3	26653792	ENSSSCG00000032531	SMG1	5.47007	0	4.65416e-10	5.465	4	0	0	4	0	0	0	0	Active	Active	31.57	52.49	-0.547561	0.00403359
higher RPS in liver	3	26776780	ENSSSCG00000035768	RPS15A	7.65583	1.25147	2.12388e-08	6.40625	6	0	5	1	1	0	0	1	Active	Active	1182.17	1316.03	-0.0511869	0.760432
higher RPS in liver	3	31133317	ENSSSCG00000037232	SNX29	8.20648	2.85878	1.31629e-09	5.34625	6	0	6	0	2	0	0	2	Active	Active	4.98	8.32	-0.626501	0.00336397
higher RPS in liver	3	31482353	ENSSSCG00000032381	LITAF	31.6425	27.8286	4.20532e-05	3.81125	20	0	4	16	18	13	2	3	Inactive	Inactive	144.26	34.51	2.08158	3.99951e-59
higher RPS in liver	3	32230780	ENSSSCG00000007901	CIITA	3.1617	0	0.00127257	3.15625	3	0	0	3	0	0	0	0	Inactive	Inactive	3.13	7.47	-1.14156	6.22377e-06
higher RPS in liver	3	32271848	ENSSSCG00000027101	TVP23A	4.40829	1.30831	0.00334993	3.1025	5	0	2	3	1	0	0	1	Inactive	Inactive	1.07	1.97	-0.712836	0.0169744
higher RPS in liver	3	32598855	ENSSSCG00000020675	ATF7IP2	5.52347	0	6.92977e-08	5.51875	4	0	0	4	0	0	0	0	Active	Active	6.26	2.4	1.5202	4.91173e-05
higher RPS in liver	3	32605181	ENSSSCG00000048012	Unknown	3.58265	0	0.000979716	3.57875	3	0	0	3	0	0	0	0	Inactive	Inactive	0.21	0.47	-	-
higher RPS in liver	3	32752351	ENSSSCG00000031290	GRIN2A	3.99137	0	1.02911e-07	3.9875	3	0	0	3	0	0	0	0	Inactive	Active	0.07	0.04	-	-
higher RPS in liver	3	33893396	ENSSSCG00000021236	PMM2	10.8721	5.93033	2.8481e-08	4.9425	7	0	1	6	4	0	1	3	Active	Active	44.15	27.66	0.645552	0.0020704
higher RPS in liver	3	33892598	ENSSSCG00000033311	TMEM186	10.8721	5.93033	2.8481e-08	4.9425	7	0	1	6	4	0	1	3	Active	Active	16.45	11.37	0.56576	0.000167837
higher RPS in liver	3	34015469	ENSSSCG00000007909	ABAT	4.32793	0	2.97819e-09	4.32375	3	0	1	2	0	0	0	0	Active	Active	61.37	1.21	5.58252	4.72114e-81
higher RPS in liver	3	37310820	ENSSSCG00000007920	EEF2KMT	11.235	2.55194	0.00500424	8.6825	10	0	1	9	3	0	0	3	Active	Active	6.29	10.72	-0.656908	0.0219034
higher RPS in liver	3	37460502	ENSSSCG00000007927	PPL	15.6155	11.2662	0.000557124	4.3475	13	0	5	8	10	0	0	10	Active	Active	8.21	7.34	0.31046	0.507033
higher RPS in liver	3	37555185	ENSSSCG00000007924	UBN1	10.9702	4.68815	5.30162e-05	6.28	9	0	3	6	4	0	0	4	Active	Active	16.98	16.89	0.0181988	0.917652
higher RPS in liver	3	37555394	ENSSSCG00000007931	GLYR1	10.9702	4.68815	5.30162e-05	6.28	9	0	3	6	4	0	0	4	Active	Active	70.87	41.75	0.809629	1.02018e-05
higher RPS in liver	3	37665474	ENSSSCG00000007935	C16orf71	28.4751	8.37108	2.73741e-11	20.1062	21	6	3	12	6	0	0	6	Active	Active	4.68	2.65	0.721398	0.0898979
higher RPS in liver	3	37868128	ENSSSCG00000007942	HMOX2	5.89182	0.828627	1.25522e-05	5.06	5	0	2	3	1	0	0	1	Active	Active	111.11	86.14	0.340004	0.258511
higher RPS in liver	3	38048128	ENSSSCG00000040215	TFAP4	18.9846	15.112	0.000115728	3.875	13	0	0	13	11	0	0	11	Active	Active	4.94	6.69	-0.311631	0.373456
higher RPS in liver	3	39780940	ENSSSCG00000008045	BRICD5	5.25993	1.22713	1.35116e-07	4.03125	4	0	0	4	1	0	0	1	Active	Active	0.04	0.45	-	-
higher RPS in liver	3	41337071	ENSSSCG00000023204	AXIN1	4.14585	0.732508	9.10075e-05	3.41125	4	0	1	3	1	0	0	1	Active	Active	9.88	19.22	-0.982441	0.000317458
higher RPS in liver	3	41538652	ENSSSCG00000007977	HBM	4.32966	0.529619	0.000486932	3.79625	5	0	2	3	1	0	0	1	Active	Active	222.35	22.14	3.47611	2.31936e-14
higher RPS in liver	3	41571634	ENSSSCG00000007962	SNRNP25	6.50385	0	0.00065893	6.5	7	0	0	7	0	0	0	0	Active	Active	275.03	62.11	1.99822	6.83737e-23
higher RPS in liver	3	41582098	ENSSSCG00000007973	IL9R	5.41198	0	0.000295082	5.4075	5	0	0	5	0	0	0	0	Active	Active	0.46	0.54	-0.293804	0.627694
higher RPS in liver	3	43504685	ENSSSCG00000032834	ZNF169	20.7794	17.1025	5.19163e-07	3.6725	15	0	0	15	12	0	0	12	Active	Active	39.31	23.61	0.877084	2.99659e-09
higher RPS in liver	3	43789121	ENSSSCG00000008092	NT5DC4	22.3637	8.76597	8.13659e-09	13.5962	15	7	1	7	6	0	4	2	Inactive	Inactive	0.64	0.19	2.25974	0.0998565
higher RPS in liver	3	43860550	ENSSSCG00000032288	SLC20A1	6.82201	1.26565	6.50513e-08	5.55625	5	0	1	4	1	0	0	1	Active	Active	82.41	30.52	1.55281	8.21797e-10
higher RPS in liver	3	44327731	ENSSSCG00000026954	TMEM87B	25.2475	4.22131	2.17692e-13	21.0275	17	0	0	17	3	0	0	3	Active	Active	23.24	20.91	0.204748	0.33936
higher RPS in liver	3	44483402	ENSSSCG00000008103	MERTK	24.4139	0	5.96731e-11	24.4112	17	0	9	8	0	0	0	0	Active	Active	10.38	3.8	1.60614	1.31791e-12
higher RPS in liver	3	44509692	ENSSSCG00000008105	ANAPC1	14.5207	4.00434	3.61017e-08	10.5188	11	0	7	4	3	0	0	3	Active	Active	20.31	25.87	-0.135554	0.349458
higher RPS in liver	3	44562222	ENSSSCG00000006050	Unknown	5.21466	0	9.74678e-09	5.20875	4	0	3	1	0	0	0	0	Inactive	Inactive	0.12	0.36	-	-
higher RPS in liver	3	45201724	ENSSSCG00000022322	BCL2L11	49.24	35.285	4.12591e-08	13.955	35	0	17	18	24	2	11	11	Active	Active	5.15	8.99	-0.596061	0.0261933
higher RPS in liver	3	45758268	ENSSSCG00000008122	ADRA2B	19.5468	12.3239	2.66603e-06	7.22	14	0	2	12	8	0	0	8	Inactive	Inactive	4.16	5.48	-0.351875	0.136697
higher RPS in liver	3	46129378	ENSSSCG00000047493	L1TD1	7.34784	3.68311	3.71033e-07	3.665	5	0	0	5	3	0	0	3	Inactive	Inactive	5.32	1.55	2.00614	1.26866e-07
higher RPS in liver	3	46137509	ENSSSCG00000008113	MRPS5	8.49959	0.93963	1.24269e-08	7.56	6	0	0	6	1	0	1	0	Active	Active	87.93	93.7	-0.079178	0.481886
higher RPS in liver	3	46377273	ENSSSCG00000008111	NPHP1	3.35571	0	1.69991e-06	3.35125	3	0	0	3	0	0	0	0	Active	Active	5.45	14.73	-1.33313	0.00508534
higher RPS in liver	3	46428884	ENSSSCG00000034826	Unknown	11.9447	5.69006	9.92385e-08	6.255	9	0	0	9	4	0	2	2	Inactive	Inactive	0.07	0	-	-
higher RPS in liver	3	46742971	ENSSSCG00000008124	NEURL3	12.5487	6.74207	1.03053e-08	5.8075	8	0	4	4	4	0	2	2	Inactive	Active	0.39	0.27	-	-
higher RPS in liver	3	47601379	ENSSSCG00000008136	RANBP2	4.29661	0	7.78911e-09	4.29125	3	0	0	3	0	0	0	0	Active	Active	99.52	85.87	0.427436	0.0108653
higher RPS in liver	3	47864497	ENSSSCG00000028691	SULT1C3	3.17728	0	1.2895e-05	3.17125	3	0	1	2	0	0	0	0	Inactive	Inactive	61.56	10.86	2.24923	1.84804e-08
higher RPS in liver	3	52288515	ENSSSCG00000008162	IL1R1	11.0513	1.1345	1.42639e-08	9.91625	8	0	3	5	1	0	0	1	Active	Inactive	318.64	24.01	3.93858	9.14342e-41
higher RPS in liver	3	53081268	ENSSSCG00000008167	CNOT11	12.7107	8.55808	2.17599e-06	4.1525	9	0	7	2	6	0	0	6	Active	Active	27.79	42.48	-0.562884	0.000109785
higher RPS in liver	3	55108355	ENSSSCG00000008183	MRPL30	6.88863	3.80247	2.38573e-06	3.08875	5	0	0	5	3	0	0	3	Active	Active	103.22	123.89	-0.158311	0.385268
higher RPS in liver	3	55560154	ENSSSCG00000008188	MGAT4A	17.5364	12.7994	2.23213e-08	4.73625	12	0	2	10	9	0	0	9	Active	Active	188.25	65.56	1.59025	1.17921e-16
higher RPS in liver	3	55676978	ENSSSCG00000025010	UNC50	34.1261	15.4533	3.12579e-09	18.675	24	0	12	12	11	0	0	11	Active	Active	184.78	61.67	1.5866	2.09397e-16
higher RPS in liver	3	55922979	ENSSSCG00000027113	CNGA3	5.72547	1.28195	7.90922e-06	4.445	5	0	0	5	1	0	1	0	Inactive	Active	0.07	0.12	-	-
higher RPS in liver	3	56277143	ENSSSCG00000008192	TMEM131	10.5806	6.19974	0.000371669	4.38	9	0	6	3	5	0	4	1	Active	Active	24.76	47.01	-0.74719	0.0199195
higher RPS in liver	3	56811790	ENSSSCG00000008201	CNNM3	17.3189	6.89777	1.30632e-06	10.4225	13	0	0	13	5	0	1	4	Active	Active	15.45	20.34	-0.418869	0.0136374
higher RPS in liver	3	56858453	ENSSSCG00000008202	CNNM4	14.225	4.27335	1.02635e-09	9.9525	11	0	0	11	3	0	1	2	Active	Active	10.95	7.65	0.595098	0.0086707
higher RPS in liver	3	56959110	ENSSSCG00000040434	KANSL3	6.7787	1.27836	1.92011e-09	5.50125	5	0	0	5	1	0	0	1	Active	Active	14.88	36	-1.25171	9.13187e-14
higher RPS in liver	3	57172946	ENSSSCG00000040009	IGKV2D-30	14.8516	7.12146	0.00171087	7.72875	16	0	0	16	8	0	0	8	Inactive	Inactive	0.06	0.07	-	-
higher RPS in liver	3	57386946	ENSSSCG00000008207	RPIA	5.24881	1.58573	8.67983e-06	3.6625	4	0	1	3	2	0	0	2	Active	Active	37.82	69.38	-0.799832	0.000250824
higher RPS in liver	3	57823440	ENSSSCG00000025106	THNSL2	6.97452	2.8115	3.99011e-09	4.165	5	0	1	4	2	0	0	2	Active	Active	45.79	54.09	-0.31	0.176012
higher RPS in liver	3	57850499	ENSSSCG00000008214	FABP1	4.69595	0	4.44401e-10	4.69	3	0	0	3	0	0	0	0	Active	Inactive	2620.58	1.86	10.5204	0
higher RPS in liver	3	57928260	ENSSSCG00000023294	KRCC1	15.7864	6.31518	7.15188e-09	9.47125	11	0	4	7	4	0	1	3	Active	Active	80.48	18.59	2.24554	7.93044e-13
higher RPS in liver	3	57960473	ENSSSCG00000047326	Unknown	10.2576	3.33736	6.07931e-08	6.92125	7	0	5	2	3	0	2	1	Inactive	Inactive	1.11	1.48	-0.185921	0.592193
higher RPS in liver	3	59225261	ENSSSCG00000022300	MAT2A	14.2144	9.38653	5.34726e-09	4.82875	9	0	0	9	6	0	0	6	Active	Active	129.43	240.25	-0.730012	0.0320432
higher RPS in liver	3	59327062	ENSSSCG00000008240	SH2D6	20.2212	17.0221	1.29423e-05	3.19875	13	0	9	4	11	0	3	8	Inactive	Active	1.1	1.96	-0.691553	0.0770867
higher RPS in liver	3	59335465	ENSSSCG00000008239	CAPG	24.7832	18.3157	6.19629e-07	6.46625	16	0	10	6	11	0	2	9	Active	Inactive	53.06	23.14	1.12049	0.000119356
higher RPS in liver	3	60114221	ENSSSCG00000045529	DNAH6	6.83599	1.37945	1.69045e-10	5.45625	5	0	2	3	1	0	0	1	Active	Active	0.13	0.11	-	-
higher RPS in liver	3	68572415	ENSSSCG00000049947	Unknown	4.71503	1.26417	7.6716e-06	3.4525	4	0	2	2	1	0	0	1	Active	Active	4	29.08	-3.67791	0.000174894
higher RPS in liver	3	69188182	ENSSSCG00000008300	STAMBP	25.5418	16.0689	5.71131e-07	9.47375	19	0	6	13	12	0	2	10	Active	Active	25.72	40.27	-0.584732	0.000857483
higher RPS in liver	3	70572197	ENSSSCG00000008311	CYP26B1	18.7198	15.0766	1.78668e-06	3.645	13	0	0	13	10	0	6	4	Active	Active	0.86	3.97	-2.42971	8.85495e-10
higher RPS in liver	3	71709681	ENSSSCG00000008321	FIGLA	5.14858	0	2.80831e-08	5.14375	4	0	0	4	0	0	0	0	Active	Active	0.14	0	-	-
higher RPS in liver	3	71948137	ENSSSCG00000008326	TGFA	17.0452	0	1.30558e-08	17.04	15	0	6	9	0	0	0	0	Active	Active	7.91	1.13	2.81847	6.40529e-16
higher RPS in liver	3	72190972	ENSSSCG00000026446	FAM136A	16.1722	8.38986	2.21194e-09	7.7825	11	0	0	11	6	0	1	5	Active	Active	132.16	79.26	0.767504	0.000313919
higher RPS in liver	3	72198756	ENSSSCG00000024776	SNRPG	12.1499	0	1.45065e-07	12.1475	10	0	0	10	0	0	0	0	Active	Active	432.8	165.28	1.36433	9.13854e-06
higher RPS in liver	3	72380362	ENSSSCG00000027224	PCBP1	18.9248	12.1676	1.79415e-07	6.75875	13	0	1	12	8	0	3	5	Active	Active	84.84	157.68	-0.774285	0.0182176
higher RPS in liver	3	72381330	ENSSSCG00000033099	ASPRV1	18.9248	12.1676	1.79415e-07	6.75875	13	0	1	12	8	0	3	5	Active	Active	3.52	3.86	-0.0698489	0.811658
higher RPS in liver	3	72565954	ENSSSCG00000025674	Unknown	20.9429	7.99267	2.9244e-09	12.9512	16	0	0	16	6	0	0	6	Active	Active	52.1	77.1	-0.48737	0.0244556
higher RPS in liver	3	72619691	ENSSSCG00000008335	GMCL2	10.0953	6.07964	1.46131e-07	4.01875	7	0	0	7	4	0	4	0	Active	Active	53.27	10.84	2.34346	5.70001e-28
higher RPS in liver	3	73466798	ENSSSCG00000037028	GKN3	22.6048	2.65619	2.04688e-09	19.945	16	0	7	9	2	0	1	1	Inactive	Inactive	0.02	0	-	-
higher RPS in liver	3	73650078	ENSSSCG00000008344	ARHGAP25	9.7046	0	2.02263e-09	9.69875	7	0	3	4	0	0	0	0	Inactive	Inactive	14.9	9.58	0.736887	0.00107763
higher RPS in liver	3	75625040	ENSSSCG00000039161	MEIS1	25.8196	8.01163	2.35998e-13	17.8075	17	0	4	13	6	0	1	5	Active	Active	58.15	24.27	1.37359	1.74101e-08
higher RPS in liver	3	77422238	ENSSSCG00000008363	AFTPH	14.0541	9.2866	1.17802e-06	4.76625	10	0	0	10	6	2	0	4	Active	Active	79.54	52.39	0.697245	0.000367206
higher RPS in liver	3	77658664	ENSSSCG00000028947	PELI1	3.57149	0	1.53229e-07	3.56375	3	0	3	0	0	0	0	0	Active	Active	29.05	29.28	0.0986304	0.68516
higher RPS in liver	3	79257760	ENSSSCG00000008372	EHBP1	26.5624	9.60905	7.53366e-09	16.9525	22	3	12	7	7	0	0	7	Active	Active	56.58	39.37	0.594244	0.0180807
higher RPS in liver	3	79415717	ENSSSCG00000026713	TMEM17	7.82241	1.4079	6.25708e-08	6.41375	6	0	4	2	1	0	0	1	Active	Active	17.81	11.46	0.751801	0.00619452
higher RPS in liver	3	79489280	ENSSSCG00000028518	Unknown	12.4715	0	3.36392e-13	12.4663	10	0	2	8	0	0	0	0	Inactive	Inactive	0.43	0.04	-	-
higher RPS in liver	3	79913975	ENSSSCG00000008376	COMMD1	5.49087	1.31847	1.07493e-09	4.17125	4	0	4	0	1	0	0	1	Active	Active	210.29	241.45	-0.143835	0.270042
higher RPS in liver	3	80795093	ENSSSCG00000008385	PUS10	14.0349	3.54	8.76904e-07	10.4938	11	0	1	10	3	0	0	3	Inactive	Inactive	30.29	24.07	0.414129	0.0015317
higher RPS in liver	3	86180047	ENSSSCG00000032007	RTN4	16.7167	10.6685	4.24225e-08	6.0475	11	0	1	10	7	0	0	7	Active	Active	1564.39	2600.98	-0.760061	0.0411575
higher RPS in liver	3	88584929	ENSSSCG00000042900	Unknown	5.82267	0	0.00017428	5.8175	9	0	3	6	0	0	0	0	Inactive	Inactive	0.18	0.89	-1.82759	0.0109445
higher RPS in liver	3	88580475	ENSSSCG00000044149	Unknown	5.82267	0	0.00017428	5.8175	9	0	3	6	0	0	0	0	Inactive	Inactive	0.26	1.23	-2.31889	2.45613e-05
higher RPS in liver	3	92742248	ENSSSCG00000008425	Unknown	16.6862	13.4521	6.77841e-06	3.23625	12	0	0	12	9	0	3	6	Inactive	Inactive	1.24	1.12	1.10277	0.413991
higher RPS in liver	3	94254079	ENSSSCG00000008443	EPAS1	31.4827	27.4876	0.00920033	3.9975	24	16	1	7	20	17	0	3	Active	Active	54.67	78.28	-0.454647	0.0955751
higher RPS in liver	3	96215454	ENSSSCG00000008449	SLC3A1	5.33661	0	5.79169e-10	5.33125	4	0	1	3	0	0	0	0	Inactive	Inactive	4.37	8.29	-0.712823	0.0830241
higher RPS in liver	3	96616229	ENSSSCG00000008453	ABCG8	4.92149	0	3.03998e-09	4.91625	3	3	0	0	0	0	0	0	Active	Active	71.41	0.87	6.41476	2.5496e-97
higher RPS in liver	3	96616246	ENSSSCG00000035912	ABCG5	4.92149	0	3.03998e-09	4.91625	3	3	0	0	0	0	0	0	Active	Active	149.73	0	15.8411	1.51217e-49
higher RPS in liver	3	98155831	ENSSSCG00000008467	EML4	5.08986	0	1.47849e-11	5.08375	4	0	4	0	0	0	0	0	Active	Active	79.2	31.67	1.44265	7.04836e-20
higher RPS in liver	3	98052399	ENSSSCG00000049471	Unknown	6.4738	2.52677	2.25822e-08	3.94625	5	0	2	3	2	0	0	2	Inactive	Inactive	1.86	1.74	0.279496	0.463102
higher RPS in liver	3	99775183	ENSSSCG00000048793	Unknown	3.81418	0	2.51844e-05	3.81	4	0	0	4	0	0	0	0	Inactive	Inactive	0.6	1.14	-0.824418	0.0531296
higher RPS in liver	3	101089243	ENSSSCG00000008478	SOS1	7.0422	0	1.20193e-07	7.03625	6	0	1	5	0	0	0	0	Active	Active	33.48	45.47	-0.287296	0.127398
higher RPS in liver	3	106724934	ENSSSCG00000008510	LTBP1	11.6177	2.8183	1.73957e-09	8.80125	9	0	5	4	2	0	2	0	Active	Active	70.07	131.59	-0.837287	0.0083141
higher RPS in liver	3	107986528	ENSSSCG00000008522	XDH	9.76077	0	5.431e-10	9.75625	6	5	0	1	0	0	0	0	Active	Inactive	105.5	0.19	9.19274	1.65623e-98
higher RPS in liver	3	109411252	ENSSSCG00000008533	ALK	10.7949	0	1.14463e-13	10.79	7	0	0	7	0	0	0	0	Active	Active	0.07	0.13	-	-
higher RPS in liver	3	111852745	ENSSSCG00000039557	TRIM54	13.0482	8.3322	3.14754e-06	4.715	9	0	1	8	6	0	0	6	Inactive	Active	0.02	77.09	-12.1789	2.37356e-56
higher RPS in liver	3	111870681	ENSSSCG00000021534	SLC30A3	7.96686	3.15511	3.65668e-06	4.81125	7	0	1	6	3	0	0	3	Active	Active	0.09	0.44	-	-
higher RPS in liver	3	112407075	ENSSSCG00000008564	CIB4	3.72939	0	3.50606e-07	3.72375	3	0	2	1	0	0	0	0	Inactive	Inactive	0.16	0.21	-	-
higher RPS in liver	3	113229175	ENSSSCG00000008576	Unknown	11.8725	0	1.26506e-09	11.8688	8	0	3	5	0	0	0	0	Active	Active	34.25	21.41	0.622133	0.00688552
higher RPS in liver	3	113816772	ENSSSCG00000008577	DNAJC27	22.7081	19.656	6.59784e-07	3.05125	15	0	5	10	13	0	7	6	Active	Active	2.4	8.09	-1.69582	1.7806e-19
higher RPS in liver	3	114604666	ENSSSCG00000008582	FAM228A	22.3218	8.6455	2.5724e-10	13.6775	16	0	4	12	6	0	0	6	Active	Active	6.28	0.51	3.14968	5.46514e-12
higher RPS in liver	3	114577956	ENSSSCG00000008584	AC008073.3	13.2066	7.02921	9.53694e-08	6.17625	10	0	4	6	5	0	0	5	Active	Active	23.89	4.13	2.58425	6.20399e-19
higher RPS in liver	3	114578187	ENSSSCG00000008585	PFN4	13.2066	7.02921	9.53694e-08	6.17625	10	0	4	6	5	0	0	5	Active	Active	1.49	2.23	-0.246596	0.683438
higher RPS in liver	3	114600043	ENSSSCG00000008586	TP53I3	22.3218	8.6455	2.5724e-10	13.6775	16	0	4	12	6	0	0	6	Active	Active	3.12	3.55	-0.0711175	0.911575
higher RPS in liver	3	114605970	ENSSSCG00000008587	SF3B6	10.9242	6.69725	8.22911e-07	4.22625	8	0	4	4	5	0	0	5	Active	Active	96.8	41.52	1.34826	6.82397e-11
higher RPS in liver	3	114634628	ENSSSCG00000045531	FKBP1B	5.31429	1.28066	2.5191e-06	4.03375	4	0	2	2	1	0	0	1	Active	Active	319.92	9.31	5.11828	1.25068e-86
higher RPS in liver	3	115967050	ENSSSCG00000049418	Unknown	33.3724	18.1992	0.00225848	15.1713	62	0	1	61	38	0	0	38	Inactive	Inactive	0.32	0.54	-1.39143	0.0402867
higher RPS in liver	3	115969069	ENSSSCG00000046275	Unknown	33.3724	18.1992	0.00225848	15.1713	62	0	1	61	38	0	0	38	Inactive	Active	1.22	2.12	-0.60416	0.388738
higher RPS in liver	3	117592466	ENSSSCG00000028931	GDF7	23.0093	13.5154	1.18822e-06	9.49375	18	0	2	16	10	0	0	10	Active	Active	0.05	0.1	-	-
higher RPS in liver	3	117987557	ENSSSCG00000008601	SDC1	11.282	6.95458	1.71811e-07	4.32625	8	0	3	5	5	0	3	2	Active	Active	87.29	3.87	4.47274	3.14001e-34
higher RPS in liver	3	118152586	ENSSSCG00000008602	LAPTM4A	3.66246	0	6.40497e-07	3.6575	3	0	2	1	0	0	0	0	Active	Active	450.74	221.36	1.01669	7.58679e-05
higher RPS in liver	3	120097069	ENSSSCG00000008613	GEN1	3.92093	0	3.59057e-08	3.91375	3	3	0	0	0	0	0	0	Active	Active	24.61	2.41	3.32564	6.06094e-10
higher RPS in liver	3	120097379	ENSSSCG00000008614	SMC6	3.92093	0	3.59057e-08	3.91375	3	3	0	0	0	0	0	0	Active	Active	110.11	45.82	1.39679	8.70734e-12
higher RPS in liver	3	121549491	ENSSSCG00000008618	MYCN	14.5881	6.96937	1.71163e-09	7.62	11	0	2	9	5	0	0	5	Active	Active	4.67	1.15	1.47032	1.29178e-06
higher RPS in liver	3	121542964	ENSSSCG00000033084	Unknown	7.52896	2.5337	2.07954e-08	4.995	6	0	1	5	2	0	0	2	Inactive	Inactive	0	0	-	-
higher RPS in liver	3	126905659	ENSSSCG00000020799	CPSF3	4.0177	0	5.36244e-09	4.01125	3	0	2	1	0	0	0	0	Active	Active	91.96	76.99	0.386463	0.00189785
higher RPS in liver	3	126905809	ENSSSCG00000029313	ITGB1BP1	4.0177	0	5.36244e-09	4.01125	3	0	2	1	0	0	0	0	Active	Active	28.38	32.98	-0.214481	0.114515
higher RPS in liver	3	127082933	ENSSSCG00000008642	ASAP2	31.1717	24.1118	1.19462e-06	7.06125	22	0	5	17	18	0	3	15	Active	Active	8.26	8.59	0.038983	0.84453
higher RPS in liver	3	127503257	ENSSSCG00000008645	ID2	48.2164	4.23169	4.13562e-12	43.985	36	22	3	11	3	0	0	3	Active	Active	94.66	7.49	3.50513	1.01451e-54
higher RPS in liver	3	128805483	ENSSSCG00000008646	RNF144A	11.7464	1.29513	2.04359e-10	10.4537	8	0	2	6	1	0	0	1	Active	Inactive	30.93	17.61	0.737919	1.38995e-07
higher RPS in liver	3	128897847	ENSSSCG00000008648	RSAD2	8.60256	4.95636	0.000286411	3.6475	7	0	6	1	4	4	0	0	Active	Active	29.03	52.04	-0.535612	0.708242
higher RPS in liver	3	128903616	ENSSSCG00000008647	CMPK2	3.7142	0	4.43027e-07	3.71	3	0	3	0	0	0	0	0	Active	Active	23.81	20.14	0.310626	0.615193
higher RPS in liver	4	1378660	ENSSSCG00000039313	Unknown	7.11883	0.734083	8.45705e-07	6.3825	5	0	0	5	1	0	0	1	Inactive	Inactive	0.13	0	-	-
higher RPS in liver	4	1444114	ENSSSCG00000037524	LY6D	22.1501	14.3857	5.6969e-06	7.7675	15	0	1	14	11	0	2	9	Inactive	Active	0.18	0	-	-
higher RPS in liver	4	1450147	ENSSSCG00000031724	LYNX1	16.446	12.111	0.000178082	4.33375	12	0	1	11	9	0	1	8	Active	Active	1.95	14.83	-2.7532	7.69732e-14
higher RPS in liver	4	4373944	ENSSSCG00000005939	FAM135B	5.58002	0	1.7753e-08	5.57375	4	0	0	4	0	0	0	0	Inactive	Inactive	0.77	0	8.61559	5.85159e-16
higher RPS in liver	4	7814694	ENSSSCG00000005943	ST3GAL1	13.0411	9.88629	1.56343e-05	3.15625	10	2	3	5	7	0	0	7	Active	Active	81.12	54.55	0.566266	0.0472915
higher RPS in liver	4	8670176	ENSSSCG00000005953	KCNQ3	19.4661	11.2245	6.85899e-07	8.24125	13	0	0	13	8	0	1	7	Active	Active	3.08	0.87	2.04061	4.56119e-05
higher RPS in liver	4	10717969	ENSSSCG00000005961	Unknown	33.4433	29.025	0.0320167	4.41875	39	0	4	35	34	1	4	29	Inactive	Inactive	0.12	0.04	-	-
higher RPS in liver	4	12622766	ENSSSCG00000042693	Unknown	5.22505	0	9.79505e-06	5.22	4	0	0	4	0	0	0	0	Inactive	Inactive	0.04	0	-	-
higher RPS in liver	4	14825670	ENSSSCG00000005971	ZNF572	11.2305	6.32829	9.88186e-05	4.9025	10	0	3	7	6	0	0	6	Active	Active	14.46	12.39	0.22085	0.220522
higher RPS in liver	4	20645809	ENSSSCG00000006009	EXT1	50.0403	8.53443	2.03393e-11	41.505	34	9	6	19	6	5	0	1	Active	Active	95.67	45.65	1.20787	9.53607e-08
higher RPS in liver	4	36635285	ENSSSCG00000006066	RNF19A	8.95559	2.56185	5.86867e-06	6.3925	7	1	0	6	2	2	0	0	Inactive	Inactive	58.93	44.18	0.492091	0.0850903
higher RPS in liver	4	36852610	ENSSSCG00000021180	Unknown	23.81	18.7219	4.66438e-06	5.0875	17	0	4	13	13	0	0	13	Active	Active	22.93	16.36	0.614332	0.00195247
higher RPS in liver	4	36856937	ENSSSCG00000006069	RGS22	23.0937	18.3801	3.78128e-06	4.71375	16	0	3	13	12	1	0	11	Inactive	Active	0.74	2.03	-1.30636	0.000768318
higher RPS in liver	4	38023436	ENSSSCG00000041004	Unknown	3.53587	0	8.29869e-08	3.53125	3	0	2	1	0	0	0	0	Inactive	Inactive	0.19	0.18	-	-
higher RPS in liver	4	38656151	ENSSSCG00000006078	POP1	6.29596	0	7.11098e-09	6.28875	4	0	0	4	0	0	0	0	Active	Active	10.27	8.87	0.389258	0.260918
higher RPS in liver	4	38656319	ENSSSCG00000006079	RIDA	6.29596	0	7.11098e-09	6.28875	4	0	0	4	0	0	0	0	Active	Active	598.19	10.42	5.81319	9.59939e-94
higher RPS in liver	4	38702022	ENSSSCG00000050707	Unknown	12.1151	0	6.27452e-10	12.11	9	0	0	9	0	0	0	0	Active	Active	266.08	0	9.26948	3.91296e-17
higher RPS in liver	4	38701720	ENSSSCG00000006081	RPL30	12.1151	0	6.27452e-10	12.11	9	0	0	9	0	0	0	0	Active	Active	1729.48	1102.04	0.693487	0.000157129
higher RPS in liver	4	40129697	ENSSSCG00000006088	SDC2	6.16218	1.32685	5.91844e-09	4.83625	5	3	0	2	1	0	1	0	Active	Active	659.74	78.61	3.16045	3.22605e-31
higher RPS in liver	4	40473013	ENSSSCG00000034943	GDF6	4.44342	0	5.55782e-10	4.43625	3	0	1	2	0	0	0	0	Active	Active	0.62	0.08	4.00365	0.000190971
higher RPS in liver	4	41397633	ENSSSCG00000045339	Unknown	17.6479	9.70235	3.19053e-07	7.94625	13	1	1	11	7	0	1	6	Inactive	Inactive	0.45	0.69	-0.271926	0.609153
higher RPS in liver	4	41535390	ENSSSCG00000039549	PLEKHF2	6.21503	1.3076	9.20249e-08	4.90375	5	0	4	1	1	0	0	1	Active	Active	65.37	27.5	1.32374	2.98387e-05
higher RPS in liver	4	41655662	ENSSSCG00000006093	NDUFAF6	25.0744	19.6483	3.19886e-05	5.42875	16	4	5	7	14	0	1	13	Active	Active	36.36	51.15	-0.524125	0.0480554
higher RPS in liver	4	41747726	ENSSSCG00000034321	TP53INP1	11.1136	5.44632	4.03528e-08	5.6675	7	5	0	2	4	0	2	2	Active	Active	168.13	32.32	2.18955	7.01688e-16
higher RPS in liver	4	43239144	ENSSSCG00000047343	Unknown	4.81817	0	0.0411364	4.815	10	0	0	10	0	0	0	0	Inactive	Inactive	0.28	0.01	-	-
higher RPS in liver	4	50509113	ENSSSCG00000006137	WWP1	16.3956	5.73312	6.48132e-09	10.6625	13	0	0	13	4	0	0	4	Active	Active	111.21	92.4	0.297028	0.14084
higher RPS in liver	4	50475274	ENSSSCG00000046388	Unknown	5.95382	0	1.94762e-07	5.95	5	0	0	5	0	0	0	0	Inactive	Inactive	0.15	0	-	-
higher RPS in liver	4	51211259	ENSSSCG00000006140	CA2	19.8059	15.9042	8.29629e-07	3.9025	13	0	5	8	10	0	2	8	Active	Active	184.58	6.97	4.73675	3.21884e-31
higher RPS in liver	4	51237846	ENSSSCG00000006141	CA3	15.5317	7.99869	1.19127e-08	7.53125	11	0	5	6	6	0	3	3	Active	Active	367.26	1205.16	-1.56184	0.0058535
higher RPS in liver	4	51579772	ENSSSCG00000046671	Unknown	7.90154	2.35786	2.32814e-09	5.54125	6	0	0	6	2	0	0	2	Inactive	Inactive	0.41	0.5	-	-
higher RPS in liver	4	53296504	ENSSSCG00000049545	Unknown	33.2564	24.6014	0.0245851	8.6575	59	0	0	59	45	0	0	45	Inactive	Inactive	0.08	0.17	-	-
higher RPS in liver	4	56607714	ENSSSCG00000037782	MRPS28	12.3917	8.8515	2.25042e-07	3.54	9	0	0	9	6	0	2	4	Active	Active	261.08	177.95	0.62939	9.76659e-05
higher RPS in liver	4	60637090	ENSSSCG00000034242	HNF4G	11.3824	0	8.52693e-10	11.3788	8	4	0	4	0	0	0	0	Active	Active	25.34	0.17	7.29169	1.02119e-37
higher RPS in liver	4	61971426	ENSSSCG00000006176	ELOC	3.38548	0	5.56543e-07	3.38	3	0	2	1	0	0	0	0	Active	Active	65.2	67.81	0.0894427	0.638577
higher RPS in liver	4	64710771	ENSSSCG00000006192	LACTB2	13.6672	2.76022	1.43664e-08	10.9087	10	0	5	5	2	0	0	2	Active	Active	556.44	80.85	2.73776	3.33689e-14
higher RPS in liver	4	64954120	ENSSSCG00000006194	NCOA2	11.1494	6.68699	1.4275e-06	4.4625	9	0	6	3	5	0	3	2	Active	Active	46.76	25.66	0.960894	5.08143e-07
higher RPS in liver	4	68285406	ENSSSCG00000006213	ADHFE1	20.1532	12.2325	2.38909e-07	7.92	15	0	0	15	9	0	2	7	Active	Active	26.51	7.98	1.36179	0.000584391
higher RPS in liver	4	68288195	ENSSSCG00000006214	RRS1	20.1532	12.2325	2.38909e-07	7.92	15	0	0	15	9	0	2	7	Active	Active	14.5	19.7	-0.0843397	0.802869
higher RPS in liver	4	70961465	ENSSSCG00000037637	GGH	4.15116	0	1.79351e-07	4.14625	3	0	0	3	0	0	0	0	Active	Active	750.5	31.55	4.58598	1.8079e-49
higher RPS in liver	4	72754432	ENSSSCG00000006231	Unknown	21.8426	13.0612	4.1105e-08	8.78125	17	0	5	12	10	2	3	5	Active	Active	10.13	15.23	-0.407611	0.176834
higher RPS in liver	4	75969157	ENSSSCG00000006251	TGS1	6.72489	0	4.29018e-09	6.72	5	0	2	3	0	0	0	0	Active	Active	13.39	17.86	-0.2542	0.127563
higher RPS in liver	4	75969203	ENSSSCG00000006252	TMEM68	6.72489	0	4.29018e-09	6.72	5	0	2	3	0	0	0	0	Active	Active	84.93	33.8	1.46557	1.80583e-16
higher RPS in liver	4	76857139	ENSSSCG00000006256	SOX17	3.67193	0	1.34398e-08	3.66875	3	0	0	3	0	0	0	0	Active	Active	2.17	3.75	-0.65192	0.0133613
higher RPS in liver	4	79264878	ENSSSCG00000039568	SNAI2	52.0427	41.5716	3.66068e-05	10.4725	40	0	14	26	30	0	0	30	Active	Active	10.49	22.24	-1.19987	0.000278442
higher RPS in liver	4	81306373	ENSSSCG00000006287	SELL	11.8029	0	6.4726e-10	11.7988	8	0	7	1	0	0	0	0	Inactive	Inactive	63.41	7.83	3.23297	1.55154e-09
higher RPS in liver	4	81403232	ENSSSCG00000006289	F5	6.20361	0	1.15858e-09	6.2	4	0	0	4	0	0	0	0	Active	Active	147.88	1.17	7.04224	1.14172e-55
higher RPS in liver	4	82287730	ENSSSCG00000035937	DPT	5.58962	0	3.22072e-10	5.585	4	0	0	4	0	0	0	0	Inactive	Active	22.36	100.34	-2.0169	1.3182e-06
higher RPS in liver	4	85029895	ENSSSCG00000006324	Unknown	12.1066	9.0627	1.62976e-07	3.04625	8	0	1	7	6	0	2	4	Active	Active	671.99	138.13	2.23775	8.6058e-16
higher RPS in liver	4	87390467	ENSSSCG00000006335	RGS4	9.82251	0	2.69819e-11	9.8175	7	0	5	2	0	0	0	0	Inactive	Active	14.98	9.6	0.452871	0.196752
higher RPS in liver	4	87742992	ENSSSCG00000006337	HSD17B7	7.02133	0	1.41851e-10	7.01875	5	0	5	0	0	0	0	0	Active	Active	273.7	32.22	3.18746	1.14999e-20
higher RPS in liver	4	88471994	ENSSSCG00000006344	NOS1AP	31.0186	4.26389	2.30127e-11	26.7538	22	5	9	8	3	0	1	2	Active	Active	8.8	2	2.11505	7.61272e-28
higher RPS in liver	4	88333556	ENSSSCG00000045357	Unknown	4.96175	0.404012	1.85715e-05	4.55625	4	0	2	2	1	0	0	1	Inactive	Inactive	0.04	0.1	-	-
higher RPS in liver	4	88818372	ENSSSCG00000006346	ATF6	15.3202	2.25202	7.91247e-07	13.0687	13	0	2	11	2	0	1	1	Active	Active	94.3	125.91	-0.305593	0.134158
higher RPS in liver	4	88826348	ENSSSCG00000006347	DUSP12	16.6352	0.913092	6.63256e-09	15.7212	12	0	4	8	1	0	0	1	Inactive	Inactive	18.59	13.68	0.541912	0.00394254
higher RPS in liver	4	89130093	ENSSSCG00000023957	CFAP126	19.0779	14.1363	1.2628e-07	4.94	12	0	3	9	9	0	2	7	Inactive	Inactive	2.5	6.02	-1.1319	0.00552074
higher RPS in liver	4	89169121	ENSSSCG00000030318	SDHC	5.17924	1.53222	2.8336e-07	3.64625	4	0	0	4	1	0	0	1	Active	Active	198.96	278.12	-0.573019	0.0783765
higher RPS in liver	4	89169311	ENSSSCG00000006352	MPZ	5.17924	1.53222	2.8336e-07	3.64625	4	0	0	4	1	0	0	1	Active	Active	0.84	132.63	-7.49314	1.97152e-111
higher RPS in liver	4	89213114	ENSSSCG00000031579	PCP4L1	8.21053	3.51214	5.33212e-06	4.6975	6	5	0	1	3	0	2	1	Active	Inactive	22.38	6.31	1.83939	9.69136e-09
higher RPS in liver	4	89226690	ENSSSCG00000006353	NR1I3	21.2224	13.1759	1.53139e-07	8.0475	13	8	0	5	10	0	4	6	Active	Inactive	72.39	0.18	8.676	2.35837e-97
higher RPS in liver	4	89235347	ENSSSCG00000006354	TOMM40L	22.4263	9.27285	3.60856e-13	13.1525	13	8	0	5	6	0	4	2	Active	Active	22.4	56.51	-1.26395	2.17479e-11
higher RPS in liver	4	89237511	ENSSSCG00000006355	APOA2	22.4263	9.27285	3.60856e-13	13.1525	13	8	0	5	6	0	4	2	Active	Active	5917.76	4.84	10.29	6.42392e-278
higher RPS in liver	4	89247065	ENSSSCG00000006357	FCER1G	23.2319	9.13132	4.98306e-09	14.1025	15	8	0	7	6	0	4	2	Active	Inactive	21.7	12.51	0.903331	0.00295236
higher RPS in liver	4	89261687	ENSSSCG00000006358	NDUFS2	17.2095	8.35947	3.42374e-08	8.85125	11	5	0	6	6	0	4	2	Active	Active	259.26	1161.67	-2.18266	1.71265e-44
higher RPS in liver	4	89260460	ENSSSCG00000006359	ADAMTS4	17.2095	8.35947	3.42374e-08	8.85125	11	5	0	6	6	0	4	2	Active	Active	1.83	6.04	-1.47572	0.000224572
higher RPS in liver	4	89278438	ENSSSCG00000006360	B4GALT3	9.27969	4.33147	1.83151e-05	4.9475	7	3	0	4	3	0	3	0	Active	Active	13.78	14.06	0.0201718	0.91923
higher RPS in liver	4	89401340	ENSSSCG00000006370	TSTD1	9.23801	0.864954	2.62789e-06	8.37125	8	0	0	8	1	0	0	1	Active	Active	79.66	2.55	5.02698	2.41093e-31
higher RPS in liver	4	90901875	ENSSSCG00000037268	APCS	4.31765	0	5.24712e-09	4.3125	3	0	0	3	0	0	0	0	Active	Inactive	440.93	0.87	9.3329	8.18679e-31
higher RPS in liver	4	91658851	ENSSSCG00000044661	OR10X1	17.7655	12.0833	0.00160717	5.68	22	0	1	21	14	0	0	14	Inactive	Inactive	0	0	-	-
higher RPS in liver	4	91852093	ENSSSCG00000047581	VPS4A	8.57212	0	1.103e-08	8.56625	7	0	0	7	0	0	0	0	Inactive	Inactive	0	0	-	-
higher RPS in liver	4	91863710	ENSSSCG00000025644	CD1A	8.45976	1.10067	1.18633e-09	7.3575	6	0	0	6	1	0	0	1	Inactive	Inactive	1.58	0.85	0.889157	0.0715088
higher RPS in liver	4	92791425	ENSSSCG00000049524	Unknown	21.0099	4.37802	2.46224e-09	16.6313	14	0	10	4	3	0	1	2	Active	Active	35.77	18.54	1.123	2.61621e-08
higher RPS in liver	4	92821271	ENSSSCG00000043115	Unknown	12.822	0	7.33704e-09	12.8175	10	0	6	4	0	0	0	0	Inactive	Inactive	29.89	1.46	4.43518	7.77306e-17
higher RPS in liver	4	95154358	ENSSSCG00000006543	ADAR	12.3842	8.84625	3.36122e-07	3.54	9	0	3	6	6	0	0	6	Active	Active	21.47	30.34	-0.457307	0.103427
higher RPS in liver	4	95220867	ENSSSCG00000006544	UBE2Q1	7.59057	0	6.33165e-11	7.585	5	0	2	3	0	0	0	0	Active	Active	68.11	87.16	-0.246393	0.0546951
higher RPS in liver	4	95699447	ENSSSCG00000031838	Unknown	20.0667	15.2129	7.19382e-09	4.8525	13	0	1	12	10	0	0	10	Active	Active	2498.05	1847.73	0.527408	0.0205335
higher RPS in liver	4	95713563	ENSSSCG00000006559	JTB	23.0607	19.2766	2.10974e-08	3.785	15	0	2	13	12	0	0	12	Active	Active	144.87	196.38	-0.444907	0.00131275
higher RPS in liver	4	96239285	ENSSSCG00000006588	S100A9	7.74604	1.30794	1.76529e-09	6.435	5	0	0	5	1	0	0	1	Inactive	Active	1385.96	4.9	8.3781	1.06969e-23
higher RPS in liver	4	96243118	ENSSSCG00000006587	PGLYRP4	5.90243	1.28712	5.99347e-08	4.615	4	0	0	4	1	0	0	1	Active	Active	0.23	0.24	-	-
higher RPS in liver	4	96243372	ENSSSCG00000027322	PGLYRP3	5.90243	1.28712	5.99347e-08	4.615	4	0	0	4	1	0	0	1	Active	Active	0.01	0.04	-	-
higher RPS in liver	4	96350803	ENSSSCG00000046524	PRR9	10.2398	0.842895	4.34569e-07	9.395	9	0	0	9	1	0	0	1	Inactive	Inactive	0	0.25	-	-
higher RPS in liver	4	96590696	ENSSSCG00000022269	SPRP	11.8397	1.39911	8.63317e-08	10.4388	9	0	0	9	2	0	0	2	Inactive	Inactive	0.22	0	-	-
higher RPS in liver	4	96676426	ENSSSCG00000006594	SMCP	11.1301	6.67886	7.35989e-05	4.45125	8	0	0	8	5	0	0	5	Inactive	Inactive	0.01	0	-	-
higher RPS in liver	4	96915047	ENSSSCG00000042968	Unknown	7.52632	3.94211	3.31822e-05	3.58375	6	0	0	6	3	0	0	3	Inactive	Inactive	0.24	0.62	-1.20143	0.00273393
higher RPS in liver	4	100436529	ENSSSCG00000006701	CHD1L	7.06641	3.39345	5.57136e-05	3.6725	6	0	0	6	3	0	2	1	Active	Active	19.59	19.06	0.126247	0.42629
higher RPS in liver	4	100479131	ENSSSCG00000006704	NBPF19	11.3359	3.97179	7.48257e-09	7.36625	9	0	0	9	3	0	2	1	Active	Active	4.5	1.85	1.43626	2.31796e-06
higher RPS in liver	4	100880914	ENSSSCG00000020964	SEC22B	16.9451	9.25662	8.53356e-06	7.6875	14	0	4	10	8	0	1	7	Active	Active	396.58	181.4	1.28064	4.59781e-06
higher RPS in liver	4	100951507	ENSSSCG00000006709	NOTCH2	23.0696	9.79056	1.25955e-06	13.2775	18	2	6	10	9	0	3	6	Inactive	Inactive	65.34	77.6	-0.214605	0.220432
higher RPS in liver	4	101255188	ENSSSCG00000045266	NBPF19	25.6071	18.0554	0.0256048	7.555	44	1	3	40	31	0	7	24	Active	Active	0.18	0	-	-
higher RPS in liver	4	101337282	ENSSSCG00000040947	REG4	7.36835	2.33052	4.41226e-06	5.03625	6	0	3	3	3	0	0	3	Inactive	Inactive	0.07	0.14	-	-
higher RPS in liver	4	101478144	ENSSSCG00000006717	PHGDH	9.4647	4.27256	7.37119e-05	5.1925	8	4	0	4	3	0	2	1	Active	Active	189.48	153.17	0.158777	0.708016
higher RPS in liver	4	103793138	ENSSSCG00000006735	PTGFRN	3.65216	0.363228	5.81827e-06	3.28375	3	0	2	1	1	0	0	1	Inactive	Inactive	20.59	44.69	-0.907628	0.000712897
higher RPS in liver	4	104384606	ENSSSCG00000006740	ATP1A1	20.0549	13.8287	5.85133e-05	6.22625	15	0	4	11	12	0	7	5	Active	Active	151.14	57.77	1.36513	6.77237e-08
higher RPS in liver	4	104625235	ENSSSCG00000006742	MAB21L3	3.90698	0	5.03395e-08	3.90125	3	0	0	3	0	0	0	0	Active	Inactive	19.89	0.22	6.47489	8.60221e-94
higher RPS in liver	4	105256417	ENSSSCG00000032417	NGF	7.61316	0	3.39146e-10	7.60625	6	0	0	6	0	0	0	0	Active	Active	3.5	1.85	1.09053	0.00929555
higher RPS in liver	4	106058191	ENSSSCG00000006757	TRIM33	4.40806	0	5.79901e-06	4.4025	4	0	4	0	0	0	0	0	Active	Active	33.72	30.95	0.209008	0.102594
higher RPS in liver	4	107345598	ENSSSCG00000006767	MAGI3	18.6891	8.79359	1.14063e-07	9.89375	14	0	2	12	6	0	0	6	Inactive	Inactive	18.33	16.59	0.235435	0.13794
higher RPS in liver	4	107719360	ENSSSCG00000042304	TAFA3	12.4513	8.6798	8.19702e-05	3.77	8	0	2	6	6	0	2	4	Active	Active	0.67	0.71	-0.101096	0.748485
higher RPS in liver	4	107723434	ENSSSCG00000006774	PPM1J	12.2914	7.27216	3.11781e-07	5.0175	8	0	2	6	5	0	2	3	Active	Active	7.64	31.53	-2.16616	7.75008e-08
higher RPS in liver	4	108650661	ENSSSCG00000036030	INKA2	5.06939	0	4.51744e-08	5.06375	4	0	2	2	0	0	0	0	Active	Active	4.43	18.63	-1.99165	6.47755e-09
higher RPS in liver	4	110132647	ENSSSCG00000006816	AHCYL1	26.7363	21.4124	2.09717e-05	5.3225	19	0	13	6	14	0	1	13	Active	Active	115.1	142.89	-0.274313	0.306691
higher RPS in liver	4	110311507	ENSSSCG00000006820	EPS8L3	16.15	13.0997	0.00447586	3.045	13	0	2	11	10	0	0	10	Inactive	Inactive	1.02	1.64	-0.435476	0.25257
higher RPS in liver	4	110486771	ENSSSCG00000037808	GSTM4	20.0124	13.1877	0.000728043	6.82375	16	1	5	10	10	0	0	10	Inactive	Inactive	321.83	41.07	2.41404	0.000161477
higher RPS in liver	4	110505138	ENSSSCG00000031125	AMPD2	9.93027	4.79485	7.21586e-10	5.135	6	5	0	1	3	0	2	1	Active	Active	40.46	15.74	1.29585	2.64624e-05
higher RPS in liver	4	111467293	ENSSSCG00000006850	FAM102B	4.07154	0	1.73572e-06	4.06625	4	0	0	4	0	0	0	0	Active	Active	25.38	19.83	0.497906	0.0859596
higher RPS in liver	4	111504725	ENSSSCG00000051127	Unknown	6.96341	0	1.24707e-09	6.95625	5	0	0	5	0	0	0	0	Inactive	Inactive	0	0	-	-
higher RPS in liver	4	115188012	ENSSSCG00000036331	AMY1C	6.80002	3.40027	0.00764305	3.4	6	0	0	6	4	0	2	2	Inactive	Active	0.62	33.05	-5.61822	4.29412e-30
higher RPS in liver	4	115226515	ENSSSCG00000028277	AMY1C	7.79054	3.81453	0.00964319	3.97875	9	0	0	9	5	0	0	5	Inactive	Active	0.56	23.31	-5.23736	2.41461e-08
higher RPS in liver	4	117069649	ENSSSCG00000029849	S1PR1	31.8531	22.828	8.49825e-07	9.02375	24	6	7	11	16	0	6	10	Active	Active	42.15	71.78	-0.937307	1.40705e-06
higher RPS in liver	4	117619884	ENSSSCG00000035602	GPR88	11.3887	7.47266	1.52461e-06	3.91375	9	0	0	9	6	0	4	2	Active	Active	0.13	0.21	-	-
higher RPS in liver	4	122203115	ENSSSCG00000036509	RWDD3	9.08282	2.74514	1.31746e-06	6.33875	7	0	3	4	2	0	0	2	Active	Active	78.61	27.54	1.56386	3.71717e-09
higher RPS in liver	4	122618582	ENSSSCG00000006888	SLC44A3	17.14	12.2841	2.4941e-07	4.85625	13	0	6	7	9	0	2	7	Inactive	Inactive	33.27	0.41	6.50835	4.84503e-82
higher RPS in liver	4	124773887	ENSSSCG00000006903	RPAP2	3.63048	0	0.000102382	3.625	4	0	1	3	0	0	0	0	Active	Active	43.31	54.44	-0.37627	0.134973
higher RPS in liver	4	124773979	ENSSSCG00000006904	GLMN	3.63048	0	0.000102382	3.625	4	0	1	3	0	0	0	0	Active	Active	20.54	21.86	-0.014429	0.945829
higher RPS in liver	4	125522317	ENSSSCG00000006912	HFM1	7.48466	4.43022	3.23328e-06	3.05625	5	0	0	5	3	0	1	2	Active	Active	5.92	7.5	-0.179578	0.465306
higher RPS in liver	4	126028810	ENSSSCG00000006914	BARHL2	3.36185	0	1.11053e-05	3.3575	3	0	0	3	0	0	0	0	Inactive	Active	0.05	0.09	-	-
higher RPS in liver	4	126717815	ENSSSCG00000038253	ZNF326	23.8943	17.3203	1.83324e-08	6.57625	16	0	9	7	11	0	5	6	Active	Active	32.16	20.62	0.89218	0.000438765
higher RPS in liver	4	126874275	ENSSSCG00000038417	LRRC8D	22.0054	14.4057	2.93341e-07	7.5975	15	0	9	6	10	0	9	1	Active	Active	52.89	27.7	0.965914	5.79178e-05
higher RPS in liver	4	130702424	ENSSSCG00000006947	SYDE2	4.87808	0	2.035e-08	4.875	3	3	0	0	0	0	0	0	Active	Active	36.46	17.69	1.08394	2.12884e-10
higher RPS in liver	7	1657419	ENSSSCG00000028777	MYLK4	9.53214	3.84424	8.98956e-05	5.69125	10	0	4	6	5	0	1	4	Active	Active	1.68	66.52	-5.30521	2.09647e-81
higher RPS in liver	7	1656442	ENSSSCG00000001010	WRNIP1	9.53214	3.84424	8.98956e-05	5.69125	10	0	4	6	5	0	1	4	Active	Active	40.74	60.18	-0.539759	0.0205981
higher RPS in liver	7	4750673	ENSSSCG00000038886	CAGE1	4.35596	0	1.72019e-06	4.35	4	0	0	4	0	0	0	0	Active	Active	2.95	4.47	-0.499641	0.0255697
higher RPS in liver	7	4750759	ENSSSCG00000001024	RIOK1	4.35596	0	1.72019e-06	4.35	4	0	0	4	0	0	0	0	Active	Active	11.36	15.56	-0.286573	0.136276
higher RPS in liver	7	5058817	ENSSSCG00000001027	BMP6	26.8357	21.9141	0.00104254	4.9225	20	1	8	11	17	0	7	10	Active	Active	4.39	4.3	0.0568025	0.889217
higher RPS in liver	7	5993980	ENSSSCG00000043581	Unknown	3.1214	0	5.9305e-08	3.11625	2	0	0	2	0	0	0	0	Inactive	Inactive	0.32	1.73	-2.20027	0.271983
higher RPS in liver	7	7328214	ENSSSCG00000033009	GCNT2	8.08737	0	9.76345e-10	8.08375	6	0	3	3	0	0	0	0	Active	Active	24.69	5.49	2.32638	2.10283e-19
higher RPS in liver	7	7437789	ENSSSCG00000001040	C6ORF52	17.181	1.28114	2.06825e-09	15.8963	13	0	5	8	1	0	0	1	Active	Inactive	48.67	0	10.1385	9.16467e-16
higher RPS in liver	7	7444789	ENSSSCG00000001041	PAK1IP1	13.3848	0	1.98979e-09	13.38	10	0	4	6	0	0	0	0	Active	Active	111.14	89.08	0.531616	0.0024175
higher RPS in liver	7	7774018	ENSSSCG00000001045	ELOVL2	15.2675	11.4684	5.16051e-07	3.79875	11	0	9	2	8	3	0	5	Active	Active	170.76	0.97	7.51464	6.57704e-146
higher RPS in liver	7	7774210	ENSSSCG00000032146	Unknown	15.2675	11.4684	5.16051e-07	3.79875	11	0	9	2	8	3	0	5	Active	Active	10.37	26.7	-1.26076	4.15543e-07
higher RPS in liver	7	7774542	ENSSSCG00000041131	SMIM13	15.2675	11.4684	5.16051e-07	3.79875	11	0	9	2	8	3	0	5	Active	Active	0.25	0	-	-
higher RPS in liver	7	8093553	ENSSSCG00000023956	NEDD9	20.6834	12.0278	1.75907e-08	8.65625	16	0	5	11	9	0	4	5	Active	Active	10.4	14.06	-0.317187	0.18845
higher RPS in liver	7	8093890	ENSSSCG00000037420	TMEM170B	20.6834	12.0278	1.75907e-08	8.65625	16	0	5	11	9	0	4	5	Active	Active	37.62	23.12	0.795976	4.39831e-05
higher RPS in liver	7	8314339	ENSSSCG00000001048	ADTRP	3.92142	0	1.44465e-09	3.9175	3	1	0	2	0	0	0	0	Active	Inactive	190.52	0.27	9.57951	2.1806e-109
higher RPS in liver	7	8313654	ENSSSCG00000041448	Unknown	3.92142	0	1.44465e-09	3.9175	3	1	0	2	0	0	0	0	Active	Inactive	2.59	0.65	2.07364	1.73061e-08
higher RPS in liver	7	8515365	ENSSSCG00000001049	HIVEP1	37.7873	17.1197	2.74092e-08	20.6663	30	6	11	13	13	0	3	10	Active	Active	2.6	5.61	-1.14967	4.31874e-05
higher RPS in liver	7	8751695	ENSSSCG00000035598	EDN1	13.6723	2.57772	1.03162e-09	11.0925	10	1	2	7	2	0	1	1	Active	Active	1.47	2.13	-0.323357	0.492842
higher RPS in liver	7	9708781	ENSSSCG00000001053	TBC1D7	19.1137	12.968	3.01596e-07	6.14375	14	0	0	14	9	0	0	9	Inactive	Active	27.26	66.74	-1.15237	1.28282e-08
higher RPS in liver	7	10201670	ENSSSCG00000021576	CD83	14.5283	5.79794	3.67121e-05	8.73125	12	0	2	10	5	0	5	0	Active	Active	4.28	17.58	-1.7944	1.4555e-12
higher RPS in liver	7	10201802	ENSSSCG00000038290	RNF182	14.5283	5.79794	3.67121e-05	8.73125	12	0	2	10	5	0	5	0	Active	Active	0.96	0.29	2.29491	2.18036e-07
higher RPS in liver	7	11006048	ENSSSCG00000042180	Unknown	33.8024	19.4667	0.009421	14.335	53	3	6	44	32	2	6	24	Inactive	Inactive	1.06	0.38	1.85697	0.146839
higher RPS in liver	7	12720718	ENSSSCG00000001065	ATXN1	37.2543	33.6794	0.00204891	3.575	26	0	16	10	25	8	7	10	Active	Active	9.7	12.04	-0.180942	0.516439
higher RPS in liver	7	19219075	ENSSSCG00000001085	DCDC2	4.12309	0.385443	7.63106e-06	3.735	3	0	3	0	1	0	0	1	Active	Active	59.82	0.87	6.11909	1.77287e-11
higher RPS in liver	7	19346850	ENSSSCG00000001089	GPLD1	7.17655	0	1.97969e-09	7.1725	5	0	2	3	0	0	0	0	Inactive	Inactive	120.58	0.52	7.93145	1.00403e-59
higher RPS in liver	7	19351361	ENSSSCG00000001090	ALDH5A1	8.67443	0	4.43707e-11	8.6675	6	0	1	5	0	0	0	0	Active	Active	101.11	36.99	1.39081	1.67291e-06
higher RPS in liver	7	19524834	ENSSSCG00000038752	C6ORF62	8.09232	0	2.23442e-10	8.0875	6	0	2	4	0	0	0	0	Active	Active	106.79	118.76	-0.125377	0.622997
higher RPS in liver	7	19585999	ENSSSCG00000001095	GMNN	12.4929	8.39883	1.18595e-06	4.09375	10	0	3	7	6	0	2	4	Active	Active	111.97	22.22	2.38724	1.63413e-14
higher RPS in liver	7	20002956	ENSSSCG00000001099	CMAH	16.3538	9.45087	1.71015e-08	6.9	12	0	1	11	7	0	0	7	Inactive	Inactive	9.7	4.23	1.46157	7.67468e-06
higher RPS in liver	7	20036739	ENSSSCG00000001100	CARMIL1	20.9875	8.03655	5.08373e-09	12.9512	16	0	0	16	6	0	0	6	Active	Active	14.77	4.41	2.00395	1.00995e-13
higher RPS in liver	7	20574462	ENSSSCG00000001107	SLC17A1	4.21939	0.695593	7.69979e-06	3.51875	3	1	0	2	1	0	0	1	Inactive	Inactive	4.76	0.9	2.05867	1.65757e-06
higher RPS in liver	7	20663423	ENSSSCG00000036191	SLC17A2	6.10654	1.95784	0.000173205	4.1475	4	1	1	2	2	0	0	2	Active	Inactive	32.76	0	13.7156	4.40417e-33
higher RPS in liver	7	20663465	ENSSSCG00000037547	SLC17A3	6.10654	1.95784	0.000173205	4.1475	4	1	1	2	2	0	0	2	Active	Inactive	32.98	0.35	6.65606	2.02016e-52
higher RPS in liver	7	21038652	ENSSSCG00000045026	Unknown	23.5796	13.9005	9.93369e-06	9.68	18	0	0	18	11	0	0	11	Inactive	Inactive	0	0	-	-
higher RPS in liver	7	21051435	ENSSSCG00000045427	Unknown	22.8912	16.6487	0.00397034	6.24375	20	0	0	20	17	0	0	17	Inactive	Inactive	0.03	0	-	-
higher RPS in liver	7	21073322	ENSSSCG00000046560	Unknown	17.8393	12.4556	0.000960931	5.385	14	0	0	14	11	0	0	11	Inactive	Inactive	0	0	-	-
higher RPS in liver	7	21211452	ENSSSCG00000039020	Unknown	5.2456	1.21607	0.00473205	4.02875	4	0	0	4	2	0	0	2	Inactive	Inactive	0	0	-	-
higher RPS in liver	7	21227153	ENSSSCG00000037929	H2BC11	6.03551	0	2.72463e-10	6.03	4	0	0	4	0	0	0	0	Active	Active	266.68	35.17	2.82201	0.00037121
higher RPS in liver	7	21226552	ENSSSCG00000047716	H2AC12	6.03551	0	2.72463e-10	6.03	4	0	0	4	0	0	0	0	Active	Active	17.64	3.05	2.56747	2.61303e-07
higher RPS in liver	7	21593389	ENSSSCG00000032609	H2AC7	5.77825	1.61701	8.78373e-05	4.1625	5	0	0	5	1	0	0	1	Active	Active	3950.56	239.28	3.96021	7.81311e-06
higher RPS in liver	7	21593602	ENSSSCG00000044013	Unknown	5.77825	1.61701	8.78373e-05	4.1625	5	0	0	5	1	0	0	1	Active	Active	27.82	27.52	0.104346	0.796721
higher RPS in liver	7	21627045	ENSSSCG00000035473	H4C12	3.2773	0	2.68449e-08	3.27125	2	0	1	1	0	0	0	0	Active	Active	73.05	8	3.06342	5.77154e-09
higher RPS in liver	7	22732141	ENSSSCG00000001234	TRIM10	6.90601	0	2.39746e-07	6.9	5	0	0	5	0	0	0	0	Active	Inactive	10.78	0.85	3.77192	5.13761e-22
higher RPS in liver	7	22730644	ENSSSCG00000001235	TRIM15	6.90601	0	2.39746e-07	6.9	5	0	0	5	0	0	0	0	Active	Inactive	6	1.61	2.08741	9.86356e-11
higher RPS in liver	7	22959398	ENSSSCG00000041364	Unknown	22.7451	13.9984	2.44966e-06	8.74875	16	0	0	16	10	0	0	10	Active	Active	1.5	0.05	4.95213	2.11887e-09
higher RPS in liver	7	22974144	ENSSSCG00000024161	Unknown	15.8816	10.5036	8.55366e-08	5.37625	10	0	0	10	7	0	2	5	Active	Inactive	1.63	1.8	0.0600306	0.916093
higher RPS in liver	7	23050195	ENSSSCG00000001342	TRIM39	4.49537	0	8.13692e-11	4.49125	3	0	2	1	0	0	0	0	Inactive	Inactive	9.7	10.71	-0.142548	0.262581
higher RPS in liver	7	23064442	ENSSSCG00000021130	RPP21	10.0774	1.45102	2.39185e-06	8.62875	7	0	3	4	1	0	0	1	Active	Active	19.97	36.65	-1.08778	0.000118573
higher RPS in liver	7	23165689	ENSSSCG00000001347	PPP1R10	4.31598	0.600461	7.12556e-06	3.7125	3	0	0	3	1	0	0	1	Active	Active	18.44	17.37	-0.0213935	0.933328
higher RPS in liver	7	23165946	ENSSSCG00000029425	MRPS18B	4.31598	0.600461	7.12556e-06	3.7125	3	0	0	3	1	0	0	1	Active	Active	160.42	176.45	-0.211636	0.323842
higher RPS in liver	7	23166304	ENSSSCG00000024604	ATAT1	4.31598	0.600461	7.12556e-06	3.7125	3	0	0	3	1	0	0	1	Active	Active	4.71	5.93	-0.199995	0.45798
higher RPS in liver	7	24325950	ENSSSCG00000030901	Unknown	14.0324	8.94178	0.000145774	5.0925	9	0	2	7	5	0	0	5	Inactive	Active	0.24	0	-	-
higher RPS in liver	7	24345466	ENSSSCG00000038570	Unknown	11.4741	7.18876	0.000513489	4.28625	7	0	0	7	4	0	0	4	Active	Active	0.07	0.05	-	-
higher RPS in liver	7	24825053	ENSSSCG00000001453	SLA-DRA	24.9851	15.8313	1.16844e-08	9.15375	17	0	4	13	11	0	3	8	Active	Active	87.27	161.1	-0.597929	0.436009
higher RPS in liver	7	27209564	ENSSSCG00000001488	GCLC	12.8854	9.07093	4.46969e-07	3.815	8	0	1	7	6	0	0	6	Active	Active	135.04	16.47	3.09402	1.03477e-20
higher RPS in liver	7	30279121	ENSSSCG00000001523	GRM4	11.4614	5.68433	0.00234665	5.77875	12	0	1	11	6	0	0	6	Active	Active	0.06	1.41	-4.18971	8.67339e-11
higher RPS in liver	7	30811768	ENSSSCG00000001533	TAF11	5.17242	0	7.93283e-07	5.16625	4	0	4	0	0	0	0	0	Active	Active	125.95	71.58	0.918569	9.14028e-06
higher RPS in liver	7	30812920	ENSSSCG00000001534	ANKS1A	5.17242	0	7.93283e-07	5.16625	4	0	4	0	0	0	0	0	Active	Active	13.24	12.69	-0.0195136	0.915174
higher RPS in liver	7	31317573	ENSSSCG00000001543	Unknown	16.3219	13.1109	0.00173018	3.2125	11	0	2	9	9	0	3	6	Inactive	Active	1884.45	3039.18	-0.685162	1.38748e-05
higher RPS in liver	7	31379114	ENSSSCG00000035972	TULP1	25.7781	20.6602	6.27451e-06	5.1175	19	0	1	18	15	0	2	13	Inactive	Active	0.05	0.03	-	-
higher RPS in liver	7	32547839	ENSSSCG00000040984	PPIL1	10.7744	6.90018	1.6592e-08	3.87125	7	0	0	7	4	0	0	4	Active	Active	66.53	32.2	1.1296	1.54401e-08
higher RPS in liver	7	32635575	ENSSSCG00000001571	MTCH1	8.14086	1.14979	2.57358e-09	6.99	6	0	1	5	1	0	1	0	Active	Active	211.67	125.55	0.662419	0.00281619
higher RPS in liver	7	32818471	ENSSSCG00000001574	AL353579.1	28.0159	21.2149	7.49139e-08	6.8	17	0	1	16	12	0	0	12	Inactive	Inactive	0	0	-	-
higher RPS in liver	7	32839146	ENSSSCG00000001577	TBC1D22B	9.75554	6.69796	7.82629e-06	3.055	7	0	0	7	5	0	0	5	Active	Active	3.08	8.08	-1.32279	1.60488e-17
higher RPS in liver	7	33378214	ENSSSCG00000039952	ZFAND3	16.2342	8.93696	4.64541e-07	7.29875	12	0	6	6	7	0	3	4	Active	Active	26.42	38.23	-0.499843	0.00266313
higher RPS in liver	7	34728835	ENSSSCG00000001592	KCNK17	43.7495	11.3943	1.49856e-11	32.355	31	0	4	27	9	0	2	7	Inactive	Inactive	0.17	0	-	-
higher RPS in liver	7	34734771	ENSSSCG00000037484	KCNK16	23.5782	2.59581	1.19314e-12	20.9812	17	0	2	15	2	0	1	1	Inactive	Inactive	0.1	0.08	-	-
higher RPS in liver	7	36471516	ENSSSCG00000039270	TREM2	3.06534	0	1.12526e-07	3.06	2	0	0	2	0	0	0	0	Inactive	Inactive	1.18	6.29	-2.36754	4.75682e-11
higher RPS in liver	7	36545763	ENSSSCG00000001618	NCR2	7.13535	2.33225	2.34124e-06	4.80375	6	0	0	6	2	0	1	1	Inactive	Inactive	0.02	0	-	-
higher RPS in liver	7	36828988	ENSSSCG00000001620	MDFI	5.33666	0	5.10244e-10	5.33	4	0	0	4	0	0	0	0	Inactive	Inactive	7.09	6.07	0.189512	0.66998
higher RPS in liver	7	36969478	ENSSSCG00000001624	FRS3	8.73273	4.6179	3.70764e-09	4.1175	6	2	1	3	3	0	1	2	Active	Active	0.43	2.94	-2.99283	3.79126e-14
higher RPS in liver	7	36969821	ENSSSCG00000034190	PRICKLE4	8.73273	4.6179	3.70764e-09	4.1175	6	2	1	3	3	0	1	2	Active	Active	77.27	162.06	-1.12444	0.0113687
higher RPS in liver	7	36969909	ENSSSCG00000050940	TOMM6	8.73273	4.6179	3.70764e-09	4.1175	6	2	1	3	3	0	1	2	Active	Active	34.81	19.44	1.1904	0.00398089
higher RPS in liver	7	37181366	ENSSSCG00000032284	CCND3	23.9235	19.8442	3.88104e-05	4.07875	17	1	0	16	14	0	1	13	Active	Active	34	33.67	-0.0142915	0.947685
higher RPS in liver	7	37180827	ENSSSCG00000022224	TAF8	23.9235	19.8442	3.88104e-05	4.07875	17	1	0	16	14	0	1	13	Active	Active	16.88	15.73	0.0154223	0.931084
higher RPS in liver	7	38389113	ENSSSCG00000001667	ZNF318	5.00116	0	1.36709e-06	4.99625	4	0	0	4	0	0	0	0	Active	Active	14.83	16.05	-0.0307419	0.869205
higher RPS in liver	7	38432732	ENSSSCG00000001680	ABCC10	4.72428	1.427	1.03894e-05	3.29875	4	0	0	4	1	0	0	1	Active	Active	5.21	9.26	-0.781058	0.0295002
higher RPS in liver	7	39267697	ENSSSCG00000040047	AL353588.1	6.17754	3.05897	6.40047e-08	3.12	4	0	1	3	2	0	0	2	Active	Active	0.65	0.71	-0.113122	0.788639
higher RPS in liver	7	42091516	ENSSSCG00000001727	TNFRSF21	36.3763	14.6351	3.37648e-09	21.7425	25	10	6	9	10	0	5	5	Active	Active	40.79	53.31	-0.271181	0.1087
higher RPS in liver	7	43730066	ENSSSCG00000001735	RHAG	3.71399	0	3.50254e-08	3.70625	3	0	0	3	0	0	0	0	Inactive	Inactive	15.03	1.41	3.65602	1.18184e-11
higher RPS in liver	7	44745422	ENSSSCG00000025535	TFAP2B	3.58785	0	1.52877e-07	3.5825	3	0	0	3	0	0	0	0	Inactive	Inactive	0.5	0.61	-0.359665	0.424709
higher RPS in liver	7	46239230	ENSSSCG00000002620	EFHC1	28.2899	21.7488	2.73346e-08	6.54125	20	2	4	14	15	0	3	12	Inactive	Inactive	2.98	5.42	-0.74853	0.00247726
higher RPS in liver	7	46509777	ENSSSCG00000002622	TMEM14A	19.3549	12.7338	1.3188e-06	6.62	14	0	1	13	8	0	3	5	Active	Active	45.46	10.79	2.12541	1.10441e-15
higher RPS in liver	7	46567728	ENSSSCG00000002623	GSTA1	7.80344	2.72481	1.41438e-06	5.07875	6	0	2	4	2	0	2	0	Inactive	Inactive	2842.9	1.63	10.6119	3.4319e-70
higher RPS in liver	7	46656451	ENSSSCG00000002627	GSTA4	11.3147	2.58336	4.62242e-08	8.73	10	0	2	8	2	0	0	2	Active	Active	477.24	29.78	3.62722	2.70939e-47
higher RPS in liver	7	46631020	ENSSSCG00000023467	Unknown	9.60583	0	5.98304e-07	9.6	8	0	2	6	0	0	0	0	Inactive	Inactive	20.07	0.05	8.66993	6.14532e-13
higher RPS in liver	7	46723585	ENSSSCG00000002628	CILK1	13.1576	2.73841	7.89602e-09	10.4175	10	0	0	10	2	0	1	1	Active	Active	8.58	14.11	-0.624828	0.000922735
higher RPS in liver	7	46723593	ENSSSCG00000002629	FBXO9	13.1576	2.73841	7.89602e-09	10.4175	10	0	0	10	2	0	1	1	Active	Active	147.2	122.19	0.342739	0.0416983
higher RPS in liver	7	46813649	ENSSSCG00000032538	GCM1	9.3582	0.376718	6.9013e-06	8.97625	8	0	2	6	1	0	0	1	Inactive	Inactive	6.75	0.78	2.98328	6.76984e-22
higher RPS in liver	7	47043818	ENSSSCG00000024149	ELOVL5	11.2428	4.87721	2.05654e-05	6.36625	9	3	3	3	4	0	2	2	Active	Active	312.34	34.46	3.11753	1.69187e-21
higher RPS in liver	7	47641162	ENSSSCG00000001757	WDR61	14.6164	9.37127	1.37145e-05	5.245	11	4	3	4	6	0	5	1	Active	Active	70.7	37.02	0.952065	9.04685e-05
higher RPS in liver	7	47839391	ENSSSCG00000027477	TBC1D2B	13.686	10.0612	1.39205e-07	3.625	9	0	3	6	7	0	1	6	Active	Active	13.22	13.75	-0.0976346	0.526424
higher RPS in liver	7	49047983	ENSSSCG00000001780	FAH	10.7006	3.79743	2.6556e-07	6.905	8	1	0	7	3	0	1	2	Active	Active	340.68	14.31	4.29531	2.59052e-53
higher RPS in liver	7	49622536	ENSSSCG00000038929	CEMIP	30.6715	16.9191	6.89409e-09	13.7525	21	5	11	5	12	4	5	3	Active	Active	3.62	0.24	4.04616	6.23088e-28
higher RPS in liver	7	52556884	ENSSSCG00000001810	PDE8A	18.7085	1.29145	2.5862e-10	17.4187	13	0	6	7	1	0	0	1	Active	Active	54.67	19.42	1.51029	5.93373e-23
higher RPS in liver	7	53527896	ENSSSCG00000001820	HDDC3	8.07211	2.6335	4.94599e-08	5.44	6	0	3	3	2	0	0	2	Active	Active	116.41	69.74	0.776483	0.00130858
higher RPS in liver	7	53529605	ENSSSCG00000001821	UNC45A	8.07211	2.6335	4.94599e-08	5.44	6	0	3	3	2	0	0	2	Inactive	Active	16.56	16.68	0.0703506	0.798352
higher RPS in liver	7	53590776	ENSSSCG00000001823	UROC1	10.772	0	4.55626e-11	10.7662	6	0	2	4	0	0	0	0	Active	Active	178.71	2.18	6.13987	3.6955e-115
higher RPS in liver	7	53640123	ENSSSCG00000001824	ZXDC	4.30981	0.795208	5.33398e-05	3.51375	4	0	2	2	1	0	0	1	Active	Active	18.13	34.68	-0.957999	0.000166211
higher RPS in liver	7	53909425	ENSSSCG00000001826	CFAP100	27.1537	20.3793	1.11892e-06	6.77375	18	0	7	11	14	0	1	13	Active	Active	3.25	0.12	4.93357	1.84969e-12
higher RPS in liver	7	54199932	ENSSSCG00000032460	MYADM	3.56839	0	2.11483e-06	3.56375	3	0	0	3	0	0	0	0	Active	Inactive	0.46	0	-	-
higher RPS in liver	7	54655726	ENSSSCG00000001835	ABHD2	17.7409	10.5049	4.78681e-07	7.2375	11	0	5	6	7	0	7	0	Active	Active	27.76	17.6	0.702421	0.000157362
higher RPS in liver	7	55320357	ENSSSCG00000027052	PEX11A	16.1384	2.64545	6.03634e-10	13.4938	12	0	5	7	2	0	0	2	Active	Active	58.34	17.5	1.69615	2.5006e-14
higher RPS in liver	7	55325732	ENSSSCG00000001847	MESP1	26.0775	7.0836	1.01725e-10	18.9975	18	0	9	9	5	0	3	2	Inactive	Active	5.33	1.59	1.73543	7.69666e-14
higher RPS in liver	7	55343134	ENSSSCG00000001848	MESP2	14.1096	2.28706	3.38927e-07	11.8238	10	0	5	5	2	0	0	2	Active	Active	7.19	2.27	1.70317	6.031e-14
higher RPS in liver	7	55373881	ENSSSCG00000001849	ANPEP	3.97869	0	1.20406e-08	3.97125	3	0	2	1	0	0	0	0	Active	Active	70.69	1.83	5.30835	1.30245e-109
higher RPS in liver	7	55462823	ENSSSCG00000030174	AP3S2	8.35162	1.17254	8.81312e-09	7.17625	6	0	0	6	1	0	0	1	Active	Active	96.45	74.41	0.448446	0.0664412
higher RPS in liver	7	58549323	ENSSSCG00000027478	PPCDC	24.4482	19.0057	3.43962e-07	5.44375	16	0	2	14	12	0	0	12	Active	Active	20.69	13.87	0.542328	0.0844905
higher RPS in liver	7	58786100	ENSSSCG00000001901	CYP1A2	9.20359	5.60551	5.71524e-07	3.6	7	0	3	4	4	0	0	4	Inactive	Inactive	50.18	0.05	10.19	6.70001e-14
higher RPS in liver	7	58780105	ENSSSCG00000001906	CYP1A1	11.3493	8.28766	2.65276e-05	3.06375	8	0	5	3	6	0	0	6	Inactive	Inactive	376.09	0.84	9.13705	2.08093e-85
higher RPS in liver	7	61033856	ENSSSCG00000001931	GRAMD2A	8.9172	5.74873	1.99339e-06	3.16875	6	0	0	6	4	0	0	4	Active	Active	0.38	1.71	-1.96694	0.000114438
higher RPS in liver	7	62471228	ENSSSCG00000037634	FOXA1	17.0219	3.97162	1.05689e-10	13.05	12	0	4	8	3	0	0	3	Active	Active	19.2	0.04	9.17083	2.40497e-50
higher RPS in liver	7	64508016	ENSSSCG00000001952	NFKBIA	59.9519	54.3402	8.48758e-07	5.61125	39	0	7	32	36	0	16	20	Active	Active	121.91	92.21	0.307377	0.289329
higher RPS in liver	7	64763281	ENSSSCG00000001950	PSMA6	4.09337	0	2.54487e-11	4.0875	3	0	1	2	0	0	0	0	Active	Active	622.15	632.44	0.0869514	0.660838
higher RPS in liver	7	64763050	ENSSSCG00000031498	PPP2R3C	4.09337	0	2.54487e-11	4.0875	3	0	1	2	0	0	0	0	Active	Active	71.53	43.32	0.786048	0.00616365
higher RPS in liver	7	74294948	ENSSSCG00000001977	STXBP6	8.94148	1.23558	7.28852e-09	7.70625	7	7	0	0	1	0	0	1	Active	Active	54.86	34.4	0.72064	0.0014231
higher RPS in liver	7	74879499	ENSSSCG00000051429	Unknown	3.26194	0	3.32459e-10	3.2575	2	0	0	2	0	0	0	0	Active	Active	20.27	2.86	3.05756	1.95059e-06
higher RPS in liver	7	75056798	ENSSSCG00000001994	TINF2	12.4059	5.25018	3.3029e-11	7.15625	8	0	3	5	3	0	1	2	Active	Active	30.11	38.51	-0.384119	0.030799
higher RPS in liver	7	75069772	ENSSSCG00000026947	GMPR2	5.22208	1.39378	2.14254e-09	3.82875	4	0	2	2	1	0	0	1	Active	Active	133.4	63.61	1.17267	1.4309e-06
higher RPS in liver	7	77058644	ENSSSCG00000033721	TRAC	15.009	10.8339	0.0301361	4.175	13	0	0	13	9	0	0	9	Inactive	Inactive	5.26	1.62	1.91163	9.73904e-07
higher RPS in liver	7	76975601	ENSSSCG00000041090	TRDV1	18.118	13.126	0.00092825	4.99	16	0	0	16	12	0	0	12	Inactive	Inactive	0.17	0	-	-
higher RPS in liver	7	76979999	ENSSSCG00000039362	Unknown	18.118	13.126	0.00092825	4.99	16	0	0	16	12	0	0	12	Inactive	Inactive	0.08	0	-	-
higher RPS in liver	7	76989325	ENSSSCG00000021202	TRAV23DV6	16.2461	11.557	0.000692578	4.68875	14	0	0	14	9	0	0	9	Inactive	Inactive	0.04	0	-	-
higher RPS in liver	7	77020479	ENSSSCG00000033153	TRAV19	12.2238	9.20201	0.00343068	3.02125	8	0	0	8	6	0	0	6	Inactive	Inactive	0	0	-	-
higher RPS in liver	7	77075652	ENSSSCG00000036734	TRAV12-3	20.5898	9.44184	7.90439e-05	11.1475	19	0	0	19	8	0	0	8	Inactive	Inactive	0.75	0.89	-0.175102	0.797947
higher RPS in liver	7	77157718	ENSSSCG00000032379	TRAV23DV6	7.92959	4.92031	0.00112676	3.01125	6	0	0	6	4	0	0	4	Inactive	Inactive	0.11	0	-	-
higher RPS in liver	7	77172859	ENSSSCG00000039709	TRAV22	5.92854	2.40134	2.17745e-06	3.525	5	0	0	5	2	0	0	2	Inactive	Active	1.47	1.07	0.638896	0.211596
higher RPS in liver	7	77194251	ENSSSCG00000036833	TRAV23DV6	6.83041	3.75578	0.00858727	3.07375	8	0	0	8	4	0	0	4	Inactive	Inactive	0.13	0	-	-
higher RPS in liver	7	77268291	ENSSSCG00000002081	Unknown	23.7984	17.4357	0.00482093	6.36125	18	0	0	18	13	0	0	13	Inactive	Inactive	0.12	0.01	-	-
higher RPS in liver	7	77277753	ENSSSCG00000031752	TRAV23DV6	14.3358	11.1189	0.00380555	3.21875	11	0	0	11	9	0	0	9	Inactive	Inactive	0.08	0.18	-	-
higher RPS in liver	7	77284631	ENSSSCG00000036513	TRAV22	14.9106	11.2811	0.00246138	3.63	10	0	0	10	8	0	0	8	Inactive	Inactive	0.04	0	-	-
higher RPS in liver	7	77333250	ENSSSCG00000042961	Unknown	15.3215	7.59705	1.46755e-05	7.72375	12	0	0	12	5	0	0	5	Inactive	Inactive	0	0.01	-	-
higher RPS in liver	7	79119239	ENSSSCG00000039694	Unknown	16.5474	12.8212	0.00593218	3.7275	14	0	0	14	11	0	0	11	Inactive	Inactive	0.04	0	-	-
higher RPS in liver	7	79323651	ENSSSCG00000041836	Unknown	22.1387	16.6934	1.79081e-06	5.44625	13	0	0	13	9	0	0	9	Active	Active	0	0.16	-	-
higher RPS in liver	7	79345411	ENSSSCG00000002187	OR4K17	14.6721	11.5726	5.67451e-05	3.09875	10	0	1	9	8	0	0	8	Active	Active	0.2	0.25	-	-
higher RPS in liver	7	79458477	ENSSSCG00000047273	Unknown	8.41399	4.98479	0.00679181	3.42875	7	0	0	7	4	0	0	4	Inactive	Inactive	0.01	0	-	-
higher RPS in liver	7	79601696	ENSSSCG00000034613	Unknown	13.7546	9.17033	0.00133298	4.58375	11	0	0	11	6	0	0	6	Active	Active	0.03	0.07	-	-
higher RPS in liver	7	79719974	ENSSSCG00000050271	Unknown	39.7361	19.3186	0.000493044	20.4163	50	0	0	50	27	0	0	27	Inactive	Inactive	0	0	-	-
higher RPS in liver	7	79766743	ENSSSCG00000048410	Unknown	18.817	12.6924	0.000104627	6.125	14	0	0	14	10	0	0	10	Inactive	Inactive	0.01	0	-	-
higher RPS in liver	7	79873867	ENSSSCG00000002190	Unknown	14.2223	10.9692	0.00556944	3.25125	11	0	0	11	9	0	0	9	Inactive	Inactive	0	0	-	-
higher RPS in liver	7	79881167	ENSSSCG00000032675	Unknown	10.4362	6.90355	0.000536034	3.5325	8	0	0	8	6	0	0	6	Inactive	Inactive	0.02	0	-	-
higher RPS in liver	7	81669494	ENSSSCG00000002252	ARRDC4	3.9624	0	2.09854e-09	3.95625	3	0	3	0	0	0	0	0	Active	Active	79.93	49.41	0.976599	0.000156803
higher RPS in liver	7	91413607	ENSSSCG00000002295	VTI1B	7.96509	2.7322	2.85306e-08	5.2325	6	2	0	4	2	0	0	2	Active	Active	19.72	23.16	-0.0512266	0.788485
higher RPS in liver	7	91452405	ENSSSCG00000002296	RDH11	6.92693	0	6.39347e-09	6.9225	5	4	0	1	0	0	0	0	Active	Active	563.84	22.11	4.64328	4.63409e-278
higher RPS in liver	7	91448332	ENSSSCG00000049034	Unknown	12.2715	0	3.91252e-08	12.2662	9	8	0	1	0	0	0	0	Active	Inactive	0.87	0.29	1.79423	6.46328e-05
higher RPS in liver	7	92644842	ENSSSCG00000036702	ACTN1	13.979	6.40405	2.74735e-07	7.57625	10	0	6	4	5	0	5	0	Active	Active	80.56	28.2	1.63634	2.61114e-11
higher RPS in liver	7	93475973	ENSSSCG00000002314	SMOC1	15.7874	5.06322	1.77156e-09	10.7238	11	0	0	11	4	0	2	2	Inactive	Inactive	38.53	4.25	3.1552	1.98046e-38
higher RPS in liver	7	96586451	ENSSSCG00000002341	PAPLN	3.55099	0	1.80369e-07	3.54625	3	0	0	3	0	0	0	0	Active	Active	9.09	3.19	1.44697	0.00106928
higher RPS in liver	7	96799975	ENSSSCG00000022178	NUMB	31.7103	14.661	1.69696e-09	17.0512	23	0	10	13	10	0	0	10	Inactive	Inactive	43.94	23.73	0.901321	3.46324e-12
higher RPS in liver	7	96823156	ENSSSCG00000002344	RIOX1	32.1639	17.8773	3.6776e-07	14.2875	24	0	13	11	13	0	1	12	Active	Active	9.2	22.89	-1.12792	3.10949e-05
higher RPS in liver	7	97585679	ENSSSCG00000038231	ABCD4	8.19579	3.82675	1.64316e-07	4.37	6	0	2	4	3	0	0	3	Active	Active	39.55	25.9	0.633597	0.0275118
higher RPS in liver	7	97614707	ENSSSCG00000002361	VRTN	10.8441	3.77662	9.86343e-08	7.06625	8	0	2	6	3	0	0	3	Inactive	Inactive	0.01	0	-	-
higher RPS in liver	7	97740331	ENSSSCG00000002366	NPC2	16.0573	4.00411	4.23514e-10	12.0525	12	0	0	12	3	0	1	2	Active	Active	172.06	121.6	0.484712	0.124312
higher RPS in liver	7	97740490	ENSSSCG00000002367	ISCA2	16.0573	4.00411	4.23514e-10	12.0525	12	0	0	12	3	0	1	2	Active	Active	119.29	54.49	1.1166	2.67567e-07
higher RPS in liver	7	98368601	ENSSSCG00000035684	TMED10	15.3173	10.624	2.93808e-08	4.69125	10	0	2	8	7	0	0	7	Inactive	Inactive	718.35	228.52	1.70093	3.92881e-22
higher RPS in liver	7	98718095	ENSSSCG00000021606	FLVCR2	20.148	14.4372	3.11641e-07	5.71375	13	1	2	10	10	0	8	2	Active	Active	89.18	6.68	3.67546	1.27055e-54
higher RPS in liver	7	111766223	ENSSSCG00000002430	EFCAB11	4.53473	1.28252	0.000156975	3.255	4	0	0	4	1	0	0	1	Active	Active	31.69	19.92	0.792309	6.37742e-05
higher RPS in liver	7	111767089	ENSSSCG00000002431	TDP1	4.53473	1.28252	0.000156975	3.255	4	0	0	4	1	0	0	1	Active	Active	10.19	5.94	0.791492	0.000944863
higher RPS in liver	7	112831659	ENSSSCG00000002438	Unknown	18.5227	15.0053	9.58255e-07	3.5175	13	0	0	13	10	8	1	1	Inactive	Inactive	0.72	2.09	-1.48273	0.383784
higher RPS in liver	7	114217103	ENSSSCG00000002452	LGMN	7.24619	1.41746	1.49135e-08	5.83125	5	0	0	5	1	0	0	1	Active	Inactive	973.69	161.58	2.58539	1.27581e-35
higher RPS in liver	7	114237145	ENSSSCG00000002455	GOLGA5	21.3723	13.7622	2.96294e-07	7.60875	14	0	0	14	9	0	1	8	Active	Active	104.57	41.17	1.33971	1.61044e-09
higher RPS in liver	7	114520793	ENSSSCG00000002457	ITPK1	5.3758	0	2.9702e-10	5.37125	4	0	4	0	0	0	0	0	Active	Active	12.67	5.59	1.14098	1.10145e-09
higher RPS in liver	7	115554570	ENSSSCG00000002475	SERPINA6	5.27557	0	2.58099e-08	5.2725	4	0	0	4	0	0	0	0	Active	Active	187.22	0.07	11.8424	3.825e-65
higher RPS in liver	7	115682082	ENSSSCG00000002479	SERPINA11	4.92681	0	1.96746e-07	4.92375	4	0	2	2	0	0	0	0	Active	Inactive	278.26	0.06	12.7237	6.07122e-63
higher RPS in liver	7	115696632	ENSSSCG00000022251	UABP-2	5.77863	0	1.6058e-07	5.7725	4	0	1	3	0	0	0	0	Inactive	Inactive	4.15	0	8.35277	9.1296e-11
higher RPS in liver	7	115828282	ENSSSCG00000031595	SERPINA3	27.9336	10.5683	1.05542e-07	17.365	19	3	2	14	7	0	0	7	Active	Inactive	1440.33	0.59	11.235	2.54924e-10
higher RPS in liver	7	115871451	ENSSSCG00000002486	SERPINA3	25.4327	13.2581	1.66668e-08	12.175	16	0	3	13	9	0	0	9	Active	Inactive	1171.53	0.54	11.2569	1.07662e-07
higher RPS in liver	7	115921370	ENSSSCG00000002483	SERPINA3	20.399	9.52818	6.94859e-07	10.8688	13	1	0	12	6	0	0	6	Active	Inactive	354.64	0.19	10.7153	9.64007e-13
higher RPS in liver	7	117491934	ENSSSCG00000043182	Unknown	8.14895	1.38172	3.3703e-09	6.77	6	0	2	4	1	0	1	0	Inactive	Inactive	0.06	0	-	-
higher RPS in liver	7	117676398	ENSSSCG00000002505	PAPOLA	3.3423	0	0.000107359	3.33625	3	0	0	3	0	0	0	0	Active	Active	202.28	178.86	0.244692	0.152123
higher RPS in liver	7	119689324	ENSSSCG00000039414	Unknown	20.9918	7.76576	3.88593e-06	13.2238	31	0	1	30	11	0	0	11	Inactive	Inactive	3.87	2.14	1.19738	0.015657
higher RPS in liver	7	120597711	ENSSSCG00000037284	CCDC85C	13.7655	5.11325	4.88612e-10	8.65	9	0	5	4	4	0	0	4	Active	Active	23.65	0.7	4.95809	3.22835e-82
higher RPS in liver	5	251553	ENSSSCG00000047075	MIOX	23.2212	1.90053	9.00232e-09	21.3188	18	0	4	14	2	0	0	2	Active	Active	6.43	0.23	4.33376	3.49666e-29
higher RPS in liver	5	255601	ENSSSCG00000023749	MIOX	9.15815	0	1.35553e-08	9.1525	7	0	1	6	0	0	0	0	Active	Active	217.89	1.05	7.30216	1.37296e-70
higher RPS in liver	5	260786	ENSSSCG00000000968	SBF1	9.28982	0	4.56057e-08	9.285	7	0	0	7	0	0	0	0	Active	Active	18.92	38.84	-1.19244	3.29356e-06
higher RPS in liver	5	445525	ENSSSCG00000000972	TUBGCP6	15.205	5.8158	3.91628e-09	9.38875	11	0	1	10	4	0	0	4	Active	Active	8.58	20.43	-1.30958	1.99481e-07
higher RPS in liver	5	480779	ENSSSCG00000000973	SELENOO	33.1229	22.0086	2.4741e-07	11.1137	24	0	6	18	15	0	2	13	Active	Active	35.79	41.28	-0.268343	0.353085
higher RPS in liver	5	2818784	ENSSSCG00000038763	CERK	3.93979	0	1.78547e-07	3.93375	3	0	0	3	0	0	0	0	Active	Active	35.41	10.59	1.7758	7.54818e-20
higher RPS in liver	5	2947801	ENSSSCG00000031441	GRAMD4	31.9545	21.9951	6.00362e-07	9.95875	21	0	2	19	15	0	0	15	Active	Active	20.16	7.78	1.22396	4.01294e-11
higher RPS in liver	5	2980069	ENSSSCG00000031361	CELSR1	38.5627	17.9631	4.65621e-09	20.6	25	0	6	19	13	0	0	13	Active	Active	2.49	1.07	1.37488	3.03264e-06
higher RPS in liver	5	5993808	ENSSSCG00000000037	ARFGAP3	26.303	20.4471	1.51968e-05	5.85625	18	0	6	12	14	0	0	14	Active	Active	107.78	57.18	0.906716	3.52929e-06
higher RPS in liver	5	6672570	ENSSSCG00000038658	Unknown	19.4739	15.095	1.53196e-06	4.37875	15	0	3	12	11	0	5	6	Inactive	Inactive	0.07	0.02	-	-
higher RPS in liver	5	6784672	ENSSSCG00000026092	SREBF2	10.0422	1.49146	1.1266e-07	8.55375	7	0	0	7	1	0	0	1	Active	Active	35.11	54.78	-0.783685	0.0103052
higher RPS in liver	5	7086587	ENSSSCG00000037958	TOB2	7.21404	2.84552	1.11982e-06	4.3675	5	0	0	5	2	0	0	2	Active	Active	19.41	53.6	-1.51459	2.37314e-08
higher RPS in liver	5	7144498	ENSSSCG00000035152	TEF	6.02002	0	1.10852e-06	6.015	5	0	3	2	0	0	0	0	Active	Active	23.31	19.99	-0.06237	0.804151
higher RPS in liver	5	7393760	ENSSSCG00000000068	EP300	15.6277	12.0651	2.90586e-05	3.565	11	0	0	11	8	0	5	3	Active	Active	14.79	37.06	-1.13809	8.83334e-07
higher RPS in liver	5	7515370	ENSSSCG00000034230	Unknown	34.851	27.3473	9.60111e-07	7.505	24	0	0	24	18	0	8	10	Active	Active	249.75	281.83	-0.0847998	0.695764
higher RPS in liver	5	8902297	ENSSSCG00000020873	SYNGR1	15.3374	10.262	3.75959e-06	5.075	11	0	0	11	7	0	0	7	Active	Active	9	77.5	-2.93925	1.83064e-24
higher RPS in liver	5	10521736	ENSSSCG00000000130	CYTH4	6.84439	0	2.06383e-10	6.84125	5	0	0	5	0	0	0	0	Active	Active	8.11	5.47	0.54372	0.104273
higher RPS in liver	5	12242637	ENSSSCG00000031866	TIMP3	17.4679	12.7681	4.48072e-07	4.69875	12	5	1	6	8	0	4	4	Active	Active	69.86	201.93	-1.4684	1.28687e-13
higher RPS in liver	5	14102205	ENSSSCG00000032861	NUAK1	27.0815	24.0003	0.000432593	3.08	18	5	1	12	15	0	6	9	Active	Active	7.86	13.5	-0.847179	5.98425e-09
higher RPS in liver	5	15097665	ENSSSCG00000000186	RHEBL1	5.8967	1.47249	4.18165e-08	4.42125	4	0	2	2	1	0	1	0	Active	Active	2.07	0.69	1.75577	0.00451159
higher RPS in liver	5	15285294	ENSSSCG00000000195	PRPH	4.18202	0	6.79388e-09	4.17625	3	0	0	3	0	0	0	0	Active	Active	0.42	0.37	-	-
higher RPS in liver	5	15312520	ENSSSCG00000000197	C1QL4	12.2203	8.76701	2.63795e-07	3.45375	8	0	0	8	6	0	2	4	Active	Active	4.98	0.13	5.68304	2.08272e-18
higher RPS in liver	5	15495156	ENSSSCG00000000203	KCNH3	6.97996	2.88828	1.22748e-07	4.09	5	0	0	5	2	0	0	2	Active	Active	0.04	0.11	-	-
higher RPS in liver	5	15876407	ENSSSCG00000000211	AQP5	13.4754	8.31979	2.47278e-08	5.155	8	0	0	8	5	0	0	5	Active	Active	0.03	0.42	-	-
higher RPS in liver	5	15904707	ENSSSCG00000000217	RACGAP1	4.89174	1.43306	1.51434e-07	3.4575	3	0	0	3	1	0	0	1	Active	Active	44.39	13.23	1.69747	0.00300261
higher RPS in liver	5	15992459	ENSSSCG00000000215	SMARCD1	12.9494	9.75617	1.16299e-05	3.1925	9	0	6	3	6	0	4	2	Active	Active	6.27	12.18	-0.914329	0.000461086
higher RPS in liver	5	16842710	ENSSSCG00000028060	SLC4A8	12.8241	6.50561	5.35675e-06	6.3175	8	0	2	6	4	0	0	4	Active	Active	0.36	0.22	-	-
higher RPS in liver	5	17248664	ENSSSCG00000000231	ANKRD33	12.3592	4.55321	2.75254e-05	7.8025	10	0	2	8	4	0	0	4	Active	Inactive	9.74	0	9.3313	1.24118e-16
higher RPS in liver	5	17868402	ENSSSCG00000000248	KRT5	4.18681	0.918231	0.000396614	3.2675	4	0	0	4	1	0	0	1	Inactive	Inactive	0.22	0.11	-	-
higher RPS in liver	5	18180404	ENSSSCG00000000252	KRT8	13.0753	2.08282	1.05439e-08	10.9925	8	0	0	8	2	0	1	1	Active	Active	823.99	13.13	6.09658	2.8551e-39
higher RPS in liver	5	18218378	ENSSSCG00000051741	Unknown	3.32136	0	5.0558e-10	3.3175	2	0	0	2	0	0	0	0	Active	Active	0	0	-	-
higher RPS in liver	5	18217691	ENSSSCG00000000253	KRT18	3.32136	0	5.0558e-10	3.3175	2	0	0	2	0	0	0	0	Active	Active	778.77	4.82	7.45891	2.12053e-95
higher RPS in liver	5	19485096	ENSSSCG00000000288	HNRNPA1	4.17004	0	2.0207e-07	4.16375	3	0	0	3	0	0	0	0	Active	Active	652.42	458.05	0.814656	1.32461e-06
higher RPS in liver	5	19583221	ENSSSCG00000000292	ZNF385A	6.30849	1.50702	2.5783e-07	4.80375	4	0	4	0	1	0	1	0	Active	Active	1.16	19.18	-3.90512	5.9005e-38
higher RPS in liver	5	20372616	ENSSSCG00000033458	OR6C76	22.8928	15.0344	0.00187756	7.8575	19	0	1	18	10	0	0	10	Inactive	Inactive	0	0	-	-
higher RPS in liver	5	20387216	ENSSSCG00000045110	OR6C2	14.6175	9.32196	0.000363013	5.295	12	0	1	11	8	0	0	8	Inactive	Inactive	0.03	0	-	-
higher RPS in liver	5	20424196	ENSSSCG00000049837	OR6C68	5.88837	2.49202	0.0219038	3.39625	7	0	0	7	3	0	0	3	Inactive	Inactive	0.06	0	-	-
higher RPS in liver	5	20520151	ENSSSCG00000036827	OR6C75	15.6396	12.3133	0.00140634	3.32625	11	0	1	10	9	0	0	9	Inactive	Inactive	0.02	0	-	-
higher RPS in liver	5	20547193	ENSSSCG00000047005	OR6C1	11.9851	6.56721	3.987e-05	5.4175	11	0	0	11	5	0	0	5	Inactive	Inactive	0.12	0	-	-
higher RPS in liver	5	20586647	ENSSSCG00000039228	Unknown	12.1256	7.11377	4.07361e-05	5.01125	10	0	1	9	5	0	0	5	Inactive	Inactive	0.03	0	-	-
higher RPS in liver	5	20596426	ENSSSCG00000032840	Unknown	7.51315	4.15623	0.000465873	3.3575	7	0	0	7	3	0	0	3	Inactive	Inactive	0.27	0.68	-1.11566	0.00168285
higher RPS in liver	5	20696666	ENSSSCG00000044305	OR6C68	6.41368	0.913547	0.00111076	5.49875	9	0	0	9	1	0	0	1	Inactive	Inactive	0.62	0.44	0.787227	0.293277
higher RPS in liver	5	20831870	ENSSSCG00000041091	Unknown	16.2395	11.7671	0.0031947	4.475	14	0	0	14	8	0	0	8	Inactive	Inactive	0.01	0	-	-
higher RPS in liver	5	20982685	ENSSSCG00000044498	Unknown	18.115	8.60859	0.000636759	9.50375	15	0	0	15	4	0	0	4	Active	Inactive	0.13	0.13	-	-
higher RPS in liver	5	21072860	ENSSSCG00000040235	Unknown	3.53104	0	0.000138955	3.52625	4	0	0	4	0	0	0	0	Inactive	Inactive	0	0	-	-
higher RPS in liver	5	21176232	ENSSSCG00000000361	CD63	3.75279	0	4.01492e-06	3.7475	3	0	0	3	0	0	0	0	Active	Active	733.48	745.28	-0.0261283	0.927734
higher RPS in liver	5	21787521	ENSSSCG00000000399	TIMELESS	3.32699	0	1.85073e-09	3.3225	2	0	0	2	0	0	0	0	Active	Active	46.62	5.38	3.11477	3.5265e-22
higher RPS in liver	5	21793592	ENSSSCG00000000400	MIP	6.86192	2.95997	7.33389e-08	3.9025	4	0	0	4	2	0	0	2	Inactive	Active	0.43	0.01	-	-
higher RPS in liver	5	21820001	ENSSSCG00000000401	GLS2	3.90427	0	5.96501e-07	3.8975	3	3	0	0	0	0	0	0	Active	Active	231.97	0.09	11.85	1.3641e-90
higher RPS in liver	5	22057926	ENSSSCG00000020830	NACA	6.74213	0.97864	3.00363e-05	5.76125	6	0	0	6	1	0	0	1	Active	Active	316.12	216.16	0.624389	0.00147895
higher RPS in liver	5	22089436	ENSSSCG00000026055	PRIM1	18.6463	1.49278	5.62349e-08	17.1525	13	0	0	13	2	0	0	2	Active	Active	73.09	16.51	2.21684	1.43501e-11
higher RPS in liver	5	22092578	ENSSSCG00000027854	HSD17B6	30.4957	2.09567	4.39876e-09	28.3987	19	6	0	13	2	0	1	1	Active	Inactive	403.41	1.62	8.05155	8.30156e-76
higher RPS in liver	5	22158691	ENSSSCG00000031735	Unknown	4.23223	0	5.17998e-05	4.22625	4	0	0	4	0	0	0	0	Inactive	Inactive	3.95	0	7.76846	1.75426e-07
higher RPS in liver	5	22244086	ENSSSCG00000000415	SDR9C7	13.746	1.63229	1.03358e-07	12.1125	9	7	0	2	2	0	0	2	Inactive	Inactive	1.89	0.03	8.06788	4.84826e-11
higher RPS in liver	5	22292434	ENSSSCG00000000419	RDH16	16.7155	4.55461	1.31734e-06	12.1613	13	3	2	8	3	0	3	0	Active	Active	280.16	10.31	5.00874	6.62933e-44
higher RPS in liver	5	22304588	ENSSSCG00000037701	GPR182	3.90606	0	1.90265e-07	3.90125	3	0	0	3	0	0	0	0	Active	Active	13.79	0.49	4.75601	9.70235e-73
higher RPS in liver	5	22314655	ENSSSCG00000037617	ZBTB39	4.12351	0	8.17985e-10	4.12	3	0	0	3	0	0	0	0	Active	Active	14.5	21.56	-0.449132	0.0800743
higher RPS in liver	5	30525948	ENSSSCG00000000475	IRAK3	12.6546	0	6.36765e-10	12.65	9	0	5	4	0	0	0	0	Active	Active	38.74	9.78	2.14568	1.13343e-16
higher RPS in liver	5	32910259	ENSSSCG00000032595	RAP1B	15.5515	2.7138	4.56995e-08	12.8387	13	0	9	4	2	0	0	2	Active	Active	217.44	74.24	1.68508	1.80945e-09
higher RPS in liver	5	33264317	ENSSSCG00000023630	CPM	5.41855	1.4284	8.93963e-08	3.99	4	0	0	4	1	0	0	1	Active	Active	2.93	11	-1.74373	1.00262e-11
higher RPS in liver	5	35463279	ENSSSCG00000030511	LGR5	3.84515	0	6.55711e-08	3.83875	3	0	3	0	0	0	0	0	Active	Active	2.59	1.48	0.96832	0.0557243
higher RPS in liver	5	35671191	ENSSSCG00000000509	ZFC3H1	7.08571	0	1.0752e-06	7.08	6	0	2	4	0	0	0	0	Active	Active	40.51	29.32	0.512672	0.0118181
higher RPS in liver	5	35671280	ENSSSCG00000021270	THAP2	7.08571	0	1.0752e-06	7.08	6	0	2	4	0	0	0	0	Active	Active	27.1	26.77	0.216419	0.396411
higher RPS in liver	5	42419262	ENSSSCG00000036980	Unknown	4.94151	0	5.93442e-09	4.935	4	0	1	3	0	0	0	0	Inactive	Inactive	0	0	-	-
higher RPS in liver	5	43913655	ENSSSCG00000027447	TMTC1	3.83906	0	5.39422e-08	3.83625	3	0	1	2	0	0	0	0	Active	Active	14.55	19.98	-0.447017	0.151849
higher RPS in liver	5	47847454	ENSSSCG00000000559	RASSF8	6.79777	1.34322	2.76787e-09	5.455	5	0	4	1	1	0	1	0	Active	Active	50	32.99	0.753906	0.00211158
higher RPS in liver	5	47847156	ENSSSCG00000027144	LMNTD1	6.79777	1.34322	2.76787e-09	5.455	5	0	4	1	1	0	1	0	Active	Active	1.54	3.94	-1.16563	5.74e-06
higher RPS in liver	5	48766390	ENSSSCG00000000563	IRAG2	11.1027	2.5703	3.6376e-12	8.53375	8	0	0	8	2	0	0	2	Inactive	Inactive	15.49	6.61	1.36207	0.00326248
higher RPS in liver	5	51154763	ENSSSCG00000043201	Unknown	8.78266	2.58983	9.90752e-09	6.19375	7	0	0	7	2	0	0	2	Inactive	Inactive	0.66	1.51	-0.889012	0.00879609
higher RPS in liver	5	51395984	ENSSSCG00000026594	SULT1A3	10.3414	0	1.45605e-09	10.3362	8	0	1	7	0	0	0	0	Inactive	Inactive	0.1	0	-	-
higher RPS in liver	5	51459338	ENSSSCG00000034733	CMAS	4.07127	0	2.54625e-09	4.06625	3	0	1	2	0	0	0	0	Inactive	Active	162.41	39.35	2.11617	1.16039e-20
higher RPS in liver	5	51536526	ENSSSCG00000000571	ABCC9	9.60376	1.31181	2.75503e-08	8.2925	8	0	2	6	1	0	1	0	Active	Active	22.17	150.84	-2.70661	1.33505e-23
higher RPS in liver	5	51537774	ENSSSCG00000000573	KCNJ8	9.60376	1.31181	2.75503e-08	8.2925	8	0	2	6	1	0	1	0	Active	Active	10.64	31.91	-1.43673	3.57211e-15
higher RPS in liver	5	52020816	ENSSSCG00000000583	PYROXD1	3.18925	0	8.89669e-05	3.18375	3	0	1	2	0	0	0	0	Active	Active	28.51	11.28	1.40058	1.88444e-16
higher RPS in liver	5	52217448	ENSSSCG00000021998	SLCO1B1	19.6738	0	5.3169e-12	19.67	13	0	5	8	0	0	0	0	Inactive	Inactive	1443.43	0.97	10.5379	7.71023e-301
higher RPS in liver	5	52738829	ENSSSCG00000028662	PDE3A	6.2559	0	3.5456e-08	6.25125	5	0	0	5	0	0	0	0	Active	Active	28.44	22.99	0.447227	0.0504119
higher RPS in liver	5	57600089	ENSSSCG00000000605	ERP27	17.8111	12.7824	2.37011e-05	5.03	12	0	4	8	9	0	3	6	Inactive	Inactive	5.9	0.4	4.64962	1.47371e-07
higher RPS in liver	5	57708897	ENSSSCG00000000607	ART4	23.5493	8.76906	7.98705e-07	14.78	16	0	3	13	6	0	4	2	Active	Inactive	18.73	19.79	-0.169728	0.731885
higher RPS in liver	5	57746302	ENSSSCG00000000610	SMCO3	18.0498	4.43158	1.45351e-10	13.6188	13	0	3	10	3	0	3	0	Inactive	Inactive	0.79	1.09	-0.870792	0.476947
higher RPS in liver	5	57750015	ENSSSCG00000000611	Unknown	8.29113	2.80543	8.87499e-07	5.48625	6	0	3	3	2	0	2	0	Active	Active	62.3	79.51	-0.343998	0.00181601
higher RPS in liver	5	59727522	ENSSSCG00000041213	Unknown	7.93223	4.03539	1.08387e-07	3.8975	6	0	1	5	3	0	3	0	Active	Active	1.86	2.06	-0.117056	0.742347
higher RPS in liver	5	60072940	ENSSSCG00000032804	BORCS5	29.576	5.13899	7.2639e-14	24.4375	22	1	3	18	4	0	1	3	Active	Active	43.25	60.45	-0.296613	0.0841782
higher RPS in liver	5	60776750	ENSSSCG00000024152	ETV6	41.7188	2.6765	2.29888e-11	39.0412	30	5	0	25	2	0	0	2	Active	Active	12.19	6.14	1.08653	9.57247e-06
higher RPS in liver	5	61081171	ENSSSCG00000040242	Unknown	16.4012	10.831	0.000256128	5.57	15	0	0	15	9	0	4	5	Inactive	Inactive	0	0	-	-
higher RPS in liver	5	61092018	ENSSSCG00000000629	TP23	42.4403	0	0.000475836	42.4363	68	2	2	64	0	0	0	0	Inactive	Inactive	0.06	0.23	-	-
higher RPS in liver	5	61736614	ENSSSCG00000026217	KLRC1	4.38204	1.24805	3.19889e-05	3.135	4	0	1	3	1	0	0	1	Inactive	Inactive	4.78	0.38	4.33165	5.8237e-07
higher RPS in liver	5	61788561	ENSSSCG00000032431	TMEM52B	6.49879	2.97744	2.01347e-06	3.52125	5	1	1	3	2	0	0	2	Inactive	Inactive	163.05	0.78	8.12031	5.51579e-83
higher RPS in liver	5	61832944	ENSSSCG00000000648	CLEC7A	4.63425	1.46432	4.62658e-09	3.16875	3	0	1	2	1	0	0	1	Inactive	Inactive	3.81	2.17	1.04367	0.00418372
higher RPS in liver	5	61896760	ENSSSCG00000000650	CLEC1B	13.6647	0	4.42994e-11	13.66	9	5	1	3	0	0	0	0	Inactive	Inactive	22.74	0.2	7.89285	2.37947e-07
higher RPS in liver	5	62226133	ENSSSCG00000000657	Unknown	9.62104	0	3.22383e-08	9.61625	7	1	3	3	0	0	0	0	Active	Inactive	359.08	124.99	1.63618	3.35805e-05
higher RPS in liver	5	62244855	ENSSSCG00000039708	KLRB1	13.5899	0.800264	2.81161e-07	12.7863	10	1	5	4	1	0	0	1	Inactive	Inactive	18.33	0.22	7.5264	3.21262e-12
higher RPS in liver	5	62276897	ENSSSCG00000000659	Unknown	6.75772	0	1.36295e-09	6.75375	5	0	2	3	0	0	0	0	Inactive	Inactive	0.83	0.35	1.60843	0.00362466
higher RPS in liver	5	62742315	ENSSSCG00000031712	MFAP5	15.2639	8.3988	3.6908e-07	6.8675	11	0	3	8	6	0	0	6	Inactive	Active	4.84	705.78	-6.77354	2.02552e-13
higher RPS in liver	5	62913591	ENSSSCG00000047604	Unknown	4.97731	0	1.40326e-07	4.9725	4	0	2	2	0	0	0	0	Inactive	Inactive	11.74	9.53	0.229657	0.485949
higher RPS in liver	5	63041740	ENSSSCG00000022925	Unknown	15.1113	3.82049	3.74472e-10	11.2925	11	0	0	11	3	0	0	3	Active	Active	26.76	16.43	0.921514	0.0020661
higher RPS in liver	5	63122325	ENSSSCG00000025179	NECAP1	5.99875	2.94844	1.57137e-05	3.05	6	0	0	6	2	0	0	2	Active	Active	54.88	52.19	0.158892	0.421446
higher RPS in liver	5	63514566	ENSSSCG00000034914	Unknown	10.5027	7.29761	0.00633176	3.205	10	0	0	10	8	0	0	8	Inactive	Inactive	0.09	0	-	-
higher RPS in liver	5	63610618	ENSSSCG00000000672	CLSTN3	10.607	0	1.09571e-10	10.6013	8	0	0	8	0	0	0	0	Inactive	Active	3.27	4.02	-0.131915	0.699762
higher RPS in liver	5	63751469	ENSSSCG00000026812	EMG1	10.3842	1.33109	5.90274e-12	9.05625	7	0	2	5	1	0	0	1	Active	Active	107.26	159.56	-0.474009	0.0418919
higher RPS in liver	5	63751558	ENSSSCG00000024655	PHB2	10.3842	1.33109	5.90274e-12	9.05625	7	0	2	5	1	0	0	1	Active	Active	538.62	371.9	0.60368	0.0188765
higher RPS in liver	5	63781308	ENSSSCG00000040186	C12ORF57	15.7597	9.47965	7.16497e-08	6.28	10	0	2	8	6	0	0	6	Active	Active	204.03	69.66	1.63589	4.03378e-10
higher RPS in liver	5	63795648	ENSSSCG00000025117	ATN1	6.22496	0.868718	4.61414e-08	5.35625	5	0	2	3	1	0	0	1	Active	Active	2.35	9.56	-1.87391	9.25902e-07
higher RPS in liver	5	63836688	ENSSSCG00000028373	ENO2	8.34435	1.30243	6.0922e-09	7.0425	6	0	2	4	1	0	0	1	Active	Active	2.59	1.46	0.730747	0.00124384
higher RPS in liver	5	63817225	ENSSSCG00000000679	LRRC23	3.79969	0	4.19326e-09	3.795	3	0	0	3	0	0	0	0	Active	Active	3.88	0.32	3.82208	2.91336e-07
higher RPS in liver	5	63836766	ENSSSCG00000025460	SPSB2	8.34435	1.30243	6.0922e-09	7.0425	6	0	2	4	1	0	0	1	Active	Active	38.1	5.65	2.76488	7.22184e-18
higher RPS in liver	5	63843137	ENSSSCG00000000685	TPI1	9.72803	4.0713	9.78587e-10	5.655	7	0	2	5	3	0	0	3	Active	Active	403.19	5512.7	-3.91913	9.98428e-56
higher RPS in liver	5	63977377	ENSSSCG00000000691	COPS7A	4.16633	0	2.86565e-09	4.16	3	0	0	3	0	0	0	0	Active	Active	153.6	92.47	0.589477	0.00425779
higher RPS in liver	5	68223662	ENSSSCG00000000754	RAD52	8.45467	1.39544	1.62053e-09	7.06	6	0	2	4	1	0	0	1	Active	Active	11.33	19.18	-0.637622	0.00141033
higher RPS in liver	5	68223389	ENSSSCG00000000755	ERC1	8.45467	1.39544	1.62053e-09	7.06	6	0	2	4	1	0	0	1	Active	Active	70.59	27.65	1.46814	1.80697e-15
higher RPS in liver	5	68822647	ENSSSCG00000000760	LRTM2	6.78492	2.65459	1.96942e-06	4.1275	5	0	0	5	2	0	0	2	Active	Active	0.04	0.03	-	-
higher RPS in liver	5	77127650	ENSSSCG00000000808	SLC38A2	26.6236	15.867	2.92396e-06	10.7587	20	20	0	0	11	1	2	8	Active	Active	604.2	383.36	0.667645	0.00216993
higher RPS in liver	5	77645754	ENSSSCG00000000810	AMIGO2	19.6215	10.419	4.61342e-05	9.20375	16	0	3	13	8	0	5	3	Active	Active	8.4	6.17	0.584048	0.17299
higher RPS in liver	5	77645175	ENSSSCG00000000811	PCED1B	19.6215	10.419	4.61342e-05	9.20375	16	0	3	13	8	0	5	3	Active	Active	2.97	2.19	0.336499	0.448008
higher RPS in liver	5	80288075	ENSSSCG00000000843	TXNRD1	20.1449	11.7183	3.67561e-08	8.42625	13	0	2	11	8	0	3	5	Active	Active	116.77	138.07	-0.198007	0.323388
higher RPS in liver	5	81775970	ENSSSCG00000000857	IGF1	18.7536	1.34505	1.00981e-10	17.4088	14	8	2	4	1	0	0	1	Active	Active	35.62	72.1	-0.524933	0.215899
higher RPS in liver	5	83684604	ENSSSCG00000000875	NR1H4	13.5072	0	5.28023e-09	13.5025	10	5	4	1	0	0	0	0	Inactive	Inactive	213.25	0.18	10.3507	6.00869e-182
higher RPS in liver	5	83800809	ENSSSCG00000038946	SLC17A8	16.8802	2.62507	1.11004e-11	14.2562	12	0	6	6	2	0	0	2	Inactive	Inactive	6.74	0.06	7.68585	5.36209e-27
higher RPS in liver	5	87354196	ENSSSCG00000023803	ELK3	10.8364	2.41277	4.16394e-09	8.425	8	0	7	1	2	0	0	2	Active	Active	13.4	17.87	-0.24295	0.214656
higher RPS in liver	5	87522522	ENSSSCG00000000892	HAL	17.8303	7.07384	1.58052e-10	10.7562	11	0	0	11	5	0	0	5	Active	Inactive	183.41	0.79	7.77961	2.96537e-55
higher RPS in liver	5	87569305	ENSSSCG00000000893	AMDHD1	4.99006	0	4.95188e-11	4.985	3	0	0	3	0	0	0	0	Active	Active	308.33	0.91	8.40582	7.56512e-67
higher RPS in liver	5	87568989	ENSSSCG00000000894	CCDC38	4.99006	0	4.95188e-11	4.985	3	0	0	3	0	0	0	0	Active	Active	17.4	0.07	8.53707	2.30536e-47
higher RPS in liver	5	87636481	ENSSSCG00000000895	SNRPF	14.0238	5.33217	1.027e-09	8.6925	10	0	4	6	4	0	2	2	Inactive	Inactive	180.36	119.54	0.806358	0.00579878
higher RPS in liver	5	87671873	ENSSSCG00000000896	NTN4	8.65471	3.28539	8.01895e-06	5.36875	7	0	4	3	3	0	2	1	Active	Active	7.47	16.74	-1.07833	0.000529242
higher RPS in liver	5	88104742	ENSSSCG00000000900	VEZT	18.0944	11.6829	1.84448e-07	6.4125	12	0	7	5	8	0	7	1	Active	Active	42.05	52.72	-0.193737	0.214303
higher RPS in liver	5	88104234	ENSSSCG00000000901	FGD6	18.0944	11.6829	1.84448e-07	6.4125	12	0	7	5	8	0	7	1	Active	Active	25.19	4.92	2.33519	2.04478e-15
higher RPS in liver	5	88518295	ENSSSCG00000000906	TMCC3	5.29964	0	2.36856e-06	5.29375	5	0	2	3	0	0	0	0	Inactive	Inactive	12.93	4.99	1.40476	1.46246e-16
higher RPS in liver	5	89673573	ENSSSCG00000000908	Unknown	4.63776	0	3.69312e-06	4.63125	4	1	0	3	0	0	0	0	Active	Active	273.05	234.72	0.345324	0.119529
higher RPS in liver	5	89693474	ENSSSCG00000046002	Unknown	10.6981	6.27507	1.01764e-05	4.4225	8	4	0	4	5	0	2	3	Inactive	Inactive	0.9	1.1	-0.178697	0.614313
higher RPS in liver	5	90815201	ENSSSCG00000035790	BTG1	6.48852	2.84101	6.64606e-07	3.645	5	2	1	2	2	0	0	2	Active	Active	58.97	64.94	-0.109293	0.724239
higher RPS in liver	5	93132017	ENSSSCG00000000920	POC1B	12.6033	6.79155	2.56313e-07	5.8125	9	0	2	7	5	0	2	3	Active	Active	26.12	12.99	0.979761	3.04657e-06
higher RPS in liver	5	93132135	ENSSSCG00000043102	GALNT4	12.6033	6.79155	2.56313e-07	5.8125	9	0	2	7	5	0	2	3	Active	Active	6.45	9.41	-0.549637	0.00293957
higher RPS in liver	5	93302975	ENSSSCG00000037910	DUSP6	10.2663	2.6699	1.25224e-07	7.595	8	1	2	5	2	0	1	1	Active	Active	110.58	30.71	1.62013	1.17716e-07
higher RPS in liver	5	95000780	ENSSSCG00000045431	Unknown	7.34942	2.59171	0.000592601	4.755	11	0	0	11	3	0	0	3	Inactive	Inactive	0.24	0.3	-	-
higher RPS in liver	5	96272824	ENSSSCG00000000932	NTS	21.6548	7.65145	2.62963e-08	14.0025	17	0	3	14	5	0	0	5	Inactive	Inactive	0.12	0.05	-	-
higher RPS in liver	5	96297661	ENSSSCG00000034948	RASSF9	8.10214	0	3.41445e-06	8.0975	7	2	0	5	0	0	0	0	Active	Active	18.8	8.34	1.57595	1.78741e-05
higher RPS in liver	5	100429204	ENSSSCG00000000939	ACSS3	12.0522	1.46285	8.08271e-09	10.59	9	0	4	5	1	0	1	0	Active	Active	207.18	26.79	2.90018	1.88658e-22
higher RPS in liver	5	100429515	ENSSSCG00000046153	Unknown	12.0522	1.46285	8.08271e-09	10.59	9	0	4	5	1	0	1	0	Active	Active	1.55	1.43	0.240134	0.240262
higher RPS in liver	5	101692143	ENSSSCG00000036560	PAWR	14.0097	0	2.76021e-10	14.0062	10	0	6	4	0	0	0	0	Active	Active	73.62	4.51	4.05756	6.55818e-47
higher RPS in liver	16	4271171	ENSSSCG00000016784	ANKH	16.2083	1.21161	8.60343e-10	14.995	11	6	0	5	1	0	1	0	Active	Active	43.45	9.5	2.25682	7.31859e-29
higher RPS in liver	16	6384350	ENSSSCG00000039222	BASP1	23.2529	14.6218	1.08548e-07	8.635	16	0	4	12	9	0	2	7	Active	Active	121.59	3.81	5.03651	1.22333e-62
higher RPS in liver	16	6571663	ENSSSCG00000037444	Unknown	6.39694	1.21768	9.20774e-08	5.18	5	0	3	2	1	0	0	1	Inactive	Inactive	0.19	0.12	-	-
[truncated: 2,712 more rows]

## Sheet: Sheet 3 (liver vs. brain)
Genes with differential RPS between liver and brain	Chromosome	TSS position	Gene Ensmbl ID	Gene symbol	Mean RPS in liver	Mean RPS in brain	P-value of RPS	ΔRPS (liver – brain)	Enhancer number of gene in liver				Enhancer number of gene in brain				Promoter type in liver	Promoter type in brain	Mean TPM in liver	Mean TPM in brain	log2FC of expression (liver / brain)	P-value of expression
									All	High activity	Moderate activity	Low activity	All	High activity	Moderate activity	Low activity
Higher RPS in liver	1	186749	ENSSSCG00000029697	FAM120B	31.1567	21.4117	5.83842e-08	9.74375	23	6	4	13	14	0	3	11	Active	Active	29.54	61.9	-1.12685	4.50918e-11
Higher RPS in liver	1	482720	ENSSSCG00000047845	Unknown	24.7387	10.9869	5.44877e-06	13.7513	23	0	4	19	9	3	2	4	Inactive	Inactive	0.43	0.92	-0.915643	0.0504145
Higher RPS in liver	1	540898	ENSSSCG00000004010	ERMARD	12.9485	8.80422	2.9025e-06	4.145	10	0	1	9	6	0	1	5	Active	Active	23.5	19.06	0.281811	0.102742
Higher RPS in liver	1	541028	ENSSSCG00000004009	TCTE3	12.9485	8.80422	2.9025e-06	4.145	10	0	1	9	6	0	1	5	Active	Active	2.49	0.77	1.67511	0.0161995
Higher RPS in liver	1	1509504	ENSSSCG00000004017	FRMD1	21.367	9.5573	0.000407416	11.81	26	0	2	24	9	3	1	5	Active	Inactive	18.53	3.41	2.26236	1.23488e-07
Higher RPS in liver	1	2962633	ENSSSCG00000051306	Unknown	3.18373	0	0.000127843	3.17875	3	1	1	1	0	0	0	0	Inactive	Inactive	1.62	4.15	-1.19666	8.06098e-05
Higher RPS in liver	1	7365520	ENSSSCG00000004041	SLC22A1	5.97104	0	1.28647e-07	5.96875	5	0	2	3	0	0	0	0	Active	Inactive	227.72	0.04	13.0561	1.46488e-48
Higher RPS in liver	1	7472548	ENSSSCG00000004044	IGF2R	10.3863	4.53459	0.000146158	5.8525	7	0	5	2	3	3	0	0	Active	Active	25.51	12.27	1.04899	7.25136e-05
Higher RPS in liver	1	8546530	ENSSSCG00000004057	SYTL3	4.70363	1.3395	1.10412e-06	3.365	4	0	0	4	1	0	0	1	Inactive	Inactive	4.1	0.12	5.00054	2.80457e-28
Higher RPS in liver	1	9278703	ENSSSCG00000048243	Unknown	8.34039	1.53937	6.18023e-08	6.8	6	0	6	0	1	0	1	0	Inactive	Inactive	1.13	2.07	-0.699075	0.147641
Higher RPS in liver	1	9619727	ENSSSCG00000035027	ZDHHC14	16.84	9.98558	9.86193e-09	6.85375	13	1	3	9	7	2	3	2	Active	Active	14.08	44.98	-1.68787	9.12447e-29
Higher RPS in liver	1	9620679	ENSSSCG00000038527	Unknown	27.6007	7.14555	3.61329e-10	20.4563	21	0	6	15	5	0	4	1	Active	Active	1.85	2.78	-0.628138	0.0196529
Higher RPS in liver	1	9667291	ENSSSCG00000004063	TMEM242	44.332	33.5931	3.74154e-07	10.7413	31	1	7	23	22	0	17	5	Active	Active	73.4	11.91	2.52579	2.68611e-28
Higher RPS in liver	1	12122348	ENSSSCG00000004070	SCAF8	11.7332	8.29382	2.21652e-06	3.44	8	0	4	4	5	0	1	4	Active	Active	46.62	51.75	-0.138028	0.182936
Higher RPS in liver	1	16465252	ENSSSCG00000004109	ZC3H12D	3.48644	0	2.39319e-07	3.48	3	0	1	2	0	0	0	0	Active	Active	2.61	0.53	2.41582	2.75146e-09
Higher RPS in liver	1	18290022	ENSSSCG00000048240	SAMD5	33.2383	17.7602	3.90119e-10	15.4763	24	0	1	23	11	5	1	5	Active	Active	11.63	10.2	0.375039	0.11031
Higher RPS in liver	1	19097892	ENSSSCG00000004114	RAB32	24.6303	16.3316	7.59042e-06	8.29625	19	0	5	14	11	0	4	7	Active	Active	97.33	24.39	1.87687	1.11565e-17
Higher RPS in liver	1	22923839	ENSSSCG00000004140	VTA1	15.5663	11.3328	8.74611e-05	4.23125	11	0	2	9	7	0	1	6	Active	Active	131.58	110.97	0.185672	0.344505
Higher RPS in liver	1	22935121	ENSSSCG00000034307	GJE1	9.49269	1.42868	8.59097e-08	8.06125	7	0	2	5	1	0	0	1	Inactive	Inactive	0	0.04	-	-
Higher RPS in liver	1	25155664	ENSSSCG00000004142	CITED2	41.6015	11.6463	5.72935e-12	29.955	31	0	14	17	8	0	6	2	Active	Active	39.52	47.23	-0.362561	0.180014
Higher RPS in liver	1	25736370	ENSSSCG00000004149	NHSL1	15.757	7.81871	7.42559e-09	7.9375	11	7	0	4	5	5	0	0	Active	Active	8.27	8.58	0.057827	0.856754
Higher RPS in liver	1	27872184	ENSSSCG00000004163	BCLAF1	5.39572	1.43093	4.67151e-06	3.96375	5	0	2	3	1	0	0	1	Active	Active	189.6	135.31	0.514842	0.0042562
Higher RPS in liver	1	28857000	ENSSSCG00000004167	MYB	8.94309	0	3.20707e-09	8.9375	7	0	1	6	0	0	0	0	Active	Active	10.66	1.96	2.56778	9.32787e-14
Higher RPS in liver	1	33527734	ENSSSCG00000004205	ARHGAP18	8.13652	2.95024	5.1239e-08	5.1875	6	0	2	4	2	0	2	0	Active	Active	78.86	15.29	2.26081	8.64422e-24
Higher RPS in liver	1	34693367	ENSSSCG00000004209	PTPRK	7.44881	2.65237	3.63859e-07	4.7975	6	0	4	2	2	0	1	1	Active	Active	74.13	77.56	-0.158132	0.236532
Higher RPS in liver	1	44229539	ENSSSCG00000004252	Unknown	17.7241	13.324	1.59086e-06	4.4	13	0	0	13	9	0	2	7	Inactive	Inactive	0.68	1.28	-0.88098	0.0833498
Higher RPS in liver	1	44239383	ENSSSCG00000004253	GOPC	26.6952	21.2716	8.20897e-08	5.42375	18	0	3	15	13	0	2	11	Active	Active	52.53	28.15	0.849572	1.18533e-09
Higher RPS in liver	1	44409931	ENSSSCG00000026978	ROS1	13.3961	2.79309	3.3585e-09	10.605	10	0	2	8	2	0	0	2	Active	Inactive	2.88	0.05	5.89844	NA
Higher RPS in liver	1	44823516	ENSSSCG00000039333	RFX6	7.93549	0	1.56102e-08	7.93125	6	0	0	6	0	0	0	0	Active	Active	1.66	0.13	3.88675	1.16446e-10
Higher RPS in liver	1	50721676	ENSSSCG00000004276	SMAP1	10.7239	6.84084	1.96296e-06	3.8825	8	0	4	4	5	0	2	3	Active	Active	79.2	124.06	-0.719265	4.28176e-05
Higher RPS in liver	1	57061972	ENSSSCG00000004311	RNGTT	9.16841	4.43594	9.65901e-09	4.7325	7	0	2	5	3	0	1	2	Active	Active	39.45	18.75	1.02945	3.23589e-11
Higher RPS in liver	1	58775198	ENSSSCG00000040939	Unknown	15.2301	1.41554	7.60005e-05	13.8138	27	0	1	26	2	0	0	2	Inactive	Inactive	6.38	6.89	0.169461	0.693611
Higher RPS in liver	1	71166786	ENSSSCG00000037612	LIN28B	8.27518	1.6346	1.61799e-08	6.6425	6	0	0	6	2	0	1	1	Inactive	Inactive	14.81	0.68	4.49461	9.41596e-30
Higher RPS in liver	1	73968699	ENSSSCG00000033392	SCML4	6.24827	2.76447	4.31169e-06	3.4825	5	0	0	5	2	0	0	2	Active	Active	23.09	9.17	1.36846	2.21984e-06
Higher RPS in liver	1	74628217	ENSSSCG00000004387	FOXO3B	82.3353	56.794	1.09709e-09	25.54	55	15	19	21	38	9	20	9	Active	Active	30.37	30.56	-0.157774	0.434416
Higher RPS in liver	1	75169987	ENSSSCG00000004390	SESN1	3.68652	0.418065	4.06194e-05	3.265	3	0	0	3	1	0	1	0	Active	Active	60.53	39.41	0.535986	0.0327813
Higher RPS in liver	1	75458145	ENSSSCG00000004414	CD164	34.017	13.346	4.18089e-07	20.67	25	3	7	15	10	0	0	10	Active	Active	443.27	62.24	2.74421	1.59427e-47
Higher RPS in liver	1	75548785	ENSSSCG00000004411	ZBTB24	4.16118	1.10984	0.00592266	3.05125	6	0	0	6	2	0	0	2	Active	Active	6.49	6.41	0.160055	0.409429
Higher RPS in liver	1	75693354	ENSSSCG00000033739	AK9	5.4391	2.21501	0.000341746	3.2225	7	0	0	7	2	0	1	1	Active	Active	0.44	1.05	-1.49616	0.000708171
Higher RPS in liver	1	75692932	ENSSSCG00000004405	FIG4	5.4391	2.21501	0.000341746	3.2225	7	0	0	7	2	0	1	1	Inactive	Inactive	25.16	33.32	-0.442439	0.00901007
Higher RPS in liver	1	75740754	ENSSSCG00000049983	Unknown	7.8297	4.23615	0.00276497	3.59375	11	0	0	11	5	0	1	4	Inactive	Inactive	0.39	1.05	-1.43847	0.000153069
Higher RPS in liver	1	75979385	ENSSSCG00000004406	GPR6	31.9291	22.2411	0.00420815	9.68875	44	0	2	42	26	1	5	20	Inactive	Active	0	4.54	-9.40037	1.8249e-13
Higher RPS in liver	1	76357773	ENSSSCG00000049571	Unknown	13.8822	8.20884	0.0118274	5.67375	15	0	2	13	10	0	3	7	Inactive	Inactive	0.07	0.56	-2.70817	0.0859923
Higher RPS in liver	1	76467576	ENSSSCG00000004399	SLC22A16	6.22518	1.22856	0.000258653	4.99375	8	0	0	8	2	0	0	2	Active	Active	3.84	0.52	3.14115	1.94125e-07
Higher RPS in liver	1	76675741	ENSSSCG00000004396	Unknown	4.07419	0	6.2867e-06	4.07	4	0	0	4	0	0	0	0	Inactive	Inactive	0.27	0	-	-
Higher RPS in liver	1	76896083	ENSSSCG00000004393	GTF3C6	22.8715	15.6278	2.85504e-07	7.24375	16	8	2	6	10	0	6	4	Active	Active	37.15	33.4	0.23096	0.264779
Higher RPS in liver	1	76998359	ENSSSCG00000004419	SLC16A10	14.7682	4.28329	8.88961e-09	10.4863	11	0	6	5	3	0	3	0	Active	Active	39.65	5.15	2.62732	3.8693e-25
Higher RPS in liver	1	78005847	ENSSSCG00000004422	CCN6	4.52247	1.44306	1.06078e-09	3.0775	3	3	0	0	1	1	0	0	Active	Inactive	4.01	0.39	3.5116	3.17534e-14
Higher RPS in liver	1	82251321	ENSSSCG00000023415	SULT1A3	9.33167	1.59389	1.34445e-06	7.73625	6	4	0	2	1	0	0	1	Active	Inactive	2566.46	2.18	10.1616	2.84705e-206
Higher RPS in liver	1	84545201	ENSSSCG00000004464	TENT5A	14.0746	0	1.6483e-11	14.0687	10	0	6	4	0	0	0	0	Active	Active	93.2	5.12	4.2538	8.26287e-51
Higher RPS in liver	1	86516306	ENSSSCG00000004469	LCA5	8.64804	0	1.12602e-10	8.6425	6	0	2	4	0	0	0	0	Active	Inactive	1.05	10.19	-3.20795	7.36078e-11
Higher RPS in liver	1	87285792	ENSSSCG00000044875	Unknown	30.8029	19.0071	0.00691698	11.795	60	0	2	58	39	0	1	38	Inactive	Active	0.03	0.16	-	-
Higher RPS in liver	1	87287931	ENSSSCG00000044964	Unknown	30.8029	19.0071	0.00691698	11.795	60	0	2	58	39	0	1	38	Inactive	Active	0	6.8	-9.37655	1.96736e-06
Higher RPS in liver	1	93046903	ENSSSCG00000039396	Unknown	5.09446	1.94021	0.0373618	3.15375	7	0	0	7	3	0	0	3	Inactive	Inactive	0	0	-	-
Higher RPS in liver	1	99081938	ENSSSCG00000004509	LIPG	22.4593	1.59607	6.41851e-10	20.8637	15	11	0	4	1	0	0	1	Active	Active	71.65	0.97	6.26575	3.26861e-64
Higher RPS in liver	1	99269536	ENSSSCG00000043017	Unknown	15.8527	9.70608	4.22442e-07	6.1475	11	2	0	9	6	0	2	4	Inactive	Inactive	0.06	0.23	-	-
Higher RPS in liver	1	99747458	ENSSSCG00000045942	Unknown	3.13777	0	5.4334e-09	3.13125	2	0	0	2	0	0	0	0	Inactive	Inactive	2.65	4.95	-0.746501	0.0157613
Higher RPS in liver	1	99841641	ENSSSCG00000041158	Unknown	5.94043	0	2.40622e-09	5.93625	4	0	0	4	0	0	0	0	Inactive	Inactive	0.26	0.62	-1.33813	0.000359079
Higher RPS in liver	1	100967925	ENSSSCG00000041603	Unknown	12.2121	8.20737	0.0142789	4.00625	22	0	1	21	15	0	2	13	Inactive	Inactive	3.35	1.63	1.20273	0.467363
Higher RPS in liver	1	104241571	ENSSSCG00000035243	RAB27B	10.4514	1.39933	9.225e-09	9.0525	9	0	2	7	1	0	0	1	Inactive	Active	70.99	22.08	1.76321	1.59069e-08
Higher RPS in liver	1	104474489	ENSSSCG00000004534	CCDC68	17.2427	0	2.67081e-11	17.2375	13	1	2	10	0	0	0	0	Active	Active	9.38	1.02	3.22262	1.29974e-12
Higher RPS in liver	1	106751173	ENSSSCG00000004540	ONECUT2	6.07713	2.69349	1.23264e-05	3.3825	5	0	3	2	2	0	1	1	Active	Active	6.28	2.13	1.73777	0.000854123
Higher RPS in liver	1	107655214	ENSSSCG00000004552	TRIP4	9.40491	3.19281	3.75898e-09	6.21375	7	0	3	4	2	0	1	1	Active	Active	35.53	15.44	1.21016	2.44729e-12
Higher RPS in liver	1	107659501	ENSSSCG00000004554	PCLAF	9.40491	3.19281	3.75898e-09	6.21375	7	0	3	4	2	0	1	1	Active	Active	898.69	6.77	7.01374	6.08443e-13
Higher RPS in liver	1	107997293	ENSSSCG00000021588	DAPK2	21.0665	3.90402	1.61073e-07	17.165	17	0	8	9	3	0	3	0	Active	Active	11.02	4.17	1.42939	3.81459e-06
Higher RPS in liver	1	109019440	ENSSSCG00000004570	TPM1	18.2066	11.493	4.82362e-08	6.71375	14	0	9	5	8	4	4	0	Inactive	Inactive	201.12	178.24	0.24075	0.190746
Higher RPS in liver	1	109923168	ENSSSCG00000004573	Unknown	13.6199	7.07226	4.31758e-09	6.5475	10	0	2	8	5	0	0	5	Active	Active	16.25	1.29	3.76049	2.85371e-27
Higher RPS in liver	1	112540983	ENSSSCG00000004584	GCNT3	16.7898	9.99023	1.04014e-06	6.7975	11	0	6	5	6	0	1	5	Inactive	Inactive	2.21	0.53	2.25594	1.42503e-06
Higher RPS in liver	1	113059543	ENSSSCG00000004589	RNF111	10.0189	0	7.75389e-09	10.0137	8	0	6	2	0	0	0	0	Active	Active	28.94	30.74	-0.127293	0.281021
Higher RPS in liver	1	113715620	ENSSSCG00000025578	ALDH1A2	13.1178	0	8.25263e-08	13.1137	12	0	6	6	0	0	0	0	Inactive	Inactive	5.69	2.21	1.06278	0.0573279
Higher RPS in liver	1	113848685	ENSSSCG00000004597	AQP9	6.52148	0	3.97579e-09	6.51625	4	4	0	0	0	0	0	0	Active	Inactive	772.44	1.15	9.22133	4.7984e-88
Higher RPS in liver	1	114598823	ENSSSCG00000035038	CGNL1	28.2337	12.9915	7.05865e-09	15.2413	20	7	5	8	9	0	9	0	Active	Active	63.69	14.63	2.09849	1.05784e-31
Higher RPS in liver	1	118913785	ENSSSCG00000004616	ONECUT1	7.24781	0	2.9356e-07	7.24375	6	1	0	5	0	0	0	0	Active	Active	52.78	0.59	6.65979	7.46952e-99
Higher RPS in liver	1	119484397	ENSSSCG00000004622	GNB5	5.72038	0	7.00254e-10	5.715	4	1	1	2	0	0	0	0	Inactive	Inactive	14.43	128.92	-3.00449	1.4397e-38
Higher RPS in liver	1	121716765	ENSSSCG00000045182	Unknown	34.1805	20.147	0.000505547	14.0325	62	1	6	55	34	0	2	32	Inactive	Inactive	0.47	3.07	-2.23944	2.60962e-05
Higher RPS in liver	1	123102009	ENSSSCG00000004658	FBN1	8.7635	2.7065	1.23507e-07	6.05875	7	0	4	3	2	0	1	1	Active	Active	43.71	17.06	1.39322	6.76751e-07
Higher RPS in liver	1	125794655	ENSSSCG00000044345	Unknown	8.22774	0.37428	0.000190398	7.84875	11	0	0	11	1	0	1	0	Inactive	Inactive	0.23	0.52	-1.08054	0.355908
Higher RPS in liver	1	126137062	ENSSSCG00000004666	SQOR	3.59035	0	3.7083e-09	3.5875	3	0	0	3	0	0	0	0	Active	Active	189.33	35.47	2.38039	2.55578e-24
Higher RPS in liver	1	126310749	ENSSSCG00000004670	C15orf48	7.17511	2.85375	1.71403e-05	4.32125	6	0	0	6	2	0	0	2	Inactive	Inactive	4.28	3.31	0.539723	0.0754989
Higher RPS in liver	1	126652463	ENSSSCG00000004676	DUOXA2	6.61689	0	9.021e-10	6.61125	5	3	0	2	0	0	0	0	Inactive	Inactive	3	1.61	1.26359	NA
Higher RPS in liver	1	126768708	ENSSSCG00000004680	TERB2	6.31533	0	3.60809e-08	6.31125	5	0	0	5	0	0	0	0	Inactive	Inactive	7.57	0.27	4.85341	1.19207e-15
Higher RPS in liver	1	126816846	ENSSSCG00000004681	TRIM69	15.9592	10.957	9.31922e-08	5.00375	10	0	0	10	7	0	0	7	Inactive	Inactive	0.07	0.01	-	-
Higher RPS in liver	1	128888947	ENSSSCG00000038735	SNAP23	6.31739	1.41634	4.63907e-05	4.9025	5	0	0	5	1	0	0	1	Active	Active	223.55	24.7	3.14631	6.033e-27
Higher RPS in liver	1	129013547	ENSSSCG00000004728	CAPN3	3.74681	0	3.45526e-09	3.74125	3	0	0	3	0	0	0	0	Inactive	Active	2.8	4.51	-0.561813	0.0327004
Higher RPS in liver	1	129098302	ENSSSCG00000004729	AC012651.1	8.35698	3.01381	4.27806e-09	5.34125	6	0	3	3	2	0	2	0	Active	Active	21.74	16.57	0.185325	0.271363
Higher RPS in liver	1	129098388	ENSSSCG00000004730	TMEM87A	8.35698	3.01381	4.27806e-09	5.34125	6	0	3	3	2	0	2	0	Active	Active	121.99	45.03	1.47282	2.97902e-11
Higher RPS in liver	1	129144344	ENSSSCG00000004731	VPS39	10.4544	2.72764	5.20845e-09	7.72625	8	0	1	7	2	0	2	0	Active	Active	21.13	40.27	-0.914172	7.92789e-11
Higher RPS in liver	1	129201069	ENSSSCG00000004732	PLA2G4F	11.3378	0	8.41597e-10	11.33	9	0	2	7	0	0	0	0	Inactive	Inactive	0.12	0.1	-	-
Higher RPS in liver	1	130563562	ENSSSCG00000032022	GCHFR	10.7483	6.34406	3.264e-06	4.405	8	0	0	8	4	0	0	4	Active	Active	31.65	2.81	3.24134	2.13528e-33
Higher RPS in liver	1	130563488	ENSSSCG00000043412	Unknown	10.7483	6.34406	3.264e-06	4.405	8	0	0	8	4	0	0	4	Active	Active	0	0	-	-
Higher RPS in liver	1	130753186	ENSSSCG00000038033	CCDC32	10.6751	1.2788	1.17609e-10	9.3975	8	0	2	6	1	0	1	0	Active	Active	44.22	43.6	0.0472087	0.814035
Higher RPS in liver	1	130878321	ENSSSCG00000004772	BAHD1	10.245	5.03705	6.20882e-06	5.20625	8	0	2	6	4	0	0	4	Active	Active	8.99	12.98	-0.592904	0.00622746
Higher RPS in liver	1	131510455	ENSSSCG00000040418	FSIP1	9.12047	5.51703	8.30498e-05	3.60125	8	0	0	8	4	0	3	1	Active	Active	1.05	8.87	-3.05087	3.29012e-27
Higher RPS in liver	1	133155170	ENSSSCG00000043630	Unknown	7.68332	3.62729	0.000610564	4.055	9	0	3	6	4	0	3	1	Inactive	Inactive	0.42	2.11	-2.25691	2.32732e-11
Higher RPS in liver	1	134013820	ENSSSCG00000004795	MEIS2	19.8992	16.295	1.03887e-06	3.605	14	0	1	13	10	0	1	9	Active	Active	11.43	64.39	-2.41369	5.47647e-22
Higher RPS in liver	1	134525831	ENSSSCG00000042387	Unknown	10.7304	1.10737	7.09998e-05	9.61875	22	0	1	21	2	0	0	2	Inactive	Active	0.12	0.17	-	-
Higher RPS in liver	1	143867853	ENSSSCG00000004844	MTMR10	9.49843	1.52528	3.07689e-10	7.97375	7	0	4	3	1	0	1	0	Active	Active	56.88	33.43	0.669203	0.000683507
Higher RPS in liver	1	145508636	ENSSSCG00000005785	PCSK6	5.96249	0	7.54094e-08	5.95625	5	4	1	0	0	0	0	0	Active	Active	112.63	10.05	3.40495	1.50666e-29
Higher RPS in liver	1	146017701	ENSSSCG00000004856	NFATC1	33.4058	26.071	1.16241e-07	7.335	22	0	3	19	16	0	9	7	Inactive	Inactive	2.48	1.59	0.471498	0.148634
Higher RPS in liver	1	147568673	ENSSSCG00000038767	MBP	12.9152	1.48443	1.2967e-09	11.4325	9	0	4	5	1	0	0	1	Active	Active	47.15	2099.32	-5.5001	7.55974e-71
Higher RPS in liver	1	149562528	ENSSSCG00000004869	CNDP1	5.40658	0	7.84678e-08	5.40125	4	0	0	4	0	0	0	0	Inactive	Inactive	0.37	1.9	-2.28614	0.00549193
Higher RPS in liver	1	149584292	ENSSSCG00000004870	CNDP2	21.2569	3.37178	1.47193e-07	17.885	16	9	1	6	2	0	1	1	Active	Active	382.01	64.45	2.51739	5.68025e-36
Higher RPS in liver	1	149737571	ENSSSCG00000004875	CYB5A	15.7882	0	4.30826e-10	15.7837	11	10	0	1	0	0	0	0	Active	Active	4572.87	75.83	5.86269	6.21364e-140
Higher RPS in liver	1	150433327	ENSSSCG00000041473	Unknown	13.9113	1.53517	0.00016367	12.3737	23	0	0	23	3	0	1	2	Inactive	Inactive	0.82	1.45	-0.510127	0.553019
Higher RPS in liver	1	157937594	ENSSSCG00000034000	Unknown	5.38439	0	1.9057e-08	5.38	4	0	0	4	0	0	0	0	Inactive	Inactive	0.96	0.54	0.921465	0.028665
Higher RPS in liver	1	157998842	ENSSSCG00000004891	SERPINB7	11.7471	1.05234	1.5606e-08	10.6925	9	0	2	7	1	0	0	1	Active	Inactive	62.02	4.44	3.91475	8.17679e-06
Higher RPS in liver	1	158012306	ENSSSCG00000049954	Unknown	9.28045	0	9.58547e-08	9.275	7	0	0	7	0	0	0	0	Inactive	Inactive	53.89	21.82	1.60029	0.00273638
Higher RPS in liver	1	158233051	ENSSSCG00000004893	VPS4B	5.14855	0	3.51278e-10	5.145	4	0	0	4	0	0	0	0	Active	Active	143.42	58.66	1.31733	5.40233e-09
Higher RPS in liver	1	158288544	ENSSSCG00000025744	KDSR	4.15598	0	2.92287e-11	4.1525	3	0	0	3	0	0	0	0	Active	Active	41.23	34.52	0.199634	0.349436
Higher RPS in liver	1	158862706	ENSSSCG00000004896	PHLPP1	30.6523	25.4758	3.15278e-08	5.17625	22	7	7	8	16	16	0	0	Active	Active	9.11	49.03	-2.47209	1.51106e-52
Higher RPS in liver	1	159022072	ENSSSCG00000004897	ZCCHC2	3.97532	0	1.90174e-08	3.97	3	1	0	2	0	0	0	0	Active	Active	22.85	20.13	0.230266	0.159863
Higher RPS in liver	1	162933131	ENSSSCG00000004921	ATP8B1	5.30532	0	2.64305e-07	5.29875	4	0	2	2	0	0	0	0	Inactive	Inactive	62.03	2.36	4.83584	6.74468e-105
Higher RPS in liver	1	163630366	ENSSSCG00000004937	SLC24A1	12.6499	1.22776	4.6606e-10	11.4213	9	0	4	5	1	0	1	0	Inactive	Inactive	1.67	0.74	1.23406	0.000177081
Higher RPS in liver	1	163790196	ENSSSCG00000004938	DENND4A	14.3132	0	2.65269e-11	14.3087	11	0	6	5	0	0	0	0	Active	Active	56.58	51.09	0.074998	0.724436
Higher RPS in liver	1	164310448	ENSSSCG00000004941	DIS3L	5.14943	1.38281	6.10646e-09	3.76875	4	0	0	4	1	0	0	1	Active	Active	13.48	14.64	-0.103378	0.518978
Higher RPS in liver	1	164369225	ENSSSCG00000004942	TIPIN	9.73362	6.03589	2.89452e-07	3.7	7	0	1	6	4	2	0	2	Active	Active	15.55	13.68	0.239219	0.268826
Higher RPS in liver	1	164657086	ENSSSCG00000004948	SMAD6	19.1497	15.6751	0.000588436	3.4775	14	5	3	6	10	4	5	1	Active	Active	17.91	2.18	2.78395	2.19239e-22
Higher RPS in liver	1	164998083	ENSSSCG00000004952	SMAD3	15.6817	5.40507	1.86213e-07	10.275	12	4	0	8	4	3	1	0	Active	Active	11.83	20.81	-0.950881	2.158e-05
Higher RPS in liver	1	165753522	ENSSSCG00000004956	SKOR1	11.4891	5.40353	2.25643e-09	6.08625	9	0	2	7	4	0	1	3	Active	Active	0.03	0.05	-	-
Higher RPS in liver	1	165853126	ENSSSCG00000004958	PIAS1	10.8377	1.31508	9.52375e-09	9.52	9	0	1	8	1	0	0	1	Inactive	Inactive	47.2	76.65	-0.746604	0.000839226
Higher RPS in liver	1	166633289	ENSSSCG00000047355	Unknown	7.80488	0	3.56747e-07	7.79875	7	0	0	7	0	0	0	0	Inactive	Inactive	0.73	1.49	-0.747027	0.444623
Higher RPS in liver	1	167154627	ENSSSCG00000004968	PAQR5	9.91385	1.3621	1.41412e-07	8.55125	8	0	2	6	1	0	1	0	Active	Active	10.71	3.41	1.73778	2.56811e-09
Higher RPS in liver	1	168800525	ENSSSCG00000045715	Unknown	19.2733	2.26177	1.07009e-06	17.0113	26	0	6	20	3	0	1	2	Inactive	Inactive	0	0.86	-7.53521	1.24716e-08
Higher RPS in liver	1	179697615	ENSSSCG00000005012	ARF6	45.2976	17.8719	2.01829e-10	27.4275	30	0	9	21	11	0	9	2	Active	Active	144.47	34.25	2.09228	1.65995e-29
Higher RPS in liver	1	179906967	ENSSSCG00000036735	VCPKMT	18.4369	14.2256	6.33819e-06	4.21125	13	0	1	12	9	0	0	9	Active	Active	49.35	19.87	1.35829	1.50025e-07
Higher RPS in liver	1	180299496	ENSSSCG00000036634	MAP4K5	26.483	13.9891	1.313e-08	12.495	19	0	15	4	9	0	6	3	Active	Active	31.07	37.63	-0.192902	0.33497
Higher RPS in liver	1	180299469	ENSSSCG00000005020	ATL1	26.483	13.9891	1.313e-08	12.495	19	0	15	4	9	0	6	3	Active	Active	1.75	131.82	-5.94105	2.31132e-33
Higher RPS in liver	1	181428919	ENSSSCG00000028092	GNG2	39.1178	22.4942	8.84082e-09	16.6225	27	0	13	14	14	0	6	8	Inactive	Inactive	26.98	186.83	-2.87218	2.7854e-22
Higher RPS in liver	1	182606869	ENSSSCG00000005041	FERMT2	23.3201	17.9404	1.23247e-05	5.37875	15	9	0	6	12	10	2	0	Inactive	Active	239.54	97.97	1.24546	3.33251e-09
Higher RPS in liver	1	184599599	ENSSSCG00000005057	FBXO34	13.7332	4.37849	8.60138e-09	9.35375	10	0	1	9	3	0	2	1	Active	Active	31.84	53.35	-0.816121	8.51458e-06
Higher RPS in liver	1	184881550	ENSSSCG00000005060	KTN1	12.5449	0	7.54895e-08	12.5412	10	2	4	4	0	0	0	0	Active	Active	347.38	85.1	2.0467	2.7505e-14
Higher RPS in liver	1	188582434	ENSSSCG00000032928	GPR135	9.00137	5.98065	0.000108099	3.02125	7	0	2	5	4	0	3	1	Active	Active	0.27	1.85	-3.00189	1.25336e-08
Higher RPS in liver	1	189170534	ENSSSCG00000005083	DHRS7	7.91878	1.47922	1.00815e-08	6.43875	6	0	0	6	1	0	0	1	Active	Active	46.62	20.97	1.17673	0.0233215
Higher RPS in liver	1	189170585	ENSSSCG00000005084	PPM1A	7.91878	1.47922	1.00815e-08	6.43875	6	0	0	6	1	0	0	1	Active	Active	114.05	78.38	0.457258	0.00777155
Higher RPS in liver	1	190677904	ENSSSCG00000005097	SNAPC1	8.46563	4.74218	1.59628e-06	3.72125	6	0	6	0	3	3	0	0	Active	Active	26.97	32.8	-0.273895	0.112599
Higher RPS in liver	1	191028346	ENSSSCG00000037043	Unknown	4.89313	1.34601	8.16059e-07	3.545	4	0	2	2	1	0	1	0	Inactive	Inactive	3.77	84.94	-4.75183	2.00286e-51
Higher RPS in liver	1	196129905	ENSSSCG00000005125	LRRC19	9.4072	0	9.16941e-10	9.4025	7	0	1	6	0	0	0	0	Inactive	Inactive	0.75	0.9	-0.194814	0.67652
Higher RPS in liver	1	200414334	ENSSSCG00000005131	DMRTA1	11.695	3.19437	7.91611e-09	8.50125	8	0	1	7	2	0	0	2	Active	Active	4.49	0.23	4.58196	2.88406e-15
Higher RPS in liver	1	200934639	ENSSSCG00000005135	MTAP	9.37792	2.65049	3.36073e-07	6.73	8	0	2	6	2	0	1	1	Active	Active	92.12	9.62	3.31303	9.99681e-69
Higher RPS in liver	1	200918079	ENSSSCG00000041931	Unknown	7.90079	1.48501	1.51944e-09	6.4175	6	0	1	5	1	0	1	0	Inactive	Inactive	1.32	1.74	-0.188726	0.634554
Higher RPS in liver	1	201246611	ENSSSCG00000031529	IFNW1	5.63847	2.08776	0.00224765	3.55125	6	0	0	6	2	0	0	2	Inactive	Inactive	0.03	0	-	-
Higher RPS in liver	1	201392587	ENSSSCG00000043301	IFN-ALPHA-8	14.4852	10.8125	0.0149661	3.6725	14	0	0	14	8	0	0	8	Inactive	Inactive	0.23	0.4	-	-
Higher RPS in liver	1	201615970	ENSSSCG00000044440	IFN-ALPHA-4	13.6846	7.88711	3.95309e-05	5.795	10	0	0	10	6	0	0	6	Inactive	Inactive	0	0	-	-
Higher RPS in liver	1	201623473	ENSSSCG00000033910	IFN-OMEGA-2	13.7444	6.11207	1.23707e-05	7.635	11	0	0	11	5	0	0	5	Inactive	Inactive	0	0	-	-
Higher RPS in liver	1	201654500	ENSSSCG00000005152	IFN-DELTA-1	21.5199	13.2485	1.63439e-06	8.2675	14	0	0	14	9	0	0	9	Inactive	Inactive	0.87	1.07	-0.175493	0.789117
Higher RPS in liver	1	201673749	ENSSSCG00000034940	IFN-DELTA-9	26.0525	16.0692	2.04756e-05	9.985	24	0	0	24	11	0	1	10	Active	Active	0	0	-	-
Higher RPS in liver	1	201677540	ENSSSCG00000031149	IFN-ALPHA-15	21.7915	13.1732	6.2796e-05	8.61625	20	0	1	19	9	0	1	8	Inactive	Inactive	0.34	0.23	-	-
Higher RPS in liver	1	201678376	ENSSSCG00000047475	IFNA1	21.7915	13.1732	6.2796e-05	8.61625	20	0	1	19	9	0	1	8	Inactive	Inactive	0.03	0	-	-
Higher RPS in liver	1	201736694	ENSSSCG00000050619	IFNA1	3.05984	0	0.00315412	3.055	4	0	0	4	0	0	0	0	Inactive	Inactive	0	0	-	-
Higher RPS in liver	1	202317453	ENSSSCG00000005166	MLLT3	21.3025	12.6781	1.07111e-08	8.62625	15	0	0	15	8	0	4	4	Active	Active	4.34	31.87	-2.8919	9.01773e-20
Higher RPS in liver	1	203683862	ENSSSCG00000035863	PLIN2	4.82791	0	1.72554e-10	4.82375	3	0	3	0	0	0	0	0	Active	Active	176.83	7.46	4.77677	1.11909e-74
Higher RPS in liver	1	208175194	ENSSSCG00000005190	NFIB	29.7766	13.2931	8.33702e-09	16.485	24	12	7	5	8	0	0	8	Active	Active	44.13	97.47	-0.983726	1.29279e-07
Higher RPS in liver	1	209668894	ENSSSCG00000036360	LURAP1L	6.5624	1.21054	1.99323e-07	5.35	5	0	2	3	1	0	0	1	Active	Active	25.63	2.49	3.50461	3.71937e-42
Higher RPS in liver	1	215842113	ENSSSCG00000021136	TPD52L3	10.0966	4.09497	8.38003e-08	6.00125	8	0	3	5	3	0	1	2	Inactive	Inactive	0.44	0	-	-
Higher RPS in liver	1	216792724	ENSSSCG00000005211	CD274	10.8594	5.12456	1.09955e-06	5.735	8	0	1	7	3	0	1	2	Active	Active	1.05	1.74	-0.570922	0.0727855
Higher RPS in liver	1	216792787	ENSSSCG00000005214	INSL6	10.8594	5.12456	1.09955e-06	5.735	8	0	1	7	3	0	1	2	Active	Active	1.14	2.45	-1.09723	0.000604626
Higher RPS in liver	1	217002148	ENSSSCG00000005215	JAK2	15.1973	7.89966	3.41805e-09	7.2975	11	4	0	7	5	0	2	3	Active	Active	48.07	23.75	1.11045	4.51364e-06
Higher RPS in liver	1	217204965	ENSSSCG00000005217	RCL1	14.2678	2.98079	1.53339e-09	11.2863	11	0	2	9	2	0	1	1	Active	Active	553.5	20.02	4.70812	3.37586e-166
Higher RPS in liver	1	218340446	ENSSSCG00000005225	RFX3	6.8447	0	3.59946e-06	6.83875	6	0	0	6	0	0	0	0	Active	Active	8.03	73.33	-3.1188	6.87791e-45
Higher RPS in liver	1	221491953	ENSSSCG00000005240	DOCK8	6.702	0	6.27435e-10	6.6975	5	0	2	3	0	0	0	0	Active	Active	26.26	10.41	1.4943	1.27972e-08
Higher RPS in liver	1	221521302	ENSSSCG00000005241	CBWD3	23.2523	4.22255	1.82834e-10	19.0275	16	0	11	5	3	0	0	3	Active	Active	105.57	15.85	2.85551	1.94006e-44
Higher RPS in liver	1	221973181	ENSSSCG00000044242	Unknown	8.10763	2.41238	6.54988e-05	5.69375	10	0	0	10	3	0	1	2	Inactive	Inactive	0.42	15.24	-5.20428	4.3067e-16
Higher RPS in liver	1	223748226	ENSSSCG00000021646	KLF9	23.653	18.5417	0.00013146	5.11125	17	4	4	9	12	7	3	2	Active	Active	125.31	102.08	0.211404	0.440606
Higher RPS in liver	1	226217312	ENSSSCG00000028996	ALDH1A1	4.72392	0	2.37784e-10	4.71875	3	3	0	0	0	0	0	0	Active	Inactive	7333.08	18.26	8.35095	1.5358e-59
Higher RPS in liver	1	226295226	ENSSSCG00000041232	Unknown	27.2217	10.1139	1.03889e-09	17.1088	19	0	1	18	7	0	5	2	Inactive	Inactive	1	3.34	-1.71714	1.44743e-06
Higher RPS in liver	1	227858464	ENSSSCG00000048925	Unknown	26.6295	9.53781	8.59138e-10	17.0925	19	0	2	17	6	0	0	6	Inactive	Inactive	0.65	3.95	-2.82031	1.52925e-16
Higher RPS in liver	1	229956229	ENSSSCG00000005279	FOXB2	5.0847	0	7.96679e-08	5.08	4	0	3	1	0	0	0	0	Active	Active	0.08	0.06	-	-
Higher RPS in liver	1	230546120	ENSSSCG00000005284	GNA14	5.26962	0	1.15597e-09	5.26375	4	0	0	4	0	0	0	0	Active	Active	26.74	2.7	3.30543	7.94794e-22
Higher RPS in liver	1	236587251	ENSSSCG00000005326	Unknown	6.66325	3.13442	6.16012e-06	3.53	5	0	0	5	2	0	2	0	Inactive	Inactive	0	0	-	-
Higher RPS in liver	1	238667617	ENSSSCG00000032554	SLC25A51	13.8746	10.8151	3.44151e-06	3.06125	10	0	3	7	7	0	7	0	Active	Active	71.98	63.82	0.1632	0.48885
Higher RPS in liver	1	239110018	ENSSSCG00000005361	ALDH1B1	17.9229	7.89306	5.28389e-09	10.0312	13	0	0	13	5	4	0	1	Active	Active	106.2	12.83	2.93274	1.33803e-34
Higher RPS in liver	1	239492886	ENSSSCG00000005367	TSTD2	6.38842	1.35059	3.65182e-09	5.04	5	2	0	3	1	0	0	1	Active	Active	65.44	29.34	1.11896	2.75174e-10
Higher RPS in liver	1	243027837	ENSSSCG00000042524	Unknown	15.5314	11.3586	5.19457e-07	4.17375	8	0	0	8	6	0	1	5	Inactive	Inactive	2.23	4.45	-0.856607	0.00206096
Higher RPS in liver	1	242995722	ENSSSCG00000038171	Unknown	8.003	3.55113	1.52725e-09	4.45125	5	0	2	3	2	0	0	2	Active	Inactive	239.99	0.49	9.11734	1.91484e-130
Higher RPS in liver	1	243039581	ENSSSCG00000005398	Unknown	15.9466	7.63807	3.3702e-09	8.30625	9	0	0	9	4	0	0	4	Active	Inactive	460.38	0.43	10.1591	4.57487e-174
Higher RPS in liver	1	243107460	ENSSSCG00000027974	MRPL50	9.05879	3.01373	8.66975e-06	6.04625	8	0	1	7	2	0	0	2	Active	Active	42.37	13.51	1.6226	1.7726e-12
Higher RPS in liver	1	243106972	ENSSSCG00000034239	ZNF189	9.05879	3.01373	8.66975e-06	6.04625	8	0	1	7	2	0	0	2	Active	Active	37.49	22.68	0.805723	4.03867e-06
Higher RPS in liver	1	243141418	ENSSSCG00000038300	ALDOB	10.9623	0	1.58417e-09	10.9575	8	0	1	7	0	0	0	0	Active	Inactive	9950.2	0.79	13.5491	3.48985e-113
Higher RPS in liver	1	243225924	ENSSSCG00000005399	RNF20	4.05026	0	8.17945e-10	4.04375	3	0	0	3	0	0	0	0	Active	Active	46.39	24.06	0.960618	1.1054e-12
Higher RPS in liver	1	249100395	ENSSSCG00000051392	Unknown	5.14851	0.383146	0.000133074	4.76	10	0	0	10	1	0	0	1	Inactive	Inactive	0.25	0.73	-1.73123	0.139946
Higher RPS in liver	1	251218124	ENSSSCG00000005452	C9ORF152	5.16245	1.30405	5.87488e-09	3.85625	4	0	0	4	1	0	1	0	Inactive	Inactive	0.48	0.46	-	-
Higher RPS in liver	1	252559130	ENSSSCG00000005463	SHOC1	8.42922	2.89008	2.47983e-09	5.5375	6	3	1	2	2	0	2	0	Inactive	Inactive	0	0	-	-
Higher RPS in liver	1	252651879	ENSSSCG00000022780	UGCG	13.7753	7.30712	3.81381e-08	6.46875	10	7	2	1	5	0	4	1	Active	Active	86.51	65.47	0.423216	0.0603262
Higher RPS in liver	1	252956341	ENSSSCG00000005465	SUSD1	5.71624	1.27571	8.70691e-09	4.44125	4	0	0	4	1	0	1	0	Active	Active	8.67	6.1	0.573199	0.0310228
Higher RPS in liver	1	253093050	ENSSSCG00000005466	PTBP3	40.4614	18.7044	6.45684e-09	21.7563	29	0	9	20	13	0	6	7	Active	Active	62.31	18.48	1.85813	1.04145e-10
Higher RPS in liver	1	253124471	ENSSSCG00000005467	HSDL2	25.6403	20.0879	2.68033e-08	5.55	17	1	3	13	13	0	5	8	Active	Active	778.65	20.5	5.10562	4.07633e-133
Higher RPS in liver	1	254067492	ENSSSCG00000005480	RGS3	30.4303	26.1791	3.82608e-07	4.25125	20	0	10	10	16	6	0	10	Inactive	Inactive	12.1	36.24	-1.61487	3.99301e-14
Higher RPS in liver	1	255211929	ENSSSCG00000042680	TEX48	8.86922	4.42072	2.28205e-08	4.4475	6	0	6	0	3	1	2	0	Inactive	Inactive	0.07	0	-	-
Higher RPS in liver	1	255349456	ENSSSCG00000034087	TNFSF15	5.97217	0	1.58421e-10	5.96625	4	0	4	0	0	0	0	0	Active	Active	2.82	4.35	-0.723307	0.0705597
Higher RPS in liver	1	261407716	ENSSSCG00000036639	STOM	8.08652	4.68755	7.09461e-07	3.4025	5	0	5	0	3	0	2	1	Active	Active	122.62	22.76	2.36289	4.14353e-14
Higher RPS in liver	1	262752228	ENSSSCG00000031516	Unknown	7.31081	3.28308	0.00105374	4.0275	9	0	0	9	4	0	0	4	Inactive	Inactive	0	0.05	-	-
Higher RPS in liver	1	262775675	ENSSSCG00000032825	OR1J4	7.71652	3.38736	0.00721685	4.3275	10	0	0	10	4	0	0	4	Inactive	Inactive	0.02	0.01	-	-
Higher RPS in liver	1	262830498	ENSSSCG00000027732	OR1J4	17.825	11.6713	0.00532387	6.15375	20	0	0	20	13	0	0	13	Inactive	Inactive	0.04	0.1	-	-
Higher RPS in liver	1	262950329	ENSSSCG00000026287	OR1L3	8.68969	3.86859	0.00622064	4.82	15	0	0	15	7	0	0	7	Active	Inactive	0.01	0.02	-	-
Higher RPS in liver	1	268237459	ENSSSCG00000005619	TOR2A	24.1329	18.895	3.75252e-07	5.23875	16	0	3	13	12	0	0	12	Active	Active	6.05	10.71	-1.29917	1.34891e-05
Higher RPS in liver	1	268343827	ENSSSCG00000005625	ENG	3.85742	0	2.21189e-07	3.85125	3	0	1	2	0	0	0	0	Active	Active	27.39	6.75	2.14757	3.86778e-10
Higher RPS in liver	1	268365598	ENSSSCG00000005627	AK1	8.91633	4.33211	3.85535e-08	4.585	6	0	1	5	3	0	1	2	Active	Active	7.22	66.17	-3.16501	3.12206e-28
Higher RPS in liver	1	268384777	ENSSSCG00000005623	ST6GALNAC6	4.10056	0	4.48971e-08	4.09625	3	0	0	3	0	0	0	0	Active	Active	47.2	76.08	-1.03979	0.000275137
Higher RPS in liver	1	269167196	ENSSSCG00000005662	SPOUT1	4.68514	0	1.05223e-08	4.67875	3	0	0	3	0	0	0	0	Active	Active	20.27	7.42	1.2091	4.56425e-06
Higher RPS in liver	1	269259156	ENSSSCG00000005666	DOLK	14.4893	4.41203	2.5513e-07	10.08	10	0	0	10	3	0	1	2	Active	Active	14.3	19.64	-0.679212	0.0366784
Higher RPS in liver	1	269259519	ENSSSCG00000005667	NUP188	14.4893	4.41203	2.5513e-07	10.08	10	0	0	10	3	0	1	2	Active	Active	8.31	22.74	-1.38256	1.32178e-06
Higher RPS in liver	1	269816647	ENSSSCG00000032122	C9orf50	29.9145	18.407	1.89262e-10	11.5087	19	0	2	17	11	0	0	11	Active	Inactive	0.28	1.74	-2.67	3.71215e-09
Higher RPS in liver	1	269819750	ENSSSCG00000005678	NTMT1	29.9145	18.407	1.89262e-10	11.5087	19	0	2	17	11	0	0	11	Active	Active	16.51	11.86	0.480389	0.108428
Higher RPS in liver	1	270748537	ENSSSCG00000005704	EXOSC2	22.1365	13.5354	8.2308e-08	8.6	15	0	1	14	8	1	1	6	Active	Active	40.89	22.54	0.709716	0.0236393
Higher RPS in liver	1	271600879	ENSSSCG00000005719	RAPGEF1	14.905	4.05722	1.19834e-08	10.8513	10	5	0	5	3	0	2	1	Active	Active	10.09	28.91	-1.6706	5.39044e-13
Higher RPS in liver	1	272955197	ENSSSCG00000032106	SURF6	6.88207	1.61507	8.23873e-07	5.2675	6	0	1	5	1	0	0	1	Active	Active	37.46	18.58	1.00058	0.000568128
Higher RPS in liver	1	273476208	ENSSSCG00000005743	VAV2	33.8563	28.56	3.90192e-06	5.29375	20	0	6	14	16	0	6	10	Active	Active	19.27	17.5	0.0186688	0.923606
Higher RPS in liver	1	273534361	ENSSSCG00000005749	BRD3	6.35517	3.03859	0.000190532	3.31625	5	3	0	2	2	0	1	1	Active	Active	14.45	17.31	-0.419984	0.0205264
Higher RPS in liver	1	273560315	ENSSSCG00000024912	WDR5	23.0792	14.4766	2.8584e-05	8.60375	18	9	1	8	12	1	1	10	Active	Active	64.64	22.67	1.38659	2.42397e-12
Higher RPS in liver	1	273656888	ENSSSCG00000050374	Unknown	21.6359	4.20209	5.82831e-06	17.4325	15	8	0	7	4	0	0	4	Active	Inactive	0.16	1.97	-4.56439	8.24661e-06
Higher RPS in liver	1	273705503	ENSSSCG00000038220	RXRA	41.133	17.6557	1.13226e-10	23.4775	25	7	1	17	12	0	2	10	Active	Active	69.53	6.42	3.12103	4.71304e-59
Higher RPS in liver	13	782476	ENSSSCG00000039788	FAM136A	5.69576	1.68835	1.31574e-05	4.00625	4	0	0	4	1	0	0	1	Inactive	Inactive	2.79	2.73	0.278214	0.655636
Higher RPS in liver	13	2585550	ENSSSCG00000024938	SH3BP5	14.2172	8.39914	3.47385e-09	5.81875	9	9	0	0	5	5	0	0	Active	Active	46.13	22.35	1.16373	0.000268717
Higher RPS in liver	13	2654795	ENSSSCG00000011190	METTL6	13.9373	8.69059	0.0344095	5.24625	11	9	0	2	6	4	1	1	Active	Active	28	22.29	0.341599	0.0531747
Higher RPS in liver	13	2654251	ENSSSCG00000026622	EAF1	13.9373	8.69059	0.0344095	5.24625	11	9	0	2	6	4	1	1	Active	Active	82.31	38.47	0.873973	0.0092845
Higher RPS in liver	13	3675021	ENSSSCG00000011198	RFTN1	33.1471	24.0897	1.6116e-06	9.0575	24	9	2	13	16	16	0	0	Active	Active	19.57	15.47	0.292358	0.144229
Higher RPS in liver	13	5484544	ENSSSCG00000044480	Unknown	21.5424	3.39016	0.00203474	18.155	40	0	3	37	5	0	0	5	Inactive	Inactive	0.17	2.59	-4.6952	1.81174e-06
Higher RPS in liver	13	8632614	ENSSSCG00000045079	Unknown	6.07127	1.92521	0.0193875	4.1475	8	0	0	8	2	0	0	2	Inactive	Inactive	0.24	0.5	-	-
Higher RPS in liver	13	11359544	ENSSSCG00000036033	THRB	13.0533	5.47221	0.00571825	7.58125	12	0	6	6	4	4	0	0	Active	Active	16.74	58.24	-1.78838	3.10918e-06
Higher RPS in liver	13	16784491	ENSSSCG00000011226	TGFBR2	11.1282	3.97697	0.000163123	7.1525	9	6	2	1	4	2	1	1	Active	Active	118.82	24.04	2.23007	2.58841e-41
Higher RPS in liver	13	18296354	ENSSSCG00000024546	TCEAL8	4.29347	0	8.46107e-06	4.28875	4	0	2	2	0	0	0	0	Inactive	Inactive	0	0	-	-
Higher RPS in liver	13	21209018	ENSSSCG00000048477	Unknown	5.2582	0	2.13149e-08	5.2525	4	0	0	4	0	0	0	0	Inactive	Inactive	0.16	0.41	-	-
Higher RPS in liver	13	21670424	ENSSSCG00000027738	LRRFIP2	9.57225	1.31717	4.8666e-09	8.25375	7	0	3	4	1	0	1	0	Active	Active	48.29	26.11	0.90211	4.00778e-12
Higher RPS in liver	13	22831915	ENSSSCG00000011246	VILL	15.9566	9.00127	1.04293e-06	6.955	11	5	0	6	6	1	0	5	Active	Inactive	0.96	1.27	-0.258256	0.642035
Higher RPS in liver	13	22964071	ENSSSCG00000011251	MYD88	6.40767	0	0.00043575	6.4025	6	0	0	6	0	0	0	0	Active	Inactive	12.29	5.94	0.974359	5.53307e-06
Higher RPS in liver	13	23438385	ENSSSCG00000011259	SCN5A	18.2715	12.1614	4.29022e-06	6.11	13	0	1	12	8	0	6	2	Active	Active	0.12	5.38	-5.33046	3.93757e-31
Higher RPS in liver	13	24072527	ENSSSCG00000037236	RPSA	3.54287	0	8.36142e-07	3.53625	3	0	0	3	0	0	0	0	Active	Active	2244.17	503.09	2.03287	1.50936e-17
Higher RPS in liver	13	27006539	ENSSSCG00000011296	ANO10	14.1726	0	4.38162e-08	14.1687	11	11	0	0	0	0	0	0	Active	Active	28.21	31.96	-0.227645	0.329651
Higher RPS in liver	13	27006201	ENSSSCG00000011297	ABHD5	14.1726	0	4.38162e-08	14.1687	11	11	0	0	0	0	0	0	Active	Active	341.76	35.24	3.37133	9.77907e-40
Higher RPS in liver	13	28817141	ENSSSCG00000027176	SACM1L	10.5858	2.86761	8.39232e-07	7.7175	8	0	6	2	2	2	0	0	Active	Active	167.07	43.4	1.997	2.64501e-19
Higher RPS in liver	13	29095901	ENSSSCG00000011318	CXCR6	4.59181	0	2.50776e-07	4.585	5	0	2	3	0	0	0	0	Inactive	Inactive	2.43	0	8.74741	1.07128e-05
Higher RPS in liver	13	29251959	ENSSSCG00000024311	CCR2	5.87243	2.69698	8.06896e-05	3.17375	5	0	5	0	2	0	1	1	Inactive	Inactive	6.28	0.47	3.84491	1.51526e-17
Higher RPS in liver	13	29383303	ENSSSCG00000024344	CCR5	29.8927	24.1751	7.41493e-05	5.71625	22	0	9	13	16	0	11	5	Active	Active	8.15	8.71	0.103151	0.853534
Higher RPS in liver	13	29402539	ENSSSCG00000023557	CCRL2	11.7471	0	1.82409e-09	11.7413	10	0	3	7	0	0	0	0	Active	Active	18.11	2.3	2.93971	4.9084e-13
Higher RPS in liver	13	31904240	ENSSSCG00000036636	C3ORF62	16.5538	10.7554	1.13132e-07	5.79875	10	2	0	8	6	3	0	3	Active	Active	16.28	11.09	0.509654	0.00211009
Higher RPS in liver	13	31904348	ENSSSCG00000011382	USP4	16.5538	10.7554	1.13132e-07	5.79875	10	2	0	8	6	3	0	3	Active	Active	42.19	39.26	0.103925	0.567375
Higher RPS in liver	13	31917335	ENSSSCG00000033727	GPX1	15.8814	7.91603	8.57739e-09	7.96625	10	1	1	8	5	2	0	3	Active	Active	364.14	30.3	3.22649	1.97905e-27
Higher RPS in liver	13	32003722	ENSSSCG00000022080	RHOA	22.3094	4.68737	4.87761e-10	17.6212	15	0	2	13	3	0	0	3	Active	Inactive	82.94	58.96	0.49553	0.00522989
Higher RPS in liver	13	31991567	ENSSSCG00000037459	TCTA	13.6142	3.36977	6.75071e-10	10.2462	9	0	1	8	2	0	0	2	Active	Active	39.43	21.82	0.751654	0.00274205
Higher RPS in liver	13	32002470	ENSSSCG00000022975	AMT	22.3094	4.68737	4.87761e-10	17.6212	15	0	2	13	3	0	0	3	Active	Active	300.58	15.63	3.96535	5.4897e-27
Higher RPS in liver	13	32007217	ENSSSCG00000031594	NICN1	25.0327	7.94813	4.2533e-11	17.0862	16	0	1	15	5	0	0	5	Active	Active	49.95	41.37	-0.023561	0.909448
Higher RPS in liver	13	32029329	ENSSSCG00000034357	DAG1	22.6194	2.85591	7.8544e-10	19.7613	16	0	0	16	2	0	0	2	Active	Active	25.28	66.97	-1.39987	1.6224e-08
Higher RPS in liver	13	33045596	ENSSSCG00000037433	C3ORF18	19.1163	12.1088	9.04404e-08	7.005	14	0	1	13	8	0	1	7	Active	Active	3.89	7.86	-0.937721	0.000138635
Higher RPS in liver	13	33047116	ENSSSCG00000025272	HEMK1	19.1163	12.1088	9.04404e-08	7.005	14	0	1	13	8	0	1	7	Active	Active	39.83	13.02	1.52238	5.96881e-11
Higher RPS in liver	13	34022726	ENSSSCG00000049278	IQCF3	10.3787	0.953378	1.52913e-10	9.425	8	0	3	5	1	0	0	1	Inactive	Inactive	7.55	3.22	1.44493	0.00290761
Higher RPS in liver	13	34029457	ENSSSCG00000025367	Unknown	11.4867	5.45905	1.07001e-07	6.03	9	0	4	5	4	4	0	0	Inactive	Inactive	0.07	0.06	-	-
Higher RPS in liver	13	34035821	ENSSSCG00000023824	IQCF2	9.32352	0	5.50555e-09	9.3175	7	0	2	5	0	0	0	0	Inactive	Inactive	0.48	2.13	-2.34458	0.0301484
Higher RPS in liver	13	34048882	ENSSSCG00000029447	IQCF5	3.47291	0	5.67239e-07	3.46875	3	0	2	1	0	0	0	0	Inactive	Inactive	0.03	0	-	-
Higher RPS in liver	13	34059385	ENSSSCG00000029827	IQCF1	4.69981	0	3.07527e-07	4.69375	4	0	2	2	0	0	0	0	Inactive	Inactive	0.06	0.16	-	-
Higher RPS in liver	13	34088198	ENSSSCG00000048899	GPR62	12.1514	2.71529	6.55751e-11	9.435	9	0	4	5	2	2	0	0	Active	Active	0.08	2.03	-5.16459	5.26923e-06
Higher RPS in liver	13	34104696	ENSSSCG00000028446	PCBP4	15.836	5.5631	4.42963e-09	10.2737	12	0	5	7	4	4	0	0	Active	Active	47.24	92.73	-1.19597	2.85317e-06
Higher RPS in liver	13	34104363	ENSSSCG00000023325	ACY1	15.836	5.5631	4.42963e-09	10.2737	12	0	5	7	4	4	0	0	Active	Active	1043.99	49.23	4.24594	8.5531e-41
Higher RPS in liver	13	34104425	ENSSSCG00000030229	ABHD14A	15.836	5.5631	4.42963e-09	10.2737	12	0	5	7	4	4	0	0	Active	Active	18.13	28.85	-0.765017	0.00411587
Higher RPS in liver	13	34313073	ENSSSCG00000011426	POC1A	5.42181	0	8.19779e-08	5.4175	4	0	0	4	0	0	0	0	Active	Inactive	22.54	26.92	-0.494578	0.088772
Higher RPS in liver	13	34357673	ENSSSCG00000011436	AC097637.1	13.1175	1.4802	0.00050643	11.6387	11	0	1	10	1	0	0	1	Active	Active	0.51	1.47	-1.41497	1.41754e-08
Higher RPS in liver	13	34371842	ENSSSCG00000011435	TWF2	5.42253	1.78586	1.02006e-08	3.63625	4	0	0	4	1	0	0	1	Inactive	Inactive	48.62	65.6	-0.50334	0.070336
Higher RPS in liver	13	34892339	ENSSSCG00000011450	ITIH1	9.45525	0	4.13753e-08	9.4525	6	0	2	4	0	0	0	0	Active	Inactive	1824.75	0.17	13.0534	3.96728e-85
Higher RPS in liver	13	34892369	ENSSSCG00000011451	ITIH3	9.45525	0	4.13753e-08	9.4525	6	0	2	4	0	0	0	0	Active	Inactive	1465.76	0.51	11.4278	1.94821e-144
Higher RPS in liver	13	34993119	ENSSSCG00000041313	Unknown	15.5197	2.86037	8.21241e-10	12.66	11	0	2	9	2	0	0	2	Inactive	Inactive	2.97	7.21	-1.18999	0.000177649
Higher RPS in liver	13	35180041	ENSSSCG00000011454	SFMBT1	25.3004	9.85148	1.2138e-09	15.4512	19	0	6	13	7	0	1	6	Active	Active	18.56	19.85	0.00805814	0.972908
Higher RPS in liver	13	35377580	ENSSSCG00000021408	TKT	3.27797	0	1.2346e-08	3.27375	2	0	2	0	0	0	0	0	Active	Active	206.71	129.64	0.535245	0.00239189
Higher RPS in liver	13	38557931	ENSSSCG00000024201	TASOR	8.50974	4.52951	2.21503e-08	3.9825	6	0	3	3	3	3	0	0	Inactive	Inactive	131.45	52.62	1.23585	7.75551e-09
Higher RPS in liver	13	39789703	ENSSSCG00000011471	FLNB	19.8898	8.46928	1.65718e-09	11.4187	14	13	0	1	6	5	0	1	Active	Active	55.17	51.77	0.153601	0.518872
Higher RPS in liver	13	40768664	ENSSSCG00000011482	CFAP20DC	5.24213	0	5.58686e-10	5.2375	4	0	1	3	0	0	0	0	Active	Active	14.04	10.63	0.383295	0.129595
Higher RPS in liver	13	47567518	ENSSSCG00000011497	MAGI1	17.5451	1.27399	6.96399e-11	16.27	13	0	6	7	1	0	1	0	Active	Active	16.22	46.67	-1.37154	6.93707e-08
Higher RPS in liver	13	49090468	ENSSSCG00000011501	SUCLG2	3.83476	0	1.91593e-09	3.83	3	0	3	0	0	0	0	0	Active	Active	837.92	23.99	4.95118	5.78303e-102
Higher RPS in liver	13	54385581	ENSSSCG00000041059	Unknown	18.3263	10.5776	5.52327e-08	7.7475	14	0	0	14	7	0	0	7	Inactive	Inactive	0.99	4.99	-2.27601	3.07257e-17
Higher RPS in liver	13	55034334	ENSSSCG00000048446	Unknown	12.4776	3.74766	0.00698935	8.72875	22	0	2	20	5	0	1	4	Inactive	Inactive	0.09	0.06	-	-
Higher RPS in liver	13	61068126	ENSSSCG00000023437	ITPR1	6.34248	2.8261	1.03694e-07	3.51875	5	3	0	2	2	0	2	0	Active	Active	58.9	73.36	-0.270427	0.213215
Higher RPS in liver	13	61526197	ENSSSCG00000036136	BHLHE40	35.7585	24.7571	8.08067e-07	10.9987	26	17	2	7	16	9	2	5	Active	Active	16.47	34.44	-1.15663	0.000107182
Higher RPS in liver	13	69290108	ENSSSCG00000011593	TMCC1	11.3541	4.31847	4.32646e-09	7.035	9	0	2	7	3	0	1	2	Active	Active	27.37	38.24	-0.487451	0.000112507
Higher RPS in liver	13	69895217	ENSSSCG00000040594	C3ORF20	24.8035	17.2588	6.57403e-08	7.54625	17	0	4	13	10	0	8	2	Inactive	Inactive	0.27	0.61	-1.04377	0.0549389
Higher RPS in liver	13	69915655	ENSSSCG00000040702	CCDC174	5.18755	1.44792	4.10199e-08	3.73875	4	0	0	4	1	0	1	0	Inactive	Inactive	14.24	10.38	0.492981	0.00854771
Higher RPS in liver	13	71374961	ENSSSCG00000023354	ACAD9	6.71639	3.12198	4.03148e-05	3.595	5	0	0	5	2	0	2	0	Active	Active	31.17	10.61	1.48387	6.75417e-13
Higher RPS in liver	13	71560012	ENSSSCG00000031176	GP9	14.5987	2.4358	2.21994e-08	12.1625	11	0	1	10	2	2	0	0	Active	Active	2.29	3.38	-0.650633	0.157417
Higher RPS in liver	13	71596249	ENSSSCG00000037568	RAB43	19.1064	4.95662	4.86222e-09	14.1487	13	0	1	12	3	3	0	0	Active	Active	58.1	10.45	2.26749	9.3284e-36
Higher RPS in liver	13	71646564	ENSSSCG00000040879	CNBP	4.77539	1.57103	2.12488e-09	3.20375	3	0	0	3	1	1	0	0	Active	Active	262.05	76.43	1.71957	4.07696e-33
Higher RPS in liver	13	71672733	ENSSSCG00000011616	COPG1	7.90522	0	6.58361e-09	7.9	5	0	0	5	0	0	0	0	Active	Inactive	122.04	167.47	-0.392199	0.10339
Higher RPS in liver	13	71732277	ENSSSCG00000011611	HMCES	8.405	1.41783	3.45011e-07	6.9875	7	0	0	7	1	0	0	1	Active	Active	84.87	22.02	1.86083	1.36472e-15
Higher RPS in liver	13	72479337	ENSSSCG00000024134	MGLL	6.48726	0	3.80816e-10	6.48375	5	5	0	0	0	0	0	0	Inactive	Inactive	5.48	46.27	-3.28941	1.42922e-60
Higher RPS in liver	13	74846793	ENSSSCG00000021966	TOPBP1	4.62222	1.59521	1.23954e-07	3.025	3	0	0	3	1	0	0	1	Active	Active	94.64	61.36	0.589864	0.00398539
Higher RPS in liver	13	74862542	ENSSSCG00000028203	Unknown	8.56903	0	9.0421e-10	8.56375	6	0	1	5	0	0	0	0	Active	Active	1113.87	1.82	9.03978	6.57821e-145
Higher RPS in liver	13	74930655	ENSSSCG00000011640	TF	16.1925	0	2.52242e-09	16.1875	11	0	4	7	0	0	0	0	Active	Inactive	73295.6	16.58	11.8887	8.85285e-160
Higher RPS in liver	13	75605140	ENSSSCG00000033057	ANAPC13	16.684	10.3091	1.78892e-08	6.37625	12	0	2	10	7	0	1	6	Active	Active	387.32	52.95	2.89248	3.34933e-30
Higher RPS in liver	13	75605689	ENSSSCG00000011645	CEP63	16.684	10.3091	1.78892e-08	6.37625	12	0	2	10	7	0	1	6	Active	Active	38.14	31.34	0.385217	0.0456987
Higher RPS in liver	13	77217428	ENSSSCG00000011653	PCCB	6.62015	2.71032	5.10685e-07	3.91125	5	0	2	3	2	0	0	2	Active	Active	245.58	27.89	3.01438	9.16841e-56
Higher RPS in liver	13	79862044	ENSSSCG00000044289	PRR23C	34.6681	17.7312	0.0252178	16.9375	63	0	2	61	25	0	4	21	Active	Active	0	0	-	-
Higher RPS in liver	13	83308007	ENSSSCG00000011680	PLS1	12.1498	0	2.43492e-11	12.145	9	5	1	3	0	0	0	0	Active	Active	253.78	2.22	6.8318	2.17083e-148
Higher RPS in liver	13	84634030	ENSSSCG00000036206	DIPK2A	5.93521	2.67955	0.0143961	3.2575	6	0	4	2	2	1	1	0	Active	Active	41.36	14.65	1.628	5.21946e-07
Higher RPS in liver	13	85848449	ENSSSCG00000044740	Unknown	6.07404	1.54303	0.00168735	4.5325	6	0	2	4	1	0	0	1	Inactive	Inactive	0.26	1.05	-1.82473	5.12872e-06
Higher RPS in liver	13	86513105	ENSSSCG00000011689	PLOD2	6.00193	2.77222	4.95671e-05	3.23125	5	0	2	3	2	0	0	2	Active	Active	88.04	16.02	2.45023	2.26725e-20
Higher RPS in liver	13	88934868	ENSSSCG00000011695	AGTR1	9.50342	0	7.09241e-06	9.49875	9	6	1	2	0	0	0	0	Active	Active	100.35	2.32	5.37113	1.91853e-66
Higher RPS in liver	13	89360874	ENSSSCG00000011699	HPS3	5.55238	1.51234	2.65864e-08	4.0375	4	0	3	1	1	0	0	1	Active	Active	42.21	24.75	0.557346	0.0880007
Higher RPS in liver	13	89513351	ENSSSCG00000025468	Unknown	29.4605	14.8734	2.7087e-10	14.5838	20	0	6	14	9	0	6	3	Inactive	Inactive	0.54	0.13	2.47957	0.00019383
Higher RPS in liver	13	89571146	ENSSSCG00000011703	TM4SF4	21.7611	11.1677	3.71312e-09	10.5938	14	10	0	4	7	0	3	4	Inactive	Inactive	1079.62	2.01	9.04953	3.504e-261
Higher RPS in liver	13	89600027	ENSSSCG00000033018	TM4SF1	10.8968	0	1.4762e-08	10.8912	8	4	0	4	0	0	0	0	Active	Active	143.7	18.73	3.04266	3.65403e-18
Higher RPS in liver	13	90183742	ENSSSCG00000030260	PFN2	37.3572	28.4524	2.76512e-07	8.90625	26	0	12	14	17	0	17	0	Active	Active	324.55	652.91	-1.02593	0.000109068
Higher RPS in liver	13	96390112	ENSSSCG00000030567	SSR3	6.60368	3.03978	1.02585e-06	3.5625	5	0	4	1	2	0	1	1	Active	Active	310.76	48.49	2.55356	1.06642e-23
Higher RPS in liver	13	96651960	ENSSSCG00000026579	LEKR1	16.0392	5.89596	4.17578e-09	10.1425	12	0	3	9	4	0	0	4	Active	Active	2.71	4.81	-0.833152	0.0651864
Higher RPS in liver	13	109623787	ENSSSCG00000020927	SLC2A2	11.6511	0	2.19012e-09	11.6463	8	8	0	0	0	0	0	0	Active	Inactive	1320.58	0.77	10.6545	0
Higher RPS in liver	13	110414319	ENSSSCG00000011751	TMEM212	31.9916	0	1.12779e-11	31.9875	22	17	0	5	0	0	0	0	Inactive	Inactive	1	2.14	-1.03489	0.00222986
Higher RPS in liver	13	110587535	ENSSSCG00000011752	FNDC3B	4.4391	0	1.46498e-11	4.43375	3	3	0	0	0	0	0	0	Active	Active	135.39	12.17	3.43724	2.89133e-74
Higher RPS in liver	13	111107423	ENSSSCG00000020906	GHSR	3.97464	0	2.22771e-07	3.97	3	1	0	2	0	0	0	0	Inactive	Inactive	240.63	16.57	3.86356	5.22196e-16
Higher RPS in liver	13	115488176	ENSSSCG00000011760	TBL1XR1	23.6056	15.6282	1.79266e-07	7.9775	17	0	5	12	10	0	3	7	Active	Active	114.87	109.22	0.0716863	0.691805
Higher RPS in liver	13	117180544	ENSSSCG00000030413	PIK3CA	5.27158	1.69862	2.91003e-08	3.5725	4	0	1	3	1	0	0	1	Active	Active	70.93	56.14	0.346049	0.143094
Higher RPS in liver	13	121817150	ENSSSCG00000051373	Unknown	5.07247	0	1.75357e-09	5.0675	4	0	0	4	0	0	0	0	Inactive	Inactive	1.47	2.85	-0.895523	0.0207459
Higher RPS in liver	13	122043195	ENSSSCG00000042409	Unknown	12.538	1.46381	4.12114e-08	11.0725	10	0	2	8	1	0	1	0	Inactive	Inactive	1.49	4.44	-1.62907	1.99622e-10
Higher RPS in liver	13	121847824	ENSSSCG00000011780	Unknown	7.89405	2.77441	2.26723e-10	5.12125	6	0	1	5	2	0	0	2	Inactive	Inactive	0.05	0	-	-
Higher RPS in liver	13	122060360	ENSSSCG00000011782	ABCC5	24.9361	18.7131	1.38249e-06	6.22375	16	0	2	14	12	0	2	10	Active	Active	11.09	63.14	-2.45135	4.7239e-38
Higher RPS in liver	13	121969656	ENSSSCG00000011784	Unknown	6.38362	2.86018	3.47846e-07	3.52375	5	0	0	5	2	0	2	0	Inactive	Inactive	0	0.01	-	-
Higher RPS in liver	13	122005404	ENSSSCG00000039519	Unknown	6.8917	1.45931	3.65688e-09	5.4325	5	0	0	5	1	0	1	0	Inactive	Inactive	0.03	0	-	-
Higher RPS in liver	13	122060484	ENSSSCG00000011783	EIF2B5	24.9361	18.7131	1.38249e-06	6.22375	16	0	2	14	12	0	2	10	Active	Active	64.9	47.79	0.381034	0.0113145
Higher RPS in liver	13	122076003	ENSSSCG00000025374	DVL3	24.4832	17.4233	5.40983e-07	7.06	16	0	2	14	11	0	1	10	Active	Active	11.02	17.12	-0.650752	0.00667982
Higher RPS in liver	13	122089938	ENSSSCG00000024437	AP2M1	17.3581	13.0807	6.19133e-08	4.2775	12	0	2	10	9	0	1	8	Inactive	Inactive	389.87	441.5	-0.257202	0.292608
Higher RPS in liver	13	122224939	ENSSSCG00000028372	FAM131A	11.8025	8.14052	1.25513e-05	3.66125	9	0	2	7	6	0	3	3	Active	Inactive	1.55	43.9	-4.83789	9.32447e-123
Higher RPS in liver	13	122249867	ENSSSCG00000021581	CLCN2	22.4056	16.2909	2.6133e-07	6.115	17	0	0	17	11	0	3	8	Active	Active	1.6	10.38	-2.71471	1.82773e-18
Higher RPS in liver	13	122249909	ENSSSCG00000022507	POLR2H	22.4056	16.2909	2.6133e-07	6.115	17	0	0	17	11	0	3	8	Active	Active	38.38	30.89	0.352532	0.116091
Higher RPS in liver	13	122693746	ENSSSCG00000011788	VPS8	7.7673	4.59499	7.76517e-05	3.17	6	0	0	6	3	0	0	3	Active	Active	29.65	59.84	-0.996789	2.868e-11
Higher RPS in liver	13	123806282	ENSSSCG00000039758	Unknown	24.1859	13.0211	3.68973e-09	11.165	16	0	0	16	9	0	8	1	Inactive	Inactive	77.4	0.72	6.98114	2.95378e-31
Higher RPS in liver	13	124390539	ENSSSCG00000011797	TBCCD1	12.6016	2.67132	5.70896e-09	9.92875	10	0	4	6	2	0	0	2	Active	Active	21.83	23.02	-0.0645401	0.69161
Higher RPS in liver	13	124390970	ENSSSCG00000011798	AC068631.2	12.6016	2.67132	5.70896e-09	9.92875	10	0	4	6	2	0	0	2	Active	Active	108.6	13.9	3.09471	1.80032e-20
Higher RPS in liver	13	124505303	ENSSSCG00000011801	HRG	7.29203	0	4.39194e-08	7.2875	5	0	0	5	0	0	0	0	Inactive	Inactive	903.21	0.01	16.7703	2.45034e-33
Higher RPS in liver	13	124521277	ENSSSCG00000011802	KNG1	7.49614	0	1.36222e-09	7.49125	5	0	0	5	0	0	0	0	Active	Inactive	3205.37	0.08	15.5264	1.17289e-61
Higher RPS in liver	13	124604426	ENSSSCG00000011804	RFC4	14.6457	1.24258	2.35441e-10	13.4038	11	0	0	11	1	0	1	0	Active	Active	83.99	7.29	3.49393	6.3046e-54
Higher RPS in liver	13	124633684	ENSSSCG00000039103	ADIPOQ	49.5363	7.17369	2.10679e-13	42.3612	35	0	11	24	5	0	1	4	Inactive	Inactive	1.05	1.2	-0.380857	0.401845
Higher RPS in liver	13	124700133	ENSSSCG00000025770	ST6GAL1	17.0241	1.45763	6.12408e-12	15.565	12	0	8	4	1	0	0	1	Active	Active	646.01	16.25	5.18676	1.34117e-89
Higher RPS in liver	13	125054463	ENSSSCG00000011806	MASP1	36.6894	26.7365	1.16929e-08	9.95125	24	0	2	22	16	0	1	15	Inactive	Inactive	58.76	8.44	2.69562	1.77566e-18
Higher RPS in liver	13	127572163	ENSSSCG00000011813	P3H2	15.1583	3.04178	1.25322e-10	12.1175	10	0	9	1	2	0	0	2	Active	Active	49.48	4.77	3.21797	8.87015e-33
Higher RPS in liver	13	127808599	ENSSSCG00000024788	CLDN16	5.30435	1.42588	5.61004e-10	3.8775	4	0	3	1	1	0	0	1	Inactive	Inactive	0.1	0.07	-	-
Higher RPS in liver	13	129997215	ENSSSCG00000011819	MB21D2	13.2055	10.1401	0.000149374	3.06625	10	0	3	7	7	0	7	0	Active	Active	45.88	18.75	1.25607	3.41924e-11
Higher RPS in liver	13	130093805	ENSSSCG00000041365	Unknown	14.2236	5.85787	2.09717e-09	8.365	10	0	2	8	4	0	4	0	Inactive	Inactive	0.87	1.27	-0.408309	0.264464
Higher RPS in liver	13	131135724	ENSSSCG00000031356	HES1	47.5082	30.0843	1.27245e-08	17.4225	35	4	7	24	19	5	4	10	Active	Active	29.89	13.53	1.08994	0.000510025
Higher RPS in liver	13	131649202	ENSSSCG00000011826	TMEM44	17.4115	12.1706	7.76797e-07	5.24375	13	0	2	11	8	7	0	1	Active	Active	26.98	18.95	0.535959	0.000115624
Higher RPS in liver	13	133875643	ENSSSCG00000011847	ZDHHC19	3.71964	0	1.36423e-08	3.715	3	0	1	2	0	0	0	0	Inactive	Inactive	1.75	1.83	-0.129071	0.823797
Higher RPS in liver	13	133970594	ENSSSCG00000011848	TFRC	14.0281	8.19472	9.87029e-07	5.83125	9	4	0	5	5	0	0	5	Active	Active	415.52	101.71	1.59365	0.00105375
Higher RPS in liver	13	135584975	ENSSSCG00000038756	Unknown	28.3711	22.6925	1.64165e-06	5.67875	19	9	0	10	14	5	2	7	Inactive	Inactive	0.18	0	-	-
Higher RPS in liver	13	137961343	ENSSSCG00000011876	DTX3L	9.15127	5.61857	1.6532e-05	3.5325	7	0	0	7	4	0	0	4	Active	Active	35.53	7.55	2.31031	6.94048e-05
Higher RPS in liver	13	137961357	ENSSSCG00000027709	PARP9	9.15127	5.61857	1.6532e-05	3.5325	7	0	0	7	4	0	0	4	Active	Active	30.06	3.86	3.05404	5.98444e-07
Higher RPS in liver	13	137970489	ENSSSCG00000028475	KPNA1	4.44771	0	4.45364e-06	4.4425	4	0	0	4	0	0	0	0	Inactive	Inactive	46.95	47.88	-0.104944	0.578555
Higher RPS in liver	13	138240965	ENSSSCG00000037882	Unknown	6.98763	1.39314	1.1989e-07	5.59375	5	0	2	3	1	0	0	1	Inactive	Inactive	0.08	0	-	-
Higher RPS in liver	13	138978463	ENSSSCG00000036613	POLQ	14.8351	7.38384	3.05885e-10	7.45375	11	0	0	11	5	0	1	4	Active	Active	18.66	0.75	4.59335	4.91895e-18
Higher RPS in liver	13	146105696	ENSSSCG00000011915	GRAMD1C	9.21019	0	1.46437e-10	9.205	7	0	1	6	0	0	0	0	Active	Active	215.82	9.19	4.51406	6.8685e-49
Higher RPS in liver	13	146421223	ENSSSCG00000024663	SPICE1	19.3144	14.6795	1.38491e-07	4.635	14	0	2	12	10	0	5	5	Inactive	Inactive	11.76	7.8	0.781538	0.00465339
Higher RPS in liver	13	146953149	ENSSSCG00000011925	CD200R1	37.8829	29.8813	3.20884e-08	8.00125	26	0	5	21	19	0	6	13	Inactive	Inactive	20.78	0.33	5.93654	1.07251e-37
Higher RPS in liver	13	147179591	ENSSSCG00000011928	CCDC80	6.1052	1.42623	5.77686e-08	4.67625	5	0	1	4	1	0	0	1	Inactive	Inactive	16.97	4.62	1.92795	8.71623e-07
Higher RPS in liver	13	147522836	ENSSSCG00000027820	CD200	8.02639	1.34361	1.05461e-08	6.68375	6	0	0	6	1	0	0	1	Inactive	Inactive	20.49	147.31	-2.76011	5.71006e-31
Higher RPS in liver	13	147508739	ENSSSCG00000034515	Unknown	19.7518	10.8287	2.92024e-09	8.92375	13	0	4	9	7	0	2	5	Inactive	Inactive	7.19	0.08	8.10823	0.000335841
Higher RPS in liver	13	147517663	ENSSSCG00000023918	SLC9C1	11.1855	4.29248	7.46029e-09	6.8925	8	0	2	6	3	0	0	3	Inactive	Inactive	0.25	0.22	-	-
Higher RPS in liver	13	148579160	ENSSSCG00000011933	NECTIN3	9.31985	0	1.86072e-08	9.31625	7	5	2	0	0	0	0	0	Active	Active	223.65	60.33	1.78636	1.56323e-13
Higher RPS in liver	13	148577909	ENSSSCG00000030335	Unknown	9.31985	0	1.86072e-08	9.31625	7	5	2	0	0	0	0	0	Active	Active	0.22	1.01	-2.57371	1.71725e-06
Higher RPS in liver	13	150272887	ENSSSCG00000040999	Unknown	11.867	0	3.55773e-10	11.8625	9	0	0	9	0	0	0	0	Inactive	Inactive	0.44	0.98	-0.959878	0.0285619
Higher RPS in liver	13	157294478	ENSSSCG00000011951	NFKBIZ	10.9784	6.16952	1.54854e-05	4.80875	8	0	2	6	4	0	0	4	Active	Active	35.11	11.74	1.52677	3.4827e-15
Higher RPS in liver	13	159374504	ENSSSCG00000011973	COL8A1	5.76232	1.33932	3.81184e-07	4.425	5	0	3	2	1	0	1	0	Active	Active	8.24	5.28	0.963595	0.0391199
Higher RPS in liver	13	160311819	ENSSSCG00000027041	Unknown	7.87082	3.20384	4.14145e-05	4.66625	6	5	0	1	2	0	2	0	Inactive	Inactive	0.15	0	-	-
Higher RPS in liver	13	161470159	ENSSSCG00000041359	OR5H8	26.2524	12.2173	0.000181206	14.035	21	0	0	21	9	0	0	9	Inactive	Inactive	0	0	-	-
Higher RPS in liver	13	161520166	ENSSSCG00000033060	OR5H8	10.2572	4.71413	6.74171e-06	5.5425	8	0	0	8	3	0	0	3	Inactive	Inactive	0	0	-	-
Higher RPS in liver	13	161702878	ENSSSCG00000050412	OR5H8	8.3236	3.54456	0.000808207	4.77625	7	0	0	7	2	0	0	2	Inactive	Inactive	0.05	0.14	-	-
Higher RPS in liver	13	161735704	ENSSSCG00000048852	OR5H8	6.49109	3.34778	0.035245	3.14375	7	0	0	7	3	0	0	3	Inactive	Inactive	0.16	0.68	-2.25249	4.2016e-05
Higher RPS in liver	13	161756549	ENSSSCG00000048902	OR5H8	16.9837	10.9703	0.0107822	6.015	15	0	0	15	7	0	0	7	Inactive	Inactive	0.35	0.78	-1.0113	0.0301135
Higher RPS in liver	13	162015294	ENSSSCG00000049779	OR5K3	22.4851	13.4434	0.0403332	9.04375	22	0	0	22	9	0	0	9	Inactive	Inactive	0	0	-	-
Higher RPS in liver	13	162038743	ENSSSCG00000036422	OR5K3	25.5937	11.9283	0.00385402	13.6662	32	0	0	32	12	0	0	12	Inactive	Inactive	0	0	-	-
Higher RPS in liver	13	173634454	ENSSSCG00000012000	GBE1	13.2981	0	1.66835e-09	13.295	10	10	0	0	0	0	0	0	Active	Active	680.14	38.53	4.07218	5.94006e-90
Higher RPS in liver	13	179915177	ENSSSCG00000021038	NRIP1	8.62199	0	6.17706e-10	8.61625	8	4	1	3	0	0	0	0	Active	Active	73.06	107.75	-0.395143	0.148104
Higher RPS in liver	13	182227971	ENSSSCG00000012014	BTG3	4.74765	1.39261	3.8826e-05	3.3525	4	0	4	0	1	0	1	0	Active	Active	276.55	17.46	4.10395	2.02065e-17
Higher RPS in liver	13	190286205	ENSSSCG00000012026	ADAMTS1	29.326	18.4504	9.71608e-07	10.8725	20	0	3	17	11	0	3	8	Active	Active	34.98	2.34	4.01197	4.27973e-57
Higher RPS in liver	13	197093251	ENSSSCG00000034624	TMEM50B	5.90741	1.26813	2.6453e-09	4.64	4	0	0	4	1	0	0	1	Active	Active	79.72	120.85	-0.604446	0.00605961
Higher RPS in liver	13	197114456	ENSSSCG00000028192	DNAJC28	6.97113	0	1.29866e-08	6.9675	5	0	0	5	0	0	0	0	Active	Active	4.66	8.92	-0.84658	0.00387552
Higher RPS in liver	13	197519589	ENSSSCG00000012042	ATP5PO	11.9671	8.14063	1.33629e-07	3.82625	8	0	2	6	5	0	2	3	Active	Active	1862.31	427.07	2.0749	4.21573e-31
Higher RPS in liver	13	199588714	ENSSSCG00000028883	SETD4	5.78579	1.39722	0.000116271	4.38875	5	0	2	3	1	0	0	1	Active	Active	12.96	5.32	1.3462	4.30138e-07
Higher RPS in liver	13	199600314	ENSSSCG00000020706	CBR1	7.52617	0	3.80358e-05	7.52125	6	0	1	5	0	0	0	0	Active	Active	256.94	29.25	3.10344	2.89209e-50
Higher RPS in liver	13	199617318	ENSSSCG00000031111	CBR1	4.2892	0	0.00144044	4.285	5	0	0	5	0	0	0	0	Inactive	Inactive	0.53	0.12	2.22714	0.109364
Higher RPS in liver	13	205153007	ENSSSCG00000012083	RIPK4	15.9882	5.60374	1.15204e-09	10.3825	11	0	2	9	4	0	3	1	Active	Active	2.56	1.9	0.403924	0.200163
Higher RPS in liver	13	206629156	ENSSSCG00000022164	HSF2BP	7.13091	2.95197	7.15426e-06	4.18125	6	0	2	4	2	0	0	2	Active	Active	66.06	23.82	1.24221	1.61074e-07
Higher RPS in liver	13	206629178	ENSSSCG00000021698	RRP1B	7.13091	2.95197	7.15426e-06	4.18125	6	0	2	4	2	0	0	2	Active	Active	14.19	10.38	0.396222	0.142253
Higher RPS in liver	13	207148380	ENSSSCG00000025294	AIRE	10.4782	5.33382	0.0127843	5.14625	9	0	1	8	4	0	2	2	Inactive	Active	0.06	0.2	-	-
Higher RPS in liver	6	160884	ENSSSCG00000002640	DEF8	14.1435	0	1.06055e-10	14.1387	10	0	2	8	0	0	0	0	Active	Active	25.92	43.52	-0.931826	0.000229455
Higher RPS in liver	6	178462	ENSSSCG00000002639	TUBB3	14.2297	2.87585	2.26318e-08	11.3525	11	0	2	9	2	0	0	2	Active	Active	0.54	711.24	-12.3889	6.30212e-87
Higher RPS in liver	6	182187	ENSSSCG00000020924	MC1R	15.6562	0	1.01746e-09	15.6525	12	0	4	8	0	0	0	0	Inactive	Inactive	0.09	0.11	-	-
Higher RPS in liver	6	313366	ENSSSCG00000029228	ZNF276	4.91272	0.649494	1.20037e-05	4.26125	4	0	0	4	1	0	0	1	Active	Active	14.1	7.68	0.732135	0.00439652
Higher RPS in liver	6	313782	ENSSSCG00000022310	VPS9D1	4.91272	0.649494	1.20037e-05	4.26125	4	0	0	4	1	0	0	1	Active	Active	9.6	18.13	-0.99902	0.000596869
Higher RPS in liver	6	326746	ENSSSCG00000029339	SPATA2L	6.84175	1.33531	1.48082e-08	5.50875	5	0	0	5	1	0	0	1	Active	Active	2.53	12.55	-2.45683	9.89104e-10
Higher RPS in liver	6	339142	ENSSSCG00000025401	CDK10	5.08689	0.976342	0.00030456	4.10875	5	0	0	5	1	0	0	1	Active	Active	49.16	26.95	0.75869	0.00119176
Higher RPS in liver	6	351922	ENSSSCG00000023677	CHMP1A	5.20884	0.930842	1.56249e-05	4.2775	4	0	0	4	1	0	0	1	Active	Active	52.4	34.73	0.414237	0.157629
Higher RPS in liver	6	376616	ENSSSCG00000021971	DPEP1	6.40245	1.46835	2.02462e-05	4.93375	5	0	0	5	1	0	0	1	Inactive	Inactive	0.99	0.04	5.52902	7.7394e-06
Higher RPS in liver	6	394344	ENSSSCG00000051285	Unknown	7.20924	0	3.09553e-06	7.20375	6	0	0	6	0	0	0	0	Inactive	Inactive	0.21	0.38	-	-
Higher RPS in liver	6	455851	ENSSSCG00000039541	ANKRD11	16.081	10.4515	7.16957e-06	5.63125	12	0	2	10	7	0	0	7	Active	Active	23.48	12.17	0.872855	0.00561906
Higher RPS in liver	6	988990	ENSSSCG00000040145	SNAI3	3.17817	0	0.00147455	3.17375	4	0	1	3	0	0	0	0	Active	Active	0.09	0.33	-	-
Higher RPS in liver	6	1081538	ENSSSCG00000035967	ZC3H18	4.08332	0	2.99607e-07	4.0775	3	0	0	3	0	0	0	0	Active	Active	12.14	8.21	0.424266	0.094773
Higher RPS in liver	6	1108717	ENSSSCG00000040875	ZFPM1	6.60004	0	1.42866e-09	6.59625	4	0	0	4	0	0	0	0	Active	Inactive	7.31	1.4	2.09292	1.19208e-18
Higher RPS in liver	6	1174257	ENSSSCG00000031875	ZNF469	12.9255	4.71863	7.34876e-06	8.20625	12	0	5	7	3	0	2	1	Inactive	Inactive	0.14	0.53	-1.95233	5.2575e-07
Higher RPS in liver	6	1941077	ENSSSCG00000002655	MAP1LC3B	5.57174	0	2.37105e-08	5.565	4	0	0	4	0	0	0	0	Active	Active	483.1	275.3	0.755516	0.000246583
Higher RPS in liver	6	2003704	ENSSSCG00000002657	C16orf95	4.52205	0	1.40486e-08	4.5175	3	0	0	3	0	0	0	0	Inactive	Inactive	1.14	0.96	0.146498	0.802741
Higher RPS in liver	6	2554367	ENSSSCG00000029296	FOXC2	24.0989	19.4735	0.000180409	4.625	18	0	4	14	12	6	6	0	Active	Active	0.15	1.38	-3.27147	0.00116884
Higher RPS in liver	6	2597659	ENSSSCG00000038460	FOXF1	25.0757	12.1691	1.79246e-08	12.9062	20	0	9	11	8	4	2	2	Active	Active	2.39	1.48	0.523239	0.103398
Higher RPS in liver	6	4080160	ENSSSCG00000038285	KLHL36	8.45703	1.45958	2.58486e-08	6.99875	6	0	2	4	1	0	0	1	Active	Active	17.12	20.38	-0.385315	0.0809112
Higher RPS in liver	6	4448780	ENSSSCG00000002680	TAF1C	4.93317	1.47527	1.4426e-06	3.4575	4	0	0	4	1	0	0	1	Active	Active	3.53	5.71	-0.848695	0.0102039
Higher RPS in liver	6	4503573	ENSSSCG00000002682	MBTPS1	5.24878	0	1.27343e-09	5.24375	4	0	0	4	0	0	0	0	Active	Active	86.04	44.76	0.838584	5.83664e-07
Higher RPS in liver	6	4675813	ENSSSCG00000032115	OSGIN1	9.98312	1.45235	1.64892e-07	8.53125	8	0	1	7	1	0	1	0	Inactive	Inactive	40.14	1.05	5.09832	2.35416e-69
Higher RPS in liver	6	6360707	ENSSSCG00000038221	HSD17B2	6.52644	0	7.46883e-08	6.52125	5	1	0	4	0	0	0	0	Active	Inactive	437.02	0.08	12.5415	1.05615e-20
Higher RPS in liver	6	6387363	ENSSSCG00000035182	SDR42E1	7.14829	0	2.74962e-08	7.145	5	1	0	4	0	0	0	0	Active	Active	21.42	5.88	1.78431	2.26523e-12
Higher RPS in liver	6	8468112	ENSSSCG00000040607	MAF	10.6678	4.68274	2.25444e-06	5.985	9	2	1	6	3	2	0	1	Active	Active	143.05	20.78	2.79775	1.9848e-29
Higher RPS in liver	6	10173980	ENSSSCG00000002697	NUDT7	11.4261	0	4.09704e-10	11.42	9	0	1	8	0	0	0	0	Active	Active	148.87	36.31	1.95681	2.14613e-14
Higher RPS in liver	6	10173263	ENSSSCG00000038627	ADAMTS18	11.4261	0	4.09704e-10	11.42	9	0	1	8	0	0	0	0	Active	Active	1.74	6.77	-2.1235	2.49224e-13
Higher RPS in liver	6	10196455	ENSSSCG00000049761	Unknown	12.3506	1.02778	3.82615e-06	11.325	11	0	1	10	1	0	0	1	Inactive	Inactive	0.14	0.96	-2.86945	1.60907e-06
Higher RPS in liver	6	12057445	ENSSSCG00000002703	TERF2IP	4.13377	0	4.14099e-05	4.12875	4	0	0	4	0	0	0	0	Active	Active	99.38	95.18	0.0348618	0.854359
Higher RPS in liver	6	12056571	ENSSSCG00000002704	KARS1	4.13377	0	4.14099e-05	4.12875	4	0	0	4	0	0	0	0	Active	Active	281.6	125.44	1.07628	5.59503e-13
Higher RPS in liver	6	12223376	ENSSSCG00000047099	Unknown	3.51589	0	1.68717e-05	3.5125	3	0	0	3	0	0	0	0	Active	Active	1.9	3.28	-1.18841	0.000352872
Higher RPS in liver	6	12223747	ENSSSCG00000033842	CFDP1	3.51589	0	1.68717e-05	3.5125	3	0	0	3	0	0	0	0	Active	Active	182.17	113.98	0.667504	0.000230616
Higher RPS in liver	6	12412778	ENSSSCG00000023012	CTRB1	20.9268	15.8153	5.30333e-08	5.1125	14	8	1	5	10	0	4	6	Inactive	Inactive	0.13	0.02	-	-
Higher RPS in liver	6	12412970	ENSSSCG00000030698	Unknown	20.9268	15.8153	5.30333e-08	5.1125	14	8	1	5	10	0	4	6	Inactive	Inactive	0.04	0	-	-
Higher RPS in liver	6	12421030	ENSSSCG00000023127	CTRB1	20.1879	16.4565	1.42572e-06	3.73125	13	7	2	4	10	0	4	6	Inactive	Inactive	0.87	2.82	-1.43448	8.26123e-05
Higher RPS in liver	6	12924894	ENSSSCG00000002716	MLKL	15.9782	9.38499	6.43107e-06	6.595	12	0	3	9	6	0	3	3	Active	Active	13.81	4.37	1.67822	9.25341e-15
Higher RPS in liver	6	12952350	ENSSSCG00000002715	RFWD3	7.93387	0	1.31936e-10	7.9275	6	0	0	6	0	0	0	0	Active	Active	22.67	5.98	1.79548	6.08071e-11
Higher RPS in liver	6	13011860	ENSSSCG00000030420	GLG1	35.7673	29.8762	1.42494e-06	5.88875	24	0	4	20	19	0	11	8	Active	Active	84.67	111.14	-0.419861	0.0319238
Higher RPS in liver	6	13187424	ENSSSCG00000002724	PDPR	22.4532	18.1395	3.89113e-08	4.315	14	0	0	14	11	0	4	7	Active	Active	16.43	26.73	-0.738791	4.81688e-07
Higher RPS in liver	6	13419314	ENSSSCG00000038843	ST3GAL2	16.6555	8.90999	2.8135e-08	7.7475	10	0	0	10	5	0	5	0	Active	Inactive	10.38	9.2	0.154755	0.525573
Higher RPS in liver	6	13471833	ENSSSCG00000025425	FCSK	8.68306	4.79345	3.97615e-06	3.89125	6	0	0	6	3	3	0	0	Active	Active	18.17	10.32	0.666766	0.0185956
Higher RPS in liver	6	14616481	ENSSSCG00000002734	MARVELD3	3.98865	0	5.63733e-10	3.9825	3	0	0	3	0	0	0	0	Active	Active	7.89	0.02	9.72208	3.83333e-19
Higher RPS in liver	6	14998263	ENSSSCG00000025218	TXNL4B	22.3181	11.1946	9.61165e-09	11.125	15	0	2	13	7	0	0	7	Active	Active	39.09	20.99	0.984951	1.70711e-10
Higher RPS in liver	6	14998292	ENSSSCG00000002748	DHX38	22.3181	11.1946	9.61165e-09	11.125	15	0	2	13	7	0	0	7	Active	Active	14.21	9.33	0.590525	0.000367291
Higher RPS in liver	6	16023169	ENSSSCG00000002752	ZFHX3	14.8929	0	7.35779e-09	14.8887	11	0	1	10	0	0	0	0	Inactive	Inactive	3.5	3.15	0.21486	0.534074
Higher RPS in liver	6	17227926	ENSSSCG00000022609	WWP2	6.83458	0.984347	1.17208e-06	5.85	5	0	0	5	1	0	0	1	Active	Active	43.72	15.34	1.21265	1.96219e-06
Higher RPS in liver	6	17434926	ENSSSCG00000002755	NFAT5	5.81831	1.56307	1.53659e-05	4.255	5	0	0	5	1	0	1	0	Active	Active	26.74	39.72	-0.552217	0.00976609
Higher RPS in liver	6	17774512	ENSSSCG00000028109	SNTB2	11.51	4.8002	2.63672e-10	6.71	8	0	1	7	3	0	0	3	Active	Active	16.88	8.48	1.0678	1.19206e-07
Higher RPS in liver	6	17818162	ENSSSCG00000028638	UTP4	11.0607	3.09936	2.6382e-11	7.96125	8	0	0	8	2	0	0	2	Active	Active	34.16	27.56	0.325674	0.193609
Higher RPS in liver	6	17794226	ENSSSCG00000018018	Unknown	12.2348	6.69868	1.91024e-08	5.53375	8	0	0	8	4	0	0	4	Inactive	Inactive	2.36	1.92	0.450191	0.466414
Higher RPS in liver	6	17818198	ENSSSCG00000034165	DERPC	11.0607	3.09936	2.6382e-11	7.96125	8	0	0	8	2	0	0	2	Active	Active	68.05	47.69	0.405932	0.0572764
Higher RPS in liver	6	17818480	ENSSSCG00000048110	Unknown	11.0607	3.09936	2.6382e-11	7.96125	8	0	0	8	2	0	0	2	Active	Active	4.72	5.03	-0.070514	0.856882
Higher RPS in liver	6	17853011	ENSSSCG00000049263	HAS3	15.2261	11.0943	1.47873e-06	4.13375	11	0	0	11	7	0	0	7	Inactive	Inactive	0	0	-	-
Higher RPS in liver	6	18155986	ENSSSCG00000025652	CDH1	3.17901	0	3.54093e-09	3.17375	2	0	0	2	0	0	0	0	Active	Active	165.46	4	5.28429	2.8085e-82
Higher RPS in liver	6	20266552	ENSSSCG00000026505	SETD6	19.729	10.145	5.57112e-11	9.58625	14	5	4	5	7	0	6	1	Active	Active	19.15	19.21	0.0333566	0.885405
Higher RPS in liver	6	20401684	ENSSSCG00000040881	SLC38A7	6.52769	0	1.61698e-09	6.5225	5	0	2	3	0	0	0	0	Active	Active	9.29	23.16	-1.39087	1.34543e-12
Higher RPS in liver	6	27308141	ENSSSCG00000038151	CMTM3	7.77802	4.4108	9.88892e-07	3.3675	6	0	3	3	3	0	1	2	Active	Active	25.58	10.59	1.22197	2.773e-10
Higher RPS in liver	6	27684030	ENSSSCG00000033811	CBFB	16.863	7.21676	1.93648e-08	9.645	12	0	2	10	5	0	1	4	Active	Active	77.44	13.86	2.43675	6.37444e-33
Higher RPS in liver	6	27795361	ENSSSCG00000040139	B3GNT9	25.7645	17.493	6.189e-08	8.27	17	8	0	9	11	0	6	5	Active	Active	8.72	2.67	1.70028	6.57741e-17
Higher RPS in liver	6	27804423	ENSSSCG00000036321	TRADD	24.6873	13.7713	9.90826e-09	10.915	17	7	0	10	9	0	5	4	Active	Active	9.17	6.52	0.417318	0.03203
Higher RPS in liver	6	27803571	ENSSSCG00000002793	AC074143.1	24.6873	13.7713	9.90826e-09	10.915	17	7	0	10	9	0	5	4	Active	Active	2.11	1.26	0.655479	0.133055
Higher RPS in liver	6	27808652	ENSSSCG00000002792	HSF4	22.7761	11.6394	9.80453e-10	11.1375	16	7	0	9	8	0	5	3	Active	Active	2.67	1.62	0.755461	0.055666
Higher RPS in liver	6	27809430	ENSSSCG00000040125	NOL3	22.7761	11.6394	9.80453e-10	11.1375	16	7	0	9	8	0	5	3	Active	Active	4.69	3.47	0.505376	0.110112
Higher RPS in liver	6	27832157	ENSSSCG00000032443	KIAA0895L	9.07562	2.81447	3.79569e-08	6.26125	7	3	0	4	2	0	2	0	Active	Active	1.97	10.89	-2.45283	2.63492e-48
Higher RPS in liver	6	27832452	ENSSSCG00000002788	EXOC3L1	9.07562	2.81447	3.79569e-08	6.26125	7	3	0	4	2	0	2	0	Active	Active	3.16	0.61	2.21346	3.56144e-14
Higher RPS in liver	6	27833924	ENSSSCG00000002787	E2F4	9.07562	2.81447	3.79569e-08	6.26125	7	3	0	4	2	0	2	0	Active	Active	23.67	21.55	0.0578948	0.826097
Higher RPS in liver	6	27841624	ENSSSCG00000002786	ELMO3	5.18211	0	4.90184e-06	5.17625	5	2	0	3	0	0	0	0	Active	Inactive	17.08	0.66	4.51933	4.48387e-24
Higher RPS in liver	6	28280405	ENSSSCG00000029590	ACD	8.99196	5.36887	5.83778e-05	3.62	7	0	2	5	4	0	0	4	Active	Active	7.42	4.62	0.517081	0.0622306
Higher RPS in liver	6	28280502	ENSSSCG00000034863	PARD6A	8.99196	5.36887	5.83778e-05	3.62	7	0	2	5	4	0	0	4	Active	Active	0.84	11.58	-4.10385	1.13182e-49
Higher RPS in liver	6	28287184	ENSSSCG00000028661	ENKD1	12.683	4.63225	2.96414e-07	8.0525	10	0	5	5	3	0	1	2	Active	Active	0.51	3.09	-2.65924	3.26339e-11
Higher RPS in liver	6	28287414	ENSSSCG00000021711	C16ORF86	12.683	4.63225	2.96414e-07	8.0525	10	0	5	5	3	0	1	2	Active	Active	0	0.04	-	-
Higher RPS in liver	6	28428814	ENSSSCG00000021803	RANBP10	6.68244	1.41509	2.51409e-09	5.26625	5	0	1	4	1	0	0	1	Active	Active	17.3	20.41	-0.262172	0.112897
Higher RPS in liver	6	28428883	ENSSSCG00000002767	TSNAXIP1	6.68244	1.41509	2.51409e-09	5.26625	5	0	1	4	1	0	0	1	Active	Active	0.72	20.11	-4.69981	2.45283e-35
Higher RPS in liver	6	28542773	ENSSSCG00000023849	CTRL	10.4157	7.03584	1.16114e-08	3.38125	7	0	0	7	5	0	0	5	Inactive	Inactive	0	0.19	-	-
Higher RPS in liver	6	28553567	ENSSSCG00000028350	LCAT	3.7438	0	1.1381e-09	3.73875	3	0	0	3	0	0	0	0	Active	Active	227.04	2.57	6.15879	1.61318e-66
Higher RPS in liver	6	28587643	ENSSSCG00000023514	DPEP3	3.84438	0	1.48724e-07	3.8375	3	0	0	3	0	0	0	0	Active	Active	1.01	1.37	-0.520635	0.150693
Higher RPS in liver	6	28612141	ENSSSCG00000042073	DPEP2NB	4.72125	0	6.74516e-08	4.7175	4	0	1	3	0	0	0	0	Inactive	Inactive	0.01	0.09	-	-
Higher RPS in liver	6	28617335	ENSSSCG00000026038	DDX28	5.49131	1.47907	4.0547e-10	4.01	4	0	0	4	1	0	0	1	Active	Active	17.09	5.58	1.52618	1.01409e-09
Higher RPS in liver	6	28617445	ENSSSCG00000029578	NFATC3	5.49131	1.47907	4.0547e-10	4.01	4	0	0	4	1	0	0	1	Active	Active	36.13	35.5	0.0143054	0.94198
Higher RPS in liver	6	28838444	ENSSSCG00000044005	Unknown	14.1213	0	1.05339e-06	14.1137	12	0	0	12	0	0	0	0	Inactive	Inactive	0.93	3.1	-1.57439	1.58511e-06
Higher RPS in liver	6	29842819	ENSSSCG00000034721	CES5A	3.5161	0	0.000590168	3.51125	3	1	0	2	0	0	0	0	Inactive	Inactive	1.78	2.45	-0.370586	0.629703
Higher RPS in liver	6	32083692	ENSSSCG00000043977	COX6B1	4.21649	0	6.8162e-11	4.2125	3	0	0	3	0	0	0	0	Active	Inactive	0.63	1.24	-1.08864	0.00559995
Higher RPS in liver	6	38029572	ENSSSCG00000002849	SHCBP1	7.5293	3.19271	7.22366e-08	4.335	6	0	1	5	2	0	0	2	Inactive	Inactive	59.48	1.18	5.60411	4.3011e-07
Higher RPS in liver	6	41423751	ENSSSCG00000025214	TSHZ3	4.4714	0	2.10964e-09	4.4675	3	0	0	3	0	0	0	0	Active	Active	0.46	14.36	-5.03702	1.85927e-99
Higher RPS in liver	6	43017555	ENSSSCG00000002864	SLC7A10	9.7576	5.68067	4.40941e-07	4.07625	7	2	1	4	4	0	0	4	Active	Active	0.57	25.23	-5.85502	3.08475e-74
Higher RPS in liver	6	43164918	ENSSSCG00000002867	CEBPG	6.11144	1.39224	3.89962e-05	4.72	5	0	0	5	1	0	0	1	Active	Active	76.69	18.76	2.03836	1.53608e-10
Higher RPS in liver	6	43529806	ENSSSCG00000033695	KCTD15	39.3219	29.9824	9.17047e-07	9.3375	27	0	6	21	21	0	2	19	Active	Active	14.45	25.67	-0.739152	0.00732998
Higher RPS in liver	6	44663234	ENSSSCG00000025126	LGI4	9.7661	3.02632	1.685e-07	6.74125	7	0	4	3	2	0	0	2	Active	Active	1.11	25.61	-4.54656	7.16109e-45
Higher RPS in liver	6	44667801	ENSSSCG00000021374	FXYD1	12.15	3.01958	3.47665e-11	9.12875	8	0	4	4	2	0	0	2	Active	Active	163.45	51.32	1.25383	2.93783e-05
Higher RPS in liver	6	44682153	ENSSSCG00000025499	Unknown	6.85729	0	1.56369e-07	6.85375	5	0	4	1	0	0	0	0	Active	Active	10.23	5.43	0.912365	9.22571e-06
Higher RPS in liver	6	44746906	ENSSSCG00000027989	FAM187B	5.46201	0	1.92423e-08	5.4575	4	0	1	3	0	0	0	0	Inactive	Inactive	0.92	0.36	1.19007	0.320642
Higher RPS in liver	6	44820683	ENSSSCG00000002893	CD22	13.2408	1.47164	3.69988e-11	11.7688	9	0	2	7	1	0	1	0	Active	Inactive	1.12	0.3	2.03405	2.68067e-07
Higher RPS in liver	6	44837096	ENSSSCG00000002891	GPR42	18.5388	15.0036	7.26764e-05	3.53625	11	0	3	8	10	0	7	3	Inactive	Inactive	0.28	0.02	-	-
Higher RPS in liver	6	44899336	ENSSSCG00000032438	FFAR2	7.65577	1.4539	3.09613e-10	6.20125	5	0	4	1	1	0	1	0	Inactive	Inactive	3.99	0.17	4.77069	1.39137e-13
Higher RPS in liver	6	45141895	ENSSSCG00000002908	ZBTB32	4.47372	1.39867	3.90083e-08	3.07125	3	0	0	3	1	0	0	1	Inactive	Inactive	0.12	0.06	-	-
Higher RPS in liver	6	45240442	ENSSSCG00000002913	PRODH2	15.9004	9.64109	2.12586e-09	6.25875	10	0	2	8	6	0	4	2	Active	Inactive	617.59	2.14	7.90098	2.10725e-188
Higher RPS in liver	6	45285698	ENSSSCG00000002916	APLP1	4.74108	1.59693	1.1356e-07	3.14625	3	0	0	3	1	0	0	1	Active	Active	0.99	398.96	-8.68376	2.7149e-152
Higher RPS in liver	6	45289826	ENSSSCG00000002918	HCST	4.74108	1.59693	1.1356e-07	3.14625	3	0	0	3	1	0	0	1	Inactive	Inactive	2.26	2.32	-0.00313677	0.994607
Higher RPS in liver	6	45473832	ENSSSCG00000042327	OVOL3	4	0	2.32658e-07	3.995	3	0	0	3	0	0	0	0	Inactive	Inactive	1.22	1.64	-0.635906	0.085416
Higher RPS in liver	6	46866257	ENSSSCG00000041806	Unknown	6.17603	0.79687	0.000772063	5.3775	7	0	0	7	1	0	0	1	Inactive	Inactive	0.01	0	-	-
Higher RPS in liver	6	47174091	ENSSSCG00000038077	PPP1R14A	6.46545	3.02773	2.75071e-05	3.44125	5	0	3	2	2	0	1	1	Active	Active	66.86	62.17	0.0623457	0.872813
Higher RPS in liver	6	47493882	ENSSSCG00000002965	ACTN4	4.09197	0	6.64869e-07	4.0875	3	0	0	3	0	0	0	0	Active	Active	61.18	65.71	-0.291597	0.24408
Higher RPS in liver	6	47578795	ENSSSCG00000002967	CAPN12	8.77646	4.1972	5.17843e-09	4.58125	6	0	2	4	3	0	0	3	Inactive	Inactive	0.52	1.11	-1.73434	0.0306674
Higher RPS in liver	6	47591374	ENSSSCG00000037879	LGALS7B	15.8896	12.8646	0.00029092	3.025	11	0	2	9	9	0	1	8	Active	Inactive	0.32	0.05	-	-
Higher RPS in liver	6	47612553	ENSSSCG00000024281	LGALS7B	5.82343	1.18952	6.8969e-06	4.635	5	0	2	3	1	0	0	1	Inactive	Inactive	0.1	0.01	-	-
Higher RPS in liver	6	47682121	ENSSSCG00000022692	RINL	6.96411	1.48456	9.17779e-08	5.48	5	0	0	5	1	0	0	1	Active	Inactive	3.2	5.2	-0.587244	0.0159409
Higher RPS in liver	6	47703529	ENSSSCG00000026794	SIRT2	8.75666	4.47608	3.79432e-07	4.28125	6	0	0	6	3	0	0	3	Active	Active	41.22	263.36	-2.88433	6.18943e-84
Higher RPS in liver	6	47703636	ENSSSCG00000026904	NFKBIB	8.75666	4.47608	3.79432e-07	4.28125	6	0	0	6	3	0	0	3	Active	Active	32.62	10.83	1.36075	3.77199e-08
Higher RPS in liver	6	47926785	ENSSSCG00000026407	NCCRP1	8.10878	5.09093	4.19952e-08	3.0175	5	0	0	5	3	0	0	3	Active	Active	0.71	0.83	-0.686041	0.345244
Higher RPS in liver	6	47951794	ENSSSCG00000040814	IL28B	11.9013	8.31008	0.0135131	3.5925	13	0	0	13	8	0	0	8	Inactive	Inactive	0	0.02	-	-
Higher RPS in liver	6	48406376	ENSSSCG00000039235	PSMC4	5.7099	1.46487	1.17763e-09	4.24625	4	0	1	3	1	0	0	1	Active	Active	118.22	46.15	1.2822	2.82425e-09
Higher RPS in liver	6	49000966	ENSSSCG00000041114	EGLN2	18.4128	14.6033	5.30868e-05	3.81	13	0	3	10	9	0	1	8	Active	Active	75.86	70.8	-0.0221297	0.936902
Higher RPS in liver	6	49031204	ENSSSCG00000002994	CYP2F1	5.88007	0	2.20864e-11	5.875	4	0	0	4	0	0	0	0	Inactive	Inactive	0.03	0	-	-
Higher RPS in liver	6	49410238	ENSSSCG00000032711	DMAC2	4.29609	0	4.15197e-09	4.29	3	0	2	1	0	0	0	0	Active	Active	25.54	55.91	-1.25663	1.4546e-07
Higher RPS in liver	6	49414734	ENSSSCG00000040022	ERICH4	4.29609	0	4.15197e-09	4.29	3	0	2	1	0	0	0	0	Inactive	Inactive	0.35	0.01	-	-
Higher RPS in liver	6	49437335	ENSSSCG00000020837	PSG9	18.6145	13.9876	1.36963e-06	4.625	11	0	4	7	8	0	6	2	Active	Inactive	32.05	1.85	4.18182	4.11635e-55
Higher RPS in liver	6	50158685	ENSSSCG00000024568	PSG9	3.93223	0	1.67591e-06	3.9275	3	0	0	3	0	0	0	0	Inactive	Inactive	11.77	0.2	6.21362	2.03793e-18
Higher RPS in liver	6	50184119	ENSSSCG00000037422	Unknown	13.6217	1.51265	2.35782e-08	12.1075	11	0	2	9	1	0	0	1	Inactive	Inactive	3.36	0.61	3.11508	0.0220837
Higher RPS in liver	6	50366240	ENSSSCG00000003062	LYPD3	6.4082	0	2.11157e-11	6.40375	4	0	3	1	0	0	0	0	Inactive	Inactive	1.94	0.12	3.54584	2.90499e-12
Higher RPS in liver	6	50373982	ENSSSCG00000003063	PHLDB3	11.2057	6.23181	1.66072e-07	4.975	7	0	5	2	4	0	0	4	Active	Active	3.14	0.7	2.14508	1.02572e-14
Higher RPS in liver	6	51359689	ENSSSCG00000003089	TOMM40	4.17954	0	1.41264e-07	4.17375	3	0	2	1	0	0	0	0	Active	Active	129.97	57.84	1.08744	0.00168917
Higher RPS in liver	6	51372259	ENSSSCG00000003088	APOE	7.41476	3.06673	3.5013e-07	4.3475	6	0	1	5	2	0	0	2	Active	Active	4529.33	183.35	4.3474	1.00744e-42
Higher RPS in liver	6	51400839	ENSSSCG00000003086	APOC2	5.57633	1.66684	1.76176e-09	3.90875	3	0	0	3	1	0	0	1	Active	Inactive	3635.76	1.37	11.1504	0
Higher RPS in liver	6	51866100	ENSSSCG00000037001	PPM1N	15.5457	9.76882	2.1614e-08	5.7775	10	0	1	9	6	0	1	5	Active	Active	0.62	2.88	-2.22212	6.66099e-10
Higher RPS in liver	6	51872812	ENSSSCG00000036317	VASP	11.8896	4.93865	5.804e-08	6.95125	8	0	1	7	3	0	1	2	Active	Active	55	12.75	2.03963	4.20838e-30
Higher RPS in liver	6	52536910	ENSSSCG00000022068	GNG8	11.3261	3.20839	2.16475e-09	8.12	8	0	2	6	2	0	0	2	Inactive	Active	2.72	17.32	-2.70946	5.88944e-06
Higher RPS in liver	6	53080282	ENSSSCG00000037986	INAFM1	7.11727	3.10566	6.99701e-09	4.01375	5	0	0	5	2	0	2	0	Active	Active	0.19	2.6	-3.69535	0.0013764
Higher RPS in liver	6	53188406	ENSSSCG00000003115	MEIS3	6.78693	2.86794	9.88101e-09	3.92	5	0	2	3	2	0	0	2	Active	Active	2.1	38.68	-4.33067	1.57583e-67
Higher RPS in liver	6	53423563	ENSSSCG00000023371	EHD2	14.5484	7.53215	1.49622e-08	7.015	10	0	0	10	5	0	0	5	Active	Active	3.59	3.67	0.0477172	0.887456
Higher RPS in liver	6	53968485	ENSSSCG00000025441	SPACA4	10.7101	5.27615	8.05121e-08	5.4325	8	0	1	7	4	0	1	3	Active	Inactive	0.17	0.06	-	-
Higher RPS in liver	6	54646574	ENSSSCG00000032668	PRR12	3.07199	0	4.1666e-06	3.06625	2	0	1	1	0	0	0	0	Active	Active	1.43	6.51	-2.13928	3.40889e-09
Higher RPS in liver	6	54880807	ENSSSCG00000003195	PNKP	6.07356	0	1.01529e-08	6.0675	4	0	0	4	0	0	0	0	Active	Active	24.4	6.84	1.65467	1.64206e-24
Higher RPS in liver	6	54889954	ENSSSCG00000003194	AKT1S1	4.62898	0	9.6798e-10	4.62375	3	0	0	3	0	0	0	0	Active	Active	22.74	16.08	0.215898	0.36705
Higher RPS in liver	6	54890019	ENSSSCG00000003193	TBC1D17	6.20709	0.364891	8.15806e-06	5.83875	4	0	0	4	1	0	0	1	Active	Active	21.12	16.21	0.107881	0.70753
Higher RPS in liver	6	55927280	ENSSSCG00000029785	RPS9	12.6164	6.39223	2.24404e-06	6.2275	10	0	0	10	5	0	1	4	Active	Active	2718.44	387.01	2.71092	1.08341e-32
Higher RPS in liver	6	55947109	ENSSSCG00000003268	TSEN34	5.97947	0	6.79988e-07	5.975	5	0	0	5	0	0	0	0	Inactive	Inactive	47.5	26.17	0.68244	0.00130008
Higher RPS in liver	6	55939450	ENSSSCG00000003267	MBOAT7	5.06533	0	1.60528e-06	5.06125	4	0	0	4	0	0	0	0	Active	Active	24.76	54.26	-1.2957	2.20587e-15
Higher RPS in liver	6	56028400	ENSSSCG00000003261	NDUFA3	17.2776	9.80955	1.49217e-06	7.4675	14	0	0	14	8	0	2	6	Active	Active	155.89	97.11	0.336971	0.153464
Higher RPS in liver	6	56021363	ENSSSCG00000003259	OSCAR	5.73702	1.44302	9.59231e-06	4.29625	5	0	0	5	1	0	0	1	Active	Active	2.76	4.53	-0.682371	0.00132473
Higher RPS in liver	6	56038524	ENSSSCG00000042091	TARM1	20.2624	12.6221	9.04516e-08	7.6375	16	0	0	16	10	0	1	9	Active	Inactive	2.13	0.01	6.73362	2.98832e-06
Higher RPS in liver	6	56648310	ENSSSCG00000039638	Unknown	4.45727	0.733201	0.00112748	3.72	4	0	0	4	1	0	0	1	Inactive	Inactive	0.5	1.02	-0.578442	0.713603
Higher RPS in liver	6	56709786	ENSSSCG00000042197	Unknown	7.09538	1.12082	9.04481e-05	5.97125	6	0	0	6	2	0	0	2	Inactive	Inactive	0	0	-	-
Higher RPS in liver	6	58632807	ENSSSCG00000036017	Unknown	30.005	22.4323	0.00319257	7.57125	25	0	2	23	18	0	6	12	Active	Inactive	0.43	0.02	-	-
Higher RPS in liver	6	59544896	ENSSSCG00000040725	IL11	4.18726	0	1.20724e-08	4.1825	3	0	0	3	0	0	0	0	Inactive	Active	0.24	0.05	-	-
Higher RPS in liver	6	60168340	ENSSSCG00000048710	Unknown	4.45876	0	9.39158e-05	4.45375	5	0	2	3	0	0	0	0	Inactive	Inactive	0.31	0.9	-1.45932	0.000355214
Higher RPS in liver	6	60520803	ENSSSCG00000037756	Unknown	16.5884	4.59375	0.000310876	11.9938	25	0	3	22	7	0	2	5	Inactive	Inactive	0.18	0	-	-
Higher RPS in liver	6	60523825	ENSSSCG00000042659	Unknown	16.5884	4.59375	0.000310876	11.9938	25	0	3	22	7	0	2	5	Inactive	Inactive	0	0	-	-
Higher RPS in liver	6	61624377	ENSSSCG00000035385	Unknown	43.1938	17.1846	2.72974e-05	26.0087	72	0	0	72	27	0	2	25	Active	Inactive	0.35	0.01	-	-
Higher RPS in liver	6	61695111	ENSSSCG00000034301	ZNF304	6.58097	1.13866	0.00124014	5.44	9	0	0	9	1	0	0	1	Active	Active	8.88	28.83	-1.74103	8.75544e-19
Higher RPS in liver	6	61869175	ENSSSCG00000047112	Unknown	18.8706	10.4701	0.00308121	8.39875	22	0	1	21	10	0	0	10	Active	Inactive	11.6	21.58	-0.684122	0.245329
Higher RPS in liver	6	62992517	ENSSSCG00000004004	ZNF584	14.5006	7.90972	9.76064e-07	6.5925	10	0	0	10	5	0	0	5	Active	Active	6.54	14.72	-1.26514	3.44222e-07
Higher RPS in liver	6	63043231	ENSSSCG00000031342	ZNF324	11.5185	3.2848	2.90278e-07	8.23375	8	0	0	8	2	0	0	2	Active	Active	6.82	10.3	-0.577873	0.101215
Higher RPS in liver	6	63048073	ENSSSCG00000039930	ZNF446	7.93166	1.6165	1.29694e-07	6.31375	6	0	0	6	1	0	0	1	Active	Inactive	6.16	7.36	-0.512821	0.00577946
Higher RPS in liver	6	63094648	ENSSSCG00000037920	TRIM28	10.9134	6.71935	7.70538e-06	4.19375	8	0	0	8	5	0	0	5	Active	Active	98.18	92.37	0.0279093	0.904253
Higher RPS in liver	6	63553332	ENSSSCG00000003333	C1QTNF12	3.03053	0	9.90597e-07	3.025	3	0	1	2	0	0	0	0	Active	Active	0.51	0.48	0.0442834	0.934903
Higher RPS in liver	6	63695170	ENSSSCG00000003344	VWA1	10.1446	3.12658	1.71926e-08	7.01875	7	0	2	5	2	0	2	0	Active	Active	3.05	20.85	-2.90361	3.54587e-42
Higher RPS in liver	6	63701460	ENSSSCG00000003343	ATAD3A	9.79051	0	5.67805e-09	9.785	7	0	2	5	0	0	0	0	Active	Active	35.1	9.06	2.00025	8.30591e-06
Higher RPS in liver	6	63787200	ENSSSCG00000003350	MIB2	3.72421	0	1.91153e-09	3.72	3	0	0	3	0	0	0	0	Active	Active	36.32	24.14	0.41041	0.0690732
Higher RPS in liver	6	67126639	ENSSSCG00000003369	RPL22	24.2316	14.7028	1.59369e-09	9.52875	17	0	7	10	9	0	0	9	Active	Active	2402.07	220.08	3.39789	1.04213e-83
Higher RPS in liver	6	67149674	ENSSSCG00000003371	GPR153	18.0141	12.8553	1.00846e-06	5.1575	12	0	7	5	8	0	0	8	Active	Active	4.13	3.31	0.0547219	0.914234
Higher RPS in liver	6	68629214	ENSSSCG00000003385	PARK7	8.08871	2.84319	1.70884e-07	5.24625	6	0	0	6	2	0	0	2	Active	Active	608.17	217	1.33617	4.27801e-13
Higher RPS in liver	6	68682624	ENSSSCG00000035774	ERRFI1	45.2694	22.7229	3.25092e-09	22.5463	30	0	7	23	14	0	6	8	Active	Active	47.77	10.2	1.65133	1.32155e-12
Higher RPS in liver	6	68933910	ENSSSCG00000003388	SLC45A1	33.12	26.541	8.91731e-07	6.57625	21	0	7	14	15	0	8	7	Inactive	Active	0.02	24.35	-12.4347	2.89027e-32
Higher RPS in liver	6	69973387	ENSSSCG00000003393	TMEM201	8.28318	4.09223	8.16008e-05	4.19125	6	0	1	5	4	0	2	2	Active	Active	3.32	12.44	-1.872	9.17813e-06
Higher RPS in liver	6	72256877	ENSSSCG00000003438	VPS13D	7.92953	4.25004	8.28281e-06	3.68125	6	0	2	4	3	0	3	0	Active	Active	13.65	41.08	-1.48484	7.17142e-09
Higher RPS in liver	6	72598815	ENSSSCG00000003439	DHRS3	52.2009	44.0628	6.85759e-08	8.1375	34	2	8	24	29	20	6	3	Active	Active	50.99	16.23	1.49395	2.15497e-09
Higher RPS in liver	6	72635281	ENSSSCG00000003440	AADACL4	21.3838	5.76916	4.20514e-10	15.6163	17	0	8	9	4	2	1	1	Inactive	Inactive	0.01	0.03	-	-
Higher RPS in liver	6	74226992	ENSSSCG00000043303	Unknown	18.1067	10.708	1.16501e-07	7.4	12	0	0	12	7	7	0	0	Inactive	Inactive	0.71	1.57	-1.13871	5.69885e-05
Higher RPS in liver	6	74434050	ENSSSCG00000021026	TMEM51	19.9507	13.9766	3.888e-07	5.975	13	0	7	6	9	0	7	2	Active	Active	32.26	7.67	1.98538	7.9433e-15
Higher RPS in liver	6	75335270	ENSSSCG00000003472	ARHGEF19	6.83055	1.49133	5.97956e-10	5.34	5	0	2	3	1	0	0	1	Active	Active	1.7	1.55	-0.124551	0.747052
Higher RPS in liver	6	75349943	ENSSSCG00000003473	CPLANE2	8.54264	3.20391	5.2435e-10	5.34125	6	0	3	3	2	0	0	2	Active	Active	2.12	7.51	-1.82424	6.4765e-06
Higher RPS in liver	6	75755892	ENSSSCG00000026478	PADI2	27.1153	18.101	9.112e-08	9.015	19	0	2	17	12	2	4	6	Active	Active	1.36	37.55	-4.68218	1.02639e-24
Higher RPS in liver	6	76064311	ENSSSCG00000003486	ARHGEF10L	12.3491	7.80874	3.99188e-07	4.53875	9	0	3	6	5	0	0	5	Inactive	Inactive	54.49	29.57	0.690637	0.000515677
Higher RPS in liver	6	78241599	ENSSSCG00000039652	OTUD3	9.845	4.28568	2.49165e-05	5.56	8	0	0	8	3	0	2	1	Active	Active	6.71	28.3	-2.08271	5.88649e-26
Higher RPS in liver	6	80137952	ENSSSCG00000003521	WNT4	25.4001	12.4368	6.26413e-08	12.9625	19	4	4	11	9	6	1	2	Active	Active	2.71	9.15	-1.79275	7.44877e-05
Higher RPS in liver	6	80903496	ENSSSCG00000003531	KDM1A	11.4769	5.86797	4.16661e-07	5.61	9	0	4	5	4	0	1	3	Active	Active	48.56	57.77	-0.306887	0.0399975
Higher RPS in liver	6	81885589	ENSSSCG00000038848	IL22RA1	5.09677	1.43646	7.17418e-09	3.65875	4	2	0	2	1	1	0	0	Active	Inactive	11.2	0.02	10.2483	2.82874e-20
Higher RPS in liver	6	82672445	ENSSSCG00000037664	Unknown	8.52706	0	3.50747e-09	8.5225	7	0	3	4	0	0	0	0	Inactive	Inactive	0.23	2.58	-3.6221	8.32296e-05
Higher RPS in liver	6	83030701	ENSSSCG00000003549	LDLRAP1	18.3594	3.8564	3.61601e-10	14.5038	14	4	1	9	3	3	0	0	Active	Active	23.26	3.59	2.68269	6.83835e-26
Higher RPS in liver	6	83089072	ENSSSCG00000023235	MAN1C1	27.2029	13.4496	6.9222e-09	13.7538	20	10	1	9	9	9	0	0	Active	Active	64.6	12.46	2.20633	5.80046e-42
Higher RPS in liver	6	83246934	ENSSSCG00000003554	AL020996.2	60.3879	41.9784	1.04508e-09	18.4088	42	0	12	30	27	2	15	10	Active	Active	12.32	34.1	-1.60817	4.98887e-18
Higher RPS in liver	6	83265420	ENSSSCG00000003553	MTFR1L	4.89366	1.29927	1.2932e-06	3.595	4	0	2	2	1	0	1	0	Active	Active	32.86	38.93	-0.331256	0.0355725
Higher RPS in liver	6	83905076	ENSSSCG00000003558	RPS6KA1	3.82186	0	3.87673e-10	3.8175	3	0	0	3	0	0	0	0	Active	Active	25.94	8.18	1.62874	5.83075e-19
Higher RPS in liver	6	84129965	ENSSSCG00000040007	PIGV	46.0814	29.7246	9.32698e-10	16.3575	30	0	7	23	18	0	7	11	Active	Active	29.56	12.87	1.03649	7.65384e-05
Higher RPS in liver	6	84153717	ENSSSCG00000003561	ZDHHC18	21.2783	9.19241	1.88098e-10	12.0887	15	0	4	11	6	0	4	2	Active	Active	6.49	13.74	-1.14446	2.904e-07
Higher RPS in liver	6	84426997	ENSSSCG00000003569	SLC9A1	3.14586	0	1.91094e-08	3.14	2	0	2	0	0	0	0	0	Active	Active	1.77	13.56	-2.90724	3.61818e-22
Higher RPS in liver	6	84585391	ENSSSCG00000003573	MAP3K6	6.40156	1.30506	4.52512e-11	5.09875	4	0	0	4	1	0	0	1	Active	Active	3	1.15	1.21386	4.72677e-07
Higher RPS in liver	6	85324228	ENSSSCG00000029438	SESN2	6.00233	2.91352	1.7663e-05	3.09	5	0	0	5	2	0	2	0	Active	Inactive	10.06	7.97	0.070194	NA
Higher RPS in liver	6	85384080	ENSSSCG00000044404	MED18	5.67321	1.58776	2.80563e-08	4.08375	4	1	0	3	1	0	0	1	Active	Active	30.9	13.81	1.0892	4.75582e-09
Higher RPS in liver	6	85842605	ENSSSCG00000003586	EPB41	34.4359	23.6705	4.14826e-07	10.765	24	0	2	22	15	0	4	11	Active	Active	71.75	11.41	2.58908	1.14116e-30
Higher RPS in liver	6	86137737	ENSSSCG00000003590	PTPRU	11.5745	7.75493	1.13095e-06	3.82	9	0	0	9	5	0	5	0	Active	Active	2.77	15.46	-2.28128	3.12703e-11
Higher RPS in liver	6	86305250	ENSSSCG00000049560	Unknown	4.9274	1.31402	1.3714e-05	3.6125	4	0	0	4	1	0	0	1	Inactive	Inactive	0	0	-	-
Higher RPS in liver	6	88349963	ENSSSCG00000003606	SPOCD1	19.9285	5.67428	6.70182e-10	14.2538	15	0	5	10	4	0	2	2	Active	Inactive	0.04	0	-	-
Higher RPS in liver	6	91031849	ENSSSCG00000038677	GJB3	8.82533	0	2.80854e-09	8.81875	6	0	0	6	0	0	0	0	Active	Active	2.3	0.35	2.04014	0.00179122
Higher RPS in liver	6	91045393	ENSSSCG00000039983	GJA4	9.89646	0	4.08429e-09	9.89125	7	0	0	7	0	0	0	0	Active	Active	27.53	3.83	2.5023	2.81309e-13
Higher RPS in liver	6	94960457	ENSSSCG00000003654	MACF1	6.45041	0	3.71874e-10	6.445	5	0	3	2	0	0	0	0	Active	Active	72.83	166.66	-1.06874	4.1744e-10
Higher RPS in liver	6	95312977	ENSSSCG00000036451	Unknown	3.37778	0	1.87684e-06	3.37125	3	0	1	2	0	0	0	0	Inactive	Inactive	56.3	28.65	1.00542	0.00788004
Higher RPS in liver	6	95322453	ENSSSCG00000032082	BMP8B	7.79809	2.78906	1.88617e-06	5.01	6	0	5	1	2	0	2	0	Active	Active	0.28	0.76	-1.4476	0.007718
Higher RPS in liver	6	95599055	ENSSSCG00000037514	BMP8B	21.5259	13.2514	1.22555e-05	8.27625	15	0	0	15	8	0	5	3	Active	Active	4.68	6.53	-0.938523	0.00463555
Higher RPS in liver	6	95683805	ENSSSCG00000003667	TRIT1	4.02514	0	3.08391e-09	4.02	3	0	2	1	0	0	0	0	Active	Active	34.75	66.13	-0.904245	1.06785e-05
Higher RPS in liver	6	95860837	ENSSSCG00000036673	PPT1	9.17935	6.03488	6.28285e-09	3.14625	7	0	0	7	4	0	0	4	Active	Active	109.96	153.97	-0.56168	0.0422905
Higher RPS in liver	6	96323339	ENSSSCG00000028411	MC5R	13.4624	6.77385	9.64599e-09	6.69125	10	0	1	9	5	0	0	5	Inactive	Inactive	0.16	0.54	-2.31465	0.130388
Higher RPS in liver	6	96588652	ENSSSCG00000042818	Unknown	28.5938	15.7551	8.93122e-09	12.84	20	1	10	9	10	0	2	8	Inactive	Inactive	0.67	2.17	-1.40472	0.000122651
Higher RPS in liver	6	96733799	ENSSSCG00000003673	CEP192	16.2304	10.1138	9.30288e-09	6.11625	11	6	0	5	7	0	2	5	Active	Active	96.41	38.19	1.24371	1.00296e-22
Higher RPS in liver	6	96770251	ENSSSCG00000021738	PTPN2	21.6617	3.00766	5.45933e-09	18.655	15	12	0	3	2	0	2	0	Active	Active	19.04	6.75	1.48253	1.60249e-27
Higher RPS in liver	6	96849912	ENSSSCG00000044092	Unknown	14.8621	4.03766	2.77797e-11	10.8225	10	0	1	9	3	0	1	2	Inactive	Inactive	0.56	2.32	-1.9686	6.33345e-10
Higher RPS in liver	6	96893474	ENSSSCG00000031730	PSMG2	17.7471	6.81571	2.00179e-09	10.9313	13	0	3	10	5	0	0	5	Active	Active	51.45	14.14	1.85774	1.69429e-11
Higher RPS in liver	6	96893571	ENSSSCG00000027007	CEP76	17.7471	6.81571	2.00179e-09	10.9313	13	0	3	10	5	0	0	5	Active	Active	11.4	8.41	0.387	0.00575604
Higher RPS in liver	6	100092938	ENSSSCG00000028805	PTPRM	10.343	7.18561	1.16288e-06	3.1575	8	0	6	2	5	0	2	3	Active	Active	30.57	35.3	-0.199897	0.197977
Higher RPS in liver	6	105150008	ENSSSCG00000050802	Unknown	30.293	24.4616	0.000395553	5.83	21	0	0	21	16	0	0	16	Inactive	Inactive	0.12	0.89	-3.16441	7.93675e-08
Higher RPS in liver	6	108450990	ENSSSCG00000003707	NPC1	10.6078	6.42841	9.50456e-08	4.1775	7	0	2	5	4	0	3	1	Active	Active	16.01	41.71	-1.40287	1.20565e-08
Higher RPS in liver	6	108860322	ENSSSCG00000003710	TTC39C	7.23031	1.3426	5.68942e-07	5.8875	6	1	5	0	1	0	1	0	Active	Active	98.31	15.03	2.69334	1.26132e-23
Higher RPS in liver	6	108909974	ENSSSCG00000003711	CABYR	12.2819	0	1.3326e-09	12.275	9	8	0	1	0	0	0	0	Inactive	Inactive	14.72	7.29	1.0075	0.000796734
Higher RPS in liver	6	112628432	ENSSSCG00000003722	CDH2	22.8837	17.5568	6.95395e-07	5.325	16	13	1	2	12	9	2	1	Active	Active	87.23	88.21	-0.145385	0.700294
Higher RPS in liver	6	115400252	ENSSSCG00000022739	DSG2	5.71425	2.62117	4.9743e-09	3.0925	4	0	0	4	2	0	0	2	Active	Active	70.37	2.39	4.77582	1.42094e-78
Higher RPS in liver	6	115592726	ENSSSCG00000025005	B4GALT6	7.57963	4.00971	2.98589e-05	3.57125	6	0	0	6	3	0	0	3	Active	Active	10.19	68.13	-2.79611	1.22242e-28
Higher RPS in liver	6	115786634	ENSSSCG00000003728	TRAPPC8	21.7299	14.4659	2.71575e-09	7.26125	16	4	2	10	10	0	0	10	Active	Active	80.66	46.86	0.76359	6.67012e-06
Higher RPS in liver	6	115926774	ENSSSCG00000003730	RNF138	8.43981	4.39095	2.02759e-07	4.0475	7	4	0	3	3	0	0	3	Active	Active	48.76	13.51	1.85757	1.13028e-10
Higher RPS in liver	6	116325331	ENSSSCG00000003731	GAREM1	23.5751	8.94238	1.06524e-09	14.6337	18	0	6	12	6	0	3	3	Active	Active	17.02	17.06	0.0172986	0.932663
Higher RPS in liver	6	116113899	ENSSSCG00000050585	Unknown	20.4222	8.51952	1.8615e-07	11.9038	16	0	4	12	6	0	0	6	Inactive	Inactive	1.04	1.6	-0.537416	0.162618
Higher RPS in liver	6	119885463	ENSSSCG00000020898	ELP2	4.11337	0	1.74771e-09	4.10875	3	0	0	3	0	0	0	0	Active	Active	48.67	42.81	0.273211	0.106408
Higher RPS in liver	6	127960195	ENSSSCG00000005778	HSBP1L1	8.16333	5.07655	0.000244729	3.085	6	0	4	2	3	0	3	0	Active	Active	4.33	8.81	-1.09469	0.00412346
Higher RPS in liver	6	134680050	ENSSSCG00000027660	IFI44L	14.6944	10.4498	5.49726e-06	4.2425	11	0	0	11	7	0	0	7	Inactive	Inactive	232.06	66.2	1.92248	0.0733323
Higher RPS in liver	6	142642073	ENSSSCG00000003791	SRSF11	10.3219	6.67454	0.000137826	3.64625	8	0	4	4	5	0	3	2	Inactive	Inactive	216.02	101.42	1.10971	1.25552e-07
Higher RPS in liver	6	144944249	ENSSSCG00000037066	GADD45A	38.5425	16.0146	9.69061e-12	22.5275	26	0	11	15	11	0	8	3	Active	Active	78.75	2.95	4.5548	3.47207e-44
Higher RPS in liver	6	145814231	ENSSSCG00000031352	TCTEX1D1	3.67405	0	6.33566e-08	3.66875	3	0	0	3	0	0	0	0	Active	Active	0.49	1.54	-1.40536	6.09227e-05
Higher RPS in liver	6	146153373	ENSSSCG00000042830	Unknown	10.09	1.32354	5.551e-09	8.765	8	0	3	5	1	0	0	1	Inactive	Inactive	0.8	1.45	-0.789798	0.00948763
Higher RPS in liver	6	147429106	ENSSSCG00000003809	JAK1	14.1129	1.33745	2.47854e-10	12.7788	11	0	10	1	1	0	0	1	Active	Active	132.8	93.03	0.501686	0.000240155
Higher RPS in liver	6	147722429	ENSSSCG00000025672	RAVER2	7.48055	2.36449	0.00109263	5.1175	9	0	0	9	3	1	0	2	Active	Active	2.47	33.46	-3.53412	1.45993e-21
Higher RPS in liver	6	149845831	ENSSSCG00000003819	ANGPTL3	8.12426	0	1.74445e-09	8.12	6	0	6	0	0	0	0	0	Active	Inactive	770.29	0.46	10.5344	3.43211e-115
Higher RPS in liver	6	151236883	ENSSSCG00000033042	Unknown	14.703	0	4.03175e-09	14.6975	12	4	1	7	0	0	0	0	Inactive	Inactive	0.23	0	-	-
Higher RPS in liver	6	155530472	ENSSSCG00000003835	C8A	10.1328	0	1.04515e-06	10.1263	8	0	1	7	0	0	0	0	Active	Inactive	1470.76	0.05	15.0995	1.47848e-29
Higher RPS in liver	6	155477131	ENSSSCG00000038041	FYB2	6.93366	0	1.02699e-08	6.93	5	0	2	3	0	0	0	0	Inactive	Inactive	16.46	1.18	3.79182	2.22437e-40
Higher RPS in liver	6	155801012	ENSSSCG00000003839	PLPP3	30.026	22.7513	1.6182e-06	7.27375	22	12	0	10	16	0	4	12	Active	Active	144.42	248.21	-0.836075	7.04068e-06
Higher RPS in liver	6	157552413	ENSSSCG00000027362	LEXM	14.6742	7.84866	1.47903e-08	6.82625	10	0	0	10	5	0	4	1	Inactive	Inactive	0.83	1.28	-0.441705	0.384197
Higher RPS in liver	6	159061327	ENSSSCG00000003851	CPT2	10.6187	1.5679	6.34806e-08	9.05125	8	5	0	3	1	0	0	1	Active	Active	142.83	8.61	3.97609	3.5956e-50
Higher RPS in liver	6	164469662	ENSSSCG00000024129	CYP4X1	12.916	9.45915	0.00956437	3.45375	10	0	4	6	7	0	0	7	Inactive	Active	0.11	5.25	-6.2767	9.4835e-18
Higher RPS in liver	6	164484185	ENSSSCG00000003892	Unknown	17.0397	10.4822	0.000501605	6.5575	14	0	6	8	8	0	0	8	Inactive	Inactive	7.62	0.02	9.41166	0.0105139
Higher RPS in liver	6	164496805	ENSSSCG00000003891	CYP4A24	43.5903	38.0794	0.00139943	5.51125	27	0	8	19	23	0	2	21	Active	Inactive	149.97	0.08	10.6462	7.93484e-20
Higher RPS in liver	6	164646254	ENSSSCG00000003889	Unknown	26.2995	16.3877	0.0326559	9.9125	34	0	7	27	18	0	3	15	Active	Inactive	5.95	0	9.94687	3.58971e-06
Higher RPS in liver	6	164737552	ENSSSCG00000003894	CYP4B1	4.80147	1.26595	3.38371e-06	3.535	5	0	1	4	1	0	0	1	Inactive	Inactive	1.25	0	7.86735	4.22268e-08
Higher RPS in liver	6	164777980	ENSSSCG00000003895	EFCAB14	9.4023	0	4.55059e-09	9.39625	7	0	1	6	0	0	0	0	Active	Active	29.15	37.21	-0.426792	0.00446615
Higher RPS in liver	6	165212833	ENSSSCG00000029145	POMGNT1	10.1489	4.51798	4.53435e-09	5.6325	7	0	0	7	3	3	0	0	Active	Active	48.99	72.21	-0.602068	0.000208157
Higher RPS in liver	6	165235150	ENSSSCG00000003908	TSPAN1	22.6156	12.7201	1.08324e-08	9.895	16	0	0	16	8	5	0	3	Active	Active	6.35	0.92	3.34574	NA
Higher RPS in liver	6	165232844	ENSSSCG00000050383	P3R3URF	29.0964	20.2142	9.23197e-09	8.8825	19	0	0	19	12	8	2	2	Inactive	Inactive	0.01	0.05	-	-
Higher RPS in liver	6	165874180	ENSSSCG00000003917	TESK2	18.4814	15.1442	8.06296e-05	3.33875	11	0	4	7	9	0	5	4	Active	Active	20.64	6.86	1.29313	0.00256552
Higher RPS in liver	6	166003335	ENSSSCG00000003919	AL451136.1	7.74652	4.41704	1.70383e-07	3.33125	6	0	1	5	3	0	0	3	Active	Active	17.53	5.88	1.58571	1.02702e-06
Higher RPS in liver	6	167809093	ENSSSCG00000003940	HYI	5.39505	0	3.37283e-09	5.38875	4	0	0	4	0	0	0	0	Active	Active	202.53	4.17	5.3098	7.47564e-53
Higher RPS in liver	6	167861307	ENSSSCG00000003941	SZT2	14.7571	9.7162	3.75416e-07	5.04125	10	0	0	10	6	0	3	3	Active	Active	4.8	15.31	-1.77323	3.83649e-10
Higher RPS in liver	6	167860983	ENSSSCG00000003943	MED8	14.7571	9.7162	3.75416e-07	5.04125	10	0	0	10	6	0	3	3	Active	Active	307.21	36.43	3.02612	2.55973e-64
Higher RPS in liver	6	167881352	ENSSSCG00000035238	ELOVL1	14.413	7.65005	9.77089e-08	6.7625	10	0	0	10	5	0	2	3	Active	Active	55.86	52.94	-0.0118089	0.965366
[truncated: 4,479 more rows]

## Sheet: Sheet 4 (muscle vs. brain)
Genes with differential RPS between muscle and brain	Chromosome	TSS position	Gene Ensembl ID	Gene symbol	Mean RPS in muscle	Mean RPS in brain	P-value of RPS	ΔRPS (muscle – brain)	Enhancer number of gene in muscle				Enhancer number of gene in brain				Promoter type in muscle	Promoter type in brain	Mean TPM of muscle	Mean TPM of brain	log2FC of expression (muscle / brain)	P-value of expression
[truncated: 4,781 more rows]

[truncated: 1 more sheets: ReadMe]
