# Supplementary material for: Haplotype-resolved 3D chromatin architecture of the hybrid pig
Source: HighWire-hosted journal article supplement (doi:10.1101/gr.278101.123), 2024-02-01
Supplement: Supplemental_Table_S8.xlsx [file Supplemental_Table_S8.xlsx]

## Sheet: Sheet1 (known imprinted genes)
Gene symbol	Gene type	Number of reported species	Human	Mouse	Pig	Cow	Macaque	Rat	Sheep	Wallaby	Lab_Opossum	Dog	Opossum	Platypus	Rabbit	Echidna	Chicken	Fish
H19	Nocoding RNA	9	Maternal	Maternal	Maternal	Maternal	Maternal	Maternal	Maternal	Maternal	Maternal	-	-	-	-	-	-	-
IGF2R	Protein coding	8	-	Maternal	Tissue Dependent	Maternal	-	Maternal	Maternal	-	Maternal	Maternal	Maternal	-	-	-	-	-
IGF2	Protein coding	8	Paternal	Paternal	Paternal	Paternal	-	Paternal	Paternal	Paternal	-	-	Paternal	-	-	-	-	-
PEG3	Protein coding	7	Paternal	Paternal	Paternal	Paternal	Paternal	Paternal	Paternal	-	-	-	-	-	-	-	-	-
MEST	Protein coding	7	Paternal	Paternal	Paternal	Paternal	-	-	Paternal	Paternal	Paternal	-	-	-	-	-	-	-
DLK1	Protein coding	7	Paternal	Paternal	Paternal	Paternal	Paternal	Paternal	Paternal	-	-	-	-	-	-	-	-	-
DIO3	Protein coding	6	Paternal	Paternal	Paternal	Paternal	-	Paternal	Paternal	-	-	-	-	-	-	-	-	-
PLAGL1	Protein coding	6	Paternal	Paternal	Paternal	Paternal	Paternal	-	Paternal	-	-	-	-	-	-	-	-	-
MAGEL2	Protein coding	5	Paternal	Paternal	Paternal	Paternal	Paternal	-	-	-	-	-	-	-	-	-	-	-
SNRPN	Protein coding	5	Paternal	Paternal	Paternal	Paternal	Paternal	-	-	-	-	-	-	-	-	-	-	-
CDKN1C	Protein coding	5	Maternal	Maternal	Maternal	Maternal	-	-	Maternal	-	-	-	-	-	-	-	-	-
PEG10	Protein coding	5	Paternal	Paternal	Paternal	Paternal	-	-	-	Paternal	-	-	-	-	-	-	-	-
RTL1	Protein coding	5	Paternal	Paternal	-	Paternal	-	Paternal	Paternal	-	-	-	-	-	-	-	-	-
NAP1L5	Protein coding	5	Paternal	Paternal	Paternal	Paternal	-	-	-	-	-	-	-	-	Paternal	-	-	-
PHLDA2	Protein coding	5	Maternal	Maternal	Maternal	Maternal	-	-	Maternal	-	-	-	-	-	-	-	-	-
GNAS	Protein coding	5	Isoform Dependent	Isoform Dependent	Maternal	Maternal	-	-	Maternal	-	-	-	-	-	-	-	-	-
NNAT	Protein coding	4	Paternal	Paternal	Paternal	Paternal	-	-	-	-	-	-	-	-	-	-	-	-
DIRAS3	Protein coding	4	Paternal	-	Paternal	Paternal	-	-	Paternal	-	-	-	-	-	-	-	-	-
RASGRF1	Protein coding	4	Paternal	Paternal	Tissue Dependent	-	-	Paternal	-	-	-	-	-	-	-	-	-	-
DIO3OS	Nocoding RNA	4	Maternal	Maternal	-	Maternal	-	Maternal	-	-	-	-	-	-	-	-	-	-
MKRN3	Protein coding	4	Paternal	Paternal	-	-	Paternal	-	-	-	-	-	-	-	Paternal	-	-	-
KCNQ1	Protein coding	4	Maternal	Maternal	Paternal	-	-	-	Maternal	-	-	-	-	-	-	-	-	-
SGCE	Protein coding	4	Paternal	Paternal	Paternal	Paternal	-	-	-	-	-	-	-	-	-	-	-	-
PPP1R9A	Protein coding	4	Maternal	Maternal	Maternal	-	-	-	Maternal	-	-	-	-	-	-	-	-	-
NDN	Protein coding	4	Paternal	Paternal	Paternal	-	Paternal	-	-	-	-	-	-	-	-	-	-	-
SLC22A18	Protein coding	3	Maternal	Maternal	-	-	-	-	Maternal	-	-	-	-	-	-	-	-	-
TFPI2	Protein coding	3	Maternal	Maternal	Maternal	-	-	-	-	-	-	-	-	-	-	-	-	-
IMPACT	Protein coding	3	-	Paternal	-	-	-	Paternal	-	-	-	-	-	-	Paternal	-	-	-
IGF2AS	Nocoding RNA	3	Paternal	Paternal	Paternal	-	-	-	-	-	-	-	-	-	-	-	-	-
COPG2	Protein coding	3	-	Maternal	Maternal	-	-	-	Maternal	-	-	-	-	-	-	-	-	-
BEGAIN	Protein coding	3	-	Isoform Dependent	-	Paternal	-	-	Paternal	-	-	-	-	-	-	-	-	-
INPP5F	Protein coding	3	-	-	Paternal	Paternal	-	-	Paternal	-	-	-	-	-	-	-	-	-
BLCAP	Protein coding	3	Isoform Dependent	Isoform Dependent	-	-	-	-	Paternal	-	-	-	-	-	-	-	-	-
GTL2	Nocoding RNA	3	-	Maternal	-	-	-	Maternal	Maternal	-	-	-	-	-	-	-	-	-
GRB10	Protein coding	3	Isoform Dependent	Isoform Dependent	-	-	-	-	Maternal	-	-	-	-	-	-	-	-	-
MEG8	Nocoding RNA	3	Maternal	-	-	Maternal	-	-	Maternal	-	-	-	-	-	-	-	-	-
MEG3	Nocoding RNA	3	Maternal	-	Maternal	Maternal	-	-	-	-	-	-	-	-	-	-	-	-
SMOC1	Protein coding	2	Maternal	Paternal	-	-	-	-	-	-	-	-	-	-	-	-	-	-
DDC	Protein coding	2	Isoform Dependent	Paternal	-	-	-	-	-	-	-	-	-	-	-	-	-	-
KCNQ1OT1	Nocoding RNA	2	Paternal	Paternal	-	-	-	-	-	-	-	-	-	-	-	-	-	-
NLRP2	Protein coding	2	Maternal	Maternal	-	-	-	-	-	-	-	-	-	-	-	-	-	-
ASCL2	Protein coding	2	-	Maternal	-	Maternal	-	-	-	-	-	-	-	-	-	-	-	-
XIST	Nocoding RNA	2	-	Paternal	-	Paternal	-	-	-	-	-	-	-	-	-	-	-	-
AMPD3	Protein coding	2	-	Maternal	Maternal	-	-	-	-	-	-	-	-	-	-	-	-	-
MAGI2	Protein coding	2	Maternal	Paternal	-	-	-	-	-	-	-	-	-	-	-	-	-	-
MIR296	Nocoding RNA	2	Paternal	Paternal	-	-	-	-	-	-	-	-	-	-	-	-	-	-
GATM	Protein coding	2	-	Maternal	-	-	-	-	Maternal	-	-	-	-	-	-	-	-	-
PWCR1	Nocoding RNA	2	Paternal	Paternal	-	-	-	-	-	-	-	-	-	-	-	-	-	-
GPR1	Protein coding	2	Paternal	Paternal	-	-	-	-	-	-	-	-	-	-	-	-	-	-
RIAN	Nocoding RNA	2	-	Maternal	-	-	-	Maternal	-	-	-	-	-	-	-	-	-	-
SNURF	Protein coding	2	Paternal	Paternal	-	-	-	-	-	-	-	-	-	-	-	-	-	-
SFMBT2	Protein coding	2	-	Paternal	-	-	-	Maternal	-	-	-	-	-	-	-	-	-	-
HTR2A	Protein coding	2	-	Maternal	-	-	-	-	-	-	Maternal	-	-	-	-	-	-	-
MIRG	Nocoding RNA	2	-	Maternal	-	-	-	-	Maternal	-	-	-	-	-	-	-	-	-
PEG13	Nocoding RNA	2	Paternal	Paternal	-	-	-	-	-	-	-	-	-	-	-	-	-	-
ZNF597	Protein coding	2	Maternal	-	-	Maternal	-	-	-	-	-	-	-	-	-	-	-	-
MCTS2	Protein coding	2	Paternal	Paternal	-	-	-	-	-	-	-	-	-	-	-	-	-	-
UBE3A	Protein coding	2	Maternal	Maternal	-	-	-	-	-	-	-	-	-	-	-	-	-	-
KCNK9	Protein coding	2	Maternal	Maternal	-	-	-	-	-	-	-	-	-	-	-	-	-	-
ZDBF2	Protein coding	2	Paternal	Paternal	-	-	-	-	-	-	-	-	-	-	-	-	-	-
USP29	Protein coding	2	-	Paternal	-	Paternal	-	-	-	-	-	-	-	-	-	-	-	-
APEG3	Nocoding RNA	2	-	-	-	Paternal	-	Paternal	-	-	-	-	-	-	-	-	-	-
TSSC4	Protein coding	2	-	Maternal	-	Maternal	-	-	-	-	-	-	-	-	-	-	-	-
INS	Protein coding	2	Paternal	-	-	-	-	-	-	Paternal	-	-	-	-	-	-	-	-
NTM	Protein coding	2	Maternal	Maternal	-	-	-	-	-	-	-	-	-	-	-	-	-	-
MIR298	Nocoding RNA	2	Paternal	Paternal	-	-	-	-	-	-	-	-	-	-	-	-	-	-
ANO1	Protein coding	2	Maternal	Maternal	-	-	-	-	-	-	-	-	-	-	-	-	-	-
ZIM2	Protein coding	2	Paternal	Maternal	-	-	-	-	-	-	-	-	-	-	-	-	-	-
SLC38A4	Protein coding	2	-	Paternal	Isoform Dependent	-	-	-	-	-	-	-	-	-	-	-	-	-
DLX5	Protein coding	2	Maternal	-	Maternal	-	-	-	-	-	-	-	-	-	-	-	-	-
MIMT1	Nocoding RNA	2	Paternal	-	-	Paternal	-	-	-	-	-	-	-	-	-	-	-	-
KLF14	Protein coding	2	Maternal	Maternal	-	-	-	-	-	-	-	-	-	-	-	-	-	-
HYMAI	Nocoding RNA	2	Paternal	Paternal	-	-	-	-	-	-	-	-	-	-	-	-	-	-
DHCR7	Protein coding	2	-	Maternal	Maternal	-	-	-	-	-	-	-	-	-	-	-	-	-
AK050713	Nocoding RNA	1	-	-	-	-	-	-	Maternal	-	-	-	-	-	-	-	-	-
AF357428	Nocoding RNA	1	-	Maternal	-	-	-	-	-	-	-	-	-	-	-	-	-	-
PRKN	Protein coding	1	-	Maternal	-	-	-	-	-	-	-	-	-	-	-	-	-	-
TH	Protein coding	1	-	Maternal	-	-	-	-	-	-	-	-	-	-	-	-	-	-
OSBPL5	Protein coding	1	Maternal	-	-	-	-	-	-	-	-	-	-	-	-	-	-	-
GDAP1L1	Protein coding	1	Paternal	-	-	-	-	-	-	-	-	-	-	-	-	-	-	-
NPAP1	Protein coding	1	Paternal	-	-	-	-	-	-	-	-	-	-	-	-	-	-	-
ZIM3	Protein coding	1	-	Maternal	-	-	-	-	-	-	-	-	-	-	-	-	-	-
WARS1	Protein coding	1	-	-	-	-	-	-	Paternal	-	-	-	-	-	-	-	-	-
SNORD64	Nocoding RNA	1	Paternal	-	-	-	-	-	-	-	-	-	-	-	-	-	-	-
RHOBTB3	Protein coding	1	Paternal	-	-	-	-	-	-	-	-	-	-	-	-	-	-	-
CPA4	Protein coding	1	Maternal	-	-	-	-	-	-	-	-	-	-	-	-	-	-	-
RNU5D-1	Nocoding RNA	1	Paternal	-	-	-	-	-	-	-	-	-	-	-	-	-	-	-
CD81	Protein coding	1	-	Maternal	-	-	-	-	-	-	-	-	-	-	-	-	-	-
OSBPL1A	Protein coding	1	-	-	Maternal	-	-	-	-	-	-	-	-	-	-	-	-	-
SNORD109B	Nocoding RNA	1	Paternal	-	-	-	-	-	-	-	-	-	-	-	-	-	-	-
SNORD114-1	Nocoding RNA	1	Maternal	-	-	-	-	-	-	-	-	-	-	-	-	-	-	-
FAM50B	Protein coding	1	Paternal	-	-	-	-	-	-	-	-	-	-	-	-	-	-	-
ZFP64	Protein coding	1	-	Paternal	-	-	-	-	-	-	-	-	-	-	-	-	-	-
AF357426	Nocoding RNA	1	-	Maternal	-	-	-	-	-	-	-	-	-	-	-	-	-	-
PON3	Protein coding	1	-	-	-	-	-	-	Paternal	-	-	-	-	-	-	-	-	-
SLC22A2	Protein coding	1	-	Maternal	-	-	-	-	-	-	-	-	-	-	-	-	-	-
FTX	Nocoding RNA	1	-	Paternal	-	-	-	-	-	-	-	-	-	-	-	-	-	-
ZFP127AS	Nocoding RNA	1	-	Maternal	-	-	-	-	-	-	-	-	-	-	-	-	-	-
L3MBTL	Protein coding	1	-	-	-	-	-	-	-	-	Paternal	-	-	-	-	-	-	-
HOXA4	Protein coding	1	Maternal	-	-	-	-	-	-	-	-	-	-	-	-	-	-	-
MIR411	Nocoding RNA	1	-	Maternal	-	-	-	-	-	-	-	-	-	-	-	-	-	-
LOC101907679	Nocoding RNA	1	-	-	-	Paternal	-	-	-	-	-	-	-	-	-	-	-	-
MIR371A	Nocoding RNA	1	Paternal	-	-	-	-	-	-	-	-	-	-	-	-	-	-	-
SNORD116	Nocoding RNA	1	Paternal	-	-	-	-	-	-	-	-	-	-	-	-	-	-	-
ZFAT	Protein coding	1	Paternal	-	-	-	-	-	-	-	-	-	-	-	-	-	-	-
INS2	Protein coding	1	-	Paternal	-	-	-	-	-	-	-	-	-	-	-	-	-	-
DLGAP2	Protein coding	1	Paternal	-	-	-	-	-	-	-	-	-	-	-	-	-	-	-
NOB1	Protein coding	1	-	-	Maternal	-	-	-	-	-	-	-	-	-	-	-	-	-
AIM1	Protein coding	1	Paternal	-	-	-	-	-	-	-	-	-	-	-	-	-	-	-
RHOX5	Protein coding	1	-	Isoform Dependent	-	-	-	-	-	-	-	-	-	-	-	-	-	-
FTHL17E	Protein coding	1	-	Paternal	-	-	-	-	-	-	-	-	-	-	-	-	-	-
ERAP2	Protein coding	1	Paternal	-	-	-	-	-	-	-	-	-	-	-	-	-	-	-
GAB1	Protein coding	1	-	Paternal	-	-	-	-	-	-	-	-	-	-	-	-	-	-
ZNF396	Protein coding	1	Paternal	-	-	-	-	-	-	-	-	-	-	-	-	-	-	-
HECW1	Protein coding	1	Paternal	-	-	-	-	-	-	-	-	-	-	-	-	-	-	-
MIR376B	Nocoding RNA	1	-	Maternal	-	-	-	-	-	-	-	-	-	-	-	-	-	-
AK053394	Nocoding RNA	1	-	-	-	-	-	-	Maternal	-	-	-	-	-	-	-	-	-
H13	Nocoding RNA	1	-	Maternal	-	-	-	-	-	-	-	-	-	-	-	-	-	-
ADTRP	Protein coding	1	Maternal	-	-	-	-	-	-	-	-	-	-	-	-	-	-	-
RBP5	Protein coding	1	Maternal	-	-	-	-	-	-	-	-	-	-	-	-	-	-	-
CCDC71L	Protein coding	1	Paternal	-	-	-	-	-	-	-	-	-	-	-	-	-	-	-
JPH3	Protein coding	1	-	-	Paternal	-	-	-	-	-	-	-	-	-	-	-	-	-
CMTM1	Protein coding	1	Paternal	-	-	-	-	-	-	-	-	-	-	-	-	-	-	-
PEG3-AS1	Nocoding RNA	1	Paternal	-	-	-	-	-	-	-	-	-	-	-	-	-	-	-
SNORD108	Nocoding RNA	1	Paternal	-	-	-	-	-	-	-	-	-	-	-	-	-	-	-
MIR410	Nocoding RNA	1	-	Maternal	-	-	-	-	-	-	-	-	-	-	-	-	-	-
AF357359	Nocoding RNA	1	-	Maternal	-	-	-	-	-	-	-	-	-	-	-	-	-	-
GLI3	Protein coding	1	Paternal	-	-	-	-	-	-	-	-	-	-	-	-	-	-	-
MIR370	Nocoding RNA	1	-	Maternal	-	-	-	-	-	-	-	-	-	-	-	-	-	-
CCDC40	Protein coding	1	-	Imprinted	-	-	-	-	-	-	-	-	-	-	-	-	-	-
TNFRSF23	Protein coding	1	-	Maternal	-	-	-	-	-	-	-	-	-	-	-	-	-	-
AQP1	Protein coding	1	-	Maternal	-	-	-	-	-	-	-	-	-	-	-	-	-	-
LOC104974975	Protein coding	1	-	-	-	Maternal	-	-	-	-	-	-	-	-	-	-	-	-
FTHL17A	Protein coding	1	-	Paternal	-	-	-	-	-	-	-	-	-	-	-	-	-	-
PGM2L1	Protein coding	1	-	-	Maternal	-	-	-	-	-	-	-	-	-	-	-	-	-
AF313042	Protein coding	1	-	Maternal	-	-	-	-	-	-	-	-	-	-	-	-	-	-
DACT2	Protein coding	1	-	Maternal	-	-	-	-	-	-	-	-	-	-	-	-	-	-
MIR431	Nocoding RNA	1	-	Maternal	-	-	-	-	-	-	-	-	-	-	-	-	-	-
CASD1	Protein coding	1	-	-	-	-	-	-	Maternal	-	-	-	-	-	-	-	-	-
PRR25	Protein coding	1	Paternal	-	-	-	-	-	-	-	-	-	-	-	-	-	-	-
MIR127	Nocoding RNA	1	-	Maternal	-	-	-	-	-	-	-	-	-	-	-	-	-	-
ASB4	Protein coding	1	-	Maternal	-	-	-	-	-	-	-	-	-	-	-	-	-	-
ZFAT-AS1	Nocoding RNA	1	Paternal	-	-	-	-	-	-	-	-	-	-	-	-	-	-	-
SGK2	Protein coding	1	Paternal	-	-	-	-	-	-	-	-	-	-	-	-	-	-	-
GALNT6	Protein coding	1	-	Paternal	-	-	-	-	-	-	-	-	-	-	-	-	-	-
NAA60	Protein coding	1	Maternal	-	-	-	-	-	-	-	-	-	-	-	-	-	-	-
GM35612	Nocoding RNA	1	-	Maternal	-	-	-	-	-	-	-	-	-	-	-	-	-	-
RAC1	Protein coding	1	Imprinted	-	-	-	-	-	-	-	-	-	-	-	-	-	-	-
FTHL17D	Protein coding	1	-	Paternal	-	-	-	-	-	-	-	-	-	-	-	-	-	-
NAP1L4	Protein coding	1	-	Maternal	-	-	-	-	-	-	-	-	-	-	-	-	-	-
MIR337	Nocoding RNA	1	-	Maternal	-	-	-	-	-	-	-	-	-	-	-	-	-	-
MIR134	Nocoding RNA	1	-	Maternal	-	-	-	-	-	-	-	-	-	-	-	-	-	-
SNORD113-1	Nocoding RNA	1	Maternal	-	-	-	-	-	-	-	-	-	-	-	-	-	-	-
TP53	Protein coding	1	Imprinted	-	-	-	-	-	-	-	-	-	-	-	-	-	-	-
DCN	Protein coding	1	-	Maternal	-	-	-	-	-	-	-	-	-	-	-	-	-	-
ZC3H12C	Protein coding	1	Paternal	-	-	-	-	-	-	-	-	-	-	-	-	-	-	-
DGCR6L	Protein coding	1	Random	-	-	-	-	-	-	-	-	-	-	-	-	-	-	-
CHRAC1	Protein coding	1	-	Maternal	-	-	-	-	-	-	-	-	-	-	-	-	-	-
ESR2	Protein coding	1	Imprinted	-	-	-	-	-	-	-	-	-	-	-	-	-	-	-
SNORD107	Nocoding RNA	1	Paternal	-	-	-	-	-	-	-	-	-	-	-	-	-	-	-
PWAR6	Nocoding RNA	1	Paternal	-	-	-	-	-	-	-	-	-	-	-	-	-	-	-
WT1-AS	Nocoding RNA	1	Paternal	-	-	-	-	-	-	-	-	-	-	-	-	-	-	-
LOC100849023	Nocoding RNA	1	-	-	-	Paternal	-	-	-	-	-	-	-	-	-	-	-	-
FTHL17F	Protein coding	1	-	Paternal	-	-	-	-	-	-	-	-	-	-	-	-	-	-
FTHL17C	Protein coding	1	-	Paternal	-	-	-	-	-	-	-	-	-	-	-	-	-	-
MIR335	Nocoding RNA	1	-	Imprinted	-	-	-	-	-	-	-	-	-	-	-	-	-	-
MESTIT1	Nocoding RNA	1	Paternal	-	-	-	-	-	-	-	-	-	-	-	-	-	-	-
TNFRSF26	Protein coding	1	-	Maternal	-	-	-	-	-	-	-	-	-	-	-	-	-	-
ATP10A	Protein coding	1	Maternal	-	-	-	-	-	-	-	-	-	-	-	-	-	-	-
PRIM2	Protein coding	1	-	-	Paternal	-	-	-	-	-	-	-	-	-	-	-	-	-
HNF1A	Protein coding	1	Imprinted	-	-	-	-	-	-	-	-	-	-	-	-	-	-	-
KBTBD6	Protein coding	1	-	-	Paternal	-	-	-	-	-	-	-	-	-	-	-	-	-
FKBP6	Protein coding	1	-	Paternal	-	-	-	-	-	-	-	-	-	-	-	-	-	-
ZNF709	Protein coding	1	-	-	Paternal	-	-	-	-	-	-	-	-	-	-	-	-	-
LIN28A	Protein coding	1	-	Others	-	-	-	-	-	-	-	-	-	-	-	-	-	-
SNORD109A	Nocoding RNA	1	Paternal	-	-	-	-	-	-	-	-	-	-	-	-	-	-	-
NFKB1	Protein coding	1	Others	-	-	-	-	-	-	-	-	-	-	-	-	-	-	-
MIR380	Nocoding RNA	1	-	Maternal	-	-	-	-	-	-	-	-	-	-	-	-	-	-
ST8SIA1	Protein coding	1	Paternal	-	-	-	-	-	-	-	-	-	-	-	-	-	-	-
COMMD1	Protein coding	1	-	Maternal	-	-	-	-	-	-	-	-	-	-	-	-	-	-
ZFP90	Protein coding	1	Paternal	-	-	-	-	-	-	-	-	-	-	-	-	-	-	-
DSCAM	Protein coding	1	Paternal	-	-	-	-	-	-	-	-	-	-	-	-	-	-	-
TSIX	Nocoding RNA	1	-	Maternal	-	-	-	-	-	-	-	-	-	-	-	-	-	-
LIN28B	Nocoding RNA	1	Paternal	-	-	-	-	-	-	-	-	-	-	-	-	-	-	-
SVOPL	Protein coding	1	Maternal	-	-	-	-	-	-	-	-	-	-	-	-	-	-	-
MIR154	Nocoding RNA	1	-	Maternal	-	-	-	-	-	-	-	-	-	-	-	-	-	-
CDH15	Protein coding	1	-	Paternal	-	-	-	-	-	-	-	-	-	-	-	-	-	-
TNFRSF22	Protein coding	1	-	Maternal	-	-	-	-	-	-	-	-	-	-	-	-	-	-
COPG2IT1	Nocoding RNA	1	Paternal	-	-	-	-	-	-	-	-	-	-	-	-	-	-	-
GLIS3	Protein coding	1	Paternal	-	-	-	-	-	-	-	-	-	-	-	-	-	-	-
IL6	Protein coding	1	-	Others	-	-	-	-	-	-	-	-	-	-	-	-	-	-
ZIM1	Protein coding	1	-	Maternal	-	-	-	-	-	-	-	-	-	-	-	-	-	-
XLR3B	Protein coding	1	-	Maternal	-	-	-	-	-	-	-	-	-	-	-	-	-	-
SLC22A3	Protein coding	1	-	Maternal	-	-	-	-	-	-	-	-	-	-	-	-	-	-
DNMT1	Protein coding	1	Paternal	-	-	-	-	-	-	-	-	-	-	-	-	-	-	-
FTHL17B	Protein coding	1	-	Paternal	-	-	-	-	-	-	-	-	-	-	-	-	-	-
ZRSR1	Protein coding	1	-	Paternal	-	-	-	-	-	-	-	-	-	-	-	-	-	-
PLATR20	Nocoding RNA	1	-	Paternal	-	-	-	-	-	-	-	-	-	-	-	-	-	-
MIR184	Nocoding RNA	1	-	Paternal	-	-	-	-	-	-	-	-	-	-	-	-	-	-
MEIS1	Protein coding	1	-	-	-	-	-	-	-	-	Maternal	-	-	-	-	-	-	-
PRNP	Protein coding	1	-	-	-	-	-	-	Others	-	-	-	-	-	-	-	-	-
SNORD115-48	Nocoding RNA	1	Paternal	-	-	-	-	-	-	-	-	-	-	-	-	-	-	-
QPCT	Protein coding	1	-	Maternal	-	-	-	-	-	-	-	-	-	-	-	-	-	-
SNX14	Protein coding	1	-	Paternal	-	-	-	-	-	-	-	-	-	-	-	-	-	-
MEG9	Nocoding RNA	1	-	-	-	Maternal	-	-	-	-	-	-	-	-	-	-	-	-
THBS2	Protein coding	1	-	Maternal	-	-	-	-	-	-	-	-	-	-	-	-	-	-
RB1	Protein coding	1	Maternal	-	-	-	-	-	-	-	-	-	-	-	-	-	-	-
DIS3L2	Protein coding	1	-	-	Paternal	-	-	-	-	-	-	-	-	-	-	-	-	-
VTRNA2-1	Nocoding RNA	1	Paternal	-	-	-	-	-	-	-	-	-	-	-	-	-	-	-
SGIP1	Protein coding	1	-	-	Paternal	-	-	-	-	-	-	-	-	-	-	-	-	-
ZCCHC13	Protein coding	1	-	Maternal	-	-	-	-	-	-	-	-	-	-	-	-	-	-
MIR136	Nocoding RNA	1	-	Maternal	-	-	-	-	-	-	-	-	-	-	-	-	-	-
NCTC1	Nocoding RNA	1	-	Paternal	-	-	-	-	-	-	-	-	-	-	-	-	-	-
PDE10A	Protein coding	1	-	Maternal	-	-	-	-	-	-	-	-	-	-	-	-	-	-
DGCR6	Protein coding	1	Random	-	-	-	-	-	-	-	-	-	-	-	-	-	-	-
AF357355	Nocoding RNA	1	-	Maternal	-	-	-	-	-	-	-	-	-	-	-	-	-	-
WT1	Protein coding	1	Paternal	-	-	-	-	-	-	-	-	-	-	-	-	-	-	-
AK155734	Nocoding RNA	1	-	Maternal	-	-	-	-	-	-	-	-	-	-	-	-	-	-
THRB	Protein coding	1	-	-	Paternal	-	-	-	-	-	-	-	-	-	-	-	-	-
PEG12	Protein coding	1	-	Paternal	-	-	-	-	-	-	-	-	-	-	-	-	-	-
PXDC1	Protein coding	1	Paternal	-	-	-	-	-	-	-	-	-	-	-	-	-	-	-
NESPAS	Nocoding RNA	1	-	Paternal	-	-	-	-	-	-	-	-	-	-	-	-	-	-
CALCR	Protein coding	1	-	Maternal	-	-	-	-	-	-	-	-	-	-	-	-	-	-
TP73	Protein coding	1	Maternal	-	-	-	-	-	-	-	-	-	-	-	-	-	-	-
PSIMCT-1	Protein coding	1	Paternal	-	-	-	-	-	-	-	-	-	-	-	-	-	-	-
PEG3OS	Nocoding RNA	1	-	Maternal	-	-	-	-	-	-	-	-	-	-	-	-	-	-
KCNQ1DN	Nocoding RNA	1	Maternal	-	-	-	-	-	-	-	-	-	-	-	-	-	-	-
AF357425	Nocoding RNA	1	-	Maternal	-	-	-	-	-	-	-	-	-	-	-	-	-	-
LRRTM1	Protein coding	1	Paternal	-	-	-	-	-	-	-	-	-	-	-	-	-	-	-
TRAPPC9	Protein coding	1	-	Maternal	-	-	-	-	-	-	-	-	-	-	-	-	-	-
L3MBTL1	Protein coding	1	Paternal	-	-	-	-	-	-	-	-	-	-	-	-	-	-	-
PON2	Protein coding	1	-	-	Maternal	-	-	-	-	-	-	-	-	-	-	-	-	-
IRAIN	Nocoding RNA	1	Paternal	-	-	-	-	-	-	-	-	-	-	-	-	-	-	-
PARD6G	Protein coding	1	Maternal	-	-	-	-	-	-	-	-	-	-	-	-	-	-	-
SMOC2	Protein coding	1	-	Maternal	-	-	-	-	-	-	-	-	-	-	-	-	-	-
JADE1	Protein coding	1	-	Paternal	-	-	-	-	-	-	-	-	-	-	-	-	-	-
MUSD2	Nocoding RNA	1	-	Imprinted	-	-	-	-	-	-	-	-	-	-	-	-	-	-
AF357341	Nocoding RNA	1	-	Maternal	-	-	-	-	-	-	-	-	-	-	-	-	-	-
TACC2	Protein coding	1	-	-	Paternal	-	-	-	-	-	-	-	-	-	-	-	-	-
JPX	Nocoding RNA	1	-	Paternal	-	-	-	-	-	-	-	-	-	-	-	-	-	-

## Sheet: Sheet 2 (liver)
Ensembl ID of known imprinted genes	Gene symbol	Chromosome	TSS	If genes with differential RPS between parent-of-origin	Mean RPS in maternal allele	Mean RPS in paternal allele	P-value of RPS	ΔRPS (maternal – paternal)	Enhancer number				Promoter type	Mean TPM in maternal allele	Mean TPM in paternal allele	Allelic expression ratio of maternal allele
									All	High activity	Moderate activity	Low activity
ENSSSCG00000004012	THBS2	1	855030	No	3.13058	1.91854	0.132772	1.21203	3	0	0	3	Active	7.35804	6.92841	0.515036
ENSSSCG00000004013	SMOC2	1	1333092	No	0.83504	1.20294	0.584484	-0.3679	1	0	0	1	Active	2.32235	2.41046	0.490691
ENSSSCG00000031703	DACT2	1	1413856	N.A. (No enhancers)	-	-	-	-	-	-	-	-	Active	0.00409297	0.00409297	-
ENSSSCG00000004027	PDE10A	1	3120223	No	10.0572	9.86691	0.825288	0.190254	8	3	4	1	Active	5.27455	5.06173	0.510295
ENSSSCG00000004032	PRKN	1	5465511	N.A. (No enhancers)	-	-	-	-	-	-	-	-	Active	1.71248	1.79663	0.488011
ENSSSCG00000004039	SLC22A3	1	7207402	N.A. (No enhancers)	-	-	-	-	-	-	-	-	Active	0.576966	0.704237	0.450331
ENSSSCG00000004040	SLC22A2	1	7289831	N.A. (No enhancers)	-	-	-	-	-	-	-	-	Inactive	0.372812	0.175737	-
ENSSSCG00000004044	IGF2R	1	7472548	Higher RPS in maternal allele	12.6143	8.15832	0.0189169	4.45599	7	0	5	2	Active	16.5893	9.14379	0.644668
ENSSSCG00000004127	PLAGL1	1	21304042	No	1.02485	1.44943	0.309233	-0.42458	1	0	0	1	Active	0.0344141	1.72009	0.0196147
ENSSSCG00000004293	SNX14	1	54547216	No	1.23873	0.986844	0.262214	0.251891	1	0	0	1	Active	74.452	72.0485	0.508203
ENSSSCG00000004672	GATM	1	126361945	N.A. (No enhancers)	-	-	-	-	-	-	-	-	Active	59.1833	77.1104	0.434233
ENSSSCG00000004830	ATP10A	1	141494883	N.A. (No enhancers)	-	-	-	-	-	-	-	-	Active	0.374573	0.496081	-
ENSSSCG00000004832	UBE3A	1	141887168	No	2.42347	2.43698	0.972296	-0.0135118	2	0	0	2	Active	75.3415	75.4194	0.499741
ENSSSCG00000004834	NDN	1	142412565	Higher RPS in paternal allele	2.14797	4.66804	0.0249376	-2.52007	4	0	0	4	Active	0.198955	47.0095	0.00421439
ENSSSCG00000004835	MAGEL2	1	142448689	Higher RPS in paternal allele	7.27096	18.2882	0.000222193	-11.0173	13	2	0	11	Inactive	0.032571	1.92212	0.016663
ENSSSCG00000004836	MKRN3	1	142500982	N.A. (No enhancers)	-	-	-	-	-	-	-	-	Active	0.425668	1.47705	0.223715
ENSSSCG00000005109	ESR2	1	193722164	N.A. (No enhancers)	-	-	-	-	-	-	-	-	Inactive	0.0177091	0.0177091	-
ENSSSCG00000005224	GLIS3	1	217629331	N.A. (No enhancers)	-	-	-	-	-	-	-	-	Active	2.42788	3.03654	0.444307
ENSSSCG00000050649	H19	2	1384446	Higher RPS in maternal allele	29.8243	11.378	4.975e-05	18.4463	20	0	1	19	Active	3138.33	32.32	0.989807
ENSSSCG00000035293	IGF2	2	1496442	Higher RPS in paternal allele	39.5861	53.495	0.00491765	-13.9089	38	0	1	37	Active	21.5926	627.543	0.0332636
ENSSSCG00000033740	INS	2	1497841	Higher RPS in paternal allele	39.5861	53.495	0.00491765	-13.9089	38	0	1	37	Inactive	0	0	-
ENSSSCG00000039767	TH	2	1506615	No	7.28882	10.0865	0.0587912	-2.7977	7	0	0	7	Inactive	0.0334738	0.0334738	-
ENSSSCG00000039243	CD81	2	1506652	No	7.28882	10.0865	0.0587912	-2.7977	7	0	0	7	Inactive	190.454	205.737	0.480713
ENSSSCG00000033507	ASCL2	2	1560112	No	3.88159	3.74936	0.86814	0.132234	3	0	0	3	Active	0.0949037	0.0949037	-
ENSSSCG00000036015	TSSC4	2	1643013	No	11.0352	11.1277	0.803755	-0.0925055	8	0	1	7	Active	19.3016	18.1389	0.515527
ENSSSCG00000039556	KCNQ1	2	1675360	No	12.0943	12.219	0.818415	-0.124717	8	0	1	7	Active	9.77463	2.01079	0.829383
ENSSSCG00000040461	CDKN1C	2	2021853	No	62.3077	62.7145	0.58842	-0.406829	42	4	5	33	Active	5.63204	1.80706	0.757086
ENSSSCG00000012855	SLC22A18	2	2028396	No	46.4251	48.2337	0.205001	-1.80859	30	0	5	25	Active	13.1307	5.16341	0.717756
ENSSSCG00000021597	PHLDA2	2	2058694	No	10.1953	9.88104	0.643393	0.314259	7	0	0	7	Active	33.4473	24.3188	0.579013
ENSSSCG00000012856	NAP1L4	2	2117487	N.A. (No enhancers)	-	-	-	-	-	-	-	-	Active	44.1425	43.8137	0.501869
ENSSSCG00000012862	OSBPL5	2	2285854	No	20.0835	21.9105	0.357396	-1.82699	16	0	0	16	Inactive	1.92661	1.95063	0.496902
ENSSSCG00000021181	DHCR7	2	2377416	N.A. (No enhancers)	-	-	-	-	-	-	-	-	Active	50.1168	48.949	0.505894
ENSSSCG00000024158	ANO1	2	3373411	No	7.30437	6.75286	0.293809	0.551508	5	0	1	4	Active	7.13948	7.40669	0.490815
ENSSSCG00000013316	WT1	2	28411794	N.A. (No enhancers)	-	-	-	-	-	-	-	-	Active	0.433957	0.650936	0.4
ENSSSCG00000022492	AMPD3	2	49083590	N.A. (No enhancers)	-	-	-	-	-	-	-	-	Active	3.24842	3.22451	0.501846
ENSSSCG00000013659	DNMT1	2	69029919	N.A. (No enhancers)	-	-	-	-	-	-	-	-	Active	25.4972	25.0021	0.504903
ENSSSCG00000029805	RHOBTB3	2	102334741	No	1.50733	1.43758	0.493914	0.069746	1	0	1	0	Active	23.6974	23.0215	0.507234
ENSSSCG00000027860	ERAP2	2	103510440	N.A. (No enhancers)	-	-	-	-	-	-	-	-	Active	34.0798	31.6032	0.518853
ENSSSCG00000035090	RAC1	3	4803687	N.A. (No enhancers)	-	-	-	-	-	-	-	-	Active	59.2105	66.0328	0.472764
ENSSSCG00000007702	FKBP6	3	10669828	N.A. (No enhancers)	-	-	-	-	-	-	-	-	Inactive	0.0124681	0.0124681	-
ENSSSCG00000021065	NAA60	3	38782056	N.A. (No enhancers)	-	-	-	-	-	-	-	-	Active	17.9208	16.0471	0.527581
ENSSSCG00000023859	LRRTM1	3	63587499	N.A. (No enhancers)	-	-	-	-	-	-	-	-	Inactive	0.0230298	0.0230298	-
ENSSSCG00000039161	MEIS1	3	75625040	No	25.7062	25.933	0.356678	-0.22679	17	0	4	13	Active	29.9513	29.1198	0.507038
ENSSSCG00000008376	COMMD1	3	79913975	No	5.60955	5.37219	0.211563	0.237361	4	0	4	0	Active	-	-	-
ENSSSCG00000008491	QPCT	3	102823026	N.A. (No enhancers)	-	-	-	-	-	-	-	-	Active	3.69283	4.96214	0.426671
ENSSSCG00000005933	CHRAC1	4	3028725	No	7.11603	7.65413	0.436435	-0.538098	5	0	0	5	Active	31.7391	33.4041	0.487221
ENSSSCG00000005934	TRAPPC9	4	3065236	No	7.17084	7.76544	0.220229	-0.5946	5	0	0	5	Active	12.726	13.7798	0.480121
ENSSSCG00000033397	KCNK9	4	3561851	No	4.75644	4.67653	0.937903	0.0799107	4	0	0	4	Active	0.0650551	0.0650551	-
ENSSSCG00000030947	ZFAT	4	7016753	No	17.0298	16.9133	0.576664	0.116531	12	0	3	9	Active	2.37127	2.50837	0.485952
ENSSSCG00000031329	ST8SIA1	5	51211302	Higher RPS in maternal allele	25.6126	24.1598	0.0289294	1.45274	18	0	2	16	Active	13.2621	10.5558	0.556812
ENSSSCG00000026597	SLC38A4	5	77489326	N.A. (No enhancers)	-	-	-	-	-	-	-	-	Active	339.599	341.159	0.498854
ENSSSCG00000000915	DCN	5	91678608	No	1.32462	1.40919	0.483994	-0.0845696	1	0	0	1	Inactive	60.2962	62.0499	0.492833
ENSSSCG00000002642	CDH15	6	652165	No	8.02846	7.81383	0.657061	0.214634	7	0	0	7	Active	0.0126274	0.0126274	-
ENSSSCG00000002753	NOB1	6	17233858	No	4.11488	5.42371	0.10825	-1.30883	4	0	2	2	Active	15.3305	15.1713	0.50261
ENSSSCG00000032372	ZFP90	6	18335458	N.A. (No enhancers)	-	-	-	-	-	-	-	-	Active	5.72088	6.55617	0.465982
ENSSSCG00000003277	NLRP2	6	59203788	N.A. (No enhancers)	-	-	-	-	-	-	-	-	Inactive	0	0	-
ENSSSCG00000003326	PEG3	6	61292885	No	1.04416	0.237617	0.0847506	0.806544	1	0	0	1	Inactive	0.0566762	16.124	0.0035027
ENSSSCG00000033319	USP29	6	61517226	No	1.63914	1.39602	0.801225	0.243119	2	0	0	2	Inactive	0.0247544	0.0247544	-
ENSSSCG00000025685	TP73	6	65177682	N.A. (No enhancers)	-	-	-	-	-	-	-	-	Inactive	0.0411523	0.0411523	-
ENSSSCG00000003557	LIN28A	6	83806122	N.A. (No enhancers)	-	-	-	-	-	-	-	-	Inactive	0.167573	0.167573	-
ENSSSCG00000003712	OSBPL1A	6	109221010	No	3.29274	3.29356	0.99796	-0.000819108	2	0	1	1	Inactive	119.993	115.345	0.509876
ENSSSCG00000030018	ZNF396	6	119193296	No	1.2273	1.27473	0.788011	-0.0474271	1	0	0	1	Active	0.603164	0.694283	0.464885
ENSSSCG00000023376	PARD6G	6	128250663	N.A. (No enhancers)	-	-	-	-	-	-	-	-	Active	0.915231	1.24539	0.423596
ENSSSCG00000003797	DIRAS3	6	144558104	No	2.39081	2.23755	0.509221	0.153255	2	0	0	2	Inactive	4.3783	2.18915	0.666667
ENSSSCG00000025243	SGIP1	6	146051955	N.A. (No enhancers)	-	-	-	-	-	-	-	-	Active	0.707621	0.480565	0.595548
ENSSSCG00000025582	PXDC1	7	2250028	No	7.88762	8.3428	0.527194	-0.455178	5	0	0	5	Active	25.0797	21.4208	0.539342
ENSSSCG00000026323	FAM50B	7	2309088	No	4.78084	4.20474	0.169615	0.576096	3	0	0	3	Active	0.0533305	0.0533305	-
ENSSSCG00000001048	ADTRP	7	8314339	No	3.80777	4.03507	0.423695	-0.227294	3	1	0	2	Active	83.1209	86.3703	0.490414
ENSSSCG00000001493	PRIM2	7	28631514	No	1.15865	1.22729	0.757807	-0.0686424	1	0	0	1	Active	18.5555	19.5326	0.487173
ENSSSCG00000001771	RASGRF1	7	48246749	N.A. (No enhancers)	-	-	-	-	-	-	-	-	Active	0.040969	0.040969	-
ENSSSCG00000002314	SMOC1	7	93475973	No	15.2197	16.355	0.0954815	-1.13531	11	0	0	11	Inactive	17.8172	18.2669	0.493769
ENSSSCG00000002516	WARS1	7	121238113	No	1.26574	1.32194	0.634821	-0.0561994	1	0	0	1	Active	20.5101	19.2065	0.516411
ENSSSCG00000036589	BEGAIN	7	121434427	No	0.865076	1.3888	0.164964	-0.523725	1	0	1	0	Active	1.28174	1.72413	0.426414
ENSSSCG00000035805	DLK1	7	121565854	No	1.87845	3.03867	0.242438	-1.16022	3	0	0	3	Inactive	0.146643	0.146643	-
ENSSSCG00000002573	RTL1	7	121711414	N.A. (No enhancers)	-	-	-	-	-	-	-	-	Inactive	0.0106668	0.00243801	-
ENSSSCG00000009048	GAB1	8	84391621	N.A. (No enhancers)	-	-	-	-	-	-	-	-	Active	3.7597	3.36486	0.52771
ENSSSCG00000009071	JADE1	8	96692407	N.A. (No enhancers)	-	-	-	-	-	-	-	-	Active	14.9777	18.4187	0.448482
ENSSSCG00000030957	NFKB1	8	118506691	No	3.31594	3.30979	0.989174	0.00614343	3	0	2	1	Active	20.7439	21.7645	0.487996
ENSSSCG00000014838	PGM2L1	9	8761709	N.A. (No enhancers)	-	-	-	-	-	-	-	-	Active	3.74878	3.37853	0.525974
ENSSSCG00000015014	ZC3H12C	9	38137966	N.A. (No enhancers)	-	-	-	-	-	-	-	-	Active	3.7283	3.69229	0.502426
ENSSSCG00000015253	NTM	9	57966239	Higher RPS in paternal allele	1.03416	1.61066	0.0194076	-0.576501	1	0	1	0	Inactive	0.0837616	0.0837616	-
ENSSSCG00000015320	CALCR	9	73403434	N.A. (No enhancers)	-	-	-	-	-	-	-	-	Inactive	0.754411	0.35292	0.681288
ENSSSCG00000015322	TFPI2	9	73689095	Higher RPS in maternal allele	4.06706	3.29097	0.0355749	0.776086	3	0	0	3	Active	75.875	77.419	0.494964
ENSSSCG00000015327	CASD1	9	74276610	Higher RPS in paternal allele	1.28385	2.49761	0.0372413	-1.21376	2	0	0	2	Active	31.4802	26.8913	0.539308
ENSSSCG00000015328	SGCE	9	74473898	Higher RPS in paternal allele	6.02884	12.7299	0.00522069	-6.70107	9	0	6	3	Active	-	-	-
ENSSSCG00000036049	PEG10	9	74474058	Higher RPS in paternal allele	6.02884	12.7299	0.00522069	-6.70107	9	0	6	3	Active	0.850834	336.565	0.00252162
ENSSSCG00000015329	PPP1R9A	9	74635280	N.A. (No enhancers)	-	-	-	-	-	-	-	-	Active	12.7354	9.71772	0.5672
ENSSSCG00000029515	PON3	9	75017942	Higher RPS in paternal allele	2.57399	2.9134	0.0189041	-0.339416	2	0	0	2	Active	148.875	149.588	0.498805
ENSSSCG00000015333	ASB4	9	75018067	Higher RPS in paternal allele	2.57399	2.9134	0.0189041	-0.339416	2	0	0	2	Active	39.5639	37.0878	0.516152
ENSSSCG00000015331	PON2	9	75051422	No	2.48688	1.90358	0.264176	0.583301	2	0	0	2	Active	253.778	222.996	0.532281
ENSSSCG00000038838	DLX5	9	76643884	No	4.2356	4.41343	0.789968	-0.17783	4	0	1	3	Active	0.034538	0.034538	-
ENSSSCG00000020970	IL6	9	91506340	No	12.0837	12.3269	0.81858	-0.243267	9	0	6	3	Active	0.0882771	0.0882771	-
ENSSSCG00000031780	MAGI2	9	100847212	N.A. (No enhancers)	-	-	-	-	-	-	-	-	Active	0.510304	1.09351	0.318182
ENSSSCG00000050093	CCDC71L	9	106545053	No	1.27418	1.18339	0.641875	0.0907868	1	0	0	1	Active	22.0625	21.0046	0.512283
ENSSSCG00000022009	DDC	9	136571197	No	1.16985	1.08234	0.719304	0.0875114	1	0	1	0	Active	42.6399	49.399	0.463281
ENSSSCG00000015631	GRB10	9	136742532	No	1.06347	1.12095	0.875733	-0.0574776	1	0	0	1	Active	8.3546	7.88196	0.514555
ENSSSCG00000024480	SFMBT2	10	63877025	No	25.9369	25.8117	0.856768	0.125201	19	0	12	7	Active	21.2138	19.188	0.525071
ENSSSCG00000009401	RB1	11	19317690	No	12.1269	11.2759	0.290386	0.850981	9	0	2	7	Active	10.4296	12.6193	0.452499
ENSSSCG00000037452	HTR2A	11	20555961	No	2.64715	3.43857	0.242532	-0.791416	3	0	0	3	Inactive	0.22342	0.291676	-
ENSSSCG00000031378	KBTBD6	11	25643709	N.A. (No enhancers)	-	-	-	-	-	-	-	-	Active	2.69544	38.9577	0.0647116
ENSSSCG00000017158	CCDC40	12	2384025	N.A. (No enhancers)	-	-	-	-	-	-	-	-	Active	0.219669	0.110886	-
ENSSSCG00000017950	TP53	12	52953819	No	1.91859	2.13476	0.753589	-0.216169	2	0	0	2	Active	15.7566	14.4558	0.521528
ENSSSCG00000036033	THRB	13	11359544	No	10.5491	15.5575	0.177991	-5.0084	12	0	6	6	Active	9.13185	7.90183	0.536105
ENSSSCG00000012072	DSCAM	13	204313713	N.A. (No enhancers)	-	-	-	-	-	-	-	-	Inactive	0.020119	0.020119	-
ENSSSCG00000009919	HNF1A	14	40868676	No	15.1669	15.1194	0.727848	0.0474859	10	0	1	9	Active	12.3346	11.3436	0.520927
ENSSSCG00000032073	DGCR6L	14	51657535	N.A. (No enhancers)	-	-	-	-	-	-	-	-	Active	18.5102	13.3974	0.580119
ENSSSCG00000010687	INPP5F	14	129561034	N.A. (No enhancers)	-	-	-	-	-	-	-	-	Inactive	6.87607	6.51484	0.513488
ENSSSCG00000037530	TACC2	14	131621940	No	1.52167	1.39758	0.406248	0.124087	1	0	0	1	Inactive	1.4293	0.56514	0.716642
ENSSSCG00000015746	DLGAP2	15	32600234	N.A. (No enhancers)	-	-	-	-	-	-	-	-	Active	0.245376	0.353529	-
ENSSSCG00000016129	GPR1	15	109521194	N.A. (No enhancers)	-	-	-	-	-	-	-	-	Inactive	0.817644	0.818473	0.499747
ENSSSCG00000016130	ZDBF2	15	109563440	N.A. (No enhancers)	-	-	-	-	-	-	-	-	Active	0.377916	1.95994	0.161651
ENSSSCG00000022177	DIS3L2	15	132540558	N.A. (No enhancers)	-	-	-	-	-	-	-	-	Active	9.42962	8.95393	0.512938
ENSSSCG00000007039	PRNP	17	13693628	No	2.65337	2.3838	0.445071	0.269571	2	0	0	2	Inactive	33.3275	29.9521	0.526671
ENSSSCG00000007336	NNAT	17	40627101	No	21.8316	21.247	0.480961	0.584614	16	0	5	11	Active	1.2206	3.63109	0.251583
ENSSSCG00000024325	SGK2	17	46188256	No	2.59379	2.21127	0.323325	0.382524	2	0	0	2	Active	14.8033	31.002	0.323179
ENSSSCG00000007373	GDAP1L1	17	46709391	N.A. (No enhancers)	-	-	-	-	-	-	-	-	Active	0.133424	0.315643	-
ENSSSCG00000007481	ZFP64	17	53459599	N.A. (No enhancers)	-	-	-	-	-	-	-	-	Active	3.41757	3.72635	0.478389
ENSSSCG00000007520	GNAS	17	58998981	No	2.67047	2.27727	0.242995	0.393201	2	0	1	1	Active	275.191	254.431	0.519599
ENSSSCG00000016517	SVOPL	18	10977656	N.A. (No enhancers)	-	-	-	-	-	-	-	-	Inactive	0.910527	0.565293	0.616963
ENSSSCG00000016550	KLF14	18	18147124	N.A. (No enhancers)	-	-	-	-	-	-	-	-	Active	0.0181787	0.0181787	-
ENSSSCG00000016553	COPG2	18	18209263	No	1.0783	0.897524	0.58473	0.180771	1	0	0	1	Active	24.5553	24.9422	0.496092
ENSSSCG00000016554	MEST	18	18345843	N.A. (No enhancers)	-	-	-	-	-	-	-	-	Active	9.18597	10.8964	0.457414
ENSSSCG00000016555	CPA4	18	18581003	N.A. (No enhancers)	-	-	-	-	-	-	-	-	Inactive	0.144859	0.281358	-
ENSSSCG00000033190	AQP1	18	42076746	N.A. (No enhancers)	-	-	-	-	-	-	-	-	Active	11.3991	9.92526	0.534558
ENSSSCG00000036443	HECW1	18	51802945	N.A. (No enhancers)	-	-	-	-	-	-	-	-	Inactive	0.0294008	0.0294008	-
ENSSSCG00000016763	GLI3	18	52404071	N.A. (No enhancers)	-	-	-	-	-	-	-	-	Active	0.734076	1.03006	0.416111

## Sheet: Sheet 3 (muscle)
Ensembl ID of known imprinted genes	Gene symbol	Chromosome	TSS	If genes with differential RPS between parent-of-origin	Mean RPS of maternal	Mean RPS of paternal	P-value of RPS	ΔRPS (maternal – paternal)	Enhancer number				Promoter class	Mean TPM in maternal allele	Mean TPM in paternal allele	Allelic expression ratio of maternal
									All	High activity	Moderate activity	Low activity
ENSSSCG00000004012	THBS2	1	855030	No	10.1033	10.6946	0.530346	-0.591253	9	0	4	5	Active	30.2851	29.5949	0.505763
ENSSSCG00000004013	SMOC2	1	1333092	No	14.6047	15.4706	0.717502	-0.865937	13	0	5	8	Active	5.82799	7.15837	0.448778
ENSSSCG00000031703	DACT2	1	1413856	N.A. (No enhancers)	-	-	-	-	-	-	-	-	Active	0.747136	0.252626	0.747314
ENSSSCG00000004027	PDE10A	1	3120223	No	1.12385	1.18203	0.817161	-0.0581794	1	0	1	0	Active	3.13311	3.35855	0.482636
ENSSSCG00000004032	PRKN	1	5465511	N.A. (No enhancers)	-	-	-	-	-	-	-	-	Active	3.92728	4.53409	0.464142
ENSSSCG00000004039	SLC22A3	1	7207402	N.A. (No enhancers)	-	-	-	-	-	-	-	-	Active	2.62042	1.74974	0.599617
ENSSSCG00000004040	SLC22A2	1	7289831	No	8.23686	8.18897	0.951942	0.0478909	7	0	5	2	Inactive	0.0051933	0.0051933	-
ENSSSCG00000004044	IGF2R	1	7472548	Higher RPS in maternal allele	10.7148	6.60619	0.0208011	4.1086	6	0	0	6	Active	40.1151	5.65088	0.876527
ENSSSCG00000004127	PLAGL1	1	21304042	Higher RPS in paternal allele	5.3526	8.38811	0.001087	-3.03551	5	0	3	2	Active	0.134107	15.2759	0.00870256
ENSSSCG00000004293	SNX14	1	54547216	No	1.41561	1.42506	0.929358	-0.00945009	1	0	0	1	Active	33.8868	37.269	0.476234
ENSSSCG00000004672	GATM	1	126361945	N.A. (No enhancers)	-	-	-	-	-	-	-	-	Active	1.41902	2.83803	0.333333
ENSSSCG00000004830	ATP10A	1	141494883	No	1.28709	1.21876	0.512814	0.0683287	1	0	1	0	Active	6.24253	5.23532	0.543876
ENSSSCG00000004832	UBE3A	1	141887168	Higher RPS in maternal allele	7.03388	6.0094	0.00723031	1.02448	5	0	1	4	Active	133.065	110.856	0.545525
ENSSSCG00000004834	NDN	1	142412565	Higher RPS in paternal allele	0.222527	1.28424	0.0143502	-1.06172	1	0	0	1	Active	0.177091	78.0897	0.00226265
ENSSSCG00000004835	MAGEL2	1	142448689	Higher RPS in paternal allele	3.9798	16.6671	0.000467065	-12.6873	11	0	0	11	Inactive	0	4.73093	0
ENSSSCG00000004836	MKRN3	1	142500982	Higher RPS in paternal allele	0.336746	1.33407	0.0264061	-0.997321	1	0	0	1	Active	0.103468	2.41621	0.0410641
ENSSSCG00000005109	ESR2	1	193722164	N.A. (No enhancers)	-	-	-	-	-	-	-	-	Inactive	0.0112026	0.0124658	-
ENSSSCG00000005224	GLIS3	1	217629331	N.A. (No enhancers)	-	-	-	-	-	-	-	-	Active	2.24205	2.26776	0.497149
ENSSSCG00000050649	H19	2	1384446	Higher RPS in maternal allele	38.9057	14.742	0.003351	24.1637	24	0	0	24	Active	3917.41	3.01	0.999232
ENSSSCG00000035293	IGF2	2	1496442	Higher RPS in paternal allele	34.4789	52.6901	0.000464825	-18.2112	35	0	1	34	Active	34.5818	410.966	0.0776164
ENSSSCG00000033740	INS	2	1497841	Higher RPS in paternal allele	34.4789	52.6901	0.000464825	-18.2112	35	0	1	34	Active	0	0	-
ENSSSCG00000039767	TH	2	1506615	No	10.9633	12.718	0.0989896	-1.7547	9	0	0	9	Active	0	0	-
ENSSSCG00000039243	CD81	2	1506652	No	10.9633	12.718	0.0989896	-1.7547	9	0	0	9	Active	169.369	155.987	0.520565
ENSSSCG00000033507	ASCL2	2	1560112	No	3.16239	3.40662	0.447203	-0.244233	2	0	0	2	Active	0.0687446	0.0687446	-
ENSSSCG00000036015	TSSC4	2	1643013	No	10.3719	10.275	0.938374	0.096918	8	0	0	8	Active	35.6425	31.132	0.533774
ENSSSCG00000039556	KCNQ1	2	1675360	No	13.9213	14.1238	0.881196	-0.202506	11	0	0	11	Active	2.26076	0.604947	0.788902
ENSSSCG00000040461	CDKN1C	2	2021853	No	64.6413	62.2464	0.0767099	2.39493	42	0	2	40	Active	37.3008	4.38202	0.894872
ENSSSCG00000012855	SLC22A18	2	2028396	Higher RPS in maternal allele	63.0703	59.1051	0.00453669	3.96524	39	0	3	36	Active	1.03129	0.64683	0.61455
ENSSSCG00000021597	PHLDA2	2	2058694	No	9.2446	9.12083	0.919168	0.123771	7	0	0	7	Active	3.68837	2.68967	0.578292
ENSSSCG00000012856	NAP1L4	2	2117487	N.A. (No enhancers)	-	-	-	-	-	-	-	-	Active	120.465	116.985	0.507328
ENSSSCG00000012862	OSBPL5	2	2285854	No	19.3945	20.6099	0.445053	-1.21538	14	0	1	13	Active	6.37687	5.90158	0.519354
ENSSSCG00000021181	DHCR7	2	2377416	N.A. (No enhancers)	-	-	-	-	-	-	-	-	Active	4.41249	3.34673	0.568677
ENSSSCG00000024158	ANO1	2	3373411	N.A. (No enhancers)	-	-	-	-	-	-	-	-	Inactive	6.2038	6.16804	0.501445
ENSSSCG00000013316	WT1	2	28411794	N.A. (No enhancers)	-	-	-	-	-	-	-	-	Active	0.093384	0.093384	-
ENSSSCG00000022492	AMPD3	2	49083590	No	0	0.795046	0.18169	-0.795046	1	0	0	1	Active	2.82504	3.34755	0.457675
ENSSSCG00000013659	DNMT1	2	69029919	N.A. (No enhancers)	-	-	-	-	-	-	-	-	Active	19.6784	20.7251	0.487047
ENSSSCG00000029805	RHOBTB3	2	102334741	Higher RPS in paternal allele	5.65945	6.13755	0.0180998	-0.478105	4	0	0	4	Active	58.2323	61.7575	0.48531
ENSSSCG00000027860	ERAP2	2	103510440	N.A. (No enhancers)	-	-	-	-	-	-	-	-	Active	10.9154	12.1418	0.473405
ENSSSCG00000035090	RAC1	3	4803687	N.A. (No enhancers)	-	-	-	-	-	-	-	-	Active	111.787	120.835	0.480553
ENSSSCG00000007702	FKBP6	3	10669828	N.A. (No enhancers)	-	-	-	-	-	-	-	-	Inactive	0	0	-
ENSSSCG00000021065	NAA60	3	38782056	N.A. (No enhancers)	-	-	-	-	-	-	-	-	Active	17.7443	17.5513	0.502734
ENSSSCG00000023859	LRRTM1	3	63587499	N.A. (No enhancers)	-	-	-	-	-	-	-	-	Active	-	-	-
ENSSSCG00000039161	MEIS1	3	75625040	No	7.92676	8.0965	0.446608	-0.169734	6	0	1	5	Active	11.3212	12.9567	0.466317
ENSSSCG00000008376	COMMD1	3	79913975	No	1.2681	1.36883	0.314435	-0.100725	1	0	0	1	Active	-	-	-
ENSSSCG00000008491	QPCT	3	102823026	N.A. (No enhancers)	-	-	-	-	-	-	-	-	Active	5.26849	4.73423	0.526706
ENSSSCG00000005933	CHRAC1	4	3028725	No	11.3017	11.5435	0.444576	-0.241849	7	0	0	7	Active	23.7042	22.5958	0.511969
ENSSSCG00000005934	TRAPPC9	4	3065236	No	10.9247	11.2001	0.301689	-0.275361	7	0	0	7	Active	20.8762	20.8664	0.500118
ENSSSCG00000033397	KCNK9	4	3561851	No	8.15951	9.41705	0.282555	-1.25753	7	0	4	3	Active	0.0318871	0.0318871	-
ENSSSCG00000030947	ZFAT	4	7016753	No	23.3435	22.9602	0.600343	0.383271	15	0	4	11	Active	6.15277	5.95447	0.508189
ENSSSCG00000031329	ST8SIA1	5	51211302	No	23.0963	22.9548	0.87604	0.141453	17	0	3	14	Active	2.24275	2.71457	0.452412
ENSSSCG00000026597	SLC38A4	5	77489326	No	6.59228	6.51928	0.707496	0.0730005	4	0	0	4	Active	53.2031	47.336	0.529178
ENSSSCG00000000915	DCN	5	91678608	No	4.2893	4.22721	0.779218	0.0620962	3	0	3	0	Active	1066.59	1056.74	0.502319
ENSSSCG00000002642	CDH15	6	652165	No	8.52256	8.93681	0.666574	-0.414245	6	0	0	6	Active	18.9344	18.059	0.511832
ENSSSCG00000002753	NOB1	6	17233858	No	4.38113	4.45223	0.795297	-0.0711075	3	0	3	0	Active	16.4593	17.6785	0.482143
ENSSSCG00000032372	ZFP90	6	18335458	No	2.55572	2.62236	0.918745	-0.0666346	2	0	0	2	Active	9.52754	8.80189	0.519795
ENSSSCG00000003277	NLRP2	6	59203788	N.A. (No enhancers)	-	-	-	-	-	-	-	-	Inactive	0	0	-
ENSSSCG00000003326	PEG3	6	61292885	N.A. (No enhancers)	-	-	-	-	-	-	-	-	Active	0	14.8125	0
ENSSSCG00000033319	USP29	6	61517226	N.A. (No enhancers)	-	-	-	-	-	-	-	-	Inactive	0	0	-
ENSSSCG00000025685	TP73	6	65177682	N.A. (No enhancers)	-	-	-	-	-	-	-	-	Inactive	7.36575	5.89452	0.555475
ENSSSCG00000003557	LIN28A	6	83806122	N.A. (No enhancers)	-	-	-	-	-	-	-	-	Active	-	-	-
ENSSSCG00000003712	OSBPL1A	6	109221010	No	3.48101	3.57295	0.392836	-0.0919363	2	0	0	2	Inactive	30.0575	26.7881	0.528756
ENSSSCG00000030018	ZNF396	6	119193296	No	1.4661	1.34798	0.271848	0.118121	1	0	0	1	Active	0.595874	0.500752	0.54337
ENSSSCG00000023376	PARD6G	6	128250663	No	0.245765	0.851051	0.431044	-0.605285	1	0	0	1	Active	2.21646	3.14316	0.413548
ENSSSCG00000003797	DIRAS3	6	144558104	N.A. (No enhancers)	-	-	-	-	-	-	-	-	Inactive	-	-	-
ENSSSCG00000025243	SGIP1	6	146051955	N.A. (No enhancers)	-	-	-	-	-	-	-	-	Active	0.886844	0.862272	0.507024
ENSSSCG00000025582	PXDC1	7	2250028	No	18.2694	18.868	0.448245	-0.598621	12	0	0	12	Active	23.3055	22.9188	0.504182
ENSSSCG00000026323	FAM50B	7	2309088	No	1.4568	1.56642	0.735468	-0.109616	1	0	0	1	Active	0.0417996	0.0417996	-
ENSSSCG00000001048	ADTRP	7	8314339	N.A. (No enhancers)	-	-	-	-	-	-	-	-	Inactive	0.136995	0.136995	-
ENSSSCG00000001493	PRIM2	7	28631514	No	0.567978	0.975866	0.381426	-0.407888	1	0	0	1	Active	7.57419	6.12691	0.552816
ENSSSCG00000001771	RASGRF1	7	48246749	N.A. (No enhancers)	-	-	-	-	-	-	-	-	Active	0.0319359	0.0319359	-
ENSSSCG00000002314	SMOC1	7	93475973	No	4.87604	5.2504	0.127515	-0.374362	4	0	2	2	Inactive	2.03023	2.22394	0.477233
ENSSSCG00000002516	WARS1	7	121238113	No	1.35519	1.34599	0.890568	0.00919596	1	0	0	1	Active	36.2512	36.6627	0.497178
ENSSSCG00000036589	BEGAIN	7	121434427	No	2.08564	2.33566	0.584652	-0.25002	3	0	0	3	Active	0.0484376	2.03148	0.0232882
ENSSSCG00000035805	DLK1	7	121565854	No	4.49526	5.8062	0.270683	-1.31094	5	0	1	4	Active	0.378435	22.7757	0.0163442
ENSSSCG00000002573	RTL1	7	121711414	N.A. (No enhancers)	-	-	-	-	-	-	-	-	Active	0.104664	0.00724893	-
ENSSSCG00000009048	GAB1	8	84391621	No	4.008	4.07131	0.689011	-0.0633093	3	0	1	2	Active	7.61407	7.23145	0.512887
ENSSSCG00000009071	JADE1	8	96692407	No	1.35546	1.29991	0.590888	0.0555537	1	0	0	1	Active	18.5926	17.6227	0.51339
ENSSSCG00000030957	NFKB1	8	118506691	No	4.94412	4.86421	0.894624	0.0799091	4	0	4	0	Active	17.5368	17.4494	0.50125
ENSSSCG00000014838	PGM2L1	9	8761709	No	3.53117	3.62835	0.568387	-0.0971849	2	0	0	2	Active	8.1599	8.11822	0.50128
ENSSSCG00000015014	ZC3H12C	9	38137966	No	0.990368	1.13628	0.659751	-0.14591	1	0	1	0	Active	12.0419	10.7926	0.527356
ENSSSCG00000015253	NTM	9	57966239	N.A. (No enhancers)	-	-	-	-	-	-	-	-	Active	0.185001	0.185001	-
ENSSSCG00000015320	CALCR	9	73403434	N.A. (No enhancers)	-	-	-	-	-	-	-	-	Active	13.0688	8.81002	0.597326
ENSSSCG00000015322	TFPI2	9	73689095	No	1.33823	1.14016	0.0263897	0.198076	1	0	1	0	Active	61.0272	52.4429	0.537826
ENSSSCG00000015327	CASD1	9	74276610	No	1.90865	2.67918	0.136941	-0.770534	2	0	1	1	Active	14.7982	14.9156	0.498025
ENSSSCG00000015328	SGCE	9	74473898	Higher RPS in paternal allele	1.95457	4.29661	0.00400436	-2.34204	3	0	2	1	Active	-	-	-
ENSSSCG00000036049	PEG10	9	74474058	Higher RPS in paternal allele	1.95457	4.29661	0.00400436	-2.34204	3	0	2	1	Active	0.386731	48.8324	0.00785734
ENSSSCG00000015329	PPP1R9A	9	74635280	N.A. (No enhancers)	-	-	-	-	-	-	-	-	Active	15.2065	14.7501	0.507618
ENSSSCG00000029515	PON3	9	75017942	N.A. (No enhancers)	-	-	-	-	-	-	-	-	Active	1.10909	2.88006	0.278028
ENSSSCG00000015333	ASB4	9	75018067	N.A. (No enhancers)	-	-	-	-	-	-	-	-	Active	35.6025	40.1147	0.470203
ENSSSCG00000015331	PON2	9	75051422	N.A. (No enhancers)	-	-	-	-	-	-	-	-	Active	34.2316	32.4695	0.513209
ENSSSCG00000038838	DLX5	9	76643884	No	2.72939	2.46569	0.262794	0.263702	2	0	0	2	Active	0	0	-
ENSSSCG00000020970	IL6	9	91506340	No	1.26819	1.32889	0.543001	-0.0607001	1	0	0	1	Active	0	0	-
ENSSSCG00000031780	MAGI2	9	100847212	No	0	0.873254	0.181852	-0.873254	1	0	0	1	Active	0.437117	2.05307	0.175536
ENSSSCG00000050093	CCDC71L	9	106545053	No	1.14986	1.23677	0.44904	-0.0869092	1	1	0	0	Active	7.31781	7.17623	0.504884
ENSSSCG00000022009	DDC	9	136571197	N.A. (No enhancers)	-	-	-	-	-	-	-	-	Inactive	1.33486	3.00753	0.307402
ENSSSCG00000015631	GRB10	9	136742532	No	11.6871	12.3615	0.18607	-0.674487	9	0	0	9	Active	43.0416	39.8628	0.519171
ENSSSCG00000024480	SFMBT2	10	63877025	No	8.15025	8.39397	0.491737	-0.243711	6	0	1	5	Active	3.75162	3.85214	0.49339
ENSSSCG00000009401	RB1	11	19317690	No	13.4425	14.331	0.130352	-0.888476	10	0	8	2	Active	19.223	17.9478	0.517154
ENSSSCG00000037452	HTR2A	11	20555961	No	1.32615	1.76901	0.674781	-0.442857	3	0	0	3	Active	0.203994	0.10623	-
ENSSSCG00000031378	KBTBD6	11	25643709	N.A. (No enhancers)	-	-	-	-	-	-	-	-	Active	0.116863	5.88051	0.0194858
ENSSSCG00000017158	CCDC40	12	2384025	N.A. (No enhancers)	-	-	-	-	-	-	-	-	Active	0.0561879	0.0561879	-
ENSSSCG00000017950	TP53	12	52953819	No	1.66437	1.78996	0.103229	-0.125588	1	0	0	1	Active	26.7206	28.6826	0.482293
ENSSSCG00000036033	THRB	13	11359544	No	2.80497	2.62112	0.153917	0.183844	2	0	1	1	Active	9.04286	7.43526	0.54878
ENSSSCG00000012072	DSCAM	13	204313713	N.A. (No enhancers)	-	-	-	-	-	-	-	-	Active	0.0296645	0.0296645	-
ENSSSCG00000009919	HNF1A	14	40868676	No	24.1977	24.164	0.763631	0.0336124	16	0	3	13	Active	0.0108372	0.00842894	-
ENSSSCG00000032073	DGCR6L	14	51657535	No	7.12143	6.8472	0.955163	0.274229	9	0	0	9	Active	19.3077	17.7628	0.520837
ENSSSCG00000010687	INPP5F	14	129561034	N.A. (No enhancers)	-	-	-	-	-	-	-	-	Inactive	19.9832	15.7098	0.559864
ENSSSCG00000037530	TACC2	14	131621940	No	3.54931	3.58658	0.760978	-0.0372661	2	0	0	2	Active	42.5277	44.4021	0.489219
ENSSSCG00000015746	DLGAP2	15	32600234	N.A. (No enhancers)	-	-	-	-	-	-	-	-	Active	0.0839026	0.114046	-
ENSSSCG00000016129	GPR1	15	109521194	N.A. (No enhancers)	-	-	-	-	-	-	-	-	Active	1.81536	3.06834	0.371718
ENSSSCG00000016130	ZDBF2	15	109563440	No	1.351	1.29949	0.275416	0.0515102	1	0	0	1	Active	1.09919	2.3174	0.32172
ENSSSCG00000022177	DIS3L2	15	132540558	N.A. (No enhancers)	-	-	-	-	-	-	-	-	Active	20.1968	19.3479	0.510733
ENSSSCG00000007039	PRNP	17	13693628	No	1.2981	1.01694	0.0875569	0.281158	1	0	0	1	Inactive	51.4217	47.6373	0.519102
ENSSSCG00000007336	NNAT	17	40627101	Higher RPS in paternal allele	8.22266	8.68474	0.0241715	-0.462077	6	0	0	6	Active	2.23644	6.27138	0.262869
ENSSSCG00000024325	SGK2	17	46188256	N.A. (No enhancers)	-	-	-	-	-	-	-	-	Inactive	0.760148	0.734459	0.508594
ENSSSCG00000007373	GDAP1L1	17	46709391	N.A. (No enhancers)	-	-	-	-	-	-	-	-	Active	0.208322	0.336519	-
ENSSSCG00000007481	ZFP64	17	53459599	N.A. (No enhancers)	-	-	-	-	-	-	-	-	Active	6.60643	6.81139	0.492362
ENSSSCG00000007520	GNAS	17	58998981	Higher RPS in maternal allele	5.7204	4.86738	0.0347384	0.853022	4	0	3	1	Active	589.511	603.121	0.494294
ENSSSCG00000016517	SVOPL	18	10977656	N.A. (No enhancers)	-	-	-	-	-	-	-	-	Inactive	0	0	-
ENSSSCG00000016550	KLF14	18	18147124	N.A. (No enhancers)	-	-	-	-	-	-	-	-	Active	0.104823	0.104823	-
ENSSSCG00000016553	COPG2	18	18209263	No	2.25956	1.75722	0.273122	0.502347	2	0	1	1	Active	23.6047	21.1677	0.527216
ENSSSCG00000016554	MEST	18	18345843	Higher RPS in paternal allele	6.17293	10.2942	0.00367358	-4.12129	7	0	1	6	Active	5.53351	52.1903	0.0958619
ENSSSCG00000016555	CPA4	18	18581003	Higher RPS in paternal allele	0.316995	1.3548	0.012456	-1.03781	1	0	1	0	Inactive	0.595693	0.372308	0.615385
ENSSSCG00000033190	AQP1	18	42076746	No	0.81761	1.31401	0.252279	-0.496398	1	0	0	1	Active	126.708	137.176	0.480165
ENSSSCG00000036443	HECW1	18	51802945	N.A. (No enhancers)	-	-	-	-	-	-	-	-	Active	0.045976	0.045976	-
ENSSSCG00000016763	GLI3	18	52404071	N.A. (No enhancers)	-	-	-	-	-	-	-	-	Active	3.08144	2.81797	0.52233

## Sheet: Sheet 4 (brain)
Ensembl ID of known imprinted genes	Gene symbol	Chromosome	TSS	If genes with differential RPS between parent-of-origin	Mean RPS in maternal allele	Mean RPS in paternal allele	P-value of RPS	ΔRPS (maternal – paternal)	Enhancer number				Promoter type	Mean TPM in maternal allele	Mean TPM of paternal allele	Allelic expression ratio of maternal
									All	High activity	Moderate activity	Low activity
ENSSSCG00000004012	THBS2	1	855030	N.A. (No enhancers)	-	-	-	-	-	-	-	-	Active	3.09704	3.7633	0.451441
ENSSSCG00000004013	SMOC2	1	1333092	No	11.0085	11.1	0.923018	-0.0914447	8	0	7	1	Active	0.417588	0.464771	-
ENSSSCG00000031703	DACT2	1	1413856	No	1.55675	1.47393	0.386233	0.0828201	1	0	1	0	Active	3.60419	3.80391	0.48652
ENSSSCG00000004027	PDE10A	1	3120223	No	8.51703	8.52735	0.975772	-0.0103182	6	0	3	3	Active	34.9549	36.0065	0.492591
ENSSSCG00000004032	PRKN	1	5465511	No	1.16079	1.29159	0.182064	-0.130797	1	0	0	1	Active	3.86007	3.50643	0.524003
ENSSSCG00000004039	SLC22A3	1	7207402	No	0	0.76849	0.18169	-0.76849	1	0	0	1	Active	1.94964	1.45942	0.571899
ENSSSCG00000004040	SLC22A2	1	7289831	No	1.27871	1.37571	0.399969	-0.0970031	1	0	0	1	Inactive	0.626029	0.609256	0.506789
ENSSSCG00000004044	IGF2R	1	7472548	Higher RPS in maternal allele	4.92518	4.14399	0.0107898	0.781189	3	3	0	0	Active	5.97522	6.30395	0.486614
ENSSSCG00000004127	PLAGL1	1	21304042	Higher RPS in paternal allele	3.84042	5.46089	0.0293466	-1.62047	3	0	2	1	Active	0.0693538	7.25381	0.00947047
ENSSSCG00000004293	SNX14	1	54547216	No	4.41307	4.51468	0.147568	-0.101608	3	0	0	3	Active	67.9903	65.6743	0.508663
ENSSSCG00000004672	GATM	1	126361945	N.A. (No enhancers)	-	-	-	-	-	-	-	-	Active	11.2151	16.8219	0.400011
ENSSSCG00000004830	ATP10A	1	141494883	N.A. (No enhancers)	-	-	-	-	-	-	-	-	Active	4.72294	3.46605	0.576743
ENSSSCG00000004832	UBE3A	1	141887168	No	1.20155	1.51078	0.0951648	-0.30923	1	0	1	0	Active	44.3008	44.4951	0.498906
ENSSSCG00000004834	NDN	1	142412565	Higher RPS in paternal allele	0.162647	1.51721	0.00457389	-1.35457	1	0	0	1	Active	0.442499	91.6946	0.00480261
ENSSSCG00000004835	MAGEL2	1	142448689	Higher RPS in paternal allele	9.85191	22.2966	0.00364431	-12.4446	14	0	0	14	Inactive	0.0829101	16.2567	0.00507419
ENSSSCG00000004836	MKRN3	1	142500982	Higher RPS in paternal allele	2.12068	4.85919	0.00202368	-2.73852	3	0	0	3	Active	0.213646	7.46502	0.0278234
ENSSSCG00000005109	ESR2	1	193722164	N.A. (No enhancers)	-	-	-	-	-	-	-	-	Inactive	0.367391	0.53647	0.406468
ENSSSCG00000005224	GLIS3	1	217629331	N.A. (No enhancers)	-	-	-	-	-	-	-	-	Active	7.81731	7.69268	0.504018
ENSSSCG00000050649	H19	2	1384446	Higher RPS in maternal allele	30.01	14.88	0.0005992	15.13	19	0	0	19	Inactive	0	0	-
ENSSSCG00000035293	IGF2	2	1496442	Higher RPS in paternal allele	21.3426	26.5196	0.014396	-5.177	18	0	16	2	Inactive	0	0	-
ENSSSCG00000033740	INS	2	1497841	Higher RPS in paternal allele	21.3426	26.5196	0.014396	-5.177	18	0	16	2	Inactive	0	0	-
ENSSSCG00000039767	TH	2	1506615	No	6.83074	7.13678	0.140963	-0.306035	5	0	2	3	Inactive	0.967781	0.673239	0.589744
ENSSSCG00000039243	CD81	2	1506652	No	6.83074	7.13678	0.140963	-0.306035	5	0	2	3	Inactive	174.884	171.525	0.504849
ENSSSCG00000033507	ASCL2	2	1560112	No	3.22425	3.2449	0.959279	-0.0206494	2	0	1	1	Active	0.163811	0.163811	-
ENSSSCG00000036015	TSSC4	2	1643013	No	8.07815	8.56389	0.0710542	-0.485737	5	0	3	2	Active	9.58352	11.3219	0.458423
ENSSSCG00000039556	KCNQ1	2	1675360	No	9.90558	10.1952	0.415613	-0.289657	6	0	4	2	Active	0.0641741	0.0994565	-
ENSSSCG00000040461	CDKN1C	2	2021853	No	50.0106	51.2983	0.0760493	-1.28774	32	1	18	13	Active	-	-	-
ENSSSCG00000012855	SLC22A18	2	2028396	No	47.2983	47.9386	0.339499	-0.64033	29	0	17	12	Inactive	0.022897	0.022897	-
ENSSSCG00000021597	PHLDA2	2	2058694	No	2.95662	3.0367	0.731548	-0.0800818	2	0	1	1	Active	1.33083	0.665413	0.666667
ENSSSCG00000012856	NAP1L4	2	2117487	N.A. (No enhancers)	-	-	-	-	-	-	-	-	Active	39.2491	37.8279	0.50922
ENSSSCG00000012862	OSBPL5	2	2285854	No	21.9702	20.4242	0.174957	1.54603	14	0	5	9	Active	6.82083	6.88648	0.497605
ENSSSCG00000021181	DHCR7	2	2377416	N.A. (No enhancers)	-	-	-	-	-	-	-	-	Active	9.4472	9.81521	0.490448
ENSSSCG00000024158	ANO1	2	3373411	N.A. (No enhancers)	-	-	-	-	-	-	-	-	Inactive	0.602627	0.532853	0.530724
ENSSSCG00000013316	WT1	2	28411794	N.A. (No enhancers)	-	-	-	-	-	-	-	-	Active	0.0276846	0.0276846	-
ENSSSCG00000022492	AMPD3	2	49083590	N.A. (No enhancers)	-	-	-	-	-	-	-	-	Active	4.09735	4.3519	0.484936
ENSSSCG00000013659	DNMT1	2	69029919	N.A. (No enhancers)	-	-	-	-	-	-	-	-	Active	22.2409	23.2556	0.488849
ENSSSCG00000029805	RHOBTB3	2	102334741	No	4.14303	4.16717	0.931441	-0.0241445	3	0	2	1	Active	20.1449	17.5035	0.53508
ENSSSCG00000027860	ERAP2	2	103510440	N.A. (No enhancers)	-	-	-	-	-	-	-	-	Active	3.7305	3.65523	0.505095
ENSSSCG00000035090	RAC1	3	4803687	N.A. (No enhancers)	-	-	-	-	-	-	-	-	Active	126.274	120.105	0.512519
ENSSSCG00000007702	FKBP6	3	10669828	N.A. (No enhancers)	-	-	-	-	-	-	-	-	Inactive	0.00995458	0.00995458	-
ENSSSCG00000021065	NAA60	3	38782056	No	2.49855	2.71592	0.0651575	-0.217375	2	0	0	2	Active	21.7764	21.0092	0.508966
ENSSSCG00000023859	LRRTM1	3	63587499	No	2.92447	2.92458	0.999608	-0.000111053	2	0	2	0	Active	18.6434	18.2315	0.505585
ENSSSCG00000039161	MEIS1	3	75625040	No	10.7075	10.5077	0.419753	0.19975	7	0	2	5	Active	6.72718	7.47505	0.473671
ENSSSCG00000008376	COMMD1	3	79913975	No	4.49994	4.59973	0.384788	-0.0997903	3	0	1	2	Active	-	-	-
ENSSSCG00000008491	QPCT	3	102823026	N.A. (No enhancers)	-	-	-	-	-	-	-	-	Active	3.08568	2.58608	0.544043
ENSSSCG00000005933	CHRAC1	4	3028725	No	11.0224	10.7933	0.464881	0.229047	7	0	2	5	Active	7.93128	7.44484	0.515818
ENSSSCG00000005934	TRAPPC9	4	3065236	No	4.56441	4.58995	0.904777	-0.0255493	3	0	1	2	Active	32.7878	34.8047	0.48508
ENSSSCG00000033397	KCNK9	4	3561851	No	12.1594	12.0178	0.755571	0.141595	8	0	5	3	Active	3.91597	3.37353	0.537207
ENSSSCG00000030947	ZFAT	4	7016753	Higher RPS in maternal allele	22.0961	21.4887	0.0091096	0.607384	14	0	5	9	Active	5.31376	5.82478	0.477061
ENSSSCG00000031329	ST8SIA1	5	51211302	No	36.8461	36.9778	0.617079	-0.131718	24	0	3	21	Active	16.1673	16.9139	0.488715
ENSSSCG00000026597	SLC38A4	5	77489326	N.A. (No enhancers)	-	-	-	-	-	-	-	-	Active	0.777294	0.951604	0.449589
ENSSSCG00000000915	DCN	5	91678608	N.A. (No enhancers)	-	-	-	-	-	-	-	-	Inactive	13.034	12.8156	0.504225
ENSSSCG00000002642	CDH15	6	652165	No	14.4013	13.8452	0.399117	0.556103	10	0	0	10	Active	0.0275986	0.0275986	-
ENSSSCG00000002753	NOB1	6	17233858	No	2.94127	3.13266	0.296304	-0.191393	2	0	2	0	Active	10.5107	10.1121	0.509662
ENSSSCG00000032372	ZFP90	6	18335458	No	1.52609	1.52328	0.976761	0.0028048	1	0	0	1	Active	16.1591	16.6537	0.492463
ENSSSCG00000003277	NLRP2	6	59203788	N.A. (No enhancers)	-	-	-	-	-	-	-	-	Inactive	0	0	-
ENSSSCG00000003326	PEG3	6	61292885	N.A. (No enhancers)	-	-	-	-	-	-	-	-	Inactive	0.0353939	35.8025	0.000987611
ENSSSCG00000033319	USP29	6	61517226	N.A. (No enhancers)	-	-	-	-	-	-	-	-	Inactive	0.00954708	0.00954708	-
ENSSSCG00000025685	TP73	6	65177682	N.A. (No enhancers)	-	-	-	-	-	-	-	-	Inactive	0.0915799	0.0915799	-
ENSSSCG00000003557	LIN28A	6	83806122	No	1.17959	1.36047	0.134126	-0.180878	1	0	0	1	Inactive	-	-	-
ENSSSCG00000003712	OSBPL1A	6	109221010	No	3.45114	3.40439	0.825651	0.0467475	2	0	0	2	Inactive	76.4415	78.7308	0.492623
ENSSSCG00000030018	ZNF396	6	119193296	No	1.46486	1.46111	0.745336	0.00375397	1	0	1	0	Active	6.01623	7.06858	0.459788
ENSSSCG00000023376	PARD6G	6	128250663	No	1.41786	1.37402	0.381525	0.0438383	1	0	1	0	Active	1.66211	1.50948	0.524062
ENSSSCG00000003797	DIRAS3	6	144558104	No	6.98987	7.12619	0.634232	-0.136316	5	0	1	4	Inactive	135.189	102.711	0.56826
ENSSSCG00000025243	SGIP1	6	146051955	No	13.865	13.9607	0.876832	-0.0956546	10	0	8	2	Active	34.3178	34.2536	0.500468
ENSSSCG00000025582	PXDC1	7	2250028	No	13.4034	13.4047	0.995883	-0.00132257	9	0	1	8	Active	5.74531	5.14872	0.527382
ENSSSCG00000026323	FAM50B	7	2309088	N.A. (No enhancers)	-	-	-	-	-	-	-	-	Inactive	0.155634	0.260253	-
ENSSSCG00000001048	ADTRP	7	8314339	N.A. (No enhancers)	-	-	-	-	-	-	-	-	Inactive	-	-	-
ENSSSCG00000001493	PRIM2	7	28631514	N.A. (No enhancers)	-	-	-	-	-	-	-	-	Active	7.81274	8.62494	0.475294
ENSSSCG00000001771	RASGRF1	7	48246749	No	2.35446	1.44657	0.203862	0.907888	2	0	1	1	Active	26.0707	24.661	0.513893
ENSSSCG00000002314	SMOC1	7	93475973	No	21.893	21.7798	0.604687	0.113272	15	3	8	4	Inactive	11.6251	12.1792	0.488362
ENSSSCG00000002516	WARS1	7	121238113	Higher RPS in paternal allele	6.08325	11.7698	0.0409592	-5.68655	8	0	1	7	Active	31.655	39.7552	0.443283
ENSSSCG00000036589	BEGAIN	7	121434427	No	1.97854	1.34078	0.418257	0.637763	2	0	0	2	Active	9.83658	21.3385	0.315527
ENSSSCG00000035805	DLK1	7	121565854	No	3.72355	2.13212	0.223884	1.59143	4	0	2	2	Active	0.0819215	0.0819215	-
ENSSSCG00000002573	RTL1	7	121711414	N.A. (No enhancers)	-	-	-	-	-	-	-	-	Inactive	0.0125579	0.000125386	-
ENSSSCG00000009048	GAB1	8	84391621	No	14.2967	14.5701	0.573783	-0.273417	10	0	2	8	Active	12.9164	12.7553	0.503138
ENSSSCG00000009071	JADE1	8	96692407	N.A. (No enhancers)	-	-	-	-	-	-	-	-	Active	8.50499	8.28895	0.506432
ENSSSCG00000030957	NFKB1	8	118506691	No	6.67055	6.66821	0.996736	0.00233185	5	0	3	2	Active	5.23466	5.34832	0.49463
ENSSSCG00000014838	PGM2L1	9	8761709	N.A. (No enhancers)	-	-	-	-	-	-	-	-	Active	61.0813	68.1206	0.472759
ENSSSCG00000015014	ZC3H12C	9	38137966	Higher RPS in maternal allele	5.99229	5.64409	0.0302122	0.348199	4	0	3	1	Active	8.67487	8.4785	0.505724
ENSSSCG00000015253	NTM	9	57966239	No	34.1175	34.3377	0.777077	-0.220177	23	13	1	9	Active	43.6783	45.8242	0.488012
ENSSSCG00000015320	CALCR	9	73403434	N.A. (No enhancers)	-	-	-	-	-	-	-	-	Active	95.215	99.5312	0.488918
ENSSSCG00000015322	TFPI2	9	73689095	N.A. (No enhancers)	-	-	-	-	-	-	-	-	Active	1.43357	2.38929	0.375
ENSSSCG00000015327	CASD1	9	74276610	Higher RPS in paternal allele	2.36381	4.3365	0.01494	-1.97269	3	0	2	1	Active	33.6058	30.5152	0.5241
ENSSSCG00000015328	SGCE	9	74473898	Higher RPS in paternal allele	3.34256	7.59372	0.00167876	-4.25116	5	0	3	2	Active	-	-	-
ENSSSCG00000036049	PEG10	9	74474058	Higher RPS in paternal allele	3.34256	7.59372	0.00167876	-4.25116	5	0	3	2	Active	0.102799	180.187	0.000570186
ENSSSCG00000015329	PPP1R9A	9	74635280	No	11.1713	11.1174	0.813164	0.0538539	8	0	6	2	Active	55.2052	51.1898	0.51887
ENSSSCG00000029515	PON3	9	75017942	No	2.98115	2.89298	0.719696	0.08817	2	0	2	0	Active	0.243133	0.243133	-
ENSSSCG00000015333	ASB4	9	75018067	No	2.98115	2.89298	0.719696	0.08817	2	0	2	0	Active	0.326219	0.289972	-
ENSSSCG00000015331	PON2	9	75051422	No	1.48499	1.53749	0.545232	-0.052497	1	0	1	0	Active	71.1735	63.247	0.529484
ENSSSCG00000038838	DLX5	9	76643884	No	15.5777	15.9416	0.134586	-0.363843	10	0	1	9	Active	1.65434	0.82717	0.666667
ENSSSCG00000020970	IL6	9	91506340	No	2.86898	2.91493	0.821855	-0.0459501	2	0	2	0	Active	0.170829	0.170829	-
ENSSSCG00000031780	MAGI2	9	100847212	N.A. (No enhancers)	-	-	-	-	-	-	-	-	Active	35.6452	36.6742	0.492885
ENSSSCG00000050093	CCDC71L	9	106545053	N.A. (No enhancers)	-	-	-	-	-	-	-	-	Active	7.46423	7.26633	0.506718
ENSSSCG00000022009	DDC	9	136571197	N.A. (No enhancers)	-	-	-	-	-	-	-	-	Inactive	1.88526	2.19208	0.462376
ENSSSCG00000015631	GRB10	9	136742532	No	0.957902	1.31075	0.439273	-0.35285	1	1	0	0	Active	2.22315	2.08111	0.5165
ENSSSCG00000024480	SFMBT2	10	63877025	No	7.58225	7.54779	0.765711	0.0344587	5	0	4	1	Active	5.1285	4.38891	0.538855
ENSSSCG00000009401	RB1	11	19317690	No	8.89903	8.64657	0.152966	0.25246	6	2	4	0	Active	16.5023	17.2502	0.48892
ENSSSCG00000037452	HTR2A	11	20555961	No	2.28667	2.6803	0.443632	-0.39363	2	0	0	2	Active	7.40464	6.81635	0.520684
ENSSSCG00000031378	KBTBD6	11	25643709	No	2.78435	2.71811	0.298406	0.0662374	2	0	0	2	Active	0.359399	25.7115	0.0137855
ENSSSCG00000017158	CCDC40	12	2384025	N.A. (No enhancers)	-	-	-	-	-	-	-	-	Active	2.30205	2.00001	0.535104
ENSSSCG00000017950	TP53	12	52953819	No	3.59535	3.65279	0.403227	-0.0574388	2	0	0	2	Active	4.43337	5.30779	0.455117
ENSSSCG00000036033	THRB	13	11359544	No	5.41975	5.52466	0.403893	-0.104908	4	4	0	0	Active	29.4641	28.7778	0.505892
ENSSSCG00000012072	DSCAM	13	204313713	No	5.91113	5.73288	0.362297	0.178248	4	0	3	1	Active	11.6395	11.5362	0.50223
ENSSSCG00000009919	HNF1A	14	40868676	No	19.5027	19.0801	0.104235	0.422619	12	0	2	10	Inactive	0.00132326	0.000793954	-
ENSSSCG00000032073	DGCR6L	14	51657535	No	2.86723	2.78213	0.487109	0.085101	2	0	0	2	Active	5.32395	5.45406	0.493964
ENSSSCG00000010687	INPP5F	14	129561034	N.A. (No enhancers)	-	-	-	-	-	-	-	-	Inactive	17.444	337.479	0.0491488
ENSSSCG00000037530	TACC2	14	131621940	No	1.58193	1.62703	0.47014	-0.0451015	1	0	1	0	Inactive	5.24492	5.40706	0.492389
ENSSSCG00000015746	DLGAP2	15	32600234	N.A. (No enhancers)	-	-	-	-	-	-	-	-	Active	12.5579	12.2669	0.505861
ENSSSCG00000016129	GPR1	15	109521194	N.A. (No enhancers)	-	-	-	-	-	-	-	-	Active	0.965069	1.8957	0.337346
ENSSSCG00000016130	ZDBF2	15	109563440	N.A. (No enhancers)	-	-	-	-	-	-	-	-	Active	0.976413	1.37231	0.41572
ENSSSCG00000022177	DIS3L2	15	132540558	N.A. (No enhancers)	-	-	-	-	-	-	-	-	Active	13.6315	12.5031	0.52159
ENSSSCG00000007039	PRNP	17	13693628	No	1.52128	1.16057	0.0888342	0.360715	1	0	0	1	Active	207.603	196.458	0.513792
ENSSSCG00000007336	NNAT	17	40627101	No	24.1005	25.771	0.102204	-1.67055	16	0	3	13	Active	15.0981	216.606	0.0651612
ENSSSCG00000024325	SGK2	17	46188256	N.A. (No enhancers)	-	-	-	-	-	-	-	-	Inactive	8.90428	7.22297	0.552126
ENSSSCG00000007373	GDAP1L1	17	46709391	N.A. (No enhancers)	-	-	-	-	-	-	-	-	Active	14.9337	17.2415	0.464137
ENSSSCG00000007481	ZFP64	17	53459599	N.A. (No enhancers)	-	-	-	-	-	-	-	-	Active	5.16114	5.68123	0.476016
ENSSSCG00000007520	GNAS	17	58998981	No	5.10672	6.33559	0.127968	-1.22887	4	0	0	4	Active	743.001	773.099	0.490074
ENSSSCG00000016517	SVOPL	18	10977656	N.A. (No enhancers)	-	-	-	-	-	-	-	-	Inactive	0.118804	0.0823841	-
ENSSSCG00000016550	KLF14	18	18147124	N.A. (No enhancers)	-	-	-	-	-	-	-	-	Active	0.16695	0.16695	-
ENSSSCG00000016553	COPG2	18	18209263	N.A. (No enhancers)	-	-	-	-	-	-	-	-	Active	37.5265	37.9032	0.497503
ENSSSCG00000016554	MEST	18	18345843	Higher RPS in paternal allele	11.8472	13.8598	0.00149182	-2.01261	9	0	0	9	Active	5.71236	56.8093	0.0913661
ENSSSCG00000016555	CPA4	18	18581003	N.A. (No enhancers)	-	-	-	-	-	-	-	-	Inactive	0.192153	0.192153	-
ENSSSCG00000033190	AQP1	18	42076746	N.A. (No enhancers)	-	-	-	-	-	-	-	-	Inactive	0.420392	0.349719	-
ENSSSCG00000036443	HECW1	18	51802945	N.A. (No enhancers)	-	-	-	-	-	-	-	-	Active	17.1453	17.3361	0.497233
ENSSSCG00000016763	GLI3	18	52404071	No	9.27107	9.31431	0.831766	-0.0432368	6	0	4	2	Active	2.77707	2.74083	0.503284

## Sheet: ReadMe
Supplementary Table 8. Allelic PEIs and expression levels of the 126 known imprinted genes in the three tissues.
Sheet 1: List of 126 known imprinted genes retrieved from the genomic imprinting website (https://geneimprint.com/site/home, last access in Dec 2021) with homologs on the autosomes of the pig reference genome.
Sheet 2: Allelic PEIs and expression levels of the 126 imprinted genes in the liver tissue.
Sheet 3: Allelic PEIs and expression levels of the 126 imprinted genes in the skeletal muscle tissue.
Sheet 4: Allelic PEIs and expression levels of the 126 imprinted genes between parents-of-origin in the brain tissue.
