# Supplementary material for: Haplotype-resolved 3D chromatin architecture of the hybrid pig
Source: HighWire-hosted journal article supplement (doi:10.1101/gr.278101.123), 2024-02-01
Supplement: Supplemental_Table_S9.xlsx [file Supplemental_Table_S9.xlsx]

## Sheet: Sheet 1 (summary)
Tissue	Genes with differential RPS between parental breeds	Gene number	% of the genome (autosomes only)	Mean RPS in Berkshire	Mean RPS in Tibetan	ΔRPS (Berkshire – Tibetan)
Liver	Higher RPS in Berkshire haplotypes	254	1.31	9.48	8.04	1.44
	Higher RPS in Tibetan haplotypes	278	1.44	7.52	9.29	-1.77
Muscle	Higher RPS in Berkshire haplotypes	265	1.37	9.65	8.14	0.51
	Higher RPS in Tibetan haplotypes	273	1.41	8.49	10.25	-1.76
Brain	Higher RPS in Berkshire haplotypes	253	1.31	10.74	9.62	1.12
	Higher RPS in Tibetan haplotypes	236	1.22	7.88	9.57	-1.69

## Sheet: Sheet 2 (liver)
Genes with differential RPS between parental breeds	Chromosome	TSS position	Gene Ensembl ID	Gene symbol	RPS		P-value of RPS	ΔRPS (Berkshire – Tibetan)	Promoter type	TPM		Allelic expression ratio of Berkshire	Enhancer location		Enhancer type	PEI intensity		P-value of PEI intensity	ΔPEI intensity (Berkshire – Tibetan)	PEI probability		IDS of promoter region			IDS of enhancer region			PEI interval change ratio (Berkshire / Tibetan)	H3K4me3 signal of promoter region		P-value of H3K4me3 signal	log2FC of H3K4me3 (Berkshire / Tibetan)	H3K27ac signal of enhancer region		P-value of H3K27ac signal	log2FC of H3K27ac (Berkshire / Tibetan)
					Berkshire	Tibetan				Berkshire	Tibetan		Start	End		Berkshire	Tibetan			Berkshire	Tibetan	T vs. B	T vs. T	B vs. B	T vs. B	T vs. T	B vs. B		Berkshire	Tibetan			Berkshire	Tibetan
Higher RPS in Berkshire	1	578431	ENSSSCG00000038931	C6ORF120	6.56827	5.62773	0.0155333	0.940539	Active	43.1686	40.6455	0.515052	25000	30000	Less activity	21.2262	19.9389	0.841819	1.28731	0.555982	0.186482	0.99935	0.9997	1	0.996101	0.9976	0.999533	-0.0123018	42.6852	45.1925	0.278552	-0.0821612	15.6753	17.498	0.64045	-0.157747
Higher RPS in Berkshire	1	578431	ENSSSCG00000038931	C6ORF120	6.56827	5.62773	0.0155333	0.940539	Active	43.1686	40.6455	0.515052	30000	35000	Less activity	25.0922	12.0191	0.098665	13.0731	0.283193	0.331099	0.99935	0.9997	1	0.998201	0.998667	0.9998	-0.0124144	42.6852	45.1925	0.278552	-0.0821612	11.4763	10.4965	0.714873	0.127589
Higher RPS in Berkshire	1	578431	ENSSSCG00000038931	C6ORF120	6.56827	5.62773	0.0155333	0.940539	Active	43.1686	40.6455	0.515052	40000	45000	Less activity	31.0025	17.9981	0.0303239	13.0044	0.390622	0.141485	0.99935	0.9997	1	0.996154	0.996307	0.9992	-0.0126406	42.6852	45.1925	0.278552	-0.0821612	11.0464	9.12932	0.535	0.272278
Higher RPS in Berkshire	1	578431	ENSSSCG00000038931	C6ORF120	6.56827	5.62773	0.0155333	0.940539	Active	43.1686	40.6455	0.515052	45000	50000	Less activity	26.1191	13.3413	0.0470399	12.7778	0.745568	0.421953	0.99935	0.9997	1	0.997303	0.997701	0.9997	-0.0127719	42.6852	45.1925	0.278552	-0.0821612	5.16069	3.57299	0.158597	0.518295
Higher RPS in Berkshire	1	578431	ENSSSCG00000038931	C6ORF120	6.56827	5.62773	0.0155333	0.940539	Active	43.1686	40.6455	0.515052	200000	205000	Less activity	11.848	12.9234	0.872151	-1.07539	0.437385	0.24846	0.99935	0.9997	1	0.996799	0.998401	0.999799	-0.0181081	42.6852	45.1925	0.278552	-0.0821612	21.2243	18.4289	0.0789319	0.202727
Higher RPS in Berkshire	1	578479	ENSSSCG00000004008	WDR27	6.56827	5.62773	0.0155333	0.940539	Active	2.63545	1.54379	0.630605	25000	30000	Less activity	21.2262	19.9389	0.841819	1.28731	0.35914	0.586622	0.99935	0.9997	1	0.996101	0.9976	0.999533	-0.0123018	42.6852	45.1925	0.278552	-0.0821612	15.6753	17.498	0.64045	-0.157747
Higher RPS in Berkshire	1	578479	ENSSSCG00000004008	WDR27	6.56827	5.62773	0.0155333	0.940539	Active	2.63545	1.54379	0.630605	30000	35000	Less activity	25.0922	12.0191	0.098665	13.0731	0.657315	0.440811	0.99935	0.9997	1	0.998201	0.998667	0.9998	-0.0124144	42.6852	45.1925	0.278552	-0.0821612	11.4763	10.4965	0.714873	0.127589
Higher RPS in Berkshire	1	578479	ENSSSCG00000004008	WDR27	6.56827	5.62773	0.0155333	0.940539	Active	2.63545	1.54379	0.630605	40000	45000	Less activity	31.0025	17.9981	0.0303239	13.0044	0.192278	0.738468	0.99935	0.9997	1	0.996154	0.996307	0.9992	-0.0126406	42.6852	45.1925	0.278552	-0.0821612	11.0464	9.12932	0.535	0.272278
Higher RPS in Berkshire	1	578479	ENSSSCG00000004008	WDR27	6.56827	5.62773	0.0155333	0.940539	Active	2.63545	1.54379	0.630605	45000	50000	Less activity	26.1191	13.3413	0.0470399	12.7778	0.857931	0.524881	0.99935	0.9997	1	0.997303	0.997701	0.9997	-0.0127719	42.6852	45.1925	0.278552	-0.0821612	5.16069	3.57299	0.158597	0.518295
Higher RPS in Berkshire	1	578479	ENSSSCG00000004008	WDR27	6.56827	5.62773	0.0155333	0.940539	Active	2.63545	1.54379	0.630605	200000	205000	Less activity	11.848	12.9234	0.872151	-1.07539	0.253084	0.28514	0.99935	0.9997	1	0.996799	0.998401	0.999799	-0.0181081	42.6852	45.1925	0.278552	-0.0821612	21.2243	18.4289	0.0789319	0.202727
Higher RPS in Berkshire	1	31115043	ENSSSCG00000037590	TAAR8	4.35093	3.81063	0.0300315	0.540307	Inactive	0.0215706	0.0215706	-	31145000	31150000	Less activity	299.416	174.694	0.0057223	124.722	0.399615	0.34945	0.995601	0.993501	0.997434	0.995026	0.994735	0.994868	-0.00762	20.1167	12.1236	0.132383	0.725885	13.0696	12.6513	0.792872	0.0465698
Higher RPS in Berkshire	1	31115043	ENSSSCG00000037590	TAAR8	4.35093	3.81063	0.0300315	0.540307	Inactive	0.0215706	0.0215706	-	31155000	31160000	Less activity	74.253	42.7055	0.0871991	31.5475	0.543579	0.541156	0.995601	0.993501	0.997434	0.985737	0.994585	0.992914	-0.00245	20.1167	12.1236	0.132383	0.725885	21.384	29.5126	0.00786463	-0.462946
Higher RPS in Berkshire	1	85412056	ENSSSCG00000049631	Unknown	1.42546	0.139357	0.000152588	1.2861	Inactive	0.133676	0.133676	-	85295000	85300000	Less activity	27.2818	0.450278	0.0123628	26.8315	0.847211	0.712898	0.9977	0.9968	1	0.306	0.996318	0.9994	-0.00123182	5.16355	4.20115	0.231077	0.291314	3.48128	3.19963	0.854675	0.118171
Higher RPS in Berkshire	1	117400184	ENSSSCG00000051452	Unknown	2.78651	1.64295	0.018737	1.14356	Inactive	0.128262	0.128262	-	117265000	117270000	Less activity	23.0009	0.0699952	0.0266989	22.9309	0.757884	0.987764	0.9986	0.9999	0.9999	0.995001	0.999232	0.9999	0.00345	6.33719	7.92216	0.283928	-0.31756	13.7733	11.4657	0.302248	0.262462
Higher RPS in Berkshire	1	117400184	ENSSSCG00000051452	Unknown	2.78651	1.64295	0.018737	1.14356	Inactive	0.128262	0.128262	-	117305000	117310000	Less activity	0.234329	18.4791	0.0248568	-18.2448	0.842335	0.986559	0.9986	0.9999	0.9999	0.994757	1	0.9997	0.00534444	6.33719	7.92216	0.283928	-0.31756	11.1486	11.3515	0.956524	-0.0257903
Higher RPS in Berkshire	1	117400184	ENSSSCG00000051452	Unknown	2.78651	1.64295	0.018737	1.14356	Inactive	0.128262	0.128262	-	117425000	117430000	Less activity	29.0799	2.15565	0.0696404	26.9243	0.967394	0.943496	0.9986	0.9999	0.9999	0.99441	1	0.9998	-0.0007125	6.33719	7.92216	0.283928	-0.31756	3.24229	4.67802	0.259581	-0.515575
Higher RPS in Berkshire	1	119134313	ENSSSCG00000004620	MYO5A	8.60449	7.63566	0.0428852	0.968828	Active	45.0377	43.061	0.511219	118955000	118960000	Less activity	30.0536	14.5634	0.00969931	15.4901	0.907144	0.963441	0.97716	0.999796	0.998968	0.997701	0.9999	0.999767	0.00343529	25.7711	22.9464	0.0839087	0.166803	11.8436	10.7111	0.509349	0.14373
Higher RPS in Berkshire	1	119134313	ENSSSCG00000004620	MYO5A	8.60449	7.63566	0.0428852	0.968828	Active	45.0377	43.061	0.511219	118970000	118975000	High activity	15.1143	15.9715	0.831209	-0.857202	0.873346	0.808145	0.97716	0.999796	0.998968	0.99865	0.9999	0.999867	0.00375	25.7711	22.9464	0.0839087	0.166803	40.4162	47.2201	0.0268507	-0.223954
Higher RPS in Berkshire	1	119134313	ENSSSCG00000004620	MYO5A	8.60449	7.63566	0.0428852	0.968828	Active	45.0377	43.061	0.511219	119455000	119460000	Less activity	19.5019	9.1529	0.0133677	10.349	0.701252	0.766661	0.97716	0.999796	0.998968	0.995051	0.9994	0.997501	0.00098125	25.7711	22.9464	0.0839087	0.166803	17.2894	19.3687	0.554781	-0.162946
Higher RPS in Berkshire	1	119134313	ENSSSCG00000004620	MYO5A	8.60449	7.63566	0.0428852	0.968828	Active	45.0377	43.061	0.511219	119465000	119470000	Less activity	36.3911	23.2458	0.0648209	13.1453	0.647929	0.625146	0.97716	0.999796	0.998968	0.996209	0.998304	0.997372	0.000968939	25.7711	22.9464	0.0839087	0.166803	14.6107	14.7795	0.870947	-0.0164684
Higher RPS in Berkshire	1	119134313	ENSSSCG00000004620	MYO5A	8.60449	7.63566	0.0428852	0.968828	Active	45.0377	43.061	0.511219	119470000	119475000	Less activity	43.2051	43.3432	0.992183	-0.13811	0.777503	0.705285	0.97716	0.999796	0.998968	0.999	0.9997	0.9987	0.000936567	25.7711	22.9464	0.0839087	0.166803	7.35036	8.53015	0.353676	-0.212075
Higher RPS in Berkshire	1	119134313	ENSSSCG00000004620	MYO5A	8.60449	7.63566	0.0428852	0.968828	Active	45.0377	43.061	0.511219	119475000	119480000	Less activity	30.5573	27.5965	0.747519	2.96077	0.687706	0.936465	0.97716	0.999796	0.998968	0.99685	0.9999	0.9948	0.000922794	25.7711	22.9464	0.0839087	0.166803	9.44351	9.91765	0.475967	-0.0699519
Higher RPS in Berkshire	1	129968502	ENSSSCG00000004748	NDUFAF1	1.1459	0.661683	0.0315622	0.484215	Active	30.0066	26.175	0.5341	129605000	129610000	Less activity	15.7331	5.54409	0.0381792	10.189	0.240647	0.305315	0.997303	0.9998	1	0.9995	0.9999	0.9999	0.000649296	63.5133	61.1767	0.664047	0.0539904	1.24506	1.57012	0.681684	-0.312281
Higher RPS in Berkshire	1	130974667	ENSSSCG00000023975	CCDC9B	17.3519	15.1321	0.0478398	2.21985	Active	1.92653	2.40214	0.445063	129330000	129335000	Less activity	42.1987	0.28142	0.00213373	41.9173	0.665549	0.739597	0.997652	0.999301	0.9998	0.9962	0.995399	1	0.00100917	17.0271	18.3978	0.304912	-0.111069	14.328	15.3874	0.549192	-0.102222
Higher RPS in Berkshire	1	130974667	ENSSSCG00000023975	CCDC9B	17.3519	15.1321	0.0478398	2.21985	Active	1.92653	2.40214	0.445063	129335000	129340000	Less activity	18.2587	0.880509	0.0362667	17.3782	0.827527	0.741134	0.997652	0.999301	0.9998	0.990902	0.994601	1	0.00101242	17.0271	18.3978	0.304912	-0.111069	22.6085	24.9635	0.182167	-0.142356
Higher RPS in Berkshire	1	130974667	ENSSSCG00000023975	CCDC9B	17.3519	15.1321	0.0478398	2.21985	Active	1.92653	2.40214	0.445063	130865000	130870000	Less activity	15.0087	14.2006	0.940921	0.808103	0.805677	0.336987	0.997652	0.999301	0.9998	0.996163	0.996421	0.9995	0.000785	17.0271	18.3978	0.304912	-0.111069	23.1016	23.8949	0.892685	-0.0485004
Higher RPS in Berkshire	1	130974667	ENSSSCG00000023975	CCDC9B	17.3519	15.1321	0.0478398	2.21985	Active	1.92653	2.40214	0.445063	130880000	130885000	Less activity	40.6247	46.2976	0.534647	-5.67296	0.471985	0.593611	0.997652	0.999301	0.9998	0.986003	0.998062	0.994601	0.00112059	17.0271	18.3978	0.304912	-0.111069	15.7481	16.2428	0.839559	-0.044343
Higher RPS in Berkshire	1	130974667	ENSSSCG00000023975	CCDC9B	17.3519	15.1321	0.0478398	2.21985	Active	1.92653	2.40214	0.445063	130885000	130890000	Less activity	51.6532	66.9948	0.163206	-15.3417	0.565945	0.426489	0.997652	0.999301	0.9998	0.996501	0.996202	0.9995	0.0010875	17.0271	18.3978	0.304912	-0.111069	9.33796	9.77422	0.484526	-0.0651917
Higher RPS in Berkshire	1	130974667	ENSSSCG00000023975	CCDC9B	17.3519	15.1321	0.0478398	2.21985	Active	1.92653	2.40214	0.445063	130890000	130895000	Less activity	94.7137	89.9656	0.635448	4.74815	0.936775	0.841579	0.997652	0.999301	0.9998	0.992261	0.9964	0.999101	0.00110333	17.0271	18.3978	0.304912	-0.111069	33.8481	31.941	0.673118	0.0834084
Higher RPS in Berkshire	1	130974667	ENSSSCG00000023975	CCDC9B	17.3519	15.1321	0.0478398	2.21985	Active	1.92653	2.40214	0.445063	130895000	130900000	Less activity	64.1342	70.6657	0.335038	-6.53159	0.877045	0.956731	0.997652	0.999301	0.9998	0.979965	0.999365	0.972853	1.07143e-05	17.0271	18.3978	0.304912	-0.111069	37.1371	34.13	0.489216	0.121482
Higher RPS in Berkshire	1	130974667	ENSSSCG00000023975	CCDC9B	17.3519	15.1321	0.0478398	2.21985	Active	1.92653	2.40214	0.445063	130900000	130905000	Less activity	42.9985	49.2353	0.494021	-6.23679	0.869566	0.540589	0.997652	0.999301	0.9998	0.996527	0.998501	0.9999	1.53846e-05	17.0271	18.3978	0.304912	-0.111069	22.6714	24.3636	0.495557	-0.103415
Higher RPS in Berkshire	1	130974667	ENSSSCG00000023975	CCDC9B	17.3519	15.1321	0.0478398	2.21985	Active	1.92653	2.40214	0.445063	130905000	130910000	Less activity	42.3083	40.0527	0.763656	2.2556	0.778361	0.566718	0.997652	0.999301	0.9998	0.996851	0.9993	1	3.75e-05	17.0271	18.3978	0.304912	-0.111069	57.7593	38.696	0.00607434	0.576642
Higher RPS in Berkshire	1	130974667	ENSSSCG00000023975	CCDC9B	17.3519	15.1321	0.0478398	2.21985	Active	1.92653	2.40214	0.445063	130910000	130915000	Less activity	39.2975	37.8029	0.738148	1.49464	0.725981	0.518491	0.997652	0.999301	0.9998	0.996103	0.999201	1	0.0001	17.0271	18.3978	0.304912	-0.111069	134.229	99.9551	0.0126422	0.424974
Higher RPS in Berkshire	1	130974667	ENSSSCG00000023975	CCDC9B	17.3519	15.1321	0.0478398	2.21985	Active	1.92653	2.40214	0.445063	130915000	130920000	Less activity	36.1858	43.3307	0.280006	-7.14496	0.629694	0.43481	0.997652	0.999301	0.9998	0.995756	0.9999	1	0.00017	17.0271	18.3978	0.304912	-0.111069	53.8303	45.9077	0.0615871	0.229221
Higher RPS in Berkshire	1	179604921	ENSSSCG00000005009	KLHDC2	1.45735	1.05651	0.00293524	0.400844	Inactive	43.1311	43.9536	0.495277	179495000	179500000	Less activity	28.4092	10.5092	0.0140001	17.9	0.446109	0.403243	0.99885	0.998434	1	0.946553	0.928838	0.9999	0.0014475	7.31202	8.08629	0.731452	-0.143343	11.5095	8.62914	0.191724	0.411389
Higher RPS in Berkshire	1	236265973	ENSSSCG00000005308	RUSC2	3.79294	2.58751	0.031166	1.20543	Active	2.52272	2.26401	0.527024	236325000	236330000	Moderate activity	21.1329	22.5886	0.899656	-1.4557	0.435416	0.427256	0.993356	0.992745	0.9999	0.977917	0.993675	0.9999	0.000831818	167.401	156.497	0.52782	0.0971087	153.931	68.4945	0.0236963	1.16706
Higher RPS in Berkshire	1	236265973	ENSSSCG00000005308	RUSC2	3.79294	2.58751	0.031166	1.20543	Active	2.52272	2.26401	0.527024	236335000	236340000	Less activity	22.29	17.3545	0.561607	4.93557	0.532608	0.511209	0.993356	0.992745	0.9999	0.993804	0.997967	0.999633	3.46154e-05	167.401	156.497	0.52782	0.0971087	27.9117	26.7446	0.879839	0.0613976
Higher RPS in Berkshire	1	236265973	ENSSSCG00000005308	RUSC2	3.79294	2.58751	0.031166	1.20543	Active	2.52272	2.26401	0.527024	236620000	236625000	Less activity	23.0758	2.26649	0.0954245	20.8093	0.383381	0.485494	0.993356	0.992745	0.9999	0.99995	0.9999	1	0.001425	167.401	156.497	0.52782	0.0971087	0.62731	1.8715	0.236537	-1.43865
Higher RPS in Berkshire	1	236410471	ENSSSCG00000005316	TPM2	1.20034	0.25643	0.0418744	0.943911	Active	45.7918	45.2009	0.503247	236540000	236545000	Less activity	17.3007	1.13353	0.0512931	16.1671	0.364862	0.123481	0.994	0.994996	0.999867	0.993604	0.994803	0.999667	-0.001096	75.2964	83.0492	0.322305	-0.141206	24.6925	25.0978	0.869546	-0.0233926
Higher RPS in Berkshire	1	236450922	ENSSSCG00000005317	TLN1	3.81376	1.91999	0.0476315	1.89377	Active	49.3083	49.9894	0.496571	236535000	236540000	Less activity	30.8838	8.16813	0.103377	22.7157	0.709926	0.573514	0.997601	0.997934	0.9996	0.986605	0.989091	0.9997	-0.00148125	365.342	349.937	0.716192	0.0621338	91.3198	107.422	0.0276292	-0.234058
Higher RPS in Berkshire	1	236450922	ENSSSCG00000005317	TLN1	3.81376	1.91999	0.0476315	1.89377	Active	49.3083	49.9894	0.496571	236540000	236545000	Less activity	30.5959	11.8068	0.0354684	18.7891	0.433741	0.258208	0.997601	0.997934	0.9996	0.993604	0.994803	0.999667	-0.00129118	365.342	349.937	0.716192	0.0621338	24.6925	25.0978	0.869546	-0.0233926
Higher RPS in Berkshire	1	236450922	ENSSSCG00000005317	TLN1	3.81376	1.91999	0.0476315	1.89377	Active	49.3083	49.9894	0.496571	236620000	236625000	Less activity	26.6994	0	0.178656	26.6994	0.602311	0.299766	0.997601	0.997934	0.9996	0.99995	0.9999	1	0.00272576	365.342	349.937	0.716192	0.0621338	0.62731	1.8715	0.236537	-1.43865
Higher RPS in Berkshire	1	236450342	ENSSSCG00000005318	CREB3	3.81376	1.91999	0.0476315	1.89377	Active	55.2309	48.3568	0.53318	236535000	236540000	Less activity	30.8838	8.16813	0.103377	22.7157	0.0910158	0.120263	0.997601	0.997934	0.9996	0.986605	0.989091	0.9997	-0.00148125	365.342	349.937	0.716192	0.0621338	91.3198	107.422	0.0276292	-0.234058
Higher RPS in Berkshire	1	236450342	ENSSSCG00000005318	CREB3	3.81376	1.91999	0.0476315	1.89377	Active	55.2309	48.3568	0.53318	236540000	236545000	Less activity	30.5959	11.8068	0.0354684	18.7891	0.154128	0.218283	0.997601	0.997934	0.9996	0.993604	0.994803	0.999667	-0.00129118	365.342	349.937	0.716192	0.0621338	24.6925	25.0978	0.869546	-0.0233926
Higher RPS in Berkshire	1	236450342	ENSSSCG00000005318	CREB3	3.81376	1.91999	0.0476315	1.89377	Active	55.2309	48.3568	0.53318	236620000	236625000	Less activity	26.6994	0	0.178656	26.6994	0.682004	0.678365	0.997601	0.997934	0.9996	0.99995	0.9999	1	0.00272576	365.342	349.937	0.716192	0.0621338	0.62731	1.8715	0.236537	-1.43865
Higher RPS in Berkshire	1	261407716	ENSSSCG00000036639	STOM	8.44406	7.72898	0.0221624	0.715085	Active	59.4975	59.3907	0.500449	261350000	261355000	Moderate activity	40.006	25.5699	0.105354	14.4362	0.860831	0.881674	0.9953	0.997464	0.999667	0.994954	0.994109	0.996168	-0.00307	239.882	244.745	0.708313	-0.0289395	47.5033	47.5694	0.985896	-0.00199885
Higher RPS in Berkshire	1	261407716	ENSSSCG00000036639	STOM	8.44406	7.72898	0.0221624	0.715085	Active	59.4975	59.3907	0.500449	261355000	261360000	Moderate activity	46.1079	47.6844	0.881514	-1.57644	0.709347	0.710707	0.9953	0.997464	0.999667	0.987306	0.989751	0.986597	-0.00330556	239.882	244.745	0.708313	-0.0289395	37.2054	42.9804	0.295077	-0.207648
Higher RPS in Berkshire	1	261407716	ENSSSCG00000036639	STOM	8.44406	7.72898	0.0221624	0.715085	Active	59.4975	59.3907	0.500449	261360000	261365000	Moderate activity	72.3236	47.0069	0.0111905	25.3167	0.622465	0.838266	0.9953	0.997464	0.999667	0.980171	0.969759	0.997668	-0.00218125	239.882	244.745	0.708313	-0.0289395	46.9624	46.6265	0.859534	0.0103339
Higher RPS in Berkshire	1	261407716	ENSSSCG00000036639	STOM	8.44406	7.72898	0.0221624	0.715085	Active	59.4975	59.3907	0.500449	261365000	261370000	Moderate activity	52.2974	31.5016	0.0991376	20.7958	0.859492	0.445701	0.9953	0.997464	0.999667	0.989089	0.993535	0.996699	-0.00285	239.882	244.745	0.708313	-0.0289395	62.0644	62.5718	0.953984	-0.0117284
Higher RPS in Berkshire	1	261407716	ENSSSCG00000036639	STOM	8.44406	7.72898	0.0221624	0.715085	Active	59.4975	59.3907	0.500449	261370000	261375000	Moderate activity	41.3157	27.0959	0.0488887	14.2197	0.7098	0.565697	0.9953	0.997464	0.999667	0.991448	0.993836	0.994292	-0.00309167	239.882	244.745	0.708313	-0.0289395	45.8224	42.0659	0.271672	0.123123
Higher RPS in Berkshire	1	265570887	ENSSSCG00000005589	NR6A1	5.30207	4.85197	0.0422725	0.450103	Active	4.03207	2.76944	0.59282	265620000	265625000	Moderate activity	50.0327	30.1189	0.154348	19.9138	0.699636	0.716282	0.889854	0.962892	1	0.978098	0.976958	0.995502	-0.00213889	291.918	262.301	0.0215009	0.154285	45.0987	43.1786	0.358359	0.0626291
Higher RPS in Berkshire	1	265570887	ENSSSCG00000005589	NR6A1	5.30207	4.85197	0.0422725	0.450103	Active	4.03207	2.76944	0.59282	265625000	265630000	Moderate activity	62.9496	52.0213	0.218676	10.9283	0.752233	0.717574	0.889854	0.962892	1	0.995501	0.995235	0.9991	-0.001055	291.918	262.301	0.0215009	0.154285	41.415	39.5381	0.340457	0.0667448
Higher RPS in Berkshire	1	265570887	ENSSSCG00000005589	NR6A1	5.30207	4.85197	0.0422725	0.450103	Active	4.03207	2.76944	0.59282	265635000	265640000	Less activity	62.4635	48.3508	0.0852626	14.1127	0.874283	0.671781	0.889854	0.962892	1	0.921352	0.991399	0.999501	-0.000920833	291.918	262.301	0.0215009	0.154285	49.8673	47.5095	0.71525	0.0697348
Higher RPS in Berkshire	1	267942101	ENSSSCG00000005611	ZNF79	8.71046	8.26467	0.0224349	0.445792	Active	2.70695	2.40317	0.529724	267845000	267850000	Less activity	47.3352	50.1093	0.756554	-2.77405	0.698225	0.893589	0.9996	0.9999	0.9999	0.976483	0.963776	0.99737	0.0459528	13.6267	12.0836	0.390081	0.172046	26.7174	30.6005	0.314019	-0.195095
Higher RPS in Berkshire	1	267942101	ENSSSCG00000005611	ZNF79	8.71046	8.26467	0.0224349	0.445792	Active	2.70695	2.40317	0.529724	267850000	267855000	Less activity	75.673	65.5	0.0766667	10.173	0.83328	0.769612	0.9996	0.9999	0.9999	0.994026	0.9925	0.9989	0.0486382	13.6267	12.0836	0.390081	0.172046	18.7767	26.9997	0.070887	-0.521668
Higher RPS in Berkshire	1	267942101	ENSSSCG00000005611	ZNF79	8.71046	8.26467	0.0224349	0.445792	Active	2.70695	2.40317	0.529724	267855000	267860000	Less activity	90.9866	76.2888	0.0604209	14.6978	0.700518	0.439988	0.9996	0.9999	0.9999	0.990414	0.992132	0.995535	0.0516594	13.6267	12.0836	0.390081	0.172046	174.23	177.768	0.617533	-0.0289912
Higher RPS in Berkshire	1	267942101	ENSSSCG00000005611	ZNF79	8.71046	8.26467	0.0224349	0.445792	Active	2.70695	2.40317	0.529724	267860000	267865000	Less activity	49.428	31.1098	0.0109306	18.3182	0.728308	0.747922	0.9996	0.9999	0.9999	0.983575	0.98924	0.9976	0.05506	13.6267	12.0836	0.390081	0.172046	178.491	152.059	0.107378	0.231085
Higher RPS in Berkshire	1	267942101	ENSSSCG00000005611	ZNF79	8.71046	8.26467	0.0224349	0.445792	Active	2.70695	2.40317	0.529724	267865000	267870000	Less activity	30.0639	25.0744	0.0828394	4.98949	0.695254	0.516679	0.9996	0.9999	0.9999	0.969966	0.959695	0.9989	0.0600679	13.6267	12.0836	0.390081	0.172046	245.19	188.054	0.192966	0.382574
Higher RPS in Berkshire	1	269030458	ENSSSCG00000005655	DYNC2I2	2.9576	2.09519	0.0227657	0.862409	Active	1.12289	0.904606	0.553832	269115000	269120000	Less activity	33.8102	9.8467	0.000852873	23.9635	0.131348	0.426281	0.974677	0.972595	0.978959	0.969921	0.992612	1	0.00227188	247.091	226.014	0.0873628	0.128579	279.04	260.619	0.120858	0.0984941
Higher RPS in Berkshire	1	269030458	ENSSSCG00000005655	DYNC2I2	2.9576	2.09519	0.0227657	0.862409	Active	1.12289	0.904606	0.553832	269245000	269250000	Less activity	26.8966	23.5404	0.701288	3.35616	0.162786	0.296633	0.974677	0.972595	0.978959	0.988266	0.99142	0.9995	-0.000521429	247.091	226.014	0.0873628	0.128579	53.2448	56.3828	0.101124	-0.082466
Higher RPS in Berkshire	1	269134160	ENSSSCG00000005660	TBC1D13	3.06576	1.2309	0.000629182	1.83487	Active	9.25336	8.08793	0.533603	269020000	269025000	Less activity	32.6802	1.48399	0.00529946	31.1962	0.334127	0.259492	0.99114	0.993722	0.998165	0.981639	0.991157	0.993443	0.00172857	39.5503	50.4926	0.163574	-0.351595	41.2342	40.764	0.843919	0.0165038
Higher RPS in Berkshire	1	269134160	ENSSSCG00000005660	TBC1D13	3.06576	1.2309	0.000629182	1.83487	Active	9.25336	8.08793	0.533603	269025000	269030000	Less activity	34.4013	13.7339	0.0926117	20.6674	0.0883507	0.234131	0.99114	0.993722	0.998165	0.979754	0.998598	0.998001	0.001745	39.5503	50.4926	0.163574	-0.351595	37.3513	40.7046	0.259186	-0.123716
Higher RPS in Berkshire	1	269167196	ENSSSCG00000005662	SPOUT1	5.06364	4.30664	0.0193651	0.757001	Active	8.3071	9.0542	0.478484	269240000	269245000	Less activity	42.0744	26.2161	0.0484717	15.8584	0.336868	0.424845	0.888209	0.954171	0.9996	0.904682	0.989363	0.997375	0.00423571	300.245	261.099	0.264014	0.201475	156.742	174.473	0.473996	-0.154522
Higher RPS in Berkshire	1	269167196	ENSSSCG00000005662	SPOUT1	5.06364	4.30664	0.0193651	0.757001	Active	8.3071	9.0542	0.478484	269245000	269250000	Less activity	60.6444	29.8333	0.114245	30.8111	0.264904	0.0081493	0.888209	0.954171	0.9996	0.988266	0.99142	0.9995	0.00146667	300.245	261.099	0.264014	0.201475	53.2448	56.3828	0.101124	-0.082466
Higher RPS in Berkshire	1	269167196	ENSSSCG00000005662	SPOUT1	5.06364	4.30664	0.0193651	0.757001	Active	8.3071	9.0542	0.478484	269250000	269255000	Less activity	44.2654	27.4442	0.138255	16.8212	0.0146313	0.465021	0.888209	0.954171	0.9996	0.987551	0.990152	0.9998	0.00120312	300.245	261.099	0.264014	0.201475	40.3902	39.5193	0.861416	0.0313703
Higher RPS in Berkshire	13	5484544	ENSSSCG00000044480	Unknown	29.4473	13.6374	0.0466285	15.8099	Inactive	0.0553081	0.0553081	-	675000	680000	Less activity	6.08	6.08799	0.999408	-0.007995	0	0	1	1	1	0.993806	0.99281	1	-4.97396e-05	0.200267	0.232049	0.934021	-	16.2233	17.5249	0.414588	-0.110682
Higher RPS in Berkshire	13	5484544	ENSSSCG00000044480	Unknown	29.4473	13.6374	0.0466285	15.8099	Inactive	0.0553081	0.0553081	-	2255000	2260000	Less activity	19.4123	0	0.206447	19.4123	0	0	1	1	1	0.940791	0.988973	0.993936	-0.000387267	0.200267	0.232049	0.934021	-	25.5993	22.2771	0.368042	0.199702
Higher RPS in Berkshire	13	5484544	ENSSSCG00000044480	Unknown	29.4473	13.6374	0.0466285	15.8099	Inactive	0.0553081	0.0553081	-	3790000	3795000	Moderate activity	13.3834	0	0.181692	13.3834	0	0	1	1	1	0.991967	0.992652	0.998035	0.00265193	0.200267	0.232049	0.934021	-	19.8666	15.0623	0.180877	0.397107
Higher RPS in Berkshire	13	5484544	ENSSSCG00000044480	Unknown	29.4473	13.6374	0.0466285	15.8099	Inactive	0.0553081	0.0553081	-	4415000	4420000	Less activity	15.7678	4.51913	0.428647	11.2486	0	0	1	1	1	0.993957	0.996835	0.997103	0.00749788	0.200267	0.232049	0.934021	-	12.7318	11.8492	0.529126	0.102816
Higher RPS in Berkshire	13	5484544	ENSSSCG00000044480	Unknown	29.4473	13.6374	0.0466285	15.8099	Inactive	0.0553081	0.0553081	-	4510000	4515000	Less activity	9.43377	14.0489	0.771115	-4.61517	0	0	1	1	1	0.971573	0.966208	0.997002	0.00826788	0.200267	0.232049	0.934021	-	17.3926	17.9625	0.864091	-0.0462489
Higher RPS in Berkshire	13	5484544	ENSSSCG00000044480	Unknown	29.4473	13.6374	0.0466285	15.8099	Inactive	0.0553081	0.0553081	-	4585000	4590000	Less activity	14.7292	0	0.189858	14.7292	0	0	1	1	1	0.989901	0.998495	0.996205	0.0087677	0.200267	0.232049	0.934021	-	25.789	21.7138	0.0465343	0.247101
Higher RPS in Berkshire	13	5484544	ENSSSCG00000044480	Unknown	29.4473	13.6374	0.0466285	15.8099	Inactive	0.0553081	0.0553081	-	4720000	4725000	Less activity	19.8226	5.34444	0.152986	14.4782	0	0	1	1	1	0.993154	0.992472	0.998802	0.0106457	0.200267	0.232049	0.934021	-	12.8159	13.76	0.607506	-0.101772
Higher RPS in Berkshire	13	5484544	ENSSSCG00000044480	Unknown	29.4473	13.6374	0.0466285	15.8099	Inactive	0.0553081	0.0553081	-	4865000	4870000	Less activity	10.8963	12.4985	0.895607	-1.60223	0	0	1	1	1	0.964719	0.958814	0.99534	0.00131516	0.200267	0.232049	0.934021	-	23.6808	19.6309	0.310541	0.26934
Higher RPS in Berkshire	13	5484544	ENSSSCG00000044480	Unknown	29.4473	13.6374	0.0466285	15.8099	Inactive	0.0553081	0.0553081	-	4930000	4935000	Less activity	10.9394	5.93664	0.745849	5.00275	0	0	1	1	1	0.9973	1	0.997333	0.00129587	0.200267	0.232049	0.934021	-	8.32706	8.36955	0.951427	-0.00725421
Higher RPS in Berkshire	13	5484544	ENSSSCG00000044480	Unknown	29.4473	13.6374	0.0466285	15.8099	Inactive	0.0553081	0.0553081	-	4965000	4970000	Less activity	24.8652	3.18043	0.0636647	21.6847	0	0	1	1	1	0.965204	0.961505	0.998501	0.00164363	0.200267	0.232049	0.934021	-	20.986	22.3296	0.604506	-0.0891134
Higher RPS in Berkshire	13	5484544	ENSSSCG00000044480	Unknown	29.4473	13.6374	0.0466285	15.8099	Inactive	0.0553081	0.0553081	-	5015000	5020000	Less activity	15.0653	10.5354	0.843529	4.52989	0	0	1	1	1	0.997352	0.999334	0.998501	0.00225163	0.200267	0.232049	0.934021	-	8.34054	8.87912	0.530616	-0.0892375
Higher RPS in Berkshire	13	5484544	ENSSSCG00000044480	Unknown	29.4473	13.6374	0.0466285	15.8099	Inactive	0.0553081	0.0553081	-	5095000	5100000	Less activity	18.6643	0	0.213716	18.6643	0	0	1	1	1	0.992407	0.995236	0.993113	0.00215658	0.200267	0.232049	0.934021	-	16.8877	17.4506	0.838128	-0.04703
Higher RPS in Berkshire	13	5484544	ENSSSCG00000044480	Unknown	29.4473	13.6374	0.0466285	15.8099	Inactive	0.0553081	0.0553081	-	5110000	5115000	Less activity	6.85929	8.30464	0.914637	-1.44535	0	0	1	1	1	0.989647	0.993431	0.992396	0.00227397	0.200267	0.232049	0.934021	-	24.2267	23.3223	0.683445	0.0546595
Higher RPS in Berkshire	13	5484544	ENSSSCG00000044480	Unknown	29.4473	13.6374	0.0466285	15.8099	Inactive	0.0553081	0.0553081	-	5130000	5135000	Less activity	7.57179	11.8076	0.778222	-4.2358	0	0	1	1	1	0.979522	0.996304	0.990968	0.00230072	0.200267	0.232049	0.934021	-	29.3507	31.5663	0.244958	-0.104648
Higher RPS in Berkshire	13	5484544	ENSSSCG00000044480	Unknown	29.4473	13.6374	0.0466285	15.8099	Inactive	0.0553081	0.0553081	-	5160000	5165000	Less activity	25.6723	0	0.262258	25.6723	0	0	1	1	1	0.988293	0.98892	0.991078	0.00222857	0.200267	0.232049	0.934021	-	15.1409	17.5062	0.321242	-0.208135
Higher RPS in Berkshire	13	5484544	ENSSSCG00000044480	Unknown	29.4473	13.6374	0.0466285	15.8099	Inactive	0.0553081	0.0553081	-	5175000	5180000	Less activity	17.6679	1.07	0.106391	16.5979	0	0	1	1	1	0.982192	0.990444	0.991993	0.00211083	0.200267	0.232049	0.934021	-	28.7853	35.614	0.0919295	-0.306158
Higher RPS in Berkshire	13	5484544	ENSSSCG00000044480	Unknown	29.4473	13.6374	0.0466285	15.8099	Inactive	0.0553081	0.0553081	-	5210000	5215000	Less activity	29.3326	0	0.0855282	29.3326	0	0	1	1	1	0.990905	0.990276	0.995566	-0.000561321	0.200267	0.232049	0.934021	-	23.9342	26.2551	0.390957	-0.132992
Higher RPS in Berkshire	13	5484544	ENSSSCG00000044480	Unknown	29.4473	13.6374	0.0466285	15.8099	Inactive	0.0553081	0.0553081	-	5240000	5245000	Less activity	15.4883	16.3159	0.976583	-0.827545	0	0	1	1	1	0.98386	0.985272	0.990115	-0.000691489	0.200267	0.232049	0.934021	-	20.6584	18.5661	0.552812	0.153273
Higher RPS in Berkshire	13	5484544	ENSSSCG00000044480	Unknown	29.4473	13.6374	0.0466285	15.8099	Inactive	0.0553081	0.0553081	-	5255000	5260000	Less activity	15.2936	1.2792	0.179996	14.0144	0	0	1	1	1	0.993576	0.994934	0.992634	-0.0005625	0.200267	0.232049	0.934021	-	14.7133	18.3676	0.116682	-0.318106
Higher RPS in Berkshire	13	5484544	ENSSSCG00000044480	Unknown	29.4473	13.6374	0.0466285	15.8099	Inactive	0.0553081	0.0553081	-	5320000	5325000	Moderate activity	19.7549	6.87928	0.409418	12.8756	0	0	1	1	1	0.99301	0.993678	0.996568	-0.000632258	0.200267	0.232049	0.934021	-	47.0562	51.5382	0.300361	-0.130991
Higher RPS in Berkshire	13	5484544	ENSSSCG00000044480	Unknown	29.4473	13.6374	0.0466285	15.8099	Inactive	0.0553081	0.0553081	-	5400000	5405000	Less activity	43.9326	0.101871	0.215584	43.8308	0	0	1	1	1	0.998376	0.997969	0.999267	-0.00021	0.200267	0.232049	0.934021	-	7.89926	7.92913	0.971011	-0.00537893
Higher RPS in Berkshire	13	5484544	ENSSSCG00000044480	Unknown	29.4473	13.6374	0.0466285	15.8099	Inactive	0.0553081	0.0553081	-	5405000	5410000	Less activity	14.5498	0	0.182201	14.5498	0	0	1	1	1	0.997253	0.99687	0.997237	-0.000228571	0.200267	0.232049	0.934021	-	4.77399	3.89171	0.107885	0.288098
Higher RPS in Berkshire	13	5484544	ENSSSCG00000044480	Unknown	29.4473	13.6374	0.0466285	15.8099	Inactive	0.0553081	0.0553081	-	5510000	5515000	Less activity	55.2112	37.2901	0.590556	17.9211	0	0	1	1	1	0.993607	0.992745	0.997467	-0.05199	0.200267	0.232049	0.934021	-	10.5587	11.4055	0.75635	-0.110284
Higher RPS in Berkshire	13	5484544	ENSSSCG00000044480	Unknown	29.4473	13.6374	0.0466285	15.8099	Inactive	0.0553081	0.0553081	-	5515000	5520000	Less activity	43.1608	36.1913	0.0929651	6.9695	0	0	1	1	1	0.991486	0.992442	0.996705	-0.0432083	0.200267	0.232049	0.934021	-	15.083	13.4727	0.248681	0.161752
Higher RPS in Berkshire	13	5484544	ENSSSCG00000044480	Unknown	29.4473	13.6374	0.0466285	15.8099	Inactive	0.0553081	0.0553081	-	5520000	5525000	Less activity	28.5004	20.4454	0.543105	8.055	0	0	1	1	1	0.99172	0.993784	0.993682	-0.0369929	0.200267	0.232049	0.934021	-	15.761	15.7345	0.989802	0.00240992
Higher RPS in Berkshire	13	5484544	ENSSSCG00000044480	Unknown	29.4473	13.6374	0.0466285	15.8099	Inactive	0.0553081	0.0553081	-	5570000	5575000	Less activity	25.8272	0	0.204118	25.8272	0	0	1	1	1	0.99256	0.994307	0.997937	-0.0131088	0.200267	0.232049	0.934021	-	16.1341	16.9788	0.547511	-0.0731813
Higher RPS in Berkshire	13	5484544	ENSSSCG00000044480	Unknown	29.4473	13.6374	0.0466285	15.8099	Inactive	0.0553081	0.0553081	-	5590000	5595000	Less activity	8.53376	7.42067	0.936215	1.11309	0	0	1	1	1	0.927809	0.940154	0.962347	-0.0107286	0.200267	0.232049	0.934021	-	18.1616	15.1426	0.259168	0.260705
Higher RPS in Berkshire	13	5484544	ENSSSCG00000044480	Unknown	29.4473	13.6374	0.0466285	15.8099	Inactive	0.0553081	0.0553081	-	5675000	5680000	Less activity	2.63492	23.7599	0.226423	-21.125	0	0	1	1	1	0.996435	0.995812	0.996841	-0.00554079	0.200267	0.232049	0.934021	-	14.3455	13.926	0.87334	0.0425228
Higher RPS in Berkshire	13	5484544	ENSSSCG00000044480	Unknown	29.4473	13.6374	0.0466285	15.8099	Inactive	0.0553081	0.0553081	-	5730000	5735000	Less activity	29.0262	18.5965	0.766962	10.4297	0	0	1	1	1	0.993759	0.994508	0.9991	-0.00524898	0.200267	0.232049	0.934021	-	14.0035	13.6918	0.921843	0.0322508
Higher RPS in Berkshire	13	5484544	ENSSSCG00000044480	Unknown	29.4473	13.6374	0.0466285	15.8099	Inactive	0.0553081	0.0553081	-	5765000	5770000	Less activity	19.8576	3.95907	0.337479	15.8985	0	0	1	1	1	0.995952	0.996568	0.997068	-0.00460982	0.200267	0.232049	0.934021	-	10.953	10.5539	0.717066	0.0530575
Higher RPS in Berkshire	13	5484544	ENSSSCG00000044480	Unknown	29.4473	13.6374	0.0466285	15.8099	Inactive	0.0553081	0.0553081	-	5935000	5940000	Less activity	21.7818	9.60735	0.592117	12.1744	0	0	1	1	1	0.969297	0.948658	0.995467	-0.00397056	0.200267	0.232049	0.934021	-	10.7326	14.1254	0.231293	-0.393088
Higher RPS in Berkshire	13	5484544	ENSSSCG00000044480	Unknown	29.4473	13.6374	0.0466285	15.8099	Inactive	0.0553081	0.0553081	-	5975000	5980000	Less activity	13.9457	15.8764	0.932052	-1.93076	0	0	1	1	1	0.991976	0.993361	0.99361	-0.00371684	0.200267	0.232049	0.934021	-	13.1482	15.666	0.540686	-0.251027
Higher RPS in Berkshire	13	5484544	ENSSSCG00000044480	Unknown	29.4473	13.6374	0.0466285	15.8099	Inactive	0.0553081	0.0553081	-	6015000	6020000	Less activity	20.9318	0	0.062017	20.9318	0	0	1	1	1	0.99351	0.992644	0.995539	-0.00368868	0.200267	0.232049	0.934021	-	17.4212	17.4306	0.997596	-0.00077667
Higher RPS in Berkshire	13	5484544	ENSSSCG00000044480	Unknown	29.4473	13.6374	0.0466285	15.8099	Inactive	0.0553081	0.0553081	-	6105000	6110000	Less activity	6.79257	6.655	0.99079	0.137567	0	0	1	1	1	0.994683	0.992744	0.996672	-0.00253226	0.200267	0.232049	0.934021	-	12.882	12.5838	0.714941	0.033534
Higher RPS in Berkshire	13	5484544	ENSSSCG00000044480	Unknown	29.4473	13.6374	0.0466285	15.8099	Inactive	0.0553081	0.0553081	-	6130000	6135000	Less activity	15.834	5.58539	0.200107	10.2486	0	0	1	1	1	0.939456	0.993692	0.99532	-0.00364535	0.200267	0.232049	0.934021	-	15.6362	18.4433	0.505603	-0.236814
Higher RPS in Berkshire	13	5484544	ENSSSCG00000044480	Unknown	29.4473	13.6374	0.0466285	15.8099	Inactive	0.0553081	0.0553081	-	6205000	6210000	Moderate activity	13.0597	0	0.182174	13.0597	0	0	1	1	1	0.994224	0.993302	0.996331	-0.0031566	0.200267	0.232049	0.934021	-	16.5072	14.3164	0.361828	0.204091
Higher RPS in Berkshire	13	5484544	ENSSSCG00000044480	Unknown	29.4473	13.6374	0.0466285	15.8099	Inactive	0.0553081	0.0553081	-	6660000	6665000	Less activity	11.9917	8.79851	0.863586	3.19316	0	0	1	1	1	0.995706	0.994341	0.995972	-6.85106e-05	0.200267	0.232049	0.934021	-	10.7597	11.5072	0.82917	-0.0960396
Higher RPS in Berkshire	13	5484544	ENSSSCG00000044480	Unknown	29.4473	13.6374	0.0466285	15.8099	Inactive	0.0553081	0.0553081	-	6695000	6700000	Less activity	0	16.4026	0.186356	-16.4026	0	0	1	1	1	0.881813	0.774366	0.992382	-8.26446e-05	0.200267	0.232049	0.934021	-	15.093	13.9681	0.452047	0.110981
Higher RPS in Berkshire	13	5484544	ENSSSCG00000044480	Unknown	29.4473	13.6374	0.0466285	15.8099	Inactive	0.0553081	0.0553081	-	7210000	7215000	Less activity	10.1784	6.84968	0.827804	3.32869	0	0	1	1	1	0.991876	0.992901	0.993067	0.00257913	0.200267	0.232049	0.934021	-	11.8738	11.6403	0.910351	0.0284134
Higher RPS in Berkshire	13	5484544	ENSSSCG00000044480	Unknown	29.4473	13.6374	0.0466285	15.8099	Inactive	0.0553081	0.0553081	-	8025000	8030000	Less activity	11.4351	0	0.181691	11.4351	0	0	1	1	1	0.997076	0.997067	0.998168	0.00292648	0.200267	0.232049	0.934021	-	9.50941	9.47994	0.988222	0.00443142
Higher RPS in Berkshire	13	23957486	ENSSSCG00000024024	CX3CR1	8.20541	7.27266	0.00461605	0.93275	Active	11.9997	17.0163	0.413555	23880000	23885000	Less activity	23.3604	38.7185	0.204127	-15.358	0.629479	0.444972	0.972551	0.997805	0.963868	0.976921	0.981413	0.994686	-0.00231071	44.8993	50.1579	0.633388	-0.159446	39.8197	32.6602	0.154231	0.285155
Higher RPS in Berkshire	13	23957486	ENSSSCG00000024024	CX3CR1	8.20541	7.27266	0.00461605	0.93275	Active	11.9997	17.0163	0.413555	23885000	23890000	Less activity	52.5501	41.0955	0.565914	11.4546	0.58565	0.206878	0.972551	0.997805	0.963868	0.974504	0.996192	0.999267	-0.0034	44.8993	50.1579	0.633388	-0.159446	37.8907	26.9291	0.0863983	0.491136
Higher RPS in Berkshire	13	23957486	ENSSSCG00000024024	CX3CR1	8.20541	7.27266	0.00461605	0.93275	Active	11.9997	17.0163	0.413555	23895000	23900000	Less activity	66.2972	48.0904	0.489328	18.2068	0.632932	0.519308	0.972551	0.997805	0.963868	0.996904	0.995305	1	-0.00399545	44.8993	50.1579	0.633388	-0.159446	10.8588	10.7106	0.922781	0.0196361
Higher RPS in Berkshire	13	23957486	ENSSSCG00000024024	CX3CR1	8.20541	7.27266	0.00461605	0.93275	Active	11.9997	17.0163	0.413555	23900000	23905000	Less activity	55.3286	46.2927	0.734031	9.03591	0.499864	0.606311	0.972551	0.997805	0.963868	0.99795	0.9979	0.9998	-0.004425	44.8993	50.1579	0.633388	-0.159446	12.3338	10.6274	0.235199	0.212961
Higher RPS in Berkshire	13	23957486	ENSSSCG00000024024	CX3CR1	8.20541	7.27266	0.00461605	0.93275	Active	11.9997	17.0163	0.413555	23905000	23910000	Less activity	36.9818	32.2197	0.70841	4.76211	0.701929	0.382189	0.972551	0.997805	0.963868	0.996052	0.997802	0.9999	-0.0049	44.8993	50.1579	0.633388	-0.159446	19.8966	22.0434	0.62054	-0.147123
Higher RPS in Berkshire	13	32029329	ENSSSCG00000034357	DAG1	23.6211	21.6177	0.0433194	2.00339	Active	12.8514	12.8503	0.500021	31835000	31840000	Less activity	21.4242	6.99322	0.0927482	14.431	0.773068	0.682321	0.99795	0.9987	0.9992	0.996557	0.998304	0.9998	-0.000640541	116.22	115.37	0.633555	0.0105879	24.9929	20.9124	0.120206	0.256035
Higher RPS in Berkshire	13	32029329	ENSSSCG00000034357	DAG1	23.6211	21.6177	0.0433194	2.00339	Active	12.8514	12.8503	0.500021	31840000	31845000	Less activity	25.1269	16.1348	0.305896	8.99212	0.813614	0.369126	0.99795	0.9987	0.9992	0.99655	0.996832	0.9996	-0.000697222	116.22	115.37	0.633555	0.0105879	19.3272	15.9146	0.375605	0.278692
Higher RPS in Berkshire	13	32029329	ENSSSCG00000034357	DAG1	23.6211	21.6177	0.0433194	2.00339	Active	12.8514	12.8503	0.500021	31845000	31850000	Less activity	24.0529	18.6171	0.545565	5.43587	0.721134	0.601564	0.99795	0.9987	0.9992	0.9972	0.9986	0.9998	-0.000714286	116.22	115.37	0.633555	0.0105879	145.906	128.261	0.116038	0.185821
Higher RPS in Berkshire	13	32029329	ENSSSCG00000034357	DAG1	23.6211	21.6177	0.0433194	2.00339	Active	12.8514	12.8503	0.500021	31850000	31855000	Less activity	17.2287	30.1285	0.153321	-12.8997	0.646697	0.661255	0.99795	0.9987	0.9992	0.99795	0.999166	1	-0.000747059	116.22	115.37	0.633555	0.0105879	21.6282	19.0825	0.0301295	0.179778
Higher RPS in Berkshire	13	32029329	ENSSSCG00000034357	DAG1	23.6211	21.6177	0.0433194	2.00339	Active	12.8514	12.8503	0.500021	31855000	31860000	Less activity	24.7512	20.815	0.269597	3.93624	0.853975	0.329603	0.99795	0.9987	0.9992	0.9984	0.998533	1	-0.000775758	116.22	115.37	0.633555	0.0105879	11.8886	13.9548	0.350733	-0.2294
Higher RPS in Berkshire	13	32029329	ENSSSCG00000034357	DAG1	23.6211	21.6177	0.0433194	2.00339	Active	12.8514	12.8503	0.500021	31860000	31865000	Less activity	34.235	28.5726	0.441884	5.66241	0.82432	0.475322	0.99795	0.9987	0.9992	0.996851	0.998134	0.9997	-0.00079375	116.22	115.37	0.633555	0.0105879	16.8322	17.7483	0.378526	-0.0760171
Higher RPS in Berkshire	13	32029329	ENSSSCG00000034357	DAG1	23.6211	21.6177	0.0433194	2.00339	Active	12.8514	12.8503	0.500021	31865000	31870000	Less activity	27.2952	27.2299	0.994064	0.0652242	0.61377	0.551256	0.99795	0.9987	0.9992	0.99705	0.998033	0.9998	-0.000837097	116.22	115.37	0.633555	0.0105879	16.818	17.2143	0.877796	-0.0334092
Higher RPS in Berkshire	13	32029329	ENSSSCG00000034357	DAG1	23.6211	21.6177	0.0433194	2.00339	Active	12.8514	12.8503	0.500021	31870000	31875000	Less activity	25.0971	26.9808	0.878794	-1.8837	0.592494	0.280054	0.99795	0.9987	0.9992	0.99735	0.9961	0.9998	-0.000918333	116.22	115.37	0.633555	0.0105879	6.18166	7.41572	0.149274	-0.258766
Higher RPS in Berkshire	13	32029329	ENSSSCG00000034357	DAG1	23.6211	21.6177	0.0433194	2.00339	Active	12.8514	12.8503	0.500021	31875000	31880000	Less activity	28.4297	19.8454	0.36518	8.58432	0.698366	0.509961	0.99795	0.9987	0.9992	0.997501	0.997534	0.9998	-0.00095	116.22	115.37	0.633555	0.0105879	10.4228	12.1749	0.556763	-0.222189
Higher RPS in Berkshire	13	32029329	ENSSSCG00000034357	DAG1	23.6211	21.6177	0.0433194	2.00339	Active	12.8514	12.8503	0.500021	31880000	31885000	Less activity	27.5813	29.6834	0.702253	-2.10216	0.471862	0.666792	0.99795	0.9987	0.9992	0.9979	0.997867	0.9998	-0.0009875	116.22	115.37	0.633555	0.0105879	11.7587	10.1023	0.575772	0.217041
Higher RPS in Berkshire	13	32029329	ENSSSCG00000034357	DAG1	23.6211	21.6177	0.0433194	2.00339	Active	12.8514	12.8503	0.500021	31885000	31890000	Less activity	38.0782	22.3561	0.0405489	15.722	0.727472	0.842599	0.99795	0.9987	0.9992	0.995055	0.996837	1	-0.000948148	116.22	115.37	0.633555	0.0105879	11.1247	12.6152	0.222773	-0.179881
Higher RPS in Berkshire	13	32029329	ENSSSCG00000034357	DAG1	23.6211	21.6177	0.0433194	2.00339	Active	12.8514	12.8503	0.500021	31890000	31895000	Less activity	47.4751	31.7946	0.0519094	15.6805	0.668555	0.536376	0.99795	0.9987	0.9992	0.997751	0.997435	0.9998	-0.000973077	116.22	115.37	0.633555	0.0105879	13.0785	17.9724	0.421772	-0.455607
Higher RPS in Berkshire	13	32029329	ENSSSCG00000034357	DAG1	23.6211	21.6177	0.0433194	2.00339	Active	12.8514	12.8503	0.500021	31895000	31900000	Less activity	50.2011	35.5331	0.191052	14.668	0.775717	0.730649	0.99795	0.9987	0.9992	0.996851	0.996901	0.9998	-0.00102	116.22	115.37	0.633555	0.0105879	21.137	21.2936	0.969118	-0.0105996
Higher RPS in Berkshire	13	32029329	ENSSSCG00000034357	DAG1	23.6211	21.6177	0.0433194	2.00339	Active	12.8514	12.8503	0.500021	31905000	31910000	Less activity	45.3688	44.3909	0.925717	0.977937	0.70714	0.744606	0.99795	0.9987	0.9992	0.974417	0.966849	1	-2.17391e-06	116.22	115.37	0.633555	0.0105879	22.4251	19.3217	0.378882	0.213867
Higher RPS in Berkshire	13	32029329	ENSSSCG00000034357	DAG1	23.6211	21.6177	0.0433194	2.00339	Active	12.8514	12.8503	0.500021	31910000	31915000	Less activity	46.5015	39.1065	0.336485	7.39503	0.896994	0.873653	0.99795	0.9987	0.9992	0.997201	0.998933	0.9998	-2.95455e-05	116.22	115.37	0.633555	0.0105879	32.5157	34.6409	0.544373	-0.0910674
Higher RPS in Berkshire	13	32029329	ENSSSCG00000034357	DAG1	23.6211	21.6177	0.0433194	2.00339	Active	12.8514	12.8503	0.500021	31920000	31925000	Less activity	21.5389	19.6805	0.848638	1.85837	0.53538	0.695991	0.99795	0.9987	0.9992	0.994276	0.994613	0.999201	0.00014	116.22	115.37	0.633555	0.0105879	23.8699	16.839	0.128457	0.500877
Higher RPS in Berkshire	13	68467858	ENSSSCG00000011580	TSEN2	13.0968	12.1923	0.0459453	0.90449	Inactive	10.2437	10.8873	0.484772	68150000	68155000	Less activity	27.7248	17.2476	0.261705	10.4771	0.941629	0.511099	0.9989	0.999467	0.998733	0.982693	0.978714	0.997268	-0.00166613	5.86357	6.83926	0.652336	-0.218606	11.5198	10.0253	0.287602	0.19862
Higher RPS in Berkshire	13	68467858	ENSSSCG00000011580	TSEN2	13.0968	12.1923	0.0459453	0.90449	Inactive	10.2437	10.8873	0.484772	68155000	68160000	Less activity	31.3125	26.2477	0.382407	5.06488	0.773662	0.562958	0.9989	0.999467	0.998733	0.997701	0.998934	0.997934	-0.00168852	5.86357	6.83926	0.652336	-0.218606	5.49606	5.50825	0.988003	-0.00313988
Higher RPS in Berkshire	13	68467858	ENSSSCG00000011580	TSEN2	13.0968	12.1923	0.0459453	0.90449	Inactive	10.2437	10.8873	0.484772	68160000	68165000	Less activity	38.4602	29.5936	0.311635	8.86656	0.821269	0.674144	0.9989	0.999467	0.998733	0.997627	0.998734	0.997901	-0.00171583	5.86357	6.83926	0.652336	-0.218606	5.75268	5.07463	0.64612	0.177642
Higher RPS in Berkshire	13	68467858	ENSSSCG00000011580	TSEN2	13.0968	12.1923	0.0459453	0.90449	Inactive	10.2437	10.8873	0.484772	68165000	68170000	Less activity	46.2459	49.8147	0.82906	-3.56887	0.992677	0.834518	0.9989	0.999467	0.998733	0.996109	0.997603	0.997208	-0.00176356	5.86357	6.83926	0.652336	-0.218606	4.13429	5.04637	0.651395	-0.281434
Higher RPS in Berkshire	13	68467858	ENSSSCG00000011580	TSEN2	13.0968	12.1923	0.0459453	0.90449	Inactive	10.2437	10.8873	0.484772	68170000	68175000	Less activity	28.6514	34.4178	0.54622	-5.76641	0.713107	0.476839	0.9989	0.999467	0.998733	0.997425	0.998433	0.997967	-0.00180086	5.86357	6.83926	0.652336	-0.218606	14.5812	11.3765	0.462283	0.355279
Higher RPS in Berkshire	13	68467858	ENSSSCG00000011580	TSEN2	13.0968	12.1923	0.0459453	0.90449	Inactive	10.2437	10.8873	0.484772	68175000	68180000	Less activity	27.3105	22.2171	0.620125	5.09341	0.87059	0.832685	0.9989	0.999467	0.998733	0.991032	0.998128	0.989487	-0.00170877	5.86357	6.83926	0.652336	-0.218606	12.6349	10.2555	0.55932	0.298387
Higher RPS in Berkshire	13	68467858	ENSSSCG00000011580	TSEN2	13.0968	12.1923	0.0459453	0.90449	Inactive	10.2437	10.8873	0.484772	68180000	68185000	Less activity	29.4081	20.7903	0.152815	8.61779	0.732082	0.515396	0.9989	0.999467	0.998733	0.998601	0.998267	0.9988	-0.00173929	5.86357	6.83926	0.652336	-0.218606	10.625	10.4786	0.934818	0.0198228
Higher RPS in Berkshire	13	68467858	ENSSSCG00000011580	TSEN2	13.0968	12.1923	0.0459453	0.90449	Inactive	10.2437	10.8873	0.484772	68185000	68190000	Less activity	18.1226	15.2571	0.591184	2.86552	0.875737	0.743869	0.9989	0.999467	0.998733	0.997752	0.998101	0.997835	-0.00176909	5.86357	6.83926	0.652336	-0.218606	12.6707	12.1911	0.811115	0.0552245
Higher RPS in Berkshire	13	68467858	ENSSSCG00000011580	TSEN2	13.0968	12.1923	0.0459453	0.90449	Inactive	10.2437	10.8873	0.484772	68195000	68200000	Less activity	19.268	9.26954	0.0295129	9.99845	0.739857	0.513883	0.9989	0.999467	0.998733	0.948785	0.9978	0.932651	-0.000916981	5.86357	6.83926	0.652336	-0.218606	8.30488	13.8466	0.111977	-0.730617
Higher RPS in Berkshire	13	69895217	ENSSSCG00000040594	C3ORF20	25.6664	23.9406	0.0499498	1.72586	Inactive	0.0883944	0.0883944	-	69590000	69595000	Less activity	27.4224	26.0703	0.885144	1.3521	0.933977	0.903774	0.99855	0.998367	0.999233	0.997975	0.997767	0.998767	-0.000435833	6.35091	8.60581	0.390325	-0.432476	9.51182	6.84114	0.118024	0.469636
Higher RPS in Berkshire	13	69895217	ENSSSCG00000040594	C3ORF20	25.6664	23.9406	0.0499498	1.72586	Inactive	0.0883944	0.0883944	-	69595000	69600000	Less activity	30.3605	24.3844	0.267873	5.97602	0.923542	0.970501	0.99855	0.998367	0.999233	0.9968	0.997833	0.995733	-0.000429661	6.35091	8.60581	0.390325	-0.432476	15.0137	11.9318	0.189965	0.329001
Higher RPS in Berkshire	13	69895217	ENSSSCG00000040594	C3ORF20	25.6664	23.9406	0.0499498	1.72586	Inactive	0.0883944	0.0883944	-	69600000	69605000	Less activity	24.3792	20.1165	0.704339	4.26261	0.849446	0.957256	0.99855	0.998367	0.999233	0.953101	0.93789	0.937914	-0.000437069	6.35091	8.60581	0.390325	-0.432476	6.68135	7.80364	0.496182	-0.220944
Higher RPS in Berkshire	13	69895217	ENSSSCG00000040594	C3ORF20	25.6664	23.9406	0.0499498	1.72586	Inactive	0.0883944	0.0883944	-	69605000	69610000	Less activity	38.6726	30.5118	0.11626	8.16083	0.937948	0.985934	0.99855	0.998367	0.999233	0.983563	0.978697	0.97873	-0.000450877	6.35091	8.60581	0.390325	-0.432476	13.2738	11.5523	0.526102	0.198801
Higher RPS in Berkshire	13	69895217	ENSSSCG00000040594	C3ORF20	25.6664	23.9406	0.0499498	1.72586	Inactive	0.0883944	0.0883944	-	69610000	69615000	Less activity	61.5278	76.6689	0.624649	-15.1411	0.830139	0.97773	0.99855	0.998367	0.999233	0.9984	0.998367	0.998134	-0.000459821	6.35091	8.60581	0.390325	-0.432476	14.7657	14.3477	0.745793	0.0411479
Higher RPS in Berkshire	13	69895217	ENSSSCG00000040594	C3ORF20	25.6664	23.9406	0.0499498	1.72586	Inactive	0.0883944	0.0883944	-	69615000	69620000	Less activity	146.83	150.836	0.974592	-4.00582	0.935275	0.923178	0.99855	0.998367	0.999233	0.995952	0.997102	0.995701	-0.000466364	6.35091	8.60581	0.390325	-0.432476	29.9515	28.3789	0.346418	0.0775451
Higher RPS in Berkshire	13	69895217	ENSSSCG00000040594	C3ORF20	25.6664	23.9406	0.0499498	1.72586	Inactive	0.0883944	0.0883944	-	69620000	69625000	Less activity	65.2281	60.7326	0.418768	4.49552	0.917624	0.961741	0.99855	0.998367	0.999233	0.996325	0.9968	0.997233	-0.000460185	6.35091	8.60581	0.390325	-0.432476	22.78	22.6844	0.933979	0.00603751
Higher RPS in Berkshire	13	69895217	ENSSSCG00000040594	C3ORF20	25.6664	23.9406	0.0499498	1.72586	Inactive	0.0883944	0.0883944	-	69625000	69630000	Less activity	56.8901	47.6735	0.283909	9.21655	0.849944	0.96889	0.99855	0.998367	0.999233	0.996752	0.997668	0.996137	-0.000469811	6.35091	8.60581	0.390325	-0.432476	28.2397	33.8676	0.348315	-0.261336
Higher RPS in Berkshire	13	69895217	ENSSSCG00000040594	C3ORF20	25.6664	23.9406	0.0499498	1.72586	Inactive	0.0883944	0.0883944	-	69630000	69635000	Less activity	39.8425	28.5385	0.478977	11.304	0.715671	0.872287	0.99855	0.998367	0.999233	0.995527	0.998135	0.993435	-0.000432692	6.35091	8.60581	0.390325	-0.432476	83.7706	110.957	0.273828	-0.40506
Higher RPS in Berkshire	13	69895217	ENSSSCG00000040594	C3ORF20	25.6664	23.9406	0.0499498	1.72586	Inactive	0.0883944	0.0883944	-	69635000	69640000	Less activity	33.4631	28.1542	0.425386	5.30892	0.740022	0.770734	0.99855	0.998367	0.999233	0.996875	0.997567	0.996033	-0.000429412	6.35091	8.60581	0.390325	-0.432476	58.4249	64.0326	0.127833	-0.132006
Higher RPS in Berkshire	13	69895217	ENSSSCG00000040594	C3ORF20	25.6664	23.9406	0.0499498	1.72586	Inactive	0.0883944	0.0883944	-	69640000	69645000	Less activity	24.3675	21.0326	0.760443	3.33484	0.915294	0.773437	0.99855	0.998367	0.999233	0.997925	0.997101	0.9979	-0.000442	6.35091	8.60581	0.390325	-0.432476	15.3973	16.6654	0.732486	-0.113476
Higher RPS in Berkshire	13	69895217	ENSSSCG00000040594	C3ORF20	25.6664	23.9406	0.0499498	1.72586	Inactive	0.0883944	0.0883944	-	69645000	69650000	Moderate activity	26.4513	28.9019	0.751404	-2.45058	0.763838	0.732473	0.99855	0.998367	0.999233	0.997326	0.996534	0.996968	-0.000453061	6.35091	8.60581	0.390325	-0.432476	21.3454	19.3291	0.0736961	0.142448
Higher RPS in Berkshire	13	69895217	ENSSSCG00000040594	C3ORF20	25.6664	23.9406	0.0499498	1.72586	Inactive	0.0883944	0.0883944	-	69655000	69660000	Moderate activity	20.7784	17.8398	0.721773	2.93866	0.528114	0.635595	0.99855	0.998367	0.999233	0.996331	0.995109	0.996805	-0.000475532	6.35091	8.60581	0.390325	-0.432476	41.8818	50.6161	0.16561	-0.272678
Higher RPS in Berkshire	13	69895217	ENSSSCG00000040594	C3ORF20	25.6664	23.9406	0.0499498	1.72586	Inactive	0.0883944	0.0883944	-	69690000	69695000	Moderate activity	23.4102	20.7333	0.723098	2.67684	0.694832	0.7744	0.99855	0.998367	0.999233	0.998201	0.998368	0.998901	-0.00044125	6.35091	8.60581	0.390325	-0.432476	21.0399	20.5345	0.83303	0.0349118
Higher RPS in Berkshire	13	69895217	ENSSSCG00000040594	C3ORF20	25.6664	23.9406	0.0499498	1.72586	Inactive	0.0883944	0.0883944	-	69695000	69700000	Moderate activity	30.2299	18.8827	0.194329	11.3472	0.831736	0.913994	0.99855	0.998367	0.999233	0.998425	0.998634	0.998834	-0.000452564	6.35091	8.60581	0.390325	-0.432476	29.391	28.9852	0.842832	0.0199871
Higher RPS in Berkshire	13	69895217	ENSSSCG00000040594	C3ORF20	25.6664	23.9406	0.0499498	1.72586	Inactive	0.0883944	0.0883944	-	69710000	69715000	Less activity	15.2203	12.6025	0.493173	2.61781	0.946953	0.865131	0.99855	0.998367	0.999233	0.996926	0.996101	0.999367	-0.000470833	6.35091	8.60581	0.390325	-0.432476	17.9031	19.3528	0.148045	-0.111733
Higher RPS in Berkshire	13	69895217	ENSSSCG00000040594	C3ORF20	25.6664	23.9406	0.0499498	1.72586	Inactive	0.0883944	0.0883944	-	69715000	69720000	Less activity	16.3714	11.2741	0.524942	5.09738	0.886484	0.613746	0.99855	0.998367	0.999233	0.99925	0.998967	0.999867	-0.000484286	6.35091	8.60581	0.390325	-0.432476	9.64208	7.6303	0.183583	0.333704
Higher RPS in Berkshire	13	74180197	ENSSSCG00000011635	TMEM108	24.2544	22.4497	0.0409981	1.80478	Active	0.0682655	0.0682655	-	74260000	74265000	Moderate activity	21.2036	8.48661	0.15476	12.717	0.752074	0.909588	0.997751	0.998633	0.997969	0.99711	0.996578	0.998505	0.000596667	21.4228	21.7386	0.950184	-0.0210138	13.6861	14.1827	0.832647	-0.0510529
Higher RPS in Berkshire	13	74180197	ENSSSCG00000011635	TMEM108	24.2544	22.4497	0.0409981	1.80478	Active	0.0682655	0.0682655	-	74265000	74270000	Moderate activity	17.4327	20.4005	0.796468	-2.96781	0.74268	0.905403	0.997751	0.998633	0.997969	0.994971	0.993972	0.998067	0.000584375	21.4228	21.7386	0.950184	-0.0210138	25.7617	25.9312	0.947493	-0.00942123
Higher RPS in Berkshire	13	74180197	ENSSSCG00000011635	TMEM108	24.2544	22.4497	0.0409981	1.80478	Active	0.0682655	0.0682655	-	74275000	74280000	Less activity	14.1736	20.2351	0.402494	-6.06142	0.970796	0.860719	0.997751	0.998633	0.997969	0.991797	0.997414	0.987037	0.000402778	21.4228	21.7386	0.950184	-0.0210138	14.9816	14.2611	0.440809	0.0706188
Higher RPS in Berkshire	13	74180197	ENSSSCG00000011635	TMEM108	24.2544	22.4497	0.0409981	1.80478	Active	0.0682655	0.0682655	-	74280000	74285000	Less activity	19.5209	23.0872	0.768121	-3.56621	0.971024	0.95615	0.997751	0.998633	0.997969	0.986755	0.998294	0.977164	0.000655263	21.4228	21.7386	0.950184	-0.0210138	8.18511	11.5522	0.0768292	-0.492004
Higher RPS in Berkshire	13	74180197	ENSSSCG00000011635	TMEM108	24.2544	22.4497	0.0409981	1.80478	Active	0.0682655	0.0682655	-	74285000	74290000	Less activity	17.253	20.375	0.710098	-3.12197	0.971404	0.929658	0.997751	0.998633	0.997969	0.99725	0.998233	0.997467	0.00118	21.4228	21.7386	0.950184	-0.0210138	9.88424	9.66413	0.893896	0.0321618
Higher RPS in Berkshire	13	74180197	ENSSSCG00000011635	TMEM108	24.2544	22.4497	0.0409981	1.80478	Active	0.0682655	0.0682655	-	74290000	74295000	Less activity	15.5019	8.56593	0.402291	6.93598	0.867157	0.697492	0.997751	0.998633	0.997969	0.997376	0.997901	0.997234	0.0011	21.4228	21.7386	0.950184	-0.0210138	8.49374	8.7237	0.742425	-0.0380976
Higher RPS in Berkshire	13	74180197	ENSSSCG00000011635	TMEM108	24.2544	22.4497	0.0409981	1.80478	Active	0.0682655	0.0682655	-	74350000	74355000	Moderate activity	23.5557	12.2374	0.0972098	11.3183	0.760658	0.979063	0.997751	0.998633	0.997969	0.995856	0.998436	0.999733	0.000754545	21.4228	21.7386	0.950184	-0.0210138	31.1239	27.1236	0.402002	0.197793
Higher RPS in Berkshire	13	74180197	ENSSSCG00000011635	TMEM108	24.2544	22.4497	0.0409981	1.80478	Active	0.0682655	0.0682655	-	74380000	74385000	Less activity	22.0003	15.5453	0.351078	6.45492	0.664839	0.889584	0.997751	0.998633	0.997969	0.992551	0.997367	0.992302	0.000676923	21.4228	21.7386	0.950184	-0.0210138	12.3315	12.6487	0.778928	-0.0363493
Higher RPS in Berkshire	13	74180197	ENSSSCG00000011635	TMEM108	24.2544	22.4497	0.0409981	1.80478	Active	0.0682655	0.0682655	-	74385000	74390000	Less activity	18.6832	14.8274	0.408996	3.85579	0.907225	0.983395	0.997751	0.998633	0.997969	0.968538	0.996922	0.960749	0.000535	21.4228	21.7386	0.950184	-0.0210138	16.4237	13.5269	0.516975	0.278084
Higher RPS in Berkshire	13	74180197	ENSSSCG00000011635	TMEM108	24.2544	22.4497	0.0409981	1.80478	Active	0.0682655	0.0682655	-	74510000	74515000	Less activity	18.8325	13.2304	0.47143	5.60218	0.982109	0.712373	0.997751	0.998633	0.997969	0.996024	0.996732	0.997465	0.00101846	21.4228	21.7386	0.950184	-0.0210138	11.1861	12.2227	0.65106	-0.126778
Higher RPS in Berkshire	13	74180197	ENSSSCG00000011635	TMEM108	24.2544	22.4497	0.0409981	1.80478	Active	0.0682655	0.0682655	-	74520000	74525000	Less activity	18.8096	24.937	0.709736	-6.12741	0.914364	0.97557	0.997751	0.998633	0.997969	0.787228	0.578404	0.997332	-0.00242836	21.4228	21.7386	0.950184	-0.0210138	3.47423	2.72933	0.640066	0.337171
Higher RPS in Berkshire	13	74180197	ENSSSCG00000011635	TMEM108	24.2544	22.4497	0.0409981	1.80478	Active	0.0682655	0.0682655	-	74525000	74530000	Less activity	27.1843	17.874	0.20193	9.31025	0.907203	0.954653	0.997751	0.998633	0.997969	0.996775	0.997033	0.997766	-0.00547132	21.4228	21.7386	0.950184	-0.0210138	18.0319	15.9915	0.37892	0.17223
Higher RPS in Berkshire	13	74180197	ENSSSCG00000011635	TMEM108	24.2544	22.4497	0.0409981	1.80478	Active	0.0682655	0.0682655	-	74530000	74535000	Less activity	34.9108	27.7953	0.442407	7.11551	0.914253	0.872723	0.997751	0.998633	0.997969	0.9984	0.997967	0.999367	-0.00539058	21.4228	21.7386	0.950184	-0.0210138	10.0433	10.6542	0.78292	-0.0843662
Higher RPS in Berkshire	13	74180197	ENSSSCG00000011635	TMEM108	24.2544	22.4497	0.0409981	1.80478	Active	0.0682655	0.0682655	-	74535000	74540000	Less activity	45.4358	51.4981	0.62482	-6.06229	0.973875	0.871916	0.997751	0.998633	0.997969	0.997676	0.998267	0.997635	-0.00531286	21.4228	21.7386	0.950184	-0.0210138	11.8911	14.2872	0.286715	-0.262822
Higher RPS in Berkshire	13	74180197	ENSSSCG00000011635	TMEM108	24.2544	22.4497	0.0409981	1.80478	Active	0.0682655	0.0682655	-	74540000	74545000	Less activity	54.5891	68.8167	0.444366	-14.2276	0.92357	0.951301	0.997751	0.998633	0.997969	0.997128	0.99717	0.99737	-0.00523521	21.4228	21.7386	0.950184	-0.0210138	17.7375	17.5269	0.857613	0.0171367
Higher RPS in Berkshire	13	74180197	ENSSSCG00000011635	TMEM108	24.2544	22.4497	0.0409981	1.80478	Active	0.0682655	0.0682655	-	74545000	74550000	Less activity	45.8893	42.6263	0.434491	3.26298	0.86374	0.906823	0.997751	0.998633	0.997969	0.998401	0.998301	0.999233	-0.00516458	21.4228	21.7386	0.950184	-0.0210138	11.5983	10.7813	0.427904	0.104446
Higher RPS in Berkshire	13	74180197	ENSSSCG00000011635	TMEM108	24.2544	22.4497	0.0409981	1.80478	Active	0.0682655	0.0682655	-	74550000	74555000	Less activity	30.9512	30.2427	0.89133	0.708506	0.94275	0.830674	0.997751	0.998633	0.997969	0.998003	0.998502	0.998702	-0.00509726	21.4228	21.7386	0.950184	-0.0210138	8.80764	6.92992	0.18448	0.341536
Higher RPS in Berkshire	13	74180197	ENSSSCG00000011635	TMEM108	24.2544	22.4497	0.0409981	1.80478	Active	0.0682655	0.0682655	-	74585000	74590000	Less activity	21.0254	13.0814	0.120202	7.94392	0.949444	0.943699	0.997751	0.998633	0.997969	0.996956	0.996208	0.999035	-0.00466813	21.4228	21.7386	0.950184	-0.0210138	14.9635	13.8336	0.445148	0.112483
Higher RPS in Berkshire	13	79709825	ENSSSCG00000028562	FOXL2	1.91271	0.523634	0.0155986	1.38908	Active	0.0551272	0.0551272	-	79390000	79395000	Less activity	18.4632	6.84769	0.323042	11.6155	0.301886	0.804308	0.996651	0.996068	0.999767	0.99985	0.999867	0.9999	0.00547903	23.5903	24.8504	0.862328	-0.0747671	0.374412	0.878571	0.390251	-
Higher RPS in Berkshire	13	79709825	ENSSSCG00000028562	FOXL2	1.91271	0.523634	0.0155986	1.38908	Active	0.0551272	0.0551272	-	79880000	79885000	Less activity	42.4297	0	0.184098	42.4297	0.476172	0.947547	0.996651	0.996068	0.999767	1	1	1	-0.017175	23.5903	24.8504	0.862328	-0.0747671	0.124475	0.504595	0.544979	-
Higher RPS in Berkshire	13	96651960	ENSSSCG00000026579	LEKR1	16.6484	15.4301	0.00817376	1.21826	Active	1.40889	1.34461	0.511672	96500000	96505000	Moderate activity	17.9698	14.9784	0.586571	2.99138	0.949591	0.482752	0.996401	0.9998	1	0.9976	0.9982	1	0.00488621	101.326	117.207	0.0577002	-0.209858	10.8424	10.902	0.973769	-0.00783464
Higher RPS in Berkshire	13	96651960	ENSSSCG00000026579	LEKR1	16.6484	15.4301	0.00817376	1.21826	Active	1.40889	1.34461	0.511672	96505000	96510000	Moderate activity	22.8327	9.07996	0.0248765	13.7527	0.947534	0.661419	0.996401	0.9998	1	0.99895	0.999234	1	0.00507143	101.326	117.207	0.0577002	-0.209858	9.27474	6.43433	0.0969657	0.52074
Higher RPS in Berkshire	13	96651960	ENSSSCG00000026579	LEKR1	16.6484	15.4301	0.00817376	1.21826	Active	1.40889	1.34461	0.511672	96920000	96925000	Less activity	27.47	29.8807	0.676028	-2.41077	0.949054	0.640264	0.996401	0.9998	1	0.9977	0.9997	0.9999	0.000260377	101.326	117.207	0.0577002	-0.209858	21.067	24.6134	0.240089	-0.223476
Higher RPS in Berkshire	13	96651960	ENSSSCG00000026579	LEKR1	16.6484	15.4301	0.00817376	1.21826	Active	1.40889	1.34461	0.511672	96925000	96930000	Less activity	21.3127	25.8405	0.413851	-4.52779	0.888627	0.784999	0.996401	0.9998	1	0.993404	0.9998	0.9998	0.000251852	101.326	117.207	0.0577002	-0.209858	237.038	204.706	0.0156673	0.211467
Higher RPS in Berkshire	13	96651960	ENSSSCG00000026579	LEKR1	16.6484	15.4301	0.00817376	1.21826	Active	1.40889	1.34461	0.511672	96930000	96935000	Less activity	25.4234	18.4413	0.350419	6.98207	0.958453	0.464788	0.996401	0.9998	1	0.993917	0.998804	0.9998	0.000274545	101.326	117.207	0.0577002	-0.209858	119.164	121.134	0.860324	-0.0236261
Higher RPS in Berkshire	13	96651960	ENSSSCG00000026579	LEKR1	16.6484	15.4301	0.00817376	1.21826	Active	1.40889	1.34461	0.511672	96935000	96940000	Less activity	22.458	17.4714	0.252551	4.98665	0.846054	0.362608	0.996401	0.9998	1	0.9976	0.9984	1	0.00021875	101.326	117.207	0.0577002	-0.209858	209.348	221.691	0.36596	-0.0826064
Higher RPS in Berkshire	13	96651960	ENSSSCG00000026579	LEKR1	16.6484	15.4301	0.00817376	1.21826	Active	1.40889	1.34461	0.511672	96950000	96955000	Less activity	23.6327	14.6249	0.0264878	9.00783	0.944195	0.42249	0.996401	0.9998	1	0.99795	0.998567	1	0.000214407	101.326	117.207	0.0577002	-0.209858	97.4467	101.092	0.61504	-0.0529335
Higher RPS in Berkshire	13	96651960	ENSSSCG00000026579	LEKR1	16.6484	15.4301	0.00817376	1.21826	Active	1.40889	1.34461	0.511672	96955000	96960000	Less activity	19.1833	20.8368	0.825774	-1.65347	0.861607	0.774519	0.996401	0.9998	1	0.9979	0.997733	1	0.000214167	101.326	117.207	0.0577002	-0.209858	57.2858	53.0937	0.33307	0.109437
Higher RPS in Berkshire	13	96651960	ENSSSCG00000026579	LEKR1	16.6484	15.4301	0.00817376	1.21826	Active	1.40889	1.34461	0.511672	96960000	96965000	Less activity	30.4224	25.419	0.284465	5.00341	0.956854	0.542047	0.996401	0.9998	1	0.99805	0.999233	1	0.000222131	101.326	117.207	0.0577002	-0.209858	126.129	138.619	0.0280985	-0.136131
Higher RPS in Berkshire	13	96651960	ENSSSCG00000026579	LEKR1	16.6484	15.4301	0.00817376	1.21826	Active	1.40889	1.34461	0.511672	96965000	96970000	Less activity	32.403	23.7169	0.348865	8.6861	0.734021	0.765729	0.996401	0.9998	1	0.998502	0.998269	0.9998	0.000226613	101.326	117.207	0.0577002	-0.209858	37.8751	36.0507	0.182638	0.0710299
Higher RPS in Berkshire	13	96651960	ENSSSCG00000026579	LEKR1	16.6484	15.4301	0.00817376	1.21826	Active	1.40889	1.34461	0.511672	96970000	96975000	Less activity	33.3286	26.3971	0.0642351	6.93146	0.866388	0.709426	0.996401	0.9998	1	0.9977	0.998	1	0.000213492	101.326	117.207	0.0577002	-0.209858	92.1085	100.146	0.00721027	-0.120579
Higher RPS in Berkshire	13	96651960	ENSSSCG00000026579	LEKR1	16.6484	15.4301	0.00817376	1.21826	Active	1.40889	1.34461	0.511672	96975000	96980000	Moderate activity	19.6992	15.2724	0.41048	4.42679	0.924627	0.658895	0.996401	0.9998	1	0.99795	0.998566	1	0.000217969	101.326	117.207	0.0577002	-0.209858	9.60189	10.0637	0.896168	-0.0670901
Higher RPS in Berkshire	13	99067915	ENSSSCG00000011729	SCHIP1	3.79906	2.77367	0.0122548	1.02539	Inactive	5.89898	7.90051	0.427478	98610000	98615000	Less activity	17.5712	0.482043	0.0681286	17.0891	0.834711	0.728633	0.997304	0.998368	0.999501	0.916465	0.988119	0.9996	0.0130156	5.66153	6.00819	0.884843	-0.0842917	23.8773	21.5669	0.378349	0.146177
Higher RPS in Berkshire	13	99067915	ENSSSCG00000011729	SCHIP1	3.79906	2.77367	0.0122548	1.02539	Inactive	5.89898	7.90051	0.427478	98630000	98635000	Less activity	18.4478	21.7244	0.193508	-3.27653	0.298155	0.40479	0.997304	0.998368	0.999501	0.99525	0.996965	1	0.013582	5.66153	6.00819	0.884843	-0.0842917	20.981	19.8569	0.516923	0.0790557
Higher RPS in Berkshire	13	99067915	ENSSSCG00000011729	SCHIP1	3.79906	2.77367	0.0122548	1.02539	Inactive	5.89898	7.90051	0.427478	98635000	98640000	Less activity	22.1671	20.9172	0.861036	1.2499	0.406493	0.369224	0.997304	0.998368	0.999501	0.99715	0.9979	1	0.0137353	5.66153	6.00819	0.884843	-0.0842917	14.5389	13.5875	0.520911	0.0969433
Higher RPS in Berkshire	13	99925375	ENSSSCG00000035935	C3ORF80	4.86085	1.29149	0.0392307	3.56936	Active	0.0339312	0.0339312	-	99815000	99820000	Less activity	13.8148	0	0.1818	13.8148	0.78411	0.844971	0.99835	0.9989	0.999133	0.99394	0.990506	0.999667	0.00271429	35.8888	42.4865	0.0887924	-0.242849	11.566	12.9983	0.218112	-0.167069
Higher RPS in Berkshire	13	99925375	ENSSSCG00000035935	C3ORF80	4.86085	1.29149	0.0392307	3.56936	Active	0.0339312	0.0339312	-	99845000	99850000	Less activity	22.9187	1.69312	0.0594728	21.2256	0.736362	0.692986	0.99835	0.9989	0.999133	0.995484	0.995776	0.9997	0.00363667	35.8888	42.4865	0.0887924	-0.242849	13.2919	11.4782	0.19224	0.209945
Higher RPS in Berkshire	13	99925375	ENSSSCG00000035935	C3ORF80	4.86085	1.29149	0.0392307	3.56936	Active	0.0339312	0.0339312	-	99860000	99865000	Less activity	16.7825	8.75625	0.438054	8.02622	0.891451	0.750808	0.99835	0.9989	0.999133	0.993821	0.994521	0.9997	0.00472917	35.8888	42.4865	0.0887924	-0.242849	16.0413	17.2965	0.226215	-0.108043
Higher RPS in Berkshire	13	99925375	ENSSSCG00000035935	C3ORF80	4.86085	1.29149	0.0392307	3.56936	Active	0.0339312	0.0339312	-	99985000	99990000	Less activity	13.8743	6.63137	0.543724	7.2429	0.868757	0.605381	0.99835	0.9989	0.999133	0.99625	0.995867	0.9997	0.000418182	35.8888	42.4865	0.0887924	-0.242849	12.8653	12.2729	0.774915	0.0674685
Higher RPS in Berkshire	13	99925375	ENSSSCG00000035935	C3ORF80	4.86085	1.29149	0.0392307	3.56936	Active	0.0339312	0.0339312	-	99995000	100000000	Less activity	16.9328	0.255098	0.115028	16.6777	0.786761	0.503402	0.99835	0.9989	0.999133	0.993272	0.992889	0.9999	0.000461538	35.8888	42.4865	0.0887924	-0.242849	13.9146	14.9314	0.809407	-0.10105
Higher RPS in Berkshire	13	125338850	ENSSSCG00000033815	SST	6.98581	4.83948	0.0390743	2.14633	Inactive	0.0203983	0.0203983	-	125040000	125045000	Moderate activity	21.3011	12.7074	0.243616	8.59375	0.219908	0.31301	0.9988	0.9986	1	0.998101	0.999867	0.999467	-0.00293966	5.23321	5.71276	0.786938	-0.12422	29.67	35.4773	0.134397	-0.257099
Higher RPS in Berkshire	13	125338850	ENSSSCG00000033815	SST	6.98581	4.83948	0.0390743	2.14633	Inactive	0.0203983	0.0203983	-	125045000	125050000	Moderate activity	23.6601	21.2485	0.81388	2.41155	0.567622	0.377629	0.9988	0.9986	1	0.990957	0.999767	1	-0.00297018	5.23321	5.71276	0.786938	-0.12422	65.121	85.3959	0.169012	-0.390517
Higher RPS in Berkshire	13	125338850	ENSSSCG00000033815	SST	6.98581	4.83948	0.0390743	2.14633	Inactive	0.0203983	0.0203983	-	125055000	125060000	Moderate activity	32.5246	20.2079	0.0300118	12.3167	0.552558	0.288621	0.9988	0.9986	1	0.9965	0.9996	1	-0.00310364	5.23321	5.71276	0.786938	-0.12422	19.9989	18.482	0.593645	0.113213
Higher RPS in Berkshire	13	125338850	ENSSSCG00000033815	SST	6.98581	4.83948	0.0390743	2.14633	Inactive	0.0203983	0.0203983	-	125360000	125365000	Less activity	23.9769	4.28529	0.0463143	19.6917	0.617077	0.547134	0.9988	0.9986	1	0.993104	0.996334	1	0.00065	5.23321	5.71276	0.786938	-0.12422	17.8634	19.9084	0.650612	-0.155547
Higher RPS in Berkshire	13	125338850	ENSSSCG00000033815	SST	6.98581	4.83948	0.0390743	2.14633	Inactive	0.0203983	0.0203983	-	125365000	125370000	Less activity	25.957	8.12296	0.0779914	17.834	0.546922	0.316759	0.9988	0.9986	1	0.9946	0.996998	1	0.0006	5.23321	5.71276	0.786938	-0.12422	17.1721	18.1161	0.740336	-0.0767677
Higher RPS in Berkshire	13	130093805	ENSSSCG00000041365	Unknown	14.7403	13.707	0.00178757	1.03332	Inactive	-	-	-	129875000	129880000	Less activity	17.1217	13.0725	0.503024	4.04917	0.752728	0.874489	0.991305	0.995868	0.999867	0.997753	0.997337	0.998167	-0.000789286	25.6045	22.6061	0.572386	0.178939	9.14186	11.2228	0.61939	-0.292981
Higher RPS in Berkshire	13	130093805	ENSSSCG00000041365	Unknown	14.7403	13.707	0.00178757	1.03332	Inactive	-	-	-	129880000	129885000	Less activity	24.3395	18.7807	0.271178	5.55879	0.871524	0.954566	0.991305	0.995868	0.999867	0.994002	0.992699	0.998167	-0.000884146	25.6045	22.6061	0.572386	0.178939	16.0543	17.5437	0.70424	-0.127237
Higher RPS in Berkshire	13	130093805	ENSSSCG00000041365	Unknown	14.7403	13.707	0.00178757	1.03332	Inactive	-	-	-	129885000	129890000	Less activity	28.4585	25.9663	0.490982	2.49225	0.79611	0.552337	0.991305	0.995868	0.999867	0.88917	0.88708	0.859426	0.00034375	25.6045	22.6061	0.572386	0.178939	20.8871	19.9017	0.805509	0.0693854
Higher RPS in Berkshire	13	130093805	ENSSSCG00000041365	Unknown	14.7403	13.707	0.00178757	1.03332	Inactive	-	-	-	129890000	129895000	Less activity	42.9307	34.9064	0.34159	8.02427	0.9827	0.788173	0.991305	0.995868	0.999867	0.995439	0.995716	0.996276	0.000396154	25.6045	22.6061	0.572386	0.178939	17.8668	15.7613	0.381149	0.179825
Higher RPS in Berkshire	13	130093805	ENSSSCG00000041365	Unknown	14.7403	13.707	0.00178757	1.03332	Inactive	-	-	-	129895000	129900000	Moderate activity	42.4549	48.1932	0.109156	-5.73832	0.720091	0.794191	0.991305	0.995868	0.999867	0.895775	0.896835	0.864892	0.00171974	25.6045	22.6061	0.572386	0.178939	23.666	23.6703	0.996936	-0.000264039
Higher RPS in Berkshire	13	130093805	ENSSSCG00000041365	Unknown	14.7403	13.707	0.00178757	1.03332	Inactive	-	-	-	129900000	129905000	Moderate activity	46.7447	39.1505	0.362333	7.59424	0.778945	0.773739	0.991305	0.995868	0.999867	0.993626	0.992767	0.996468	0.00175946	25.6045	22.6061	0.572386	0.178939	44.2559	41.2131	0.420235	0.102527
Higher RPS in Berkshire	13	130093805	ENSSSCG00000041365	Unknown	14.7403	13.707	0.00178757	1.03332	Inactive	-	-	-	129905000	129910000	Less activity	43.3483	28.0227	0.0929777	15.3256	0.958939	0.716067	0.991305	0.995868	0.999867	0.990885	0.995215	0.997902	0.0018875	25.6045	22.6061	0.572386	0.178939	45.8562	46.8663	0.778496	-0.0313672
Higher RPS in Berkshire	13	130093805	ENSSSCG00000041365	Unknown	14.7403	13.707	0.00178757	1.03332	Inactive	-	-	-	129910000	129915000	Less activity	29.5066	19.4802	0.140303	10.0264	0.872469	0.973788	0.991305	0.995868	0.999867	0.989877	0.995938	0.993784	0.00195	25.6045	22.6061	0.572386	0.178939	89.9195	84.821	0.228699	0.0841162
Higher RPS in Berkshire	13	130093805	ENSSSCG00000041365	Unknown	14.7403	13.707	0.00178757	1.03332	Inactive	-	-	-	129915000	129920000	Less activity	27.7487	17.9173	0.393022	9.83142	0.934512	0.840523	0.991305	0.995868	0.999867	0.991109	0.998001	0.998134	0.00201912	25.6045	22.6061	0.572386	0.178939	126.706	113.498	0.119817	0.158685
Higher RPS in Berkshire	13	130093805	ENSSSCG00000041365	Unknown	14.7403	13.707	0.00178757	1.03332	Inactive	-	-	-	129920000	129925000	Less activity	20.7298	15.4826	0.218561	5.24717	0.964875	0.885412	0.991305	0.995868	0.999867	0.992566	0.99677	0.996675	0.0020803	25.6045	22.6061	0.572386	0.178939	80.0407	66.2064	0.35803	0.273388
Higher RPS in Berkshire	13	138978463	ENSSSCG00000036613	POLQ	15.2533	14.417	0.00556864	0.83633	Active	9.19518	8.95453	0.50663	138555000	138560000	Less activity	21.6539	17.3221	0.481006	4.33186	0.920373	0.937947	0.986944	0.977804	0.9997	0.998751	0.998335	0.999167	0.00245843	81.7737	72.6602	0.177219	0.17025	5.16191	5.65721	0.681587	-0.129782
Higher RPS in Berkshire	13	138978463	ENSSSCG00000036613	POLQ	15.2533	14.417	0.00556864	0.83633	Active	9.19518	8.95453	0.50663	138560000	138565000	Less activity	25.2537	22.924	0.56317	2.32971	0.800669	0.667968	0.986944	0.977804	0.9997	0.997657	0.99701	0.998272	0.00248963	81.7737	72.6602	0.177219	0.17025	6.69094	5.58796	0.225249	0.255699
Higher RPS in Berkshire	13	138978463	ENSSSCG00000036613	POLQ	15.2533	14.417	0.00556864	0.83633	Active	9.19518	8.95453	0.50663	138565000	138570000	Less activity	21.0878	13.8984	0.170281	7.18938	0.738371	0.816596	0.986944	0.977804	0.9997	0.997827	0.997636	0.998668	0.00251667	81.7737	72.6602	0.177219	0.17025	10.4007	9.80029	0.669326	0.0849493
Higher RPS in Berkshire	13	138978463	ENSSSCG00000036613	POLQ	15.2533	14.417	0.00556864	0.83633	Active	9.19518	8.95453	0.50663	138630000	138635000	Less activity	24.9706	18.5331	0.425533	6.43747	0.520289	0.612496	0.986944	0.977804	0.9997	0.985484	0.999394	0.971518	0.00210662	81.7737	72.6602	0.177219	0.17025	8.55164	11.0162	0.433984	-0.361625
Higher RPS in Berkshire	13	138978463	ENSSSCG00000036613	POLQ	15.2533	14.417	0.00556864	0.83633	Active	9.19518	8.95453	0.50663	138635000	138640000	Less activity	26.6789	26.728	0.988846	-0.0490994	0.818916	0.71588	0.986944	0.977804	0.9997	0.98425	0.996595	0.971183	0.00235075	81.7737	72.6602	0.177219	0.17025	6.8367	5.87737	0.295539	0.214737
Higher RPS in Berkshire	13	138978463	ENSSSCG00000036613	POLQ	15.2533	14.417	0.00556864	0.83633	Active	9.19518	8.95453	0.50663	138640000	138645000	Less activity	19.2107	17.9786	0.845496	1.23207	0.960115	0.938667	0.986944	0.977804	0.9997	0.997524	0.996431	0.998767	0.00237576	81.7737	72.6602	0.177219	0.17025	7.6708	5.6948	0.359545	0.423305
Higher RPS in Berkshire	13	138978463	ENSSSCG00000036613	POLQ	15.2533	14.417	0.00556864	0.83633	Active	9.19518	8.95453	0.50663	138860000	138865000	Less activity	31.2966	22.4048	0.100469	8.89182	0.919869	0.742618	0.986944	0.977804	0.9997	0.994806	0.993009	0.998867	0.00616818	81.7737	72.6602	0.177219	0.17025	10.8287	9.91651	0.530052	0.125748
Higher RPS in Berkshire	13	138978463	ENSSSCG00000036613	POLQ	15.2533	14.417	0.00556864	0.83633	Active	9.19518	8.95453	0.50663	138865000	138870000	Less activity	27.205	22.023	0.379126	5.182	0.894523	0.872109	0.986944	0.977804	0.9997	0.99205	0.990399	0.993167	0.00642381	81.7737	72.6602	0.177219	0.17025	23.2542	23.0008	0.961515	0.0157353
Higher RPS in Berkshire	13	138978463	ENSSSCG00000036613	POLQ	15.2533	14.417	0.00556864	0.83633	Active	9.19518	8.95453	0.50663	138880000	138885000	Less activity	24.5693	22.9789	0.465967	1.59047	0.871272	0.834835	0.986944	0.977804	0.9997	0.996326	0.994634	0.999433	0.00736944	81.7737	72.6602	0.177219	0.17025	78.9029	91.4684	0.11294	-0.212943
Higher RPS in Berkshire	13	138978463	ENSSSCG00000036613	POLQ	15.2533	14.417	0.00556864	0.83633	Active	9.19518	8.95453	0.50663	138885000	138890000	Less activity	25.7733	18.7619	0.175462	7.01139	0.915031	0.71967	0.986944	0.977804	0.9997	0.997706	0.998072	0.997008	0.00783235	81.7737	72.6602	0.177219	0.17025	62.3232	95.3427	0.347439	-0.612552
Higher RPS in Berkshire	13	138978463	ENSSSCG00000036613	POLQ	15.2533	14.417	0.00556864	0.83633	Active	9.19518	8.95453	0.50663	138890000	138895000	Less activity	19.3554	23.0113	0.306331	-3.65593	0.832362	0.817518	0.986944	0.977804	0.9997	0.997033	0.997009	0.997506	0.00831563	81.7737	72.6602	0.177219	0.17025	9.31087	10.4085	0.714927	-0.159149
Higher RPS in Berkshire	13	182409472	ENSSSCG00000033025	C21ORF91	3.78953	3.18792	0.01564	0.601609	Active	104.852	104.763	0.500211	182305000	182310000	Less activity	18.9812	13.3713	0.0338006	5.60992	0.646325	0.476295	0.996551	0.999567	0.999867	0.99645	0.9985	0.9998	0.00100526	669.633	743.208	0.0359293	-0.150375	23.0128	19.6587	0.0560965	0.226208
Higher RPS in Berkshire	13	182409472	ENSSSCG00000033025	C21ORF91	3.78953	3.18792	0.01564	0.601609	Active	104.852	104.763	0.500211	182320000	182325000	Less activity	20.9554	9.21663	0.0888781	11.7387	0.724678	0.405884	0.996551	0.999567	0.999867	0.954682	0.967786	0.9997	0.0034375	669.633	743.208	0.0359293	-0.150375	16.2913	15.6202	0.800172	0.060312
Higher RPS in Berkshire	13	182409472	ENSSSCG00000033025	C21ORF91	3.78953	3.18792	0.01564	0.601609	Active	104.852	104.763	0.500211	182470000	182475000	Moderate activity	20.0565	14.8315	0.482169	5.22499	0.662075	0.442122	0.996551	0.999567	0.999867	0.984296	0.993464	0.99246	0.0005125	669.633	743.208	0.0359293	-0.150375	46.5706	53.111	0.309789	-0.189211
Higher RPS in Berkshire	13	182409183	ENSSSCG00000012018	CHODL	3.78953	3.18792	0.01564	0.601609	Active	1.6927	1.09536	0.607125	182305000	182310000	Less activity	18.9812	13.3713	0.0338006	5.60992	0.818407	0.685253	0.996551	0.999567	0.999867	0.99645	0.9985	0.9998	0.00100526	669.633	743.208	0.0359293	-0.150375	23.0128	19.6587	0.0560965	0.226208
Higher RPS in Berkshire	13	182409183	ENSSSCG00000012018	CHODL	3.78953	3.18792	0.01564	0.601609	Active	1.6927	1.09536	0.607125	182320000	182325000	Less activity	20.9554	9.21663	0.0888781	11.7387	0.93691	0.843432	0.996551	0.999567	0.999867	0.954682	0.967786	0.9997	0.0034375	669.633	743.208	0.0359293	-0.150375	16.2913	15.6202	0.800172	0.060312
Higher RPS in Berkshire	13	182409183	ENSSSCG00000012018	CHODL	3.78953	3.18792	0.01564	0.601609	Active	1.6927	1.09536	0.607125	182470000	182475000	Moderate activity	20.0565	14.8315	0.482169	5.22499	0.919597	0.880553	0.996551	0.999567	0.999867	0.984296	0.993464	0.99246	0.0005125	669.633	743.208	0.0359293	-0.150375	46.5706	53.111	0.309789	-0.189211
Higher RPS in Berkshire	13	193778714	ENSSSCG00000037128	KRTAP13-4	1.50591	0	0.00107133	1.50591	Inactive	0.0248222	0.0248222	-	193750000	193755000	Less activity	34.6271	0	0.0291716	34.6271	0.844564	0.703624	0.772851	0.995071	1	0.973031	0.96117	1	0.0293625	22.1614	24.9367	0.406937	-0.169503	22.864	22.0986	0.716111	0.0489004
Higher RPS in Berkshire	13	207348449	ENSSSCG00000028768	KRTAP9-1	2.09943	0.602759	0.0221274	1.49667	Inactive	0	0	-	207450000	207455000	Less activity	22.3697	0	0.0997547	22.3697	0.517853	0.501609	0.990052	0.988974	0.9935	0.985598	0.980199	0.996925	-0.0055275	67.9371	60.2482	0.313684	0.17301	41.6185	38.1337	0.515445	0.125841
Higher RPS in Berkshire	13	207348449	ENSSSCG00000028768	KRTAP9-1	2.09943	0.602759	0.0221274	1.49667	Inactive	0	0	-	207745000	207750000	Less activity	21.6981	5.36216	0.201501	16.3359	0.429045	0.580353	0.990052	0.988974	0.9935	0.993607	0.994336	0.997636	0.00191835	67.9371	60.2482	0.313684	0.17301	32.1366	30.1429	0.494781	0.0921032
Higher RPS in Berkshire	6	14985192	ENSSSCG00000050689	Unknown	7.27567	6.10738	0.025827	1.16829	Active	1336.49	1345.67	0.498288	14885000	14890000	Less activity	26.8221	11.7925	0.0820943	15.0296	0.187817	0.202076	0.993852	0.993564	1	0.996551	0.996434	1	0.0279974	29.0732	30.3801	0.47828	-0.0632204	13.6482	19.176	0.0193793	-0.487565
Higher RPS in Berkshire	6	14985192	ENSSSCG00000050689	Unknown	7.27567	6.10738	0.025827	1.16829	Active	1336.49	1345.67	0.498288	14890000	14895000	Less activity	20.9836	16.1071	0.32634	4.87649	0.380006	0.647397	0.993852	0.993564	1	0.986112	0.986207	0.9999	0.0300806	29.0732	30.3801	0.47828	-0.0632204	24.1794	21.0598	0.136978	0.198407
Higher RPS in Berkshire	6	14985192	ENSSSCG00000050689	Unknown	7.27567	6.10738	0.025827	1.16829	Active	1336.49	1345.67	0.498288	14895000	14900000	Less activity	23.9992	13.0568	0.142776	10.9424	0.382619	0.330569	0.993852	0.993564	1	0.99705	0.9977	1	0.03185	29.0732	30.3801	0.47828	-0.0632204	19.7499	19.7995	0.967396	-0.00359681
Higher RPS in Berkshire	6	14985192	ENSSSCG00000050689	Unknown	7.27567	6.10738	0.025827	1.16829	Active	1336.49	1345.67	0.498288	14900000	14905000	Moderate activity	21.1773	10.8198	0.20866	10.3575	0.531275	0.305146	0.993852	0.993564	1	0.993164	0.995778	0.999867	0.0339313	29.0732	30.3801	0.47828	-0.0632204	29.2292	34.1562	0.312305	-0.224028
Higher RPS in Berkshire	6	14985192	ENSSSCG00000050689	Unknown	7.27567	6.10738	0.025827	1.16829	Active	1336.49	1345.67	0.498288	14945000	14950000	Less activity	67.1809	58.0847	0.0212102	9.09618	0.483101	0.438671	0.993852	0.993564	1	0.98737	0.989414	0.9999	0.0620214	29.0732	30.3801	0.47828	-0.0632204	168.612	209.602	0.103004	-0.313775
Higher RPS in Berkshire	6	19046795	ENSSSCG00000021519	CPNE2	13.7312	12.9357	0.0212509	0.795564	Active	2.06615	2.62946	0.440017	19105000	19110000	Less activity	31.0098	30.0193	0.853124	0.990498	0.585531	0.70653	0.9965	0.997201	0.9984	0.995403	0.994467	0.999867	0.00263636	107.344	103.926	0.555652	0.0466485	11.581	13.0154	0.578037	-0.167096
Higher RPS in Berkshire	6	19046795	ENSSSCG00000021519	CPNE2	13.7312	12.9357	0.0212509	0.795564	Active	2.06615	2.62946	0.440017	19115000	19120000	Less activity	26.0675	23.7668	0.807787	2.30065	0.491757	0.665231	0.9965	0.997201	0.9984	0.997451	0.998501	0.9986	0.00233077	107.344	103.926	0.555652	0.0466485	6.88063	5.42715	0.200698	0.336821
Higher RPS in Berkshire	6	19046795	ENSSSCG00000021519	CPNE2	13.7312	12.9357	0.0212509	0.795564	Active	2.06615	2.62946	0.440017	19120000	19125000	Less activity	32.5449	32.1375	0.973815	0.407339	0.71787	0.426486	0.9965	0.997201	0.9984	0.997949	0.999266	0.998333	0.00219286	107.344	103.926	0.555652	0.0466485	12.6646	8.44548	0.108021	0.578916
Higher RPS in Berkshire	6	19046795	ENSSSCG00000021519	CPNE2	13.7312	12.9357	0.0212509	0.795564	Active	2.06615	2.62946	0.440017	19125000	19130000	Less activity	40.4547	45.9755	0.560735	-5.52082	0.655844	0.554593	0.9965	0.997201	0.9984	0.99845	0.999467	0.998333	0.00203667	107.344	103.926	0.555652	0.0466485	9.24973	7.95817	0.657501	0.214473
Higher RPS in Berkshire	6	19046795	ENSSSCG00000021519	CPNE2	13.7312	12.9357	0.0212509	0.795564	Active	2.06615	2.62946	0.440017	19130000	19135000	Less activity	55.5434	51.729	0.713316	3.81439	0.78637	0.584504	0.9965	0.997201	0.9984	0.997183	0.999332	0.997071	0.00190938	107.344	103.926	0.555652	0.0466485	8.5506	9.71196	0.488551	-0.181742
Higher RPS in Berkshire	6	19046795	ENSSSCG00000021519	CPNE2	13.7312	12.9357	0.0212509	0.795564	Active	2.06615	2.62946	0.440017	19135000	19140000	Less activity	52.4285	44.6286	0.122743	7.79992	0.963837	0.57454	0.9965	0.997201	0.9984	0.982889	0.989872	0.9986	0.00171765	107.344	103.926	0.555652	0.0466485	8.34217	9.53434	0.724841	-0.190571
Higher RPS in Berkshire	6	19046795	ENSSSCG00000021519	CPNE2	13.7312	12.9357	0.0212509	0.795564	Active	2.06615	2.62946	0.440017	19140000	19145000	Moderate activity	39.7088	25.9146	0.106035	13.7942	0.788507	0.911474	0.9965	0.997201	0.9984	0.994177	0.999367	0.993401	0.000963889	107.344	103.926	0.555652	0.0466485	21.7071	20.726	0.410258	0.0664183
Higher RPS in Berkshire	6	19046795	ENSSSCG00000021519	CPNE2	13.7312	12.9357	0.0212509	0.795564	Active	2.06615	2.62946	0.440017	19145000	19150000	Less activity	30.7845	17.4977	0.134233	13.2869	0.855304	0.718247	0.9965	0.997201	0.9984	0.993213	0.995407	0.998502	0.00103158	107.344	103.926	0.555652	0.0466485	6.26897	7.56275	0.234914	-0.266802
Higher RPS in Berkshire	6	19046795	ENSSSCG00000021519	CPNE2	13.7312	12.9357	0.0212509	0.795564	Active	2.06615	2.62946	0.440017	19155000	19160000	Less activity	21.9474	13.1196	0.0569474	8.82778	0.757439	0.734691	0.9965	0.997201	0.9984	0.995951	0.998033	0.996535	0.00109048	107.344	103.926	0.555652	0.0466485	42.5975	40.549	0.77479	0.0709328
Higher RPS in Berkshire	6	50158685	ENSSSCG00000024568	PSG9	4.5546	3.30987	0.00621804	1.24473	Inactive	-	-	-	50045000	50050000	Less activity	31.4564	32.8682	0.843578	-1.41181	0.280065	0.480954	0.997976	0.998334	0.999334	0.99905	0.9996	0.9994	0.0003	15.5704	11.5203	0.514222	0.431389	5.03681	5.20597	0.888661	-0.0467452
Higher RPS in Berkshire	6	50158685	ENSSSCG00000024568	PSG9	4.5546	3.30987	0.00621804	1.24473	Inactive	-	-	-	50050000	50055000	Less activity	23.0896	27.573	0.601131	-4.48343	0.184568	0.637424	0.997976	0.998334	0.999334	0.991516	0.986056	0.998503	7.5e-05	15.5704	11.5203	0.514222	0.431389	5.66183	4.18098	0.13904	0.428586
Higher RPS in Berkshire	6	50158685	ENSSSCG00000024568	PSG9	4.5546	3.30987	0.00621804	1.24473	Inactive	-	-	-	50110000	50115000	Less activity	59.1953	9.11676	0.0456913	50.0785	0.325169	0.354681	0.997976	0.998334	0.999334	1	1	1	0	15.5704	11.5203	0.514222	0.431389	0	0	NA	-
Higher RPS in Berkshire	6	54889954	ENSSSCG00000003194	AKT1S1	4.88064	4.37733	0.00850516	0.503313	Active	10.7907	9.50562	0.531658	54935000	54940000	Less activity	50.0817	38.851	0.220142	11.2306	0.26877	0.156398	0.999351	0.9997	1	0.996402	0.9982	0.999267	-0.000133333	125.499	138.289	0.230088	-0.139913	100.892	97.4728	0.231065	0.0496918
Higher RPS in Berkshire	6	54889954	ENSSSCG00000003194	AKT1S1	4.88064	4.37733	0.00850516	0.503313	Active	10.7907	9.50562	0.531658	54940000	54945000	Less activity	48.0462	34.3662	0.062254	13.68	0.0557687	0.35231	0.999351	0.9997	1	0.991702	0.999596	0.994802	0.00013	125.499	138.289	0.230088	-0.139913	48.8265	44.3259	0.402542	0.139215
Higher RPS in Berkshire	6	54889954	ENSSSCG00000003194	AKT1S1	4.88064	4.37733	0.00850516	0.503313	Active	10.7907	9.50562	0.531658	54950000	54955000	Less activity	31.3272	16.6817	0.0697337	14.6455	0.0387215	0.671865	0.999351	0.9997	1	0.9988	0.9995	0.9997	0.000733333	125.499	138.289	0.230088	-0.139913	12.6468	11.8215	0.575188	0.0965692
Higher RPS in Berkshire	6	55125275	ENSSSCG00000030492	Unknown	2.79764	2.29573	0.0335315	0.501906	Inactive	0	0	-	55070000	55075000	Less activity	24.3598	14.9057	0.0470478	9.45413	0.33116	0.123424	0.997651	0.997769	0.997635	0.998026	0.999001	0.9995	5.5e-05	7.05097	7.90225	0.476971	-0.162266	9.82732	10.0169	0.796709	-0.0272982
Higher RPS in Berkshire	6	55125275	ENSSSCG00000030492	Unknown	2.79764	2.29573	0.0335315	0.501906	Inactive	0	0	-	55075000	55080000	Less activity	32.9059	22.5303	0.0463512	10.3756	0.0219966	0.56995	0.997651	0.997769	0.997635	0.996366	0.999501	0.997777	0.0001	7.05097	7.90225	0.476971	-0.162266	11.236	14.0434	0.250023	-0.31921
Higher RPS in Berkshire	6	59570490	ENSSSCG00000035344	UBE2S	7.53233	6.7518	0.00121282	0.780522	Active	82.6909	134.186	0.38128	59470000	59475000	Less activity	30.4158	17.7299	0.0506214	12.6859	0.283627	0.457505	0.9993	0.999533	0.999733	0.998049	0.998467	0.9998	0.000476316	82.3513	84.8131	0.712876	-0.042444	13.0148	11.9435	0.404778	0.122937
Higher RPS in Berkshire	6	59570490	ENSSSCG00000035344	UBE2S	7.53233	6.7518	0.00121282	0.780522	Active	82.6909	134.186	0.38128	59475000	59480000	Less activity	35.1806	27.2109	0.0504633	7.9698	0.459494	0.142061	0.9993	0.999533	0.999733	0.9969	0.9988	0.997067	0.000580556	82.3513	84.8131	0.712876	-0.042444	11.9953	16.3428	0.398852	-0.443015
Higher RPS in Berkshire	6	59570490	ENSSSCG00000035344	UBE2S	7.53233	6.7518	0.00121282	0.780522	Active	82.6909	134.186	0.38128	59480000	59485000	Less activity	41.5963	38.4393	0.445182	3.15701	0.593423	0.16404	0.9993	0.999533	0.999733	0.9981	0.9988	0.999867	0.000623529	82.3513	84.8131	0.712876	-0.042444	8.29023	10.385	0.471564	-0.321547
Higher RPS in Berkshire	6	59570490	ENSSSCG00000035344	UBE2S	7.53233	6.7518	0.00121282	0.780522	Active	82.6909	134.186	0.38128	59485000	59490000	Less activity	29.526	15.9481	0.046968	13.5778	0.51908	0.523169	0.9993	0.999533	0.999733	0.9983	0.9992	0.999867	0.0006375	82.3513	84.8131	0.712876	-0.042444	10.8961	12.1172	0.478556	-0.151919
Higher RPS in Berkshire	6	59570490	ENSSSCG00000035344	UBE2S	7.53233	6.7518	0.00121282	0.780522	Active	82.6909	134.186	0.38128	59490000	59495000	Moderate activity	26.8869	17.9789	0.4093	8.90791	0.579598	0.172374	0.9993	0.999533	0.999733	0.99945	0.999533	0.999767	0.00068	82.3513	84.8131	0.712876	-0.042444	9.89229	8.53588	0.356443	0.210473
Higher RPS in Berkshire	6	61826661	ENSSSCG00000033122	Unknown	3.557	1.88489	0.0208849	1.67211	Active	0.138729	0.138729	-	61585000	61590000	Less activity	25.1825	9.20087	0.200857	15.9816	0.212752	0.18522	0.9966	0.9998	0.9938	1	1	1	-0.000704255	4.90055	6.26242	0.392446	-0.347487	0.062731	0	0.391002	-
Higher RPS in Berkshire	6	61826661	ENSSSCG00000033122	Unknown	3.557	1.88489	0.0208849	1.67211	Active	0.138729	0.138729	-	61600000	61605000	Less activity	16.6837	16.2569	0.988337	0.426778	0.393601	0.34408	0.9966	0.9998	0.9938	0.993876	1	0.991835	-0.000893182	4.90055	6.26242	0.392446	-0.347487	0.118479	0.130177	0.957697	-
Higher RPS in Berkshire	6	61826661	ENSSSCG00000033122	Unknown	3.557	1.88489	0.0208849	1.67211	Active	0.138729	0.138729	-	61630000	61635000	Less activity	39.1257	1.35588	0.250696	37.7698	0.113227	0.293563	0.9966	0.9998	0.9938	1	1	1	-0.00102368	4.90055	6.26242	0.392446	-0.347487	0	0.0433923	0.391002	-
Higher RPS in Berkshire	6	61826661	ENSSSCG00000033122	Unknown	3.557	1.88489	0.0208849	1.67211	Active	0.138729	0.138729	-	61785000	61790000	Less activity	34.0518	22.7407	0.73062	11.3111	0.416081	0.215452	0.9966	0.9998	0.9938	1	1	1	0.000407143	4.90055	6.26242	0.392446	-0.347487	0	0	NA	-
Higher RPS in Berkshire	6	67455277	ENSSSCG00000036876	THAP3	3.90024	2.99112	0.047912	0.909121	Active	6.53602	8.17979	0.44415	67340000	67345000	Less activity	18.1311	10.5435	0.342498	7.58761	0.202826	0.430755	0.990401	0.994305	0.99347	0.997301	0.998201	0.998701	0.00085	105.288	94.7055	0.534212	0.152674	25.2095	26.001	0.664467	-0.0444261
Higher RPS in Berkshire	6	67455277	ENSSSCG00000036876	THAP3	3.90024	2.99112	0.047912	0.909121	Active	6.53602	8.17979	0.44415	67390000	67395000	Less activity	24.3868	9.44996	0.0509674	14.9368	0.318574	0.460982	0.990401	0.994305	0.99347	0.991754	0.994668	0.99637	0.00161667	105.288	94.7055	0.534212	0.152674	29.1804	27.6801	0.388281	0.0758861
Higher RPS in Berkshire	6	67455277	ENSSSCG00000036876	THAP3	3.90024	2.99112	0.047912	0.909121	Active	6.53602	8.17979	0.44415	67415000	67420000	Less activity	22.2627	17.3945	0.748899	4.86825	0.432504	0.393846	0.990401	0.994305	0.99347	0.99357	0.995148	0.995282	-0.0005	105.288	94.7055	0.534212	0.152674	24.932	25.2584	0.96068	-0.0186873
Higher RPS in Berkshire	6	69720806	ENSSSCG00000035940	SPSB1	35.9407	34.0184	0.0265707	1.92227	Active	1.84632	1.25539	0.595259	69770000	69775000	High activity	29.8629	8.09094	0.230058	21.772	0.795592	0.815104	0.997951	0.998234	0.998501	0.990054	0.989132	0.990618	0.00247778	182.596	170.398	0.145027	0.0996951	48.4489	40.8171	0.343597	0.246734
Higher RPS in Berkshire	6	69720806	ENSSSCG00000035940	SPSB1	35.9407	34.0184	0.0265707	1.92227	Active	1.84632	1.25539	0.595259	69790000	69795000	High activity	30.1128	23.0147	0.0315529	7.09808	0.967873	0.908603	0.997951	0.998234	0.998501	0.99845	0.998034	0.999033	0.00205385	182.596	170.398	0.145027	0.0996951	22.7927	25.9421	0.294278	-0.18596
Higher RPS in Berkshire	6	69720806	ENSSSCG00000035940	SPSB1	35.9407	34.0184	0.0265707	1.92227	Active	1.84632	1.25539	0.595259	69810000	69815000	High activity	17.9554	23.6233	0.441748	-5.66785	0.902356	0.87436	0.997951	0.998234	0.998501	0.996011	0.993887	0.998567	0.00247059	182.596	170.398	0.145027	0.0996951	53.4763	50.9055	0.577019	0.0709422
Higher RPS in Berkshire	6	69720806	ENSSSCG00000035940	SPSB1	35.9407	34.0184	0.0265707	1.92227	Active	1.84632	1.25539	0.595259	69820000	69825000	High activity	20.7762	24.9885	0.30196	-4.21236	0.983636	0.746307	0.997951	0.998234	0.998501	0.9982	0.9981	0.9989	0.00218947	182.596	170.398	0.145027	0.0996951	10.5063	10.4971	0.98672	0.00125161
Higher RPS in Berkshire	6	69720806	ENSSSCG00000035940	SPSB1	35.9407	34.0184	0.0265707	1.92227	Active	1.84632	1.25539	0.595259	69825000	69830000	High activity	18.7843	29.0846	0.13835	-10.3004	0.961035	0.68176	0.997951	0.998234	0.998501	0.996601	0.997167	0.997101	0.0020675	182.596	170.398	0.145027	0.0996951	30.6669	31.8053	0.723613	-0.0524124
Higher RPS in Berkshire	6	69720806	ENSSSCG00000035940	SPSB1	35.9407	34.0184	0.0265707	1.92227	Active	1.84632	1.25539	0.595259	69830000	69835000	Less activity	25.2462	29.5424	0.66971	-4.29623	0.944213	0.972648	0.997951	0.998234	0.998501	0.994298	0.992793	0.995035	0.00197619	182.596	170.398	0.145027	0.0996951	21.6568	22.3044	0.776556	-0.0423138
Higher RPS in Berkshire	6	69720806	ENSSSCG00000035940	SPSB1	35.9407	34.0184	0.0265707	1.92227	Active	1.84632	1.25539	0.595259	69835000	69840000	Less activity	30.8284	35.0297	0.503353	-4.20124	0.951918	0.936111	0.997951	0.998234	0.998501	0.997275	0.997901	0.998167	0.00195	182.596	170.398	0.145027	0.0996951	39.1132	35.4547	0.152679	0.141299
Higher RPS in Berkshire	6	69720806	ENSSSCG00000035940	SPSB1	35.9407	34.0184	0.0265707	1.92227	Active	1.84632	1.25539	0.595259	69840000	69845000	Less activity	36.7517	43.18	0.454667	-6.42828	0.908998	0.815387	0.997951	0.998234	0.998501	0.993356	0.993358	0.992398	0.00185652	182.596	170.398	0.145027	0.0996951	29.2103	29.3915	0.94914	-0.00889392
Higher RPS in Berkshire	6	69720806	ENSSSCG00000035940	SPSB1	35.9407	34.0184	0.0265707	1.92227	Active	1.84632	1.25539	0.595259	69845000	69850000	Less activity	43.6095	39.6845	0.716179	3.92505	0.822523	0.925772	0.997951	0.998234	0.998501	0.991525	0.987597	0.99419	0.00176042	182.596	170.398	0.145027	0.0996951	28.7635	27.055	0.80946	0.0880271
Higher RPS in Berkshire	6	69720806	ENSSSCG00000035940	SPSB1	35.9407	34.0184	0.0265707	1.92227	Active	1.84632	1.25539	0.595259	69850000	69855000	Less activity	52.2623	45.5681	0.11788	6.69426	0.966628	0.917009	0.997951	0.998234	0.998501	0.996004	0.997835	0.996138	0.001538	182.596	170.398	0.145027	0.0996951	18.4087	17.7183	0.893885	0.0548489
Higher RPS in Berkshire	6	69720806	ENSSSCG00000035940	SPSB1	35.9407	34.0184	0.0265707	1.92227	Active	1.84632	1.25539	0.595259	69855000	69860000	Less activity	67.427	47.7273	0.314094	19.6997	0.961127	0.783478	0.997951	0.998234	0.998501	0.996776	0.997467	0.999033	0.00150769	182.596	170.398	0.145027	0.0996951	18.7875	16.2025	0.15022	0.212343
Higher RPS in Berkshire	6	69720806	ENSSSCG00000035940	SPSB1	35.9407	34.0184	0.0265707	1.92227	Active	1.84632	1.25539	0.595259	69860000	69865000	Less activity	83.9378	70.3182	0.467787	13.6196	0.977949	0.988483	0.997951	0.998234	0.998501	0.975445	0.996986	0.984205	0.0014463	182.596	170.398	0.145027	0.0996951	21.8733	21.7371	0.971435	0.00896993
Higher RPS in Berkshire	6	69720806	ENSSSCG00000035940	SPSB1	35.9407	34.0184	0.0265707	1.92227	Active	1.84632	1.25539	0.595259	69865000	69870000	Less activity	84.0096	52.9815	0.0637019	31.0282	0.953934	0.984373	0.997951	0.998234	0.998501	0.994672	0.995329	0.996699	0.000641071	182.596	170.398	0.145027	0.0996951	28.7333	29.37	0.80748	-0.0315124
Higher RPS in Berkshire	6	69720806	ENSSSCG00000035940	SPSB1	35.9407	34.0184	0.0265707	1.92227	Active	1.84632	1.25539	0.595259	69870000	69875000	Moderate activity	60.3812	49.0419	0.362746	11.3393	0.936711	0.849356	0.997951	0.998234	0.998501	0.994382	0.994507	0.997302	0.000644828	182.596	170.398	0.145027	0.0996951	22.0921	29.6213	0.0212603	-0.421453
Higher RPS in Berkshire	6	69720806	ENSSSCG00000035940	SPSB1	35.9407	34.0184	0.0265707	1.92227	Active	1.84632	1.25539	0.595259	69875000	69880000	Moderate activity	54.0473	45.5394	0.205735	8.50792	0.992645	0.927486	0.997951	0.998234	0.998501	0.996521	0.996256	0.996667	0.000573333	182.596	170.398	0.145027	0.0996951	32.253	29.3644	0.228308	0.134923
Higher RPS in Berkshire	6	69720806	ENSSSCG00000035940	SPSB1	35.9407	34.0184	0.0265707	1.92227	Active	1.84632	1.25539	0.595259	69880000	69885000	Moderate activity	48.4393	38.7457	0.145656	9.69364	0.961436	0.739261	0.997951	0.998234	0.998501	0.995456	0.9982	0.995074	0.000570968	182.596	170.398	0.145027	0.0996951	22.6811	21.7889	0.389917	0.0576379
Higher RPS in Berkshire	6	69720806	ENSSSCG00000035940	SPSB1	35.9407	34.0184	0.0265707	1.92227	Active	1.84632	1.25539	0.595259	69885000	69890000	Less activity	42.7798	50.1362	0.41741	-7.3564	0.980521	0.966439	0.997951	0.998234	0.998501	0.990548	0.99622	0.995134	0.000579688	182.596	170.398	0.145027	0.0996951	34.3634	35.9275	0.59908	-0.0640345
Higher RPS in Berkshire	6	69720806	ENSSSCG00000035940	SPSB1	35.9407	34.0184	0.0265707	1.92227	Active	1.84632	1.25539	0.595259	69890000	69895000	Less activity	50.5033	52.5286	0.582814	-2.02532	0.988262	0.987405	0.997951	0.998234	0.998501	0.988006	0.991754	0.99621	0.000657576	182.596	170.398	0.145027	0.0996951	31.673	32.8015	0.778044	-0.0503487
Higher RPS in Berkshire	6	69720806	ENSSSCG00000035940	SPSB1	35.9407	34.0184	0.0265707	1.92227	Active	1.84632	1.25539	0.595259	69895000	69900000	Less activity	46.1375	58.8273	0.453896	-12.6898	0.9871	0.930204	0.997951	0.998234	0.998501	0.993339	0.99073	0.997035	0.000782353	182.596	170.398	0.145027	0.0996951	18.2251	17.1584	0.358619	0.0865242
Higher RPS in Berkshire	6	69720806	ENSSSCG00000035940	SPSB1	35.9407	34.0184	0.0265707	1.92227	Active	1.84632	1.25539	0.595259	69900000	69905000	Less activity	32.2806	29.9625	0.42768	2.31806	0.947863	0.925467	0.997951	0.998234	0.998501	0.995301	0.993069	0.996267	0.000725714	182.596	170.398	0.145027	0.0996951	29.5526	31.0381	0.60128	-0.0705193
Higher RPS in Berkshire	6	69720806	ENSSSCG00000035940	SPSB1	35.9407	34.0184	0.0265707	1.92227	Active	1.84632	1.25539	0.595259	69905000	69910000	Less activity	30.776	18.2147	0.212031	12.5613	0.981998	0.974977	0.997951	0.998234	0.998501	0.984513	0.984189	0.986227	0.000722222	182.596	170.398	0.145027	0.0996951	78.3029	85.4266	0.513318	-0.125466
Higher RPS in Berkshire	6	69720806	ENSSSCG00000035940	SPSB1	35.9407	34.0184	0.0265707	1.92227	Active	1.84632	1.25539	0.595259	69910000	69915000	Less activity	24.0426	14.0367	0.41362	10.0059	0.936641	0.5739	0.997951	0.998234	0.998501	0.719346	0.630235	0.721159	0.000597297	182.596	170.398	0.145027	0.0996951	146.734	143.517	0.138329	0.0319604
Higher RPS in Berkshire	6	69720806	ENSSSCG00000035940	SPSB1	35.9407	34.0184	0.0265707	1.92227	Active	1.84632	1.25539	0.595259	69935000	69940000	Less activity	21.6099	6.30881	0.118329	15.3011	0.842002	0.929357	0.997951	0.998234	0.998501	0.991905	0.993236	0.99557	-0.00684524	182.596	170.398	0.145027	0.0996951	64.9616	69.3661	0.101984	-0.094503
Higher RPS in Berkshire	6	82672445	ENSSSCG00000037664	Unknown	9.06402	7.9901	0.0366262	1.07392	Inactive	0.0462949	0.0462949	-	82485000	82490000	Less activity	28.9758	18.823	0.273455	10.1528	0.273586	0.451993	0.993394	0.990807	0.998233	0.969334	0.961999	0.997272	-0.000197222	14.9558	18.8856	0.293825	-0.334592	31.7699	39.7191	0.0152286	-0.321269
Higher RPS in Berkshire	6	82672445	ENSSSCG00000037664	Unknown	9.06402	7.9901	0.0366262	1.07392	Inactive	0.0462949	0.0462949	-	82490000	82495000	Less activity	21.4986	22.4608	0.916191	-0.962182	0.417805	0.294464	0.993394	0.990807	0.998233	0.985247	0.981532	0.997435	-0.000162857	14.9558	18.8856	0.293825	-0.334592	45.6391	56.5787	0.0854166	-0.309379
Higher RPS in Berkshire	6	82672445	ENSSSCG00000037664	Unknown	9.06402	7.9901	0.0366262	1.07392	Inactive	0.0462949	0.0462949	-	82550000	82555000	Less activity	16.8627	13.4586	0.597965	3.40407	0.200028	0.25708	0.993394	0.990807	0.998233	0.997649	0.997799	0.9987	-0.00056087	14.9558	18.8856	0.293825	-0.334592	14.6128	13.3301	0.473239	0.1316
Higher RPS in Berkshire	6	82672445	ENSSSCG00000037664	Unknown	9.06402	7.9901	0.0366262	1.07392	Inactive	0.0462949	0.0462949	-	82555000	82560000	Less activity	23.71	17.5403	0.333574	6.1697	0.313009	0.244463	0.993394	0.990807	0.998233	0.997701	0.997369	0.998467	-0.000570455	14.9558	18.8856	0.293825	-0.334592	18.7492	17.6819	0.646096	0.0840927
Higher RPS in Berkshire	6	82672445	ENSSSCG00000037664	Unknown	9.06402	7.9901	0.0366262	1.07392	Inactive	0.0462949	0.0462949	-	82560000	82565000	Moderate activity	17.0521	21.6131	0.565995	-4.56096	0.293555	0.0476037	0.993394	0.990807	0.998233	0.996728	0.995569	0.997736	-0.000621429	14.9558	18.8856	0.293825	-0.334592	28.3403	29.3853	0.393177	-0.0520629
Higher RPS in Berkshire	6	82672445	ENSSSCG00000037664	Unknown	9.06402	7.9901	0.0366262	1.07392	Inactive	0.0462949	0.0462949	-	82565000	82570000	Moderate activity	24.9471	15.9026	0.0470222	9.0445	0.202257	0.0356758	0.993394	0.990807	0.998233	0.997307	0.995349	0.999467	-0.0006	14.9558	18.8856	0.293825	-0.334592	32.2601	35.1655	0.460427	-0.12404
Higher RPS in Berkshire	6	82672445	ENSSSCG00000037664	Unknown	9.06402	7.9901	0.0366262	1.07392	Inactive	0.0462949	0.0462949	-	82570000	82575000	Moderate activity	18.8615	4.94114	0.109525	13.9204	0.205271	0.292922	0.993394	0.990807	0.998233	0.995398	0.995128	0.998033	-0.000689474	14.9558	18.8856	0.293825	-0.334592	25.2978	27.0301	0.654958	-0.0951923
Higher RPS in Berkshire	6	82843407	ENSSSCG00000037481	SYF2	2.56906	2.06342	0.0394836	0.505636	Active	75.1237	71.6876	0.511702	83255000	83260000	Less activity	23.5167	12.5984	0.296679	10.9182	0.0107274	0.110161	0.994654	0.995503	0.995671	0.995302	0.996301	0.9987	0.00172927	288.151	288.655	0.962136	-0.00252157	73.4434	74.5108	0.912663	-0.0207896
Higher RPS in Berkshire	6	82843407	ENSSSCG00000037481	SYF2	2.56906	2.06342	0.0394836	0.505636	Active	75.1237	71.6876	0.511702	83260000	83265000	Less activity	17.5771	11.8421	0.419003	5.73504	0.165402	0.12685	0.994654	0.995503	0.995671	0.990927	0.993267	0.9991	0.00170482	288.151	288.655	0.962136	-0.00252157	67.9632	67.2775	0.828368	0.0146075
Higher RPS in Berkshire	6	92298928	ENSSSCG00000003637	MAP7D1	3.82487	3.3297	0.0183557	0.495168	Active	14.7869	13.0184	0.531803	92320000	92325000	Less activity	94.716	56.0017	0.0421848	38.7143	0.4247	0.531771	0.996904	0.993909	0.9999	0.997451	0.997302	1	0.00015	58.5988	58.8933	0.391002	-0.00722011	31.5825	34.182	0.116005	-0.113767
Higher RPS in Berkshire	6	92298928	ENSSSCG00000003637	MAP7D1	3.82487	3.3297	0.0183557	0.495168	Active	14.7869	13.0184	0.531803	92325000	92330000	Less activity	72.9362	38.7099	0.0707024	34.2263	0.608936	0.330067	0.996904	0.993909	0.9999	0.989358	0.993069	1	0	58.5988	58.8933	0.391002	-0.00722011	81.0828	84.118	0.660439	-0.0529554
Higher RPS in Berkshire	6	103424779	ENSSSCG00000003691	MYL12A	1.36862	0.67056	0.00983351	0.698057	Active	280.819	261.688	0.517633	103495000	103500000	Less activity	23.3194	4.63657	0.00540127	18.6829	0.114058	0.049944	0.944386	0.999399	1	0.98466	0.986026	0.999867	-0.000114286	203.712	193.101	0.156375	0.0771327	23.2092	19.4346	0.285256	0.254872
Higher RPS in Berkshire	6	167358674	ENSSSCG00000034778	ARTN	17.0116	16.344	0.00730409	0.667552	Active	0.160897	0.160897	-	167490000	167495000	Less activity	22.7707	24.2218	0.714339	-1.45106	0.335783	0.561874	0.984218	0.985215	0.9999	0.985447	0.984532	0.9881	0.00195769	42.8537	44.095	0.658307	-0.0410991	19.4913	19.4134	0.881556	0.00574759
Higher RPS in Berkshire	6	167358674	ENSSSCG00000034778	ARTN	17.0116	16.344	0.00730409	0.667552	Active	0.160897	0.160897	-	167500000	167505000	Less activity	21.247	27.7417	0.175075	-6.49463	0.106427	0.209551	0.984218	0.985215	0.9999	0.990202	0.99317	0.996134	0.0020125	42.8537	44.095	0.658307	-0.0410991	28.5855	25.9289	0.371834	0.140205
Higher RPS in Berkshire	6	167358674	ENSSSCG00000034778	ARTN	17.0116	16.344	0.00730409	0.667552	Active	0.160897	0.160897	-	167505000	167510000	Less activity	29.0698	27.5457	0.701801	1.52408	0.424091	0.217761	0.984218	0.985215	0.9999	0.914007	0.896724	0.954583	0.00194655	42.8537	44.095	0.658307	-0.0410991	26.5024	29.4365	0.299925	-0.15094
Higher RPS in Berkshire	6	167358674	ENSSSCG00000034778	ARTN	17.0116	16.344	0.00730409	0.667552	Active	0.160897	0.160897	-	167510000	167515000	Less activity	44.1562	32.0604	0.0606708	12.0958	0.804653	0.600503	0.984218	0.985215	0.9999	0.934655	0.992354	0.920842	0.00091	42.8537	44.095	0.658307	-0.0410991	31.1284	32.807	0.707137	-0.0755348
Higher RPS in Berkshire	6	167358674	ENSSSCG00000034778	ARTN	17.0116	16.344	0.00730409	0.667552	Active	0.160897	0.160897	-	167515000	167520000	Less activity	64.0456	71.4365	0.529882	-7.39089	0.389119	0.912865	0.984218	0.985215	0.9999	0.904443	0.880895	0.993344	2.90323e-05	42.8537	44.095	0.658307	-0.0410991	33.2962	30.1045	0.253133	0.14492
Higher RPS in Berkshire	6	167358674	ENSSSCG00000034778	ARTN	17.0116	16.344	0.00730409	0.667552	Active	0.160897	0.160897	-	167520000	167525000	Less activity	64.5793	64.0938	0.953894	0.485443	0.504901	0.230377	0.984218	0.985215	0.9999	0.991565	0.992413	0.996239	-0.00237969	42.8537	44.095	0.658307	-0.0410991	22.771	23.5151	0.636878	-0.0461886
Higher RPS in Berkshire	6	167358674	ENSSSCG00000034778	ARTN	17.0116	16.344	0.00730409	0.667552	Active	0.160897	0.160897	-	167525000	167530000	Less activity	58.4066	38.8533	0.241154	19.5533	0.74302	0.145047	0.984218	0.985215	0.9999	0.987645	0.991028	0.998468	-0.00231667	42.8537	44.095	0.658307	-0.0410991	15.5955	21.5041	0.0388809	-0.460952
Higher RPS in Berkshire	6	167358674	ENSSSCG00000034778	ARTN	17.0116	16.344	0.00730409	0.667552	Active	0.160897	0.160897	-	167530000	167535000	Less activity	41.9577	43.1332	0.929571	-1.17548	0.650274	0.0690815	0.984218	0.985215	0.9999	0.997955	0.998364	0.998875	-0.00230588	42.8537	44.095	0.658307	-0.0410991	10.8483	10.46	0.771777	0.052097
Higher RPS in Berkshire	6	167358674	ENSSSCG00000034778	ARTN	17.0116	16.344	0.00730409	0.667552	Active	0.160897	0.160897	-	167535000	167540000	Less activity	35.864	23.3553	0.297274	12.5087	0.60703	0.501508	0.984218	0.985215	0.9999	0.996622	0.996342	0.999396	-0.00224429	42.8537	44.095	0.658307	-0.0410991	5.55273	5.73599	0.859505	-0.046029
Higher RPS in Berkshire	6	167358674	ENSSSCG00000034778	ARTN	17.0116	16.344	0.00730409	0.667552	Active	0.160897	0.160897	-	167540000	167545000	Moderate activity	26.7732	19.1493	0.355771	7.62383	0.421217	0.393487	0.984218	0.985215	0.9999	0.995632	0.997992	0.999398	-0.00217361	42.8537	44.095	0.658307	-0.0410991	17.9167	14.3564	0.217429	0.317625
Higher RPS in Berkshire	6	167358674	ENSSSCG00000034778	ARTN	17.0116	16.344	0.00730409	0.667552	Active	0.160897	0.160897	-	167605000	167610000	Less activity	19.8125	14.0481	0.184678	5.76448	0.594626	0.411475	0.984218	0.985215	0.9999	0.983968	0.998764	1	0.00187245	42.8537	44.095	0.658307	-0.0410991	45.1722	43.5306	0.398218	0.0532843
Higher RPS in Berkshire	6	167881352	ENSSSCG00000035238	ELOVL1	14.7644	14.0616	0.0393967	0.702758	Active	28.8062	24.3879	0.54153	167950000	167955000	Less activity	26.8014	11.6259	0.033445	15.1754	0.572862	0.604111	0.987078	0.994761	0.999733	0.979959	0.980946	0.9987	-0.0276	395.739	398.916	0.876732	-0.0115319	54.456	58.9184	0.355375	-0.113427
Higher RPS in Berkshire	6	167881352	ENSSSCG00000035238	ELOVL1	14.7644	14.0616	0.0393967	0.702758	Active	28.8062	24.3879	0.54153	167955000	167960000	Less activity	21.5094	23.3506	0.816127	-1.84119	0.796038	0.120132	0.987078	0.994761	0.999733	0.993551	0.992634	1	-0.0258321	395.739	398.916	0.876732	-0.0115319	62.52	56.9524	0.406624	0.134336
Higher RPS in Berkshire	6	167881352	ENSSSCG00000035238	ELOVL1	14.7644	14.0616	0.0393967	0.702758	Active	28.8062	24.3879	0.54153	167965000	167970000	Less activity	29.882	18.2213	0.146	11.6607	0.821925	0.248703	0.987078	0.994761	0.999733	0.992413	0.99335	0.9996	-0.0226375	395.739	398.916	0.876732	-0.0115319	44.4952	49.0136	0.0195593	-0.139234
Higher RPS in Berkshire	6	167881352	ENSSSCG00000035238	ELOVL1	14.7644	14.0616	0.0393967	0.702758	Active	28.8062	24.3879	0.54153	167970000	167975000	Less activity	28.137	19.9964	0.267032	8.14061	0.529257	0.584222	0.987078	0.994761	0.999733	0.994509	0.994909	0.997635	-0.0213853	395.739	398.916	0.876732	-0.0115319	34.7575	38.6077	0.135312	-0.15115
Higher RPS in Berkshire	6	167881352	ENSSSCG00000035238	ELOVL1	14.7644	14.0616	0.0393967	0.702758	Active	28.8062	24.3879	0.54153	167980000	167985000	Less activity	28.1513	24.4942	0.578363	3.65713	0.687386	0.537857	0.987078	0.994761	0.999733	0.978876	0.986932	0.993739	-0.0191711	395.739	398.916	0.876732	-0.0115319	100.991	100.613	0.952323	0.00539857
Higher RPS in Berkshire	6	167881352	ENSSSCG00000035238	ELOVL1	14.7644	14.0616	0.0393967	0.702758	Active	28.8062	24.3879	0.54153	167985000	167990000	Less activity	34.6731	28.0741	0.499185	6.59902	0.83072	0.321006	0.987078	0.994761	0.999733	0.983939	0.988052	0.987557	-0.0177975	395.739	398.916	0.876732	-0.0115319	71.6814	73.3676	0.697408	-0.0334976
Higher RPS in Berkshire	6	167881352	ENSSSCG00000035238	ELOVL1	14.7644	14.0616	0.0393967	0.702758	Active	28.8062	24.3879	0.54153	167990000	167995000	Less activity	28.4276	32.4474	0.538384	-4.01978	0.588772	0.48443	0.987078	0.994761	0.999733	0.981311	0.991401	0.984949	-0.0168643	395.739	398.916	0.876732	-0.0115319	73.1106	67.3776	0.358154	0.117643
Higher RPS in Berkshire	6	167881352	ENSSSCG00000035238	ELOVL1	14.7644	14.0616	0.0393967	0.702758	Active	28.8062	24.3879	0.54153	167995000	168000000	Less activity	61.6533	51.5911	0.258327	10.0622	0.97322	0.697012	0.987078	0.994761	0.999733	0.988308	0.986478	0.993203	-0.0161795	395.739	398.916	0.876732	-0.0115319	308.119	294.04	0.574674	0.0674504
Higher RPS in Berkshire	6	167881352	ENSSSCG00000035238	ELOVL1	14.7644	14.0616	0.0393967	0.702758	Active	28.8062	24.3879	0.54153	168000000	168005000	Less activity	31.176	30.0124	0.857502	1.1636	0.937531	0.75611	0.987078	0.994761	0.999733	0.991237	0.990551	0.997668	-0.0155152	395.739	398.916	0.876732	-0.0115319	51.2417	42.4344	0.507935	0.271499
Higher RPS in Berkshire	6	167881352	ENSSSCG00000035238	ELOVL1	14.7644	14.0616	0.0393967	0.702758	Active	28.8062	24.3879	0.54153	168005000	168010000	Less activity	31.4537	37.1129	0.782569	-5.6592	0.779507	0.886299	0.987078	0.994761	0.999733	0.967813	0.986457	0.997172	-0.014875	395.739	398.916	0.876732	-0.0115319	213.912	189.455	0.649867	0.175075
Higher RPS in Berkshire	6	167976378	ENSSSCG00000024697	TMEM125	18.892	16.8639	0.0114562	2.0281	Active	3.54138	4.41804	0.444929	167820000	167825000	Less activity	9.24866	23.6647	0.19179	-14.4161	0.646245	0.800853	0.995949	0.996232	0.9976	0.994102	0.994733	0.9989	-0.0113217	76.4179	103.584	0.42072	-0.43833	40.7534	38.0686	0.533536	0.0980689
Higher RPS in Berkshire	6	167976378	ENSSSCG00000024697	TMEM125	18.892	16.8639	0.0114562	2.0281	Active	3.54138	4.41804	0.444929	167830000	167835000	Less activity	33.3538	17.6025	0.501631	15.7513	0.984265	0.123628	0.995949	0.996232	0.9976	0.995602	0.996103	0.9968	-0.0121679	76.4179	103.584	0.42072	-0.43833	27.8708	23.8171	0.608895	0.225878
Higher RPS in Berkshire	6	167976378	ENSSSCG00000024697	TMEM125	18.892	16.8639	0.0114562	2.0281	Active	3.54138	4.41804	0.444929	167835000	167840000	Moderate activity	24.0994	14.286	0.231315	9.81341	0.935747	0.761263	0.995949	0.996232	0.9976	0.994174	0.995254	0.998206	-0.0126019	76.4179	103.584	0.42072	-0.43833	39.8639	34.5679	0.194224	0.205096
Higher RPS in Berkshire	6	167976378	ENSSSCG00000024697	TMEM125	18.892	16.8639	0.0114562	2.0281	Active	3.54138	4.41804	0.444929	167840000	167845000	Moderate activity	29.208	29.4498	0.973578	-0.241806	0.976382	0.703559	0.995949	0.996232	0.9976	0.990815	0.992822	0.999767	-0.0130769	76.4179	103.584	0.42072	-0.43833	78.5276	65.6749	0.34915	0.257499
Higher RPS in Berkshire	6	167976378	ENSSSCG00000024697	TMEM125	18.892	16.8639	0.0114562	2.0281	Active	3.54138	4.41804	0.444929	167845000	167850000	Moderate activity	31.2306	25.0317	0.305808	6.19892	0.933994	0.565904	0.995949	0.996232	0.9976	0.983679	0.986585	1	-0.013834	76.4179	103.584	0.42072	-0.43833	48.5556	43.1262	0.0503642	0.170699
Higher RPS in Berkshire	6	167976378	ENSSSCG00000024697	TMEM125	18.892	16.8639	0.0114562	2.0281	Active	3.54138	4.41804	0.444929	167850000	167855000	Moderate activity	31.7598	22.157	0.102444	9.60275	0.819399	0.699517	0.995949	0.996232	0.9976	0.980508	0.996907	1	-0.0147771	76.4179	103.584	0.42072	-0.43833	127.729	106.018	0.247471	0.268549
Higher RPS in Berkshire	6	167976378	ENSSSCG00000024697	TMEM125	18.892	16.8639	0.0114562	2.0281	Active	3.54138	4.41804	0.444929	167855000	167860000	Moderate activity	32.622	22.2329	0.275389	10.3891	0.657159	0.529454	0.995949	0.996232	0.9976	0.99046	0.995698	1	-0.0154543	76.4179	103.584	0.42072	-0.43833	59.6703	55.027	0.321214	0.116669
Higher RPS in Berkshire	6	167976378	ENSSSCG00000024697	TMEM125	18.892	16.8639	0.0114562	2.0281	Active	3.54138	4.41804	0.444929	167865000	167870000	Less activity	41.1949	25.2749	0.067889	15.92	0.823211	0.399789	0.995949	0.996232	0.9976	0.995351	0.996101	0.999733	-0.0169524	76.4179	103.584	0.42072	-0.43833	43.755	43.7477	0.998374	0.000242635
Higher RPS in Berkshire	6	167976378	ENSSSCG00000024697	TMEM125	18.892	16.8639	0.0114562	2.0281	Active	3.54138	4.41804	0.444929	167870000	167875000	Less activity	28.4133	22.0791	0.452127	6.33421	0.984959	0.866975	0.995949	0.996232	0.9976	0.9946	0.995533	0.999733	-0.01786	76.4179	103.584	0.42072	-0.43833	66.6458	47.6846	0.0581389	0.482132
Higher RPS in Berkshire	6	167976378	ENSSSCG00000024697	TMEM125	18.892	16.8639	0.0114562	2.0281	Active	3.54138	4.41804	0.444929	167875000	167880000	Less activity	41.1429	23.6847	0.036742	17.4582	0.75437	0.609372	0.995949	0.996232	0.9976	0.978511	0.997171	0.998701	-0.0193684	76.4179	103.584	0.42072	-0.43833	159.463	82.1031	0.176088	0.956859
Higher RPS in Berkshire	6	167976378	ENSSSCG00000024697	TMEM125	18.892	16.8639	0.0114562	2.0281	Active	3.54138	4.41804	0.444929	167885000	167890000	Less activity	32.4858	20.2238	0.382323	12.262	0.882527	0.674129	0.995949	0.996232	0.9976	0.987223	0.993291	0.997173	-0.0216176	76.4179	103.584	0.42072	-0.43833	129.268	88.4144	0.105731	0.547494
Higher RPS in Berkshire	6	167976378	ENSSSCG00000024697	TMEM125	18.892	16.8639	0.0114562	2.0281	Active	3.54138	4.41804	0.444929	167895000	167900000	Less activity	37.797	26.8309	0.212002	10.9661	0.753287	0.387443	0.995949	0.996232	0.9976	0.99102	0.998602	1	-0.0244333	76.4179	103.584	0.42072	-0.43833	48.4381	49.0383	0.869687	-0.0177303
Higher RPS in Berkshire	6	167976378	ENSSSCG00000024697	TMEM125	18.892	16.8639	0.0114562	2.0281	Active	3.54138	4.41804	0.444929	167900000	167905000	Less activity	28.0197	25.3771	0.651003	2.64262	0.890474	0.454463	0.995949	0.996232	0.9976	0.989954	0.998034	1	-0.0261786	76.4179	103.584	0.42072	-0.43833	68.2016	67.1771	0.959093	0.0218039
Higher RPS in Berkshire	2	5745464	ENSSSCG00000038304	Unknown	16.2418	15.2618	0.0161464	0.979953	Active	19.6593	20.6447	0.487775	5820000	5825000	Less activity	34.7316	28.3587	0.547403	6.37289	0.265432	0.480327	0.996553	0.997237	0.9996	0.945359	0.961594	0.995813	0.00183929	121.857	120.998	0.925841	0.0101967	69.0567	61.9857	0.117427	0.155608
Higher RPS in Berkshire	2	5745464	ENSSSCG00000038304	Unknown	16.2418	15.2618	0.0161464	0.979953	Active	19.6593	20.6447	0.487775	5825000	5830000	Less activity	30.4642	30.5532	0.991089	-0.0890541	0.719122	0.565656	0.996553	0.997237	0.9996	0.955371	0.942071	0.967121	-0.00146667	121.857	120.998	0.925841	0.0101967	46.9744	39.508	0.0303031	0.24915
Higher RPS in Berkshire	2	5745464	ENSSSCG00000038304	Unknown	16.2418	15.2618	0.0161464	0.979953	Active	19.6593	20.6447	0.487775	5840000	5845000	Less activity	70.916	71.0667	0.990323	-0.150748	0.667965	0.606816	0.996553	0.997237	0.9996	0.980828	0.9826	0.985085	0.00177778	121.857	120.998	0.925841	0.0101967	38.8138	29.921	0.309072	0.37431
Higher RPS in Berkshire	2	5745464	ENSSSCG00000038304	Unknown	16.2418	15.2618	0.0161464	0.979953	Active	19.6593	20.6447	0.487775	5845000	5850000	Less activity	101.642	83.0376	0.258703	18.6042	0.984399	0.72976	0.996553	0.997237	0.9996	0.952317	0.952409	0.948387	0.00167632	121.857	120.998	0.925841	0.0101967	52.9145	62.9166	0.166695	-0.249346
Higher RPS in Berkshire	2	5745464	ENSSSCG00000038304	Unknown	16.2418	15.2618	0.0161464	0.979953	Active	19.6593	20.6447	0.487775	5850000	5855000	Less activity	95.649	78.6667	0.167729	16.9823	0.727285	0.685579	0.996553	0.997237	0.9996	0.954674	0.959221	0.953392	0.000735	121.857	120.998	0.925841	0.0101967	40.8719	45.9598	0.0474441	-0.168875
Higher RPS in Berkshire	2	5745464	ENSSSCG00000038304	Unknown	16.2418	15.2618	0.0161464	0.979953	Active	19.6593	20.6447	0.487775	5860000	5865000	Less activity	38.992	31.8179	0.44452	7.17406	0.506782	0.565518	0.996553	0.997237	0.9996	0.986578	0.994332	0.991064	0.000286364	121.857	120.998	0.925841	0.0101967	45.5007	44.538	0.781039	0.0307828
Higher RPS in Berkshire	2	5745464	ENSSSCG00000038304	Unknown	16.2418	15.2618	0.0161464	0.979953	Active	19.6593	20.6447	0.487775	5865000	5870000	Less activity	33.3179	31.2644	0.772124	2.05345	0.484778	0.509459	0.996553	0.997237	0.9996	0.988203	0.993164	0.991906	0.000243478	121.857	120.998	0.925841	0.0101967	34.9281	35.8955	0.700389	-0.0393018
Higher RPS in Berkshire	2	5745464	ENSSSCG00000038304	Unknown	16.2418	15.2618	0.0161464	0.979953	Active	19.6593	20.6447	0.487775	5875000	5880000	Less activity	30.0567	30.6474	0.954172	-0.590701	0.711483	0.607003	0.996553	0.997237	0.9996	0.989186	0.99261	0.994701	0.000212	121.857	120.998	0.925841	0.0101967	42.5563	39.8297	0.368185	0.0952975
Higher RPS in Berkshire	2	5745464	ENSSSCG00000038304	Unknown	16.2418	15.2618	0.0161464	0.979953	Active	19.6593	20.6447	0.487775	5880000	5885000	Less activity	24.869	14.1283	0.110268	10.7407	0.51812	0.429812	0.996553	0.997237	0.9996	0.985557	0.986313	0.991447	0.000190385	121.857	120.998	0.925841	0.0101967	27.6356	26.4598	0.782432	0.062496
Higher RPS in Berkshire	2	5745464	ENSSSCG00000038304	Unknown	16.2418	15.2618	0.0161464	0.979953	Active	19.6593	20.6447	0.487775	5885000	5890000	Less activity	24.3416	11.9786	0.0718478	12.3631	0.41708	0.730622	0.996553	0.997237	0.9996	0.989872	0.989847	0.994435	0.000137037	121.857	120.998	0.925841	0.0101967	34.2639	29.935	0.360911	0.194248
Higher RPS in Berkshire	2	7823927	ENSSSCG00000013031	KCNK4	10.1592	8.10654	0.00413258	2.05267	Active	0	0	-	7885000	7890000	Less activity	34.8128	15.3187	0.0634996	19.4941	0.519954	0.481837	0.993805	0.995205	0.998267	0.990763	0.99344	0.99594	-5e-05	44.3548	44.6695	0.946653	-0.0101762	58.9969	51.0566	0.143868	0.208161
Higher RPS in Berkshire	2	7823927	ENSSSCG00000013031	KCNK4	10.1592	8.10654	0.00413258	2.05267	Active	0	0	-	7900000	7905000	Less activity	39.5737	15.2491	0.0685483	24.3246	0.133702	0.495859	0.993805	0.995205	0.998267	0.951697	0.966557	1	-0.00197	44.3548	44.6695	0.946653	-0.0101762	34.2802	29.4566	0.105903	0.218098
Higher RPS in Berkshire	2	7823927	ENSSSCG00000013031	KCNK4	10.1592	8.10654	0.00413258	2.05267	Active	0	0	-	7905000	7910000	Less activity	46.8192	25.8693	0.170377	20.9499	0.481209	0.239458	0.993805	0.995205	0.998267	0.989856	0.987001	0.9995	-0.00425938	44.3548	44.6695	0.946653	-0.0101762	96.3417	100.785	0.510934	-0.0649841
Higher RPS in Berkshire	2	7823927	ENSSSCG00000013031	KCNK4	10.1592	8.10654	0.00413258	2.05267	Active	0	0	-	7910000	7915000	Less activity	31.8638	40.6441	0.565602	-8.78031	0.726897	0.346884	0.993805	0.995205	0.998267	0.993156	0.991668	0.996209	-0.00383235	44.3548	44.6695	0.946653	-0.0101762	83.4982	89.0835	0.346982	-0.0933041
Higher RPS in Berkshire	2	7823927	ENSSSCG00000013031	KCNK4	10.1592	8.10654	0.00413258	2.05267	Active	0	0	-	7920000	7925000	Less activity	24.3607	23.0879	0.815518	1.27288	0.208762	0.303195	0.993805	0.995205	0.998267	0.995404	0.995705	0.997301	-0.00332895	44.3548	44.6695	0.946653	-0.0101762	182.99	176.456	0.485337	0.052428
Higher RPS in Berkshire	2	7823927	ENSSSCG00000013031	KCNK4	10.1592	8.10654	0.00413258	2.05267	Active	0	0	-	7925000	7930000	Moderate activity	25.8797	8.13177	0.094813	17.7479	0.351453	0.484126	0.993805	0.995205	0.998267	0.993231	0.99231	0.996969	-0.0031575	44.3548	44.6695	0.946653	-0.0101762	145.023	129.31	0.403106	0.165326
Higher RPS in Berkshire	2	7823927	ENSSSCG00000013031	KCNK4	10.1592	8.10654	0.00413258	2.05267	Active	0	0	-	7930000	7935000	Moderate activity	23.7183	8.29159	0.0993366	15.4267	0.370386	0.186316	0.993805	0.995205	0.998267	0.984724	0.995704	0.989698	-0.00302381	44.3548	44.6695	0.946653	-0.0101762	30.5996	34.9711	0.260525	-0.192064
Higher RPS in Berkshire	2	8408512	ENSSSCG00000026914	PLAAT3	9.24182	7.16942	0.00505743	2.0724	Inactive	12.9294	13.0125	0.498398	8445000	8450000	Less activity	34.803	35.4758	0.976377	-0.672776	0.0586911	0.0167155	0.989164	0.9997	1	0.978558	0.988658	0.997672	-0.02235	29.5101	27.4758	0.522662	0.102687	38.1178	39.6116	0.755911	-0.0553167
Higher RPS in Berkshire	2	8408512	ENSSSCG00000026914	PLAAT3	9.24182	7.16942	0.00505743	2.0724	Inactive	12.9294	13.0125	0.498398	8465000	8470000	Moderate activity	44.3727	22.5524	0.225517	21.8202	0.179869	0.0341869	0.989164	0.9997	1	0.975693	0.979059	0.988349	-0.0134909	29.5101	27.4758	0.522662	0.102687	54.4237	40.9625	0.204585	0.40906
Higher RPS in Berkshire	2	8408512	ENSSSCG00000026914	PLAAT3	9.24182	7.16942	0.00505743	2.0724	Inactive	12.9294	13.0125	0.498398	8470000	8475000	Less activity	44.7135	13.8559	0.101658	30.8576	0.0187871	0.18239	0.989164	0.9997	1	0.982031	0.989707	0.994113	-0.0125792	29.5101	27.4758	0.522662	0.102687	50.0864	53.828	0.256784	-0.103739
Higher RPS in Berkshire	2	8408512	ENSSSCG00000026914	PLAAT3	9.24182	7.16942	0.00505743	2.0724	Inactive	12.9294	13.0125	0.498398	8480000	8485000	Less activity	44.1277	18.9638	0.00170674	25.1638	0.474371	0.275009	0.989164	0.9997	1	0.974318	0.9807	0.993541	-0.0189714	29.5101	27.4758	0.522662	0.102687	34.8426	34.361	0.563425	0.0200203
Higher RPS in Berkshire	2	8408512	ENSSSCG00000026914	PLAAT3	9.24182	7.16942	0.00505743	2.0724	Inactive	12.9294	13.0125	0.498398	8485000	8490000	Less activity	37.0473	18.8356	0.00717548	18.2117	0.154051	0.213294	0.989164	0.9997	1	0.835592	0.779996	0.858242	-0.01806	29.5101	27.4758	0.522662	0.102687	43.0763	41.724	0.742332	0.0459086
Higher RPS in Berkshire	2	8408512	ENSSSCG00000026914	PLAAT3	9.24182	7.16942	0.00505743	2.0724	Inactive	12.9294	13.0125	0.498398	8490000	8495000	High activity	24.7597	11.5701	0.125289	13.1896	0.321624	0.237646	0.989164	0.9997	1	0.921131	0.982229	0.992809	-0.0133094	29.5101	27.4758	0.522662	0.102687	47.7293	38.8061	0.0770907	0.297896
Higher RPS in Berkshire	2	9735293	ENSSSCG00000024015	FADS1	14.1842	12.7898	0.0397969	1.39439	Active	80.5598	65.5655	0.551306	9460000	9465000	Less activity	26.0313	27.7812	0.730563	-1.74996	0.663253	0.305318	0.993202	0.9991	0.993169	0.954964	0.966439	0.964285	-0.0026963	425.279	418.468	0.845527	0.0232868	22.0476	26.0965	0.375866	-0.242225
Higher RPS in Berkshire	2	9735293	ENSSSCG00000024015	FADS1	14.1842	12.7898	0.0397969	1.39439	Active	80.5598	65.5655	0.551306	9465000	9470000	Less activity	26.6912	23.9659	0.26118	2.72528	0.311832	0.628303	0.993202	0.9991	0.993169	0.92396	0.964238	0.97999	-0.00232358	425.279	418.468	0.845527	0.0232868	30.3585	27.7162	0.475823	0.130915
Higher RPS in Berkshire	2	9735293	ENSSSCG00000024015	FADS1	14.1842	12.7898	0.0397969	1.39439	Active	80.5598	65.5655	0.551306	9470000	9475000	Moderate activity	23.6436	25.0964	0.761296	-1.45279	0.281299	0.471575	0.993202	0.9991	0.993169	0.979262	0.991711	0.987674	-0.00226346	425.279	418.468	0.845527	0.0232868	40.8449	40.8231	0.99396	0.000770971
Higher RPS in Berkshire	2	9735293	ENSSSCG00000024015	FADS1	14.1842	12.7898	0.0397969	1.39439	Active	80.5598	65.5655	0.551306	9595000	9600000	Less activity	16.2453	2.74106	0.0608264	13.5043	0.105347	0.12356	0.993202	0.9991	0.993169	0.99209	0.996308	0.996406	-0.00372222	425.279	418.468	0.845527	0.0232868	46.5073	50.2991	0.491879	-0.112842
Higher RPS in Berkshire	2	9735293	ENSSSCG00000024015	FADS1	14.1842	12.7898	0.0397969	1.39439	Active	80.5598	65.5655	0.551306	9625000	9630000	High activity	24.6601	12.7629	0.166156	11.8972	0.382565	0.331538	0.993202	0.9991	0.993169	0.983824	0.986952	0.993929	-0.00433333	425.279	418.468	0.845527	0.0232868	66.6796	63.1765	0.519218	0.0777365
Higher RPS in Berkshire	2	9735293	ENSSSCG00000024015	FADS1	14.1842	12.7898	0.0397969	1.39439	Active	80.5598	65.5655	0.551306	9640000	9645000	High activity	29.0067	25.3641	0.0584481	3.64261	0.253038	0.350354	0.993202	0.9991	0.993169	0.986943	0.993834	0.986753	-0.00523611	425.279	418.468	0.845527	0.0232868	73.2843	77.9247	0.213594	-0.08846
Higher RPS in Berkshire	2	9735293	ENSSSCG00000024015	FADS1	14.1842	12.7898	0.0397969	1.39439	Active	80.5598	65.5655	0.551306	9650000	9655000	High activity	37.3357	30.8879	0.48496	6.44782	0.681073	0.485861	0.993202	0.9991	0.993169	0.979502	0.991893	0.969109	-0.0066875	425.279	418.468	0.845527	0.0232868	107.518	82.4898	0.433447	0.381881
Higher RPS in Berkshire	2	9735293	ENSSSCG00000024015	FADS1	14.1842	12.7898	0.0397969	1.39439	Active	80.5598	65.5655	0.551306	9655000	9660000	High activity	26.057	24.2372	0.871463	1.81984	0.239686	0.195554	0.993202	0.9991	0.993169	0.99324	0.996447	0.99539	-0.00715	425.279	418.468	0.845527	0.0232868	102.066	86.4278	0.207115	0.239678
Higher RPS in Berkshire	2	9735293	ENSSSCG00000024015	FADS1	14.1842	12.7898	0.0397969	1.39439	Active	80.5598	65.5655	0.551306	9685000	9690000	High activity	30.0521	24.0078	0.457837	6.04433	0.522802	0.311397	0.993202	0.9991	0.993169	0.991432	0.990548	0.9959	0.000683333	425.279	418.468	0.845527	0.0232868	107.225	81.8526	0.196705	0.389126
Higher RPS in Berkshire	2	9735293	ENSSSCG00000024015	FADS1	14.1842	12.7898	0.0397969	1.39439	Active	80.5598	65.5655	0.551306	9690000	9695000	High activity	43.029	28.6795	0.192963	14.3495	0.269475	0.0807517	0.993202	0.9991	0.993169	0.991266	0.991091	0.990397	0.000525	425.279	418.468	0.845527	0.0232868	75.5618	54.1977	0.449895	0.478674
Higher RPS in Berkshire	2	13918904	ENSSSCG00000050774	Unknown	13.6273	10.0153	0.0454425	3.61195	Inactive	0.200888	0.200888	-	13710000	13715000	Less activity	13.7426	13.7844	0.997472	-0.0418152	0.368844	0.318361	0.789457	0.991848	0.864531	0.9972	0.999033	0.9995	0.00104625	21.7443	21.688	0.980358	0.00372145	13.7776	11.0948	0.117852	0.309926
Higher RPS in Berkshire	2	13918904	ENSSSCG00000050774	Unknown	13.6273	10.0153	0.0454425	3.61195	Inactive	0.200888	0.200888	-	13715000	13720000	Less activity	19.686	25.4603	0.623392	-5.77435	0.475779	0.269038	0.789457	0.991848	0.864531	0.9985	0.999433	0.9997	0.00107821	21.7443	21.688	0.980358	0.00372145	5.74403	4.03357	0.13477	0.499575
Higher RPS in Berkshire	2	13918904	ENSSSCG00000050774	Unknown	13.6273	10.0153	0.0454425	3.61195	Inactive	0.200888	0.200888	-	13725000	13730000	Less activity	23.6881	5.94244	0.205866	17.7457	0.44935	0.512656	0.789457	0.991848	0.864531	0.9987	0.9986	0.9988	0.00114459	21.7443	21.688	0.980358	0.00372145	5.6057	5.27322	0.672105	0.0866169
Higher RPS in Berkshire	2	13918904	ENSSSCG00000050774	Unknown	13.6273	10.0153	0.0454425	3.61195	Inactive	0.200888	0.200888	-	13730000	13735000	Moderate activity	17.3877	19.8495	0.79698	-2.46181	0.504574	0.464363	0.789457	0.991848	0.864531	0.9998	0.9997	0.9999	0.00117778	21.7443	21.688	0.980358	0.00372145	1.14625	0.509798	0.304101	1.03119
Higher RPS in Berkshire	2	13918904	ENSSSCG00000050774	Unknown	13.6273	10.0153	0.0454425	3.61195	Inactive	0.200888	0.200888	-	13755000	13760000	Moderate activity	4.4575	17.9711	0.169742	-13.5136	0.308279	0.310137	0.789457	0.991848	0.864531	0.998249	0.998166	0.998333	0.00176129	21.7443	21.688	0.980358	0.00372145	7.66823	12.1385	0.195129	-0.655764
Higher RPS in Berkshire	2	13918904	ENSSSCG00000050774	Unknown	13.6273	10.0153	0.0454425	3.61195	Inactive	0.200888	0.200888	-	13800000	13805000	Less activity	23.4207	10.7785	0.308831	12.6422	0.2707	0.302594	0.789457	0.991848	0.864531	0.996677	0.996801	0.998368	0.000418182	21.7443	21.688	0.980358	0.00372145	9.18068	9.58083	0.718195	-0.0608995
Higher RPS in Berkshire	2	13918904	ENSSSCG00000050774	Unknown	13.6273	10.0153	0.0454425	3.61195	Inactive	0.200888	0.200888	-	13810000	13815000	Less activity	47.9625	9.97112	0.0119366	37.9914	0.414094	0.151501	0.789457	0.991848	0.864531	0.99985	0.9999	1	0.00046	21.7443	21.688	0.980358	0.00372145	1.0577	0.939508	0.818261	0.155361
Higher RPS in Berkshire	2	13918904	ENSSSCG00000050774	Unknown	13.6273	10.0153	0.0454425	3.61195	Inactive	0.200888	0.200888	-	13820000	13825000	Less activity	2.40694	26.2168	0.153604	-23.8099	0.267082	0.197069	0.789457	0.991848	0.864531	0.997231	0.999002	0.998936	0.000511111	21.7443	21.688	0.980358	0.00372145	6.70222	8.3439	0.440946	-0.311904
Higher RPS in Berkshire	2	13918904	ENSSSCG00000050774	Unknown	13.6273	10.0153	0.0454425	3.61195	Inactive	0.200888	0.200888	-	13825000	13830000	Less activity	45.8604	4.98671	0.299526	40.8737	0.451572	0.425174	0.789457	0.991848	0.864531	0.996799	0.996665	0.9992	0.000535294	21.7443	21.688	0.980358	0.00372145	3.28308	6.2996	0.224268	-0.919642
Higher RPS in Berkshire	2	13918904	ENSSSCG00000050774	Unknown	13.6273	10.0153	0.0454425	3.61195	Inactive	0.200888	0.200888	-	13830000	13835000	Less activity	36.2595	20.8566	0.188218	15.4029	0.602549	0.129693	0.789457	0.991848	0.864531	0.99855	0.9987	1	0.00051875	21.7443	21.688	0.980358	0.00372145	1.25057	1.86067	0.406279	-0.537781
Higher RPS in Berkshire	2	13918904	ENSSSCG00000050774	Unknown	13.6273	10.0153	0.0454425	3.61195	Inactive	0.200888	0.200888	-	13835000	13840000	Less activity	36.9562	5.77456	0.0723225	31.1817	0.394869	0.270722	0.789457	0.991848	0.864531	0.9975	0.999333	0.9978	0.000553333	21.7443	21.688	0.980358	0.00372145	5.42097	8.79944	0.0845232	-0.688792
Higher RPS in Berkshire	2	13918904	ENSSSCG00000050774	Unknown	13.6273	10.0153	0.0454425	3.61195	Inactive	0.200888	0.200888	-	13840000	13845000	Less activity	37.831	30.5338	0.752853	7.29719	0.161001	0.0590231	0.789457	0.991848	0.864531	0.99995	1	0.9999	0.000592857	21.7443	21.688	0.980358	0.00372145	1.19159	1.00962	0.747389	0.219077
Higher RPS in Berkshire	2	14191168	ENSSSCG00000050639	OR4C11	6.86672	4.05029	0.0268369	2.81643	Inactive	0	0	-	14160000	14165000	Less activity	43.1191	6.52727	0.083046	36.5918	0.384163	0.483884	0.994425	0.994334	0.996266	0.99362	0.99099	0.995732	0.00172	13.0342	14.1564	0.695677	-0.118285	10.3024	7.6852	0.427555	0.418103
Higher RPS in Berkshire	2	14191168	ENSSSCG00000050639	OR4C11	6.86672	4.05029	0.0268369	2.81643	Inactive	0	0	-	14220000	14225000	Less activity	39.5455	10.2459	0.111085	29.2997	0.145581	0.28704	0.994425	0.994334	0.996266	0.993104	0.990741	0.998567	-0.00176	13.0342	14.1564	0.695677	-0.118285	28.0845	25.4259	0.569263	0.14294
Higher RPS in Berkshire	2	14191168	ENSSSCG00000050639	OR4C11	6.86672	4.05029	0.0268369	2.81643	Inactive	0	0	-	14230000	14235000	Less activity	25.8195	14.377	0.234161	11.4425	0.0832752	0.243121	0.994425	0.994334	0.996266	0.9997	0.999567	0.9999	-0.00115714	13.0342	14.1564	0.695677	-0.118285	1.36088	1.88385	0.404776	-0.441466
Higher RPS in Berkshire	2	14191168	ENSSSCG00000050639	OR4C11	6.86672	4.05029	0.0268369	2.81643	Inactive	0	0	-	14340000	14345000	Less activity	11.5213	19.743	0.482119	-8.22163	0	0	0.994425	0.994334	0.996266	1	1	1	-0.00191207	13.0342	14.1564	0.695677	-0.118285	0.496233	0	0.0925695	-
Higher RPS in Berkshire	2	14191168	ENSSSCG00000050639	OR4C11	6.86672	4.05029	0.0268369	2.81643	Inactive	0	0	-	14345000	14350000	Less activity	10.6782	14.415	0.86763	-3.7368	0.0866865	0.322997	0.994425	0.994334	0.996266	0.9998	0.999733	1	-0.00184833	13.0342	14.1564	0.695677	-0.118285	1.09629	4.06544	0.187435	-1.7999
Higher RPS in Berkshire	2	14191168	ENSSSCG00000050639	OR4C11	6.86672	4.05029	0.0268369	2.81643	Inactive	0	0	-	14355000	14360000	Less activity	39.0491	4.58962	0.0542666	34.4595	0.0842697	0.270881	0.994425	0.994334	0.996266	1	1	1	-0.00173281	13.0342	14.1564	0.695677	-0.118285	0	0	NA	-
Higher RPS in Berkshire	2	21436392	ENSSSCG00000013286	LRRC4C	5.55626	5.08852	0.0303104	0.46774	Inactive	0.706818	0.61483	0.5348	20660000	20665000	Less activity	24.3135	19.9262	0.105219	4.38727	0.635654	0.908424	0.976775	0.973365	0.997964	0.990296	0.993043	0.997606	0.00326688	23.1828	23.3321	0.958093	-0.00921969	20.7154	21.7794	0.677091	-0.0719203
Higher RPS in Berkshire	2	21436392	ENSSSCG00000013286	LRRC4C	5.55626	5.08852	0.0303104	0.46774	Inactive	0.706818	0.61483	0.5348	20665000	20670000	Less activity	25.7329	20.0376	0.0408885	5.69524	0.645263	0.869844	0.976775	0.973365	0.997964	0.990549	0.984929	0.997599	0.00327418	23.1828	23.3321	0.958093	-0.00921969	12.1302	14.0824	0.267116	-0.213659
Higher RPS in Berkshire	2	21436392	ENSSSCG00000013286	LRRC4C	5.55626	5.08852	0.0303104	0.46774	Inactive	0.706818	0.61483	0.5348	20670000	20675000	Less activity	24.4231	17.4743	0.257079	6.94878	0.922212	0.846019	0.976775	0.973365	0.997964	0.980314	0.990386	0.985356	0.00335197	23.1828	23.3321	0.958093	-0.00921969	25.0383	24.2956	0.644277	0.0432661
Higher RPS in Berkshire	2	21436392	ENSSSCG00000013286	LRRC4C	5.55626	5.08852	0.0303104	0.46774	Inactive	0.706818	0.61483	0.5348	20675000	20680000	Less activity	21.499	15.2185	0.211263	6.28049	0.96721	0.628661	0.976775	0.973365	0.997964	0.988727	0.991063	0.992335	0.00338411	23.1828	23.3321	0.958093	-0.00921969	27.4472	23.8804	0.346114	0.200051
Higher RPS in Berkshire	2	50410318	ENSSSCG00000014467	OR5T2	2.72112	1.50891	0.00173487	1.21221	Inactive	0.025356	0.025356	-	50465000	50470000	Less activity	27.2357	32.7282	0.740518	-5.49248	0.535407	0.0691551	0.978434	0.976284	0.9997	0.9997	0.999533	1	0.00131	6.21016	6.51958	0.819033	-0.0690611	1.69696	2.81273	0.37731	-0.696812
Higher RPS in Berkshire	2	50410318	ENSSSCG00000014467	OR5T2	2.72112	1.50891	0.00173487	1.21221	Inactive	0.025356	0.025356	-	50470000	50475000	Less activity	43.3937	1.87577	0.0753806	41.5179	0.377557	0.780682	0.978434	0.976284	0.9997	0.9999	0.9998	1	0.00119091	6.21016	6.51958	0.819033	-0.0690611	0.290442	0.188106	0.391002	-
Higher RPS in Berkshire	2	50419625	ENSSSCG00000037859	OR8J2	4.11829	2.16887	0.0317333	1.94942	Inactive	0	0	-	50465000	50470000	Less activity	22.8488	10.7612	0.356553	12.0876	0.286024	0.47568	0.9984	0.997533	0.9998	0.9997	0.999533	1	0.0014	6.7564	6.0827	0.794671	0.149214	1.69696	2.81273	0.37731	-0.696812
Higher RPS in Berkshire	2	50419625	ENSSSCG00000037859	OR8J2	4.11829	2.16887	0.0317333	1.94942	Inactive	0	0	-	50470000	50475000	Less activity	12.5534	31.739	0.119886	-19.1856	0.595918	0.520811	0.9984	0.997533	0.9998	0.9999	0.9998	1	0.00126	6.7564	6.0827	0.794671	0.149214	0.290442	0.188106	0.391002	-
Higher RPS in Berkshire	2	50419625	ENSSSCG00000037859	OR8J2	4.11829	2.16887	0.0317333	1.94942	Inactive	0	0	-	50475000	50480000	Less activity	32.5252	24.5225	0.757356	8.00261	0.250804	0.619708	0.9984	0.997533	0.9998	1	1	1	0.00114545	6.7564	6.0827	0.794671	0.149214	0	1.00392	0.12026	-3.46456
Higher RPS in Berkshire	2	50419625	ENSSSCG00000037859	OR8J2	4.11829	2.16887	0.0317333	1.94942	Inactive	0	0	-	50480000	50485000	Less activity	60.1281	0	0.296019	60.1281	0.0732128	0.148004	0.9984	0.997533	0.9998	1	1	1	0.00105	6.7564	6.0827	0.794671	0.149214	0	2.50269	0.0933844	-4.70193
Higher RPS in Berkshire	2	54018364	ENSSSCG00000042335	OR2M7	8.28434	4.42054	0.0225847	3.8638	Inactive	0	0	-	54855000	54860000	Less activity	30.6178	9.05825	0.0857504	21.5596	0.849845	0.293424	0.984501	0.9692	0.9998	0.981966	0.991146	0.9999	-0.0036503	5.43652	6.97381	0.131696	-0.353506	19.8983	16.3065	0.0354437	0.28561
Higher RPS in Berkshire	2	54018364	ENSSSCG00000042335	OR2M7	8.28434	4.42054	0.0225847	3.8638	Inactive	0	0	-	54860000	54865000	Less activity	57.1986	12.4682	0.171494	44.7303	0.890432	0.545753	0.984501	0.9692	0.9998	0.992708	0.995172	0.9999	-0.00364256	5.43652	6.97381	0.131696	-0.353506	11.763	15.5106	0.216651	-0.396051
Higher RPS in Berkshire	2	54018364	ENSSSCG00000042335	OR2M7	8.28434	4.42054	0.0225847	3.8638	Inactive	0	0	-	54870000	54875000	Less activity	50.2874	7.5758	0.00862151	42.7116	0.802989	0.796722	0.984501	0.9692	0.9998	0.99006	0.993176	1	-0.00359059	5.43652	6.97381	0.131696	-0.353506	17.3345	21.1136	0.478239	-0.283045
Higher RPS in Berkshire	2	54018364	ENSSSCG00000042335	OR2M7	8.28434	4.42054	0.0225847	3.8638	Inactive	0	0	-	54875000	54880000	Less activity	31.4581	5.58599	0.063022	25.8721	0.647917	0.42917	0.984501	0.9692	0.9998	0.992257	0.995405	0.9999	-0.00356023	5.43652	6.97381	0.131696	-0.353506	14.2769	18.196	0.506456	-0.347775
Higher RPS in Berkshire	2	54018364	ENSSSCG00000042335	OR2M7	8.28434	4.42054	0.0225847	3.8638	Inactive	0	0	-	54885000	54890000	Less activity	29.1485	1.89691	0.0742499	27.2516	0.45642	0.365287	0.984501	0.9692	0.9998	0.981569	0.991359	1	-0.00350491	5.43652	6.97381	0.131696	-0.353506	31.4011	26.9731	0.247833	0.218538
Higher RPS in Berkshire	2	54018364	ENSSSCG00000042335	OR2M7	8.28434	4.42054	0.0225847	3.8638	Inactive	0	0	-	54895000	54900000	Less activity	18.7535	3.07891	0.240152	15.6746	0.4404	0.490697	0.984501	0.9692	0.9998	0.987561	0.989239	0.9998	-0.00346886	5.43652	6.97381	0.131696	-0.353506	24.3213	15.3771	0.116429	0.658003
Higher RPS in Berkshire	2	57820558	ENSSSCG00000045951	Unknown	7.86894	6.08255	0.00770367	1.7864	Inactive	0.105536	0.105536	-	57910000	57915000	Less activity	24.0024	8.9863	0.110696	15.0161	0.579134	0.115048	0.99661	0.994883	0.999733	0.99825	0.9989	0.999733	-0.000314706	5.09286	8.33763	0.309408	-0.70031	24.3847	20.9462	0.332821	0.218318
Higher RPS in Berkshire	2	57820558	ENSSSCG00000045951	Unknown	7.86894	6.08255	0.00770367	1.7864	Inactive	0.105536	0.105536	-	57915000	57920000	Moderate activity	36.1224	17.5205	0.0763762	18.6019	0.405665	0.0765511	0.99661	0.994883	0.999733	0.9982	0.9988	1	-0.000297222	5.09286	8.33763	0.309408	-0.70031	20.37	20.37	0.999988	-2.64294e-06
Higher RPS in Berkshire	2	57820558	ENSSSCG00000045951	Unknown	7.86894	6.08255	0.00770367	1.7864	Inactive	0.105536	0.105536	-	57920000	57925000	Moderate activity	53.5177	22.1619	0.00193493	31.3558	0.347572	0.178875	0.99661	0.994883	0.999733	0.998	0.999134	1	-0.000284211	5.09286	8.33763	0.309408	-0.70031	29.3283	29.3651	0.986739	-0.00180786
Higher RPS in Berkshire	2	57820558	ENSSSCG00000045951	Unknown	7.86894	6.08255	0.00770367	1.7864	Inactive	0.105536	0.105536	-	57925000	57930000	Less activity	45.5303	22.5264	0.00688864	23.0039	0.591256	0.495286	0.99661	0.994883	0.999733	0.9989	0.9996	1	-0.0002775	5.09286	8.33763	0.309408	-0.70031	5.9973	7.1357	0.311463	-0.246962
Higher RPS in Berkshire	2	57820558	ENSSSCG00000045951	Unknown	7.86894	6.08255	0.00770367	1.7864	Inactive	0.105536	0.105536	-	57930000	57935000	Less activity	34.7986	17.8608	0.00366942	16.9379	0.4887	0.790151	0.99661	0.994883	0.999733	0.844231	0.89647	0.999733	-0.000278571	5.09286	8.33763	0.309408	-0.70031	4.95266	6.08644	0.24028	-0.292065
Higher RPS in Berkshire	2	57848414	ENSSSCG00000014539	ZFP62	12.0463	10.9122	0.00652738	1.13412	Active	11.4747	11.3722	0.502244	57890000	57895000	Moderate activity	24.3631	16.1124	0.139523	8.25071	0.676422	0.619902	0.997751	0.999767	0.999733	0.9981	0.9986	0.999867	0.0003125	250.629	296.065	0.0508133	-0.240275	24.5192	22.8341	0.489009	0.10229
Higher RPS in Berkshire	2	57848414	ENSSSCG00000014539	ZFP62	12.0463	10.9122	0.00652738	1.13412	Active	11.4747	11.3722	0.502244	57895000	57900000	Less activity	29.7155	19.648	0.255507	10.0676	0.522463	0.425851	0.997751	0.999767	0.999733	0.9977	0.998134	0.999867	0.000266667	250.629	296.065	0.0508133	-0.240275	92.824	102.101	0.223373	-0.13728
Higher RPS in Berkshire	2	57848414	ENSSSCG00000014539	ZFP62	12.0463	10.9122	0.00652738	1.13412	Active	11.4747	11.3722	0.502244	57905000	57910000	Less activity	33.8304	27.1654	0.409972	6.66497	0.287217	0.375041	0.997751	0.999767	0.999733	0.99535	0.997367	0.999867	0.0002	250.629	296.065	0.0508133	-0.240275	112.985	101.434	0.104787	0.155437
Higher RPS in Berkshire	2	57848414	ENSSSCG00000014539	ZFP62	12.0463	10.9122	0.00652738	1.13412	Active	11.4747	11.3722	0.502244	57910000	57915000	Less activity	37.5801	28.062	0.0797747	9.51804	0.422825	0.58789	0.997751	0.999767	0.999733	0.99825	0.9989	0.999733	0.000283333	250.629	296.065	0.0508133	-0.240275	24.3847	20.9462	0.332821	0.218318
Higher RPS in Berkshire	2	57848414	ENSSSCG00000014539	ZFP62	12.0463	10.9122	0.00652738	1.13412	Active	11.4747	11.3722	0.502244	57915000	57920000	Moderate activity	37.5314	33.8921	0.694218	3.63925	0.70016	0.546017	0.997751	0.999767	0.999733	0.9982	0.9988	1	0.000261538	250.629	296.065	0.0508133	-0.240275	20.37	20.37	0.999988	-2.64294e-06
Higher RPS in Berkshire	2	57848414	ENSSSCG00000014539	ZFP62	12.0463	10.9122	0.00652738	1.13412	Active	11.4747	11.3722	0.502244	57920000	57925000	Moderate activity	50.7063	28.9257	0.014565	21.7806	0.570445	0.481588	0.997751	0.999767	0.999733	0.998	0.999134	1	0.000239286	250.629	296.065	0.0508133	-0.240275	29.3283	29.3651	0.986739	-0.00180786
Higher RPS in Berkshire	2	57848414	ENSSSCG00000014539	ZFP62	12.0463	10.9122	0.00652738	1.13412	Active	11.4747	11.3722	0.502244	57925000	57930000	Less activity	30.759	23.5933	0.0603562	7.16572	0.659658	0.733919	0.997751	0.999767	0.999733	0.9989	0.9996	1	0.000213333	250.629	296.065	0.0508133	-0.240275	5.9973	7.1357	0.311463	-0.246962
Higher RPS in Berkshire	2	57848414	ENSSSCG00000014539	ZFP62	12.0463	10.9122	0.00652738	1.13412	Active	11.4747	11.3722	0.502244	57930000	57935000	Less activity	19.1882	15.816	0.506447	3.37216	0.503961	0.405397	0.997751	0.999767	0.999733	0.844231	0.89647	0.999733	0.00018125	250.629	296.065	0.0508133	-0.240275	4.95266	6.08644	0.24028	-0.292065
Higher RPS in Berkshire	2	62713227	ENSSSCG00000035411	OR7C2	11.1727	7.51239	0.0248087	3.66028	Inactive	0	0	-	62670000	62675000	Less activity	54.7809	7.70011	0.31085	47.0808	0.626785	0.632206	0.99895	0.9987	1	0.9699	0.959867	1	0.00342143	7.36672	5.48765	0.49722	0.418234	0	0.364685	0.210533	-
Higher RPS in Berkshire	2	62713227	ENSSSCG00000035411	OR7C2	11.1727	7.51239	0.0248087	3.66028	Inactive	0	0	-	62735000	62740000	Less activity	20.2771	53.0654	0.166897	-32.7883	0.915302	0.540038	0.99895	0.9987	1	0.99715	0.997033	0.999867	-0.0031	7.36672	5.48765	0.49722	0.418234	8.46803	8.80723	0.87084	-0.0560125
Higher RPS in Berkshire	2	62713227	ENSSSCG00000035411	OR7C2	11.1727	7.51239	0.0248087	3.66028	Inactive	0	0	-	62750000	62755000	Less activity	24.2014	41.8439	0.182729	-17.6425	0.899226	0.190376	0.99895	0.9987	1	0.996009	0.996441	0.999633	-0.00176429	7.36672	5.48765	0.49722	0.418234	2.64443	1.63825	0.338107	0.658868
Higher RPS in Berkshire	2	62713227	ENSSSCG00000035411	OR7C2	11.1727	7.51239	0.0248087	3.66028	Inactive	0	0	-	62760000	62765000	Less activity	18.3255	22.9265	0.867534	-4.60103	0.777412	0.484376	0.99895	0.9987	1	0.99935	0.9987	1	-0.00150556	7.36672	5.48765	0.49722	0.418234	2.51258	1.70301	0.300931	0.535074
Higher RPS in Berkshire	2	62713227	ENSSSCG00000035411	OR7C2	11.1727	7.51239	0.0248087	3.66028	Inactive	0	0	-	62775000	62780000	Less activity	15.9689	12.8086	0.789999	3.1603	0.761233	0.42044	0.99895	0.9987	1	0.99935	0.999	0.9997	-0.001125	7.36672	5.48765	0.49722	0.418234	0.878235	2.27067	0.391002	-1.27704
Higher RPS in Berkshire	2	62713227	ENSSSCG00000035411	OR7C2	11.1727	7.51239	0.0248087	3.66028	Inactive	0	0	-	62780000	62785000	Less activity	28.1173	20.8772	0.371122	7.24012	0.738899	0.604796	0.99895	0.9987	1	0.999275	0.998601	0.9999	-0.00103846	7.36672	5.48765	0.49722	0.418234	2.50925	0.88304	0.391002	1.40831
Higher RPS in Berkshire	2	62713227	ENSSSCG00000035411	OR7C2	11.1727	7.51239	0.0248087	3.66028	Inactive	0	0	-	62800000	62805000	Less activity	28.3556	8.26162	0.0262745	20.094	0.344828	0.342949	0.99895	0.9987	1	0.9994	0.9988	1	-0.00164412	7.36672	5.48765	0.49722	0.418234	2.25832	2.77528	0.391002	-0.285942
Higher RPS in Berkshire	2	62713227	ENSSSCG00000035411	OR7C2	11.1727	7.51239	0.0248087	3.66028	Inactive	0	0	-	62805000	62810000	Less activity	31.9997	5.17555	0.0575365	26.8242	0.443033	0.330418	0.99895	0.9987	1	0.9994	0.9991	0.9996	-0.00155278	7.36672	5.48765	0.49722	0.418234	1.25462	1.88535	0.284263	-0.551504
Higher RPS in Berkshire	2	62713227	ENSSSCG00000035411	OR7C2	11.1727	7.51239	0.0248087	3.66028	Inactive	0	0	-	62855000	62860000	Less activity	72.4968	0	0.198626	72.4968	0.568538	0.600876	0.99895	0.9987	1	1	1	1	-0.00100179	7.36672	5.48765	0.49722	0.418234	0	0	NA	-
Higher RPS in Berkshire	2	62713227	ENSSSCG00000035411	OR7C2	11.1727	7.51239	0.0248087	3.66028	Inactive	0	0	-	62910000	62915000	Less activity	0	22.2428	0.205292	-22.2428	0	0	0.99895	0.9987	1	0.99965	0.999633	0.999867	-0.000719231	7.36672	5.48765	0.49722	0.418234	2.50774	2.12859	0.537982	0.226672
Higher RPS in Berkshire	2	68807191	ENSSSCG00000027434	OLFM2	11.1669	10.5837	0.0489344	0.583214	Active	7.05435	7.48276	0.485265	68850000	68855000	Moderate activity	35.9146	27.1438	0.367569	8.77084	0.546435	0.679519	0.997748	0.997298	0.998365	0.998551	0.998668	0.9999	0.00126875	88.5643	78.3688	0.521869	0.176233	22.4496	17.7304	0.361296	0.338764
Higher RPS in Berkshire	2	68807191	ENSSSCG00000027434	OLFM2	11.1669	10.5837	0.0489344	0.583214	Active	7.05435	7.48276	0.485265	68855000	68860000	Moderate activity	60.7753	41.3358	0.0378145	19.4394	0.342308	0.313965	0.997748	0.997298	0.998365	0.99925	0.9993	0.999867	0.00109444	88.5643	78.3688	0.521869	0.176233	8.19406	7.59847	0.798552	0.107508
Higher RPS in Berkshire	2	68807191	ENSSSCG00000027434	OLFM2	11.1669	10.5837	0.0489344	0.583214	Active	7.05435	7.48276	0.485265	68860000	68865000	Moderate activity	44.8209	24.3804	0.00831668	20.4406	0.350882	0.35456	0.997748	0.997298	0.998365	0.9986	0.9992	0.999867	0.000985	88.5643	78.3688	0.521869	0.176233	35.038	32.9766	0.727551	0.0872201
Higher RPS in Berkshire	2	68807191	ENSSSCG00000027434	OLFM2	11.1669	10.5837	0.0489344	0.583214	Active	7.05435	7.48276	0.485265	68880000	68885000	Less activity	31.8842	33.0177	0.849785	-1.13355	0.385477	0.48093	0.997748	0.997298	0.998365	0.995801	0.997965	0.9989	0.000714286	88.5643	78.3688	0.521869	0.176233	17.6382	15.0165	0.442795	0.23074
Higher RPS in Berkshire	2	68807191	ENSSSCG00000027434	OLFM2	11.1669	10.5837	0.0489344	0.583214	Active	7.05435	7.48276	0.485265	68885000	68890000	Less activity	44.4797	40.0095	0.334669	4.4702	0.562053	0.742012	0.997748	0.997298	0.998365	0.99795	0.9982	0.9999	0.000693333	88.5643	78.3688	0.521869	0.176233	53.4469	58.819	0.636842	-0.137932
Higher RPS in Berkshire	2	68807191	ENSSSCG00000027434	OLFM2	11.1669	10.5837	0.0489344	0.583214	Active	7.05435	7.48276	0.485265	68890000	68895000	Less activity	33.2807	26.4542	0.213947	6.82646	0.391022	0.543221	0.997748	0.997298	0.998365	0.99715	0.999233	0.9998	0.00065	88.5643	78.3688	0.521869	0.176233	59.0032	52.9869	0.213767	0.154879
Higher RPS in Berkshire	2	68807191	ENSSSCG00000027434	OLFM2	11.1669	10.5837	0.0489344	0.583214	Active	7.05435	7.48276	0.485265	68935000	68940000	High activity	31.5368	39.4484	0.13328	-7.91163	0.262421	0.416234	0.997748	0.997298	0.998365	0.997051	0.997767	1	0.000432	88.5643	78.3688	0.521869	0.176233	55.6849	62.7914	0.111792	-0.172988
Higher RPS in Berkshire	2	72391648	ENSSSCG00000013553	VAV1	16.4904	15.1887	0.014741	1.30178	Active	8.53199	9.34142	0.477357	72280000	72285000	Less activity	53.921	16.3256	0.187143	37.5954	0.472389	0.455177	0.999051	0.999267	0.998902	1	1	1	-0.00165238	22.5875	17.4684	0.135516	0.368917	0.062731	1.11878	0.0897652	-2.90488
Higher RPS in Berkshire	2	72391648	ENSSSCG00000013553	VAV1	16.4904	15.1887	0.014741	1.30178	Active	8.53199	9.34142	0.477357	72480000	72485000	Less activity	21.9917	19.561	0.702804	2.43067	0.509028	0.68416	0.999051	0.999267	0.998902	0.99875	0.9995	0.9998	0.000108824	22.5875	17.4684	0.135516	0.368917	17.7139	17.1137	0.895812	0.0494462
Higher RPS in Berkshire	2	72391648	ENSSSCG00000013553	VAV1	16.4904	15.1887	0.014741	1.30178	Active	8.53199	9.34142	0.477357	72485000	72490000	Less activity	22.0077	20.9394	0.872171	1.06833	0.715242	0.593806	0.999051	0.999267	0.998902	0.9991	0.999867	1	9.72222e-05	22.5875	17.4684	0.135516	0.368917	16.8337	17.5372	0.255719	-0.05872
Higher RPS in Berkshire	2	72391648	ENSSSCG00000013553	VAV1	16.4904	15.1887	0.014741	1.30178	Active	8.53199	9.34142	0.477357	72490000	72495000	Less activity	36.4191	22.5192	0.141563	13.8999	0.303138	0.464367	0.999051	0.999267	0.998902	0.9991	0.999867	1	9.21053e-05	22.5875	17.4684	0.135516	0.368917	6.19729	7.74184	0.0201922	-0.316461
Higher RPS in Berkshire	2	72391648	ENSSSCG00000013553	VAV1	16.4904	15.1887	0.014741	1.30178	Active	8.53199	9.34142	0.477357	72495000	72500000	Less activity	27.3943	34.2872	0.278236	-6.89283	0.317443	0.315365	0.999051	0.999267	0.998902	0.99885	0.999233	1	8.75e-05	22.5875	17.4684	0.135516	0.368917	3.70421	4.35341	0.696489	-0.227313
Higher RPS in Berkshire	2	72391648	ENSSSCG00000013553	VAV1	16.4904	15.1887	0.014741	1.30178	Active	8.53199	9.34142	0.477357	72505000	72510000	Less activity	23.8648	14.6329	0.434874	9.23187	0.462948	0.602888	0.999051	0.999267	0.998902	0.99945	0.9995	1	9.31818e-05	22.5875	17.4684	0.135516	0.368917	6.22228	5.17289	0.338352	0.261851
Higher RPS in Berkshire	2	72391648	ENSSSCG00000013553	VAV1	16.4904	15.1887	0.014741	1.30178	Active	8.53199	9.34142	0.477357	72510000	72515000	Less activity	15.4403	13.1614	0.631414	2.27892	0.5094	0.538916	0.999051	0.999267	0.998902	0.9972	0.999333	0.999867	8.91304e-05	22.5875	17.4684	0.135516	0.368917	18.8918	13.1636	0.0731379	0.517898
Higher RPS in Berkshire	2	72391648	ENSSSCG00000013553	VAV1	16.4904	15.1887	0.014741	1.30178	Active	8.53199	9.34142	0.477357	72575000	72580000	Less activity	18.0482	17.6428	0.941704	0.405409	0.299985	0.261199	0.999051	0.999267	0.998902	0.9983	0.9988	0.9998	-0.00398333	22.5875	17.4684	0.135516	0.368917	10.7714	9.40502	0.621821	0.193783
Higher RPS in Berkshire	2	72391648	ENSSSCG00000013553	VAV1	16.4904	15.1887	0.014741	1.30178	Active	8.53199	9.34142	0.477357	72585000	72590000	Less activity	34.9913	33.3803	0.821622	1.61098	0.340202	0.890206	0.999051	0.999267	0.998902	0.996062	0.997409	0.9999	-0.00378553	22.5875	17.4684	0.135516	0.368917	13.6965	13.744	0.984918	-0.0049541
Higher RPS in Berkshire	2	72391648	ENSSSCG00000013553	VAV1	16.4904	15.1887	0.014741	1.30178	Active	8.53199	9.34142	0.477357	72590000	72595000	Less activity	30.0961	29.185	0.897708	0.911117	0.584062	0.320514	0.999051	0.999267	0.998902	0.990836	0.99396	1	-0.00375	22.5875	17.4684	0.135516	0.368917	9.29439	11.994	0.0127824	-0.364419
Higher RPS in Berkshire	2	72391648	ENSSSCG00000013553	VAV1	16.4904	15.1887	0.014741	1.30178	Active	8.53199	9.34142	0.477357	72600000	72605000	Less activity	23.7081	23.7947	0.990714	-0.0866092	0.473965	0.534854	0.999051	0.999267	0.998902	0.9989	0.9992	1	-0.00373049	22.5875	17.4684	0.135516	0.368917	13.9504	15.3321	0.526908	-0.135327
Higher RPS in Berkshire	2	72391648	ENSSSCG00000013553	VAV1	16.4904	15.1887	0.014741	1.30178	Active	8.53199	9.34142	0.477357	72605000	72610000	Less activity	22.3602	26.2339	0.265613	-3.87369	0.517139	0.762239	0.999051	0.999267	0.998902	0.99805	0.9983	1	-0.00364167	22.5875	17.4684	0.135516	0.368917	10.9535	8.7837	0.420473	0.31527
Higher RPS in Berkshire	2	72394263	ENSSSCG00000022380	SH2D3A	16.4904	15.1887	0.014741	1.30178	Active	-	-	-	72280000	72285000	Less activity	53.921	16.3256	0.187143	37.5954	0.913106	0.709237	0.999051	0.999267	0.998902	1	1	1	-0.00165238	22.5875	17.4684	0.135516	0.368917	0.062731	1.11878	0.0897652	-2.90488
Higher RPS in Berkshire	2	72394263	ENSSSCG00000022380	SH2D3A	16.4904	15.1887	0.014741	1.30178	Active	-	-	-	72480000	72485000	Less activity	21.9917	19.561	0.702804	2.43067	0.696362	0.527805	0.999051	0.999267	0.998902	0.99875	0.9995	0.9998	0.000108824	22.5875	17.4684	0.135516	0.368917	17.7139	17.1137	0.895812	0.0494462
Higher RPS in Berkshire	2	72394263	ENSSSCG00000022380	SH2D3A	16.4904	15.1887	0.014741	1.30178	Active	-	-	-	72485000	72490000	Less activity	22.0077	20.9394	0.872171	1.06833	0.692357	0.564722	0.999051	0.999267	0.998902	0.9991	0.999867	1	9.72222e-05	22.5875	17.4684	0.135516	0.368917	16.8337	17.5372	0.255719	-0.05872
Higher RPS in Berkshire	2	72394263	ENSSSCG00000022380	SH2D3A	16.4904	15.1887	0.014741	1.30178	Active	-	-	-	72490000	72495000	Less activity	36.4191	22.5192	0.141563	13.8999	0.603138	0.208537	0.999051	0.999267	0.998902	0.9991	0.999867	1	9.21053e-05	22.5875	17.4684	0.135516	0.368917	6.19729	7.74184	0.0201922	-0.316461
Higher RPS in Berkshire	2	72394263	ENSSSCG00000022380	SH2D3A	16.4904	15.1887	0.014741	1.30178	Active	-	-	-	72495000	72500000	Less activity	27.3943	34.2872	0.278236	-6.89283	0.449186	0.555946	0.999051	0.999267	0.998902	0.99885	0.999233	1	8.75e-05	22.5875	17.4684	0.135516	0.368917	3.70421	4.35341	0.696489	-0.227313
Higher RPS in Berkshire	2	72394263	ENSSSCG00000022380	SH2D3A	16.4904	15.1887	0.014741	1.30178	Active	-	-	-	72505000	72510000	Less activity	23.8648	14.6329	0.434874	9.23187	0.781702	0.648072	0.999051	0.999267	0.998902	0.99945	0.9995	1	9.31818e-05	22.5875	17.4684	0.135516	0.368917	6.22228	5.17289	0.338352	0.261851
Higher RPS in Berkshire	2	72394263	ENSSSCG00000022380	SH2D3A	16.4904	15.1887	0.014741	1.30178	Active	-	-	-	72510000	72515000	Less activity	15.4403	13.1614	0.631414	2.27892	0.716326	0.708654	0.999051	0.999267	0.998902	0.9972	0.999333	0.999867	8.91304e-05	22.5875	17.4684	0.135516	0.368917	18.8918	13.1636	0.0731379	0.517898
Higher RPS in Berkshire	2	72394263	ENSSSCG00000022380	SH2D3A	16.4904	15.1887	0.014741	1.30178	Active	-	-	-	72575000	72580000	Less activity	18.0482	17.6428	0.941704	0.405409	0.643098	0.5383	0.999051	0.999267	0.998902	0.9983	0.9988	0.9998	-0.00398333	22.5875	17.4684	0.135516	0.368917	10.7714	9.40502	0.621821	0.193783
Higher RPS in Berkshire	2	72394263	ENSSSCG00000022380	SH2D3A	16.4904	15.1887	0.014741	1.30178	Active	-	-	-	72585000	72590000	Less activity	34.9913	33.3803	0.821622	1.61098	0.517464	0.720916	0.999051	0.999267	0.998902	0.996062	0.997409	0.9999	-0.00378553	22.5875	17.4684	0.135516	0.368917	13.6965	13.744	0.984918	-0.0049541
Higher RPS in Berkshire	2	72394263	ENSSSCG00000022380	SH2D3A	16.4904	15.1887	0.014741	1.30178	Active	-	-	-	72590000	72595000	Less activity	30.0961	29.185	0.897708	0.911117	0.331805	0.521729	0.999051	0.999267	0.998902	0.990836	0.99396	1	-0.00375	22.5875	17.4684	0.135516	0.368917	9.29439	11.994	0.0127824	-0.364419
Higher RPS in Berkshire	2	72394263	ENSSSCG00000022380	SH2D3A	16.4904	15.1887	0.014741	1.30178	Active	-	-	-	72600000	72605000	Less activity	23.7081	23.7947	0.990714	-0.0866092	0.529513	0.236997	0.999051	0.999267	0.998902	0.9989	0.9992	1	-0.00373049	22.5875	17.4684	0.135516	0.368917	13.9504	15.3321	0.526908	-0.135327
Higher RPS in Berkshire	2	72394263	ENSSSCG00000022380	SH2D3A	16.4904	15.1887	0.014741	1.30178	Active	-	-	-	72605000	72610000	Less activity	22.3602	26.2339	0.265613	-3.87369	0.401535	0.560559	0.999051	0.999267	0.998902	0.99805	0.9983	1	-0.00364167	22.5875	17.4684	0.135516	0.368917	10.9535	8.7837	0.420473	0.31527
Higher RPS in Berkshire	2	73969862	ENSSSCG00000038954	PLIN3	5.78716	4.19014	0.0316437	1.59703	Active	43.6868	49.42	0.469211	73390000	73395000	High activity	45.0116	0	0.211364	45.0116	0.626022	0.206545	0.998475	0.997434	0.9998	1	1	1	0.00323246	8.76592	8.58827	0.479228	0.0292014	0	0.125404	0.391002	-
Higher RPS in Berkshire	2	73969862	ENSSSCG00000038954	PLIN3	5.78716	4.19014	0.0316437	1.59703	Active	43.6868	49.42	0.469211	73840000	73845000	Less activity	27.0836	20.5531	0.423957	6.53051	0.470215	0.33423	0.998475	0.997434	0.9998	0.9985	0.9991	0.9991	0.000504167	8.76592	8.58827	0.479228	0.0292014	8.89316	12.4305	0.0160406	-0.478539
Higher RPS in Berkshire	2	73969862	ENSSSCG00000038954	PLIN3	5.78716	4.19014	0.0316437	1.59703	Active	43.6868	49.42	0.469211	73845000	73850000	Less activity	23.1186	15.6011	0.0247076	7.51748	0.519031	0.378383	0.998475	0.997434	0.9998	0.996328	0.996271	0.997867	0.000567391	8.76592	8.58827	0.479228	0.0292014	14.8456	14.1373	0.662251	0.070038
Higher RPS in Berkshire	2	73969862	ENSSSCG00000038954	PLIN3	5.78716	4.19014	0.0316437	1.59703	Active	43.6868	49.42	0.469211	73930000	73935000	Less activity	54.2086	46.5239	0.396235	7.68463	0.424562	0.182613	0.998475	0.997434	0.9998	0.99955	0.999167	1	0.00239167	8.76592	8.58827	0.479228	0.0292014	2.48666	6.24769	0.347159	-1.29514
Higher RPS in Berkshire	2	76634264	ENSSSCG00000013446	SCAMP4	1.22775	0	0.0224999	1.22775	Active	10.2533	10.3178	0.498434	76920000	76925000	Less activity	25.1282	0	0.0956697	25.1282	0.15803	0.00937711	0.9968	0.9996	0.9996	0.9978	0.9988	1	0.000144737	175.483	168.822	0.0404003	0.0557917	45.7217	39.9963	0.18211	0.192563
Higher RPS in Berkshire	2	76634262	ENSSSCG00000038810	ADAT3	1.22775	0	0.0224999	1.22775	Active	1.09362	1.00688	0.520649	76920000	76925000	Less activity	25.1282	0	0.0956697	25.1282	0.337215	0.320725	0.9968	0.9996	0.9996	0.9978	0.9988	1	0.000144737	175.483	168.822	0.0404003	0.0557917	45.7217	39.9963	0.18211	0.192563
Higher RPS in Berkshire	2	76955815	ENSSSCG00000013434	PLK5	1.6163	1.28713	0.0139862	0.329169	Active	0.0238129	0.0238129	-	77040000	77045000	Less activity	40.9795	19.012	0.0152386	21.9675	0.0155498	0.284546	0.994299	0.994366	0.995734	0.99845	0.9987	0.999633	0.00569375	18.3332	11.1419	0.155033	0.713429	9.02267	10.3449	0.746258	-0.195273
Higher RPS in Berkshire	2	77087361	ENSSSCG00000024144	NDUFS7	11.9017	11.4969	0.00966737	0.404796	Active	81.6133	168.3	0.326567	77150000	77155000	Less activity	57.51	39.605	0.0573374	17.9051	0.631165	0.50058	0.997408	0.999269	0.997474	0.99805	0.997867	0.999367	0.000879167	197.388	205.968	0.307053	-0.0613555	22.5105	21.8543	0.782878	0.0424878
Higher RPS in Berkshire	2	77087361	ENSSSCG00000024144	NDUFS7	11.9017	11.4969	0.00966737	0.404796	Active	81.6133	168.3	0.326567	77155000	77160000	Less activity	46.9886	33.3179	0.222108	13.6707	0.678303	0.672497	0.997408	0.999269	0.997474	0.997751	0.997733	0.999101	0.000811538	197.388	205.968	0.307053	-0.0613555	17.1284	17.8275	0.809708	-0.057383
Higher RPS in Berkshire	2	77087361	ENSSSCG00000024144	NDUFS7	11.9017	11.4969	0.00966737	0.404796	Active	81.6133	168.3	0.326567	77165000	77170000	Less activity	39.1423	35.967	0.73049	3.17522	0.352473	0.163348	0.997408	0.999269	0.997474	0.998051	0.999267	0.9997	0.000736667	197.388	205.968	0.307053	-0.0613555	11.6936	11.5721	0.97159	0.0149342
Higher RPS in Berkshire	2	77087361	ENSSSCG00000024144	NDUFS7	11.9017	11.4969	0.00966737	0.404796	Active	81.6133	168.3	0.326567	77170000	77175000	Less activity	42.6011	37.5514	0.476962	5.04968	0.302244	0.375149	0.997408	0.999269	0.997474	0.99785	0.9987	0.9998	0.000671875	197.388	205.968	0.307053	-0.0613555	15.9378	18.9976	0.0346195	-0.251911
Higher RPS in Berkshire	2	77087361	ENSSSCG00000024144	NDUFS7	11.9017	11.4969	0.00966737	0.404796	Active	81.6133	168.3	0.326567	77180000	77185000	Less activity	82.6511	81.7643	0.9419	0.886756	0.384033	0.0893262	0.997408	0.999269	0.997474	0.99885	0.998567	1	0.000575	197.388	205.968	0.307053	-0.0613555	37.1788	35.2155	0.602718	0.0780514
Higher RPS in Berkshire	2	77087361	ENSSSCG00000024144	NDUFS7	11.9017	11.4969	0.00966737	0.404796	Active	81.6133	168.3	0.326567	77185000	77190000	Less activity	68.8759	61.8117	0.378011	7.06417	0.288813	0.568843	0.997408	0.999269	0.997474	0.996063	0.993763	0.9997	0.000544737	197.388	205.968	0.307053	-0.0613555	52.6427	54.5682	0.755841	-0.0517298
Higher RPS in Berkshire	2	77087361	ENSSSCG00000024144	NDUFS7	11.9017	11.4969	0.00966737	0.404796	Active	81.6133	168.3	0.326567	77190000	77195000	Less activity	32.1263	33.9682	0.774672	-1.84189	0.267559	0.698036	0.997408	0.999269	0.997474	0.99835	0.998267	0.9997	0.0005	197.388	205.968	0.307053	-0.0613555	145.404	149.883	0.615046	-0.0437416
Higher RPS in Berkshire	2	77356728	ENSSSCG00000027565	ARHGAP45	3.27561	1.37921	0.0224887	1.8964	Active	9.3187	7.36463	0.558564	77230000	77235000	Less activity	22.3995	3.01732	0.0774112	19.3822	0.368763	0.440349	0.99765	0.998733	0.999567	0.997656	0.997708	0.9994	0.02245	52.3816	51.1062	0.82259	0.0354939	19.1157	18.0638	0.672586	0.0812169
Higher RPS in Berkshire	2	77356728	ENSSSCG00000027565	ARHGAP45	3.27561	1.37921	0.0224887	1.8964	Active	9.3187	7.36463	0.558564	77235000	77240000	Less activity	22.1046	0.30631	0.0711554	21.7983	0.406584	0.539489	0.99765	0.998733	0.999567	0.9994	0.999033	0.9999	0.0234217	52.3816	51.1062	0.82259	0.0354939	11.207	13.9605	0.407996	-0.314431
Higher RPS in Berkshire	2	77356728	ENSSSCG00000027565	ARHGAP45	3.27561	1.37921	0.0224887	1.8964	Active	9.3187	7.36463	0.558564	77240000	77245000	Less activity	13.955	16.8394	0.746248	-2.88445	0.314943	0.416183	0.99765	0.998733	0.999567	0.997301	0.996568	0.999867	0.0244227	52.3816	51.1062	0.82259	0.0354939	18.407	19.9344	0.777777	-0.114407
Higher RPS in Berkshire	2	84320799	ENSSSCG00000014079	ANKRD31	12.1879	11.6995	0.0178993	0.488439	Active	2.36658	2.60644	0.475883	84370000	84375000	Moderate activity	23.9349	23.7817	0.989276	0.153202	0.893497	0.966979	0.995445	0.998002	0.993369	0.991919	0.996309	0.995675	-0.000627778	30.1457	35.0476	0.547029	-0.216697	54.0998	34.1056	0.373234	0.664057
Higher RPS in Berkshire	2	84320799	ENSSSCG00000014079	ANKRD31	12.1879	11.6995	0.0178993	0.488439	Active	2.36658	2.60644	0.475883	84375000	84380000	Moderate activity	32.8812	35.3475	0.751382	-2.4663	0.931334	0.744739	0.995445	0.998002	0.993369	0.992766	0.996741	0.997837	-0.000765	30.1457	35.0476	0.547029	-0.216697	55.2033	54.8818	0.916906	0.00841143
Higher RPS in Berkshire	2	84320799	ENSSSCG00000014079	ANKRD31	12.1879	11.6995	0.0178993	0.488439	Active	2.36658	2.60644	0.475883	84385000	84390000	Moderate activity	32.8999	30.4251	0.836615	2.47471	0.810575	0.760694	0.995445	0.998002	0.993369	0.973899	0.998533	0.965993	-0.000895833	30.1457	35.0476	0.547029	-0.216697	13.4683	12.2869	0.717198	0.13142
Higher RPS in Berkshire	2	84320799	ENSSSCG00000014079	ANKRD31	12.1879	11.6995	0.0178993	0.488439	Active	2.36658	2.60644	0.475883	84390000	84395000	Less activity	27.6323	35.2354	0.166702	-7.60308	0.8542	0.533462	0.995445	0.998002	0.993369	0.995605	0.996569	0.996574	0.00106154	30.1457	35.0476	0.547029	-0.216697	18.4757	14.5701	0.303197	0.340533
Higher RPS in Berkshire	2	84320799	ENSSSCG00000014079	ANKRD31	12.1879	11.6995	0.0178993	0.488439	Active	2.36658	2.60644	0.475883	84395000	84400000	Less activity	32.2093	23.0065	0.268469	9.20288	0.919948	0.907956	0.995445	0.998002	0.993369	0.989904	0.999263	0.9957	0.00101429	30.1457	35.0476	0.547029	-0.216697	16.3825	15.6533	0.69702	0.0652805
Higher RPS in Berkshire	2	84320799	ENSSSCG00000014079	ANKRD31	12.1879	11.6995	0.0178993	0.488439	Active	2.36658	2.60644	0.475883	84400000	84405000	Moderate activity	52.6338	38.3402	0.21213	14.2936	0.976497	0.737313	0.995445	0.998002	0.993369	0.991887	0.993406	0.994841	0.00113667	30.1457	35.0476	0.547029	-0.216697	17.0362	15.7407	0.0714619	0.113408
Higher RPS in Berkshire	2	84320799	ENSSSCG00000014079	ANKRD31	12.1879	11.6995	0.0178993	0.488439	Active	2.36658	2.60644	0.475883	84405000	84410000	Moderate activity	43.6236	30.1771	0.224264	13.4465	0.935772	0.677951	0.995445	0.998002	0.993369	0.98847	0.992446	0.99694	0.00119063	30.1457	35.0476	0.547029	-0.216697	22.3271	23.7993	0.470545	-0.0917284
Higher RPS in Berkshire	2	84320799	ENSSSCG00000014079	ANKRD31	12.1879	11.6995	0.0178993	0.488439	Active	2.36658	2.60644	0.475883	84410000	84415000	Less activity	28.0468	27.1383	0.877557	0.908444	0.965217	0.708502	0.995445	0.998002	0.993369	0.995658	0.996804	0.997738	0.00143235	30.1457	35.0476	0.547029	-0.216697	13.7478	12.938	0.700688	0.086936
Higher RPS in Berkshire	2	134660927	ENSSSCG00000014280	RAD50	5.68097	4.77283	0.0349817	0.908137	Active	53.8266	56.9673	0.485826	134785000	134790000	Less activity	25.1399	22.3608	0.446873	2.77913	0.519712	0.241853	0.9965	0.996434	0.9989	0.996653	0.995905	1	0.00628542	263.485	246.14	0.320064	0.0982028	128.134	128.207	0.991703	-0.00081571
Higher RPS in Berkshire	2	134660927	ENSSSCG00000014280	RAD50	5.68097	4.77283	0.0349817	0.908137	Active	53.8266	56.9673	0.485826	134790000	134795000	Less activity	33.097	19.7379	0.0164593	13.3591	0.676199	0.770803	0.9965	0.996434	0.9989	0.993754	0.995903	1	0.006022	263.485	246.14	0.320064	0.0982028	152.086	172.651	0.141303	-0.182864
Higher RPS in Berkshire	2	134660927	ENSSSCG00000014280	RAD50	5.68097	4.77283	0.0349817	0.908137	Active	53.8266	56.9673	0.485826	134795000	134800000	Less activity	24.1939	23.7529	0.919275	0.441019	0.796295	0.749776	0.9965	0.996434	0.9989	0.993512	0.995338	0.9998	0.00577885	263.485	246.14	0.320064	0.0982028	26.6735	25.1518	0.689191	0.0844194
Higher RPS in Berkshire	2	134660927	ENSSSCG00000014280	RAD50	5.68097	4.77283	0.0349817	0.908137	Active	53.8266	56.9673	0.485826	134800000	134805000	Less activity	21.9219	6.33728	0.00125432	15.5846	0.942859	0.767056	0.9965	0.996434	0.9989	0.980833	0.969461	0.9999	0.00553148	263.485	246.14	0.320064	0.0982028	20.2468	19.3233	0.789807	0.0670191
Higher RPS in Berkshire	2	134783646	ENSSSCG00000014277	IRF1	23.2476	22.7061	0.0102159	0.541443	Active	25.9564	24.0699	0.518855	134665000	134670000	Less activity	20.1389	19.3175	0.909926	0.821447	0.823377	0.812984	0.996557	0.994782	1	0.9954	0.994268	0.996934	0.00686591	79.0934	85.4607	0.720945	-0.111567	30.6705	33.1615	0.586942	-0.112305
Higher RPS in Berkshire	2	134783646	ENSSSCG00000014277	IRF1	23.2476	22.7061	0.0102159	0.541443	Active	25.9564	24.0699	0.518855	134670000	134675000	Moderate activity	28.7417	26.6433	0.715794	2.09845	0.902606	0.940123	0.996557	0.994782	1	0.996151	0.99427	0.999433	0.00720476	79.0934	85.4607	0.720945	-0.111567	31.502	34.8745	0.384973	-0.146288
Higher RPS in Berkshire	2	134783646	ENSSSCG00000014277	IRF1	23.2476	22.7061	0.0102159	0.541443	Active	25.9564	24.0699	0.518855	134675000	134680000	Moderate activity	50.0882	47.197	0.693874	2.89118	0.969376	0.991155	0.996557	0.994782	1	0.99585	0.992935	0.999767	0.0075375	79.0934	85.4607	0.720945	-0.111567	54.8988	49.9159	0.0383821	0.137013
Higher RPS in Berkshire	2	134783646	ENSSSCG00000014277	IRF1	23.2476	22.7061	0.0102159	0.541443	Active	25.9564	24.0699	0.518855	134680000	134685000	Moderate activity	47.2173	46.5048	0.922602	0.712478	0.856448	0.986272	0.996557	0.994782	1	0.998176	0.997667	0.999067	0.00793421	79.0934	85.4607	0.720945	-0.111567	49.3003	40.7782	0.131366	0.273186
Higher RPS in Berkshire	2	134783646	ENSSSCG00000014277	IRF1	23.2476	22.7061	0.0102159	0.541443	Active	25.9564	24.0699	0.518855	134685000	134690000	Moderate activity	33.6928	30.0861	0.321452	3.60674	0.927172	0.997058	0.996557	0.994782	1	0.996551	0.996301	0.999167	0.00835833	79.0934	85.4607	0.720945	-0.111567	23.852	24.7904	0.810236	-0.0554418
Higher RPS in Berkshire	2	134783646	ENSSSCG00000014277	IRF1	23.2476	22.7061	0.0102159	0.541443	Active	25.9564	24.0699	0.518855	134690000	134695000	Less activity	36.8161	34.3798	0.793025	2.43627	0.863021	0.983476	0.996557	0.994782	1	0.9974	0.997666	1	0.00881765	79.0934	85.4607	0.720945	-0.111567	13.9007	14.7574	0.546138	-0.0856796
Higher RPS in Berkshire	2	134783646	ENSSSCG00000014277	IRF1	23.2476	22.7061	0.0102159	0.541443	Active	25.9564	24.0699	0.518855	134695000	134700000	Less activity	43.6217	35.7205	0.169231	7.90128	0.959426	0.994057	0.996557	0.994782	1	0.940705	0.890641	0.999867	0.00606875	79.0934	85.4607	0.720945	-0.111567	41.3729	32.2715	0.146877	0.357444
Higher RPS in Berkshire	2	134783646	ENSSSCG00000014277	IRF1	23.2476	22.7061	0.0102159	0.541443	Active	25.9564	24.0699	0.518855	134700000	134705000	High activity	50.4296	42.8363	0.200129	7.5933	0.73717	0.987299	0.996557	0.994782	1	0.996802	0.996003	0.998667	0.00649333	79.0934	85.4607	0.720945	-0.111567	111.068	124.304	0.282167	-0.162298
Higher RPS in Berkshire	2	134783646	ENSSSCG00000014277	IRF1	23.2476	22.7061	0.0102159	0.541443	Active	25.9564	24.0699	0.518855	134705000	134710000	High activity	72.1934	54.4314	0.183472	17.762	0.833604	0.970607	0.996557	0.994782	1	0.99885	0.999267	0.999	0.00696071	79.0934	85.4607	0.720945	-0.111567	27.2549	28.2468	0.838991	-0.0513879
Higher RPS in Berkshire	2	134783646	ENSSSCG00000014277	IRF1	23.2476	22.7061	0.0102159	0.541443	Active	25.9564	24.0699	0.518855	134710000	134715000	High activity	81.9382	75.6627	0.509046	6.27546	0.962092	0.9706	0.996557	0.994782	1	0.995304	0.995903	0.995836	0.00746923	79.0934	85.4607	0.720945	-0.111567	40.0096	47.9507	0.307731	-0.260609
Higher RPS in Berkshire	2	134783646	ENSSSCG00000014277	IRF1	23.2476	22.7061	0.0102159	0.541443	Active	25.9564	24.0699	0.518855	134715000	134720000	High activity	68.0624	76.3797	0.459036	-8.31726	0.930145	0.964441	0.996557	0.994782	1	0.996027	0.996169	0.997168	0.00811667	79.0934	85.4607	0.720945	-0.111567	80.9621	77.1425	0.585594	0.0696326
Higher RPS in Berkshire	2	134783646	ENSSSCG00000014277	IRF1	23.2476	22.7061	0.0102159	0.541443	Active	25.9564	24.0699	0.518855	134720000	134725000	High activity	68.6284	64.7364	0.707012	3.89202	0.992764	0.994361	0.996557	0.994782	1	0.993206	0.996002	0.995505	0.00891818	79.0934	85.4607	0.720945	-0.111567	64.0717	64.0067	0.967127	0.0014615
Higher RPS in Berkshire	2	134783646	ENSSSCG00000014277	IRF1	23.2476	22.7061	0.0102159	0.541443	Active	25.9564	24.0699	0.518855	134725000	134730000	High activity	50.5523	40.8112	0.0260329	9.7411	0.994374	0.984272	0.996557	0.994782	1	0.99483	0.995171	0.9996	0.009745	79.0934	85.4607	0.720945	-0.111567	29.0743	28.691	0.702186	0.0190826
Higher RPS in Berkshire	2	134783646	ENSSSCG00000014277	IRF1	23.2476	22.7061	0.0102159	0.541443	Active	25.9564	24.0699	0.518855	134730000	134735000	High activity	33.4775	30.3409	0.768842	3.13664	0.799643	0.995067	0.996557	0.994782	1	0.979281	0.961093	1	0.00908889	79.0934	85.4607	0.720945	-0.111567	29.9699	27.6298	0.239667	0.116884
Higher RPS in Berkshire	2	136299109	ENSSSCG00000032323	C5ORF15	7.43527	4.61565	0.0308458	2.81962	Active	42.9125	47.7395	0.473376	136265000	136270000	Less activity	14.2978	2.46118	0.316175	11.8366	0.70033	0.316922	0.998151	0.998334	0.999633	0.972646	0.983451	0.982479	-0.00998	78.6266	80.7683	0.754117	-0.0387222	28.6432	31.7792	0.271734	-0.149392
Higher RPS in Berkshire	2	136299109	ENSSSCG00000032323	C5ORF15	7.43527	4.61565	0.0308458	2.81962	Active	42.9125	47.7395	0.473376	136270000	136275000	Less activity	20.1413	7.89977	0.372443	12.2415	0.926997	0.678831	0.998151	0.998334	0.999633	0.981873	0.97735	0.993455	-0.011475	78.6266	80.7683	0.754117	-0.0387222	23.7971	22.4998	0.682664	0.0805302
Higher RPS in Berkshire	2	136299109	ENSSSCG00000032323	C5ORF15	7.43527	4.61565	0.0308458	2.81962	Active	42.9125	47.7395	0.473376	136320000	136325000	Less activity	47.4936	18.9612	0.0786544	28.5324	0.266679	0.306635	0.998151	0.998334	0.999633	0.983211	0.990318	0.994325	-0.003275	78.6266	80.7683	0.754117	-0.0387222	40.1069	47.2174	0.0195692	-0.234928
Higher RPS in Berkshire	2	136299109	ENSSSCG00000032323	C5ORF15	7.43527	4.61565	0.0308458	2.81962	Active	42.9125	47.7395	0.473376	136325000	136330000	Less activity	33.854	15.092	0.0738673	18.762	0.472376	0.487057	0.998151	0.998334	0.999633	0.970887	0.970886	0.992912	-0.00283	78.6266	80.7683	0.754117	-0.0387222	79.8184	72.4078	0.167613	0.140392
Higher RPS in Berkshire	2	136299109	ENSSSCG00000032323	C5ORF15	7.43527	4.61565	0.0308458	2.81962	Active	42.9125	47.7395	0.473376	136330000	136335000	Less activity	23.6197	13.9551	0.174092	9.66453	0.395503	0.406518	0.998151	0.998334	0.999633	0.994902	0.995304	0.996499	-0.00374167	78.6266	80.7683	0.754117	-0.0387222	57.9745	58.8331	0.752918	-0.0211721
Higher RPS in Berkshire	2	136299109	ENSSSCG00000032323	C5ORF15	7.43527	4.61565	0.0308458	2.81962	Active	42.9125	47.7395	0.473376	136335000	136340000	Less activity	19.9838	6.58968	0.0550458	13.3941	0.364714	0.449171	0.998151	0.998334	0.999633	0.957589	0.998067	0.973593	-0.00323571	78.6266	80.7683	0.754117	-0.0387222	35.8051	34.133	0.784554	0.0688046
Higher RPS in Berkshire	2	139944409	ENSSSCG00000035776	Unknown	1.34673	0.234155	0.0184058	1.11257	Inactive	0	0	-	139855000	139860000	Less activity	28.5158	1.91053	0.0414476	26.6053	0.55311	0.482791	0.997053	0.998701	0.998868	0.9971	0.9981	0.9988	-0.00116562	4.75422	7.83994	0.137002	-0.709887	18.1475	15.8755	0.309487	0.19184
Higher RPS in Berkshire	2	142989140	ENSSSCG00000025141	PCDHGB1	1.27586	0	0.00922515	1.27586	Active	0.526377	0.205305	0.719407	142810000	142815000	Less activity	24.9573	0	0.0928622	24.9573	0.519466	0.566567	0.985099	0.984231	0.998501	0.991384	0.98733	0.997143	0.00322794	44.6509	31.3466	0.0950162	0.509016	6.52775	4.10773	0.2558	0.655477
Higher RPS in Berkshire	2	143529961	ENSSSCG00000014396	DELE1	12.2187	11.624	0.0442998	0.594685	Active	11.7062	9.15097	0.561256	143305000	143310000	Less activity	22.293	27.2384	0.172402	-4.94542	0.596712	0.184567	0.978514	0.995042	0.9998	0.987772	0.988067	0.999867	0.0016686	290.212	344.175	0.0849392	-0.245958	40.6456	38.0791	0.175957	0.0938602
Higher RPS in Berkshire	2	143529961	ENSSSCG00000014396	DELE1	12.2187	11.624	0.0442998	0.594685	Active	11.7062	9.15097	0.561256	143310000	143315000	Less activity	16.9537	13.8612	0.662717	3.09253	0.255567	0.176498	0.978514	0.995042	0.9998	0.988364	0.990178	1	0.00173333	290.212	344.175	0.0849392	-0.245958	31.0022	37.8563	0.412537	-0.28732
Higher RPS in Berkshire	2	143529961	ENSSSCG00000014396	DELE1	12.2187	11.624	0.0442998	0.594685	Active	11.7062	9.15097	0.561256	143320000	143325000	Less activity	26.3144	24.7495	0.834257	1.56487	0.53349	0.367498	0.978514	0.995042	0.9998	0.992752	0.993536	0.999767	0.0018675	290.212	344.175	0.0849392	-0.245958	40.9577	40.1614	0.789359	0.0282546
Higher RPS in Berkshire	2	143529961	ENSSSCG00000014396	DELE1	12.2187	11.624	0.0442998	0.594685	Active	11.7062	9.15097	0.561256	143330000	143335000	Less activity	46.1312	50.8968	0.623986	-4.76562	0.797721	0.704313	0.978514	0.995042	0.9998	0.974927	0.981613	0.9999	0.000967105	290.212	344.175	0.0849392	-0.245958	39.8121	39.17	0.92796	0.0233986
Higher RPS in Berkshire	2	143529961	ENSSSCG00000014396	DELE1	12.2187	11.624	0.0442998	0.594685	Active	11.7062	9.15097	0.561256	143335000	143340000	Less activity	58.74	57.7902	0.952437	0.949849	0.817303	0.922992	0.978514	0.995042	0.9998	0.990165	0.991875	0.999467	0.0010027	290.212	344.175	0.0849392	-0.245958	54.2404	48.2826	0.307302	0.167536
Higher RPS in Berkshire	2	143529961	ENSSSCG00000014396	DELE1	12.2187	11.624	0.0442998	0.594685	Active	11.7062	9.15097	0.561256	143340000	143345000	Less activity	62.9997	41.228	0.204581	21.7717	0.890695	0.634452	0.978514	0.995042	0.9998	0.991389	0.992081	0.999034	0.00106389	290.212	344.175	0.0849392	-0.245958	28.8265	30.9597	0.727248	-0.102655
Higher RPS in Berkshire	2	143529961	ENSSSCG00000014396	DELE1	12.2187	11.624	0.0442998	0.594685	Active	11.7062	9.15097	0.561256	143345000	143350000	Less activity	34.3666	23.7631	0.158824	10.6035	0.799917	0.636768	0.978514	0.995042	0.9998	0.991221	0.99448	0.997035	0.00115286	290.212	344.175	0.0849392	-0.245958	31.2871	34.129	0.458786	-0.125046
Higher RPS in Berkshire	2	143529961	ENSSSCG00000014396	DELE1	12.2187	11.624	0.0442998	0.594685	Active	11.7062	9.15097	0.561256	143350000	143355000	Less activity	30.3965	21.8784	0.0926224	8.51809	0.90643	0.51174	0.978514	0.995042	0.9998	0.984675	0.988708	0.992482	0.00118088	290.212	344.175	0.0849392	-0.245958	35.7015	30.091	0.0398067	0.2459
Higher RPS in Berkshire	2	143565033	ENSSSCG00000014395	PCDH12	13.8712	13.5556	0.014215	0.31562	Active	6.17071	6.23824	0.497279	143310000	143315000	Less activity	25.5394	24.2817	0.868982	1.2577	0.502028	0.411879	0.991462	0.989452	0.998801	0.988364	0.990178	1	0.002825	29.712	29.2701	0.704707	0.021545	31.0022	37.8563	0.412537	-0.28732
Higher RPS in Berkshire	2	143565033	ENSSSCG00000014395	PCDH12	13.8712	13.5556	0.014215	0.31562	Active	6.17071	6.23824	0.497279	143315000	143320000	Less activity	28.4461	30.4014	0.837974	-1.95529	0.894504	0.69496	0.991462	0.989452	0.998801	0.983871	0.993358	0.999867	0.00294592	29.712	29.2701	0.704707	0.021545	31.0006	43.2775	0.0763243	-0.480004
Higher RPS in Berkshire	2	143565033	ENSSSCG00000014395	PCDH12	13.8712	13.5556	0.014215	0.31562	Active	6.17071	6.23824	0.497279	143320000	143325000	Less activity	28.2177	25.5533	0.315908	2.66433	0.978428	0.708926	0.991462	0.989452	0.998801	0.992752	0.993536	0.999767	0.00298229	29.712	29.2701	0.704707	0.021545	40.9577	40.1614	0.789359	0.0282546
Higher RPS in Berkshire	2	143565033	ENSSSCG00000014395	PCDH12	13.8712	13.5556	0.014215	0.31562	Active	6.17071	6.23824	0.497279	143330000	143335000	Less activity	54.2836	55.6974	0.837459	-1.41379	0.713168	0.595276	0.991462	0.989452	0.998801	0.974927	0.981613	0.9999	0.00228696	29.712	29.2701	0.704707	0.021545	39.8121	39.17	0.92796	0.0233986
Higher RPS in Berkshire	2	143565033	ENSSSCG00000014395	PCDH12	13.8712	13.5556	0.014215	0.31562	Active	6.17071	6.23824	0.497279	143335000	143340000	Less activity	65.1888	66.8408	0.914682	-1.65201	0.76574	0.693642	0.991462	0.989452	0.998801	0.990165	0.991875	0.999467	0.00234556	29.712	29.2701	0.704707	0.021545	54.2404	48.2826	0.307302	0.167536
Higher RPS in Berkshire	2	143565033	ENSSSCG00000014395	PCDH12	13.8712	13.5556	0.014215	0.31562	Active	6.17071	6.23824	0.497279	143340000	143345000	Less activity	50.5639	52.6665	0.769512	-2.10265	0.965988	0.72813	0.991462	0.989452	0.998801	0.991389	0.992081	0.999034	0.00242614	29.712	29.2701	0.704707	0.021545	28.8265	30.9597	0.727248	-0.102655
Higher RPS in Berkshire	2	143565033	ENSSSCG00000014395	PCDH12	13.8712	13.5556	0.014215	0.31562	Active	6.17071	6.23824	0.497279	143345000	143350000	Less activity	39.0619	43.6885	0.302595	-4.62657	0.917863	0.694989	0.991462	0.989452	0.998801	0.991221	0.99448	0.997035	0.00253023	29.712	29.2701	0.704707	0.021545	31.2871	34.129	0.458786	-0.125046
Higher RPS in Berkshire	2	143565033	ENSSSCG00000014395	PCDH12	13.8712	13.5556	0.014215	0.31562	Active	6.17071	6.23824	0.497279	143350000	143355000	Less activity	25.7331	23.9928	0.757016	1.74032	0.846789	0.698033	0.991462	0.989452	0.998801	0.984675	0.988708	0.992482	0.00258571	29.712	29.2701	0.704707	0.021545	35.7015	30.091	0.0398067	0.2459
Higher RPS in Berkshire	2	143565033	ENSSSCG00000014395	PCDH12	13.8712	13.5556	0.014215	0.31562	Active	6.17071	6.23824	0.497279	143365000	143370000	Less activity	19.6272	9.13372	0.114417	10.4934	0.842272	0.726087	0.991462	0.989452	0.998801	0.99405	0.995867	0.9999	0.00279103	29.712	29.2701	0.704707	0.021545	29.7903	29.1808	0.839301	0.0297199
Higher RPS in Berkshire	2	146869720	ENSSSCG00000045989	Unknown	1.19768	0.295902	0.0173917	0.901779	Inactive	-	-	-	146645000	146650000	Less activity	17.0977	1.78334	0.0433064	15.3143	0	0	0.990192	0.986311	0.997806	0.995452	0.994205	0.996436	-0.00138605	5.83004	4.86181	0.432013	0.257176	6.88148	7.42008	0.822522	-0.107214
Higher RPS in Berkshire	2	148519678	ENSSSCG00000014418	STK32A	13.3054	12.3965	0.0475222	0.908944	Inactive	0.0298016	0.0298016	-	148605000	148610000	Less activity	9.92744	18.2113	0.0403136	-8.28384	0.845931	0.915176	0.991533	0.994242	0.992904	0.983515	0.993898	0.981099	-0.00129412	29.2203	28.946	0.961299	0.0135591	22.9689	22.9474	0.994057	0.00134834
Higher RPS in Berkshire	2	148519678	ENSSSCG00000014418	STK32A	13.3054	12.3965	0.0475222	0.908944	Inactive	0.0298016	0.0298016	-	148630000	148635000	Less activity	21.9603	14.7652	0.416295	7.19518	0.895461	0.805308	0.991533	0.994242	0.992904	0.993338	0.992645	0.99325	0.000588636	29.2203	28.946	0.961299	0.0135591	24.7302	21.5872	0.266209	0.195257
Higher RPS in Berkshire	2	148519678	ENSSSCG00000014418	STK32A	13.3054	12.3965	0.0475222	0.908944	Inactive	0.0298016	0.0298016	-	148635000	148640000	Less activity	40.7013	27.7244	0.269225	12.9769	0.980351	0.94548	0.991533	0.994242	0.992904	0.990384	0.991822	0.988049	0.000571739	29.2203	28.946	0.961299	0.0135591	20.4692	17.3103	0.428966	0.24054
Higher RPS in Berkshire	2	148519678	ENSSSCG00000014418	STK32A	13.3054	12.3965	0.0475222	0.908944	Inactive	0.0298016	0.0298016	-	148640000	148645000	Less activity	57.3391	31.8902	0.0475955	25.449	0.982445	0.975545	0.991533	0.994242	0.992904	0.993262	0.993451	0.993035	0.000604167	29.2203	28.946	0.961299	0.0135591	11.0663	9.99175	0.748721	0.145978
Higher RPS in Berkshire	2	148519678	ENSSSCG00000014418	STK32A	13.3054	12.3965	0.0475222	0.908944	Inactive	0.0298016	0.0298016	-	148645000	148650000	Less activity	57.7768	39.7563	0.274659	18.0205	0.986021	0.937568	0.991533	0.994242	0.992904	0.98891	0.98857	0.990459	0.000534	29.2203	28.946	0.961299	0.0135591	28.6058	29.6146	0.818313	-0.049831
Higher RPS in Berkshire	2	148519678	ENSSSCG00000014418	STK32A	13.3054	12.3965	0.0475222	0.908944	Inactive	0.0298016	0.0298016	-	148650000	148655000	Less activity	37.6848	24.4425	0.236395	13.2423	0.996875	0.917544	0.991533	0.994242	0.992904	0.965645	0.971791	0.968375	0.000530769	29.2203	28.946	0.961299	0.0135591	32.2318	28.9923	0.475733	0.152317
Higher RPS in Berkshire	2	148519678	ENSSSCG00000014418	STK32A	13.3054	12.3965	0.0475222	0.908944	Inactive	0.0298016	0.0298016	-	148655000	148660000	Less activity	28.0321	29.8473	0.829489	-1.81524	0.871968	0.929916	0.991533	0.994242	0.992904	0.988782	0.991111	0.989543	0.000292593	29.2203	28.946	0.961299	0.0135591	33.5506	35.1841	0.575103	-0.068386
Higher RPS in Berkshire	2	148519678	ENSSSCG00000014418	STK32A	13.3054	12.3965	0.0475222	0.908944	Inactive	0.0298016	0.0298016	-	148660000	148665000	Less activity	40.9066	59.6216	0.127343	-18.7151	0.990816	0.740764	0.991533	0.994242	0.992904	0.991449	0.990332	0.992408	0.000241071	29.2203	28.946	0.961299	0.0135591	22.1152	22.0208	0.975632	0.00614357
Higher RPS in Berkshire	2	148519678	ENSSSCG00000014418	STK32A	13.3054	12.3965	0.0475222	0.908944	Inactive	0.0298016	0.0298016	-	148665000	148670000	Less activity	38.7703	25.2609	0.160096	13.5094	0.915284	0.611855	0.991533	0.994242	0.992904	0.982691	0.978739	0.985762	0.000265517	29.2203	28.946	0.961299	0.0135591	38.7848	38.752	0.985961	0.00122024
Higher RPS in Berkshire	2	151489521	ENSSSCG00000032731	NDST1	2.57764	1.63117	0.0164078	0.946473	Active	10.9742	9.97669	0.523805	151630000	151635000	Less activity	23.5419	12.1239	0.200097	11.4179	0.45852	0.853939	0.980315	0.964705	0.999267	0.998325	0.9983	0.9992	0.00226786	62.618	42.5247	0.285	0.557189	28.9337	30.5185	0.261198	-0.0766751
Higher RPS in Berkshire	2	151489521	ENSSSCG00000032731	NDST1	2.57764	1.63117	0.0164078	0.946473	Active	10.9742	9.97669	0.523805	151665000	151670000	High activity	19.9737	5.70339	0.0307609	14.2703	0.305875	0.459534	0.980315	0.964705	0.999267	0.996394	0.997464	0.999868	0.000971429	62.618	42.5247	0.285	0.557189	35.1051	34.1542	0.844469	0.0395035
Higher RPS in Berkshire	14	348345	ENSSSCG00000035269	NXNL2	19.8092	18.0373	0.00504477	1.77196	Active	0.0445658	0.0445658	-	60000	65000	Less activity	21.9392	28.3679	0.150847	-6.42868	0.868051	0.588438	0.980306	0.985997	0.9997	0.990758	0.993291	0.997605	-0.00702857	104.909	77.3191	0.148458	0.439749	22.2863	19.5371	0.307445	0.189036
Higher RPS in Berkshire	14	348345	ENSSSCG00000035269	NXNL2	19.8092	18.0373	0.00504477	1.77196	Active	0.0445658	0.0445658	-	70000	75000	Less activity	29.3763	20.8083	0.246544	8.56804	0.877006	0.756151	0.980306	0.985997	0.9997	0.986765	0.988412	0.992331	-0.0067787	104.909	77.3191	0.148458	0.439749	23.6904	26.4279	0.0960556	-0.157131
Higher RPS in Berkshire	14	348345	ENSSSCG00000035269	NXNL2	19.8092	18.0373	0.00504477	1.77196	Active	0.0445658	0.0445658	-	85000	90000	Less activity	30.7576	27.411	0.623756	3.34662	0.917914	0.844004	0.980306	0.985997	0.9997	0.977174	0.984098	0.992171	-0.000634314	104.909	77.3191	0.148458	0.439749	25.1198	22.0828	0.365935	0.185117
Higher RPS in Berkshire	14	348345	ENSSSCG00000035269	NXNL2	19.8092	18.0373	0.00504477	1.77196	Active	0.0445658	0.0445658	-	90000	95000	Less activity	29.6087	26.1282	0.659304	3.4805	0.90295	0.915918	0.980306	0.985997	0.9997	0.949198	0.947223	0.979877	-0.000129	104.909	77.3191	0.148458	0.439749	20.4972	23.6745	0.685922	-0.20697
Higher RPS in Berkshire	14	348345	ENSSSCG00000035269	NXNL2	19.8092	18.0373	0.00504477	1.77196	Active	0.0445658	0.0445658	-	95000	100000	Less activity	58.2356	35.8899	0.084155	22.3457	0.983321	0.940443	0.980306	0.985997	0.9997	0.981796	0.979666	0.999593	-0.000267347	104.909	77.3191	0.148458	0.439749	22.1908	18.0775	0.446859	0.294294
Higher RPS in Berkshire	14	348345	ENSSSCG00000035269	NXNL2	19.8092	18.0373	0.00504477	1.77196	Active	0.0445658	0.0445658	-	100000	105000	Less activity	58.9015	49.4202	0.364535	9.48134	0.980218	0.972745	0.980306	0.985997	0.9997	0.98392	0.989474	0.999767	-0.00029375	104.909	77.3191	0.148458	0.439749	23.8522	23.9191	0.989699	-0.00402768
Higher RPS in Berkshire	14	348345	ENSSSCG00000035269	NXNL2	19.8092	18.0373	0.00504477	1.77196	Active	0.0445658	0.0445658	-	105000	110000	Less activity	66.7013	58.5737	0.253636	8.1276	0.971862	0.993815	0.980306	0.985997	0.9997	0.931581	0.995036	0.9997	-0.0015734	104.909	77.3191	0.148458	0.439749	24.077	21.6192	0.0919151	0.154667
Higher RPS in Berkshire	14	348345	ENSSSCG00000035269	NXNL2	19.8092	18.0373	0.00504477	1.77196	Active	0.0445658	0.0445658	-	110000	115000	Less activity	54.4712	57.8362	0.796941	-3.36504	0.907409	0.94784	0.980306	0.985997	0.9997	0.958053	0.94939	0.998146	-0.000854348	104.909	77.3191	0.148458	0.439749	25.9027	26.9956	0.437778	-0.0593985
Higher RPS in Berkshire	14	348345	ENSSSCG00000035269	NXNL2	19.8092	18.0373	0.00504477	1.77196	Active	0.0445658	0.0445658	-	115000	120000	Less activity	54.1018	41.7929	0.132054	12.3089	0.942726	0.93205	0.980306	0.985997	0.9997	0.98209	0.974787	0.998868	-0.00106556	104.909	77.3191	0.148458	0.439749	22.8389	22.6745	0.797229	0.0103784
Higher RPS in Berkshire	14	348345	ENSSSCG00000035269	NXNL2	19.8092	18.0373	0.00504477	1.77196	Active	0.0445658	0.0445658	-	120000	125000	Less activity	42.3661	32.356	0.209603	10.01	0.984823	0.854482	0.980306	0.985997	0.9997	0.954981	0.947228	0.96907	-0.00141477	104.909	77.3191	0.148458	0.439749	21.7986	20.4385	0.434847	0.0925111
Higher RPS in Berkshire	14	348345	ENSSSCG00000035269	NXNL2	19.8092	18.0373	0.00504477	1.77196	Active	0.0445658	0.0445658	-	125000	130000	Less activity	22.9165	28.3172	0.485009	-5.40063	0.766198	0.900837	0.980306	0.985997	0.9997	0.970372	0.979711	0.99829	-0.00100581	104.909	77.3191	0.148458	0.439749	34.0022	26.9673	0.319644	0.333313
Higher RPS in Berkshire	14	348345	ENSSSCG00000035269	NXNL2	19.8092	18.0373	0.00504477	1.77196	Active	0.0445658	0.0445658	-	135000	140000	Less activity	28.5871	13.9003	0.160078	14.6867	0.837209	0.805802	0.980306	0.985997	0.9997	0.924274	0.944258	0.994338	0.000785366	104.909	77.3191	0.148458	0.439749	20.8922	17.3958	0.252103	0.262846
Higher RPS in Berkshire	14	348345	ENSSSCG00000035269	NXNL2	19.8092	18.0373	0.00504477	1.77196	Active	0.0445658	0.0445658	-	6030000	6035000	Less activity	16.3166	0	0.18169	16.3166	0.8045	0.771437	0.980306	0.985997	0.9997	1	1	1	-0.00104261	104.909	77.3191	0.148458	0.439749	0.128804	0.879874	0.0580635	-
Higher RPS in Berkshire	14	10085190	ENSSSCG00000041442	Unknown	8.63178	8.12012	0.0445806	0.511664	Inactive	0.0478397	0.0478397	-	10230000	10235000	Moderate activity	21.3797	22.335	0.806475	-0.955368	0.806363	0.664918	0.957892	0.991698	0.95124	0.887246	0.909262	0.910538	-0.000689286	27.3303	26.5685	0.800578	0.0406324	28.9887	26.113	0.446555	0.150174
Higher RPS in Berkshire	14	10085190	ENSSSCG00000041442	Unknown	8.63178	8.12012	0.0445806	0.511664	Inactive	0.0478397	0.0478397	-	10235000	10240000	Less activity	31.8367	24.8996	0.49803	6.93711	0.803655	0.797873	0.957892	0.991698	0.95124	0.989215	0.991121	0.995011	-0.0043069	27.3303	26.5685	0.800578	0.0406324	19.0753	16.2718	0.219997	0.228034
Higher RPS in Berkshire	14	10085190	ENSSSCG00000041442	Unknown	8.63178	8.12012	0.0445806	0.511664	Inactive	0.0478397	0.0478397	-	10240000	10245000	Less activity	33.6338	23.8066	0.23744	9.82724	0.615522	0.696819	0.957892	0.991698	0.95124	0.996751	0.9981	0.996467	-0.00401	27.3303	26.5685	0.800578	0.0406324	16.5406	15.3935	0.454755	0.103049
Higher RPS in Berkshire	14	10085190	ENSSSCG00000041442	Unknown	8.63178	8.12012	0.0445806	0.511664	Inactive	0.0478397	0.0478397	-	10245000	10250000	Less activity	30.4323	26.0231	0.698792	4.40922	0.978275	0.568978	0.957892	0.991698	0.95124	0.995497	0.997028	0.996502	-0.00388548	27.3303	26.5685	0.800578	0.0406324	12.708	15.6497	0.151583	-0.298281
Higher RPS in Berkshire	14	10085190	ENSSSCG00000041442	Unknown	8.63178	8.12012	0.0445806	0.511664	Inactive	0.0478397	0.0478397	-	10250000	10255000	Less activity	24.8787	19.2989	0.5684	5.57977	0.97201	0.561056	0.957892	0.991698	0.95124	0.996801	0.998833	0.996901	-0.00369219	27.3303	26.5685	0.800578	0.0406324	13.9923	16.6403	0.30804	-0.248417
Higher RPS in Berkshire	14	10085190	ENSSSCG00000041442	Unknown	8.63178	8.12012	0.0445806	0.511664	Inactive	0.0478397	0.0478397	-	10255000	10260000	Less activity	25.2849	19.781	0.229543	5.50388	0.626763	0.530685	0.957892	0.991698	0.95124	0.979244	0.969742	0.994832	-0.00359242	27.3303	26.5685	0.800578	0.0406324	8.81734	10.754	0.399131	-0.283535
Higher RPS in Berkshire	14	11216977	ENSSSCG00000009666	EPHX2	8.27515	7.95055	0.00494832	0.324598	Active	102.853	117.53	0.466702	11295000	11300000	Less activity	25.2698	17.7729	0.0451013	7.49694	0.120695	0.176477	0.988244	0.988117	0.998803	0.957399	0.946994	1	0.03862	375.91	365.096	0.782986	0.0420971	238.851	203.934	0.299586	0.227903
Higher RPS in Berkshire	14	11216977	ENSSSCG00000009666	EPHX2	8.27515	7.95055	0.00494832	0.324598	Active	102.853	117.53	0.466702	11305000	11310000	Less activity	28.1696	24.3405	0.4582	3.82916	0.103011	0.17359	0.988244	0.988117	0.998803	0.985718	0.982857	0.9999	0.0354294	375.91	365.096	0.782986	0.0420971	71.2257	58.5707	0.342008	0.28178
Higher RPS in Berkshire	14	11216977	ENSSSCG00000009666	EPHX2	8.27515	7.95055	0.00494832	0.324598	Active	102.853	117.53	0.466702	11310000	11315000	Less activity	22.9528	23.4082	0.921701	-0.455441	0.293679	0.34912	0.988244	0.988117	0.998803	0.942739	0.927004	0.999733	0.0339111	375.91	365.096	0.782986	0.0420971	49.3154	43.2598	0.403088	0.188605
Higher RPS in Berkshire	14	11216977	ENSSSCG00000009666	EPHX2	8.27515	7.95055	0.00494832	0.324598	Active	102.853	117.53	0.466702	11315000	11320000	Less activity	19.9142	20.1023	0.813948	-0.188079	0.0327998	0.213763	0.988244	0.988117	0.998803	0.987805	0.996064	0.996008	0.0344053	375.91	365.096	0.782986	0.0420971	85.2293	54.355	0.142629	0.647976
Higher RPS in Berkshire	14	11216977	ENSSSCG00000009666	EPHX2	8.27515	7.95055	0.00494832	0.324598	Active	102.853	117.53	0.466702	11330000	11335000	Moderate activity	25.6877	18.655	0.100255	7.03272	0.45805	0.616235	0.988244	0.988117	0.998803	0.974422	0.992814	0.996729	0.0300705	375.91	365.096	0.782986	0.0420971	57.3989	50.587	0.117679	0.181916
Higher RPS in Berkshire	14	11216977	ENSSSCG00000009666	EPHX2	8.27515	7.95055	0.00494832	0.324598	Active	102.853	117.53	0.466702	11335000	11340000	Moderate activity	19.5486	20.7284	0.773256	-1.17978	0.531145	0.0747194	0.988244	0.988117	0.998803	0.986268	0.995629	0.998426	0.0286826	375.91	365.096	0.782986	0.0420971	44.7833	40.5486	0.525377	0.142973
Higher RPS in Berkshire	14	14954836	ENSSSCG00000034740	Unknown	32.8637	28.1026	0.0106126	4.76109	Active	-	-	-	9875000	9880000	Less activity	17.1964	0	0.18169	17.1964	0.967632	0.980419	0.98955	0.993098	0.999533	0.952232	0.965345	0.9987	0.00101159	5.42714	3.83081	0.319955	0.491707	16.7407	15.3302	0.289174	0.126195
Higher RPS in Berkshire	14	14954836	ENSSSCG00000034740	Unknown	32.8637	28.1026	0.0106126	4.76109	Active	-	-	-	14485000	14490000	Less activity	17.1829	12.8708	0.835686	4.31217	0.993443	0.980408	0.98955	0.993098	0.999533	0.971176	0.997834	0.980538	0.00259946	5.42714	3.83081	0.319955	0.491707	20.0218	21.4297	0.463546	-0.0975654
Higher RPS in Berkshire	14	14954836	ENSSSCG00000034740	Unknown	32.8637	28.1026	0.0106126	4.76109	Active	-	-	-	14695000	14700000	Less activity	8.70698	18.3438	0.157728	-9.63684	0.804598	0.890795	0.98955	0.993098	0.999533	0.988851	0.986583	0.998033	-0.005944	5.42714	3.83081	0.319955	0.491707	26.3077	26.0431	0.883303	0.0145298
Higher RPS in Berkshire	14	14954836	ENSSSCG00000034740	Unknown	32.8637	28.1026	0.0106126	4.76109	Active	-	-	-	14715000	14720000	Less activity	10.3113	15.9372	0.183311	-5.62594	0.990451	0.998863	0.98955	0.993098	0.999533	0.99725	0.999033	0.996733	-0.00249674	5.42714	3.83081	0.319955	0.491707	9.31682	13.0794	0.213572	-0.484971
Higher RPS in Berkshire	14	14954836	ENSSSCG00000034740	Unknown	32.8637	28.1026	0.0106126	4.76109	Active	-	-	-	14725000	14730000	Less activity	13.1194	22.1226	0.620074	-9.00314	0.877216	0.971082	0.98955	0.993098	0.999533	0.94	0.992491	0.962064	-0.00148068	5.42714	3.83081	0.319955	0.491707	29.0809	29.873	0.410878	-0.0386428
Higher RPS in Berkshire	14	14954836	ENSSSCG00000034740	Unknown	32.8637	28.1026	0.0106126	4.76109	Active	-	-	-	14730000	14735000	Less activity	14.178	12.8404	0.909743	1.33765	0.761802	0.65599	0.98955	0.993098	0.999533	0.984614	0.992478	0.990514	-0.00156163	5.42714	3.83081	0.319955	0.491707	36.9926	34.0194	0.443292	0.12054
Higher RPS in Berkshire	14	14954836	ENSSSCG00000034740	Unknown	32.8637	28.1026	0.0106126	4.76109	Active	-	-	-	14735000	14740000	Less activity	33.3123	30.7642	0.868129	2.54803	0.95008	0.61171	0.98955	0.993098	0.999533	0.989611	0.993305	0.994939	-0.00161429	5.42714	3.83081	0.319955	0.491707	35.7826	39.3043	0.303227	-0.135067
Higher RPS in Berkshire	14	14954836	ENSSSCG00000034740	Unknown	32.8637	28.1026	0.0106126	4.76109	Active	-	-	-	14740000	14745000	Less activity	13.2716	14.0708	0.943929	-0.799248	0.862484	0.602668	0.98955	0.993098	0.999533	0.986234	0.989044	0.993948	-0.00162195	5.42714	3.83081	0.319955	0.491707	38.6556	37.0832	0.566596	0.0597519
Higher RPS in Berkshire	14	14954836	ENSSSCG00000034740	Unknown	32.8637	28.1026	0.0106126	4.76109	Active	-	-	-	14745000	14750000	Less activity	17.7126	15.2263	0.898295	2.48629	0.858185	0.630679	0.98955	0.993098	0.999533	0.993977	0.996678	0.993088	-0.0016475	5.42714	3.83081	0.319955	0.491707	25.0895	28.2581	0.290806	-0.170933
Higher RPS in Berkshire	14	14954836	ENSSSCG00000034740	Unknown	32.8637	28.1026	0.0106126	4.76109	Active	-	-	-	14750000	14755000	Moderate activity	23.2865	15.248	0.430295	8.0385	0.901237	0.777797	0.98955	0.993098	0.999533	0.985049	0.990277	0.993076	-0.00173333	5.42714	3.83081	0.319955	0.491707	52.9235	52.2833	0.842613	0.0175263
Higher RPS in Berkshire	14	14954836	ENSSSCG00000034740	Unknown	32.8637	28.1026	0.0106126	4.76109	Active	-	-	-	14755000	14760000	Moderate activity	28.5128	11.2317	0.142456	17.2811	0.911784	0.679521	0.98955	0.993098	0.999533	0.986651	0.995463	0.995133	-0.00179211	5.42714	3.83081	0.319955	0.491707	44.8948	44.2823	0.920977	0.0197747
Higher RPS in Berkshire	14	14954836	ENSSSCG00000034740	Unknown	32.8637	28.1026	0.0106126	4.76109	Active	-	-	-	14765000	14770000	Moderate activity	28.9551	16.5845	0.583982	12.3705	0.977557	0.672486	0.98955	0.993098	0.999533	0.983547	0.988222	0.992958	-0.00179028	5.42714	3.83081	0.319955	0.491707	50.3866	55.4868	0.141882	-0.138841
Higher RPS in Berkshire	14	14954836	ENSSSCG00000034740	Unknown	32.8637	28.1026	0.0106126	4.76109	Active	-	-	-	14785000	14790000	Moderate activity	9.18714	15.4443	0.679176	-6.25719	0.744412	0.863239	0.98955	0.993098	0.999533	0.958553	0.994472	0.956386	-0.00316719	5.42714	3.83081	0.319955	0.491707	38.9705	41.7237	0.251948	-0.0982428
Higher RPS in Berkshire	14	14954836	ENSSSCG00000034740	Unknown	32.8637	28.1026	0.0106126	4.76109	Active	-	-	-	15000000	15005000	Moderate activity	39.3324	11.0806	0.161971	28.2519	0.795131	0.58531	0.98955	0.993098	0.999533	0.994413	0.993885	0.996236	-0.000405556	5.42714	3.83081	0.319955	0.491707	25.8097	27.9594	0.300075	-0.114993
Higher RPS in Berkshire	14	14954836	ENSSSCG00000034740	Unknown	32.8637	28.1026	0.0106126	4.76109	Active	-	-	-	15005000	15010000	Moderate activity	36.1769	29.8376	0.836296	6.33922	0.96231	0.966736	0.98955	0.993098	0.999533	0.961142	0.961587	0.959663	-0.000425	5.42714	3.83081	0.319955	0.491707	57.3345	59.2498	0.62457	-0.0473255
Higher RPS in Berkshire	14	14954836	ENSSSCG00000034740	Unknown	32.8637	28.1026	0.0106126	4.76109	Active	-	-	-	15020000	15025000	Less activity	38.262	30.1269	0.707669	8.13512	0.843383	0.694173	0.98955	0.993098	0.999533	0.992581	0.992605	0.995112	0.000630769	5.42714	3.83081	0.319955	0.491707	102.307	104.212	0.685164	-0.0265982
Higher RPS in Berkshire	14	14954836	ENSSSCG00000034740	Unknown	32.8637	28.1026	0.0106126	4.76109	Active	-	-	-	15045000	15050000	High activity	15.1476	9.75544	0.678956	5.39211	0.742558	0.473639	0.98955	0.993098	0.999533	0.972238	0.995312	0.963808	0.000413889	5.42714	3.83081	0.319955	0.491707	139.405	140.083	0.908609	-0.00699018
Higher RPS in Berkshire	14	14954836	ENSSSCG00000034740	Unknown	32.8637	28.1026	0.0106126	4.76109	Active	-	-	-	15050000	15055000	High activity	4.66664	31.3799	0.0851866	-26.7133	0.78145	0.755901	0.98955	0.993098	0.999533	0.98817	0.992827	0.994219	0.000602632	5.42714	3.83081	0.319955	0.491707	71.6204	84.3868	0.140936	-0.236343
Higher RPS in Berkshire	14	14954836	ENSSSCG00000034740	Unknown	32.8637	28.1026	0.0106126	4.76109	Active	-	-	-	15055000	15060000	High activity	14.2315	20.1883	0.786827	-5.95682	0.925131	0.664313	0.98955	0.993098	0.999533	0.977323	0.985505	0.987444	0.0005625	5.42714	3.83081	0.319955	0.491707	55.2356	75.675	0.206111	-0.453514
Higher RPS in Berkshire	14	14954836	ENSSSCG00000034740	Unknown	32.8637	28.1026	0.0106126	4.76109	Active	-	-	-	15060000	15065000	Less activity	20.5929	3.09489	0.328157	17.498	0.907299	0.779229	0.98955	0.993098	0.999533	0.995428	0.996469	0.997601	0.000280952	5.42714	3.83081	0.319955	0.491707	108.851	129.833	0.262093	-0.254094
Higher RPS in Berkshire	14	14954836	ENSSSCG00000034740	Unknown	32.8637	28.1026	0.0106126	4.76109	Active	-	-	-	15065000	15070000	Less activity	33.1105	10.0828	0.144023	23.0277	0.990354	0.939365	0.98955	0.993098	0.999533	0.990102	0.993168	0.998967	0.000270455	5.42714	3.83081	0.319955	0.491707	53.9585	57.2919	0.694306	-0.0863276
Higher RPS in Berkshire	14	14954836	ENSSSCG00000034740	Unknown	32.8637	28.1026	0.0106126	4.76109	Active	-	-	-	15070000	15075000	Less activity	29.0471	20.8559	0.538777	8.19123	0.993025	0.989357	0.98955	0.993098	0.999533	0.992356	0.992378	0.9983	0.000367391	5.42714	3.83081	0.319955	0.491707	33.1084	44.127	0.203296	-0.413376
Higher RPS in Berkshire	14	14954836	ENSSSCG00000034740	Unknown	32.8637	28.1026	0.0106126	4.76109	Active	-	-	-	15075000	15080000	Less activity	66.0945	39.2777	0.449398	26.8168	0.995264	0.907524	0.98955	0.993098	0.999533	0.986901	0.992794	0.995936	0.000414583	5.42714	3.83081	0.319955	0.491707	65.4894	62.8045	0.345806	0.0602995
Higher RPS in Berkshire	14	14954836	ENSSSCG00000034740	Unknown	32.8637	28.1026	0.0106126	4.76109	Active	-	-	-	15080000	15085000	Less activity	78.1651	37.8458	0.175604	40.3193	0.919109	0.974148	0.98955	0.993098	0.999533	0.971204	0.967392	0.988434	0.00057	5.42714	3.83081	0.319955	0.491707	104.866	95.7472	0.25976	0.131118
Higher RPS in Berkshire	14	14954836	ENSSSCG00000034740	Unknown	32.8637	28.1026	0.0106126	4.76109	Active	-	-	-	15085000	15090000	Less activity	86.4654	27.649	0.258443	58.8165	0.978357	0.956282	0.98955	0.993098	0.999533	0.987927	0.993664	0.991035	0.000188462	5.42714	3.83081	0.319955	0.491707	26.0147	23.937	0.0415267	0.119605
Higher RPS in Berkshire	14	14954836	ENSSSCG00000034740	Unknown	32.8637	28.1026	0.0106126	4.76109	Active	-	-	-	15090000	15095000	Less activity	61.4448	41.2086	0.510504	20.2362	0.987775	0.981708	0.98955	0.993098	0.999533	0.986091	0.993768	0.990211	0.000198148	5.42714	3.83081	0.319955	0.491707	32.5267	30.7473	0.631593	0.0809099
Higher RPS in Berkshire	14	14954836	ENSSSCG00000034740	Unknown	32.8637	28.1026	0.0106126	4.76109	Active	-	-	-	15095000	15100000	Less activity	27.6816	9.57465	0.236608	18.1069	0.977092	0.929281	0.98955	0.993098	0.999533	0.977849	0.992474	0.991235	7.67857e-05	5.42714	3.83081	0.319955	0.491707	44.01	42.2328	0.640095	0.0593332
Higher RPS in Berkshire	14	14954836	ENSSSCG00000034740	Unknown	32.8637	28.1026	0.0106126	4.76109	Active	-	-	-	15100000	15105000	Less activity	16.4757	23.6924	0.635721	-7.21666	0.948371	0.649975	0.98955	0.993098	0.999533	0.950173	0.956239	0.995531	0.000113793	5.42714	3.83081	0.319955	0.491707	34.3921	38.1814	0.234409	-0.150375
Higher RPS in Berkshire	14	14954836	ENSSSCG00000034740	Unknown	32.8637	28.1026	0.0106126	4.76109	Active	-	-	-	15115000	15120000	Less activity	15.7159	12.9868	0.811277	2.72917	0.994545	0.92674	0.98955	0.993098	0.999533	0.988947	0.9982	0.993315	-0.00110625	5.42714	3.83081	0.319955	0.491707	23.8	21.2819	0.34515	0.160619
Higher RPS in Berkshire	14	14954836	ENSSSCG00000034740	Unknown	32.8637	28.1026	0.0106126	4.76109	Active	-	-	-	15130000	15135000	Less activity	16.0687	6.9695	0.26278	9.09922	0.991428	0.987796	0.98955	0.993098	0.999533	0.978134	0.9887	0.971677	-0.00103857	5.42714	3.83081	0.319955	0.491707	18.096	14.6358	0.0432406	0.304298
Higher RPS in Berkshire	14	14954836	ENSSSCG00000034740	Unknown	32.8637	28.1026	0.0106126	4.76109	Active	-	-	-	15135000	15140000	Less activity	2.17047	16.8688	0.247408	-14.6983	0.971731	0.946554	0.98955	0.993098	0.999533	0.989348	0.987396	0.997534	-0.0013625	5.42714	3.83081	0.319955	0.491707	20.7406	21.118	0.930409	-0.0258913
Higher RPS in Berkshire	14	26611566	ENSSSCG00000009753	TMEM132C	7.25886	6.17085	0.0180806	1.08802	Active	3.08497	1.7008	0.644613	26490000	26495000	Less activity	26.4738	11.6442	0.0690855	14.8297	0.933562	0.633654	0.989521	0.99451	0.995487	0.9864	0.987371	0.9998	0.00235	78.1311	74.729	0.230736	0.0641448	23.8868	18.733	0.140655	0.348984
Higher RPS in Berkshire	14	26611566	ENSSSCG00000009753	TMEM132C	7.25886	6.17085	0.0180806	1.08802	Active	3.08497	1.7008	0.644613	26495000	26500000	Less activity	20.8659	18.8327	0.712236	2.03321	0.649683	0.585076	0.989521	0.99451	0.995487	0.991857	0.993772	1	0.00242273	78.1311	74.729	0.230736	0.0641448	14.5229	16.231	0.278013	-0.159386
Higher RPS in Berkshire	14	26611566	ENSSSCG00000009753	TMEM132C	7.25886	6.17085	0.0180806	1.08802	Active	3.08497	1.7008	0.644613	26500000	26505000	Less activity	38.054	27.0121	0.333752	11.0419	0.716927	0.57662	0.989521	0.99451	0.995487	0.9993	0.999467	1	0.0025381	78.1311	74.729	0.230736	0.0641448	3.39268	3.55961	0.78159	-0.0673554
Higher RPS in Berkshire	14	26611566	ENSSSCG00000009753	TMEM132C	7.25886	6.17085	0.0180806	1.08802	Active	3.08497	1.7008	0.644613	26505000	26510000	Less activity	36.8668	22.9024	0.184711	13.9644	0.686775	0.455752	0.989521	0.99451	0.995487	0.998155	0.998603	0.999235	0.002635	78.1311	74.729	0.230736	0.0641448	6.8132	5.5352	0.564826	0.294886
Higher RPS in Berkshire	14	26611566	ENSSSCG00000009753	TMEM132C	7.25886	6.17085	0.0180806	1.08802	Active	3.08497	1.7008	0.644613	26510000	26515000	Less activity	23.0235	11.9836	0.300112	11.0398	0.720755	0.664974	0.989521	0.99451	0.995487	0.97622	0.974551	0.995754	0.00339474	78.1311	74.729	0.230736	0.0641448	13.9709	14.5904	0.722514	-0.0621562
Higher RPS in Berkshire	14	37655111	ENSSSCG00000009866	ZSCAN21	2.54355	1.17951	0.0127179	1.36404	Inactive	-	-	-	36440000	36445000	Less activity	26.6235	23.1775	0.88512	3.44596	0.807064	0.487366	0.963916	0.998348	1	0.99935	0.999033	1	0.0025781	11.5348	7.60864	0.0209349	0.593893	1.6481	3.6532	0.153352	-1.10234
Higher RPS in Berkshire	14	37655111	ENSSSCG00000009866	ZSCAN21	2.54355	1.17951	0.0127179	1.36404	Inactive	-	-	-	37630000	37635000	Less activity	27.5481	5.79424	0.0730964	21.7538	0.381784	0.501149	0.963916	0.998348	1	0.986477	0.98972	0.999733	0.0945625	11.5348	7.60864	0.0209349	0.593893	19.4017	22.4417	0.130498	-0.208998
Higher RPS in Berkshire	14	40223967	ENSSSCG00000036014	RPLP0	3.43349	3.08631	0.037708	0.347178	Active	2200.34	2608.15	0.457594	40270000	40275000	Less activity	37.1654	24.778	0.250305	12.3874	0.248561	0.317849	0.997775	0.997101	0.999433	0.9981	0.998666	0.998633	0.000533333	276.041	288.91	0.295373	-0.0657169	36.8653	38.3368	0.513162	-0.0563185
Higher RPS in Berkshire	14	40223967	ENSSSCG00000036014	RPLP0	3.43349	3.08631	0.037708	0.347178	Active	2200.34	2608.15	0.457594	40280000	40285000	Less activity	71.7366	50.543	0.0183931	21.1936	0.204141	0.176263	0.997775	0.997101	0.999433	0.975468	0.972534	0.985624	0.000490909	276.041	288.91	0.295373	-0.0657169	18.809	16.7799	0.572629	0.163759
Higher RPS in Berkshire	14	40322319	ENSSSCG00000029501	PLA2G1B	3.18945	2.73192	0.0294156	0.457533	Inactive	-	-	-	40395000	40400000	Less activity	32.1945	16.3548	0.0739166	15.8397	0.30628	0.332193	0.991657	0.988382	0.994667	0.998326	0.997435	0.9988	0.00155357	26.4911	31.0454	0.00519081	-0.228073	10.1652	10.2992	0.965401	-0.0187123
Higher RPS in Berkshire	14	40322319	ENSSSCG00000029501	PLA2G1B	3.18945	2.73192	0.0294156	0.457533	Inactive	-	-	-	40400000	40405000	Moderate activity	49.2884	32.0966	0.0149641	17.1918	0.259202	0.357287	0.991657	0.988382	0.994667	0.99895	0.998433	0.9992	0.00147667	26.4911	31.0454	0.00519081	-0.228073	8.08686	11.579	0.0710702	-0.512538
Higher RPS in Berkshire	14	47520187	ENSSSCG00000010012	SLC35E4	5.74056	5.05086	0.00395609	0.689706	Active	-	-	-	47920000	47925000	Less activity	22.7838	13.4764	0.311418	9.30737	0.437083	0.412453	0.9999	0.9999	0.9999	0.99945	0.999301	0.9996	0.000762658	0.232535	0.233703	0.391002	-	8.05653	6.38085	0.391002	0.331772
Higher RPS in Berkshire	14	47520187	ENSSSCG00000010012	SLC35E4	5.74056	5.05086	0.00395609	0.689706	Active	-	-	-	47930000	47935000	Less activity	24.1276	20.3873	0.595159	3.74036	0.220924	0.241742	0.9999	0.9999	0.9999	0.998993	0.998516	0.999894	0.000740741	0.232535	0.233703	0.391002	-	8.00374	5.92397	0.191012	0.427873
Higher RPS in Berkshire	14	47520187	ENSSSCG00000010012	SLC35E4	5.74056	5.05086	0.00395609	0.689706	Active	-	-	-	47935000	47940000	High activity	34.4614	23.197	0.0434588	11.2644	0.43667	0.390154	0.9999	0.9999	0.9999	0.999486	0.999125	0.999696	0.000731098	0.232535	0.233703	0.391002	-	2.43181	2.20953	0.392154	0.13257
Higher RPS in Berkshire	14	47520187	ENSSSCG00000010012	SLC35E4	5.74056	5.05086	0.00395609	0.689706	Active	-	-	-	47940000	47945000	High activity	31.93	18.0641	0.183638	13.8659	0.253237	0.410069	0.9999	0.9999	0.9999	0.998503	0.998004	0.999002	0.000722289	0.232535	0.233703	0.391002	-	7.1087	8.11022	0.391002	-0.187683
Higher RPS in Berkshire	14	48858068	ENSSSCG00000025508	Unknown	1.41841	1.10364	0.0137856	0.314775	Inactive	0.0572269	0.0572269	-	48915000	48920000	Less activity	28.0339	12.0568	0.0576754	15.977	0.188915	0.494871	0.999001	0.999367	0.998701	0.99945	0.999	0.9999	0.00532727	6.44284	6.17708	0.77274	0.059823	4.26523	4.29365	0.391002	-0.00936393
Higher RPS in Berkshire	14	48867363	ENSSSCG00000033879	ZNF280B	1.51068	0.411606	0.0242398	1.09907	Inactive	3.78802	4.18675	0.475	49000000	49005000	Less activity	33.5418	3.45192	0.0239471	30.0899	0.00841613	0.828057	0.998628	0.99817	0.999002	0.9994	0.9998	0.999	0.00221923	4.41817	4.90777	0.391002	-0.14843	3.08045	2.6239	0.391002	0.223557
Higher RPS in Berkshire	14	51520421	ENSSSCG00000010139	CCDC188	12.6103	11.608	0.0270981	1.00226	Inactive	0.0142233	0.0142233	-	51585000	51590000	Moderate activity	32.0923	30.7439	0.932303	1.34844	0.391966	0.406643	0.9987	0.998767	0.9999	0.99865	0.998467	0.9997	0.000225	13.2103	14.1659	0.672627	-0.100023	10.7803	10.2045	0.576774	0.0784424
Higher RPS in Berkshire	14	51520421	ENSSSCG00000010139	CCDC188	12.6103	11.608	0.0270981	1.00226	Inactive	0.0142233	0.0142233	-	51590000	51595000	Moderate activity	37.3706	22.3606	0.223981	15.0099	0.804552	0.87535	0.9987	0.998767	0.9999	0.99855	0.998267	0.9997	0.000230769	13.2103	14.1659	0.672627	-0.100023	14.6236	12.0633	0.350687	0.275592
Higher RPS in Berkshire	14	51520421	ENSSSCG00000010139	CCDC188	12.6103	11.608	0.0270981	1.00226	Inactive	0.0142233	0.0142233	-	51595000	51600000	Moderate activity	47.359	36.0644	0.456526	11.2946	0.575233	0.695568	0.9987	0.998767	0.9999	0.997529	0.996904	0.999301	0.000210714	13.2103	14.1659	0.672627	-0.100023	15.7325	19.1352	0.300835	-0.280856
Higher RPS in Berkshire	14	51520421	ENSSSCG00000010139	CCDC188	12.6103	11.608	0.0270981	1.00226	Inactive	0.0142233	0.0142233	-	51605000	51610000	Less activity	54.9718	80.307	0.00867912	-25.3351	0.619172	0.51334	0.9987	0.998767	0.9999	0.99905	0.998533	0.9997	0.000159375	13.2103	14.1659	0.672627	-0.100023	5.908	6.8078	0.369957	-0.201341
Higher RPS in Berkshire	14	51520421	ENSSSCG00000010139	CCDC188	12.6103	11.608	0.0270981	1.00226	Inactive	0.0142233	0.0142233	-	51610000	51615000	Less activity	67.1855	99.4248	0.187581	-32.2392	0.201599	0.649799	0.9987	0.998767	0.9999	0.999	0.998867	0.9993	0.00015	13.2103	14.1659	0.672627	-0.100023	10.111	11.8857	0.254272	-0.231191
Higher RPS in Berkshire	14	51520421	ENSSSCG00000010139	CCDC188	12.6103	11.608	0.0270981	1.00226	Inactive	0.0142233	0.0142233	-	51615000	51620000	Less activity	87.0892	81.2755	0.774163	5.81373	0.532191	0.651373	0.9987	0.998767	0.9999	0.997952	0.997137	0.9996	0.000144444	13.2103	14.1659	0.672627	-0.100023	33.0181	47.264	0.213871	-0.516174
Higher RPS in Berkshire	14	51520421	ENSSSCG00000010139	CCDC188	12.6103	11.608	0.0270981	1.00226	Inactive	0.0142233	0.0142233	-	51650000	51655000	Less activity	18.9032	5.33874	0.0185417	13.5644	0.0563051	0.0480387	0.9987	0.998767	0.9999	0.9992	0.998533	0.9999	0.000116	13.2103	14.1659	0.672627	-0.100023	4.51081	4.91718	0.580557	-0.121855
Higher RPS in Berkshire	14	51520421	ENSSSCG00000010139	CCDC188	12.6103	11.608	0.0270981	1.00226	Inactive	0.0142233	0.0142233	-	51660000	51665000	Less activity	21.5744	8.23645	0.135313	13.338	0.338169	0.528131	0.9987	0.998767	0.9999	0.997829	0.996042	0.999767	0.000138889	13.2103	14.1659	0.672627	-0.100023	10.325	12.3462	0.238397	-0.255652
Higher RPS in Berkshire	14	66291306	ENSSSCG00000010224	EGR2	10.9003	10.1198	0.032908	0.780438	Active	0.100962	0.100962	-	66095000	66100000	Less activity	16.48	13.6362	0.677891	2.84382	0.806924	0.673244	0.997624	0.998787	0.999494	0.9993	1	0.999867	-0.00203684	106.761	115.103	0.378981	-0.108435	2.17995	0.980178	0.435688	1.07774
Higher RPS in Berkshire	14	66291306	ENSSSCG00000010224	EGR2	10.9003	10.1198	0.032908	0.780438	Active	0.100962	0.100962	-	66100000	66105000	Less activity	30.5481	17.9691	0.159708	12.579	0.8913	0.565365	0.997624	0.998787	0.999494	0.99945	0.9998	0.9999	-0.00209189	106.761	115.103	0.378981	-0.108435	2.64635	4.24447	0.109822	-0.661663
Higher RPS in Berkshire	14	66291306	ENSSSCG00000010224	EGR2	10.9003	10.1198	0.032908	0.780438	Active	0.100962	0.100962	-	66105000	66110000	Less activity	36.5328	31.9417	0.620512	4.59109	0.658906	0.767749	0.997624	0.998787	0.999494	0.997352	0.9999	0.999867	-0.00211111	106.761	115.103	0.378981	-0.108435	3.28566	3.3623	0.931258	-0.0322947
Higher RPS in Berkshire	14	66291306	ENSSSCG00000010224	EGR2	10.9003	10.1198	0.032908	0.780438	Active	0.100962	0.100962	-	66110000	66115000	Less activity	32.8074	32.1458	0.936845	0.661592	0.722003	0.728082	0.997624	0.998787	0.999494	0.99795	1	0.999367	-0.00217429	106.761	115.103	0.378981	-0.108435	13.0395	13.747	0.864809	-0.0756606
Higher RPS in Berkshire	14	66291306	ENSSSCG00000010224	EGR2	10.9003	10.1198	0.032908	0.780438	Active	0.100962	0.100962	-	66115000	66120000	Less activity	28.4213	23.8929	0.54829	4.52843	0.781091	0.94267	0.997624	0.998787	0.999494	0.996051	0.9999	0.9994	-0.00224412	106.761	115.103	0.378981	-0.108435	19.3057	21.5189	0.688096	-0.155807
Higher RPS in Berkshire	14	66291306	ENSSSCG00000010224	EGR2	10.9003	10.1198	0.032908	0.780438	Active	0.100962	0.100962	-	66120000	66125000	Less activity	13.7803	18.8294	0.466383	-5.04907	0.716684	0.785476	0.997624	0.998787	0.999494	0.993501	0.9999	0.998831	-0.00222727	106.761	115.103	0.378981	-0.108435	24.0185	23.1975	0.863643	0.0499666
Higher RPS in Berkshire	14	66291306	ENSSSCG00000010224	EGR2	10.9003	10.1198	0.032908	0.780438	Active	0.100962	0.100962	-	66125000	66130000	Less activity	18.0907	20.3141	0.689217	-2.22337	0.726976	0.69795	0.997624	0.998787	0.999494	0.993107	0.9997	0.999699	-0.00224844	106.761	115.103	0.378981	-0.108435	20.4387	16.5604	0.110423	0.301923
Higher RPS in Berkshire	14	66291306	ENSSSCG00000010224	EGR2	10.9003	10.1198	0.032908	0.780438	Active	0.100962	0.100962	-	66130000	66135000	Less activity	22.104	8.76949	0.050102	13.3345	0.845871	0.985271	0.997624	0.998787	0.999494	0.995601	0.9999	0.999232	-0.00226935	106.761	115.103	0.378981	-0.108435	12.5403	15.0039	0.446678	-0.256887
Higher RPS in Berkshire	14	73723800	ENSSSCG00000010274	SGPL1	14.0975	13.1936	0.00708892	0.903954	Active	36.0461	37.6861	0.488878	73765000	73770000	Moderate activity	39.6896	40.7739	0.905731	-1.08433	0.98246	0.764501	0.995453	0.994571	0.999267	0.9944	0.998534	0.994398	-0.0099125	91.5645	77.9527	0.291759	0.231913	32.1493	30.2059	0.368065	0.0896727
Higher RPS in Berkshire	14	73723800	ENSSSCG00000010274	SGPL1	14.0975	13.1936	0.00708892	0.903954	Active	36.0461	37.6861	0.488878	73770000	73775000	Moderate activity	39.7385	37.3253	0.61717	2.41323	0.940875	0.875757	0.995453	0.994571	0.999267	0.992524	0.99203	0.997937	-0.00884444	91.5645	77.9527	0.291759	0.231913	21.7319	25.5978	0.0480079	-0.235206
Higher RPS in Berkshire	14	73723800	ENSSSCG00000010274	SGPL1	14.0975	13.1936	0.00708892	0.903954	Active	36.0461	37.6861	0.488878	73775000	73780000	Moderate activity	57.7832	35.9363	0.202581	21.8469	0.864963	0.430182	0.995453	0.994571	0.999267	0.997502	0.996371	0.999633	-0.007935	91.5645	77.9527	0.291759	0.231913	16.1638	18.0181	0.407177	-0.15577
Higher RPS in Berkshire	14	73723800	ENSSSCG00000010274	SGPL1	14.0975	13.1936	0.00708892	0.903954	Active	36.0461	37.6861	0.488878	73780000	73785000	Moderate activity	43.8635	39.6818	0.640692	4.1817	0.945285	0.940048	0.995453	0.994571	0.999267	0.992186	0.988315	0.9997	-0.00719091	91.5645	77.9527	0.291759	0.231913	7.7858	8.51825	0.715781	-0.128139
Higher RPS in Berkshire	14	73723800	ENSSSCG00000010274	SGPL1	14.0975	13.1936	0.00708892	0.903954	Active	36.0461	37.6861	0.488878	73785000	73790000	Moderate activity	39.3274	21.72	0.00110545	17.6074	0.961902	0.653828	0.995453	0.994571	0.999267	0.990817	0.988722	0.9987	-0.00703333	91.5645	77.9527	0.291759	0.231913	22.1711	21.4471	0.678736	0.0476795
Higher RPS in Berkshire	14	73723800	ENSSSCG00000010274	SGPL1	14.0975	13.1936	0.00708892	0.903954	Active	36.0461	37.6861	0.488878	73790000	73795000	Moderate activity	34.2958	29.0608	0.3806	5.23499	0.936288	0.904853	0.995453	0.994571	0.999267	0.945531	0.918979	0.999633	-0.00643077	91.5645	77.9527	0.291759	0.231913	16.5034	17.8387	0.434182	-0.111594
Higher RPS in Berkshire	14	73723800	ENSSSCG00000010274	SGPL1	14.0975	13.1936	0.00708892	0.903954	Active	36.0461	37.6861	0.488878	73795000	73800000	Moderate activity	29.562	31.1742	0.77652	-1.61223	0.892653	0.93423	0.995453	0.994571	0.999267	0.993264	0.99162	0.999567	-0.00477857	91.5645	77.9527	0.291759	0.231913	22.412	24.8727	0.26019	-0.149655
Higher RPS in Berkshire	14	73723800	ENSSSCG00000010274	SGPL1	14.0975	13.1936	0.00708892	0.903954	Active	36.0461	37.6861	0.488878	73800000	73805000	Less activity	36.4095	22.3568	0.173505	14.0527	0.741018	0.568649	0.995453	0.994571	0.999267	0.995408	0.993447	0.999367	-0.00448667	91.5645	77.9527	0.291759	0.231913	102.343	103.184	0.925659	-0.0117922
Higher RPS in Berkshire	14	73723800	ENSSSCG00000010274	SGPL1	14.0975	13.1936	0.00708892	0.903954	Active	36.0461	37.6861	0.488878	73810000	73815000	Less activity	19.7242	15.7884	0.371575	3.93574	0.846556	0.86684	0.995453	0.994571	0.999267	0.98912	0.995941	0.997434	-0.00389118	91.5645	77.9527	0.291759	0.231913	27.4559	27.3335	0.970106	0.00642124
Higher RPS in Berkshire	14	106736151	ENSSSCG00000051054	L1TD1	16.9624	13.8865	0.0095069	3.07581	Active	1.20108	1.83599	0.395474	105990000	105995000	Less activity	22.8642	16.1096	0.352094	6.75455	0.60248	0.77587	0.990818	0.988262	0.992817	0.99715	0.9987	0.9996	0.0136541	34.5415	32.9248	0.757967	0.0689504	7.78685	6.28316	0.412739	0.305179
Higher RPS in Berkshire	14	106736151	ENSSSCG00000051054	L1TD1	16.9624	13.8865	0.0095069	3.07581	Active	1.20108	1.83599	0.395474	105995000	106000000	Less activity	35.2739	16.1508	0.136316	19.1232	0.516372	0.585392	0.990818	0.988262	0.992817	0.997502	0.998968	0.9994	0.0137517	34.5415	32.9248	0.757967	0.0689504	8.75924	11.8737	0.0484743	-0.434615
Higher RPS in Berkshire	14	106736151	ENSSSCG00000051054	L1TD1	16.9624	13.8865	0.0095069	3.07581	Active	1.20108	1.83599	0.395474	106000000	106005000	Less activity	33.818	24.9805	0.403416	8.83748	0.517708	0.470437	0.990818	0.988262	0.992817	0.99835	0.999867	0.9999	0.0138466	34.5415	32.9248	0.757967	0.0689504	20.6693	14.1513	0.292491	0.543358
Higher RPS in Berkshire	14	106736151	ENSSSCG00000051054	L1TD1	16.9624	13.8865	0.0095069	3.07581	Active	1.20108	1.83599	0.395474	106005000	106010000	Less activity	27.9936	15.1624	0.0631916	12.8312	0.696475	0.401114	0.990818	0.988262	0.992817	0.995901	0.996999	0.9998	0.013941	34.5415	32.9248	0.757967	0.0689504	20.6434	15.2407	0.299223	0.435285
Higher RPS in Berkshire	14	106736151	ENSSSCG00000051054	L1TD1	16.9624	13.8865	0.0095069	3.07581	Active	1.20108	1.83599	0.395474	106815000	106820000	Less activity	40.2091	0	0.0145831	40.2091	0.130518	0.288311	0.990818	0.988262	0.992817	0.984833	0.975421	0.993608	0.00158333	34.5415	32.9248	0.757967	0.0689504	6.98799	7.63126	0.490604	-0.125328
Higher RPS in Berkshire	14	106736151	ENSSSCG00000051054	L1TD1	16.9624	13.8865	0.0095069	3.07581	Active	1.20108	1.83599	0.395474	106820000	106825000	Less activity	23.0972	6.5652	0.11471	16.532	0.721259	0.539877	0.990818	0.988262	0.992817	0.910929	0.927913	0.92317	0.00209688	34.5415	32.9248	0.757967	0.0689504	16.869	13.3018	0.422515	0.340472
Higher RPS in Berkshire	14	106736151	ENSSSCG00000051054	L1TD1	16.9624	13.8865	0.0095069	3.07581	Active	1.20108	1.83599	0.395474	106825000	106830000	Less activity	21.6502	16.512	0.363661	5.1382	0.718444	0.452255	0.990818	0.988262	0.992817	0.987966	0.986885	0.991542	0.00595	34.5415	32.9248	0.757967	0.0689504	24.8237	24.1395	0.812849	0.0401598
Higher RPS in Berkshire	14	106736151	ENSSSCG00000051054	L1TD1	16.9624	13.8865	0.0095069	3.07581	Active	1.20108	1.83599	0.395474	106830000	106835000	Moderate activity	19.2635	26.8437	0.130005	-7.5802	0.484329	0.362967	0.990818	0.988262	0.992817	0.944412	0.93821	0.998734	0.0057	34.5415	32.9248	0.757967	0.0689504	30.6106	33.0249	0.629866	-0.109178
Higher RPS in Berkshire	14	106736151	ENSSSCG00000051054	L1TD1	16.9624	13.8865	0.0095069	3.07581	Active	1.20108	1.83599	0.395474	106835000	106840000	Less activity	32.5693	34.0372	0.828702	-1.46785	0.674624	0.50218	0.990818	0.988262	0.992817	0.981214	0.971716	0.998426	0.00723421	34.5415	32.9248	0.757967	0.0689504	23.9678	24.2728	0.688133	-0.0181677
Higher RPS in Berkshire	14	106736151	ENSSSCG00000051054	L1TD1	16.9624	13.8865	0.0095069	3.07581	Active	1.20108	1.83599	0.395474	106840000	106845000	Less activity	33.3278	33.1675	0.978532	0.16028	0.621752	0.404504	0.990818	0.988262	0.992817	0.988045	0.991435	0.996589	0.007575	34.5415	32.9248	0.757967	0.0689504	28.6679	26.7719	0.368354	0.0983603
Higher RPS in Berkshire	14	106736151	ENSSSCG00000051054	L1TD1	16.9624	13.8865	0.0095069	3.07581	Active	1.20108	1.83599	0.395474	106845000	106850000	Less activity	16.0591	26.1937	0.288497	-10.1346	0.774781	0.425687	0.990818	0.988262	0.992817	0.983702	0.987249	0.998132	0.00710952	34.5415	32.9248	0.757967	0.0689504	24.5059	23.0043	0.684481	0.0908458
Higher RPS in Berkshire	14	106736151	ENSSSCG00000051054	L1TD1	16.9624	13.8865	0.0095069	3.07581	Active	1.20108	1.83599	0.395474	106940000	106945000	Moderate activity	17.9232	20.9686	0.327025	-3.04544	0.311948	0.167972	0.990818	0.988262	0.992817	0.988742	0.994308	0.998502	0.0041075	34.5415	32.9248	0.757967	0.0689504	65.4241	60.8678	0.500054	0.103979
Higher RPS in Berkshire	14	107961155	ENSSSCG00000010507	TLL2	5.49662	4.87181	0.0363899	0.624812	Active	0.660699	2.12389	0.23727	107820000	107825000	Less activity	25.2788	20.079	0.428827	5.19973	0.735798	0.904424	0.995663	0.996976	1	0.990226	0.996608	1	0.000633333	58.7245	69.3305	0.233256	-0.239153	26.116	27.8962	0.477755	-0.0947849
Higher RPS in Berkshire	14	107961155	ENSSSCG00000010507	TLL2	5.49662	4.87181	0.0363899	0.624812	Active	0.660699	2.12389	0.23727	107830000	107835000	Less activity	26.0923	15.9623	0.295033	10.13	0.399415	0.578988	0.995663	0.996976	1	0.990903	0.994337	0.9998	0.000776	58.7245	69.3305	0.233256	-0.239153	26.8823	23.3209	0.52511	0.204215
Higher RPS in Berkshire	14	107961155	ENSSSCG00000010507	TLL2	5.49662	4.87181	0.0363899	0.624812	Active	0.660699	2.12389	0.23727	107835000	107840000	Less activity	23.3137	12.5268	0.23355	10.7868	0.629957	0.928796	0.995663	0.996976	1	0.994356	0.992179	0.9998	0.000804167	58.7245	69.3305	0.233256	-0.239153	21.4379	20.8895	0.853529	0.0372115
Higher RPS in Berkshire	14	107961155	ENSSSCG00000010507	TLL2	5.49662	4.87181	0.0363899	0.624812	Active	0.660699	2.12389	0.23727	107840000	107845000	Less activity	22.5282	24.1464	0.796114	-1.6182	0.451001	0.94791	0.995663	0.996976	1	0.985359	0.990171	0.9997	0.000495652	58.7245	69.3305	0.233256	-0.239153	23.6296	26.4855	0.380269	-0.163956
Higher RPS in Berkshire	14	120963791	ENSSSCG00000036552	ATP5F1B	13.9609	13.5835	0.00244043	0.377342	Inactive	0.0180198	0.0180198	-	120730000	120735000	Less activity	26.5161	22.4403	0.497702	4.07575	0.685709	0.961769	0.982021	0.997134	0.999265	0.9994	0.9994	0.9996	0.00184667	33.4617	32.986	0.883104	0.0205971	2.37544	1.56396	0.547211	0.573063
Higher RPS in Berkshire	14	120963791	ENSSSCG00000036552	ATP5F1B	13.9609	13.5835	0.00244043	0.377342	Inactive	0.0180198	0.0180198	-	120740000	120745000	Less activity	69.7223	55.5295	0.274977	14.1928	0.650744	0.663557	0.982021	0.997134	0.999265	0.997901	0.998701	0.9996	0.00193372	33.4617	32.986	0.883104	0.0205971	42.6451	47.0759	0.182621	-0.142292
Higher RPS in Berkshire	14	120963791	ENSSSCG00000036552	ATP5F1B	13.9609	13.5835	0.00244043	0.377342	Inactive	0.0180198	0.0180198	-	120745000	120750000	Less activity	52.4397	56.1504	0.324999	-3.7107	0.733801	0.791672	0.982021	0.997134	0.999265	0.955217	0.970207	0.9996	0.00300357	33.4617	32.986	0.883104	0.0205971	13.4478	13.2601	0.862561	0.0201256
Higher RPS in Berkshire	14	120963791	ENSSSCG00000036552	ATP5F1B	13.9609	13.5835	0.00244043	0.377342	Inactive	0.0180198	0.0180198	-	120750000	120755000	Less activity	41.6201	43.4969	0.596745	-1.87678	0.837435	0.782871	0.982021	0.997134	0.999265	0.9992	0.9997	0.9989	0.00308537	33.4617	32.986	0.883104	0.0205971	1.97423	2.36731	0.195708	-0.250363
Higher RPS in Berkshire	14	120963791	ENSSSCG00000036552	ATP5F1B	13.9609	13.5835	0.00244043	0.377342	Inactive	0.0180198	0.0180198	-	120755000	120760000	Less activity	38.4026	33.0411	0.334611	5.36153	0.813956	0.809047	0.982021	0.997134	0.999265	0.9992	0.999267	0.9996	0.0031625	33.4617	32.986	0.883104	0.0205971	6.56564	7.48335	0.477229	-0.186092
Higher RPS in Berkshire	14	120963791	ENSSSCG00000036552	ATP5F1B	13.9609	13.5835	0.00244043	0.377342	Inactive	0.0180198	0.0180198	-	120760000	120765000	Less activity	34.4335	20.9304	0.0467134	13.5031	0.853255	0.937106	0.982021	0.997134	0.999265	0.999101	0.9996	0.999334	0.00324231	33.4617	32.986	0.883104	0.0205971	4.00206	4.71298	0.541524	-0.230581
Higher RPS in Berkshire	14	120963791	ENSSSCG00000036552	ATP5F1B	13.9609	13.5835	0.00244043	0.377342	Inactive	0.0180198	0.0180198	-	120765000	120770000	Less activity	27.484	25.2766	0.573937	2.20744	0.889325	0.81527	0.982021	0.997134	0.999265	0.9997	0.9996	1	0.00332763	33.4617	32.986	0.883104	0.0205971	1.87078	2.0263	0.661277	-0.109581
Higher RPS in Berkshire	14	120963791	ENSSSCG00000036552	ATP5F1B	13.9609	13.5835	0.00244043	0.377342	Inactive	0.0180198	0.0180198	-	120770000	120775000	Less activity	24.3757	29.5514	0.26308	-5.17563	0.82855	0.70857	0.982021	0.997134	0.999265	0.995299	0.99135	0.9999	0.00342973	33.4617	32.986	0.883104	0.0205971	5.80968	9.90537	0.263905	-0.759624
Higher RPS in Berkshire	14	120963791	ENSSSCG00000036552	ATP5F1B	13.9609	13.5835	0.00244043	0.377342	Inactive	0.0180198	0.0180198	-	120775000	120780000	Less activity	22.0962	21.2454	0.672916	0.850804	0.649255	0.842113	0.982021	0.997134	0.999265	0.996551	0.996968	1	0.00351944	33.4617	32.986	0.883104	0.0205971	15.7966	17.2433	0.687945	-0.125661
Higher RPS in Berkshire	14	140635965	ENSSSCG00000023681	PWWP2B	1.53302	1.22761	0.037532	0.305414	Active	0.493297	0.442486	-	140685000	140690000	Moderate activity	34.4167	16.8788	0.0362536	17.5379	0.490941	0.416427	0.998275	0.9983	0.999167	0.976909	0.994896	0.985594	-0.00190556	36.3564	36.3909	0.996354	-0.00136463	39.6335	44.9281	0.169233	-0.180469
Higher RPS in Berkshire	15	23676683	ENSSSCG00000036229	INSIG2	4.28529	2.74954	0.00997755	1.53574	Active	61.092	39.4744	0.607479	23610000	23615000	Less activity	21.7502	8.25564	0.110749	13.4945	0.450777	0.512762	0.993842	0.993223	0.995815	0.9943	0.995467	0.9986	-0.0045875	191.544	184.697	0.68507	0.0524817	26.2181	27.543	0.674384	-0.0708603
Higher RPS in Berkshire	15	23676683	ENSSSCG00000036229	INSIG2	4.28529	2.74954	0.00997755	1.53574	Active	61.092	39.4744	0.607479	23615000	23620000	Less activity	24.2261	13.8737	0.014473	10.3523	0.715671	0.488433	0.993842	0.993223	0.995815	0.995801	0.995402	0.996801	-0.00509091	191.544	184.697	0.68507	0.0524817	12.7197	12.5094	0.906826	0.0238648
Higher RPS in Berkshire	15	23676683	ENSSSCG00000036229	INSIG2	4.28529	2.74954	0.00997755	1.53574	Active	61.092	39.4744	0.607479	23650000	23655000	High activity	39.3458	10.7186	0.0575697	28.6272	0.447627	0.893856	0.993842	0.993223	0.995815	0.927431	0.96506	0.967871	-0.0292625	191.544	184.697	0.68507	0.0524817	72.6939	62.911	0.120511	0.208214
Higher RPS in Berkshire	15	44989421	ENSSSCG00000015776	RWDD4	4.30343	3.39728	0.00396612	0.906151	Active	27.8897	31.4126	0.470297	44880000	44885000	Less activity	20.2116	5.09311	0.0379751	15.1185	0.288115	0.135107	0.996903	0.996269	0.999534	0.998303	0.996974	0.999867	0.0074975	52.4892	45.4704	0.393924	0.206671	5.25179	2.88078	0.361184	0.844331
Higher RPS in Berkshire	15	44989421	ENSSSCG00000015776	RWDD4	4.30343	3.39728	0.00396612	0.906151	Active	27.8897	31.4126	0.470297	44890000	44895000	Less activity	30.9894	26.4711	0.519958	4.51833	0.460475	0.125217	0.996903	0.996269	0.999534	0.9961	0.997131	1	0.00822222	52.4892	45.4704	0.393924	0.206671	35.2631	48.9261	0.0636218	-0.471304
Higher RPS in Berkshire	15	44989421	ENSSSCG00000015776	RWDD4	4.30343	3.39728	0.00396612	0.906151	Active	27.8897	31.4126	0.470297	44895000	44900000	Less activity	32.0463	20.4561	0.236489	11.5901	0.807186	0.36063	0.996903	0.996269	0.999534	0.994053	0.991905	0.9999	0.00868529	52.4892	45.4704	0.393924	0.206671	21.155	30.227	0.0215428	-0.512801
Higher RPS in Berkshire	15	44989636	ENSSSCG00000015777	TRAPPC11	4.30343	3.39728	0.00396612	0.906151	Active	18.5574	18.6126	0.499258	44880000	44885000	Less activity	20.2116	5.09311	0.0379751	15.1185	0.270089	0.291557	0.996903	0.996269	0.999534	0.998303	0.996974	0.999867	0.0074975	52.4892	45.4704	0.393924	0.206671	5.25179	2.88078	0.361184	0.844331
Higher RPS in Berkshire	15	44989636	ENSSSCG00000015777	TRAPPC11	4.30343	3.39728	0.00396612	0.906151	Active	18.5574	18.6126	0.499258	44890000	44895000	Less activity	30.9894	26.4711	0.519958	4.51833	0.44561	0.109741	0.996903	0.996269	0.999534	0.9961	0.997131	1	0.00822222	52.4892	45.4704	0.393924	0.206671	35.2631	48.9261	0.0636218	-0.471304
Higher RPS in Berkshire	15	44989636	ENSSSCG00000015777	TRAPPC11	4.30343	3.39728	0.00396612	0.906151	Active	18.5574	18.6126	0.499258	44895000	44900000	Less activity	32.0463	20.4561	0.236489	11.5901	0.49632	0.519891	0.996903	0.996269	0.999534	0.994053	0.991905	0.9999	0.00868529	52.4892	45.4704	0.393924	0.206671	21.155	30.227	0.0215428	-0.512801
Higher RPS in Berkshire	15	61894984	ENSSSCG00000042602	Unknown	5.04855	2.72192	0.041531	2.32664	Inactive	0.0454996	0.0454996	-	61660000	61665000	Less activity	22.1026	16.8293	0.834017	5.27329	0	0	1	1	1	0.998651	1	0.9999	-0.0314	0.123557	0	0.391002	-	2.99205	3.82862	0.426577	-0.345462
Higher RPS in Berkshire	15	61894984	ENSSSCG00000042602	Unknown	5.04855	2.72192	0.041531	2.32664	Inactive	0.0454996	0.0454996	-	61690000	61695000	Less activity	7.614	6.98519	0.957267	0.628816	0	0	1	1	1	0.9991	0.999867	1	-0.0362821	0.123557	0	0.391002	-	4.7133	4.0058	0.361638	0.22936
Higher RPS in Berkshire	15	61894984	ENSSSCG00000042602	Unknown	5.04855	2.72192	0.041531	2.32664	Inactive	0.0454996	0.0454996	-	61925000	61930000	Less activity	35.1942	5.84765	0.0437606	29.3465	0	0	1	1	1	0.99635	1	0.9997	0.000183333	0.123557	0	0.391002	-	11.7627	13.384	0.57072	-0.184823
Higher RPS in Berkshire	15	61894984	ENSSSCG00000042602	Unknown	5.04855	2.72192	0.041531	2.32664	Inactive	0.0454996	0.0454996	-	61950000	61955000	Less activity	16.6496	2.39024	0.296185	14.2594	0	0	1	1	1	0.998461	0.999145	0.999743	0.000231818	0.123557	0	0.391002	-	2.73809	2.37468	0.403845	0.197677
Higher RPS in Berkshire	15	61894984	ENSSSCG00000042602	Unknown	5.04855	2.72192	0.041531	2.32664	Inactive	0.0454996	0.0454996	-	61955000	61960000	Less activity	21.8164	1.02546	0.0642327	20.7909	0	0	1	1	1	0.999258	0.999753	1	0.000229167	0.123557	0	0.391002	-	2.60426	1.76117	0.10702	0.539024
Higher RPS in Berkshire	15	61894984	ENSSSCG00000042602	Unknown	5.04855	2.72192	0.041531	2.32664	Inactive	0.0454996	0.0454996	-	62400000	62405000	Less activity	1.92886	11.4548	0.313631	-9.52593	0	0	1	1	1	0.995602	0.998933	1	0.00354059	0.123557	0	0.391002	-	14.3832	13.0401	0.415232	0.140403
Higher RPS in Berkshire	15	64892153	ENSSSCG00000015874	ACVR1	19.2642	18.2711	0.00376207	0.993057	Active	50.8754	39.2231	0.564664	64780000	64785000	Moderate activity	17.9757	14.5159	0.61879	3.45977	0.956457	0.980116	0.998826	0.998468	0.999467	0.9973	0.9988	1	-0.00017381	92.186	92.9844	0.874024	-0.0124277	30.2683	26.561	0.21043	0.187835
Higher RPS in Berkshire	15	64892153	ENSSSCG00000015874	ACVR1	19.2642	18.2711	0.00376207	0.993057	Active	50.8754	39.2231	0.564664	64785000	64790000	Moderate activity	36.914	25.3757	0.150124	11.5383	0.96711	0.860023	0.998826	0.998468	0.999467	0.997351	0.998266	0.9999	-0.000195	92.186	92.9844	0.874024	-0.0124277	69.9282	66.3941	0.730355	0.0747086
Higher RPS in Berkshire	15	64892153	ENSSSCG00000015874	ACVR1	19.2642	18.2711	0.00376207	0.993057	Active	50.8754	39.2231	0.564664	64790000	64795000	Moderate activity	32.2276	34.7276	0.635259	-2.50001	0.964528	0.985063	0.998826	0.998468	0.999467	0.995855	0.996837	1	-0.000178947	92.186	92.9844	0.874024	-0.0124277	28.8437	30.6777	0.751004	-0.0886361
Higher RPS in Berkshire	15	64892153	ENSSSCG00000015874	ACVR1	19.2642	18.2711	0.00376207	0.993057	Active	50.8754	39.2231	0.564664	64795000	64800000	Moderate activity	26.4455	31.023	0.441608	-4.57753	0.976234	0.997339	0.998826	0.998468	0.999467	0.990312	0.99798	1	0.000155556	92.186	92.9844	0.874024	-0.0124277	45.4382	40.2947	0.277191	0.172913
Higher RPS in Berkshire	15	64892153	ENSSSCG00000015874	ACVR1	19.2642	18.2711	0.00376207	0.993057	Active	50.8754	39.2231	0.564664	64800000	64805000	Moderate activity	38.4082	26.6477	0.0943031	11.7606	0.978234	0.963471	0.998826	0.998468	0.999467	0.99635	0.996733	0.9999	0.000164706	92.186	92.9844	0.874024	-0.0124277	57.1939	61.5074	0.267685	-0.104723
Higher RPS in Berkshire	15	64892153	ENSSSCG00000015874	ACVR1	19.2642	18.2711	0.00376207	0.993057	Active	50.8754	39.2231	0.564664	64805000	64810000	Moderate activity	28.9375	19.2532	0.502885	9.68427	0.870568	0.964596	0.998826	0.998468	0.999467	0.994586	0.996474	0.9996	0.000209375	92.186	92.9844	0.874024	-0.0124277	24.2883	30.8852	0.0354065	-0.34539
Higher RPS in Berkshire	15	64892153	ENSSSCG00000015874	ACVR1	19.2642	18.2711	0.00376207	0.993057	Active	50.8754	39.2231	0.564664	64810000	64815000	Less activity	21.7798	17.0337	0.413392	4.7461	0.863221	0.98526	0.998826	0.998468	0.999467	0.995702	0.994471	1	0.000123333	92.186	92.9844	0.874024	-0.0124277	14.977	15.5137	0.815151	-0.0504655
Higher RPS in Berkshire	15	64892153	ENSSSCG00000015874	ACVR1	19.2642	18.2711	0.00376207	0.993057	Active	50.8754	39.2231	0.564664	64815000	64820000	Less activity	25.0496	20.4973	0.48165	4.55223	0.866754	0.967962	0.998826	0.998468	0.999467	0.992692	0.991029	1	0.000267857	92.186	92.9844	0.874024	-0.0124277	21.0418	16.0626	0.108352	0.387437
Higher RPS in Berkshire	15	64892153	ENSSSCG00000015874	ACVR1	19.2642	18.2711	0.00376207	0.993057	Active	50.8754	39.2231	0.564664	64820000	64825000	Less activity	22.7004	24.5978	0.652335	-1.89745	0.973623	0.985498	0.998826	0.998468	0.999467	0.991416	0.993817	1	0.00025	92.186	92.9844	0.874024	-0.0124277	34.4665	41.9347	0.0914313	-0.282206
Higher RPS in Berkshire	15	64892153	ENSSSCG00000015874	ACVR1	19.2642	18.2711	0.00376207	0.993057	Active	50.8754	39.2231	0.564664	64825000	64830000	Less activity	38.2085	33.6346	0.50904	4.57389	0.991649	0.996947	0.998826	0.998468	0.999467	0.996206	0.99601	1	0.000329167	92.186	92.9844	0.874024	-0.0124277	46.3698	43.6107	0.560284	0.0883085
Higher RPS in Berkshire	15	64892153	ENSSSCG00000015874	ACVR1	19.2642	18.2711	0.00376207	0.993057	Active	50.8754	39.2231	0.564664	64830000	64835000	Less activity	42.1659	38.9051	0.18403	3.26088	0.965358	0.922777	0.998826	0.998468	0.999467	0.997153	0.997636	1	0.000377273	92.186	92.9844	0.874024	-0.0124277	64.9286	60.4646	0.197801	0.102601
Higher RPS in Berkshire	15	64892153	ENSSSCG00000015874	ACVR1	19.2642	18.2711	0.00376207	0.993057	Active	50.8754	39.2231	0.564664	64835000	64840000	Less activity	47.1851	45.7972	0.877687	1.38791	0.977431	0.927761	0.998826	0.998468	0.999467	0.991865	0.99027	1	0.000395	92.186	92.9844	0.874024	-0.0124277	157.314	143.521	0.527406	0.132294
Higher RPS in Berkshire	15	64892153	ENSSSCG00000015874	ACVR1	19.2642	18.2711	0.00376207	0.993057	Active	50.8754	39.2231	0.564664	64840000	64845000	Less activity	29.6996	25.1692	0.559694	4.53041	0.94549	0.818021	0.998826	0.998468	0.999467	0.9977	0.998267	1	0.000383333	92.186	92.9844	0.874024	-0.0124277	47.6405	45.2759	0.164591	0.0732874
Higher RPS in Berkshire	15	93556912	ENSSSCG00000016034	COL3A1	11.9208	11.121	0.005772	0.7998	Active	-	-	-	93185000	93190000	Less activity	20.4102	15.4115	0.374481	4.9987	0.971651	0.875501	0.99855	0.998967	1	0.992897	0.99453	1	-0.00497945	16.1114	15.3396	0.691618	0.0703732	15.1046	17.0293	0.385774	-0.171957
Higher RPS in Berkshire	15	93556912	ENSSSCG00000016034	COL3A1	11.9208	11.121	0.005772	0.7998	Active	-	-	-	93190000	93195000	Less activity	18.7882	20.9988	0.761541	-2.21059	0.916472	0.912961	0.99855	0.998967	1	0.983063	0.990825	1	-0.0049375	16.1114	15.3396	0.691618	0.0703732	21.3111	22.2962	0.465935	-0.0648898
Higher RPS in Berkshire	15	93556912	ENSSSCG00000016034	COL3A1	11.9208	11.121	0.005772	0.7998	Active	-	-	-	93195000	93200000	Less activity	47.3887	49.2993	0.760633	-1.91066	0.983121	0.875937	0.99855	0.998967	1	0.995202	0.994937	0.9998	-0.00501338	16.1114	15.3396	0.691618	0.0703732	19.9486	19.049	0.786096	0.0662346
Higher RPS in Berkshire	15	93556912	ENSSSCG00000016034	COL3A1	11.9208	11.121	0.005772	0.7998	Active	-	-	-	93200000	93205000	Less activity	83.9914	44.2746	0.389328	39.7168	0.989684	0.922985	0.99855	0.998967	1	0.998201	0.998668	1	-0.00507643	16.1114	15.3396	0.691618	0.0703732	6.73111	7.53524	0.654992	-0.160554
Higher RPS in Berkshire	15	93556912	ENSSSCG00000016034	COL3A1	11.9208	11.121	0.005772	0.7998	Active	-	-	-	93205000	93210000	Less activity	41.2901	39.8612	0.832227	1.42887	0.963874	0.913745	0.99855	0.998967	1	0.9969	0.997066	0.9998	-0.00515507	16.1114	15.3396	0.691618	0.0703732	18.2496	14.6724	0.277846	0.312851
Higher RPS in Berkshire	15	93556912	ENSSSCG00000016034	COL3A1	11.9208	11.121	0.005772	0.7998	Active	-	-	-	93210000	93215000	Less activity	28.905	25.184	0.695486	3.72098	0.835564	0.869076	0.99855	0.998967	1	0.991628	0.986532	1	-0.00515221	16.1114	15.3396	0.691618	0.0703732	17.5918	16.3858	0.466672	0.101859
Higher RPS in Berkshire	15	93556912	ENSSSCG00000016034	COL3A1	11.9208	11.121	0.005772	0.7998	Active	-	-	-	93215000	93220000	Less activity	34.9989	13.9164	0.124156	21.0825	0.816198	0.964724	0.99855	0.998967	1	0.962832	0.952183	1	-0.00475896	16.1114	15.3396	0.691618	0.0703732	14.0264	12.1058	0.147837	0.210823
Higher RPS in Berkshire	15	93556912	ENSSSCG00000016034	COL3A1	11.9208	11.121	0.005772	0.7998	Active	-	-	-	93230000	93235000	Less activity	20.1826	18.4527	0.788301	1.72986	0.969436	0.955151	0.99855	0.998967	1	0.93238	0.996168	1	-0.00593125	16.1114	15.3396	0.691618	0.0703732	9.95665	8.23528	0.272816	0.270846
Higher RPS in Berkshire	15	104099188	ENSSSCG00000016091	KCTD18	7.5432	6.53513	0.0242272	1.00807	Active	5.09737	6.87622	0.425718	103585000	103590000	Less activity	23.0642	13.3566	0.0985124	9.70766	0.73761	0.459757	0.991454	0.993836	1	0.993504	0.997003	1	0.00325347	403.103	444.329	0.0811895	-0.140448	20.3274	23.2341	0.610174	-0.19193
Higher RPS in Berkshire	15	104099188	ENSSSCG00000016091	KCTD18	7.5432	6.53513	0.0242272	1.00807	Active	5.09737	6.87622	0.425718	103590000	103595000	Moderate activity	34.7385	20.7781	0.0372912	13.9604	0.688883	0.746817	0.991454	0.993836	1	0.990267	0.98719	1	0.003262	403.103	444.329	0.0811895	-0.140448	20.7479	21.5187	0.699347	-0.0523803
Higher RPS in Berkshire	15	104099188	ENSSSCG00000016091	KCTD18	7.5432	6.53513	0.0242272	1.00807	Active	5.09737	6.87622	0.425718	103595000	103600000	Moderate activity	38.4599	28.5199	0.241284	9.93994	0.933355	0.575033	0.991454	0.993836	1	0.938589	0.995969	1	0.00388232	403.103	444.329	0.0811895	-0.140448	64.415	49.7005	0.00879244	0.373476
Higher RPS in Berkshire	15	104099188	ENSSSCG00000016091	KCTD18	7.5432	6.53513	0.0242272	1.00807	Active	5.09737	6.87622	0.425718	103600000	103605000	Moderate activity	46.1678	25.63	0.0264613	20.5377	0.838666	0.531998	0.991454	0.993836	1	0.99241	0.994803	1	0.00391684	403.103	444.329	0.0811895	-0.140448	24.0013	24.5992	0.875283	-0.0353504
Higher RPS in Berkshire	15	104099188	ENSSSCG00000016091	KCTD18	7.5432	6.53513	0.0242272	1.00807	Active	5.09737	6.87622	0.425718	103605000	103610000	Moderate activity	25.1959	19.006	0.23419	6.18987	0.647619	0.577421	0.991454	0.993836	1	0.9959	0.995068	1	0.00395412	403.103	444.329	0.0811895	-0.140448	18.4758	18.1039	0.86671	0.0291734
Higher RPS in Berkshire	15	104099384	ENSSSCG00000016092	SGO2	7.5432	6.53513	0.0242272	1.00807	Active	28.9036	25.9732	0.526699	103585000	103590000	Less activity	23.0642	13.3566	0.0985124	9.70766	0.855228	0.455515	0.991454	0.993836	1	0.993504	0.997003	1	0.00325347	403.103	444.329	0.0811895	-0.140448	20.3274	23.2341	0.610174	-0.19193
Higher RPS in Berkshire	15	104099384	ENSSSCG00000016092	SGO2	7.5432	6.53513	0.0242272	1.00807	Active	28.9036	25.9732	0.526699	103590000	103595000	Moderate activity	34.7385	20.7781	0.0372912	13.9604	0.910912	0.452926	0.991454	0.993836	1	0.990267	0.98719	1	0.003262	403.103	444.329	0.0811895	-0.140448	20.7479	21.5187	0.699347	-0.0523803
Higher RPS in Berkshire	15	104099384	ENSSSCG00000016092	SGO2	7.5432	6.53513	0.0242272	1.00807	Active	28.9036	25.9732	0.526699	103595000	103600000	Moderate activity	38.4599	28.5199	0.241284	9.93994	0.921765	0.470646	0.991454	0.993836	1	0.938589	0.995969	1	0.00388232	403.103	444.329	0.0811895	-0.140448	64.415	49.7005	0.00879244	0.373476
Higher RPS in Berkshire	15	104099384	ENSSSCG00000016092	SGO2	7.5432	6.53513	0.0242272	1.00807	Active	28.9036	25.9732	0.526699	103600000	103605000	Moderate activity	46.1678	25.63	0.0264613	20.5377	0.731253	0.324704	0.991454	0.993836	1	0.99241	0.994803	1	0.00391684	403.103	444.329	0.0811895	-0.140448	24.0013	24.5992	0.875283	-0.0353504
Higher RPS in Berkshire	15	104099384	ENSSSCG00000016092	SGO2	7.5432	6.53513	0.0242272	1.00807	Active	28.9036	25.9732	0.526699	103605000	103610000	Moderate activity	25.1959	19.006	0.23419	6.18987	0.88251	0.55197	0.991454	0.993836	1	0.9959	0.995068	1	0.00395412	403.103	444.329	0.0811895	-0.140448	18.4758	18.1039	0.86671	0.0291734
Higher RPS in Berkshire	15	117420253	ENSSSCG00000047733	Unknown	2.03696	1.35976	0.0271709	0.6772	Inactive	0.158364	0.158364	-	117480000	117485000	Less activity	136.384	29.2678	0.0826344	107.116	0.50981	0.756459	0.997002	0.998701	0.998766	0.99855	0.999633	0.998667	0.00366818	11.4084	8.71455	0.366682	0.384722	5.90606	3.85524	0.135715	0.602654
Higher RPS in Berkshire	15	118273680	ENSSSCG00000016175	MREG	8.16678	7.43308	0.0041359	0.733699	Active	3.29886	3.25764	0.503144	118205000	118210000	Less activity	23.9936	23.0143	0.851833	0.979304	0.654104	0.326871	0.997654	0.997872	0.9995	0.984633	0.992816	0.993277	-0.000741667	23.648	28.1389	0.142238	-0.24988	28.5033	29.6518	0.733351	-0.0567941
Higher RPS in Berkshire	15	118273680	ENSSSCG00000016175	MREG	8.16678	7.43308	0.0041359	0.733699	Active	3.29886	3.25764	0.503144	118210000	118215000	Less activity	49.6109	34.6337	0.105371	14.9772	0.509131	0.526583	0.997654	0.997872	0.9995	0.99267	0.993417	0.994859	-0.000877273	23.648	28.1389	0.142238	-0.24988	16.9471	14.1198	0.115104	0.261622
Higher RPS in Berkshire	15	118273680	ENSSSCG00000016175	MREG	8.16678	7.43308	0.0041359	0.733699	Active	3.29886	3.25764	0.503144	118215000	118220000	Less activity	57.5158	47.2573	0.00229302	10.2585	0.450643	0.443996	0.997654	0.997872	0.9995	0.984236	0.98869	0.98799	-0.001105	23.648	28.1389	0.142238	-0.24988	20.7875	21.156	0.518401	-0.0252337
Higher RPS in Berkshire	15	118273680	ENSSSCG00000016175	MREG	8.16678	7.43308	0.0041359	0.733699	Active	3.29886	3.25764	0.503144	118220000	118225000	Less activity	48.3249	25.0093	0.0316492	23.3156	0.614324	0.532647	0.997654	0.997872	0.9995	0.988617	0.989405	0.992057	-0.0011	23.648	28.1389	0.142238	-0.24988	62.1908	60.4064	0.729884	0.0419302
Higher RPS in Berkshire	15	118273680	ENSSSCG00000016175	MREG	8.16678	7.43308	0.0041359	0.733699	Active	3.29886	3.25764	0.503144	118225000	118230000	Less activity	45.0077	29.1362	0.067207	15.8715	0.620291	0.582522	0.997654	0.997872	0.9995	0.988959	0.988339	0.995376	-0.0014375	23.648	28.1389	0.142238	-0.24988	61.9337	62.2674	0.957904	-0.0077382
Higher RPS in Berkshire	15	120433952	ENSSSCG00000039798	SLC11A1	8.31441	7.48324	0.0184852	0.831171	Active	2.57319	3.2091	0.445012	120350000	120355000	Less activity	43.1549	31.4996	0.301575	11.6553	0.592403	0.273843	0.993277	0.992136	0.995535	0.991056	0.991877	0.998567	0.00367	36.0023	35.3281	0.912853	0.0271987	62.4492	65.051	0.715517	-0.058797
Higher RPS in Berkshire	15	120433952	ENSSSCG00000039798	SLC11A1	8.31441	7.48324	0.0184852	0.831171	Active	2.57319	3.2091	0.445012	120355000	120360000	Less activity	40.6715	20.7119	0.100238	19.9596	0.406704	0.326495	0.993277	0.992136	0.995535	0.993226	0.994532	0.9981	0.0039	36.0023	35.3281	0.912853	0.0271987	140.947	136.044	0.00959506	0.0510368
Higher RPS in Berkshire	15	120433952	ENSSSCG00000039798	SLC11A1	8.31441	7.48324	0.0184852	0.831171	Active	2.57319	3.2091	0.445012	120360000	120365000	Less activity	56.3847	29.9682	0.13354	26.4165	0.376388	0.032376	0.993277	0.992136	0.995535	0.994424	0.993366	0.996301	0.00411923	36.0023	35.3281	0.912853	0.0271987	216.117	200.284	0.202906	0.109714
Higher RPS in Berkshire	15	120433952	ENSSSCG00000039798	SLC11A1	8.31441	7.48324	0.0184852	0.831171	Active	2.57319	3.2091	0.445012	120370000	120375000	Less activity	59.4582	41.8443	0.300229	17.6139	0.362444	0.351288	0.993277	0.992136	0.995535	0.960375	0.994475	0.950358	0.00834545	36.0023	35.3281	0.912853	0.0271987	37.4285	40.4802	0.20399	-0.112787
Higher RPS in Berkshire	15	120433952	ENSSSCG00000039798	SLC11A1	8.31441	7.48324	0.0184852	0.831171	Active	2.57319	3.2091	0.445012	120375000	120380000	Less activity	37.6684	37.1612	0.961875	0.507157	0.243996	0.0835115	0.993277	0.992136	0.995535	0.944796	0.942676	0.9656	0.005865	36.0023	35.3281	0.912853	0.0271987	55.0876	72.531	0.313438	-0.396243
Higher RPS in Berkshire	15	121553288	ENSSSCG00000021610	CHPF	4.07865	3.52294	0.0462001	0.55571	Active	6.75708	10.0308	0.402498	121465000	121470000	Less activity	27.2816	24.0942	0.760247	3.18738	0.203182	0.199458	0.99705	0.996267	0.998267	0.992379	0.993139	0.996466	-0.001375	140.415	161.374	0.253576	-0.20058	25.3343	32.0029	0.48196	-0.33593
Higher RPS in Berkshire	15	121553288	ENSSSCG00000021610	CHPF	4.07865	3.52294	0.0462001	0.55571	Active	6.75708	10.0308	0.402498	121470000	121475000	Less activity	24.7725	27.5196	0.816624	-2.74704	0.115104	0.117847	0.99705	0.996267	0.998267	0.987733	0.995636	0.98641	-0.00112333	140.415	161.374	0.253576	-0.20058	30.0783	38.7391	0.246132	-0.364
Higher RPS in Berkshire	15	121553288	ENSSSCG00000021610	CHPF	4.07865	3.52294	0.0462001	0.55571	Active	6.75708	10.0308	0.402498	121475000	121480000	Less activity	22.5301	7.16468	0.0519792	15.3655	0.0834333	0.103898	0.99705	0.996267	0.998267	0.992594	0.991395	0.99677	-0.00110714	140.415	161.374	0.253576	-0.20058	25.2813	27.2834	0.347477	-0.109536
Higher RPS in Berkshire	15	121553693	ENSSSCG00000027541	TMEM198	4.07865	3.52294	0.0462001	0.55571	Active	0.956902	1.85193	0.340676	121465000	121470000	Less activity	27.2816	24.0942	0.760247	3.18738	0.353266	0.32426	0.99705	0.996267	0.998267	0.992379	0.993139	0.996466	-0.001375	140.415	161.374	0.253576	-0.20058	25.3343	32.0029	0.48196	-0.33593
Higher RPS in Berkshire	15	121553693	ENSSSCG00000027541	TMEM198	4.07865	3.52294	0.0462001	0.55571	Active	0.956902	1.85193	0.340676	121470000	121475000	Less activity	24.7725	27.5196	0.816624	-2.74704	0.27569	0.430613	0.99705	0.996267	0.998267	0.987733	0.995636	0.98641	-0.00112333	140.415	161.374	0.253576	-0.20058	30.0783	38.7391	0.246132	-0.364
Higher RPS in Berkshire	15	121553693	ENSSSCG00000027541	TMEM198	4.07865	3.52294	0.0462001	0.55571	Active	0.956902	1.85193	0.340676	121475000	121480000	Less activity	22.5301	7.16468	0.0519792	15.3655	0.161628	0.323269	0.99705	0.996267	0.998267	0.992594	0.991395	0.99677	-0.00110714	140.415	161.374	0.253576	-0.20058	25.2813	27.2834	0.347477	-0.109536
Higher RPS in Berkshire	15	132630362	ENSSSCG00000043146	Unknown	1.38398	0.258639	0.0146581	1.12534	Inactive	0.209743	0.261942	-	132545000	132550000	Less activity	26.5517	2.45705	0.0377679	24.0946	0.389119	0.538138	0.996425	0.997233	0.997134	0.992936	0.991685	0.9927	-0.00105	8.8237	11.4531	0.448666	-0.372573	10.669	10.2882	0.859683	0.0519461
Higher RPS in Berkshire	15	132918912	ENSSSCG00000016284	ALPI	5.87284	5.00034	0.028515	0.872502	Inactive	0.199885	0.199885	-	132490000	132495000	Less activity	30.3725	21.7609	0.333117	8.61159	0.436771	0.615218	0.934271	0.918073	0.933209	0.987848	0.990061	0.989834	-0.0024631	17.9391	32.8244	0.0511273	-0.868034	25.7647	22.3509	0.0556328	0.20421
Higher RPS in Berkshire	15	132918912	ENSSSCG00000016284	ALPI	5.87284	5.00034	0.028515	0.872502	Inactive	0.199885	0.199885	-	132965000	132970000	Less activity	136.33	64.3017	0.253793	72.0279	0.397806	0.404803	0.934271	0.918073	0.933209	0.993812	0.994972	0.992651	-0.00283333	17.9391	32.8244	0.0511273	-0.868034	14.8325	12.5047	0.440761	0.244497
Higher RPS in Berkshire	15	132918912	ENSSSCG00000016284	ALPI	5.87284	5.00034	0.028515	0.872502	Inactive	0.199885	0.199885	-	132970000	132975000	Less activity	64.2899	60.232	0.701164	4.05789	0.565026	0.269004	0.934271	0.918073	0.933209	0.989045	0.994619	0.98565	-0.00246	17.9391	32.8244	0.0511273	-0.868034	16.7523	18.7505	0.32954	-0.161656
Higher RPS in Berkshire	15	132918912	ENSSSCG00000016284	ALPI	5.87284	5.00034	0.028515	0.872502	Inactive	0.199885	0.199885	-	132980000	132985000	Less activity	29.0718	6.67916	0.229155	22.3926	0.436477	0.599201	0.934271	0.918073	0.933209	0.990885	0.994971	0.989346	-0.00284167	17.9391	32.8244	0.0511273	-0.868034	14.9456	11.3389	0.0618693	0.395402
Higher RPS in Berkshire	15	133034454	ENSSSCG00000016286	PRSS56	1.44617	0.742539	0.0488116	0.703633	Inactive	0.0138586	0.0138586	-	132495000	132500000	Less activity	28.5162	6.68	0.0183143	21.8362	0.579015	0.609324	0.983224	0.985838	0.981589	0.99057	0.991022	0.994202	-0.00174811	25.2747	22.4523	0.706071	0.170115	26.0997	24.9047	0.394232	0.067353
Higher RPS in Berkshire	15	139605807	ENSSSCG00000035083	AQP12A	5.60086	3.01139	0.0154329	2.58946	Inactive	1.21404	1.15847	0.511712	139510000	139515000	Less activity	18.5614	12.2946	0.727549	6.26677	0.45229	0.694674	0.982835	0.976727	0.999367	0.994687	0.993684	0.996903	-0.00035	31.7105	27.5183	0.468782	0.203878	16.8867	16.9971	0.972635	-0.00934454
Higher RPS in Berkshire	15	139605807	ENSSSCG00000035083	AQP12A	5.60086	3.01139	0.0154329	2.58946	Inactive	1.21404	1.15847	0.511712	139515000	139520000	Less activity	76.5871	0	0.18697	76.5871	0.575785	0.800992	0.982835	0.976727	0.999367	0.993809	0.992544	0.997004	-0.000482353	31.7105	27.5183	0.468782	0.203878	27.2014	25.3565	0.343672	0.100938
Higher RPS in Berkshire	15	139605807	ENSSSCG00000035083	AQP12A	5.60086	3.01139	0.0154329	2.58946	Inactive	1.21404	1.15847	0.511712	139665000	139670000	Moderate activity	41.0293	0	0.220467	41.0293	0.833027	0.720728	0.982835	0.976727	0.999367	0.990417	0.995729	0.99132	0.000209091	31.7105	27.5183	0.468782	0.203878	77.3331	68.7726	0.494119	0.169019
Higher RPS in Berkshire	15	139605807	ENSSSCG00000035083	AQP12A	5.60086	3.01139	0.0154329	2.58946	Inactive	1.21404	1.15847	0.511712	139775000	139780000	Less activity	25.6582	14.5332	0.54051	11.1251	0.38687	0.594825	0.982835	0.976727	0.999367	0.997837	0.997117	0.998901	0.000280303	31.7105	27.5183	0.468782	0.203878	12.9512	9.10704	0.219499	0.503374
Higher RPS in Berkshire	15	139605807	ENSSSCG00000035083	AQP12A	5.60086	3.01139	0.0154329	2.58946	Inactive	1.21404	1.15847	0.511712	139835000	139840000	Less activity	38.0092	21.152	0.277129	16.8572	0.311403	0.828721	0.982835	0.976727	0.999367	0.997002	0.996137	0.998668	-0.000103333	31.7105	27.5183	0.468782	0.203878	15.4887	12.3713	0.375521	0.321897
Higher RPS in Berkshire	15	139694826	ENSSSCG00000016401	KIF1A	2.89675	2.27937	0.0334138	0.61738	Active	0.22119	0.289567	-	139600000	139605000	Less activity	3.55496	25.28	0.251424	-21.7251	0.341213	0.288646	0.998063	0.998839	0.998082	0.989387	0.988204	0.995745	-0.000223529	16.5036	20.0425	0.430879	-0.278747	64.6937	75.2726	0.210517	-0.218187
Higher RPS in Berkshire	15	139694826	ENSSSCG00000016401	KIF1A	2.89675	2.27937	0.0334138	0.61738	Active	0.22119	0.289567	-	139665000	139670000	Moderate activity	58.9214	67.2478	0.894224	-8.3264	0.359405	0.441963	0.998063	0.998839	0.998082	0.990417	0.995729	0.99132	-0.000425	16.5036	20.0425	0.430879	-0.278747	77.3331	68.7726	0.494119	0.169019
Higher RPS in Berkshire	15	139694826	ENSSSCG00000016401	KIF1A	2.89675	2.27937	0.0334138	0.61738	Active	0.22119	0.289567	-	139790000	139795000	Less activity	24.5545	0.0928426	0.0594435	24.4616	0.413645	0.366543	0.998063	0.998839	0.998082	0.997951	0.997868	0.998867	0.000313158	16.5036	20.0425	0.430879	-0.278747	103.837	100.762	0.844376	0.0433306
Higher RPS in Berkshire	9	1485986	ENSSSCG00000031202	Unknown	6.56467	4.63568	0.00691047	1.92899	Inactive	0	0	-	1670000	1675000	Less activity	41.4208	12.5121	0.256862	28.9087	0.319136	0.624203	0.983267	0.98615	0.999667	0.988618	0.987182	0.996078	0.029125	26.1512	28.7457	0.734789	-0.13597	15.8775	18.6962	0.283449	-0.234404
Higher RPS in Berkshire	9	1485986	ENSSSCG00000031202	Unknown	6.56467	4.63568	0.00691047	1.92899	Inactive	0	0	-	1675000	1680000	Less activity	99.2279	67.8426	0.212394	31.3853	0.335473	0.142916	0.983267	0.98615	0.999667	0.99073	0.992917	0.994615	0.0283216	26.1512	28.7457	0.734789	-0.13597	17.1047	18.939	0.626672	-0.146153
Higher RPS in Berkshire	9	1485986	ENSSSCG00000031202	Unknown	6.56467	4.63568	0.00691047	1.92899	Inactive	0	0	-	1715000	1720000	Less activity	30.8845	9.96582	0.416402	20.9186	0.211782	0.0540204	0.983267	0.98615	0.999667	1	1	1	0.0240033	26.1512	28.7457	0.734789	-0.13597	0.248117	0.255581	0.946336	-
Higher RPS in Berkshire	9	1485986	ENSSSCG00000031202	Unknown	6.56467	4.63568	0.00691047	1.92899	Inactive	0	0	-	1890000	1895000	Less activity	75.0254	57.1877	0.435418	17.8377	0.29993	0.332231	0.983267	0.98615	0.999667	0.984579	0.990884	0.997229	0.0143187	26.1512	28.7457	0.734789	-0.13597	28.4058	32.6024	0.177847	-0.19814
Higher RPS in Berkshire	9	1917623	ENSSSCG00000044470	Unknown	2.37687	0	0.0165433	2.37687	Inactive	0	0	-	1770000	1775000	Less activity	32.5539	0	0.110978	32.5539	0.121388	0.508339	0.922598	0.889707	0.996699	1	1	1	0.000517857	38.5391	35.5608	0.231701	0.115723	0.249937	0.245417	0.983306	-
Higher RPS in Berkshire	9	1917623	ENSSSCG00000044470	Unknown	2.37687	0	0.0165433	2.37687	Inactive	0	0	-	1885000	1890000	Less activity	29.7563	0	0.103199	29.7563	0.369773	0.545974	0.922598	0.889707	0.996699	0.963161	0.982144	0.996847	-0.01036	38.5391	35.5608	0.231701	0.115723	25.308	25.5672	0.93945	-0.0146445
Higher RPS in Berkshire	9	3288172	ENSSSCG00000014626	HPX	3.15245	2.8191	0.00183768	0.333352	Active	2428.58	2490.36	0.49372	3240000	3245000	Less activity	36.6072	32.6478	0.402783	3.95939	0.23821	0.337375	0.992558	0.996204	0.997299	0.998776	0.998501	0.999467	0.000275	523.668	554.027	0.341672	-0.0812901	19.3962	19.111	0.901985	0.0212615
Higher RPS in Berkshire	9	3288172	ENSSSCG00000014626	HPX	3.15245	2.8191	0.00183768	0.333352	Active	2428.58	2490.36	0.49372	3330000	3335000	Less activity	40.0241	19.5815	0.0356117	20.4426	0.0539861	0.566554	0.992558	0.996204	0.997299	0.855738	0.811861	0.992108	-0.00074375	523.668	554.027	0.341672	-0.0812901	46.8854	49.6603	0.692115	-0.0827828
Higher RPS in Berkshire	9	4489946	ENSSSCG00000014695	Unknown	17.4454	15.0111	0.0167014	2.43434	Active	0.00893535	0.00893535	-	3515000	3520000	Moderate activity	20.1826	0	0.181695	20.1826	0.328776	0.235657	0.997725	0.998133	0.9992	0.9996	1	1	0.000915544	9.70244	12.1206	0.556882	-0.318102	2.82825	2.61452	0.711966	0.109339
Higher RPS in Berkshire	9	4489946	ENSSSCG00000014695	Unknown	17.4454	15.0111	0.0167014	2.43434	Active	0.00893535	0.00893535	-	4560000	4565000	Less activity	114.436	88.6708	0.368809	25.7656	0.555238	0.2098	0.997725	0.998133	0.9992	0.99985	0.999767	1	-0.000296429	9.70244	12.1206	0.556882	-0.318102	2.42564	1.40672	0.341056	0.745237
Higher RPS in Berkshire	9	4489946	ENSSSCG00000014695	Unknown	17.4454	15.0111	0.0167014	2.43434	Active	0.00893535	0.00893535	-	4565000	4570000	Less activity	208.218	128.982	0.197464	79.236	0.35952	0.470915	0.997725	0.998133	0.9992	0.99645	0.997667	0.9965	-0.000276667	9.70244	12.1206	0.556882	-0.318102	10.6421	11.1463	0.914285	-0.0661798
Higher RPS in Berkshire	9	4489946	ENSSSCG00000014695	Unknown	17.4454	15.0111	0.0167014	2.43434	Active	0.00893535	0.00893535	-	4570000	4575000	Less activity	548.617	398.717	0.208398	149.9	0.406505	0.271371	0.997725	0.998133	0.9992	0.995752	0.996202	0.996935	-0.000259375	9.70244	12.1206	0.556882	-0.318102	17.7524	12.0691	0.242914	0.552898
Higher RPS in Berkshire	9	4489946	ENSSSCG00000014695	Unknown	17.4454	15.0111	0.0167014	2.43434	Active	0.00893535	0.00893535	-	4575000	4580000	Less activity	161.537	77.4164	0.11182	84.1203	0.299272	0.339892	0.997725	0.998133	0.9992	0.994607	0.996005	0.995871	-0.000229412	9.70244	12.1206	0.556882	-0.318102	16.9985	21.0428	0.421832	-0.3063
Higher RPS in Berkshire	9	4489946	ENSSSCG00000014695	Unknown	17.4454	15.0111	0.0167014	2.43434	Active	0.00893535	0.00893535	-	4580000	4585000	Less activity	72.8201	59.7075	0.47322	13.1126	0.0999509	0.420114	0.997725	0.998133	0.9992	0.992382	0.992068	0.996134	-0.000208333	9.70244	12.1206	0.556882	-0.318102	23.2714	14.1761	0.0225823	0.711143
Higher RPS in Berkshire	9	4489946	ENSSSCG00000014695	Unknown	17.4454	15.0111	0.0167014	2.43434	Active	0.00893535	0.00893535	-	4585000	4590000	Less activity	48.6591	40.3926	0.65205	8.26648	0.226996	0.278855	0.997725	0.998133	0.9992	0.993028	0.995334	0.99427	-0.000155263	9.70244	12.1206	0.556882	-0.318102	22.9282	17.7822	0.117892	0.364883
Higher RPS in Berkshire	9	4489946	ENSSSCG00000014695	Unknown	17.4454	15.0111	0.0167014	2.43434	Active	0.00893535	0.00893535	-	4655000	4660000	Less activity	37.1111	0	0.197495	37.1111	0.313569	0.0587304	0.997725	0.998133	0.9992	0.99995	1	0.9999	-0.000186364	9.70244	12.1206	0.556882	-0.318102	0.651632	0.608613	0.929143	-
Higher RPS in Berkshire	9	4489946	ENSSSCG00000014695	Unknown	17.4454	15.0111	0.0167014	2.43434	Active	0.00893535	0.00893535	-	4930000	4935000	Less activity	38.443	51.6292	0.403453	-13.1863	0.0346157	0.2948	0.997725	0.998133	0.9992	0.965447	0.963353	0.98557	-0.000211932	9.70244	12.1206	0.556882	-0.318102	5.80929	3.92531	0.120638	0.553883
Higher RPS in Berkshire	9	4489946	ENSSSCG00000014695	Unknown	17.4454	15.0111	0.0167014	2.43434	Active	0.00893535	0.00893535	-	4940000	4945000	Less activity	19.4679	33.0067	0.187885	-13.5388	0.153124	0.0451952	0.997725	0.998133	0.9992	0.994957	0.993612	0.9989	-0.000411111	9.70244	12.1206	0.556882	-0.318102	16.9701	13.9127	0.609252	0.284739
Higher RPS in Berkshire	9	4871072	ENSSSCG00000042866	OR51B5	8.01028	5.51646	0.00291522	2.49382	Inactive	0.198411	0.198411	-	4550000	4555000	Less activity	24.9545	11.475	0.271014	13.4796	0.923681	0.250648	0.990336	0.992336	0.994278	0.99965	0.9998	0.999633	-0.000384127	20.7863	27.3152	0.0438266	-0.392415	2.18308	1.33057	0.0295608	0.67439
Higher RPS in Berkshire	9	4871072	ENSSSCG00000042866	OR51B5	8.01028	5.51646	0.00291522	2.49382	Inactive	0.198411	0.198411	-	4555000	4560000	Less activity	39.3208	4.51905	0.012157	34.8017	0.158547	0.256778	0.990336	0.992336	0.994278	0.99945	0.9997	0.9995	-0.000385484	20.7863	27.3152	0.0438266	-0.392415	0.63202	0.252298	0.391453	-
Higher RPS in Berkshire	9	4871072	ENSSSCG00000042866	OR51B5	8.01028	5.51646	0.00291522	2.49382	Inactive	0.198411	0.198411	-	4655000	4660000	Less activity	30.822	0	0.182403	30.822	0.279562	0.663928	0.990336	0.992336	0.994278	0.99995	1	0.9999	-0.000521429	20.7863	27.3152	0.0438266	-0.392415	0.651632	0.608613	0.929143	-
Higher RPS in Berkshire	9	4871072	ENSSSCG00000042866	OR51B5	8.01028	5.51646	0.00291522	2.49382	Inactive	0.198411	0.198411	-	4835000	4840000	Moderate activity	24.3953	28.9386	0.279173	-4.54326	0.503714	0.139208	0.990336	0.992336	0.994278	0.910637	0.962061	0.921971	-0.000791667	20.7863	27.3152	0.0438266	-0.392415	55.3832	56.3379	0.860333	-0.0246146
Higher RPS in Berkshire	9	4871072	ENSSSCG00000042866	OR51B5	8.01028	5.51646	0.00291522	2.49382	Inactive	0.198411	0.198411	-	4840000	4845000	Less activity	27.3642	30.6951	0.656423	-3.33091	0.551782	0.30615	0.990336	0.992336	0.994278	0.975435	0.968049	0.996694	0.00153	20.7863	27.3152	0.0438266	-0.392415	22.8777	21.2749	0.754164	0.104313
Higher RPS in Berkshire	9	4871072	ENSSSCG00000042866	OR51B5	8.01028	5.51646	0.00291522	2.49382	Inactive	0.198411	0.198411	-	4895000	4900000	Moderate activity	21.7851	35.3835	0.265172	-13.5984	0.484766	0.213855	0.990336	0.992336	0.994278	0.979491	0.991952	0.995335	0.0028875	20.7863	27.3152	0.0438266	-0.392415	41.9697	45.6997	0.492013	-0.122558
Higher RPS in Berkshire	9	5418810	ENSSSCG00000039411	OR51C1P	1.908	0.550172	0.0190115	1.35783	Inactive	0	0	-	4665000	4670000	Less activity	25.6672	13.7723	0.39632	11.8949	0.149075	0.389511	0.989721	0.995865	0.997272	1	1	1	0.00389698	22.863	20.0209	0.084536	0.190617	0.257607	0.238536	0.965423	-
Higher RPS in Berkshire	9	5418810	ENSSSCG00000039411	OR51C1P	1.908	0.550172	0.0190115	1.35783	Inactive	0	0	-	5840000	5845000	Less activity	22.8578	0.457535	0.143123	22.4002	0.391287	0.478548	0.989721	0.995865	0.997272	0.994077	0.988353	1	0.00952202	22.863	20.0209	0.084536	0.190617	0.184701	0.561593	0.342269	-
Higher RPS in Berkshire	9	26648086	ENSSSCG00000014957	C11ORF97	2.76506	2.2773	0.00367159	0.487755	Active	1.56697	0.744305	0.677968	26730000	26735000	Less activity	20.6174	14.2655	0.361302	6.35186	0.608378	0.892413	0.993158	0.992872	0.998102	0.973565	0.984575	1	-0.00994688	105.335	78.2836	0.131543	0.427724	27.9928	34.5215	0.15385	-0.301467
Higher RPS in Berkshire	9	26648086	ENSSSCG00000014957	C11ORF97	2.76506	2.2773	0.00367159	0.487755	Active	1.56697	0.744305	0.677968	26735000	26740000	Less activity	27.2418	14.8654	0.120372	12.3764	0.62345	0.886441	0.993158	0.992872	0.998102	0.980395	0.983839	1	-0.00847059	105.335	78.2836	0.131543	0.427724	24.1099	22.4638	0.520662	0.101587
Higher RPS in Berkshire	9	45172211	ENSSSCG00000015084	FXYD6-FXYD2	29.493	27.4043	0.0482156	2.08873	Active	68.7383	59.7912	0.534806	45255000	45260000	Less activity	34.006	24.5829	0.217887	9.42311	0.566574	0.683223	0.987616	0.986982	0.9999	0.98644	0.987657	0.9975	0.00576562	36.7597	34.5402	0.712117	0.089597	33.7774	27.6665	0.0276695	0.286979
Higher RPS in Berkshire	9	45172211	ENSSSCG00000015084	FXYD6-FXYD2	29.493	27.4043	0.0482156	2.08873	Active	68.7383	59.7912	0.534806	45265000	45270000	Less activity	22.7643	21.4653	0.80923	1.29899	0.688189	0.587306	0.987616	0.986982	0.9999	0.986874	0.987561	0.996107	0.00526944	36.7597	34.5402	0.712117	0.089597	30.6172	32.2565	0.813919	-0.0750082
Higher RPS in Berkshire	9	45172211	ENSSSCG00000015084	FXYD6-FXYD2	29.493	27.4043	0.0482156	2.08873	Active	68.7383	59.7912	0.534806	45270000	45275000	Less activity	21.8602	26.9584	0.494952	-5.09826	0.615021	0.71504	0.987616	0.986982	0.9999	0.991768	0.993679	0.99561	0.00491316	36.7597	34.5402	0.712117	0.089597	22.4662	28.2157	0.228079	-0.327438
Higher RPS in Berkshire	9	45172211	ENSSSCG00000015084	FXYD6-FXYD2	29.493	27.4043	0.0482156	2.08873	Active	68.7383	59.7912	0.534806	45275000	45280000	Less activity	33.3421	25.0923	0.22218	8.24984	0.787743	0.736723	0.987616	0.986982	0.9999	0.994502	0.993935	0.999301	0.004555	36.7597	34.5402	0.712117	0.089597	15.7157	15.4021	0.757605	0.0288974
Higher RPS in Berkshire	9	45172211	ENSSSCG00000015084	FXYD6-FXYD2	29.493	27.4043	0.0482156	2.08873	Active	68.7383	59.7912	0.534806	45280000	45285000	Less activity	47.0791	43.0924	0.634958	3.98674	0.610225	0.825267	0.987616	0.986982	0.9999	0.991156	0.991176	0.9999	0.00440476	36.7597	34.5402	0.712117	0.089597	32.326	30.0456	0.207853	0.105205
Higher RPS in Berkshire	9	45172211	ENSSSCG00000015084	FXYD6-FXYD2	29.493	27.4043	0.0482156	2.08873	Active	68.7383	59.7912	0.534806	45285000	45290000	Less activity	55.1298	31.9947	0.0287743	23.1352	0.882612	0.874457	0.987616	0.986982	0.9999	0.992802	0.994003	1	0.00422273	36.7597	34.5402	0.712117	0.089597	37.3523	40.3261	0.238161	-0.110233
Higher RPS in Berkshire	9	45172211	ENSSSCG00000015084	FXYD6-FXYD2	29.493	27.4043	0.0482156	2.08873	Active	68.7383	59.7912	0.534806	45290000	45295000	Moderate activity	40.449	32.3607	0.396543	8.08834	0.80243	0.700771	0.987616	0.986982	0.9999	0.987303	0.996199	1	0.00403696	36.7597	34.5402	0.712117	0.089597	33.7989	36.8581	0.528264	-0.124649
Higher RPS in Berkshire	9	45172211	ENSSSCG00000015084	FXYD6-FXYD2	29.493	27.4043	0.0482156	2.08873	Active	68.7383	59.7912	0.534806	45295000	45300000	Less activity	33.9664	25.6334	0.356391	8.33298	0.697258	0.407429	0.987616	0.986982	0.9999	0.987144	0.99435	1	0.00389375	36.7597	34.5402	0.712117	0.089597	25.4781	26.0989	0.685459	-0.0346013
Higher RPS in Berkshire	9	45172211	ENSSSCG00000015084	FXYD6-FXYD2	29.493	27.4043	0.0482156	2.08873	Active	68.7383	59.7912	0.534806	45300000	45305000	Less activity	24.5401	14.2498	0.314331	10.2903	0.392462	0.448527	0.987616	0.986982	0.9999	0.934683	0.992671	1	0.003684	36.7597	34.5402	0.712117	0.089597	33.8875	29.6222	0.136847	0.193468
Higher RPS in Berkshire	9	45172211	ENSSSCG00000015084	FXYD6-FXYD2	29.493	27.4043	0.0482156	2.08873	Active	68.7383	59.7912	0.534806	45305000	45310000	Less activity	22.5485	11.103	0.0596455	11.4455	0.624178	0.515432	0.987616	0.986982	0.9999	0.988707	0.990949	0.999266	0.00582692	36.7597	34.5402	0.712117	0.089597	31.7902	31.092	0.283514	0.0319348
Higher RPS in Berkshire	9	45172211	ENSSSCG00000015084	FXYD6-FXYD2	29.493	27.4043	0.0482156	2.08873	Active	68.7383	59.7912	0.534806	45320000	45325000	Less activity	26.3963	14.2951	0.0205584	12.1012	0.767929	0.795007	0.987616	0.986982	0.9999	0.992452	0.992233	1	0.00509138	36.7597	34.5402	0.712117	0.089597	35.444	29.1673	0.0105658	0.280317
Higher RPS in Berkshire	9	45172211	ENSSSCG00000015084	FXYD6-FXYD2	29.493	27.4043	0.0482156	2.08873	Active	68.7383	59.7912	0.534806	45345000	45350000	Less activity	16.0874	22.4801	0.278882	-6.39267	0.200127	0.320435	0.987616	0.986982	0.9999	0.987665	0.996237	1	0.00408088	36.7597	34.5402	0.712117	0.089597	21.3184	25.2198	0.161871	-0.241416
Higher RPS in Berkshire	9	45172211	ENSSSCG00000015084	FXYD6-FXYD2	29.493	27.4043	0.0482156	2.08873	Active	68.7383	59.7912	0.534806	45350000	45355000	Less activity	19.1355	21.978	0.694477	-2.8425	0.374015	0.713845	0.987616	0.986982	0.9999	0.944486	0.962383	1	0.00394857	36.7597	34.5402	0.712117	0.089597	28.5404	27.3858	0.151457	0.0593665
Higher RPS in Berkshire	9	45172211	ENSSSCG00000015084	FXYD6-FXYD2	29.493	27.4043	0.0482156	2.08873	Active	68.7383	59.7912	0.534806	45355000	45360000	Less activity	19.514	15.0064	0.461453	4.5076	0.462256	0.176983	0.987616	0.986982	0.9999	0.992777	0.990362	1	0.00250139	36.7597	34.5402	0.712117	0.089597	15.864	17.517	0.367763	-0.14215
Higher RPS in Berkshire	9	45172211	ENSSSCG00000015084	FXYD6-FXYD2	29.493	27.4043	0.0482156	2.08873	Active	68.7383	59.7912	0.534806	45360000	45365000	Less activity	24.0826	18.4925	0.501367	5.59008	0.189764	0.522348	0.987616	0.986982	0.9999	0.963034	0.951748	1	0.0023527	36.7597	34.5402	0.712117	0.089597	13.1274	10.8962	0.647544	0.266525
Higher RPS in Berkshire	9	45172211	ENSSSCG00000015084	FXYD6-FXYD2	29.493	27.4043	0.0482156	2.08873	Active	68.7383	59.7912	0.534806	45365000	45370000	Less activity	30.9742	32.0913	0.924526	-1.11711	0.378557	0.613166	0.987616	0.986982	0.9999	0.995558	0.996008	0.9999	0.00311447	36.7597	34.5402	0.712117	0.089597	16.1566	12.2794	0.466627	0.393083
Higher RPS in Berkshire	9	45172211	ENSSSCG00000015084	FXYD6-FXYD2	29.493	27.4043	0.0482156	2.08873	Active	68.7383	59.7912	0.534806	45370000	45375000	Less activity	35.2178	40.0926	0.233026	-4.87481	0.640578	0.88129	0.987616	0.986982	0.9999	0.996504	0.997103	0.999367	0.00301282	36.7597	34.5402	0.712117	0.089597	12.0699	15.0931	0.0145967	-0.320102
Higher RPS in Berkshire	9	45172211	ENSSSCG00000015084	FXYD6-FXYD2	29.493	27.4043	0.0482156	2.08873	Active	68.7383	59.7912	0.534806	45375000	45380000	Less activity	42.3531	37.5189	0.325844	4.83418	0.904935	0.85314	0.987616	0.986982	0.9999	0.990764	0.990118	0.998134	0.00293625	36.7597	34.5402	0.712117	0.089597	26.9077	26.4053	0.842832	0.0270859
Higher RPS in Berkshire	9	45172211	ENSSSCG00000015084	FXYD6-FXYD2	29.493	27.4043	0.0482156	2.08873	Active	68.7383	59.7912	0.534806	45380000	45385000	Less activity	47.243	32.8507	0.0074086	14.3923	0.825311	0.684562	0.987616	0.986982	0.9999	0.988317	0.988662	0.99864	0.00287439	36.7597	34.5402	0.712117	0.089597	38.8785	36.8716	0.538503	0.0762602
Higher RPS in Berkshire	9	45172211	ENSSSCG00000015084	FXYD6-FXYD2	29.493	27.4043	0.0482156	2.08873	Active	68.7383	59.7912	0.534806	45385000	45390000	Moderate activity	32.131	26.6591	0.448052	5.47194	0.7488	0.49108	0.987616	0.986982	0.9999	0.978102	0.97611	0.999734	0.00284881	36.7597	34.5402	0.712117	0.089597	37.8801	41.2387	0.000851422	-0.122248
Higher RPS in Berkshire	9	50829375	ENSSSCG00000050901	Unknown	14.3765	10.3387	0.0145037	4.03776	Active	0	0	-	50870000	50875000	Less activity	49.0785	10.2346	0.00980657	38.8438	0.679684	0.377735	0.995725	0.9955	0.9972	0.995348	0.990899	0.999796	-0.00015625	25.7932	25.5354	0.964268	0.0144359	1.84229	2.26007	0.61481	-0.281069
Higher RPS in Berkshire	9	50829375	ENSSSCG00000050901	Unknown	14.3765	10.3387	0.0145037	4.03776	Active	0	0	-	50875000	50880000	Less activity	40.2924	24.5572	0.294323	15.7352	0.679785	0.361061	0.995725	0.9955	0.9972	0.993875	0.995833	0.995567	-0.000638889	25.7932	25.5354	0.964268	0.0144359	31.4055	24.5672	0.139061	0.353007
Higher RPS in Berkshire	9	50829375	ENSSSCG00000050901	Unknown	14.3765	10.3387	0.0145037	4.03776	Active	0	0	-	50880000	50885000	Less activity	62.2216	24.2936	0.137606	37.9281	0.842142	0.443066	0.995725	0.9955	0.9972	0.994902	0.997668	0.994869	-0.000575	25.7932	25.5354	0.964268	0.0144359	32.1103	20.0289	0.141226	0.678252
Higher RPS in Berkshire	9	50829375	ENSSSCG00000050901	Unknown	14.3765	10.3387	0.0145037	4.03776	Active	0	0	-	50885000	50890000	Less activity	176.544	58.6204	0.14986	117.924	0.906375	0.340791	0.995725	0.9955	0.9972	0.995001	0.9969	0.995267	-0.000522727	25.7932	25.5354	0.964268	0.0144359	19.7859	19.9241	0.968293	-0.00998702
Higher RPS in Berkshire	9	50829375	ENSSSCG00000050901	Unknown	14.3765	10.3387	0.0145037	4.03776	Active	0	0	-	50890000	50895000	Less activity	165.776	91.4129	0.342817	74.3636	0.891881	0.494943	0.995725	0.9955	0.9972	0.99645	0.995767	0.997767	-0.000470833	25.7932	25.5354	0.964268	0.0144359	22.9644	13.2573	0.0197877	0.788047
Higher RPS in Berkshire	9	50829375	ENSSSCG00000050901	Unknown	14.3765	10.3387	0.0145037	4.03776	Active	0	0	-	50895000	50900000	Less activity	43.5354	14.7379	0.107787	28.7975	0.712357	0.334973	0.995725	0.9955	0.9972	0.995551	0.993368	0.998167	-0.000453846	25.7932	25.5354	0.964268	0.0144359	18.1099	16.61	0.775071	0.124012
Higher RPS in Berkshire	9	50829375	ENSSSCG00000050901	Unknown	14.3765	10.3387	0.0145037	4.03776	Active	0	0	-	50900000	50905000	Less activity	49.3759	21.0219	0.0764153	28.354	0.765631	0.304485	0.995725	0.9955	0.9972	0.993451	0.996001	0.995329	-0.000385714	25.7932	25.5354	0.964268	0.0144359	19.551	14.5663	0.204341	0.422094
Higher RPS in Berkshire	9	50829375	ENSSSCG00000050901	Unknown	14.3765	10.3387	0.0145037	4.03776	Active	0	0	-	50905000	50910000	Less activity	42.5573	17.6411	0.0346534	24.9161	0.987477	0.681505	0.995725	0.9955	0.9972	0.997575	0.997833	0.998233	-0.000466667	25.7932	25.5354	0.964268	0.0144359	9.32918	7.56135	0.615977	0.299534
Higher RPS in Berkshire	9	52146348	ENSSSCG00000015206	CCDC15	2.1922	0.896582	0.0251218	1.29562	Active	8.15235	8.00857	0.504448	50980000	50985000	Less activity	34.901	0	0.205463	34.901	0.333061	0	0.9982	0.998434	0.999367	-0.0002	0	1	0.00662414	48.3676	41.2872	0.350477	0.227836	0.24895	0.490089	0.497335	-
Higher RPS in Berkshire	9	52146348	ENSSSCG00000015206	CCDC15	2.1922	0.896582	0.0251218	1.29562	Active	8.15235	8.00857	0.504448	52265000	52270000	Moderate activity	14.7718	11.2543	0.655787	3.51758	0.118606	0.037548	0.9982	0.998434	0.999367	0.999025	0.9988	0.999267	0.00343913	48.3676	41.2872	0.350477	0.227836	11.2519	11.4089	0.926662	-0.0198089
Higher RPS in Berkshire	9	53400753	ENSSSCG00000015231	DCPS	18.212	17.331	0.0332583	0.88092	Active	149.377	110.334	0.575167	53470000	53475000	Moderate activity	26.0521	13.6875	0.00325297	12.3646	0.989248	0.815411	0.99785	0.9984	0.9995	0.997501	0.9994	0.9988	-0.0008	59.0614	62.1908	0.552122	-0.0743611	35.1882	34.858	0.944559	0.0135611
Higher RPS in Berkshire	9	53400753	ENSSSCG00000015231	DCPS	18.212	17.331	0.0332583	0.88092	Active	149.377	110.334	0.575167	53475000	53480000	Less activity	26.4836	16.4539	0.267746	10.0297	0.94423	0.641501	0.99785	0.9984	0.9995	0.997905	0.998504	0.99867	-0.00075	59.0614	62.1908	0.552122	-0.0743611	28.8452	30.231	0.831572	-0.0674723
Higher RPS in Berkshire	9	53400753	ENSSSCG00000015231	DCPS	18.212	17.331	0.0332583	0.88092	Active	149.377	110.334	0.575167	53480000	53485000	Less activity	28.2257	24.7423	0.7638	3.48333	0.838647	0.833341	0.99785	0.9984	0.9995	0.99845	0.9988	0.999567	-0.000736667	59.0614	62.1908	0.552122	-0.0743611	43.4965	38.7357	0.396958	0.166826
Higher RPS in Berkshire	9	53400753	ENSSSCG00000015231	DCPS	18.212	17.331	0.0332583	0.88092	Active	149.377	110.334	0.575167	53485000	53490000	Less activity	35.0758	25.9833	0.364307	9.09252	0.752648	0.853617	0.99785	0.9984	0.9995	0.99299	0.995794	0.995932	-0.000684375	59.0614	62.1908	0.552122	-0.0743611	115.13	110.148	0.473601	0.0637654
Higher RPS in Berkshire	9	53400753	ENSSSCG00000015231	DCPS	18.212	17.331	0.0332583	0.88092	Active	149.377	110.334	0.575167	53490000	53495000	Less activity	28.7572	35.4046	0.349203	-6.64737	0.708159	0.675688	0.99785	0.9984	0.9995	0.993279	0.9968	0.99657	-0.000641176	59.0614	62.1908	0.552122	-0.0743611	118.883	118.082	0.924142	0.00974876
Higher RPS in Berkshire	9	53400753	ENSSSCG00000015231	DCPS	18.212	17.331	0.0332583	0.88092	Active	149.377	110.334	0.575167	53495000	53500000	Less activity	24.4286	36.0251	0.0304649	-11.5965	0.613256	0.76275	0.99785	0.9984	0.9995	0.996201	0.9978	0.9998	-0.000558333	59.0614	62.1908	0.552122	-0.0743611	32.5813	31.9744	0.800308	0.0270431
Higher RPS in Berkshire	9	53400753	ENSSSCG00000015231	DCPS	18.212	17.331	0.0332583	0.88092	Active	149.377	110.334	0.575167	53500000	53505000	Less activity	22.1202	31.1237	0.336987	-9.0035	0.77435	0.64218	0.99785	0.9984	0.9995	0.991801	0.996966	0.995467	-0.000536842	59.0614	62.1908	0.552122	-0.0743611	42.2893	44.3413	0.570103	-0.0682016
Higher RPS in Berkshire	9	53400753	ENSSSCG00000015231	DCPS	18.212	17.331	0.0332583	0.88092	Active	149.377	110.334	0.575167	53505000	53510000	Less activity	28.567	35.2018	0.448703	-6.63483	0.449832	0.779874	0.99785	0.9984	0.9995	0.992541	0.996306	0.995243	-0.0005	59.0614	62.1908	0.552122	-0.0743611	28.3493	25.4165	0.237757	0.15696
Higher RPS in Berkshire	9	53400753	ENSSSCG00000015231	DCPS	18.212	17.331	0.0332583	0.88092	Active	149.377	110.334	0.575167	53510000	53515000	Less activity	20.2664	21.4476	0.785071	-1.18121	0.741466	0.872472	0.99785	0.9984	0.9995	0.991835	0.993518	0.997399	-0.000542857	59.0614	62.1908	0.552122	-0.0743611	34.2583	31.1845	0.444357	0.135208
Higher RPS in Berkshire	9	53400753	ENSSSCG00000015231	DCPS	18.212	17.331	0.0332583	0.88092	Active	149.377	110.334	0.575167	53525000	53530000	Less activity	22.0269	13.3931	0.0878104	8.6338	0.949186	0.564204	0.99785	0.9984	0.9995	0.99441	0.992621	1	-0.000695833	59.0614	62.1908	0.552122	-0.0743611	21.5567	25.9297	0.365404	-0.265348
Higher RPS in Berkshire	9	53400753	ENSSSCG00000015231	DCPS	18.212	17.331	0.0332583	0.88092	Active	149.377	110.334	0.575167	53530000	53535000	Less activity	21.964	17.7573	0.186508	4.20672	0.891334	0.733248	0.99785	0.9984	0.9995	0.990514	0.989097	1	-0.000678	59.0614	62.1908	0.552122	-0.0743611	23.4048	27.8883	0.303419	-0.251869
Higher RPS in Berkshire	9	53400753	ENSSSCG00000015231	DCPS	18.212	17.331	0.0332583	0.88092	Active	149.377	110.334	0.575167	53535000	53540000	Less activity	23.3884	12.7227	0.0234815	10.6657	0.870347	0.748863	0.99785	0.9984	0.9995	0.9925	0.9964	1	-0.000580769	59.0614	62.1908	0.552122	-0.0743611	38.6903	40.3158	0.149169	-0.0592253
Higher RPS in Berkshire	9	53400753	ENSSSCG00000015231	DCPS	18.212	17.331	0.0332583	0.88092	Active	149.377	110.334	0.575167	53545000	53550000	Less activity	30.2509	17.1407	0.174345	13.1102	0.802201	0.895823	0.99785	0.9984	0.9995	0.986353	0.991035	0.9998	-0.000480357	59.0614	62.1908	0.552122	-0.0743611	29.6238	33.0064	0.362783	-0.155495
Higher RPS in Berkshire	9	66025856	ENSSSCG00000023441	KLHDC8A	11.6426	10.613	0.0469487	1.02958	Active	0.358824	0.707743	0.336429	66135000	66140000	Less activity	23.0106	14.6701	0.0579954	8.34052	0.508601	0.593938	0.997051	0.996101	0.999733	0.962725	0.955892	0.9996	0.00736905	47.5072	49.0489	0.863919	-0.0459801	25.0005	28.0442	0.320675	-0.165121
Higher RPS in Berkshire	9	66025856	ENSSSCG00000023441	KLHDC8A	11.6426	10.613	0.0469487	1.02958	Active	0.358824	0.707743	0.336429	66140000	66145000	Less activity	25.9407	17.7272	0.332683	8.21349	0.629105	0.70092	0.997051	0.996101	0.999733	0.989355	0.995684	0.9999	0.00569091	47.5072	49.0489	0.863919	-0.0459801	21.226	23.788	0.481575	-0.163672
Higher RPS in Berkshire	9	66025856	ENSSSCG00000023441	KLHDC8A	11.6426	10.613	0.0469487	1.02958	Active	0.358824	0.707743	0.336429	66145000	66150000	Less activity	34.1295	32.0315	0.820538	2.09805	0.558479	0.450693	0.997051	0.996101	0.999733	0.969476	0.975299	0.966913	0.00563913	47.5072	49.0489	0.863919	-0.0459801	24.267	28.5993	0.579581	-0.236087
Higher RPS in Berkshire	9	66025856	ENSSSCG00000023441	KLHDC8A	11.6426	10.613	0.0469487	1.02958	Active	0.358824	0.707743	0.336429	66150000	66155000	Less activity	44.1733	43.7746	0.944449	0.39869	0.832671	0.537348	0.997051	0.996101	0.999733	0.989669	0.98995	0.993614	0.00494583	47.5072	49.0489	0.863919	-0.0459801	29.1858	31.0008	0.829237	-0.0867504
Higher RPS in Berkshire	9	66025856	ENSSSCG00000023441	KLHDC8A	11.6426	10.613	0.0469487	1.02958	Active	0.358824	0.707743	0.336429	66155000	66160000	Moderate activity	38.6066	25.1696	0.0196926	13.437	0.871773	0.608664	0.997051	0.996101	0.999733	0.994246	0.995464	0.995632	0.004854	47.5072	49.0489	0.863919	-0.0459801	24.1191	23.5256	0.825001	0.0357928
Higher RPS in Berkshire	9	66025856	ENSSSCG00000023441	KLHDC8A	11.6426	10.613	0.0469487	1.02958	Active	0.358824	0.707743	0.336429	66160000	66165000	Moderate activity	29.6253	20.2498	0.202	9.37544	0.643452	0.633684	0.997051	0.996101	0.999733	0.995859	0.992988	0.999867	0.00468269	47.5072	49.0489	0.863919	-0.0459801	47.4091	46.5277	0.859328	0.0270158
Higher RPS in Berkshire	9	66025856	ENSSSCG00000023441	KLHDC8A	11.6426	10.613	0.0469487	1.02958	Active	0.358824	0.707743	0.336429	66185000	66190000	Less activity	20.4123	11.679	0.107937	8.73331	0.752406	0.738146	0.997051	0.996101	0.999733	0.995599	0.9954	0.997867	0.00210806	47.5072	49.0489	0.863919	-0.0459801	75.3984	77.3831	0.831052	-0.0374351
Higher RPS in Berkshire	9	66025856	ENSSSCG00000023441	KLHDC8A	11.6426	10.613	0.0469487	1.02958	Active	0.358824	0.707743	0.336429	66190000	66195000	Less activity	24.3025	18.0178	0.259655	6.28477	0.648229	0.500568	0.997051	0.996101	0.999733	0.958607	0.955842	0.999367	0.00207031	47.5072	49.0489	0.863919	-0.0459801	33.4332	34.9448	0.360687	-0.0636092
Higher RPS in Berkshire	9	66127668	ENSSSCG00000015291	LEMD1	1.43306	1.05785	0.0206841	0.37521	Active	0.0139312	0.0139312	-	66015000	66020000	Less activity	26.4883	10.9848	0.0148358	15.5036	0.377891	0.729035	0.944346	0.997104	0.929361	0.979031	0.998737	0.999077	0.00459286	33.5296	34.4676	0.800814	-0.0396893	30.4582	35.804	0.0374799	-0.232586
Higher RPS in Berkshire	9	66838563	ENSSSCG00000039370	FAM72A	19.9315	18.5773	0.0199945	1.3542	Active	13.1541	13.5361	0.492845	66940000	66945000	Less activity	25.7899	17.3258	0.196111	8.4641	0.549994	0.772861	0.99985	0.999767	1	0.994302	0.991667	0.999467	0.000755	28.9915	28.3432	0.912686	0.0325114	66.4412	67.4268	0.673871	-0.0212118
Higher RPS in Berkshire	9	66838563	ENSSSCG00000039370	FAM72A	19.9315	18.5773	0.0199945	1.3542	Active	13.1541	13.5361	0.492845	66950000	66955000	Less activity	21.9092	17.6803	0.161685	4.22895	0.578292	0.277828	0.99985	0.999767	1	0.98488	0.996517	0.997768	0.000822727	28.9915	28.3432	0.912686	0.0325114	55.777	55.6513	0.967529	0.00324912
Higher RPS in Berkshire	9	66838563	ENSSSCG00000039370	FAM72A	19.9315	18.5773	0.0199945	1.3542	Active	13.1541	13.5361	0.492845	66955000	66960000	Less activity	26.5676	15.5961	0.0118493	10.9715	0.602007	0.310093	0.99985	0.999767	1	0.993006	0.995003	0.999467	0.000586957	28.9915	28.3432	0.912686	0.0325114	51.7672	51.596	0.970511	0.00477262
Higher RPS in Berkshire	9	66838563	ENSSSCG00000039370	FAM72A	19.9315	18.5773	0.0199945	1.3542	Active	13.1541	13.5361	0.492845	67010000	67015000	Less activity	29.1157	13.9115	0.0725011	15.2042	0.566728	0.303468	0.99985	0.999767	1	0.996401	0.997068	0.999867	0.00114706	28.9915	28.3432	0.912686	0.0325114	14.71	10.5437	0.0366614	0.476576
Higher RPS in Berkshire	9	66838563	ENSSSCG00000039370	FAM72A	19.9315	18.5773	0.0199945	1.3542	Active	13.1541	13.5361	0.492845	67015000	67020000	Less activity	29.2497	24.6679	0.373116	4.58175	0.886392	0.702395	0.99985	0.999767	1	0.99735	0.998566	1	0.00113714	28.9915	28.3432	0.912686	0.0325114	20.7878	18.5993	0.674769	0.159681
Higher RPS in Berkshire	9	66838563	ENSSSCG00000039370	FAM72A	19.9315	18.5773	0.0199945	1.3542	Active	13.1541	13.5361	0.492845	67020000	67025000	Less activity	29.3519	32.7527	0.663182	-3.40079	0.971462	0.900841	0.99985	0.999767	1	0.994603	0.998801	1	0.001125	28.9915	28.3432	0.912686	0.0325114	170.654	172.412	0.728555	-0.0147771
Higher RPS in Berkshire	9	66838563	ENSSSCG00000039370	FAM72A	19.9315	18.5773	0.0199945	1.3542	Active	13.1541	13.5361	0.492845	67025000	67030000	Moderate activity	28.5019	29.2719	0.888763	-0.76999	0.742221	0.427118	0.99985	0.999767	1	0.996551	0.99557	1	0.00108378	28.9915	28.3432	0.912686	0.0325114	20.1295	17.0678	0.400193	0.236751
Higher RPS in Berkshire	9	66838563	ENSSSCG00000039370	FAM72A	19.9315	18.5773	0.0199945	1.3542	Active	13.1541	13.5361	0.492845	67030000	67035000	Moderate activity	22.0534	25.0036	0.273476	-2.95024	0.589103	0.541892	0.99985	0.999767	1	0.986273	0.993156	0.999733	0.00106447	28.9915	28.3432	0.912686	0.0325114	37.0166	39.6521	0.155942	-0.0989646
Higher RPS in Berkshire	9	66838563	ENSSSCG00000039370	FAM72A	19.9315	18.5773	0.0199945	1.3542	Active	13.1541	13.5361	0.492845	67035000	67040000	Moderate activity	24.1932	22.5878	0.582383	1.6054	0.830051	0.424097	0.99985	0.999767	1	0.990057	0.990467	0.9999	0.00113718	28.9915	28.3432	0.912686	0.0325114	39.4386	36.8309	0.0796762	0.0984315
Higher RPS in Berkshire	9	66838563	ENSSSCG00000039370	FAM72A	19.9315	18.5773	0.0199945	1.3542	Active	13.1541	13.5361	0.492845	67040000	67045000	Moderate activity	23.6163	15.7214	0.00326211	7.89493	0.866591	0.470334	0.99985	0.999767	1	0.992564	0.992723	0.999733	0.0011225	28.9915	28.3432	0.912686	0.0325114	32.5113	31.506	0.762464	0.0451757
Higher RPS in Berkshire	9	66838563	ENSSSCG00000039370	FAM72A	19.9315	18.5773	0.0199945	1.3542	Active	13.1541	13.5361	0.492845	67045000	67050000	Moderate activity	24.8009	24.2845	0.88652	0.516382	0.858214	0.365686	0.99985	0.999767	1	0.995701	0.9952	0.999867	0.00106341	28.9915	28.3432	0.912686	0.0325114	31.6197	33.6793	0.254966	-0.0907636
Higher RPS in Berkshire	9	66838563	ENSSSCG00000039370	FAM72A	19.9315	18.5773	0.0199945	1.3542	Active	13.1541	13.5361	0.492845	67050000	67055000	Moderate activity	27.2918	20.2759	0.381108	7.01591	0.774833	0.495849	0.99985	0.999767	1	0.99175	0.99342	1	0.00104762	28.9915	28.3432	0.912686	0.0325114	43.2789	36.6198	0.304476	0.240435
Higher RPS in Berkshire	9	66838563	ENSSSCG00000039370	FAM72A	19.9315	18.5773	0.0199945	1.3542	Active	13.1541	13.5361	0.492845	67055000	67060000	Less activity	23.1341	23.3505	0.970379	-0.216397	0.692942	0.546254	0.99985	0.999767	1	0.990577	0.986375	1	0.0010907	28.9915	28.3432	0.912686	0.0325114	21.716	16.9834	0.0829447	0.352792
Higher RPS in Berkshire	9	66838563	ENSSSCG00000039370	FAM72A	19.9315	18.5773	0.0199945	1.3542	Active	13.1541	13.5361	0.492845	67065000	67070000	Less activity	27.4677	19.1682	0.103104	8.2995	0.780279	0.753654	0.99985	0.999767	1	0.961109	0.997666	0.96393	0.00110444	28.9915	28.3432	0.912686	0.0325114	42.2738	38.8894	0.531852	0.12009
Higher RPS in Berkshire	9	66838123	ENSSSCG00000015645	SRGAP2B	19.9315	18.5773	0.0199945	1.3542	Active	4.41603	4.92871	0.472569	66940000	66945000	Less activity	25.7899	17.3258	0.196111	8.4641	0.896885	0.170959	0.99985	0.999767	1	0.994302	0.991667	0.999467	0.000755	28.9915	28.3432	0.912686	0.0325114	66.4412	67.4268	0.673871	-0.0212118
Higher RPS in Berkshire	9	66838123	ENSSSCG00000015645	SRGAP2B	19.9315	18.5773	0.0199945	1.3542	Active	4.41603	4.92871	0.472569	66950000	66955000	Less activity	21.9092	17.6803	0.161685	4.22895	0.680195	0.0974648	0.99985	0.999767	1	0.98488	0.996517	0.997768	0.000822727	28.9915	28.3432	0.912686	0.0325114	55.777	55.6513	0.967529	0.00324912
Higher RPS in Berkshire	9	66838123	ENSSSCG00000015645	SRGAP2B	19.9315	18.5773	0.0199945	1.3542	Active	4.41603	4.92871	0.472569	66955000	66960000	Less activity	26.5676	15.5961	0.0118493	10.9715	0.230992	0.260932	0.99985	0.999767	1	0.993006	0.995003	0.999467	0.000586957	28.9915	28.3432	0.912686	0.0325114	51.7672	51.596	0.970511	0.00477262
Higher RPS in Berkshire	9	66838123	ENSSSCG00000015645	SRGAP2B	19.9315	18.5773	0.0199945	1.3542	Active	4.41603	4.92871	0.472569	67010000	67015000	Less activity	29.1157	13.9115	0.0725011	15.2042	0.653078	0.130003	0.99985	0.999767	1	0.996401	0.997068	0.999867	0.00114706	28.9915	28.3432	0.912686	0.0325114	14.71	10.5437	0.0366614	0.476576
Higher RPS in Berkshire	9	66838123	ENSSSCG00000015645	SRGAP2B	19.9315	18.5773	0.0199945	1.3542	Active	4.41603	4.92871	0.472569	67015000	67020000	Less activity	29.2497	24.6679	0.373116	4.58175	0.866204	0.438623	0.99985	0.999767	1	0.99735	0.998566	1	0.00113714	28.9915	28.3432	0.912686	0.0325114	20.7878	18.5993	0.674769	0.159681
Higher RPS in Berkshire	9	66838123	ENSSSCG00000015645	SRGAP2B	19.9315	18.5773	0.0199945	1.3542	Active	4.41603	4.92871	0.472569	67020000	67025000	Less activity	29.3519	32.7527	0.663182	-3.40079	0.501987	0.404411	0.99985	0.999767	1	0.994603	0.998801	1	0.001125	28.9915	28.3432	0.912686	0.0325114	170.654	172.412	0.728555	-0.0147771
Higher RPS in Berkshire	9	66838123	ENSSSCG00000015645	SRGAP2B	19.9315	18.5773	0.0199945	1.3542	Active	4.41603	4.92871	0.472569	67025000	67030000	Moderate activity	28.5019	29.2719	0.888763	-0.76999	0.574576	0.497363	0.99985	0.999767	1	0.996551	0.99557	1	0.00108378	28.9915	28.3432	0.912686	0.0325114	20.1295	17.0678	0.400193	0.236751
Higher RPS in Berkshire	9	66838123	ENSSSCG00000015645	SRGAP2B	19.9315	18.5773	0.0199945	1.3542	Active	4.41603	4.92871	0.472569	67030000	67035000	Moderate activity	22.0534	25.0036	0.273476	-2.95024	0.722314	0.339527	0.99985	0.999767	1	0.986273	0.993156	0.999733	0.00106447	28.9915	28.3432	0.912686	0.0325114	37.0166	39.6521	0.155942	-0.0989646
Higher RPS in Berkshire	9	66838123	ENSSSCG00000015645	SRGAP2B	19.9315	18.5773	0.0199945	1.3542	Active	4.41603	4.92871	0.472569	67035000	67040000	Moderate activity	24.1932	22.5878	0.582383	1.6054	0.716834	0.452436	0.99985	0.999767	1	0.990057	0.990467	0.9999	0.00113718	28.9915	28.3432	0.912686	0.0325114	39.4386	36.8309	0.0796762	0.0984315
Higher RPS in Berkshire	9	66838123	ENSSSCG00000015645	SRGAP2B	19.9315	18.5773	0.0199945	1.3542	Active	4.41603	4.92871	0.472569	67040000	67045000	Moderate activity	23.6163	15.7214	0.00326211	7.89493	0.509547	0.0796633	0.99985	0.999767	1	0.992564	0.992723	0.999733	0.0011225	28.9915	28.3432	0.912686	0.0325114	32.5113	31.506	0.762464	0.0451757
Higher RPS in Berkshire	9	66838123	ENSSSCG00000015645	SRGAP2B	19.9315	18.5773	0.0199945	1.3542	Active	4.41603	4.92871	0.472569	67045000	67050000	Moderate activity	24.8009	24.2845	0.88652	0.516382	0.519596	0.0186217	0.99985	0.999767	1	0.995701	0.9952	0.999867	0.00106341	28.9915	28.3432	0.912686	0.0325114	31.6197	33.6793	0.254966	-0.0907636
Higher RPS in Berkshire	9	66838123	ENSSSCG00000015645	SRGAP2B	19.9315	18.5773	0.0199945	1.3542	Active	4.41603	4.92871	0.472569	67050000	67055000	Moderate activity	27.2918	20.2759	0.381108	7.01591	0.718196	0.237549	0.99985	0.999767	1	0.99175	0.99342	1	0.00104762	28.9915	28.3432	0.912686	0.0325114	43.2789	36.6198	0.304476	0.240435
Higher RPS in Berkshire	9	66838123	ENSSSCG00000015645	SRGAP2B	19.9315	18.5773	0.0199945	1.3542	Active	4.41603	4.92871	0.472569	67055000	67060000	Less activity	23.1341	23.3505	0.970379	-0.216397	0.762487	0.0792809	0.99985	0.999767	1	0.990577	0.986375	1	0.0010907	28.9915	28.3432	0.912686	0.0325114	21.716	16.9834	0.0829447	0.352792
Higher RPS in Berkshire	9	66838123	ENSSSCG00000015645	SRGAP2B	19.9315	18.5773	0.0199945	1.3542	Active	4.41603	4.92871	0.472569	67065000	67070000	Less activity	27.4677	19.1682	0.103104	8.2995	0.766922	0.175854	0.99985	0.999767	1	0.961109	0.997666	0.96393	0.00110444	28.9915	28.3432	0.912686	0.0325114	42.2738	38.8894	0.531852	0.12009
Higher RPS in Berkshire	9	67116530	ENSSSCG00000037428	Unknown	7.03652	6.01116	0.0044955	1.02536	Inactive	0	0	-	66795000	66800000	Less activity	24.4396	15.7215	0.00751327	8.71811	0.462809	0.486454	0.995701	0.994534	1	0.984437	0.997002	0.998002	0.00205317	14.8238	15.9264	0.739824	-0.102831	27.7495	28.4475	0.829187	-0.0357117
Higher RPS in Berkshire	9	67116530	ENSSSCG00000037428	Unknown	7.03652	6.01116	0.0044955	1.02536	Inactive	0	0	-	66800000	66805000	Less activity	25.0045	30.4116	0.446986	-5.4071	0.638566	0.772212	0.995701	0.994534	1	0.970679	0.970299	0.995774	0.00230887	14.8238	15.9264	0.739824	-0.102831	30.2589	31.2152	0.78637	-0.0447424
Higher RPS in Berkshire	9	67116530	ENSSSCG00000037428	Unknown	7.03652	6.01116	0.0044955	1.02536	Inactive	0	0	-	66805000	66810000	Less activity	29.7335	26.1744	0.515932	3.55909	0.706621	0.732603	0.995701	0.994534	1	0.991975	0.999069	0.999634	0.00235574	14.8238	15.9264	0.739824	-0.102831	23.7974	28.01	0.112771	-0.23423
Higher RPS in Berkshire	9	67116530	ENSSSCG00000037428	Unknown	7.03652	6.01116	0.0044955	1.02536	Inactive	0	0	-	66810000	66815000	Less activity	24.4854	21.8485	0.547215	2.63692	0.773378	0.573045	0.995701	0.994534	1	0.970496	0.999772	0.999867	0.00280333	14.8238	15.9264	0.739824	-0.102831	19.2225	20.4531	0.544698	-0.0890689
Higher RPS in Berkshire	9	67116530	ENSSSCG00000037428	Unknown	7.03652	6.01116	0.0044955	1.02536	Inactive	0	0	-	66825000	66830000	Less activity	22.0985	3.99597	0.0140213	18.1025	0.505298	0.70467	0.995701	0.994534	1	0.987922	0.999268	1	0.00297193	14.8238	15.9264	0.739824	-0.102831	31.2297	26.5023	0.337743	0.235984
Higher RPS in Berkshire	9	81518228	ENSSSCG00000015350	THSD7A	2.78711	2.44469	0.00948619	0.342419	Active	2.16595	1.84904	0.539466	81760000	81765000	Less activity	22.94	15.2809	0.0162078	7.65906	0.804567	0.791174	0.996101	0.997568	0.9993	0.989665	0.995806	0.999099	-0.00341146	94.0833	105.006	0.214727	-0.158297	21.7583	19.5395	0.286377	0.154423
Higher RPS in Berkshire	9	81518228	ENSSSCG00000015350	THSD7A	2.78711	2.44469	0.00948619	0.342419	Active	2.16595	1.84904	0.539466	81765000	81770000	Less activity	26.4211	17.8624	0.0839871	8.5587	0.865255	0.951762	0.996101	0.997568	0.9993	0.976086	0.986497	0.998162	-0.00335306	94.0833	105.006	0.214727	-0.158297	20.8889	22.9351	0.495742	-0.134204
Higher RPS in Berkshire	9	113489877	ENSSSCG00000044037	OR2A2	3.85087	3.43825	0.0324005	0.412619	Inactive	0	0	-	113355000	113360000	Moderate activity	29.4168	21.9543	0.399184	7.46248	0.333097	0.225682	0.996002	0.999566	0.9997	0.993574	0.993419	0.995347	-0.003378	15.9758	13.9251	0.398564	0.19688	17.3003	15.27	0.392632	0.178996
Higher RPS in Berkshire	9	113489877	ENSSSCG00000044037	OR2A2	3.85087	3.43825	0.0324005	0.412619	Inactive	0	0	-	113360000	113365000	Moderate activity	22.7295	18.8746	0.472563	3.85484	0.585212	0.385534	0.996002	0.999566	0.9997	0.987426	0.988792	0.9998	-0.00349167	15.9758	13.9251	0.398564	0.19688	42.6367	44.929	0.847314	-0.0753797
Higher RPS in Berkshire	9	113489877	ENSSSCG00000044037	OR2A2	3.85087	3.43825	0.0324005	0.412619	Inactive	0	0	-	113425000	113430000	Less activity	18.7332	8.81664	0.0731909	9.91651	0.898223	0.406213	0.996002	0.999566	0.9997	0.99935	0.9997	1	-0.0182182	15.9758	13.9251	0.398564	0.19688	2.55434	3.26609	0.567927	-0.342722
Higher RPS in Berkshire	9	119292465	ENSSSCG00000049756	Unknown	10.016	5.77896	0.0350566	4.23707	Inactive	0.234512	0.234512	-	119315000	119320000	Less activity	40.7487	30.3766	0.687502	10.3721	0.380628	0.555282	0.992574	0.993567	0.996932	0.997177	0.997412	0.999294	-0.0015	25.1064	17.5728	0.0368855	0.512254	2.94171	3.41748	0.617432	-0.209658
Higher RPS in Berkshire	9	119292465	ENSSSCG00000049756	Unknown	10.016	5.77896	0.0350566	4.23707	Inactive	0.234512	0.234512	-	119340000	119345000	Less activity	14.8265	7.13114	0.621712	7.69535	0.664447	0.116408	0.992574	0.993567	0.996932	0.996925	0.995933	0.9968	-0.000688889	25.1064	17.5728	0.0368855	0.512254	3.47772	2.21301	0.391002	0.629273
Higher RPS in Berkshire	9	119292465	ENSSSCG00000049756	Unknown	10.016	5.77896	0.0350566	4.23707	Inactive	0.234512	0.234512	-	119345000	119350000	Less activity	33.8565	6.02299	0.163539	27.8335	0.855152	0.523085	0.992574	0.993567	0.996932	0.99254	0.991917	0.995642	-0.000585	25.1064	17.5728	0.0368855	0.512254	17.1847	17.1525	0.992745	0.00269284
Higher RPS in Berkshire	9	119292465	ENSSSCG00000049756	Unknown	10.016	5.77896	0.0350566	4.23707	Inactive	0.234512	0.234512	-	119350000	119355000	Less activity	31.9543	5.69932	0.0730355	26.255	0.8224	0.537339	0.992574	0.993567	0.996932	0.991904	0.988802	0.997189	-0.000477273	25.1064	17.5728	0.0368855	0.512254	13.279	14.1735	0.411345	-0.0933738
Higher RPS in Berkshire	9	119292465	ENSSSCG00000049756	Unknown	10.016	5.77896	0.0350566	4.23707	Inactive	0.234512	0.234512	-	119355000	119360000	Less activity	24.8567	2.66933	0.0444714	22.1873	0.76969	0.410017	0.992574	0.993567	0.996932	0.991304	0.991926	0.996158	-0.000520833	25.1064	17.5728	0.0368855	0.512254	14.548	18.2801	0.313186	-0.327435
Higher RPS in Berkshire	9	119292465	ENSSSCG00000049756	Unknown	10.016	5.77896	0.0350566	4.23707	Inactive	0.234512	0.234512	-	119360000	119365000	Less activity	21.2571	7.01684	0.0378633	14.2403	0.62503	0.510022	0.992574	0.993567	0.996932	0.994116	0.99475	0.998603	-0.000396154	25.1064	17.5728	0.0368855	0.512254	19.1842	19.9572	0.749724	-0.0566987
Higher RPS in Berkshire	9	119292465	ENSSSCG00000049756	Unknown	10.016	5.77896	0.0350566	4.23707	Inactive	0.234512	0.234512	-	119365000	119370000	Less activity	24.3879	3.25299	0.0125074	21.1349	0.836903	0.304853	0.992574	0.993567	0.996932	0.991196	0.990139	0.993663	-0.000417857	25.1064	17.5728	0.0368855	0.512254	14.5723	15.707	0.573685	-0.107464
Higher RPS in Berkshire	9	119292465	ENSSSCG00000049756	Unknown	10.016	5.77896	0.0350566	4.23707	Inactive	0.234512	0.234512	-	119475000	119480000	Less activity	17.8845	21.7747	0.334727	-3.89018	0.955493	0.304115	0.992574	0.993567	0.996932	0.979994	0.961616	0.999767	-0.0009	25.1064	17.5728	0.0368855	0.512254	12.0954	10.727	0.652904	0.171704
Higher RPS in Berkshire	9	136571197	ENSSSCG00000022009	DDC	1.3125	0.939695	0.0145173	0.372806	Active	48.8273	43.2116	0.530507	136505000	136510000	Moderate activity	20.2237	8.45633	0.0115348	11.7674	0.32278	0.345243	0.988857	0.98776	0.992007	0.987379	0.984216	0.992136	-0.00318333	312.841	325.516	0.782292	-0.057283	77.412	33.5208	0.128748	1.20507
Higher RPS in Berkshire	8	334599	ENSSSCG00000032262	IDUA	1.68555	0.157337	0.000396381	1.52821	Active	7.2208	7.68982	0.484272	245000	250000	Less activity	55.8301	0.814848	0.0551904	55.0152	0.355135	0.575925	0.996653	0.998168	0.997702	0.994452	0.997199	0.997702	0.0002625	129.447	120.479	0.137498	0.103489	30.7006	31.6965	0.664146	-0.0459083
Higher RPS in Berkshire	8	495984	ENSSSCG00000031302	CTBP1	7.5595	6.65605	0.0372645	0.903443	Active	32.0793	29.3598	0.522131	560000	565000	Less activity	41.789	21.8524	0.157291	19.9365	0.590908	0.727055	0.995185	0.997072	0.99797	0.98923	0.994357	0.998101	0.00122917	149.266	142.081	0.34345	0.0711208	54.0177	44.9823	0.301413	0.263539
Higher RPS in Berkshire	8	495984	ENSSSCG00000031302	CTBP1	7.5595	6.65605	0.0372645	0.903443	Active	32.0793	29.3598	0.522131	565000	570000	Less activity	62.5896	43.7845	0.359059	18.8051	0.612994	0.511889	0.995185	0.997072	0.99797	0.981147	0.988196	0.987053	0.00125385	149.266	142.081	0.34345	0.0711208	99.1523	94.5149	0.69378	0.0690339
Higher RPS in Berkshire	8	495984	ENSSSCG00000031302	CTBP1	7.5595	6.65605	0.0372645	0.903443	Active	32.0793	29.3598	0.522131	575000	580000	Less activity	40.0503	31.3899	0.324249	8.66034	0.251859	0.863646	0.995185	0.997072	0.99797	0.985565	0.987936	0.994475	0.000476667	149.266	142.081	0.34345	0.0711208	52.1515	48.6042	0.321497	0.101427
Higher RPS in Berkshire	8	495984	ENSSSCG00000031302	CTBP1	7.5595	6.65605	0.0372645	0.903443	Active	32.0793	29.3598	0.522131	585000	590000	Less activity	31.3416	11.715	0.226859	19.6265	0.356982	0.624286	0.995185	0.997072	0.99797	0.99013	0.994747	0.996311	0.00132353	149.266	142.081	0.34345	0.0711208	50.1718	45.6492	0.314412	0.136004
Higher RPS in Berkshire	8	495984	ENSSSCG00000031302	CTBP1	7.5595	6.65605	0.0372645	0.903443	Active	32.0793	29.3598	0.522131	745000	750000	Less activity	18.4526	21.7391	0.857526	-3.28652	0.785855	0.449765	0.995185	0.997072	0.99797	0.992507	0.99617	0.998701	0.00276633	149.266	142.081	0.34345	0.0711208	25.1236	27.1019	0.26123	-0.108933
Higher RPS in Berkshire	8	11317312	ENSSSCG00000008745	PROM1	10.4287	9.25315	0.0304354	1.17557	Active	7.44776	2.39276	0.756846	11390000	11395000	Moderate activity	20.5763	16.2768	0.595886	4.29951	0.639515	0.672706	0.9833	0.987561	0.996199	0.990394	1	1	-0.00356429	383.922	297.164	0.0132262	0.369444	39.5	39.034	0.832494	0.0170769
Higher RPS in Berkshire	8	11317312	ENSSSCG00000008745	PROM1	10.4287	9.25315	0.0304354	1.17557	Active	7.44776	2.39276	0.756846	11395000	11400000	Less activity	19.4162	18.7064	0.900619	0.70976	0.405083	0.396095	0.9833	0.987561	0.996199	0.987507	0.999699	0.9999	-0.00336667	383.922	297.164	0.0132262	0.369444	47.8588	48.9085	0.806359	-0.0312365
Higher RPS in Berkshire	8	11317312	ENSSSCG00000008745	PROM1	10.4287	9.25315	0.0304354	1.17557	Active	7.44776	2.39276	0.756846	11405000	11410000	Less activity	22.8235	11.0387	0.268123	11.7848	0.737496	0.458226	0.9833	0.987561	0.996199	0.984082	0.9994	0.9997	-0.00405	383.922	297.164	0.0132262	0.369444	160.654	149.486	0.424441	0.103878
Higher RPS in Berkshire	8	11317312	ENSSSCG00000008745	PROM1	10.4287	9.25315	0.0304354	1.17557	Active	7.44776	2.39276	0.756846	11410000	11415000	Less activity	23.9773	23.3189	0.914952	0.658392	0.576489	0.546925	0.9833	0.987561	0.996199	0.986454	0.996699	0.999265	-0.00379167	383.922	297.164	0.0132262	0.369444	228.529	309.492	0.0471209	-0.437361
Higher RPS in Berkshire	8	11317312	ENSSSCG00000008745	PROM1	10.4287	9.25315	0.0304354	1.17557	Active	7.44776	2.39276	0.756846	11420000	11425000	Less activity	20.4832	14.7805	0.442527	5.70269	0.364042	0.257614	0.9833	0.987561	0.996199	0.982471	0.985633	0.997357	-0.0033025	383.922	297.164	0.0132262	0.369444	21.7574	28.0121	0.158927	-0.363066
Higher RPS in Berkshire	8	11317312	ENSSSCG00000008745	PROM1	10.4287	9.25315	0.0304354	1.17557	Active	7.44776	2.39276	0.756846	11445000	11450000	Less activity	22.1534	19.9403	0.613241	2.21305	0.659578	0.435982	0.9833	0.987561	0.996199	0.988384	0.982981	1	-0.00262	383.922	297.164	0.0132262	0.369444	23.6699	19.3429	0.0196837	0.289891
Higher RPS in Berkshire	8	11317312	ENSSSCG00000008745	PROM1	10.4287	9.25315	0.0304354	1.17557	Active	7.44776	2.39276	0.756846	11455000	11460000	Moderate activity	21.0316	17.2415	0.465442	3.79018	0.618582	0.860118	0.9833	0.987561	0.996199	0.989472	0.985179	0.9999	-0.0109333	383.922	297.164	0.0132262	0.369444	36.051	25.4019	0.132435	0.503428
Higher RPS in Berkshire	8	11317312	ENSSSCG00000008745	PROM1	10.4287	9.25315	0.0304354	1.17557	Active	7.44776	2.39276	0.756846	11460000	11465000	Moderate activity	19.0593	13.6917	0.38025	5.36755	0.431398	0.721395	0.9833	0.987561	0.996199	0.985911	0.984246	0.9995	-0.0105179	383.922	297.164	0.0132262	0.369444	32.2828	30.4364	0.70321	0.0846989
Higher RPS in Berkshire	8	12759639	ENSSSCG00000008747	NCAPG	4.33115	3.95302	0.00238453	0.378127	Active	43.5246	42.0753	0.508466	12565000	12570000	Less activity	20.318	14.0187	0.100014	6.29938	0.450207	0.290626	0.964995	0.950925	0.972191	0.979268	0.991004	0.971635	-0.00485541	17.484	12.554	0.20482	0.474662	30.5257	23.5069	0.181751	0.375536
Higher RPS in Berkshire	8	12759639	ENSSSCG00000008747	NCAPG	4.33115	3.95302	0.00238453	0.378127	Active	43.5246	42.0753	0.508466	12570000	12575000	Less activity	32.4771	19.5573	0.0175527	12.9198	0.299969	0.4872	0.964995	0.950925	0.972191	0.931834	0.945623	0.9961	-0.0056375	17.484	12.554	0.20482	0.474662	27.4674	20.0493	0.282144	0.452236
Higher RPS in Berkshire	8	12759639	ENSSSCG00000008747	NCAPG	4.33115	3.95302	0.00238453	0.378127	Active	43.5246	42.0753	0.508466	12575000	12580000	Moderate activity	31.0541	31.4644	0.946328	-0.410238	0.557098	0.639133	0.964995	0.950925	0.972191	0.986421	0.991696	0.992016	-0.00577	17.484	12.554	0.20482	0.474662	44.3932	30.726	0.0614784	0.529438
Higher RPS in Berkshire	8	32353246	ENSSSCG00000022945	UCHL1	9.64694	9.19498	0.0311652	0.45196	Inactive	1.88081	3.0342	0.382666	32725000	32730000	Moderate activity	19.667	15.8043	0.453879	3.86266	0.843477	0.73857	0.996578	0.996968	0.996305	0.995224	0.9948	0.997199	0.000751351	53.7143	61.7374	0.351544	-0.200491	25.665	28.5281	0.318105	-0.152019
Higher RPS in Berkshire	8	32353246	ENSSSCG00000022945	UCHL1	9.64694	9.19498	0.0311652	0.45196	Inactive	1.88081	3.0342	0.382666	32730000	32735000	Less activity	16.8252	20.9986	0.417137	-4.17342	0.935488	0.323382	0.996578	0.996968	0.996305	0.984554	0.989677	0.993379	0.000744	53.7143	61.7374	0.351544	-0.200491	28.8549	32.1235	0.118998	-0.154306
Higher RPS in Berkshire	8	32353246	ENSSSCG00000022945	UCHL1	9.64694	9.19498	0.0311652	0.45196	Inactive	1.88081	3.0342	0.382666	32735000	32740000	Less activity	20.1955	18.3157	0.672173	1.87978	0.744901	0.432687	0.996578	0.996968	0.996305	0.986036	0.992054	0.99404	0.000788816	53.7143	61.7374	0.351544	-0.200491	35.7507	35.6642	0.964792	0.0034831
Higher RPS in Berkshire	8	32353246	ENSSSCG00000022945	UCHL1	9.64694	9.19498	0.0311652	0.45196	Inactive	1.88081	3.0342	0.382666	32745000	32750000	Less activity	26.6367	26.064	0.88667	0.57271	0.600792	0.436023	0.996578	0.996968	0.996305	0.985596	0.989464	0.986591	0.000740385	53.7143	61.7374	0.351544	-0.200491	32.2155	29.3421	0.378834	0.134347
Higher RPS in Berkshire	8	32353246	ENSSSCG00000022945	UCHL1	9.64694	9.19498	0.0311652	0.45196	Inactive	1.88081	3.0342	0.382666	32750000	32755000	Less activity	25.3877	20.5542	0.114118	4.83351	0.841747	0.651866	0.996578	0.996968	0.996305	0.992617	0.993942	0.994646	0.000686076	53.7143	61.7374	0.351544	-0.200491	15.5404	15.6196	0.969055	-0.0072917
Higher RPS in Berkshire	8	32353246	ENSSSCG00000022945	UCHL1	9.64694	9.19498	0.0311652	0.45196	Inactive	1.88081	3.0342	0.382666	32755000	32760000	Less activity	26.9956	24.5953	0.603525	2.40027	0.983328	0.571679	0.996578	0.996968	0.996305	0.967079	0.96206	0.993236	0.000686875	53.7143	61.7374	0.351544	-0.200491	32.23	26.3552	0.139013	0.289324
Higher RPS in Berkshire	8	32353246	ENSSSCG00000022945	UCHL1	9.64694	9.19498	0.0311652	0.45196	Inactive	1.88081	3.0342	0.382666	32760000	32765000	Less activity	33.3566	19.779	0.0753365	13.5776	0.707397	0.346417	0.996578	0.996968	0.996305	0.939559	0.955996	0.991943	0.00047284	53.7143	61.7374	0.351544	-0.200491	32.4611	34.0067	0.673391	-0.0669101
Higher RPS in Berkshire	8	66236143	ENSSSCG00000034735	Unknown	3.5583	2.78802	0.00231086	0.770279	Active	0.164019	0.164019	-	66285000	66290000	Less activity	71.327	12.4593	0.112911	58.8677	0	0	0.9989	1	0.999067	1	1	1	0	5.48174	7.80563	0.548484	-0.502166	0	0.119268	0.391002	-
Higher RPS in Berkshire	8	66236143	ENSSSCG00000034735	Unknown	3.5583	2.78802	0.00231086	0.770279	Active	0.164019	0.164019	-	66325000	66330000	Less activity	65.3149	47.0568	0.408691	18.2582	0.221646	0.775061	0.9989	1	0.999067	0.997352	0.999034	0.999267	-7.64706e-05	5.48174	7.80563	0.548484	-0.502166	31.2777	21.9297	0.305436	0.510291
Higher RPS in Berkshire	8	66236111	ENSSSCG00000047476	Unknown	3.5583	2.78802	0.00231086	0.770279	Active	21.1221	35.8742	0.370587	66285000	66290000	Less activity	71.327	12.4593	0.112911	58.8677	0	0	0.9989	1	0.999067	1	1	1	0	5.48174	7.80563	0.548484	-0.502166	0	0.119268	0.391002	-
Higher RPS in Berkshire	8	66236111	ENSSSCG00000047476	Unknown	3.5583	2.78802	0.00231086	0.770279	Active	21.1221	35.8742	0.370587	66325000	66330000	Less activity	65.3149	47.0568	0.408691	18.2582	0.00910351	0.0293903	0.9989	1	0.999067	0.997352	0.999034	0.999267	-7.64706e-05	5.48174	7.80563	0.548484	-0.502166	31.2777	21.9297	0.305436	0.510291
Higher RPS in Berkshire	8	66372277	ENSSSCG00000037521	Unknown	8.76601	3.29397	0.00242625	5.47204	Inactive	26.5918	21.5478	0.55239	66435000	66440000	Moderate activity	9.86018	30.3558	0.171883	-20.4956	0.833714	0.412735	0.985205	0.994693	0.9997	0.99955	0.9999	1	0.0124042	35.1996	38.0966	0.754632	-0.113792	3.06285	4.75092	0.118381	-0.617032
Higher RPS in Berkshire	8	66372277	ENSSSCG00000037521	Unknown	8.76601	3.29397	0.00242625	5.47204	Inactive	26.5918	21.5478	0.55239	66480000	66485000	Less activity	19.7577	0	0.00655622	19.7577	0.367472	0.258599	0.985205	0.994693	0.9997	0.999375	0.9997	0.9989	0.0227643	35.1996	38.0966	0.754632	-0.113792	0.379729	0.681777	0.607849	-
Higher RPS in Berkshire	8	66372277	ENSSSCG00000037521	Unknown	8.76601	3.29397	0.00242625	5.47204	Inactive	26.5918	21.5478	0.55239	66495000	66500000	Less activity	38.3719	6.93693	0.0618856	31.435	0.67543	0.383594	0.985205	0.994693	0.9997	0.99835	0.999767	0.999	0.0199187	35.1996	38.0966	0.754632	-0.113792	2.84729	1.21251	0.11631	1.16706
Higher RPS in Berkshire	8	66372277	ENSSSCG00000037521	Unknown	8.76601	3.29397	0.00242625	5.47204	Inactive	26.5918	21.5478	0.55239	66500000	66505000	Moderate activity	31.3924	0	0.0283843	31.3924	0.685933	0.522266	0.985205	0.994693	0.9997	0.99995	0.9999	1	0.019128	35.1996	38.0966	0.754632	-0.113792	1.0037	1.62871	0.0715408	-0.64735
Higher RPS in Berkshire	8	66372277	ENSSSCG00000037521	Unknown	8.76601	3.29397	0.00242625	5.47204	Inactive	26.5918	21.5478	0.55239	66510000	66515000	Less activity	25.036	15.2234	0.637022	9.81255	0.504323	0.416133	0.985205	0.994693	0.9997	1	1	1	0.0177111	35.1996	38.0966	0.754632	-0.113792	0.379729	0.125404	0.490711	-
Higher RPS in Berkshire	8	66372277	ENSSSCG00000037521	Unknown	8.76601	3.29397	0.00242625	5.47204	Inactive	26.5918	21.5478	0.55239	66545000	66550000	Less activity	22.9214	0	0.0372549	22.9214	0.631157	0.319494	0.985205	0.994693	0.9997	1	1	1	0.0140868	35.1996	38.0966	0.754632	-0.113792	0.124475	0.119268	0.980771	-
Higher RPS in Berkshire	8	66372277	ENSSSCG00000037521	Unknown	8.76601	3.29397	0.00242625	5.47204	Inactive	26.5918	21.5478	0.55239	66560000	66565000	Less activity	19.7303	1.97028	0.12137	17.76	0.311274	0.366811	0.985205	0.994693	0.9997	1	1	1	0.0129446	35.1996	38.0966	0.754632	-0.113792	0	0.182342	0.210533	-
Higher RPS in Berkshire	8	73089676	ENSSSCG00000049617	Unknown	4.24962	3.31077	0.0451169	0.938855	Inactive	-	-	-	72965000	72970000	Less activity	23.383	19.6544	0.460737	3.72855	0.46245	0.20696	0.992931	0.99105	0.9996	0.990216	0.994137	0.999333	-0.00299783	17.9436	15.0525	0.0903454	0.251936	21.4744	25.8525	0.0857323	-0.26655
Higher RPS in Berkshire	8	73089676	ENSSSCG00000049617	Unknown	4.24962	3.31077	0.0451169	0.938855	Inactive	-	-	-	72970000	72975000	Less activity	32.226	16.888	0.120374	15.338	0.855346	0.366992	0.992931	0.99105	0.9996	0.991087	0.995984	1	-0.00297727	17.9436	15.0525	0.0903454	0.251936	17.0691	18.7272	0.36412	-0.133008
Higher RPS in Berkshire	8	73089676	ENSSSCG00000049617	Unknown	4.24962	3.31077	0.0451169	0.938855	Inactive	-	-	-	72975000	72980000	Less activity	22.6663	5.97694	0.0140177	16.6894	0.717899	0.225331	0.992931	0.99105	0.9996	0.992011	0.990555	1	-0.00315714	17.9436	15.0525	0.0903454	0.251936	14.9934	18.5452	0.0783126	-0.304886
Higher RPS in Berkshire	8	116199137	ENSSSCG00000021764	ARHGEF38	10.1569	7.7529	0.0157497	2.40403	Active	10.1068	3.6277	0.735869	116105000	116110000	Moderate activity	25.5087	24.0752	0.840498	1.43348	0.933672	0.957096	0.992564	0.994908	0.992418	0.994861	0.997137	0.995212	0.00289706	92.812	68.8812	0.257365	0.429662	21.0534	20.0031	0.852087	0.0734715
Higher RPS in Berkshire	8	116199137	ENSSSCG00000021764	ARHGEF38	10.1569	7.7529	0.0157497	2.40403	Active	10.1068	3.6277	0.735869	116110000	116115000	Moderate activity	28.0262	22.723	0.318627	5.30326	0.952113	0.851698	0.992564	0.994908	0.992418	0.992565	0.99604	0.994879	0.00302187	92.812	68.8812	0.257365	0.429662	34.2102	27.0379	0.199351	0.338325
Higher RPS in Berkshire	8	116199137	ENSSSCG00000021764	ARHGEF38	10.1569	7.7529	0.0157497	2.40403	Active	10.1068	3.6277	0.735869	116115000	116120000	Moderate activity	39.5561	13.6177	0.107064	25.9384	0.939322	0.749419	0.992564	0.994908	0.992418	0.982251	0.986757	0.989606	0.00362667	92.812	68.8812	0.257365	0.429662	35.3291	29.1838	0.536376	0.274833
Higher RPS in Berkshire	8	116199137	ENSSSCG00000021764	ARHGEF38	10.1569	7.7529	0.0157497	2.40403	Active	10.1068	3.6277	0.735869	116120000	116125000	Moderate activity	40.1957	22.5012	0.105138	17.6946	0.989141	0.759736	0.992564	0.994908	0.992418	0.993401	0.997401	0.996167	0.00389286	92.812	68.8812	0.257365	0.429662	113.019	27.4107	0.129513	2.03978
Higher RPS in Berkshire	8	116199137	ENSSSCG00000021764	ARHGEF38	10.1569	7.7529	0.0157497	2.40403	Active	10.1068	3.6277	0.735869	116125000	116130000	Moderate activity	33.2907	9.39486	0.0657299	23.8959	0.979179	0.913796	0.992564	0.994908	0.992418	0.98532	0.986139	0.991397	0.00453846	92.812	68.8812	0.257365	0.429662	33.6883	24.5059	0.191651	0.457517
Higher RPS in Berkshire	8	116199137	ENSSSCG00000021764	ARHGEF38	10.1569	7.7529	0.0157497	2.40403	Active	10.1068	3.6277	0.735869	116130000	116135000	Moderate activity	23.1556	6.38053	0.0348576	16.7751	0.660287	0.90141	0.992564	0.994908	0.992418	0.99129	0.993577	0.995307	0.00491667	92.812	68.8812	0.257365	0.429662	48.5622	31.8986	0.124346	0.604789
Higher RPS in Berkshire	8	116199137	ENSSSCG00000021764	ARHGEF38	10.1569	7.7529	0.0157497	2.40403	Active	10.1068	3.6277	0.735869	116140000	116145000	Moderate activity	27.3048	15.9729	0.283169	11.3319	0.919166	0.765848	0.992564	0.994908	0.992418	0.989866	0.994376	0.993782	0.007205	92.812	68.8812	0.257365	0.429662	65.439	51.7467	0.603481	0.338101
Higher RPS in Berkshire	8	118811834	ENSSSCG00000049973	Unknown	2.03286	0.48438	0.00435543	1.54847	Inactive	0.19328	0.183722	-	118425000	118430000	Moderate activity	22.0267	4.1889	0.105759	17.8378	0.445423	0.35798	0.99269	0.989959	0.997269	0.9896	0.989337	0.996833	0.000954605	16.5054	15.6808	0.627449	0.0734822	26.6396	21.4686	0.0841857	0.310046
Higher RPS in Berkshire	8	118811834	ENSSSCG00000049973	Unknown	2.03286	0.48438	0.00435543	1.54847	Inactive	0.19328	0.183722	-	120520000	120525000	Less activity	15.2217	0	0.192864	15.2217	0.789793	0.712101	0.99269	0.989959	0.997269	1	1	1	-0.00193343	16.5054	15.6808	0.627449	0.0734822	1.05766	1.35292	0.65871	-0.327739
Higher RPS in Berkshire	3	4518684	ENSSSCG00000008665	Unknown	1.99626	1.27294	0.0291819	0.723322	Inactive	0	0	-	4465000	4470000	Less activity	28.2162	16.2512	0.596127	11.9651	0.103714	0.230263	0.981855	0.996633	0.982633	0.9985	0.998067	1	-0.00217222	28.4311	33.0943	0.141765	-0.218402	7.86098	8.66771	0.275378	-0.139253
Higher RPS in Berkshire	3	4518684	ENSSSCG00000008665	Unknown	1.99626	1.27294	0.0291819	0.723322	Inactive	0	0	-	5150000	5155000	Less activity	33.6209	13.3298	0.475138	20.2911	0.461217	0.111761	0.981855	0.996633	0.982633	0.760646	0.983979	0.842029	0.0022381	28.4311	33.0943	0.141765	-0.218402	24.0574	23.9257	0.980327	0.00789121
Higher RPS in Berkshire	3	17065818	ENSSSCG00000007753	RUSF1	10.4506	8.81392	0.034944	1.63669	Active	5.78858	7.69227	0.429393	16920000	16925000	Less activity	22.5792	17.0539	0.466497	5.52527	0.312041	0.614144	0.923259	0.986307	0.999867	0.994161	0.990857	1	-0.0050625	244.212	258.197	0.285131	-0.0803047	21.2616	25.8365	0.26666	-0.279964
Higher RPS in Berkshire	3	17065818	ENSSSCG00000007753	RUSF1	10.4506	8.81392	0.034944	1.63669	Active	5.78858	7.69227	0.429393	16930000	16935000	Less activity	32.566	23.8943	0.466519	8.67172	0.541993	0.489079	0.923259	0.986307	0.999867	0.989559	0.987714	1	-0.00553654	244.212	258.197	0.285131	-0.0803047	162.723	160.282	0.802963	0.0217945
Higher RPS in Berkshire	3	17065818	ENSSSCG00000007753	RUSF1	10.4506	8.81392	0.034944	1.63669	Active	5.78858	7.69227	0.429393	16935000	16940000	Less activity	41.1581	31.6244	0.322519	9.53365	0.400846	0.440137	0.923259	0.986307	0.999867	0.994162	0.994983	1	-0.005716	244.212	258.197	0.285131	-0.0803047	236.484	251.171	0.310369	-0.0868902
Higher RPS in Berkshire	3	17065818	ENSSSCG00000007753	RUSF1	10.4506	8.81392	0.034944	1.63669	Active	5.78858	7.69227	0.429393	16945000	16950000	Less activity	56.1795	45.2471	0.353355	10.9323	0.3436	0.263062	0.923259	0.986307	0.999867	0.961463	0.942282	1	-0.00730652	244.212	258.197	0.285131	-0.0803047	43.7557	42.2925	0.602067	0.0489545
Higher RPS in Berkshire	3	17065818	ENSSSCG00000007753	RUSF1	10.4506	8.81392	0.034944	1.63669	Active	5.78858	7.69227	0.429393	16955000	16960000	Less activity	33.8421	16.3409	0.0801257	17.5012	0.60969	0.462737	0.923259	0.986307	0.999867	0.97588	0.985289	1	-0.00901667	244.212	258.197	0.285131	-0.0803047	27.891	29.6557	0.61796	-0.0882019
Higher RPS in Berkshire	3	17065818	ENSSSCG00000007753	RUSF1	10.4506	8.81392	0.034944	1.63669	Active	5.78858	7.69227	0.429393	16960000	16965000	Less activity	26.8729	18.4384	0.446665	8.43448	0.793765	0.622185	0.923259	0.986307	0.999867	0.975714	0.995409	0.999867	-0.0094275	244.212	258.197	0.285131	-0.0803047	30.3675	25.084	0.038946	0.274763
Higher RPS in Berkshire	3	17065818	ENSSSCG00000007753	RUSF1	10.4506	8.81392	0.034944	1.63669	Active	5.78858	7.69227	0.429393	16965000	16970000	Moderate activity	24.269	5.06678	0.0128016	19.2022	0.431794	0.493885	0.923259	0.986307	0.999867	0.926657	0.989257	1	-0.0128395	244.212	258.197	0.285131	-0.0803047	43.7925	43.2738	0.884501	0.0171514
Higher RPS in Berkshire	3	18983553	ENSSSCG00000007813	RPL13	1.37826	0.251303	0.0459338	1.12696	Inactive	0.0479478	0.0479478	-	19175000	19180000	Less activity	25.7464	2.28018	0.0727766	23.4662	0.33273	0.144091	0.986429	0.993784	0.9979	1	1	1	0.000168421	22.714	24.4333	0.80281	-0.104824	0	0.119268	0.391002	-
Higher RPS in Berkshire	3	21503863	ENSSSCG00000031865	AQP8	17.4983	14.6115	0.0272734	2.88682	Active	1.56551	1.98216	0.441278	21545000	21550000	Moderate activity	38.3743	27.0181	0.440558	11.3562	0.896796	0.806022	0.990922	0.995937	0.999467	0.995934	0.998099	0.999155	-0.0142875	39.7166	35.9394	0.112328	0.143796	30.929	31.7681	0.757398	-0.0384981
Higher RPS in Berkshire	3	21503863	ENSSSCG00000031865	AQP8	17.4983	14.6115	0.0272734	2.88682	Active	1.56551	1.98216	0.441278	21550000	21555000	Moderate activity	29.8312	38.1506	0.59114	-8.31946	0.964809	0.700339	0.990922	0.995937	0.999467	0.987059	0.993439	0.99887	-0.0126778	39.7166	35.9394	0.112328	0.143796	44.7249	51.06	0.0441308	-0.190715
Higher RPS in Berkshire	3	21503863	ENSSSCG00000031865	AQP8	17.4983	14.6115	0.0272734	2.88682	Active	1.56551	1.98216	0.441278	21555000	21560000	Less activity	36.9889	34.0112	0.757665	2.97769	0.790401	0.599123	0.990922	0.995937	0.999467	0.994751	0.9978	0.9993	-0.01141	39.7166	35.9394	0.112328	0.143796	36.4844	32.937	0.0661791	0.147144
Higher RPS in Berkshire	3	21503863	ENSSSCG00000031865	AQP8	17.4983	14.6115	0.0272734	2.88682	Active	1.56551	1.98216	0.441278	21570000	21575000	Less activity	23.7184	23.8407	0.987114	-0.122259	0.819784	0.589733	0.990922	0.995937	0.999467	0.948645	0.968753	0.999906	-0.00885	39.7166	35.9394	0.112328	0.143796	22.6852	23.6721	0.531961	-0.0611769
Higher RPS in Berkshire	3	21503863	ENSSSCG00000031865	AQP8	17.4983	14.6115	0.0272734	2.88682	Active	1.56551	1.98216	0.441278	21575000	21580000	Less activity	19.8314	11.1601	0.19292	8.67127	0.883472	0.708432	0.990922	0.995937	0.999467	0.992903	0.9992	1	-0.00469643	39.7166	35.9394	0.112328	0.143796	21.1109	17.2021	0.200309	0.293864
Higher RPS in Berkshire	3	21503863	ENSSSCG00000031865	AQP8	17.4983	14.6115	0.0272734	2.88682	Active	1.56551	1.98216	0.441278	21580000	21585000	Less activity	23.5675	7.80498	0.112789	15.7625	0.984498	0.526156	0.990922	0.995937	0.999467	0.998	0.999567	0.999366	-0.00448	39.7166	35.9394	0.112328	0.143796	12.7442	9.58843	0.088653	0.406787
Higher RPS in Berkshire	3	21503863	ENSSSCG00000031865	AQP8	17.4983	14.6115	0.0272734	2.88682	Active	1.56551	1.98216	0.441278	21585000	21590000	Less activity	23.1639	24.1836	0.967192	-1.01962	0.940176	0.648155	0.990922	0.995937	0.999467	0.997151	0.998767	0.998867	-0.004225	39.7166	35.9394	0.112328	0.143796	15.2285	12.3798	0.479794	0.296617
Higher RPS in Berkshire	3	21503863	ENSSSCG00000031865	AQP8	17.4983	14.6115	0.0272734	2.88682	Active	1.56551	1.98216	0.441278	21595000	21600000	Less activity	18.5673	7.50386	0.16767	11.0634	0.837299	0.590032	0.990922	0.995937	0.999467	0.994657	0.9994	0.999567	-0.00378889	39.7166	35.9394	0.112328	0.143796	19.7324	17.5098	0.234355	0.171475
Higher RPS in Berkshire	3	21503863	ENSSSCG00000031865	AQP8	17.4983	14.6115	0.0272734	2.88682	Active	1.56551	1.98216	0.441278	21600000	21605000	Less activity	19.9519	13.4426	0.470635	6.50934	0.934406	0.503569	0.990922	0.995937	0.999467	0.997426	0.998667	0.9999	-0.00356053	39.7166	35.9394	0.112328	0.143796	13.5133	10.2419	0.122388	0.396524
Higher RPS in Berkshire	3	21503863	ENSSSCG00000031865	AQP8	17.4983	14.6115	0.0272734	2.88682	Active	1.56551	1.98216	0.441278	21610000	21615000	Less activity	33.6607	10.042	0.102076	23.6187	0.758279	0.43486	0.990922	0.995937	0.999467	0.9979	0.999667	0.998267	-0.00319762	39.7166	35.9394	0.112328	0.143796	15.5688	14.55	0.809358	0.0969901
Higher RPS in Berkshire	3	21503863	ENSSSCG00000031865	AQP8	17.4983	14.6115	0.0272734	2.88682	Active	1.56551	1.98216	0.441278	21615000	21620000	Less activity	31.288	21.0199	0.173463	10.2681	0.938075	0.384078	0.990922	0.995937	0.999467	0.99965	0.9999	0.999667	-0.00304318	39.7166	35.9394	0.112328	0.143796	4.0276	4.64843	0.665457	-0.202145
Higher RPS in Berkshire	3	21503863	ENSSSCG00000031865	AQP8	17.4983	14.6115	0.0272734	2.88682	Active	1.56551	1.98216	0.441278	21620000	21625000	Less activity	29.7233	21.3945	0.176586	8.32874	0.967254	0.621291	0.990922	0.995937	0.999467	0.99725	0.9979	0.999	-0.00291087	39.7166	35.9394	0.112328	0.143796	12.9107	9.30088	0.0335236	0.468826
Higher RPS in Berkshire	3	21503863	ENSSSCG00000031865	AQP8	17.4983	14.6115	0.0272734	2.88682	Active	1.56551	1.98216	0.441278	21640000	21645000	Less activity	14.5345	6.05288	0.637417	8.48166	0.750964	0.895072	0.990922	0.995937	0.999467	1	1	1	-0.00248333	39.7166	35.9394	0.112328	0.143796	0	0	NA	-
Higher RPS in Berkshire	3	31814843	ENSSSCG00000022149	RMI2	19.974	18.9735	0.0289797	1.00044	Active	8.46844	7.20564	0.540283	31865000	31870000	Less activity	34.8642	28.094	0.57027	6.77022	0.133646	0.15486	0.998	0.999367	0.998967	0.997702	0.998601	0.999	0.001035	94.5559	101.721	0.266755	-0.105272	45.9037	41.5728	0.360002	0.142644
Higher RPS in Berkshire	3	31814843	ENSSSCG00000022149	RMI2	19.974	18.9735	0.0289797	1.00044	Active	8.46844	7.20564	0.540283	31875000	31880000	Less activity	38.7586	33.1924	0.628569	5.56622	0.401959	0.267017	0.998	0.999367	0.998967	0.99865	0.9992	0.999567	0.000829167	94.5559	101.721	0.266755	-0.105272	65.6739	60.8325	0.0574043	0.110303
Higher RPS in Berkshire	3	31814843	ENSSSCG00000022149	RMI2	19.974	18.9735	0.0289797	1.00044	Active	8.46844	7.20564	0.540283	32095000	32100000	Less activity	24.8989	21.9523	0.76615	2.94662	0.291443	0.243009	0.998	0.999367	0.998967	0.994251	0.996068	0.999767	-0.000597321	94.5559	101.721	0.266755	-0.105272	32.8655	40.3338	0.147983	-0.294609
Higher RPS in Berkshire	3	31814843	ENSSSCG00000022149	RMI2	19.974	18.9735	0.0289797	1.00044	Active	8.46844	7.20564	0.540283	32100000	32105000	Less activity	24.0571	16.2655	0.264209	7.79164	0.365248	0.358773	0.998	0.999367	0.998967	0.990256	0.997327	0.9995	-0.000579825	94.5559	101.721	0.266755	-0.105272	36.5399	39.2461	0.431122	-0.102804
Higher RPS in Berkshire	3	31814843	ENSSSCG00000022149	RMI2	19.974	18.9735	0.0289797	1.00044	Active	8.46844	7.20564	0.540283	32105000	32110000	Less activity	31.597	24.337	0.165981	7.26005	0.389745	0.297723	0.998	0.999367	0.998967	0.993003	0.995869	0.9988	-0.000521552	94.5559	101.721	0.266755	-0.105272	40.7948	38.5203	0.452588	0.0825589
Higher RPS in Berkshire	3	31814843	ENSSSCG00000022149	RMI2	19.974	18.9735	0.0289797	1.00044	Active	8.46844	7.20564	0.540283	32110000	32115000	Less activity	32.7497	20.8833	0.0420704	11.8664	0.50204	0.0259332	0.998	0.999367	0.998967	0.992153	0.996632	0.999733	-0.000533051	94.5559	101.721	0.266755	-0.105272	37.1934	38.2914	0.613216	-0.04186
Higher RPS in Berkshire	3	31814843	ENSSSCG00000022149	RMI2	19.974	18.9735	0.0289797	1.00044	Active	8.46844	7.20564	0.540283	32115000	32120000	Less activity	34.6257	28.6666	0.317848	5.95912	0.62169	0.285328	0.998	0.999367	0.998967	0.993151	0.9981	0.999867	-0.0004975	94.5559	101.721	0.266755	-0.105272	42.9515	43.4963	0.803491	-0.018143
Higher RPS in Berkshire	3	31814843	ENSSSCG00000022149	RMI2	19.974	18.9735	0.0289797	1.00044	Active	8.46844	7.20564	0.540283	32120000	32125000	Moderate activity	45.2474	44.166	0.93009	1.08142	0.651633	0.463032	0.998	0.999367	0.998967	0.992152	0.995171	0.999867	-0.000485246	94.5559	101.721	0.266755	-0.105272	37.8439	37.9333	0.944171	-0.0033923
Higher RPS in Berkshire	3	31814843	ENSSSCG00000022149	RMI2	19.974	18.9735	0.0289797	1.00044	Active	8.46844	7.20564	0.540283	32125000	32130000	Moderate activity	43.8231	50.5987	0.293389	-6.77556	0.532175	0.726363	0.998	0.999367	0.998967	0.931517	0.997583	0.9996	-0.000485484	94.5559	101.721	0.266755	-0.105272	58.403	53.1876	0.079604	0.134711
Higher RPS in Berkshire	3	31814843	ENSSSCG00000022149	RMI2	19.974	18.9735	0.0289797	1.00044	Active	8.46844	7.20564	0.540283	32130000	32135000	Less activity	48.1713	45.4949	0.782085	2.67647	0.673192	0.459635	0.998	0.999367	0.998967	0.992256	0.996201	0.999467	0.000513492	94.5559	101.721	0.266755	-0.105272	38.0917	36.386	0.77186	0.0659142
Higher RPS in Berkshire	3	31814843	ENSSSCG00000022149	RMI2	19.974	18.9735	0.0289797	1.00044	Active	8.46844	7.20564	0.540283	32135000	32140000	Less activity	55.6444	33.6639	0.160258	21.9804	0.686338	0.639428	0.998	0.999367	0.998967	0.995701	0.998201	0.9996	0.000517187	94.5559	101.721	0.266755	-0.105272	31.3247	30.9994	0.434969	0.0150145
Higher RPS in Berkshire	3	31814843	ENSSSCG00000022149	RMI2	19.974	18.9735	0.0289797	1.00044	Active	8.46844	7.20564	0.540283	32140000	32145000	Less activity	28.6921	24.9054	0.680057	3.78679	0.525656	0.478819	0.998	0.999367	0.998967	0.995899	0.996631	0.999167	0.000504615	94.5559	101.721	0.266755	-0.105272	18.9832	22.2391	0.176563	-0.227268
Higher RPS in Berkshire	3	31814843	ENSSSCG00000022149	RMI2	19.974	18.9735	0.0289797	1.00044	Active	8.46844	7.20564	0.540283	32145000	32150000	Less activity	26.8908	24.7617	0.801528	2.12909	0.492929	0.187971	0.998	0.999367	0.998967	0.986935	0.990625	0.999733	0.000514394	94.5559	101.721	0.266755	-0.105272	38.3478	36.0655	0.430958	0.0882889
Higher RPS in Berkshire	3	39395274	ENSSSCG00000008062	PRSS27	3.52773	2.52605	0.0466275	1.00167	Active	0.0753553	0.0753553	-	37625000	37630000	Moderate activity	19.3579	0	0.197077	19.3579	0.047779	0.155227	0.9987	1	0.9998	1	1	1	0.00132677	21.2146	23.4121	0.395966	-0.141558	0	0	NA	-
Higher RPS in Berkshire	3	39395274	ENSSSCG00000008062	PRSS27	3.52773	2.52605	0.0466275	1.00167	Active	0.0753553	0.0753553	-	39505000	39510000	Less activity	33.1968	30.0049	0.745678	3.19192	0.0433951	0.0381158	0.9987	1	0.9998	0.99835	0.9999	1	0.00347857	21.2146	23.4121	0.395966	-0.141558	43.9738	57.9173	0.0395054	-0.396561
Higher RPS in Berkshire	3	39395274	ENSSSCG00000008062	PRSS27	3.52773	2.52605	0.0466275	1.00167	Active	0.0753553	0.0753553	-	39510000	39515000	Less activity	20.4055	13.0628	0.58447	7.34269	0.033736	0.0843138	0.9987	1	0.9998	0.997656	1	1	0.00332045	21.2146	23.4121	0.395966	-0.141558	15.1297	15.8412	0.758483	-0.0658751
Higher RPS in Berkshire	3	39837440	ENSSSCG00000033691	RAB26	20.6562	19.4689	0.0420145	1.18734	Active	0.103694	0.10956	-	39430000	39435000	Less activity	16.0353	12.7711	0.809326	3.26422	0.565847	0.516213	0.99825	0.9999	1	0.9974	1	1	0.00015625	17.7193	15.0942	0.652777	0.229918	47.226	46.69	0.841299	0.0164305
Higher RPS in Berkshire	3	39837440	ENSSSCG00000033691	RAB26	20.6562	19.4689	0.0420145	1.18734	Active	0.103694	0.10956	-	39890000	39895000	Less activity	22.9068	33.6393	0.432016	-10.7325	0.852363	0.719299	0.99825	0.9999	1	0.999	1	1	7e-05	17.7193	15.0942	0.652777	0.229918	7.16697	7.35423	0.906124	-0.0367039
Higher RPS in Berkshire	3	39837440	ENSSSCG00000033691	RAB26	20.6562	19.4689	0.0420145	1.18734	Active	0.103694	0.10956	-	39895000	39900000	Less activity	30.6801	44.0222	0.0246362	-13.3421	0.673317	0.641996	0.99825	0.9999	1	0.997803	0.9999	0.9999	0.0001	17.7193	15.0942	0.652777	0.229918	8.47491	12.6728	0.27972	-0.574881
Higher RPS in Berkshire	3	39837440	ENSSSCG00000033691	RAB26	20.6562	19.4689	0.0420145	1.18734	Active	0.103694	0.10956	-	39900000	39905000	Less activity	17.6941	33.8641	0.116034	-16.17	0.855728	0.660933	0.99825	0.9999	1	0.9988	1	1	-2.5e-05	17.7193	15.0942	0.652777	0.229918	14.0999	17.6569	0.234849	-0.322505
Higher RPS in Berkshire	3	39837440	ENSSSCG00000033691	RAB26	20.6562	19.4689	0.0420145	1.18734	Active	0.103694	0.10956	-	39920000	39925000	Less activity	29.3224	9.57325	0.100518	19.7491	0.665448	0.823513	0.99825	0.9999	1	0.9982	1	1	1.875e-05	17.7193	15.0942	0.652777	0.229918	8.55846	11.0588	0.247858	-0.366003
Higher RPS in Berkshire	3	39837440	ENSSSCG00000033691	RAB26	20.6562	19.4689	0.0420145	1.18734	Active	0.103694	0.10956	-	39925000	39930000	Less activity	17.1525	32.0598	0.464647	-14.9072	0.632909	0.384423	0.99825	0.9999	1	0.9984	1	1	7.64706e-05	17.7193	15.0942	0.652777	0.229918	21.1565	23.2795	0.163547	-0.137337
Higher RPS in Berkshire	3	39837440	ENSSSCG00000033691	RAB26	20.6562	19.4689	0.0420145	1.18734	Active	0.103694	0.10956	-	39940000	39945000	Less activity	34.7818	51.717	0.39078	-16.9352	0.797487	0.70235	0.99825	0.9999	1	0.99855	0.9999	1	6.5e-05	17.7193	15.0942	0.652777	0.229918	199.858	173.786	0.149548	0.201559
Higher RPS in Berkshire	3	39837440	ENSSSCG00000033691	RAB26	20.6562	19.4689	0.0420145	1.18734	Active	0.103694	0.10956	-	39945000	39950000	Less activity	46.0588	33.677	0.655291	12.3818	0.612818	0.61398	0.99825	0.9999	1	0.9976	1	1	5.95238e-05	17.7193	15.0942	0.652777	0.229918	104.895	90.713	0.502959	0.209354
Higher RPS in Berkshire	3	39837440	ENSSSCG00000033691	RAB26	20.6562	19.4689	0.0420145	1.18734	Active	0.103694	0.10956	-	39965000	39970000	Less activity	59.644	53.4797	0.644961	6.16434	0.914237	0.384818	0.99825	0.9999	1	0.999	1	1	0.000266	17.7193	15.0942	0.652777	0.229918	18.9427	19.5055	0.607417	-0.042022
Higher RPS in Berkshire	3	39837440	ENSSSCG00000033691	RAB26	20.6562	19.4689	0.0420145	1.18734	Active	0.103694	0.10956	-	39970000	39975000	Less activity	59.8141	51.9368	0.068411	7.87727	0.986371	0.358692	0.99825	0.9999	1	0.967784	0.999894	0.959867	0.000255769	17.7193	15.0942	0.652777	0.229918	9.69675	12.3882	0.179967	-0.35019
Higher RPS in Berkshire	3	39837440	ENSSSCG00000033691	RAB26	20.6562	19.4689	0.0420145	1.18734	Active	0.103694	0.10956	-	39980000	39985000	Less activity	37.4125	46.9709	0.145855	-9.55842	0.715027	0.420622	0.99825	0.9999	1	0.9992	1	1	0.00137679	17.7193	15.0942	0.652777	0.229918	10.0278	9.45567	0.603134	0.0838954
Higher RPS in Berkshire	3	39837440	ENSSSCG00000033691	RAB26	20.6562	19.4689	0.0420145	1.18734	Active	0.103694	0.10956	-	39990000	39995000	Less activity	35.3396	25.193	0.361003	10.1466	0.479312	0.684956	0.99825	0.9999	1	0.99865	1	0.9999	0.001265	17.7193	15.0942	0.652777	0.229918	16.2398	16.4243	0.902441	-0.0161931
Higher RPS in Berkshire	3	39837440	ENSSSCG00000033691	RAB26	20.6562	19.4689	0.0420145	1.18734	Active	0.103694	0.10956	-	40000000	40005000	Less activity	32.337	27.2706	0.649574	5.06641	0.550909	0.282677	0.99825	0.9999	1	0.996651	1	0.9995	0.00119844	17.7193	15.0942	0.652777	0.229918	123.763	120.095	0.341261	0.0433639
Higher RPS in Berkshire	3	39837440	ENSSSCG00000033691	RAB26	20.6562	19.4689	0.0420145	1.18734	Active	0.103694	0.10956	-	40010000	40015000	Less activity	28.4842	15.9166	0.257554	12.5677	0.625183	0.32584	0.99825	0.9999	1	0.9988	1	1	0.00109118	17.7193	15.0942	0.652777	0.229918	75.3377	75.2182	0.952836	0.00228717
Higher RPS in Berkshire	3	39837440	ENSSSCG00000033691	RAB26	20.6562	19.4689	0.0420145	1.18734	Active	0.103694	0.10956	-	40205000	40210000	Less activity	14.1785	5.77314	0.453153	8.40532	0.589033	0.819431	0.99825	0.9999	1	0.9978	1	1	-0.000324658	17.7193	15.0942	0.652777	0.229918	20.4912	19.1983	0.737721	0.0935543
Higher RPS in Berkshire	3	42052920	ENSSSCG00000008068	IARS1	15.6574	13.9946	0.0376233	1.66283	Active	71.6987	66.1485	0.520132	41755000	41760000	Less activity	23.2442	0	0.00262921	23.2442	0.753645	0.613082	0.99755	0.9998	0.998833	1	1	1	-0.00197155	239.833	234.348	0.568248	0.0333682	0	0.574237	0.11779	-
Higher RPS in Berkshire	3	42052920	ENSSSCG00000008068	IARS1	15.6574	13.9946	0.0376233	1.66283	Active	71.6987	66.1485	0.520132	42110000	42115000	Less activity	52.9621	81.421	0.399953	-28.4589	0.495948	0.878751	0.99755	0.9998	0.998833	1	1	1	-0.0028	239.833	234.348	0.568248	0.0333682	0.760825	0.433895	0.525423	-
Higher RPS in Berkshire	3	42052920	ENSSSCG00000008068	IARS1	15.6574	13.9946	0.0376233	1.66283	Active	71.6987	66.1485	0.520132	42315000	42320000	Less activity	19.2319	17.5781	0.799789	1.65378	0.721218	0.762917	0.99755	0.9998	0.998833	0.997601	0.999867	0.999867	0.000403846	239.833	234.348	0.568248	0.0333682	14.6039	11.0617	0.168237	0.397646
Higher RPS in Berkshire	3	42052920	ENSSSCG00000008068	IARS1	15.6574	13.9946	0.0376233	1.66283	Active	71.6987	66.1485	0.520132	42325000	42330000	Less activity	20.6287	28.5481	0.0900198	-7.91938	0.753521	0.924842	0.99755	0.9998	0.998833	0.997402	1	1	0.000416667	239.833	234.348	0.568248	0.0333682	8.5779	9.26133	0.594565	-0.109368
Higher RPS in Berkshire	3	42052920	ENSSSCG00000008068	IARS1	15.6574	13.9946	0.0376233	1.66283	Active	71.6987	66.1485	0.520132	42330000	42335000	Less activity	32.7988	30.018	0.748138	2.78073	0.501461	0.791706	0.99755	0.9998	0.998833	0.992473	0.999867	0.9999	0.000394545	239.833	234.348	0.568248	0.0333682	27.2638	32.6602	0.0750045	-0.25968
Higher RPS in Berkshire	3	42052920	ENSSSCG00000008068	IARS1	15.6574	13.9946	0.0376233	1.66283	Active	71.6987	66.1485	0.520132	42335000	42340000	Less activity	39.2646	31.0321	0.346664	8.23246	0.522756	0.675837	0.99755	0.9998	0.998833	0.9976	0.9996	0.999733	0.000333929	239.833	234.348	0.568248	0.0333682	15.1539	15.9588	0.550107	-0.0741815
Higher RPS in Berkshire	3	42052920	ENSSSCG00000008068	IARS1	15.6574	13.9946	0.0376233	1.66283	Active	71.6987	66.1485	0.520132	42340000	42345000	Less activity	29.4133	25.4044	0.127278	4.00897	0.918983	0.985306	0.99755	0.9998	0.998833	0.993756	0.999766	0.9992	0.000325439	239.833	234.348	0.568248	0.0333682	13.2553	14.3259	0.677965	-0.111247
Higher RPS in Berkshire	3	42052920	ENSSSCG00000008068	IARS1	15.6574	13.9946	0.0376233	1.66283	Active	71.6987	66.1485	0.520132	42345000	42350000	Less activity	26.5483	22.7314	0.597126	3.8169	0.865367	0.850373	0.99755	0.9998	0.998833	0.995303	1	0.9996	0.000328448	239.833	234.348	0.568248	0.0333682	15.5017	17.3687	0.631623	-0.163072
Higher RPS in Berkshire	3	42052920	ENSSSCG00000008068	IARS1	15.6574	13.9946	0.0376233	1.66283	Active	71.6987	66.1485	0.520132	42350000	42355000	Less activity	21.0602	23.4284	0.759826	-2.36814	0.796985	0.476267	0.99755	0.9998	0.998833	0.982619	0.999736	0.999733	0.000312712	239.833	234.348	0.568248	0.0333682	21.9693	24.0876	0.528426	-0.132229
Higher RPS in Berkshire	3	42052920	ENSSSCG00000008068	IARS1	15.6574	13.9946	0.0376233	1.66283	Active	71.6987	66.1485	0.520132	42360000	42365000	Less activity	17.5342	19.7122	0.639137	-2.17807	0.575217	0.487476	0.99755	0.9998	0.998833	0.810042	0.999158	0.999867	0.000127049	239.833	234.348	0.568248	0.0333682	35.0513	34.3024	0.811688	0.0310689
Higher RPS in Berkshire	3	42052920	ENSSSCG00000008068	IARS1	15.6574	13.9946	0.0376233	1.66283	Active	71.6987	66.1485	0.520132	42370000	42375000	Less activity	25.3325	25.6068	0.923296	-0.274266	0.731506	0.823284	0.99755	0.9998	0.998833	0.994953	0.9999	1	-0.00347381	239.833	234.348	0.568248	0.0333682	27.6688	28.811	0.615092	-0.0581549
Higher RPS in Berkshire	3	42052773	ENSSSCG00000008069	NOL8	15.6574	13.9946	0.0376233	1.66283	Active	19.564	19.3454	0.502809	41755000	41760000	Less activity	23.2442	0	0.00262921	23.2442	0.736608	0.602271	0.99755	0.9998	0.998833	1	1	1	-0.00197155	239.833	234.348	0.568248	0.0333682	0	0.574237	0.11779	-
Higher RPS in Berkshire	3	42052773	ENSSSCG00000008069	NOL8	15.6574	13.9946	0.0376233	1.66283	Active	19.564	19.3454	0.502809	42110000	42115000	Less activity	52.9621	81.421	0.399953	-28.4589	0.851132	0.619981	0.99755	0.9998	0.998833	1	1	1	-0.0028	239.833	234.348	0.568248	0.0333682	0.760825	0.433895	0.525423	-
Higher RPS in Berkshire	3	42052773	ENSSSCG00000008069	NOL8	15.6574	13.9946	0.0376233	1.66283	Active	19.564	19.3454	0.502809	42315000	42320000	Less activity	19.2319	17.5781	0.799789	1.65378	0.674625	0.875231	0.99755	0.9998	0.998833	0.997601	0.999867	0.999867	0.000403846	239.833	234.348	0.568248	0.0333682	14.6039	11.0617	0.168237	0.397646
Higher RPS in Berkshire	3	42052773	ENSSSCG00000008069	NOL8	15.6574	13.9946	0.0376233	1.66283	Active	19.564	19.3454	0.502809	42325000	42330000	Less activity	20.6287	28.5481	0.0900198	-7.91938	0.891593	0.702608	0.99755	0.9998	0.998833	0.997402	1	1	0.000416667	239.833	234.348	0.568248	0.0333682	8.5779	9.26133	0.594565	-0.109368
Higher RPS in Berkshire	3	42052773	ENSSSCG00000008069	NOL8	15.6574	13.9946	0.0376233	1.66283	Active	19.564	19.3454	0.502809	42330000	42335000	Less activity	32.7988	30.018	0.748138	2.78073	0.703701	0.807459	0.99755	0.9998	0.998833	0.992473	0.999867	0.9999	0.000394545	239.833	234.348	0.568248	0.0333682	27.2638	32.6602	0.0750045	-0.25968
Higher RPS in Berkshire	3	42052773	ENSSSCG00000008069	NOL8	15.6574	13.9946	0.0376233	1.66283	Active	19.564	19.3454	0.502809	42335000	42340000	Less activity	39.2646	31.0321	0.346664	8.23246	0.474854	0.557011	0.99755	0.9998	0.998833	0.9976	0.9996	0.999733	0.000333929	239.833	234.348	0.568248	0.0333682	15.1539	15.9588	0.550107	-0.0741815
Higher RPS in Berkshire	3	42052773	ENSSSCG00000008069	NOL8	15.6574	13.9946	0.0376233	1.66283	Active	19.564	19.3454	0.502809	42340000	42345000	Less activity	29.4133	25.4044	0.127278	4.00897	0.983351	0.662284	0.99755	0.9998	0.998833	0.993756	0.999766	0.9992	0.000325439	239.833	234.348	0.568248	0.0333682	13.2553	14.3259	0.677965	-0.111247
Higher RPS in Berkshire	3	42052773	ENSSSCG00000008069	NOL8	15.6574	13.9946	0.0376233	1.66283	Active	19.564	19.3454	0.502809	42345000	42350000	Less activity	26.5483	22.7314	0.597126	3.8169	0.935046	0.905692	0.99755	0.9998	0.998833	0.995303	1	0.9996	0.000328448	239.833	234.348	0.568248	0.0333682	15.5017	17.3687	0.631623	-0.163072
Higher RPS in Berkshire	3	42052773	ENSSSCG00000008069	NOL8	15.6574	13.9946	0.0376233	1.66283	Active	19.564	19.3454	0.502809	42350000	42355000	Less activity	21.0602	23.4284	0.759826	-2.36814	0.696217	0.412363	0.99755	0.9998	0.998833	0.982619	0.999736	0.999733	0.000312712	239.833	234.348	0.568248	0.0333682	21.9693	24.0876	0.528426	-0.132229
Higher RPS in Berkshire	3	42052773	ENSSSCG00000008069	NOL8	15.6574	13.9946	0.0376233	1.66283	Active	19.564	19.3454	0.502809	42360000	42365000	Less activity	17.5342	19.7122	0.639137	-2.17807	0.711999	0.437894	0.99755	0.9998	0.998833	0.810042	0.999158	0.999867	0.000127049	239.833	234.348	0.568248	0.0333682	35.0513	34.3024	0.811688	0.0310689
Higher RPS in Berkshire	3	42052773	ENSSSCG00000008069	NOL8	15.6574	13.9946	0.0376233	1.66283	Active	19.564	19.3454	0.502809	42370000	42375000	Less activity	25.3325	25.6068	0.923296	-0.274266	0.820532	0.930862	0.99755	0.9998	0.998833	0.994953	0.9999	1	-0.00347381	239.833	234.348	0.568248	0.0333682	27.6688	28.811	0.615092	-0.0581549
Higher RPS in Berkshire	3	42053058	ENSSSCG00000008070	CENPP	15.6574	13.9946	0.0376233	1.66283	Active	7.87678	7.45095	0.513891	41755000	41760000	Less activity	23.2442	0	0.00262921	23.2442	0.877703	0.494662	0.99755	0.9998	0.998833	1	1	1	-0.00197155	239.833	234.348	0.568248	0.0333682	0	0.574237	0.11779	-
Higher RPS in Berkshire	3	42053058	ENSSSCG00000008070	CENPP	15.6574	13.9946	0.0376233	1.66283	Active	7.87678	7.45095	0.513891	42110000	42115000	Less activity	52.9621	81.421	0.399953	-28.4589	0.47215	0.592623	0.99755	0.9998	0.998833	1	1	1	-0.0028	239.833	234.348	0.568248	0.0333682	0.760825	0.433895	0.525423	-
Higher RPS in Berkshire	3	42053058	ENSSSCG00000008070	CENPP	15.6574	13.9946	0.0376233	1.66283	Active	7.87678	7.45095	0.513891	42315000	42320000	Less activity	19.2319	17.5781	0.799789	1.65378	0.825744	0.826743	0.99755	0.9998	0.998833	0.997601	0.999867	0.999867	0.000403846	239.833	234.348	0.568248	0.0333682	14.6039	11.0617	0.168237	0.397646
Higher RPS in Berkshire	3	42053058	ENSSSCG00000008070	CENPP	15.6574	13.9946	0.0376233	1.66283	Active	7.87678	7.45095	0.513891	42325000	42330000	Less activity	20.6287	28.5481	0.0900198	-7.91938	0.90759	0.488845	0.99755	0.9998	0.998833	0.997402	1	1	0.000416667	239.833	234.348	0.568248	0.0333682	8.5779	9.26133	0.594565	-0.109368
Higher RPS in Berkshire	3	42053058	ENSSSCG00000008070	CENPP	15.6574	13.9946	0.0376233	1.66283	Active	7.87678	7.45095	0.513891	42330000	42335000	Less activity	32.7988	30.018	0.748138	2.78073	0.669165	0.639356	0.99755	0.9998	0.998833	0.992473	0.999867	0.9999	0.000394545	239.833	234.348	0.568248	0.0333682	27.2638	32.6602	0.0750045	-0.25968
Higher RPS in Berkshire	3	42053058	ENSSSCG00000008070	CENPP	15.6574	13.9946	0.0376233	1.66283	Active	7.87678	7.45095	0.513891	42335000	42340000	Less activity	39.2646	31.0321	0.346664	8.23246	0.265183	0.371511	0.99755	0.9998	0.998833	0.9976	0.9996	0.999733	0.000333929	239.833	234.348	0.568248	0.0333682	15.1539	15.9588	0.550107	-0.0741815
Higher RPS in Berkshire	3	42053058	ENSSSCG00000008070	CENPP	15.6574	13.9946	0.0376233	1.66283	Active	7.87678	7.45095	0.513891	42340000	42345000	Less activity	29.4133	25.4044	0.127278	4.00897	0.640355	0.725734	0.99755	0.9998	0.998833	0.993756	0.999766	0.9992	0.000325439	239.833	234.348	0.568248	0.0333682	13.2553	14.3259	0.677965	-0.111247
Higher RPS in Berkshire	3	42053058	ENSSSCG00000008070	CENPP	15.6574	13.9946	0.0376233	1.66283	Active	7.87678	7.45095	0.513891	42345000	42350000	Less activity	26.5483	22.7314	0.597126	3.8169	0.571349	0.964047	0.99755	0.9998	0.998833	0.995303	1	0.9996	0.000328448	239.833	234.348	0.568248	0.0333682	15.5017	17.3687	0.631623	-0.163072
Higher RPS in Berkshire	3	42053058	ENSSSCG00000008070	CENPP	15.6574	13.9946	0.0376233	1.66283	Active	7.87678	7.45095	0.513891	42350000	42355000	Less activity	21.0602	23.4284	0.759826	-2.36814	0.600213	0.521684	0.99755	0.9998	0.998833	0.982619	0.999736	0.999733	0.000312712	239.833	234.348	0.568248	0.0333682	21.9693	24.0876	0.528426	-0.132229
Higher RPS in Berkshire	3	42053058	ENSSSCG00000008070	CENPP	15.6574	13.9946	0.0376233	1.66283	Active	7.87678	7.45095	0.513891	42360000	42365000	Less activity	17.5342	19.7122	0.639137	-2.17807	0.779288	0.528155	0.99755	0.9998	0.998833	0.810042	0.999158	0.999867	0.000127049	239.833	234.348	0.568248	0.0333682	35.0513	34.3024	0.811688	0.0310689
Higher RPS in Berkshire	3	42053058	ENSSSCG00000008070	CENPP	15.6574	13.9946	0.0376233	1.66283	Active	7.87678	7.45095	0.513891	42370000	42375000	Less activity	25.3325	25.6068	0.923296	-0.274266	0.628533	0.573207	0.99755	0.9998	0.998833	0.994953	0.9999	1	-0.00347381	239.833	234.348	0.568248	0.0333682	27.6688	28.811	0.615092	-0.0581549
Higher RPS in Berkshire	3	46929194	ENSSSCG00000008127	SNRNP200	4.38093	3.87424	0.026922	0.506694	Active	19.7925	18.3532	0.518866	46735000	46740000	Moderate activity	39.5516	31.1855	0.418722	8.36607	0.230374	0.0251618	0.953408	0.948809	1	0.992401	0.992899	1	0.0460122	465.888	496.261	0.0718109	-0.0910977	32.2076	30.1331	0.340113	0.0957459
Higher RPS in Berkshire	3	46929194	ENSSSCG00000008127	SNRNP200	4.38093	3.87424	0.026922	0.506694	Active	19.7925	18.3532	0.518866	46780000	46785000	Moderate activity	19.4365	15.4981	0.474293	3.93844	0.492879	0.609073	0.953408	0.948809	1	0.987073	0.981724	0.999867	0.0586554	465.888	496.261	0.0718109	-0.0910977	44.2133	34.7072	0.0815354	0.348353
Higher RPS in Berkshire	3	46929194	ENSSSCG00000008127	SNRNP200	4.38093	3.87424	0.026922	0.506694	Active	19.7925	18.3532	0.518866	46795000	46800000	Less activity	30.7296	15.6121	0.0174726	15.1175	0.525888	0.314674	0.953408	0.948809	1	0.992003	0.988401	1	0.065712	465.888	496.261	0.0718109	-0.0910977	24.331	22.7571	0.438256	0.0960692
Higher RPS in Berkshire	3	53032639	ENSSSCG00000008168	RNF149	2.71847	2.11477	0.0322481	0.603702	Active	20.9554	22.822	0.47868	53285000	53290000	Moderate activity	24.7749	14.5196	0.173346	10.2553	0.646599	0.766604	0.997101	0.997834	0.9993	0.959086	0.948139	0.989021	0.001659	333.14	297.886	0.370835	0.161316	42.2347	42.4246	0.928734	-0.00645955
Higher RPS in Berkshire	3	53032639	ENSSSCG00000008168	RNF149	2.71847	2.11477	0.0322481	0.603702	Active	20.9554	22.822	0.47868	53295000	53300000	Moderate activity	21.1061	7.9036	0.0334955	13.2025	0.793575	0.490122	0.997101	0.997834	0.9993	0.985816	0.984062	0.993505	0.0010125	333.14	297.886	0.370835	0.161316	119.88	123.798	0.767882	-0.0463594
Higher RPS in Berkshire	3	64850343	ENSSSCG00000031177	REG1B	1.4413	0.66755	0.00163515	0.773752	Inactive	0.0658348	0.790018	0.0769231	64790000	64795000	Less activity	33.995	6.08801	0.0600748	27.907	0.546141	0.551684	0.992221	0.997737	0.99189	0.996601	0.998101	0.9997	0.00653182	19.6929	19.8672	0.946589	-0.012649	18.8791	15.0244	0.220904	0.327533
Higher RPS in Berkshire	3	73466798	ENSSSCG00000037028	GKN3	23.9347	21.2749	0.0187423	2.65977	Inactive	0.0157436	0.0157436	-	73550000	73555000	Moderate activity	24.9136	24.1479	0.84894	0.76571	0.787905	0.471403	0.99445	0.998099	1	0.99062	0.990118	0.999102	-0.00149062	14.0203	15.6712	0.688016	-0.159519	53.245	52.5529	0.874306	0.0188394
Higher RPS in Berkshire	3	73466798	ENSSSCG00000037028	GKN3	23.9347	21.2749	0.0187423	2.65977	Inactive	0.0157436	0.0157436	-	73555000	73560000	Moderate activity	21.9679	19.1193	0.842228	2.84862	0.761269	0.559156	0.99445	0.998099	1	0.945839	0.963601	1	-0.00131765	14.0203	15.6712	0.688016	-0.159519	60.728	49.2601	0.0278076	0.301391
Higher RPS in Berkshire	3	73466798	ENSSSCG00000037028	GKN3	23.9347	21.2749	0.0187423	2.65977	Inactive	0.0157436	0.0157436	-	73615000	73620000	Less activity	24.8997	7.20918	0.0503128	17.6905	0.308253	0.8029	0.99445	0.998099	1	0.995152	0.991971	1	-0.00372759	14.0203	15.6712	0.688016	-0.159519	84.7102	80.0333	0.557491	0.081835
Higher RPS in Berkshire	3	73466798	ENSSSCG00000037028	GKN3	23.9347	21.2749	0.0187423	2.65977	Inactive	0.0157436	0.0157436	-	73620000	73625000	Less activity	19.7794	14.4724	0.349653	5.30704	0.966553	0.735799	0.99445	0.998099	1	0.987126	0.987609	0.9999	-0.00357333	14.0203	15.6712	0.688016	-0.159519	74.5555	65.8664	0.263347	0.178517
Higher RPS in Berkshire	3	73466798	ENSSSCG00000037028	GKN3	23.9347	21.2749	0.0187423	2.65977	Inactive	0.0157436	0.0157436	-	73625000	73630000	Less activity	28.3774	27.6221	0.89452	0.755209	0.775501	0.969314	0.99445	0.998099	1	0.994205	0.993938	1	-0.00353065	14.0203	15.6712	0.688016	-0.159519	49.654	43.4564	0.208907	0.191928
Higher RPS in Berkshire	3	73466798	ENSSSCG00000037028	GKN3	23.9347	21.2749	0.0187423	2.65977	Inactive	0.0157436	0.0157436	-	73630000	73635000	Moderate activity	50.2036	40.1343	0.365651	10.0693	0.711894	0.873522	0.99445	0.998099	1	0.986606	0.994883	0.999767	-0.00342188	14.0203	15.6712	0.688016	-0.159519	26.1054	20.6221	0.22044	0.338695
Higher RPS in Berkshire	3	73466798	ENSSSCG00000037028	GKN3	23.9347	21.2749	0.0187423	2.65977	Inactive	0.0157436	0.0157436	-	73635000	73640000	Moderate activity	55.7656	32.0375	0.0980438	23.7281	0.734264	0.812567	0.99445	0.998099	1	0.990602	0.992332	1	-0.00332576	14.0203	15.6712	0.688016	-0.159519	51.2754	49.1832	0.574142	0.0599818
Higher RPS in Berkshire	3	73466798	ENSSSCG00000037028	GKN3	23.9347	21.2749	0.0187423	2.65977	Inactive	0.0157436	0.0157436	-	73640000	73645000	Less activity	45.6654	30.8034	0.122295	14.862	0.737982	0.663373	0.99445	0.998099	1	0.974644	0.989042	0.973844	-0.00320294	14.0203	15.6712	0.688016	-0.159519	38.5314	40.0567	0.162891	-0.0558658
Higher RPS in Berkshire	3	73466798	ENSSSCG00000037028	GKN3	23.9347	21.2749	0.0187423	2.65977	Inactive	0.0157436	0.0157436	-	73645000	73650000	Less activity	29.6607	19.204	0.12595	10.4567	0.351422	0.872283	0.99445	0.998099	1	0.98982	0.990622	1	-0.00276286	14.0203	15.6712	0.688016	-0.159519	50.9748	50.6375	0.928711	0.00955922
Higher RPS in Berkshire	3	73466798	ENSSSCG00000037028	GKN3	23.9347	21.2749	0.0187423	2.65977	Inactive	0.0157436	0.0157436	-	73655000	73660000	Less activity	28.4956	26.6522	0.546839	1.84335	0.590298	0.814516	0.99445	0.998099	1	0.99775	0.998167	1	-0.0025973	14.0203	15.6712	0.688016	-0.159519	15.116	13.8746	0.592271	0.122778
Higher RPS in Berkshire	3	73466798	ENSSSCG00000037028	GKN3	23.9347	21.2749	0.0187423	2.65977	Inactive	0.0157436	0.0157436	-	73660000	73665000	Moderate activity	30.4469	20.7661	0.218093	9.68084	0.587532	0.916837	0.99445	0.998099	1	0.973497	0.987959	0.9981	-0.00252368	14.0203	15.6712	0.688016	-0.159519	37.3136	37.3214	0.998582	-0.000298815
Higher RPS in Berkshire	3	73466798	ENSSSCG00000037028	GKN3	23.9347	21.2749	0.0187423	2.65977	Inactive	0.0157436	0.0157436	-	73665000	73670000	Moderate activity	27.3251	29.0013	0.640802	-1.67617	0.66733	0.973965	0.99445	0.998099	1	0.986203	0.98645	0.997007	-0.00247564	14.0203	15.6712	0.688016	-0.159519	46.658	46.646	0.997085	0.000370302
Higher RPS in Berkshire	3	73466798	ENSSSCG00000037028	GKN3	23.9347	21.2749	0.0187423	2.65977	Inactive	0.0157436	0.0157436	-	73670000	73675000	Moderate activity	37.8954	28.4943	0.187696	9.4011	0.715499	0.740539	0.99445	0.998099	1	0.987184	0.992505	0.9945	-0.0023825	14.0203	15.6712	0.688016	-0.159519	30.9403	38.9405	0.0987658	-0.330828
Higher RPS in Berkshire	3	73466798	ENSSSCG00000037028	GKN3	23.9347	21.2749	0.0187423	2.65977	Inactive	0.0157436	0.0157436	-	73675000	73680000	Less activity	39.0024	30.4505	0.262459	8.55183	0.943036	0.747048	0.99445	0.998099	1	0.980528	0.978379	0.9994	-0.00236463	14.0203	15.6712	0.688016	-0.159519	29.5544	21.5556	0.089669	0.453504
Higher RPS in Berkshire	3	73466798	ENSSSCG00000037028	GKN3	23.9347	21.2749	0.0187423	2.65977	Inactive	0.0157436	0.0157436	-	73680000	73685000	Less activity	28.4833	30.6765	0.816338	-2.1932	0.953677	0.768216	0.99445	0.998099	1	0.987269	0.987141	0.997205	-0.00216905	14.0203	15.6712	0.688016	-0.159519	21.4732	20.1865	0.856013	0.0887222
Higher RPS in Berkshire	3	73466798	ENSSSCG00000037028	GKN3	23.9347	21.2749	0.0187423	2.65977	Inactive	0.0157436	0.0157436	-	73685000	73690000	Less activity	28.1785	17.2978	0.0530963	10.8806	0.748326	0.940839	0.99445	0.998099	1	0.983677	0.983408	0.996115	-0.00211628	14.0203	15.6712	0.688016	-0.159519	20.2813	22.534	0.346007	-0.151246
Higher RPS in Berkshire	3	74085227	ENSSSCG00000008353	WDR92	1.45072	0.98287	0.0208341	0.467854	Active	27.1408	26.9464	0.501798	73975000	73980000	Moderate activity	31.0374	11.7684	0.0295459	19.269	0.333779	0.310831	0.992127	0.989535	0.9991	0.989961	0.988052	0.998467	0.00507143	186.732	184.406	0.535655	0.0180777	32.3238	33.2081	0.853465	-0.0388177
Higher RPS in Berkshire	3	76932647	ENSSSCG00000008360	CEP68	14.3978	13.6221	0.0202167	0.775763	Active	5.22945	5.23965	0.499513	77010000	77015000	Less activity	19.9962	15.2499	0.551133	4.74634	0.800837	0.512975	0.995801	0.995403	1	0.9988	0.999	0.999733	-0.00441667	67.9426	63.9964	0.682286	0.0861944	9.22218	8.57336	0.489586	0.104076
Higher RPS in Berkshire	3	76932647	ENSSSCG00000008360	CEP68	14.3978	13.6221	0.0202167	0.775763	Active	5.22945	5.23965	0.499513	77015000	77020000	Less activity	29.9741	14.2736	0.100604	15.7005	0.750872	0.852173	0.995801	0.995403	1	0.996851	0.995702	0.999467	-0.00413438	67.9426	63.9964	0.682286	0.0861944	17.0063	16.0897	0.870917	0.0794579
Higher RPS in Berkshire	3	76932647	ENSSSCG00000008360	CEP68	14.3978	13.6221	0.0202167	0.775763	Active	5.22945	5.23965	0.499513	77020000	77025000	Less activity	29.8753	28.2137	0.650708	1.66162	0.807987	0.680943	0.995801	0.995403	1	0.996851	0.994102	0.999867	-0.00389706	67.9426	63.9964	0.682286	0.0861944	9.92489	9.55036	0.782059	0.0549316
Higher RPS in Berkshire	3	76932647	ENSSSCG00000008360	CEP68	14.3978	13.6221	0.0202167	0.775763	Active	5.22945	5.23965	0.499513	77025000	77030000	Less activity	59.0197	38.7637	0.10187	20.256	0.767772	0.47331	0.995801	0.995403	1	0.995165	0.992331	1	-0.00365556	67.9426	63.9964	0.682286	0.0861944	17.0509	18.0045	0.695268	-0.0780641
Higher RPS in Berkshire	3	76932647	ENSSSCG00000008360	CEP68	14.3978	13.6221	0.0202167	0.775763	Active	5.22945	5.23965	0.499513	77030000	77035000	Moderate activity	79.5925	64.4379	0.0293555	15.1546	0.756641	0.414589	0.995801	0.995403	1	0.996105	0.992409	0.999867	-0.00346316	67.9426	63.9964	0.682286	0.0861944	14.1662	13.1526	0.718266	0.106327
Higher RPS in Berkshire	3	76932647	ENSSSCG00000008360	CEP68	14.3978	13.6221	0.0202167	0.775763	Active	5.22945	5.23965	0.499513	77035000	77040000	Less activity	92.9349	70.0402	0.10693	22.8947	0.766782	0.720491	0.995801	0.995403	1	0.997051	0.9977	1	-0.0032775	67.9426	63.9964	0.682286	0.0861944	25.0484	25.815	0.351425	-0.0433214
Higher RPS in Berkshire	3	76932647	ENSSSCG00000008360	CEP68	14.3978	13.6221	0.0202167	0.775763	Active	5.22945	5.23965	0.499513	77040000	77045000	Less activity	53.9344	55.824	0.757758	-1.88964	0.799026	0.94015	0.995801	0.995403	1	0.99705	0.997967	0.999733	-0.00312857	67.9426	63.9964	0.682286	0.0861944	10.1887	9.15563	0.335428	0.152662
Higher RPS in Berkshire	3	76932647	ENSSSCG00000008360	CEP68	14.3978	13.6221	0.0202167	0.775763	Active	5.22945	5.23965	0.499513	77045000	77050000	Less activity	32.5833	27.6174	0.199309	4.9659	0.656234	0.916911	0.995801	0.995403	1	0.9949	0.997998	0.999867	-0.00293182	67.9426	63.9964	0.682286	0.0861944	14.2102	12.2454	0.582583	0.213074
Higher RPS in Berkshire	3	76932647	ENSSSCG00000008360	CEP68	14.3978	13.6221	0.0202167	0.775763	Active	5.22945	5.23965	0.499513	77050000	77055000	Less activity	25.6688	25.9622	0.920822	-0.293356	0.883866	0.85145	0.995801	0.995403	1	0.993454	0.997299	0.998402	-0.00267174	67.9426	63.9964	0.682286	0.0861944	23.9648	21.5158	0.341242	0.154837
Higher RPS in Berkshire	3	93925865	ENSSSCG00000008437	SOCS5	8.67936	8.05985	0.00877498	0.619511	Active	24.8008	24.3578	0.504505	93635000	93640000	Less activity	23.5414	14.2362	0.248656	9.30517	0.4898	0.655596	0.997001	0.997634	0.9991	0.996953	0.998968	0.999867	0.000224561	152.616	167.619	0.407853	-0.135196	14.9876	13.5198	0.372583	0.147653
Higher RPS in Berkshire	3	93925865	ENSSSCG00000008437	SOCS5	8.67936	8.05985	0.00877498	0.619511	Active	24.8008	24.3578	0.504505	93640000	93645000	Less activity	28.7914	24.4213	0.422889	4.37008	0.712805	0.492005	0.997001	0.997634	0.9991	0.979874	0.9999	1	0.000221429	152.616	167.619	0.407853	-0.135196	35.8887	34.1962	0.518176	0.0694952
Higher RPS in Berkshire	3	93925865	ENSSSCG00000008437	SOCS5	8.67936	8.05985	0.00877498	0.619511	Active	24.8008	24.3578	0.504505	93645000	93650000	Less activity	30.9929	21.408	0.109896	9.58483	0.720241	0.66943	0.997001	0.997634	0.9991	0.992154	0.9995	0.9998	0.0002	152.616	167.619	0.407853	-0.135196	29.2024	25.2801	0.309086	0.20732
Higher RPS in Berkshire	3	93925865	ENSSSCG00000008437	SOCS5	8.67936	8.05985	0.00877498	0.619511	Active	24.8008	24.3578	0.504505	94060000	94065000	Less activity	19.1433	18.0339	0.78327	1.10939	0.410846	0.432863	0.997001	0.997634	0.9991	0.993457	0.996538	0.998234	0.00987115	152.616	167.619	0.407853	-0.135196	20.1925	19.9997	0.957179	0.0137715
Higher RPS in Berkshire	3	93925865	ENSSSCG00000008437	SOCS5	8.67936	8.05985	0.00877498	0.619511	Active	24.8008	24.3578	0.504505	94070000	94075000	Less activity	35.8044	32.7472	0.71355	3.05715	0.720883	0.303493	0.997001	0.997634	0.9991	0.990303	0.995702	0.997267	0.00936964	152.616	167.619	0.407853	-0.135196	33.0433	32.2678	0.899284	0.0341589
Higher RPS in Berkshire	3	93925865	ENSSSCG00000008437	SOCS5	8.67936	8.05985	0.00877498	0.619511	Active	24.8008	24.3578	0.504505	94075000	94080000	Less activity	34.9973	25.2219	0.317619	9.77544	0.659233	0.377494	0.997001	0.997634	0.9991	0.990819	0.995352	0.996624	0.00908103	152.616	167.619	0.407853	-0.135196	21.879	23.8513	0.162306	-0.123974
Higher RPS in Berkshire	3	93925881	ENSSSCG00000008440	PIGF	8.67936	8.05985	0.00877498	0.619511	Active	32.0764	36.1457	0.470176	93635000	93640000	Less activity	23.5414	14.2362	0.248656	9.30517	0.574973	0.390913	0.997001	0.997634	0.9991	0.996953	0.998968	0.999867	0.000224561	152.616	167.619	0.407853	-0.135196	14.9876	13.5198	0.372583	0.147653
Higher RPS in Berkshire	3	93925881	ENSSSCG00000008440	PIGF	8.67936	8.05985	0.00877498	0.619511	Active	32.0764	36.1457	0.470176	93640000	93645000	Less activity	28.7914	24.4213	0.422889	4.37008	0.955464	0.333901	0.997001	0.997634	0.9991	0.979874	0.9999	1	0.000221429	152.616	167.619	0.407853	-0.135196	35.8887	34.1962	0.518176	0.0694952
Higher RPS in Berkshire	3	93925881	ENSSSCG00000008440	PIGF	8.67936	8.05985	0.00877498	0.619511	Active	32.0764	36.1457	0.470176	93645000	93650000	Less activity	30.9929	21.408	0.109896	9.58483	0.694227	0.48836	0.997001	0.997634	0.9991	0.992154	0.9995	0.9998	0.0002	152.616	167.619	0.407853	-0.135196	29.2024	25.2801	0.309086	0.20732
Higher RPS in Berkshire	3	93925881	ENSSSCG00000008440	PIGF	8.67936	8.05985	0.00877498	0.619511	Active	32.0764	36.1457	0.470176	94060000	94065000	Less activity	19.1433	18.0339	0.78327	1.10939	0.420241	0.272084	0.997001	0.997634	0.9991	0.993457	0.996538	0.998234	0.00987115	152.616	167.619	0.407853	-0.135196	20.1925	19.9997	0.957179	0.0137715
Higher RPS in Berkshire	3	93925881	ENSSSCG00000008440	PIGF	8.67936	8.05985	0.00877498	0.619511	Active	32.0764	36.1457	0.470176	94070000	94075000	Less activity	35.8044	32.7472	0.71355	3.05715	0.730636	0.446507	0.997001	0.997634	0.9991	0.990303	0.995702	0.997267	0.00936964	152.616	167.619	0.407853	-0.135196	33.0433	32.2678	0.899284	0.0341589
Higher RPS in Berkshire	3	93925881	ENSSSCG00000008440	PIGF	8.67936	8.05985	0.00877498	0.619511	Active	32.0764	36.1457	0.470176	94075000	94080000	Less activity	34.9973	25.2219	0.317619	9.77544	0.677418	0.422498	0.997001	0.997634	0.9991	0.990819	0.995352	0.996624	0.00908103	152.616	167.619	0.407853	-0.135196	21.879	23.8513	0.162306	-0.123974
Higher RPS in Berkshire	3	97200406	ENSSSCG00000038549	ZFP36L2	50.9232	49.3971	0.0452881	1.52615	Active	23.8353	28.1389	0.458598	97245000	97250000	Less activity	52.6715	48.9956	0.805549	3.6759	0.977276	0.992534	0.997852	0.999101	0.9996	0.995462	0.994912	0.998071	-0.005	885.958	914.126	0.43373	-0.0451497	122.469	126.955	0.586632	-0.0518648
Higher RPS in Berkshire	3	97200406	ENSSSCG00000038549	ZFP36L2	50.9232	49.3971	0.0452881	1.52615	Active	23.8353	28.1389	0.458598	97250000	97255000	Less activity	66.6045	61.9868	0.572537	4.61772	0.995003	0.950248	0.997852	0.999101	0.9996	0.996402	0.99447	0.9991	-0.00429444	885.958	914.126	0.43373	-0.0451497	85.6774	81.8338	0.724821	0.0661384
Higher RPS in Berkshire	3	97200406	ENSSSCG00000038549	ZFP36L2	50.9232	49.3971	0.0452881	1.52615	Active	23.8353	28.1389	0.458598	97255000	97260000	Less activity	63.6443	66.67	0.583565	-3.02565	0.998174	0.99782	0.997852	0.999101	0.9996	0.978556	0.983271	0.9999	-0.00378	885.958	914.126	0.43373	-0.0451497	340.453	328.061	0.236787	0.0534728
Higher RPS in Berkshire	3	97200406	ENSSSCG00000038549	ZFP36L2	50.9232	49.3971	0.0452881	1.52615	Active	23.8353	28.1389	0.458598	97260000	97265000	Less activity	49.6258	46.5525	0.847102	3.0733	0.997321	0.989479	0.997852	0.999101	0.9996	0.991912	0.995539	0.998934	-0.00176364	885.958	914.126	0.43373	-0.0451497	136.571	133.025	0.279741	0.0379334
Higher RPS in Berkshire	3	97200406	ENSSSCG00000038549	ZFP36L2	50.9232	49.3971	0.0452881	1.52615	Active	23.8353	28.1389	0.458598	97265000	97270000	Less activity	57.8016	42.3871	0.126005	15.4145	0.998279	0.934356	0.997852	0.999101	0.9996	0.972172	0.960697	0.996526	-0.00152083	885.958	914.126	0.43373	-0.0451497	91.7492	97.2255	0.232283	-0.0835522
Higher RPS in Berkshire	3	97200406	ENSSSCG00000038549	ZFP36L2	50.9232	49.3971	0.0452881	1.52615	Active	23.8353	28.1389	0.458598	97270000	97275000	High activity	45.899	60.5116	0.262323	-14.6127	0.999186	0.91593	0.997852	0.999101	0.9996	0.987255	0.993515	0.996177	-0.00205	885.958	914.126	0.43373	-0.0451497	43.4365	51.5855	0.19496	-0.247534
Higher RPS in Berkshire	3	97200406	ENSSSCG00000038549	ZFP36L2	50.9232	49.3971	0.0452881	1.52615	Active	23.8353	28.1389	0.458598	97275000	97280000	High activity	51.2991	50.1495	0.908227	1.1496	0.981966	0.99497	0.997852	0.999101	0.9996	0.97842	0.964539	1	-0.00178571	885.958	914.126	0.43373	-0.0451497	26.521	25.6687	0.583711	0.0469468
Higher RPS in Berkshire	3	97200406	ENSSSCG00000038549	ZFP36L2	50.9232	49.3971	0.0452881	1.52615	Active	23.8353	28.1389	0.458598	97280000	97285000	High activity	66.0227	65.5753	0.96969	0.44735	0.991058	0.991979	0.997852	0.999101	0.9996	0.992053	0.994966	0.9988	-0.00264333	885.958	914.126	0.43373	-0.0451497	120.832	119.026	0.471278	0.0217077
Higher RPS in Berkshire	3	97200406	ENSSSCG00000038549	ZFP36L2	50.9232	49.3971	0.0452881	1.52615	Active	23.8353	28.1389	0.458598	97285000	97290000	High activity	89.6498	65.2324	0.0788093	24.4174	0.995057	0.991886	0.997852	0.999101	0.9996	0.989504	0.9993	0.999766	-0.00235	885.958	914.126	0.43373	-0.0451497	95.7751	100.517	0.201168	-0.0696442
Higher RPS in Berkshire	3	97200406	ENSSSCG00000038549	ZFP36L2	50.9232	49.3971	0.0452881	1.52615	Active	23.8353	28.1389	0.458598	97290000	97295000	High activity	37.11	34.6178	0.878809	2.49214	0.974383	0.996104	0.997852	0.999101	0.9996	0.989657	0.997769	0.996198	-0.0024	885.958	914.126	0.43373	-0.0451497	74.2271	80.5494	0.217048	-0.117775
Higher RPS in Berkshire	3	97200406	ENSSSCG00000038549	ZFP36L2	50.9232	49.3971	0.0452881	1.52615	Active	23.8353	28.1389	0.458598	97295000	97300000	High activity	35.7415	30.8911	0.624676	4.85048	0.833001	0.988069	0.997852	0.999101	0.9996	0.996951	0.996567	1	-0.00228333	885.958	914.126	0.43373	-0.0451497	32.0801	32.6092	0.802173	-0.023526
Higher RPS in Berkshire	3	97200406	ENSSSCG00000038549	ZFP36L2	50.9232	49.3971	0.0452881	1.52615	Active	23.8353	28.1389	0.458598	97300000	97305000	Less activity	28.8245	21.0277	0.256612	7.79681	0.97769	0.96228	0.997852	0.999101	0.9996	0.989664	0.988515	0.999733	-0.00214737	885.958	914.126	0.43373	-0.0451497	50.508	56.6609	0.0798721	-0.165531
Higher RPS in Berkshire	3	97200406	ENSSSCG00000038549	ZFP36L2	50.9232	49.3971	0.0452881	1.52615	Active	23.8353	28.1389	0.458598	97305000	97310000	Less activity	30.8423	21.0309	0.317458	9.81137	0.99491	0.988103	0.997852	0.999101	0.9996	0.993904	0.995535	0.9998	-0.001995	885.958	914.126	0.43373	-0.0451497	80.2216	64.9406	0.095842	0.304449
Higher RPS in Berkshire	3	97200406	ENSSSCG00000038549	ZFP36L2	50.9232	49.3971	0.0452881	1.52615	Active	23.8353	28.1389	0.458598	97310000	97315000	Less activity	22.1325	25.8946	0.4861	-3.76206	0.879615	0.997843	0.997852	0.999101	0.9996	0.989225	0.994007	0.999801	-0.00180238	885.958	914.126	0.43373	-0.0451497	69.0787	67.1092	0.720474	0.0416705
Higher RPS in Berkshire	3	97200406	ENSSSCG00000038549	ZFP36L2	50.9232	49.3971	0.0452881	1.52615	Active	23.8353	28.1389	0.458598	97320000	97325000	Less activity	22.8536	23.6684	0.947664	-0.814769	0.96027	0.955515	0.997852	0.999101	0.9996	0.987714	0.994541	1	-0.00327826	885.958	914.126	0.43373	-0.0451497	89.1619	75.3581	0.0221982	0.242368
Higher RPS in Berkshire	3	97200406	ENSSSCG00000038549	ZFP36L2	50.9232	49.3971	0.0452881	1.52615	Active	23.8353	28.1389	0.458598	97325000	97330000	Less activity	21.3877	18.9617	0.737574	2.42603	0.875734	0.995259	0.997852	0.999101	0.9996	0.995406	0.995505	0.9995	-0.00312083	885.958	914.126	0.43373	-0.0451497	67.9689	62.9193	0.338334	0.111203
Higher RPS in Berkshire	3	97200406	ENSSSCG00000038549	ZFP36L2	50.9232	49.3971	0.0452881	1.52615	Active	23.8353	28.1389	0.458598	97360000	97365000	Moderate activity	13.9257	20.8361	0.394193	-6.91042	0.938844	0.804872	0.997852	0.999101	0.9996	0.997501	0.997034	0.999767	-0.00228548	885.958	914.126	0.43373	-0.0451497	30.6384	34.1249	0.616402	-0.155004
Higher RPS in Berkshire	3	97200406	ENSSSCG00000038549	ZFP36L2	50.9232	49.3971	0.0452881	1.52615	Active	23.8353	28.1389	0.458598	97365000	97370000	Moderate activity	18.7273	26.8095	0.0112369	-8.08222	0.85616	0.993025	0.997852	0.999101	0.9996	0.993129	0.990172	0.997834	-0.0022125	885.958	914.126	0.43373	-0.0451497	49.8352	58.4124	0.0510631	-0.228687
Higher RPS in Berkshire	3	97200406	ENSSSCG00000038549	ZFP36L2	50.9232	49.3971	0.0452881	1.52615	Active	23.8353	28.1389	0.458598	97370000	97375000	Less activity	27.2924	24.0428	0.601135	3.24954	0.980766	0.910304	0.997852	0.999101	0.9996	0.955251	0.916384	0.998568	-0.00213636	885.958	914.126	0.43373	-0.0451497	21.7107	26.3038	0.293883	-0.275708
Higher RPS in Berkshire	3	97200406	ENSSSCG00000038549	ZFP36L2	50.9232	49.3971	0.0452881	1.52615	Active	23.8353	28.1389	0.458598	97375000	97380000	Less activity	32.9553	26.151	0.178957	6.80422	0.997524	0.864423	0.997852	0.999101	0.9996	0.985969	0.988892	0.996159	-0.00320735	885.958	914.126	0.43373	-0.0451497	73.2551	78.6785	0.413535	-0.102904
Higher RPS in Berkshire	3	97200406	ENSSSCG00000038549	ZFP36L2	50.9232	49.3971	0.0452881	1.52615	Active	23.8353	28.1389	0.458598	97380000	97385000	Less activity	40.5731	30.9631	0.374708	9.61002	0.996334	0.956902	0.997852	0.999101	0.9996	0.98958	0.993999	0.991306	-0.00339143	885.958	914.126	0.43373	-0.0451497	78.2241	76.8141	0.191892	0.0262091
Higher RPS in Berkshire	3	97200406	ENSSSCG00000038549	ZFP36L2	50.9232	49.3971	0.0452881	1.52615	Active	23.8353	28.1389	0.458598	97385000	97390000	Less activity	24.4169	22.3586	0.721349	2.0583	0.991564	0.910782	0.997852	0.999101	0.9996	0.984687	0.988414	0.97885	-0.0032875	885.958	914.126	0.43373	-0.0451497	38.0895	34.0023	0.449929	0.163307
Higher RPS in Berkshire	3	97200406	ENSSSCG00000038549	ZFP36L2	50.9232	49.3971	0.0452881	1.52615	Active	23.8353	28.1389	0.458598	97390000	97395000	Less activity	25.5272	17.8825	0.0540528	7.64469	0.989206	0.989235	0.997852	0.999101	0.9996	0.993417	0.995809	0.995677	-0.00328784	885.958	914.126	0.43373	-0.0451497	44.4858	47.9497	0.516332	-0.107942
Higher RPS in Berkshire	3	97200406	ENSSSCG00000038549	ZFP36L2	50.9232	49.3971	0.0452881	1.52615	Active	23.8353	28.1389	0.458598	97400000	97405000	Less activity	35.5053	25.3163	0.388386	10.189	0.99899	0.904763	0.997852	0.999101	0.9996	0.991201	0.992004	0.993051	-0.00308462	885.958	914.126	0.43373	-0.0451497	100.936	101.574	0.936896	-0.00908531
Higher RPS in Berkshire	3	97200406	ENSSSCG00000038549	ZFP36L2	50.9232	49.3971	0.0452881	1.52615	Active	23.8353	28.1389	0.458598	97405000	97410000	Less activity	29.5882	41.8491	0.426703	-12.2609	0.995512	0.933247	0.997852	0.999101	0.9996	0.994477	0.995335	0.99347	-0.00305375	885.958	914.126	0.43373	-0.0451497	37.014	40.8755	0.305634	-0.142796
Higher RPS in Berkshire	3	97200406	ENSSSCG00000038549	ZFP36L2	50.9232	49.3971	0.0452881	1.52615	Active	23.8353	28.1389	0.458598	97410000	97415000	Less activity	40.2802	34.4224	0.154487	5.85771	0.995215	0.988333	0.997852	0.999101	0.9996	0.988835	0.994357	0.987084	-0.0029561	885.958	914.126	0.43373	-0.0451497	226.948	250.411	0.0717645	-0.141873
Higher RPS in Berkshire	3	97200406	ENSSSCG00000038549	ZFP36L2	50.9232	49.3971	0.0452881	1.52615	Active	23.8353	28.1389	0.458598	97415000	97420000	Less activity	32.6672	27.3737	0.500868	5.2935	0.975892	0.987867	0.997852	0.999101	0.9996	0.990968	0.993845	0.990187	-0.00287381	885.958	914.126	0.43373	-0.0451497	81.2498	86.4508	0.560453	-0.0894088
Higher RPS in Berkshire	3	97200406	ENSSSCG00000038549	ZFP36L2	50.9232	49.3971	0.0452881	1.52615	Active	23.8353	28.1389	0.458598	97420000	97425000	High activity	42.036	23.588	0.0169679	18.448	0.998315	0.987585	0.997852	0.999101	0.9996	0.997006	0.998104	0.996009	-0.00280581	885.958	914.126	0.43373	-0.0451497	32.255	31.2597	0.775302	0.0450758
Higher RPS in Berkshire	3	97200406	ENSSSCG00000038549	ZFP36L2	50.9232	49.3971	0.0452881	1.52615	Active	23.8353	28.1389	0.458598	97425000	97430000	High activity	29.7345	28.6198	0.636158	1.11471	0.926975	0.988601	0.997852	0.999101	0.9996	0.995704	0.992141	0.999433	-0.00273068	885.958	914.126	0.43373	-0.0451497	22.5966	20.1089	0.248142	0.167484
Higher RPS in Berkshire	3	97200406	ENSSSCG00000038549	ZFP36L2	50.9232	49.3971	0.0452881	1.52615	Active	23.8353	28.1389	0.458598	97430000	97435000	High activity	11.7544	16.3872	0.548251	-4.6328	0.806856	0.99785	0.997852	0.999101	0.9996	0.997504	0.997271	0.996872	-0.00274778	885.958	914.126	0.43373	-0.0451497	46.6078	44.0485	0.628816	0.0812967
Higher RPS in Berkshire	3	97200406	ENSSSCG00000038549	ZFP36L2	50.9232	49.3971	0.0452881	1.52615	Active	23.8353	28.1389	0.458598	97435000	97440000	High activity	12.6133	22.8772	0.166274	-10.2639	0.722234	0.975843	0.997852	0.999101	0.9996	0.967759	0.958242	0.957746	-0.00269022	885.958	914.126	0.43373	-0.0451497	37.3449	35.7983	0.41076	0.0608527
Higher RPS in Berkshire	3	97200406	ENSSSCG00000038549	ZFP36L2	50.9232	49.3971	0.0452881	1.52615	Active	23.8353	28.1389	0.458598	97440000	97445000	High activity	28.7934	16.6621	0.377184	12.1313	0.99435	0.91665	0.997852	0.999101	0.9996	0.998751	0.998801	0.999001	-0.00263404	885.958	914.126	0.43373	-0.0451497	11.4632	10.3973	0.330368	0.13952
Higher RPS in Berkshire	3	97200406	ENSSSCG00000038549	ZFP36L2	50.9232	49.3971	0.0452881	1.52615	Active	23.8353	28.1389	0.458598	97445000	97450000	High activity	20.0283	10.0116	0.130744	10.0167	0.990389	0.928237	0.997852	0.999101	0.9996	0.99805	0.998267	0.9983	-0.00258437	885.958	914.126	0.43373	-0.0451497	28.465	24.0004	0.0716873	0.245192
Higher RPS in Berkshire	3	97200406	ENSSSCG00000038549	ZFP36L2	50.9232	49.3971	0.0452881	1.52615	Active	23.8353	28.1389	0.458598	97515000	97520000	High activity	14.07	17.1659	0.724243	-3.09595	0.856604	0.951562	0.997852	0.999101	0.9996	0.9978	0.996867	0.999867	-0.000908871	885.958	914.126	0.43373	-0.0451497	16.8678	16.0457	0.507126	0.0716552
Higher RPS in Berkshire	3	106724934	ENSSSCG00000008510	LTBP1	12.0409	11.1945	0.0137873	0.846391	Active	33.4221	37.0741	0.474098	106600000	106605000	Moderate activity	15.5583	0	0.190563	15.5583	0.937809	0.793	0.990902	0.992389	0.994713	0.995737	0.999318	0.994543	-0.0011	151.351	171.439	0.265262	-0.179682	2.90131	3.73144	0.365014	-0.352297
Higher RPS in Berkshire	3	106724934	ENSSSCG00000008510	LTBP1	12.0409	11.1945	0.0137873	0.846391	Active	33.4221	37.0741	0.474098	106835000	106840000	Moderate activity	19.6359	19.9348	0.953505	-0.298941	0.876642	0.962261	0.990902	0.992389	0.994713	0.989265	0.992051	0.997699	0.0137409	151.351	171.439	0.265262	-0.179682	32.2411	35.7296	0.106637	-0.147784
Higher RPS in Berkshire	3	106724934	ENSSSCG00000008510	LTBP1	12.0409	11.1945	0.0137873	0.846391	Active	33.4221	37.0741	0.474098	106840000	106845000	Less activity	11.5429	19.4154	0.357967	-7.87248	0.741417	0.685204	0.990902	0.992389	0.994713	0.958789	0.922506	0.999667	0.0131239	151.351	171.439	0.265262	-0.179682	15.8489	12.2505	0.047229	0.368885
Higher RPS in Berkshire	3	106724934	ENSSSCG00000008510	LTBP1	12.0409	11.1945	0.0137873	0.846391	Active	33.4221	37.0741	0.474098	106845000	106850000	Less activity	21.7745	25.3341	0.606544	-3.5596	0.967522	0.716587	0.990902	0.992389	0.994713	0.954077	0.935461	1	0.0138458	151.351	171.439	0.265262	-0.179682	13.6946	9.79438	0.353937	0.479426
Higher RPS in Berkshire	3	106724934	ENSSSCG00000008510	LTBP1	12.0409	11.1945	0.0137873	0.846391	Active	33.4221	37.0741	0.474098	106850000	106855000	Moderate activity	31.3044	28.5129	0.696941	2.79152	0.597909	0.969199	0.990902	0.992389	0.994713	0.985822	0.977199	0.9997	0.01162	151.351	171.439	0.265262	-0.179682	17.7793	18.2652	0.723622	-0.0386899
Higher RPS in Berkshire	3	106724934	ENSSSCG00000008510	LTBP1	12.0409	11.1945	0.0137873	0.846391	Active	33.4221	37.0741	0.474098	106855000	106860000	Moderate activity	57.9485	49.9328	0.295213	8.01574	0.833847	0.917613	0.990902	0.992389	0.994713	0.957989	0.959217	0.968889	0.011125	151.351	171.439	0.265262	-0.179682	32.5172	43.5066	0.223794	-0.418914
Higher RPS in Berkshire	3	106724934	ENSSSCG00000008510	LTBP1	12.0409	11.1945	0.0137873	0.846391	Active	33.4221	37.0741	0.474098	106860000	106865000	Moderate activity	33.2622	35.6257	0.759962	-2.36351	0.898422	0.942023	0.990902	0.992389	0.994713	0.997504	0.996273	0.998902	0.0117111	151.351	171.439	0.265262	-0.179682	18.2044	19.6403	0.658452	-0.108954
Higher RPS in Berkshire	3	106724934	ENSSSCG00000008510	LTBP1	12.0409	11.1945	0.0137873	0.846391	Active	33.4221	37.0741	0.474098	106865000	106870000	Less activity	27.5812	21.2566	0.393094	6.32458	0.898448	0.927624	0.990902	0.992389	0.994713	0.996457	0.994645	0.998802	0.0112839	151.351	171.439	0.265262	-0.179682	12.6097	12.4064	0.925485	0.023256
Higher RPS in Berkshire	3	106724934	ENSSSCG00000008510	LTBP1	12.0409	11.1945	0.0137873	0.846391	Active	33.4221	37.0741	0.474098	106870000	106875000	Less activity	21.3907	16.7534	0.141262	4.63736	0.78041	0.824534	0.990902	0.992389	0.994713	0.984982	0.971239	0.9996	0.0108776	151.351	171.439	0.265262	-0.179682	13.1761	9.59122	0.27315	0.454076
Higher RPS in Berkshire	3	110433373	ENSSSCG00000008538	SPDYA	2.38504	1.04932	0.014785	1.33571	Active	-	-	-	110325000	110330000	Less activity	18.7652	3.82497	0.0245784	14.9402	0.496084	0.745455	0.994871	0.995187	0.996746	0.936084	0.99662	0.996605	0.00279	143.436	155.822	0.585221	-0.119411	20.0842	20.3592	0.910852	-0.0195216
Higher RPS in Berkshire	3	110433373	ENSSSCG00000008538	SPDYA	2.38504	1.04932	0.014785	1.33571	Active	-	-	-	110335000	110340000	Less activity	15.9571	3.79003	0.147412	12.1671	0.590348	0.477884	0.994871	0.995187	0.996746	0.985808	0.987525	0.999334	0.00285278	143.436	155.822	0.585221	-0.119411	25.4159	27.2987	0.239189	-0.102709
Higher RPS in Berkshire	3	113229175	ENSSSCG00000008576	Unknown	12.5484	11.1966	0.00347881	1.35183	Active	19.2883	11.7308	0.62182	113285000	113290000	Less activity	30.8789	22.5146	0.270921	8.36426	0.846034	0.981793	0.981553	0.968736	0.998401	0.997003	0.996737	0.9992	-0.00354091	223.984	207.095	0.192586	0.113054	24.8415	24.1575	0.433953	0.0401176
Higher RPS in Berkshire	3	113229175	ENSSSCG00000008576	Unknown	12.5484	11.1966	0.00347881	1.35183	Active	19.2883	11.7308	0.62182	113290000	113295000	Less activity	49.4777	44.1759	0.505007	5.30182	0.838777	0.766604	0.981553	0.968736	0.998401	0.976664	0.955897	0.9993	-0.00330833	223.984	207.095	0.192586	0.113054	54.1224	48.6995	0.535945	0.152023
Higher RPS in Berkshire	3	113229175	ENSSSCG00000008576	Unknown	12.5484	11.1966	0.00347881	1.35183	Active	19.2883	11.7308	0.62182	113295000	113300000	Less activity	66.5317	47.7104	0.190251	18.8214	0.605802	0.77298	0.981553	0.968736	0.998401	0.949106	0.931865	1	-0.00190769	223.984	207.095	0.192586	0.113054	23.4823	22.1633	0.42221	0.0830371
Higher RPS in Berkshire	3	113229175	ENSSSCG00000008576	Unknown	12.5484	11.1966	0.00347881	1.35183	Active	19.2883	11.7308	0.62182	113300000	113305000	Moderate activity	44.6548	33.1257	0.341505	11.5291	0.550258	0.872395	0.981553	0.968736	0.998401	0.992771	0.98798	0.9995	-0.00521786	223.984	207.095	0.192586	0.113054	14.9128	18.9344	0.458807	-0.342416
Higher RPS in Berkshire	3	113229175	ENSSSCG00000008576	Unknown	12.5484	11.1966	0.00347881	1.35183	Active	19.2883	11.7308	0.62182	113305000	113310000	Moderate activity	44.8566	31.8586	0.367378	12.998	0.682165	0.835778	0.981553	0.968736	0.998401	0.946426	0.965179	0.9996	-0.00491333	223.984	207.095	0.192586	0.113054	27.7775	30.4165	0.716116	-0.130489
Higher RPS in Berkshire	3	113229175	ENSSSCG00000008576	Unknown	12.5484	11.1966	0.00347881	1.35183	Active	19.2883	11.7308	0.62182	113310000	113315000	Moderate activity	27.1209	17.109	0.00692362	10.0119	0.857797	0.729293	0.981553	0.968736	0.998401	0.666047	0.778028	0.999002	-0.00209688	223.984	207.095	0.192586	0.113054	24.4434	19.6633	0.00544946	0.312515
Higher RPS in Berkshire	3	113229175	ENSSSCG00000008576	Unknown	12.5484	11.1966	0.00347881	1.35183	Active	19.2883	11.7308	0.62182	113320000	113325000	Less activity	26.4391	20.5534	0.213672	5.88579	0.870544	0.747807	0.981553	0.968736	0.998401	0.963813	0.966998	1	-0.0288722	223.984	207.095	0.192586	0.113054	39.6546	31.6675	0.102231	0.32357
Higher RPS in Berkshire	3	113229175	ENSSSCG00000008576	Unknown	12.5484	11.1966	0.00347881	1.35183	Active	19.2883	11.7308	0.62182	113325000	113330000	Less activity	22.2328	11.6145	0.0278757	10.6183	0.776661	0.846658	0.981553	0.968736	0.998401	0.984434	0.998373	1	-0.0258026	223.984	207.095	0.192586	0.113054	40.4998	35.2399	0.44775	0.200175
Higher RPS in Berkshire	3	114577956	ENSSSCG00000008584	AC008073.3	13.7969	12.6164	0.00643152	1.18049	Active	14.5613	9.32603	0.609582	114715000	114720000	Moderate activity	29.1246	25.4406	0.233074	3.68402	0.969076	0.740509	0.993008	0.995269	1	0.990609	0.993409	1	-0.0130685	130.484	136.382	0.474454	-0.0637346	28.2763	29.2233	0.644805	-0.047361
Higher RPS in Berkshire	3	114577956	ENSSSCG00000008584	AC008073.3	13.7969	12.6164	0.00643152	1.18049	Active	14.5613	9.32603	0.609582	114725000	114730000	Less activity	30.1881	22.1973	0.193283	7.99075	0.961882	0.647044	0.993008	0.995269	1	0.996105	0.996139	1	-0.0119431	130.484	136.382	0.474454	-0.0637346	11.205	11.8541	0.492804	-0.0805442
Higher RPS in Berkshire	3	114577956	ENSSSCG00000008584	AC008073.3	13.7969	12.6164	0.00643152	1.18049	Active	14.5613	9.32603	0.609582	114730000	114735000	Moderate activity	17.762	20.8835	0.365259	-3.12152	0.975277	0.699881	0.993008	0.995269	1	0.997251	0.9971	1	-0.01154	130.484	136.382	0.474454	-0.0637346	13.1715	12.1352	0.581192	0.117292
Higher RPS in Berkshire	3	114577956	ENSSSCG00000008584	AC008073.3	13.7969	12.6164	0.00643152	1.18049	Active	14.5613	9.32603	0.609582	114735000	114740000	Moderate activity	24.7016	15.0856	0.0635818	9.616	0.985759	0.690414	0.993008	0.995269	1	0.997352	0.998635	1	-0.0111355	130.484	136.382	0.474454	-0.0637346	25.8077	23.3145	0.508671	0.14598
Higher RPS in Berkshire	3	114577956	ENSSSCG00000008584	AC008073.3	13.7969	12.6164	0.00643152	1.18049	Active	14.5613	9.32603	0.609582	114740000	114745000	Moderate activity	22.9224	13.4697	0.167842	9.4527	0.975595	0.727795	0.993008	0.995269	1	0.994857	0.993912	1	-0.0108141	130.484	136.382	0.474454	-0.0637346	16.0059	13.1213	0.0235445	0.284728
Higher RPS in Berkshire	3	114577956	ENSSSCG00000008584	AC008073.3	13.7969	12.6164	0.00643152	1.18049	Active	14.5613	9.32603	0.609582	114755000	114760000	Less activity	17.888	14.5877	0.69329	3.30024	0.935477	0.687559	0.993008	0.995269	1	0.9981	0.997999	1	-0.0103357	130.484	136.382	0.474454	-0.0637346	9.78203	9.37775	0.674091	0.0602632
Higher RPS in Berkshire	3	114577956	ENSSSCG00000008584	AC008073.3	13.7969	12.6164	0.00643152	1.18049	Active	14.5613	9.32603	0.609582	114770000	114775000	Less activity	24.8631	17.0598	0.127172	7.80335	0.988892	0.517371	0.993008	0.995269	1	0.997202	0.995071	1	-0.00935	130.484	136.382	0.474454	-0.0637346	8.61195	6.52522	0.346055	0.395026
Higher RPS in Berkshire	3	114577956	ENSSSCG00000008584	AC008073.3	13.7969	12.6164	0.00643152	1.18049	Active	14.5613	9.32603	0.609582	114775000	114780000	Less activity	26.3011	18.1703	0.157368	8.13089	0.990647	0.958782	0.993008	0.995269	1	0.99895	0.998167	1	-0.00908718	130.484	136.382	0.474454	-0.0637346	5.05997	4.81111	0.867216	0.0713133
Higher RPS in Berkshire	3	114577956	ENSSSCG00000008584	AC008073.3	13.7969	12.6164	0.00643152	1.18049	Active	14.5613	9.32603	0.609582	114780000	114785000	Less activity	29.8914	19.7077	0.391159	10.1837	0.990966	0.991811	0.993008	0.995269	1	0.994651	0.993031	1	-0.00885	130.484	136.382	0.474454	-0.0637346	11.7299	10.86	0.629073	0.110188
Higher RPS in Berkshire	3	114577956	ENSSSCG00000008584	AC008073.3	13.7969	12.6164	0.00643152	1.18049	Active	14.5613	9.32603	0.609582	114785000	114790000	Less activity	20.1019	19.6297	0.908759	0.4722	0.932671	0.810538	0.993008	0.995269	1	0.996602	0.995137	1	-0.0085622	130.484	136.382	0.474454	-0.0637346	11.7447	9.4469	0.275785	0.311135
Higher RPS in Berkshire	3	114578187	ENSSSCG00000008585	PFN4	13.7969	12.6164	0.00643152	1.18049	Active	-	-	-	114715000	114720000	Moderate activity	29.1246	25.4406	0.233074	3.68402	0.908634	0.575963	0.993008	0.995269	1	0.990609	0.993409	1	-0.0130685	130.484	136.382	0.474454	-0.0637346	28.2763	29.2233	0.644805	-0.047361
Higher RPS in Berkshire	3	114578187	ENSSSCG00000008585	PFN4	13.7969	12.6164	0.00643152	1.18049	Active	-	-	-	114725000	114730000	Less activity	30.1881	22.1973	0.193283	7.99075	0.876087	0.892779	0.993008	0.995269	1	0.996105	0.996139	1	-0.0119431	130.484	136.382	0.474454	-0.0637346	11.205	11.8541	0.492804	-0.0805442
Higher RPS in Berkshire	3	114578187	ENSSSCG00000008585	PFN4	13.7969	12.6164	0.00643152	1.18049	Active	-	-	-	114730000	114735000	Moderate activity	17.762	20.8835	0.365259	-3.12152	0.760301	0.840931	0.993008	0.995269	1	0.997251	0.9971	1	-0.01154	130.484	136.382	0.474454	-0.0637346	13.1715	12.1352	0.581192	0.117292
Higher RPS in Berkshire	3	114578187	ENSSSCG00000008585	PFN4	13.7969	12.6164	0.00643152	1.18049	Active	-	-	-	114735000	114740000	Moderate activity	24.7016	15.0856	0.0635818	9.616	0.933136	0.884277	0.993008	0.995269	1	0.997352	0.998635	1	-0.0111355	130.484	136.382	0.474454	-0.0637346	25.8077	23.3145	0.508671	0.14598
Higher RPS in Berkshire	3	114578187	ENSSSCG00000008585	PFN4	13.7969	12.6164	0.00643152	1.18049	Active	-	-	-	114740000	114745000	Moderate activity	22.9224	13.4697	0.167842	9.4527	0.975448	0.963845	0.993008	0.995269	1	0.994857	0.993912	1	-0.0108141	130.484	136.382	0.474454	-0.0637346	16.0059	13.1213	0.0235445	0.284728
Higher RPS in Berkshire	3	114578187	ENSSSCG00000008585	PFN4	13.7969	12.6164	0.00643152	1.18049	Active	-	-	-	114755000	114760000	Less activity	17.888	14.5877	0.69329	3.30024	0.580557	0.539038	0.993008	0.995269	1	0.9981	0.997999	1	-0.0103357	130.484	136.382	0.474454	-0.0637346	9.78203	9.37775	0.674091	0.0602632
Higher RPS in Berkshire	3	114578187	ENSSSCG00000008585	PFN4	13.7969	12.6164	0.00643152	1.18049	Active	-	-	-	114770000	114775000	Less activity	24.8631	17.0598	0.127172	7.80335	0.967362	0.723178	0.993008	0.995269	1	0.997202	0.995071	1	-0.00935	130.484	136.382	0.474454	-0.0637346	8.61195	6.52522	0.346055	0.395026
Higher RPS in Berkshire	3	114578187	ENSSSCG00000008585	PFN4	13.7969	12.6164	0.00643152	1.18049	Active	-	-	-	114775000	114780000	Less activity	26.3011	18.1703	0.157368	8.13089	0.933498	0.925683	0.993008	0.995269	1	0.99895	0.998167	1	-0.00908718	130.484	136.382	0.474454	-0.0637346	5.05997	4.81111	0.867216	0.0713133
Higher RPS in Berkshire	3	114578187	ENSSSCG00000008585	PFN4	13.7969	12.6164	0.00643152	1.18049	Active	-	-	-	114780000	114785000	Less activity	29.8914	19.7077	0.391159	10.1837	0.962696	0.740579	0.993008	0.995269	1	0.994651	0.993031	1	-0.00885	130.484	136.382	0.474454	-0.0637346	11.7299	10.86	0.629073	0.110188
Higher RPS in Berkshire	3	114578187	ENSSSCG00000008585	PFN4	13.7969	12.6164	0.00643152	1.18049	Active	-	-	-	114785000	114790000	Less activity	20.1019	19.6297	0.908759	0.4722	0.737871	0.830442	0.993008	0.995269	1	0.996602	0.995137	1	-0.0085622	130.484	136.382	0.474454	-0.0637346	11.7447	9.4469	0.275785	0.311135
Higher RPS in Berkshire	3	115967050	ENSSSCG00000049418	Unknown	39.5929	27.1519	0.0469783	12.441	Inactive	0.107909	0.107909	-	114950000	114955000	Less activity	11.0686	17.6727	0.391251	-6.6041	0.268738	0	-0.0002	0	1	0.98628	0.986357	0.996873	0.00633193	0	0	NA	-	32.1634	34.7831	0.331096	-0.11263
Higher RPS in Berkshire	3	115967050	ENSSSCG00000049418	Unknown	39.5929	27.1519	0.0469783	12.441	Inactive	0.107909	0.107909	-	115120000	115125000	Less activity	0	29.2897	0.18169	-29.2897	0.715975	0	-0.0002	0	1	0.988409	0.995934	0.998001	0.00643899	0	0	NA	-	31.8154	33.2991	0.372981	-0.0655576
Higher RPS in Berkshire	3	115967050	ENSSSCG00000049418	Unknown	39.5929	27.1519	0.0469783	12.441	Inactive	0.107909	0.107909	-	115410000	115415000	Less activity	20.2372	0	0.188851	20.2372	0.993181	0	-0.0002	0	1	0.995252	0.996701	1	0.00734818	0	0	NA	-	12.9203	13.535	0.393672	-0.0665515
Higher RPS in Berkshire	3	115967050	ENSSSCG00000049418	Unknown	39.5929	27.1519	0.0469783	12.441	Inactive	0.107909	0.107909	-	115430000	115435000	Less activity	33.8669	0	0.222744	33.8669	0.9921	0	-0.0002	0	1	0.997102	0.997603	1	0.00762123	0	0	NA	-	14.0131	15.9589	0.117413	-0.186339
Higher RPS in Berkshire	3	115967050	ENSSSCG00000049418	Unknown	39.5929	27.1519	0.0469783	12.441	Inactive	0.107909	0.107909	-	115435000	115440000	Less activity	14.1726	18.2806	0.887089	-4.10793	0.991331	0	-0.0002	0	1	0.997352	0.998867	0.9999	0.00769571	0	0	NA	-	10.456	7.7545	0.0870401	0.426478
Higher RPS in Berkshire	3	115967050	ENSSSCG00000049418	Unknown	39.5929	27.1519	0.0469783	12.441	Inactive	0.107909	0.107909	-	115465000	115470000	Less activity	18.1836	0	0.190665	18.1836	0.860065	0	-0.0002	0	1	0.992982	0.998971	1	0.00821061	0	0	NA	-	16.9354	16.8506	0.984474	0.00719735
Higher RPS in Berkshire	3	115967050	ENSSSCG00000049418	Unknown	39.5929	27.1519	0.0469783	12.441	Inactive	0.107909	0.107909	-	115630000	115635000	Less activity	15.9381	0	0.183707	15.9381	0.969329	0	-0.0002	0	1	0.994755	0.996707	1	0.0104909	0	0	NA	-	21.8015	20.6763	0.608662	0.0760926
Higher RPS in Berkshire	3	115967050	ENSSSCG00000049418	Unknown	39.5929	27.1519	0.0469783	12.441	Inactive	0.107909	0.107909	-	115690000	115695000	Less activity	22.1056	0	0.183382	22.1056	0.998855	0	-0.0002	0	1	0.99391	0.993248	0.996072	0.0129972	0	0	NA	-	18.7703	17.6732	0.695217	0.086412
Higher RPS in Berkshire	3	115967050	ENSSSCG00000049418	Unknown	39.5929	27.1519	0.0469783	12.441	Inactive	0.107909	0.107909	-	115805000	115810000	Less activity	13.3974	0	0.186083	13.3974	0.999871	0	-0.0002	0	1	0.99675	0.9976	0.999767	0.0164919	0	0	NA	-	9.76334	13.5236	0.12613	-0.465963
Higher RPS in Berkshire	3	115967050	ENSSSCG00000049418	Unknown	39.5929	27.1519	0.0469783	12.441	Inactive	0.107909	0.107909	-	115855000	115860000	Less activity	8.44475	21.1228	0.649847	-12.6781	0.97178	0	-0.0002	0	1	0.99465	0.9962	0.9999	0.0241167	0	0	NA	-	14.6441	18.4742	0.0189954	-0.333157
Higher RPS in Berkshire	3	115967050	ENSSSCG00000049418	Unknown	39.5929	27.1519	0.0469783	12.441	Inactive	0.107909	0.107909	-	115860000	115865000	Less activity	42.8443	3.93513	0.146177	38.9092	0.994816	0	-0.0002	0	1	0.988867	0.993011	0.999567	0.0253025	0	0	NA	-	20.7469	22.3619	0.414815	-0.107646
Higher RPS in Berkshire	3	115967050	ENSSSCG00000049418	Unknown	39.5929	27.1519	0.0469783	12.441	Inactive	0.107909	0.107909	-	115865000	115870000	Less activity	9.10413	20.8774	0.54879	-11.7732	0.991513	0	-0.0002	0	1	0.947288	0.997431	0.9999	0.0293184	0	0	NA	-	19.2975	16.5493	0.0699923	0.22041
Higher RPS in Berkshire	3	115967050	ENSSSCG00000049418	Unknown	39.5929	27.1519	0.0469783	12.441	Inactive	0.107909	0.107909	-	115870000	115875000	Less activity	20.5362	21.4683	0.958905	-0.932082	0.998997	0	-0.0002	0	1	0.996552	0.995904	0.9994	0.0309944	0	0	NA	-	12.9271	11.3605	0.127107	0.184838
Higher RPS in Berkshire	3	115967050	ENSSSCG00000049418	Unknown	39.5929	27.1519	0.0469783	12.441	Inactive	0.107909	0.107909	-	115885000	115890000	Less activity	8.89995	16.3253	0.747467	-7.42531	0.992157	0	-0.0002	0	1	0.9981	0.9983	0.9999	0.0371967	0	0	NA	-	5.36097	5.14015	0.701516	0.0595491
Higher RPS in Berkshire	3	115967050	ENSSSCG00000049418	Unknown	39.5929	27.1519	0.0469783	12.441	Inactive	0.107909	0.107909	-	115890000	115895000	Less activity	0	69.9475	0.217025	-69.9475	0.99853	0	-0.0002	0	1	0.995877	0.998	0.9999	0.0398036	0	0	NA	-	12.1367	12.3216	0.940112	-0.0216374
Higher RPS in Berkshire	3	115967050	ENSSSCG00000049418	Unknown	39.5929	27.1519	0.0469783	12.441	Inactive	0.107909	0.107909	-	115895000	115900000	Less activity	9.8548	26.4449	0.631221	-16.5901	0.997838	0	-0.0002	0	1	0.878971	0.919381	1	0.0341308	0	0	NA	-	17.2978	12.1727	0.035744	0.503454
Higher RPS in Berkshire	3	115967050	ENSSSCG00000049418	Unknown	39.5929	27.1519	0.0469783	12.441	Inactive	0.107909	0.107909	-	115900000	115905000	Less activity	0	80.0869	0.0769818	-80.0869	0.982965	0	-0.0002	0	1	0.994751	0.996601	0.9999	0.0369792	0	0	NA	-	13.1918	14.2696	0.549298	-0.112482
Higher RPS in Berkshire	3	115967050	ENSSSCG00000049418	Unknown	39.5929	27.1519	0.0469783	12.441	Inactive	0.107909	0.107909	-	115905000	115910000	Less activity	35.265	22.7822	0.766539	12.4828	0.999529	0	-0.0002	0	1	0.9968	0.998	0.9998	0.0403409	0	0	NA	-	9.91118	10.5633	0.844667	-0.0910487
Higher RPS in Berkshire	3	115967050	ENSSSCG00000049418	Unknown	39.5929	27.1519	0.0469783	12.441	Inactive	0.107909	0.107909	-	115910000	115915000	Less activity	36.1312	16.6336	0.538675	19.4976	0.962898	0	-0.0002	0	1	0.993015	0.9907	0.9998	0.04432	0	0	NA	-	15.0355	13.054	0.546594	0.202432
Higher RPS in Berkshire	3	115967050	ENSSSCG00000049418	Unknown	39.5929	27.1519	0.0469783	12.441	Inactive	0.107909	0.107909	-	115915000	115920000	Less activity	47.7854	8.62382	0.246413	39.1616	0.999441	0	-0.0002	0	1	0.943924	0.96273	0.9999	0.0544611	0	0	NA	-	16.4618	15.2407	0.514216	0.1105
Higher RPS in Berkshire	3	115967050	ENSSSCG00000049418	Unknown	39.5929	27.1519	0.0469783	12.441	Inactive	0.107909	0.107909	-	115925000	115930000	Less activity	28.7481	7.73368	0.225453	21.0144	0.999891	0	-0.0002	0	1	0.994552	0.997001	0.999767	0.0699571	0	0	NA	-	13.0949	15.0596	0.148026	-0.200254
Higher RPS in Berkshire	3	115967050	ENSSSCG00000049418	Unknown	39.5929	27.1519	0.0469783	12.441	Inactive	0.107909	0.107909	-	115930000	115935000	Less activity	35.1137	10.633	0.351942	24.4807	0.997348	0	-0.0002	0	1	0.980678	0.99642	0.970799	0.0842167	0	0	NA	-	14.055	13.3755	0.830336	0.0709789
Higher RPS in Berkshire	3	115967050	ENSSSCG00000049418	Unknown	39.5929	27.1519	0.0469783	12.441	Inactive	0.107909	0.107909	-	115990000	115995000	Less activity	56.726	8.68094	0.1255	48.0451	0.99382	0	-0.0002	0	1	0.994703	0.997401	0.999334	0.0555125	0	0	NA	-	17.3852	17.3823	0.998926	0.000239298
Higher RPS in Berkshire	3	115967050	ENSSSCG00000049418	Unknown	39.5929	27.1519	0.0469783	12.441	Inactive	0.107909	0.107909	-	116000000	116005000	Less activity	44.0412	15.3974	0.435294	28.6438	0.994071	0	-0.0002	0	1	0.995379	0.993575	0.9997	0.03715	0	0	NA	-	14.2048	13.4963	0.78243	0.0732875
Higher RPS in Berkshire	3	115967050	ENSSSCG00000049418	Unknown	39.5929	27.1519	0.0469783	12.441	Inactive	0.107909	0.107909	-	116005000	116010000	Less activity	2.33607	35.6242	0.194147	-33.2882	0.971813	0	-0.0002	0	1	0.99895	0.9995	1	0.0318643	0	0	NA	-	5.87314	6.691	0.202468	-0.185134
Higher RPS in Berkshire	3	115967050	ENSSSCG00000049418	Unknown	39.5929	27.1519	0.0469783	12.441	Inactive	0.107909	0.107909	-	116010000	116015000	Less activity	39.6177	11.4396	0.128028	28.1781	0.984052	0	-0.0002	0	1	0.99815	0.9986	0.9999	0.0278812	0	0	NA	-	12.0891	10.413	0.0702997	0.213416
Higher RPS in Berkshire	3	115967050	ENSSSCG00000049418	Unknown	39.5929	27.1519	0.0469783	12.441	Inactive	0.107909	0.107909	-	116015000	116020000	Less activity	24.908	12.6754	0.723594	12.2326	0.997976	0	-0.0002	0	1	0.996257	0.998469	0.999867	0.0248	0	0	NA	-	7.95197	8.12686	0.916203	-0.0309992
Higher RPS in Berkshire	3	115967050	ENSSSCG00000049418	Unknown	39.5929	27.1519	0.0469783	12.441	Inactive	0.107909	0.107909	-	116030000	116035000	Less activity	24.2836	13.8327	0.611855	10.4508	0.999883	0	-0.0002	0	1	0.99955	0.999367	1	0.0184875	0	0	NA	-	2.44115	1.85392	0.253038	0.379113
Higher RPS in Berkshire	3	115967050	ENSSSCG00000049418	Unknown	39.5929	27.1519	0.0469783	12.441	Inactive	0.107909	0.107909	-	116035000	116040000	Less activity	8.76582	24.0775	0.537028	-15.3116	0.998695	0	-0.0002	0	1	0.99935	0.998767	1	0.0170654	0	0	NA	-	1.74897	1.48712	0.648142	0.220308
Higher RPS in Berkshire	3	115967050	ENSSSCG00000049418	Unknown	39.5929	27.1519	0.0469783	12.441	Inactive	0.107909	0.107909	-	116040000	116045000	Less activity	13.0003	0	0.184454	13.0003	0.999867	0	-0.0002	0	1	0.999	0.998634	0.9999	0.0158536	0	0	NA	-	3.87735	3.07448	0.671654	0.325287
Higher RPS in Berkshire	3	115967050	ENSSSCG00000049418	Unknown	39.5929	27.1519	0.0469783	12.441	Inactive	0.107909	0.107909	-	116045000	116050000	Less activity	25.1713	52.2647	0.596113	-27.0933	0.999519	0	-0.0002	0	1	0.99945	0.999	0.9999	0.0148067	0	0	NA	-	2.42651	2.72301	0.65248	-0.16009
Higher RPS in Berkshire	3	115967050	ENSSSCG00000049418	Unknown	39.5929	27.1519	0.0469783	12.441	Inactive	0.107909	0.107909	-	116070000	116075000	Less activity	0	77.4726	0.23037	-77.4726	0.994147	0	-0.0002	0	1	0.993963	0.995181	0.999333	0.011235	0	0	NA	-	6.55396	9.84799	0.175437	-0.580191
Higher RPS in Berkshire	3	115967050	ENSSSCG00000049418	Unknown	39.5929	27.1519	0.0469783	12.441	Inactive	0.107909	0.107909	-	116075000	116080000	Less activity	28.7184	9.46873	0.22964	19.2497	0.999941	0	-0.0002	0	1	0.994107	0.997402	0.994408	0.0106619	0	0	NA	-	12.128	13.7733	0.631973	-0.182122
Higher RPS in Berkshire	3	115967050	ENSSSCG00000049418	Unknown	39.5929	27.1519	0.0469783	12.441	Inactive	0.107909	0.107909	-	116080000	116085000	Less activity	28.3676	12.5927	0.588103	15.7749	0.999955	0	-0.0002	0	1	0.994803	0.998734	0.995202	0.0101932	0	0	NA	-	11.2102	15.4243	0.067825	-0.456906
Higher RPS in Berkshire	3	115967050	ENSSSCG00000049418	Unknown	39.5929	27.1519	0.0469783	12.441	Inactive	0.107909	0.107909	-	116090000	116095000	Less activity	29.0387	0	0.0640661	29.0387	0.999572	0	-0.0002	0	1	0.987104	0.989217	0.9974	0.00810208	0	0	NA	-	20.8424	21.7149	0.714284	-0.0588871
Higher RPS in Berkshire	3	115967050	ENSSSCG00000049418	Unknown	39.5929	27.1519	0.0469783	12.441	Inactive	0.107909	0.107909	-	116105000	116110000	Less activity	11.7276	15.558	0.87504	-3.83044	0.98289	0	-0.0002	0	1	0.974824	0.993734	1	0.00759444	0	0	NA	-	20.9602	23.1837	0.189754	-0.144795
Higher RPS in Berkshire	3	115967050	ENSSSCG00000049418	Unknown	39.5929	27.1519	0.0469783	12.441	Inactive	0.107909	0.107909	-	116110000	116115000	Less activity	42.3633	0	0.189197	42.3633	0.968038	0	-0.0002	0	1	0.985318	0.994804	1	0.00785714	0	0	NA	-	19.3983	26.3351	0.143452	-0.439107
Higher RPS in Berkshire	3	115967050	ENSSSCG00000049418	Unknown	39.5929	27.1519	0.0469783	12.441	Inactive	0.107909	0.107909	-	116140000	116145000	Less activity	8.91659	40.5856	0.369091	-31.669	0.996458	0	-0.0002	0	1	0.990937	0.998599	0.996506	0.00745588	0	0	NA	-	18.042	16.4986	0.687073	0.128276
Higher RPS in Berkshire	3	115967050	ENSSSCG00000049418	Unknown	39.5929	27.1519	0.0469783	12.441	Inactive	0.107909	0.107909	-	116145000	116150000	Less activity	7.17401	14.9446	0.704341	-7.77055	0.998301	0	-0.0002	0	1	0.992029	0.998329	0.998202	0.00727	0	0	NA	-	18.6436	16.9769	0.406842	0.134352
Higher RPS in Berkshire	3	115967050	ENSSSCG00000049418	Unknown	39.5929	27.1519	0.0469783	12.441	Inactive	0.107909	0.107909	-	116150000	116155000	Less activity	16.4705	0	0.184714	16.4705	0.999134	0	-0.0002	0	1	0.986651	0.996666	0.994777	0.00714722	0	0	NA	-	19.2197	17.205	0.512597	0.158884
Higher RPS in Berkshire	3	115967050	ENSSSCG00000049418	Unknown	39.5929	27.1519	0.0469783	12.441	Inactive	0.107909	0.107909	-	116165000	116170000	Less activity	25.61	0	0.183855	25.61	0.999826	0	-0.0002	0	1	0.98933	0.999667	1	0.00662564	0	0	NA	-	21.0151	22.9979	0.583776	-0.129483
Higher RPS in Berkshire	3	115967050	ENSSSCG00000049418	Unknown	39.5929	27.1519	0.0469783	12.441	Inactive	0.107909	0.107909	-	116190000	116195000	Less activity	18.8432	24.6227	0.881505	-5.77948	0.994576	0	-0.0002	0	1	0.9943	0.996895	0.9999	0.038617	0	0	NA	-	16.3233	14.6922	0.652889	0.150906
Higher RPS in Berkshire	3	115967050	ENSSSCG00000049418	Unknown	39.5929	27.1519	0.0469783	12.441	Inactive	0.107909	0.107909	-	116235000	116240000	Less activity	26.523	0	0.0685769	26.523	0.999311	0	-0.0002	0	1	0.771496	0.845402	0.9996	0.0312132	0	0	NA	-	10.404	9.33472	0.408656	0.154891
Higher RPS in Berkshire	3	115967050	ENSSSCG00000049418	Unknown	39.5929	27.1519	0.0469783	12.441	Inactive	0.107909	0.107909	-	116275000	116280000	Less activity	17.8783	0	0.190316	17.8783	0.98968	0	-0.0002	0	1	0.99128	0.993071	0.998004	0.0307803	0	0	NA	-	19.0806	17.8581	0.229278	0.0950114
Higher RPS in Berkshire	3	115967050	ENSSSCG00000049418	Unknown	39.5929	27.1519	0.0469783	12.441	Inactive	0.107909	0.107909	-	116365000	116370000	Less activity	0	46.1942	0.18169	-46.1942	0.999931	0	-0.0002	0	1	0.972713	0.964877	1	0.02385	0	0	NA	-	7.04697	8.9435	0.148561	-0.33955
Higher RPS in Berkshire	3	115967050	ENSSSCG00000049418	Unknown	39.5929	27.1519	0.0469783	12.441	Inactive	0.107909	0.107909	-	116395000	116400000	Less activity	18.1962	0	0.183054	18.1962	0.999648	0	-0.0002	0	1	0.996615	0.994164	1	0.0210806	0	0	NA	-	10.1887	10.2697	0.94337	-0.0113082
Higher RPS in Berkshire	3	115967050	ENSSSCG00000049418	Unknown	39.5929	27.1519	0.0469783	12.441	Inactive	0.107909	0.107909	-	116415000	116420000	Less activity	27.2836	0	0.201719	27.2836	0.999391	0	-0.0002	0	1	0.9932	0.998998	1	0.020132	0	0	NA	-	20.8025	18.0737	0.540409	0.20182
Higher RPS in Berkshire	3	115967050	ENSSSCG00000049418	Unknown	39.5929	27.1519	0.0469783	12.441	Inactive	0.107909	0.107909	-	116590000	116595000	Less activity	10.8367	10.8974	0.997483	-0.06075	0.987713	0	-0.0002	0	1	0.995151	0.996165	0.999233	0.0146077	0	0	NA	-	17.9366	14.8379	0.293213	0.271946
Higher RPS in Berkshire	3	115967050	ENSSSCG00000049418	Unknown	39.5929	27.1519	0.0469783	12.441	Inactive	0.107909	0.107909	-	116600000	116605000	Less activity	19.798	34.9195	0.700242	-15.1215	0.997169	0	-0.0002	0	1	0.996301	0.9977	0.999767	0.0143944	0	0	NA	-	16.1446	13.6401	0.310103	0.241577
Higher RPS in Berkshire	3	115967050	ENSSSCG00000049418	Unknown	39.5929	27.1519	0.0469783	12.441	Inactive	0.107909	0.107909	-	116630000	116635000	Less activity	11.2508	15.7767	0.851646	-4.52591	0.997206	0	-0.0002	0	1	0.9927	0.999899	0.9999	0.0138405	0	0	NA	-	5.24484	6.36394	0.1139	-0.274265
Higher RPS in Berkshire	3	115967050	ENSSSCG00000049418	Unknown	39.5929	27.1519	0.0469783	12.441	Inactive	0.107909	0.107909	-	116640000	116645000	Less activity	8.93883	11.1284	0.902441	-2.18955	0.999846	0	-0.0002	0	1	0.98898	0.994523	1	0.0136929	0	0	NA	-	20.2193	21.5299	0.327887	-0.0901727
Higher RPS in Berkshire	3	115967050	ENSSSCG00000049418	Unknown	39.5929	27.1519	0.0469783	12.441	Inactive	0.107909	0.107909	-	116710000	116715000	Less activity	10.5176	7.73103	0.864356	2.78655	0.996769	0	-0.0002	0	1	0.9948	0.995798	0.9998	0.012403	0	0	NA	-	10.2097	12.7477	0.516044	-0.317499
Higher RPS in Berkshire	3	115967050	ENSSSCG00000049418	Unknown	39.5929	27.1519	0.0469783	12.441	Inactive	0.107909	0.107909	-	116775000	116780000	Less activity	23.9692	0	0.191224	23.9692	0.998888	0	-0.0002	0	1	0.995505	0.995206	1	0.0117143	0	0	NA	-	13.762	15.8753	0.0767033	-0.204708
Higher RPS in Berkshire	3	115967050	ENSSSCG00000049418	Unknown	39.5929	27.1519	0.0469783	12.441	Inactive	0.107909	0.107909	-	116880000	116885000	Less activity	0	20.4771	0.212418	-20.4771	0.995292	0	-0.0002	0	1	0.987687	0.998936	0.9999	0.0101157	0	0	NA	-	24.441	20.7248	0.106397	0.236888
Higher RPS in Berkshire	3	115967050	ENSSSCG00000049418	Unknown	39.5929	27.1519	0.0469783	12.441	Inactive	0.107909	0.107909	-	117180000	117185000	Less activity	13.7033	0	0.181698	13.7033	0.979373	0	-0.0002	0	1	0.933475	0.984635	0.886647	0.00780744	0	0	NA	-	23.0788	26.0093	0.328962	-0.171758
Higher RPS in Berkshire	3	115967050	ENSSSCG00000049418	Unknown	39.5929	27.1519	0.0469783	12.441	Inactive	0.107909	0.107909	-	117260000	117265000	Less activity	8.43771	8.44241	0.999749	-0.0047	0.854074	0	-0.0002	0	1	0.997725	0.997501	0.999467	0.0038874	0	0	NA	-	23.2708	21.6089	0.206327	0.106425
Higher RPS in Berkshire	3	115967050	ENSSSCG00000049418	Unknown	39.5929	27.1519	0.0469783	12.441	Inactive	0.107909	0.107909	-	117545000	117550000	Less activity	25.5538	0	0.18169	25.5538	0.982766	0	-0.0002	0	1	0.969311	0.987551	1	0.0034354	0	0	NA	-	25.3103	27.4306	0.40669	-0.115623
Higher RPS in Berkshire	3	115967050	ENSSSCG00000049418	Unknown	39.5929	27.1519	0.0469783	12.441	Inactive	0.107909	0.107909	-	117550000	117555000	Moderate activity	12.7399	12.744	0.999856	-0.004075	0.997584	0	-0.0002	0	1	0.932209	0.985343	1	0.00347231	0	0	NA	-	46.0109	31.448	0.000344538	0.54756
Higher RPS in Berkshire	3	115967050	ENSSSCG00000049418	Unknown	39.5929	27.1519	0.0469783	12.441	Inactive	0.107909	0.107909	-	119535000	119540000	Less activity	13.683	0	0.18169	13.683	0.995174	0	-0.0002	0	1	0.990603	0.995755	0.9997	0.00168436	0	0	NA	-	17.5441	17.7657	0.953914	-0.0180046
Higher RPS in Berkshire	3	115967050	ENSSSCG00000049418	Unknown	39.5929	27.1519	0.0469783	12.441	Inactive	0.107909	0.107909	-	120405000	120410000	Less activity	0	14.6726	0.18169	-14.6726	0.99704	0	-0.0002	0	1	0.995853	0.997996	0.999793	0.00118168	0	0	NA	-	17.7681	19.4818	0.402971	-0.132127
Higher RPS in Berkshire	3	115967050	ENSSSCG00000049418	Unknown	39.5929	27.1519	0.0469783	12.441	Inactive	0.107909	0.107909	-	121650000	121655000	Less activity	5.93172	5.93172	1	0	0.732186	0	-0.0002	0	1	0.983596	0.991964	0.990612	-9.66109e-05	0	0	NA	-	48.2593	42.5753	0.136304	0.180391
Higher RPS in Berkshire	3	115967050	ENSSSCG00000049418	Unknown	39.5929	27.1519	0.0469783	12.441	Inactive	0.107909	0.107909	-	122980000	122985000	Less activity	0	17.4572	0.18169	-17.4572	0.999865	0	-0.0002	0	1	0.9978	0.9985	0.997133	-0.000129529	0	0	NA	-	9.5335	10.6775	0.381586	-0.161893
Higher RPS in Berkshire	3	115969069	ENSSSCG00000046275	Unknown	39.5929	27.1519	0.0469783	12.441	Inactive	0.216859	0.216859	-	114950000	114955000	Less activity	11.0686	17.6727	0.391251	-6.6041	0.695991	0.520816	-0.0002	0	1	0.98628	0.986357	0.996873	0.00633193	0	0	NA	-	32.1634	34.7831	0.331096	-0.11263
Higher RPS in Berkshire	3	115969069	ENSSSCG00000046275	Unknown	39.5929	27.1519	0.0469783	12.441	Inactive	0.216859	0.216859	-	115120000	115125000	Less activity	0	29.2897	0.18169	-29.2897	0.833408	0.80755	-0.0002	0	1	0.988409	0.995934	0.998001	0.00643899	0	0	NA	-	31.8154	33.2991	0.372981	-0.0655576
Higher RPS in Berkshire	3	115969069	ENSSSCG00000046275	Unknown	39.5929	27.1519	0.0469783	12.441	Inactive	0.216859	0.216859	-	115410000	115415000	Less activity	20.2372	0	0.188851	20.2372	0.951602	0.784195	-0.0002	0	1	0.995252	0.996701	1	0.00734818	0	0	NA	-	12.9203	13.535	0.393672	-0.0665515
Higher RPS in Berkshire	3	115969069	ENSSSCG00000046275	Unknown	39.5929	27.1519	0.0469783	12.441	Inactive	0.216859	0.216859	-	115430000	115435000	Less activity	33.8669	0	0.222744	33.8669	0.989751	0.882054	-0.0002	0	1	0.997102	0.997603	1	0.00762123	0	0	NA	-	14.0131	15.9589	0.117413	-0.186339
Higher RPS in Berkshire	3	115969069	ENSSSCG00000046275	Unknown	39.5929	27.1519	0.0469783	12.441	Inactive	0.216859	0.216859	-	115435000	115440000	Less activity	14.1726	18.2806	0.887089	-4.10793	0.948375	0.996721	-0.0002	0	1	0.997352	0.998867	0.9999	0.00769571	0	0	NA	-	10.456	7.7545	0.0870401	0.426478
Higher RPS in Berkshire	3	115969069	ENSSSCG00000046275	Unknown	39.5929	27.1519	0.0469783	12.441	Inactive	0.216859	0.216859	-	115465000	115470000	Less activity	18.1836	0	0.190665	18.1836	0.881778	0.732834	-0.0002	0	1	0.992982	0.998971	1	0.00821061	0	0	NA	-	16.9354	16.8506	0.984474	0.00719735
Higher RPS in Berkshire	3	115969069	ENSSSCG00000046275	Unknown	39.5929	27.1519	0.0469783	12.441	Inactive	0.216859	0.216859	-	115630000	115635000	Less activity	15.9381	0	0.183707	15.9381	0.885468	0.489758	-0.0002	0	1	0.994755	0.996707	1	0.0104909	0	0	NA	-	21.8015	20.6763	0.608662	0.0760926
Higher RPS in Berkshire	3	115969069	ENSSSCG00000046275	Unknown	39.5929	27.1519	0.0469783	12.441	Inactive	0.216859	0.216859	-	115690000	115695000	Less activity	22.1056	0	0.183382	22.1056	0.973089	0.880542	-0.0002	0	1	0.99391	0.993248	0.996072	0.0129972	0	0	NA	-	18.7703	17.6732	0.695217	0.086412
Higher RPS in Berkshire	3	115969069	ENSSSCG00000046275	Unknown	39.5929	27.1519	0.0469783	12.441	Inactive	0.216859	0.216859	-	115805000	115810000	Less activity	13.3974	0	0.186083	13.3974	0.986261	0.910157	-0.0002	0	1	0.99675	0.9976	0.999767	0.0164919	0	0	NA	-	9.76334	13.5236	0.12613	-0.465963
Higher RPS in Berkshire	3	115969069	ENSSSCG00000046275	Unknown	39.5929	27.1519	0.0469783	12.441	Inactive	0.216859	0.216859	-	115855000	115860000	Less activity	8.44475	21.1228	0.649847	-12.6781	0.889744	0.966132	-0.0002	0	1	0.99465	0.9962	0.9999	0.0241167	0	0	NA	-	14.6441	18.4742	0.0189954	-0.333157
Higher RPS in Berkshire	3	115969069	ENSSSCG00000046275	Unknown	39.5929	27.1519	0.0469783	12.441	Inactive	0.216859	0.216859	-	115860000	115865000	Less activity	42.8443	3.93513	0.146177	38.9092	0.998086	0.658187	-0.0002	0	1	0.988867	0.993011	0.999567	0.0253025	0	0	NA	-	20.7469	22.3619	0.414815	-0.107646
Higher RPS in Berkshire	3	115969069	ENSSSCG00000046275	Unknown	39.5929	27.1519	0.0469783	12.441	Inactive	0.216859	0.216859	-	115865000	115870000	Less activity	9.10413	20.8774	0.54879	-11.7732	0.993572	0.971791	-0.0002	0	1	0.947288	0.997431	0.9999	0.0293184	0	0	NA	-	19.2975	16.5493	0.0699923	0.22041
Higher RPS in Berkshire	3	115969069	ENSSSCG00000046275	Unknown	39.5929	27.1519	0.0469783	12.441	Inactive	0.216859	0.216859	-	115870000	115875000	Less activity	20.5362	21.4683	0.958905	-0.932082	0.991217	0.78646	-0.0002	0	1	0.996552	0.995904	0.9994	0.0309944	0	0	NA	-	12.9271	11.3605	0.127107	0.184838
Higher RPS in Berkshire	3	115969069	ENSSSCG00000046275	Unknown	39.5929	27.1519	0.0469783	12.441	Inactive	0.216859	0.216859	-	115885000	115890000	Less activity	8.89995	16.3253	0.747467	-7.42531	0.981987	0.970772	-0.0002	0	1	0.9981	0.9983	0.9999	0.0371967	0	0	NA	-	5.36097	5.14015	0.701516	0.0595491
Higher RPS in Berkshire	3	115969069	ENSSSCG00000046275	Unknown	39.5929	27.1519	0.0469783	12.441	Inactive	0.216859	0.216859	-	115890000	115895000	Less activity	0	69.9475	0.217025	-69.9475	0.994781	0.992365	-0.0002	0	1	0.995877	0.998	0.9999	0.0398036	0	0	NA	-	12.1367	12.3216	0.940112	-0.0216374
Higher RPS in Berkshire	3	115969069	ENSSSCG00000046275	Unknown	39.5929	27.1519	0.0469783	12.441	Inactive	0.216859	0.216859	-	115895000	115900000	Less activity	9.8548	26.4449	0.631221	-16.5901	0.990352	0.979567	-0.0002	0	1	0.878971	0.919381	1	0.0341308	0	0	NA	-	17.2978	12.1727	0.035744	0.503454
Higher RPS in Berkshire	3	115969069	ENSSSCG00000046275	Unknown	39.5929	27.1519	0.0469783	12.441	Inactive	0.216859	0.216859	-	115900000	115905000	Less activity	0	80.0869	0.0769818	-80.0869	0.923262	0.996812	-0.0002	0	1	0.994751	0.996601	0.9999	0.0369792	0	0	NA	-	13.1918	14.2696	0.549298	-0.112482
Higher RPS in Berkshire	3	115969069	ENSSSCG00000046275	Unknown	39.5929	27.1519	0.0469783	12.441	Inactive	0.216859	0.216859	-	115905000	115910000	Less activity	35.265	22.7822	0.766539	12.4828	0.998649	0.988034	-0.0002	0	1	0.9968	0.998	0.9998	0.0403409	0	0	NA	-	9.91118	10.5633	0.844667	-0.0910487
[truncated: 2,416 more rows]

## Sheet: Sheet 3 (muscle)
Genes with differential RPS between parental breeds	Chromosome	TSS position	Gene Ensembl ID	Gene symbol	RPS		P-value of RPS	ΔRPS (Berkshire – Tibetan)	Promoter type	TPM		Allelic expression ratio of Berkshire	Enhancer location		Enhancer type	PEI intensity		P-value of PEI intensity	ΔPEI intensity (Berkshire – Tibetan)	PEI probability		IDS of promoter region			IDS of enhancer region			PEI interval change ratio (Berkshire / Tibetan)	H3K4me3 signal of promoter region		P-value of H3K4me3 signal	log2FC of H3K4me3 (Berkshire / Tibetan)	H3K27ac signal of enhancer region		P-value of H3K27ac signal	log2FC of H3K27ac (Berkshire / Tibetan)
[truncated: 3,735 more rows]

[truncated: 2 more sheets: Sheet 4 (brain), ReadMe]
